# Supplementary material
Source: PubMed Central journal article supplement (PMC3836591)
Supplement: NIHMS251768-supplement-01.pdf [file NIHMS251768-supplement-01.pdf]

Type of file: table

Label: Table 1

Filename: PubMed\_17911086\_Hojlund\_Table1.pdf

M700304-MCP 2  
Supplemental Table I. Proteins identified in human muscle biopsy tissue

| Protein Group <sup>2</sup> | IPI ID                                            | IPI gene name | Amino Acids in Sequence <sup>1</sup> |      |      | Protein Molecular Weight <sup>1</sup> |         |         | Seq. Cov. (max) | Unique Peptides (max) | Detection |           |          |           |                                                                                                                                                                                                | Protein name                                                           | Uniprot Id                                                                        | Uniprot Entry Name |
|----------------------------|---------------------------------------------------|---------------|--------------------------------------|------|------|---------------------------------------|---------|---------|-----------------|-----------------------|-----------|-----------|----------|-----------|------------------------------------------------------------------------------------------------------------------------------------------------------------------------------------------------|------------------------------------------------------------------------|-----------------------------------------------------------------------------------|--------------------|
|                            |                                                   |               | Min.                                 | Max. | Mean | Min.                                  | Max.    | Mean    |                 |                       | Expt. I-1 | Expt. I-2 | Expt. II | Expt. III |                                                                                                                                                                                                |                                                                        |                                                                                   |                    |
| 1                          | IPI0000690; IPI00157908                           | AIFM1         | 609                                  | 613  | 611  | 6.6E+04                               | 6.7E+04 | 6.7E+04 | 28.4            | 12                    | 1         | 1         | 1        | 1         | ISOFORM 1 OF APOPTOSIS-INDUCING FACTOR 1, MITOCHONDRIAL PRECURSOR.; ISOFORM 3 OF APOPTOSIS-INDUCING FACTOR 1, MITOCHONDRIAL PRECURSOR.                                                         | Q85831; Q116K4; Q116K6; Q5JUZ7; Q5RZ99; Q5RZA0; Q6I9X6; Q9Y3I3; Q9Y3I4 | AIFM1_HUMAN; Q116K4_HUMAN; Q116K6_HUMAN; Q5RZ99_HUMAN; Q5RZA0_HUMAN               |                    |
| 2                          | IPI0000792; IPI00641565; IPI00642016; IPI00647366 | CRYZ          | 206                                  | 329  | 268  | 2.2E+04                               | 3.5E+04 | 2.9E+04 | 18.4            | 3                     | 1         | 1         | 1        | 0         | QUINONE OXIDOREDUCTASE.; 26 KDA PROTEIN.; 22 KDA PROTEIN.; 32 KDA PROTEIN.                                                                                                                     | Q08257; Q53FT0; Q59EU7; Q6NSK9                                         | : QOR_HUMAN                                                                       |                    |
| 3                          | IPI00000811; IPI00789119; IPI00796198             | PSMB6         | 114                                  | 239  | 181  | 1.2E+04                               | 2.5E+04 | 1.9E+04 | 13.4            | 3                     | 0         | 0         | 1        | 1         | PROTEASOME SUBUNIT BETA TYPE 6 PRECURSOR.; 20 KDA PROTEIN.; 12 KDA PROTEIN.                                                                                                                    | P28072; Q6IAT9; Q96J55                                                 | : PSB6_HUMAN; Q6IAT9_HUMAN                                                        |                    |
| 4                          | IPI00000816                                       | YWHAE         | 255                                  | 255  | 255  | 2.9E+04                               | 2.9E+04 | 2.9E+04 | 37.6            | 9                     | 1         | 1         | 1        | 1         | 14-3-3 PROTEIN EPSILON.                                                                                                                                                                        | P29360; P42655; P62258; Q4VJB6; Q53XZ5; Q63631                         | 1433E_HUMAN; Q4VJB6_HUMAN; Q53XZ5_HUMAN                                           |                    |
| 5                          | IPI00000874; IPI00640741                          | PRDX1         | 171                                  | 199  | 185  | 1.9E+04                               | 2.2E+04 | 2.1E+04 | 54.4            | 12                    | 1         | 1         | 1        | 1         | PEROXIREDOXIN-1.; 19 KDA PROTEIN.                                                                                                                                                              | P35703; Q06830; Q2V576; Q5T154; Q5T155                                 | : PRDX1_HUMAN                                                                     |                    |
| 6                          | IPI00000875; IPI00747497                          | EEF1G         | 436                                  | 437  | 437  | 5.0E+04                               | 5.0E+04 | 5.0E+04 | 14.0            | 5                     | 1         | 1         | 1        | 1         | ELONGATION FACTOR 1-GAMMA.; 50 KDA PROTEIN.                                                                                                                                                    | P26641; Q2F838; Q2F840; Q53YD7; Q6PJ62; Q6PK31; Q96CU2; Q9P196         | : EF1G_HUMAN; Q2F838_HUMAN; Q2F840_HUMAN; Q53YD7_HUMAN                            |                    |
| 7                          | IPI00001091                                       | AFG3L2        | 797                                  | 797  | 797  | 8.9E+04                               | 8.9E+04 | 8.9E+04 | 10.5            | 7                     | 1         | 1         | 1        | 1         | AFG3-LIKE PROTEIN 2.                                                                                                                                                                           | Q6P1L0; Q8TA92; Q9Y4W6                                                 | AFG32_HUMAN; Q8TA92_HUMAN                                                         |                    |
| 8                          | IPI00001539                                       | ACAA2         | 397                                  | 397  | 397  | 4.2E+04                               | 4.2E+04 | 4.2E+04 | 39.0            | 11                    | 1         | 1         | 1        | 1         | 3-KETOACYL-COA THIOLEASE, MITOCHONDRIAL.                                                                                                                                                       | P42765; Q9BU76                                                         | THIM_HUMAN                                                                        |                    |
| 9                          | IPI00001589                                       | TIMM13        | 95                                   | 95   | 95   | 1.1E+04                               | 1.1E+04 | 1.1E+04 | 26.3            | 2                     | 0         | 0         | 1        | 0         | MITOCHONDRIAL IMPORT INNER MEMBRANE TRANSLOCASE SUBUNIT TIM13.                                                                                                                                 | P62206; Q9UHL8; Q9WTL1; Q9Y5L4                                         | TIM13_HUMAN                                                                       |                    |
| 10                         | IPI00001639                                       | KPNB1         | 876                                  | 876  | 876  | 9.7E+04                               | 9.7E+04 | 9.7E+04 | 8.7             | 5                     | 1         | 1         | 1        | 1         | IMPORTIN BETA-1 SUBUNIT.                                                                                                                                                                       | Q14637; Q14974; Q53XN2; Q96J27                                         | IMB1_HUMAN; Q53XN2_HUMAN                                                          |                    |
| 11                         | IPI00001730                                       | FHOD1         | 1164                                 | 1164 | 1164 | 1.3E+05                               | 1.3E+05 | 1.3E+05 | 7.4             | 7                     | 1         | 1         | 1        | 1         | FH1/FH2 DOMAIN-CONTAINING PROTEIN.                                                                                                                                                             | Q59F76; Q6Y1F2; Q76MS8; Q8N521;                                        | FHOD1_HUMAN                                                                       |                    |
| 12                         | IPI00002149                                       | SAR1B         | 198                                  | 198  | 198  | 2.2E+04                               | 2.2E+04 | 2.2E+04 | 19.7            | 2                     | 0         | 0         | 1        | 1         | GTP-BINDING PROTEIN SAR1B.                                                                                                                                                                     | Q8Y613; Q53F37; Q56774; Q9H029; Q9Y6B6                                 | : SAR1B_HUMAN                                                                     |                    |
| 13                         | IPI00002352                                       | MYLPP         | 170                                  | 170  | 170  | 1.9E+04                               | 1.9E+04 | 1.9E+04 | 61.8            | 18                    | 1         | 1         | 1        | 1         | MYOSIN LIGHT CHAIN 2.                                                                                                                                                                          | Q14843; Q6IB41; Q96A32                                                 | MLRS_HUMAN                                                                        |                    |
| 14                         | IPI00002459; IPI00221226                          | ANXA6         | 667                                  | 673  | 670  | 7.5E+04                               | 7.6E+04 | 7.6E+04 | 52.8            | 32                    | 1         | 1         | 1        | 1         | ANNEXIN VI ISOFORM 2.; ANNEXIN A6.                                                                                                                                                             | P08133; Q6Z79                                                          | : ANXA6_HUMAN                                                                     |                    |
| 15                         | IPI00002460; IPI00021771; IPI00514510             | ANXA7         | 466                                  | 488  | 481  | 5.0E+04                               | 5.3E+04 | 5.2E+04 | 10.9            | 4                     | 1         | 1         | 1        | 1         | ISOFORM 1 OF ANNEXIN A7.; ISOFORM 2 OF ANNEXIN A7.; ANNEXIN VII ISOFORM 2.                                                                                                                     | P20073; Q53HM8; Q5T0M6; Q5T0M7                                         | ANXA7_HUMAN; Q53HM8_HUMAN; Q5T0M6_HUMAN; Q5T0M7_HUMAN                             |                    |
| 16                         | IPI00002521; IPI00456008                          | ATP5J         | 108                                  | 116  | 112  | 1.3E+04                               | 1.3E+04 | 1.3E+04 | 45.4            | 5                     | 0         | 0         | 1        | 1         | ATP SYNTHASE COUPLING FACTOR 6, MITOCHONDRIAL PRECURSOR.; ATP SYNTHASE, H+ TRANSPORTING, MITOCHONDRIAL F0 COMPLEX, SUBUNIT F6ISOFORM B PRECURSOR.                                              | P18859; Q6IB54; Q6NZ59                                                 | : ATP5J_HUMAN; Q6IB54_HUMAN; Q6NZ59_HUMAN                                         |                    |
| 17                         | IPI00002536; IPI00216155; IPI00216156             | SESN1         | 426                                  | 551  | 490  | 5.0E+04                               | 6.4E+04 | 5.7E+04 | 5.9             | 2                     | 0         | 0         | 1        | 0         | ISOFORM T2 OF SESTRIN-1.; ISOFORM T1 OF SESTRIN-1.; ISOFORM T3 OF SESTRIN-1.                                                                                                                   | Q9UPD5; Q9Y6P5; Q9Y6P6                                                 | Q2M2B7_HUMAN; Q5T316_HUMAN; Q5T318_HUMAN; SESN1_HUMAN                             |                    |
| 18                         | IPI00002966                                       | HSPA4         | 840                                  | 840  | 840  | 9.4E+04                               | 9.4E+04 | 9.4E+04 | 10.8            | 6                     | 1         | 1         | 1        | 1         | HEAT SHOCK 70 KDA PROTEIN 4.                                                                                                                                                                   | O14992; Q85756; P34932; Q2TAL4; Q59GF8; Q7KYNO                         | HSP74_HUMAN; O14992_HUMAN; Q2TAL4_HUMAN; Q59GF8_HUMAN; Q7KYNO_HUMAN               |                    |
| 19                         | IPI00003021; IPI00640401                          | ATP1A2        | 1009                                 | 1020 | 1015 | 1.1E+05                               | 1.1E+05 | 1.1E+05 | 13.3            | 10                    | 1         | 1         | 1        | 1         | SODIUM/POTASSIUM-TRANSPORTING ATPASE ALPHA-2 CHAIN PRECURSOR.; CATION-TRANSPORTING ATPASE.                                                                                                     | Q59J22; Q5JW73; Q5JW74; Q86U25;                                        | AT1A2_HUMAN; Q59J22_HUMAN; Q5JW73_HUMAN; Q5JW74_HUMAN                             |                    |
| 20                         | IPI00003362                                       | HSPA5         | 655                                  | 655  | 655  | 7.2E+04                               | 7.2E+04 | 7.2E+04 | 35.1            | 19                    | 1         | 1         | 1        | 1         | HSPA5 PROTEIN.                                                                                                                                                                                 | Q9UQ25                                                                 | Q2KH4_HUMAN                                                                       |                    |
| 21                         | IPI00003482                                       | DECR1         | 335                                  | 335  | 335  | 3.6E+04                               | 3.6E+04 | 3.6E+04 | 20.6            | 5                     | 1         | 1         | 1        | 1         | 2,4-DIENYL-COA REDUCTASE, MITOCHONDRIAL PRECURSOR.                                                                                                                                             | Q16698; Q2M304; Q7LDK6; Q93085                                         | DECR_HUMAN; Q7LDK6_HUMAN                                                          |                    |
| 22                         | IPI00003814                                       | MAP2K6        | 334                                  | 334  | 334  | 3.7E+04                               | 3.7E+04 | 3.7E+04 | 12.6            | 3                     | 1         | 1         | 1        | 0         | ISOFORM 1 OF DUAL SPECIFICITY MITOGEN-ACTIVATED PROTEIN KINASE KINASE6.                                                                                                                        | P52564                                                                 | MP2K6_HUMAN                                                                       |                    |
| 23                         | IPI00003815; IPI00794402; IPI00796541             | ARHGDI1       | 204                                  | 249  | 229  | 2.3E+04                               | 2.8E+04 | 2.6E+04 | 15.2            | 4                     | 0         | 0         | 1        | 1         | RHO GDP-DISSOCIATION INHIBITOR 1.; 28 KDA PROTEIN.; 26 KDA PROTEIN.                                                                                                                            | P52565; Q6IBM5                                                         | : GDIR_HUMAN; Q6IBM5_HUMAN                                                        |                    |
| 24                         | IPI00003833                                       | MTCH2         | 303                                  | 303  | 303  | 3.3E+04                               | 3.3E+04 | 3.3E+04 | 15.2            | 3                     | 0         | 0         | 1        | 1         | MITOCHONDRIAL CARRIER HOMOLOG 2.                                                                                                                                                               | Q53C34; Q9Y6C9                                                         | MTCH2_HUMAN; Q53C34_HUMAN                                                         |                    |
| 25                         | IPI00003865                                       | HSPA8         | 646                                  | 646  | 646  | 7.1E+04                               | 7.1E+04 | 7.1E+04 | 43.6            | 23                    | 1         | 1         | 1        | 1         | ISOFORM 1 OF HEAT SHOCK COGNATE 71 KDA PROTEIN.                                                                                                                                                | P11142; Q53G26; Q96BE0; Q96H53; Q96IS6; Q9H3R6;                        | HSP70_HUMAN; Q53G26_HUMAN; Q96BE0_HUMAN; Q96H53_HUMAN; Q96IS6_HUMAN; Q9H3R6_HUMAN |                    |
| 26                         | IPI00003933; IPI00745553                          | HAGH          | 260                                  | 308  | 284  | 2.9E+04                               | 3.4E+04 | 3.1E+04 | 17.2            | 5                     | 0         | 0         | 1        | 1         | HYDROXYACYL GLUTATHIONE HYDROLASE ISOFORM 1.;                                                                                                                                                  | Q16775                                                                 | : GLO2_HUMAN                                                                      |                    |
| 27                         | IPI00003949                                       | UBE2N         | 152                                  | 152  | 152  | 1.7E+04                               | 1.7E+04 | 1.7E+04 | 27.0            | 3                     | 0         | 0         | 1        | 1         | UBIQUITIN-CONJUGATING ENZYME E2 N.                                                                                                                                                             | P61088; Q16781; Q53Y81                                                 | UBE2N_HUMAN                                                                       |                    |
| 28                         | IPI00003968                                       | NDUFA9        | 377                                  | 377  | 377  | 4.3E+04                               | 4.3E+04 | 4.3E+04 | 26.3            | 7                     | 1         | 1         | 1        | 1         | NADH DEHYDROGENASE [UBIQUINONE] 1 ALPHA SUBCOMPLEX SUBUNIT 9, MITOCHONDRIAL PRECURSOR.                                                                                                         | Q14076; Q16795; Q2NKX0; Q9BTT5                                         | NDUA9_HUMAN; Q9BTT5_HUMAN                                                         |                    |
| 29                         | IPI00004247; IPI00216725; IPI00446678             | PHKA1         | 1181                                 | 1240 | 1215 | 1.3E+05                               | 1.4E+05 | 1.4E+05 | 15.5            | 17                    | 1         | 1         | 1        | 1         | ISOFORM 1 OF PHOSPHORYLASE B KINASE REGULATORY SUBUNIT ALPHA, SKELETALMUSCLE ISOFORM.; ISOFORM 2 OF PHOSPHORYLASE B KINASE REGULATORY SUBUNIT ALPHA, SKELETALMUSCLE ISOFORM.; 133 KDA PROTEIN. | P46020; Q2M3D7                                                         | : KPB1_HUMAN                                                                      |                    |
| 30                         | IPI00004471                                       | PDLIM3        | 364                                  | 364  | 364  | 3.9E+04                               | 3.9E+04 | 3.9E+04 | 30.8            | 10                    | 1         | 1         | 1        | 1         | ISOFORM 1 OF PDZ AND LIM DOMAIN PROTEIN 3.                                                                                                                                                     | O43590; O60439; O60440; Q53GG5; Q8N6Y6; Q9BVP4                         | PDLI3_HUMAN                                                                       |                    |

| Protein Group <sup>a</sup> | IPI ID                                                                                                 | IPI gene name        | Amino Acids in Sequence <sup>b</sup> |      |      | Protein Molecular Weight <sup>c</sup> |         |         | Seq. Cov. (max) | Unique Peptides (max) | Detection |           |          |           | Protein name                                                                                                                                                                                                                                                                                                                                                                                                                                                                                                                      | Uniprot Id                                                                                                                                                                                                      | Uniprot Entry Name                                                                                                                                                                                                                                                                                                                          |
|----------------------------|--------------------------------------------------------------------------------------------------------|----------------------|--------------------------------------|------|------|---------------------------------------|---------|---------|-----------------|-----------------------|-----------|-----------|----------|-----------|-----------------------------------------------------------------------------------------------------------------------------------------------------------------------------------------------------------------------------------------------------------------------------------------------------------------------------------------------------------------------------------------------------------------------------------------------------------------------------------------------------------------------------------|-----------------------------------------------------------------------------------------------------------------------------------------------------------------------------------------------------------------|---------------------------------------------------------------------------------------------------------------------------------------------------------------------------------------------------------------------------------------------------------------------------------------------------------------------------------------------|
|                            |                                                                                                        |                      | Min.                                 | Max. | Mean | Min.                                  | Max.    | Mean    |                 |                       | Expt. I-1 | Expt. I-2 | Expt. II | Expt. III |                                                                                                                                                                                                                                                                                                                                                                                                                                                                                                                                   |                                                                                                                                                                                                                 |                                                                                                                                                                                                                                                                                                                                             |
| 31                         | IPI00004860; IPI00759723                                                                               | RARS                 | 588                                  | 660  | 624  | 6.7E+04                               | 7.5E+04 | 7.1E+04 | 3.9             | 2                     | 0         | 0         | 1        | 0         | ISOFORM COMPLEXED OF ARGINYL-TRNA SYNTHETASE, CYTOPLASMIC.; ISOFORM MONOMERIC OF ARGINYL-TRNA SYNTHETASE, CYTOPLASMIC.                                                                                                                                                                                                                                                                                                                                                                                                            | P54136; Q53GY4; Q9BWA1                                                                                                                                                                                          | Q53GY4_HUMAN; SYRC_HUMAN                                                                                                                                                                                                                                                                                                                    |
| 32                         | IPI00004902; IPI00556451                                                                               | ETFB                 | 255                                  | 346  | 301  | 2.8E+04                               | 3.7E+04 | 3.3E+04 | 32.9            | 9                     | 0         | 0         | 1        | 1         | FLAVOPROTEIN SUBUNIT BETA.                                                                                                                                                                                                                                                                                                                                                                                                                                                                                                        | P38117; Q61BH7; Q71RF6; Q9Y3S7                                                                                                                                                                                  | ETFB_HUMAN                                                                                                                                                                                                                                                                                                                                  |
| 33                         | IPI00005040; IPI00513827                                                                               | ACADM                | 421                                  | 454  | 438  | 4.7E+04                               | 5.0E+04 | 4.8E+04 | 35.1            | 11                    | 1         | 1         | 1        | 1         | MEDIUM-CHAIN SPECIFIC ACYL-COA DEHYDROGENASE, MITOCHONDRIAL PRECURSOR.; HYPOTHETICAL PROTEIN DKFZP686M24262.                                                                                                                                                                                                                                                                                                                                                                                                                      | Q5T4U4; Q5T4U5; Q9NYF1                                                                                                                                                                                          | ACADM_HUMAN; Q5HYG7_HUMAN; Q5T4U4_HUMAN; Q5T4U5_HUMAN                                                                                                                                                                                                                                                                                       |
| 34                         | IPI00005158; IPI00334291                                                                               | LONP1                | 896                                  | 959  | 928  | 1.0E+05                               | 1.1E+05 | 1.0E+05 | 12.2            | 9                     | 1         | 1         | 1        | 1         | CDNA FLJ39307 FIS, CLONE OCBF2013208, HIGHLY SIMILAR TO MITOCHONDRIAL LON PROTEASE.                                                                                                                                                                                                                                                                                                                                                                                                                                               | P36776; P36777; Q2VPA0; Q8N8K8; Q9LQJ5                                                                                                                                                                          | LONM_HUMAN; Q2VPA0_HUMAN; Q8N8K8_HUMAN                                                                                                                                                                                                                                                                                                      |
| 35                         | IPI00005688; IPI00029733; IPI00289524; IPI00291483; IPI00394704; IPI00455167; IPI00514814; IPI00738657 | AKR1C1; AKR1C2; SMPX | 223                                  | 323  | 287  | 2.5E+04                               | 3.7E+04 | 3.3E+04 | 13.0            | 3                     | 1         | 1         | 1        | 1         | ALDO-KETO REDUCTASE FAMILY 1 MEMBER C2.; ALDO-KETO REDUCTASE FAMILY 1 MEMBER C1.; ALDO-KETO REDUCTASE FAMILY 1 MEMBER C4.; ALDO-KETO REDUCTASE FAMILY 1 MEMBER C3.; DIHYDRODIOL DEHYDROGENASE DD1 (FRAGMENT); DIHYDRODIOL DEHYDROGENASE DD2.; ALDO-KETO REDUCTASE FAMILY 1, MEMBER C1.; SIMILAR TO ALDO-KETO REDUCTASE FAMILY 1 MEMBER C1 (20-ALPHA-HYDROXYSTEROID DEHYDROGENASE) (20-ALPHA-HSD) (TRANS-1,2-DIHYDROBENZENE-1,2-DIOL DEHYDROGENASE) (HIGH-AFFINITY HEPATIC BILEACID-BINDING PROTEIN) (HBA) (CHLORDECONE REDUCTASE) | Q95300; Q9NS54; Q9LXC1; Q9UCX2; Q9LUI3; Q9UKL9                                                                                                                                                                  | ; AK1C1_HUMAN; AK1C2_HUMAN; AK1C3_HUMAN; AK1C4_HUMAN; Q2XFP3_HUMAN; Q59GU2_HUMAN; Q5SR14_HUMAN; Q5SR16_HUMAN; Q7M4N1_HUMAN; Q7M4N2_HUMAN; Q8WV84_HUMAN; Q86A71; Q86DJ1; Q86K18; Q86SD9; Q99530; Q9NS54; Q9LXC1; Q9UCX2; Q9LUI3; Q9UKL9                                                                                                      |
| 36                         | IPI00005957                                                                                            | SMPX                 | 88                                   | 88   | 88   | 9.6E+03                               | 9.6E+03 | 9.6E+03 | 43.2            | 3                     | 0         | 0         | 1        | 0         | HOMOLOG HAKRC...ISOFORM 1.                                                                                                                                                                                                                                                                                                                                                                                                                                                                                                        | Q9VSM2                                                                                                                                                                                                          | Q9VSM2_HUMAN                                                                                                                                                                                                                                                                                                                                |
| 37                         | IPI00006091; IPI00304639; IPI00375141; IPI00472316                                                     | DMD                  | 3562                                 | 3685 | 3651 | 4.1E+05                               | 4.3E+05 | 4.2E+05 | 5.4             | 15                    | 0         | 0         | 1        | 0         | SMALL MUSCLE PROTEIN, X-LINKED.                                                                                                                                                                                                                                                                                                                                                                                                                                                                                                   | P11532; Q02295; Q14169; Q14170; Q548X2; Q5JXQ4; Q5JXW4; Q5JYU0; Q6PK12; Q7KZ40; Q7KZ48; Q8WYD8; Q8WYD9; Q8WYE0; Q8WYE1; Q8WYE2; Q8WYE3; Q8WYE4; Q8WYE5; Q8WYE6; Q8WYE7; Q8WYE8; Q8WYE9; Q8WYF0; Q8WYF1; Q8WYF2; | DMD_HUMAN; Q548X2_HUMAN; Q5JXQ4_HUMAN; Q5JXW4_HUMAN; Q6PK12_HUMAN; Q7KZ40_HUMAN; Q8WYD8_HUMAN; Q8WYD9_HUMAN; Q8WYE0_HUMAN; Q8WYE1_HUMAN; Q8WYE2_HUMAN; Q8WYE3_HUMAN; Q8WYE4_HUMAN; Q8WYE5_HUMAN; Q8WYE6_HUMAN; Q8WYE7_HUMAN; Q8WYE8_HUMAN; Q8WYF0_HUMAN; Q8WYF1_HUMAN; Q8WYF2_HUMAN; Q9UEH4_HUMAN; Q9UMG1_HUMAN; Q9UPB4_HUMAN; Q9UPB5_HUMAN |
| 38                         | IPI00006211                                                                                            | VAPB                 | 243                                  | 243  | 243  | 2.7E+04                               | 2.7E+04 | 2.7E+04 | 17.3            | 3                     | 0         | 0         | 1        | 1         | ISOFORM 1 OF VESICLE-ASSOCIATED MEMBRANE PROTEIN-ASSOCIATED PROTEIN/B/C.                                                                                                                                                                                                                                                                                                                                                                                                                                                          | Q95232; Q95293; Q53XM7; Q9P0H0                                                                                                                                                                                  | Q53XM7_HUMAN; VAPB_HUMAN                                                                                                                                                                                                                                                                                                                    |
| 39                         | IPI00006579                                                                                            | COX4I1               | 169                                  | 169  | 169  | 2.0E+04                               | 2.0E+04 | 2.0E+04 | 46.1            | 8                     | 1         | 1         | 1        | 1         | CYTOCHROME C OXIDASE SUBUNIT 4 ISOFORM 1, MITOCHONDRIAL PRECURSOR.                                                                                                                                                                                                                                                                                                                                                                                                                                                                | P13073; Q6P666; P05091; Q03639; Q53FB6; Q61B13; Q61V71; Q9UN17                                                                                                                                                  | COX41_HUMAN; Q6P666_HUMAN                                                                                                                                                                                                                                                                                                                   |
| 40                         | IPI00006663; IPI00792207                                                                               | ALDH2                | 517                                  | 517  | 517  | 5.6E+04                               | 5.6E+04 | 5.6E+04 | 21.7            | 8                     | 1         | 1         | 1        | 1         | ALDEHYDE DEHYDROGENASE, MITOCHONDRIAL PRECURSOR.; MITOCHONDRIAL ALDEHYDE DEHYDROGENASE 2 VARIANT (FRAGMENT).                                                                                                                                                                                                                                                                                                                                                                                                                      | Q95373; Q1RMF7; Q9H177; Q9NTE3                                                                                                                                                                                  | ALDH2_HUMAN; Q53FB6_HUMAN; Q9UN17_HUMAN                                                                                                                                                                                                                                                                                                     |
| 41                         | IPI00007052                                                                                            | FIS1                 | 152                                  | 152  | 152  | 1.7E+04                               | 1.7E+04 | 1.7E+04 | 15.8            | 2                     | 1         | 0         | 1        | 1         | MITOCHONDRIAL FISSION 1 PROTEIN.                                                                                                                                                                                                                                                                                                                                                                                                                                                                                                  | Q9BT33; Q9Y3D6                                                                                                                                                                                                  | FIS1_HUMAN                                                                                                                                                                                                                                                                                                                                  |
| 42                         | IPI00007402; IPI00784008                                                                               | IPO7                 | 1038                                 | 1040 | 1039 | 1.2E+05                               | 1.2E+05 | 1.2E+05 | 5.3             | 4                     | 1         | 1         | 1        | 0         | 120 KDA PROTEIN.; IMPORTIN-7.                                                                                                                                                                                                                                                                                                                                                                                                                                                                                                     | P48047; Q53HH2; Q5U042; Q61B12                                                                                                                                                                                  | ; IPO7_HUMAN                                                                                                                                                                                                                                                                                                                                |
| 43                         | IPI00007611                                                                                            | ATP5O                | 213                                  | 213  | 213  | 2.3E+04                               | 2.3E+04 | 2.3E+04 | 35.2            | 6                     | 1         | 1         | 1        | 1         | ATP SYNTHASE O SUBUNIT, MITOCHONDRIAL PRECURSOR.                                                                                                                                                                                                                                                                                                                                                                                                                                                                                  | Q498C3; Q5T1J5; Q6NZ50; Q9Y6H1                                                                                                                                                                                  | ATPO_HUMAN; Q53HH2_HUMAN                                                                                                                                                                                                                                                                                                                    |
| 44                         | IPI00007673; IPI00401259                                                                               | CHCH2; CHCHD1        | 151                                  | 151  | 151  | 1.5E+04                               | 1.6E+04 | 1.6E+04 | 18.5            | 2                     | 0         | 0         | 1        | 0         | COILED-COIL-HELIX; COILED-COIL-HELIX DOMAIN-CONTAINING PROTEIN 2.; COILED-COIL-HELIX-COILED-COIL-HELIX DOMAIN-CONTAINING PROTEIN 9.                                                                                                                                                                                                                                                                                                                                                                                               | P54652; Q15508; Q53XM3; Q9UE78                                                                                                                                                                                  | CHCH2_HUMAN; Q5T1J5_HUMAN                                                                                                                                                                                                                                                                                                                   |
| 45                         | IPI00007702                                                                                            | HSPA2                | 639                                  | 639  | 639  | 7.0E+04                               | 7.0E+04 | 7.0E+04 | 32.9            | 19                    | 1         | 1         | 1        | 1         | HEAT SHOCK-RELATED 70 KDA PROTEIN 2.                                                                                                                                                                                                                                                                                                                                                                                                                                                                                              | P05215; P68366                                                                                                                                                                                                  | HSP72_HUMAN; Q53XM3_HUMAN                                                                                                                                                                                                                                                                                                                   |
| 46                         | IPI00007750; IPI00794663                                                                               | TUBA4A               | 433                                  | 448  | 441  | 4.8E+04                               | 5.0E+04 | 4.9E+04 | 37.7            | 12                    | 1         | 1         | 1        | 1         | TUBULIN ALPHA-1 CHAIN.; 48 KDA PROTEIN.                                                                                                                                                                                                                                                                                                                                                                                                                                                                                           | A2BFA2; P05217; P68371; Q81WP6; Q81Z29; Q8N6N5; A1XP52; P30036; P31932; P38646; Q1HB43; Q2F839; Q6GLU03; Q8N1C8; Q9BWB7                                                                                         | TBA1_HUMAN; A2BFA2_HUMAN; Q81WP6_HUMAN; Q81Z29_HUMAN; Q8N6N5_HUMAN; Q96HX0_HUMAN; TBB2C_HUMAN                                                                                                                                                                                                                                               |
| 47                         | IPI00007752                                                                                            | TUBB2C               | 445                                  | 445  | 445  | 5.0E+04                               | 5.0E+04 | 5.0E+04 | 51.2            | 20                    | 1         | 1         | 1        | 1         | TUBULIN BETA-2C CHAIN.                                                                                                                                                                                                                                                                                                                                                                                                                                                                                                            | Q9UKX2                                                                                                                                                                                                          | TUBB2C_HUMAN                                                                                                                                                                                                                                                                                                                                |
| 48                         | IPI00007765                                                                                            | HSPA9                | 679                                  | 679  | 679  | 7.4E+04                               | 7.4E+04 | 7.4E+04 | 37.6            | 19                    | 1         | 1         | 1        | 1         | STRESS-70 PROTEIN, MITOCHONDRIAL PRECURSOR.                                                                                                                                                                                                                                                                                                                                                                                                                                                                                       | Q9BWB7; A0AVL4; Q14322; Q16229; Q86T56; Q9UKX2                                                                                                                                                                  | Q9BWB7_HUMAN; Q9UKX2_HUMAN                                                                                                                                                                                                                                                                                                                  |
| 49                         | IPI00007856                                                                                            | MYH2                 | 1941                                 | 1941 | 1941 | 2.2E+05                               | 2.2E+05 | 2.2E+05 | 65.3            | 253                   | 1         | 1         | 1        | 1         | MYOSIN-2.                                                                                                                                                                                                                                                                                                                                                                                                                                                                                                                         | P48163; Q16797; Q16855; Q53F72; Q5VWA2; Q8WYX2; Q9BWX8; Q9H1W3; Q9UIY4                                                                                                                                          | MYH2_HUMAN; Q86T56_HUMAN                                                                                                                                                                                                                                                                                                                    |
| 50                         | IPI00007926                                                                                            | C6orf108             | 174                                  | 174  | 174  | 1.9E+04                               | 1.9E+04 | 1.9E+04 | 20.1            | 2                     | 0         | 0         | 1        | 0         | C-MYC-RESPONSIVE PROTEIN RCL.                                                                                                                                                                                                                                                                                                                                                                                                                                                                                                     | Q43598                                                                                                                                                                                                          | RCL_HUMAN                                                                                                                                                                                                                                                                                                                                   |
| 51                         | IPI00008215                                                                                            | ME1                  | 572                                  | 572  | 572  | 6.4E+04                               | 6.4E+04 | 6.4E+04 | 7.5             | 3                     | 1         | 1         | 1        | 0         | NADP-DEPENDENT MALIC ENZYME.                                                                                                                                                                                                                                                                                                                                                                                                                                                                                                      | Q502X2; Q53HB7; Q96LV0; Q9BT11; Q9HVA6; Q9NR28                                                                                                                                                                  | MAOX_HUMAN; Q8WVX2_HUMAN                                                                                                                                                                                                                                                                                                                    |
| 52                         | IPI00008418; IPI00219865; IPI00789460; IPI00794003                                                     | DIABLO               | 157                                  | 239  | 187  | 1.8E+04                               | 2.7E+04 | 2.1E+04 | 14.6            | 3                     | 0         | 0         | 1        | 1         | ISOFORM 1 OF DIABLO HOMOLOG, MITOCHONDRIAL PRECURSOR.; ISOFORM 2 OF DIABLO HOMOLOG, MITOCHONDRIAL PRECURSOR.; 19 KDA PROTEIN.; 18 KDA PROTEIN.                                                                                                                                                                                                                                                                                                                                                                                    | Q502X2; Q53HB7; Q96LV0; Q9BT11; Q9HVA6; Q9NR28; P21399; Q14652; Q5VZA7; Q9HBB2                                                                                                                                  | ; DBLO_HUMAN; Q502X2_HUMAN; Q53HB7_HUMAN; IREB1_HUMAN; Q5VZA7_HUMAN; Q9HBB2_HUMAN                                                                                                                                                                                                                                                           |
| 53                         | IPI00008485                                                                                            | ACO1                 | 889                                  | 889  | 889  | 9.8E+04                               | 9.8E+04 | 9.8E+04 | 10.0            | 5                     | 1         | 1         | 1        | 1         | IRON-RESPONSIVE ELEMENT-BINDING PROTEIN 1.                                                                                                                                                                                                                                                                                                                                                                                                                                                                                        | Q5VZA7; Q9HBB2                                                                                                                                                                                                  | ACO1_HUMAN                                                                                                                                                                                                                                                                                                                                  |



| Protein Group* | IPI ID                                                          | IPI gene name    | Amino Acids in Sequence <sup>1</sup> |      |      | Protein Molecular Weight <sup>1</sup> |         |         | Seq. Cov. (max) | Unique Peptides (max) | Detection |           |          |           | Protein name                                                                                                                                                                                             | Uniprot Id                                                                                                                                                                                                     | Uniprot Entry Name                                                                                                                                      |
|----------------|-----------------------------------------------------------------|------------------|--------------------------------------|------|------|---------------------------------------|---------|---------|-----------------|-----------------------|-----------|-----------|----------|-----------|----------------------------------------------------------------------------------------------------------------------------------------------------------------------------------------------------------|----------------------------------------------------------------------------------------------------------------------------------------------------------------------------------------------------------------|---------------------------------------------------------------------------------------------------------------------------------------------------------|
|                |                                                                 |                  | Min.                                 | Max. | Mean | Min.                                  | Max.    | Mean    |                 |                       | Expt. I-1 | Expt. I-2 | Expt. II | Expt. III |                                                                                                                                                                                                          |                                                                                                                                                                                                                |                                                                                                                                                         |
| 83             | IPI00012726; IPI00555747; IPI00642904; IPI00642944              | PABPC4           | 615                                  | 660  | 638  | 6.8E+04                               | 7.2E+04 | 7.0E+04 | 12.2            | 5                     | 1         | 1         | 1        | 1         | ISOFORM 1 OF POLYADENYLATE-BINDING PROTEIN 4.; ISOFORM 2 OF POLYADENYLATE-BINDING PROTEIN 4.; POLY(A) BINDING PROTEIN, CYTOPLASMIC 4.; POLY(A) BINDING PROTEIN, CYTOPLASMIC 4.                           | Q13310; Q147Y3; Q15164; Q38867; Q53GL4; Q59GZ7; Q5SP54; Q5SP55; Q5SP56; Q5T3B4; Q6IQ30; Q6P0N3; P33121; P41215; Q108N1; Q8N8V7; Q8TA99                                                                         | PABP4_HUMAN; Q147Y3_HUMAN; Q15164_HUMAN; Q38867_HUMAN; Q53GL4_HUMAN; Q59GZ7_HUMAN; Q5SP54_HUMAN; Q5SP55_HUMAN; Q5SP56_HUMAN; Q5T3B4_HUMAN; Q6IQ30_HUMAN |
| 84             | IPI00012728                                                     | ACSL1            | 698                                  | 698  | 698  | 7.8E+04                               | 7.8E+04 | 7.8E+04 | 29.9            | 19                    | 1         | 1         | 1        | 1         | ISOFORM 1 OF LONG-CHAIN-FATTY-ACID-COA LIGASE 1. 40S RIBOSOMAL PROTEIN S25.; SIMILAR TO 40S RIBOSOMAL PROTEIN S25.; 14 KDA PROTEIN.; SIMILAR TO 40S RIBOSOMAL PROTEIN S25.                               | P23786; Q53G79; Q5SW68; Q9B026                                                                                                                                                                                 | ACSL1_HUMAN; Q108N1_HUMAN                                                                                                                               |
| 85             | IPI00012750; IPI00401105; IPI00478694; IPI00740757              | RPS25; hCG_1640  | 124                                  | 125  | 124  | 1.4E+04                               | 1.4E+04 | 1.4E+04 | 24.0            | 3                     | 0         | 0         | 1        | 1         | RIBOSOMAL PROTEIN S25. CARNITINE O-PALMITOYLTRANSFERASE 2, MITOCHONDRIAL PRECURSOR.                                                                                                                      | P25111; P62851                                                                                                                                                                                                 | ; RS25_HUMAN                                                                                                                                            |
| 86             | IPI00012912                                                     | CPT2             | 658                                  | 658  | 658  | 7.4E+04                               | 7.4E+04 | 7.4E+04 | 17.5            | 8                     | 1         | 1         | 1        | 0         | MITOCHONDRIAL PRECURSOR. NADH DEHYDROGENASE [UBIQUINONE] 1 BETA SUBCOMPLEX SUBUNIT 5, MITOCHONDRIAL PRECURSOR.; NDUFB5 PROTEIN.; 22 KDA PROTEIN. PEPTIDYL-PROLYL CIS-TRANS ISOMERASE NIMA-INTERACTING 1. | Q43674; Q05D62; Q561V6; Q13526; Q53X75; Q8NFL2; Q53F58; Q9BC7                                                                                                                                                  | CPT2_HUMAN; Q53G79_HUMAN; NDUFB5_HUMAN; Q05D62_HUMAN; Q561V6_HUMAN; PIN1_HUMAN; Q53X75_HUMAN; Q8NFL2_HUMAN; Q53F58_HUMAN; Q9BC7_HUMAN                   |
| 87             | IPI00013459; IPI00556190; IPI00791036                           | NDUFB5           | 137                                  | 189  | 171  | 1.6E+04                               | 2.2E+04 | 2.0E+04 | 12.2            | 3                     | 0         | 0         | 1        | 1         | UBIQUINOL-CYTOCHROME-C REDUCTASE COMPLEX CORE PROTEIN 1, MITOCHONDRIAL PRECURSOR. 3-HYDROXYISOBUTYRATE DEHYDROGENASE, MITOCHONDRIAL PRECURSOR.; HYPOTHETICAL PROTEIN (FRAGMENT).                         | P31930; Q96DD2                                                                                                                                                                                                 | UOCR1_HUMAN                                                                                                                                             |
| 88             | IPI00013723                                                     | PIN1             | 163                                  | 163  | 163  | 1.8E+04                               | 1.8E+04 | 1.8E+04 | 25.8            | 3                     | 0         | 0         | 1        | 0         | INTERACTING 1.                                                                                                                                                                                           | Q43674; Q05D62; Q561V6; Q13526; Q53X75; Q8NFL2; Q53F58; Q9BC7                                                                                                                                                  | ; NDUFB5_HUMAN; Q05D62_HUMAN; Q561V6_HUMAN; PIN1_HUMAN; Q53X75_HUMAN; Q8NFL2_HUMAN; Q53F58_HUMAN; Q9BC7_HUMAN                                           |
| 89             | IPI00013745                                                     | PLCD4            | 763                                  | 763  | 763  | 8.8E+04                               | 8.8E+04 | 8.8E+04 | 13.4            | 6                     | 1         | 1         | 1        | 1         | PHOSPHOLIPASE C DELTA 4.                                                                                                                                                                                 | P31930; Q96DD2                                                                                                                                                                                                 | UOCR1_HUMAN                                                                                                                                             |
| 90             | IPI00013847                                                     | UQCR1            | 480                                  | 480  | 480  | 5.3E+04                               | 5.3E+04 | 5.3E+04 | 27.7            | 11                    | 1         | 1         | 1        | 1         | UBIQUINOL-CYTOCHROME-C REDUCTASE COMPLEX CORE PROTEIN 1, MITOCHONDRIAL PRECURSOR. 3-HYDROXYISOBUTYRATE DEHYDROGENASE, MITOCHONDRIAL PRECURSOR.; HYPOTHETICAL PROTEIN (FRAGMENT).                         | P31930; Q96DD2                                                                                                                                                                                                 | UOCR1_HUMAN                                                                                                                                             |
| 91             | IPI00013860; IPI00479966                                        | HIBADH           | 336                                  | 360  | 348  | 3.5E+04                               | 3.8E+04 | 3.7E+04 | 21.7            | 5                     | 1         | 1         | 1        | 1         | STRESS-INDUCED-PHOSPHOPROTEIN 1.                                                                                                                                                                         | P31937; Q546Z2; Q9LUD3                                                                                                                                                                                         | ; 3HIDH_HUMAN; Q546Z2_HUMAN                                                                                                                             |
| 92             | IPI00013894                                                     | STIP1            | 543                                  | 543  | 543  | 6.3E+04                               | 6.3E+04 | 6.3E+04 | 17.3            | 10                    | 1         | 1         | 1        | 1         | STRESS-INDUCED-PHOSPHOPROTEIN 1.                                                                                                                                                                         | P31948; Q5TJ09; O75993; P15924; Q14189; Q9UHN4; P06468; P07951; Q13894; Q53FM4; Q5TCU4; Q5TCU7; Q9JH67                                                                                                         | STIP1_HUMAN; Q5TJ09_HUMAN; STIP1_HUMAN                                                                                                                  |
| 93             | IPI00013933                                                     | DSP              | 2871                                 | 2871 | 2871 | 3.3E+05                               | 3.3E+05 | 3.3E+05 | 1.7             | 4                     | 0         | 0         | 1        | 1         | ISOFORM DPI OF DESMOPLAKIN.                                                                                                                                                                              | O75993; P15924; Q14189; Q9UHN4; P06468; P07951; Q13894; Q53FM4; Q5TCU4; Q5TCU7; Q9JH67; Q53F17                                                                                                                 | DESP_HUMAN                                                                                                                                              |
| 94             | IPI00013991                                                     | TPM2             | 284                                  | 284  | 284  | 3.3E+04                               | 3.3E+04 | 3.3E+04 | 65.5            | 31                    | 1         | 1         | 1        | 1         | ISOFORM 1 OF TROPOMYOSIN BETA CHAIN.                                                                                                                                                                     | P10469; Q6DV89; Q88W64; Q5TC04; Q96IK2; Q9UCY9; Q15124; Q5VYV3; Q8N527; P17540; Q6ICS8; Q8N1E1; Q9H511                                                                                                         | TPM2_HUMAN; Q53F17_HUMAN                                                                                                                                |
| 95             | IPI00014398                                                     | FHL1             | 296                                  | 296  | 296  | 3.4E+04                               | 3.4E+04 | 3.4E+04 | 17.6            | 6                     | 1         | 1         | 1        | 1         | FOUR AND A HALF LIM DOMAINS 1 VARIANT.                                                                                                                                                                   | Q13643; Q6I9T0; Q96C98; Q9BVA2; Q9P100; P54266; Q05639; Q0VGC7; P09417; Q53F52; Q9H3M5; P09493; P09494; P10469; Q6DV89; Q88W64; Q5TC04; Q96IK2; Q9UCY9; Q15124; Q5VYV3; Q8N527; P17540; Q6ICS8; Q8N1E1; Q9H511 | TPM2_HUMAN; Q53F17_HUMAN; FHL3_HUMAN; Q6I9T0_HUMAN; Q96C98_HUMAN; Q9BVA2_HUMAN; Q9P100_HUMAN                                                            |
| 96             | IPI00014399                                                     | FHL3             | 280                                  | 280  | 280  | 3.1E+04                               | 3.1E+04 | 3.1E+04 | 6.1             | 2                     | 0         | 0         | 1        | 1         | FOUR AND A HALF LIM DOMAINS PROTEIN 3.                                                                                                                                                                   | Q9P100; P54266; Q05639; Q0VGC7; P09417; Q53F52; Q9H3M5; P09493; P09494; P10469; Q6DV89; Q88W64; Q5TC04; Q96IK2; Q9UCY9; Q15124; Q5VYV3; Q8N527; P17540; Q6ICS8; Q8N1E1; Q9H511                                 | TPM2_HUMAN; Q53F17_HUMAN; FHL3_HUMAN; Q6I9T0_HUMAN; Q96C98_HUMAN; Q9BVA2_HUMAN; Q9P100_HUMAN                                                            |
| 97             | IPI00014424                                                     | EEF1A2           | 463                                  | 463  | 463  | 5.0E+04                               | 5.0E+04 | 5.0E+04 | 32.0            | 15                    | 1         | 1         | 1        | 1         | ELONGATION FACTOR 1-ALPHA 2.                                                                                                                                                                             | P09417; Q53F52; Q9H3M5; P09493; P09494; P10469; Q6DV89; Q88W64; Q5TC04; Q96IK2; Q9UCY9; Q15124; Q5VYV3; Q8N527; P17540; Q6ICS8; Q8N1E1; Q9H511                                                                 | EEF1A2_HUMAN                                                                                                                                            |
| 98             | IPI00014439                                                     | QDPR             | 244                                  | 244  | 244  | 2.6E+04                               | 2.6E+04 | 2.6E+04 | 21.3            | 3                     | 0         | 0         | 1        | 1         | DIHYDROPTERIDINE REDUCTASE.                                                                                                                                                                              | P09417; Q53F52; Q9H3M5; P09493; P09494; P10469; Q6DV89; Q88W64; Q5TC04; Q96IK2; Q9UCY9; Q15124; Q5VYV3; Q8N527; P17540; Q6ICS8; Q8N1E1; Q9H511                                                                 | DHPR_HUMAN                                                                                                                                              |
| 99             | IPI00014581; IPI00296039                                        | TPM1             | 284                                  | 284  | 284  | 3.3E+04                               | 3.3E+04 | 3.3E+04 | 78.9            | 37                    | 1         | 1         | 1        | 1         | ISOFORM 1 OF TROPOMYOSIN-1 ALPHA CHAIN.; ISOFORM 4 OF TROPOMYOSIN-1 ALPHA CHAIN.                                                                                                                         | P10469; Q6DV89; Q88W64; Q5TC04; Q96IK2; Q9UCY9; Q15124; Q5VYV3; Q8N527; P17540; Q6ICS8; Q8N1E1; Q9H511                                                                                                         | Q6DV89_HUMAN; Q8TCG4_HUMAN; TPM1_HUMAN; PGM5_HUMAN; Q5VYV3_HUMAN; Q8N527_HUMAN                                                                          |
| 100            | IPI00014852                                                     | PGM5             | 506                                  | 506  | 506  | 5.6E+04                               | 5.6E+04 | 5.6E+04 | 13.4            | 5                     | 1         | 1         | 1        | 1         | PHOSPHOGLUCOMUTASE-LIKE PROTEIN 5. CREATINE KINASE, SARCOMERIC MITOCHONDRIAL PRECURSOR.                                                                                                                  | Q8N1E1; Q9H511                                                                                                                                                                                                 | KCRS_HUMAN; KLH31_HUMAN                                                                                                                                 |
| 101            | IPI00015141                                                     | CKMT2            | 419                                  | 419  | 419  | 4.8E+04                               | 4.8E+04 | 4.8E+04 | 41.8            | 22                    | 1         | 1         | 1        | 1         | COILED-COIL-HELIX-COILED-COIL-HELIX DOMAIN-CONTAINING PROTEIN 3.                                                                                                                                         | Q9NX63; Q53G94; Q6IAB8; Q88Y47; Q9NX46; P09622; Q14131; Q14167; Q59EV8; Q8WTS4                                                                                                                                 | CHCH3_HUMAN                                                                                                                                             |
| 102            | IPI00015421                                                     | KLHL31           | 634                                  | 634  | 634  | 7.0E+04                               | 7.0E+04 | 7.0E+04 | 3.8             | 2                     | 1         | 0         | 1        | 0         | KELCH-LIKE PROTEIN 31.                                                                                                                                                                                   | Q9NX63; Q53G94; Q6IAB8; Q88Y47; Q9NX46; P09622; Q14131; Q14167; Q59EV8; Q8WTS4                                                                                                                                 | CHCH3_HUMAN                                                                                                                                             |
| 103            | IPI00015833                                                     | CHCHD3           | 227                                  | 227  | 227  | 2.6E+04                               | 2.6E+04 | 2.6E+04 | 16.3            | 6                     | 0         | 0         | 1        | 1         | COILED-COIL-HELIX-COILED-COIL-HELIX DOMAIN-CONTAINING PROTEIN 3.                                                                                                                                         | Q9NX63; Q53G94; Q6IAB8; Q88Y47; Q9NX46; P09622; Q14131; Q14167; Q59EV8; Q8WTS4                                                                                                                                 | CHCH3_HUMAN                                                                                                                                             |
| 104            | IPI00015865                                                     | ADPRHL2          | 363                                  | 363  | 363  | 3.9E+04                               | 3.9E+04 | 3.9E+04 | 11.6            | 3                     | 1         | 1         | 1        | 1         | POLY(ADP-RIBOSE) GLYCOHYDROLASE ARH3.                                                                                                                                                                    | Q9NX63; Q53G94; Q6IAB8; Q88Y47; Q9NX46; P09622; Q14131; Q14167; Q59EV8; Q8WTS4                                                                                                                                 | ARHL2_HUMAN                                                                                                                                             |
| 105            | IPI00015911                                                     | DLD              | 509                                  | 509  | 509  | 5.4E+04                               | 5.4E+04 | 5.4E+04 | 24.2            | 9                     | 1         | 1         | 1        | 1         | DIHYDROLIPOYL DEHYDROGENASE, MITOCHONDRIAL PRECURSOR.                                                                                                                                                    | Q14167; Q59EV8; Q8WTS4                                                                                                                                                                                         | DLD_HUMAN; Q59EV8_HUMAN; Q8WTS4_HUMAN                                                                                                                   |
| 106            | IPI00015972                                                     | COX6C            | 75                                   | 75   | 75   | 8.8E+03                               | 8.8E+03 | 8.8E+03 | 37.3            | 5                     | 0         | 0         | 1        | 1         | CYTOCHROME C OXIDASE POLYPEPTIDE VIC PRECURSOR.                                                                                                                                                          | P09669; Q96KU4; Q9H4E9; Q9NXQ3; Q9P2G2; Q43801; O75323; Q53X96                                                                                                                                                 | COX6C_HUMAN                                                                                                                                             |
| 107            | IPI00016006; IPI00184477; IPI00797784                           | GPHN             | 380                                  | 769  | 628  | 4.1E+04                               | 8.3E+04 | 6.8E+04 | 4.2             | 2                     | 0         | 0         | 1        | 0         | ISOFORM 1 OF GEPHYRIN.; ISOFORM 2 OF GEPHYRIN.; 41 KDA PROTEIN.                                                                                                                                          | Q96KU4; Q9H4E9; Q9NXQ3; Q9P2G2; Q43801; O75323; Q53X96                                                                                                                                                         | ; GEPH_HUMAN; Q96KU4_HUMAN                                                                                                                              |
| 108            | IPI00016077; IPI00016342; IPI00791850; IPI00792578; IPI00795370 | GBAS             | 286                                  | 286  | 286  | 3.4E+04                               | 3.4E+04 | 3.4E+04 | 23.4            | 4                     | 1         | 1         | 1        | 1         | PROTEIN NIPSNAP2. RAS-RELATED PROTEIN RAB-7.; 9 KDA PROTEIN.; 11 KDA PROTEIN.; 9 KDA PROTEIN.                                                                                                            | Q43801; O75323; Q53X96                                                                                                                                                                                         | NIPS2_HUMAN; Q53X96_HUMAN                                                                                                                               |
| 109            | IPI00795370                                                     | RAB7A            | 78                                   | 207  | 116  | 8.7E+03                               | 2.3E+04 | 1.3E+04 | 17.9            | 3                     | 0         | 0         | 1        | 1         | PROLINE SYNTHETASE CO-TRANSCRIBED BACTERIAL HOMOLOG PROTEIN.                                                                                                                                             | O94903; Q6FI94                                                                                                                                                                                                 | PROSC_HUMAN                                                                                                                                             |
| 110            | IPI00016346                                                     | PROSC            | 275                                  | 275  | 275  | 3.0E+04                               | 3.0E+04 | 3.0E+04 | 9.5             | 2                     | 0         | 0         | 1        | 0         | ISOFORM 1 OF CARNITINE O-ACETYLTRANSFERASE.; ISOFORM 3 OF CARNITINE O-ACETYLTRANSFERASE.; ISOFORM 2 OF CARNITINE O-ACETYLTRANSFERASE.                                                                    | P43155; Q5T952; Q9BW16; O88386; P61026; Q53SX4; Q53T70; Q6IA52; Q9D7X6; Q9H073; Q9UL28                                                                                                                         | ; CACP_HUMAN; Q5T952_HUMAN                                                                                                                              |
| 111            | IPI00016457; IPI00029140; IPI00514595                           | CRAT             | 548                                  | 626  | 593  | 6.2E+04                               | 7.1E+04 | 6.7E+04 | 23.6            | 11                    | 1         | 1         | 1        | 1         | ISOFORM 1 OF CARNITINE O-ACETYLTRANSFERASE.; ISOFORM 3 OF CARNITINE O-ACETYLTRANSFERASE.; ISOFORM 2 OF CARNITINE O-ACETYLTRANSFERASE.                                                                    | P43155; Q5T952; Q9BW16; O88386; P61026; Q53SX4; Q53T70; Q6IA52; Q9D7X6; Q9H073; Q9UL28                                                                                                                         | ; CACP_HUMAN; Q5T952_HUMAN                                                                                                                              |
| 112            | IPI00016513                                                     | RAB10            | 200                                  | 200  | 200  | 2.3E+04                               | 2.3E+04 | 2.3E+04 | 28.5            | 4                     | 0         | 0         | 1        | 1         | RAS-RELATED PROTEIN RAB-10. ISOFORM MITOCHONDRIAL OF GLUTATHIONE REDUCTASE, MITOCHONDRIAL PRECURSOR.; ISOFORM CYTOPLASMIC OF GLUTATHIONE REDUCTASE, MITOCHONDRIAL PRECURSOR.                             | P00390; Q03504; Q7Z5C9; Q9NP63                                                                                                                                                                                 | Q53SX4_HUMAN; Q53T70_HUMAN; Q9UL28_HUMAN; RAB10_HUMAN                                                                                                   |
| 113            | IPI00016862; IPI00759575                                        | GSR              | 479                                  | 522  | 501  | 5.2E+04                               | 5.6E+04 | 5.4E+04 | 10.5            | 3                     | 1         | 1         | 1        | 1         | MITOCHONDRIAL PRECURSOR. EUKARYOTIC TRANSLATION INITIATION FACTOR 3 SUBUNIT 8.; SIMILAR TO EUKARYOTIC TRANSLATION INITIATION FACTOR 3, SUBUNIT 8, 110KDA ISOFORM 1.                                      | P00390; Q03504; Q7Z5C9; Q9NP63; A1KYQ7; Q00215; Q3B7B9; Q99613                                                                                                                                                 | GSHR_HUMAN; Q03504_HUMAN                                                                                                                                |
| 114            | IPI00016910; IPI00646839                                        | EIF3S8; LOC72866 | 913                                  | 914  | 914  | 1.1E+05                               | 1.1E+05 | 1.1E+05 | 6.5             | 5                     | 1         | 1         | 1        | 1         | EIF3S8; LOC72866                                                                                                                                                                                         | A1KYQ7; Q00215; Q3B7B9; Q99613                                                                                                                                                                                 | ; A1KYQ7_HUMAN; IF38_HUMAN; Q3B7B9_HUMAN                                                                                                                |

| Protein Group <sup>a</sup> | IPI ID                                                                                    | IPI gene name   | Amino Acids in Sequence <sup>b</sup> |      |      | Protein Molecular Weight <sup>c</sup> |         |         | Seq. Cov. (max) | Unique Peptides (max) | Detection |           |          |           | Protein name                                                                                                                                                                                                                               | Uniprot Id                                                                                                                                                                                                                                                                                                                                                                                                                                                                                                                                                                                                                                                                                                                                                                                                                                                                                                                                                                                                                                                    | Uniprot Entry Name                     |
|----------------------------|-------------------------------------------------------------------------------------------|-----------------|--------------------------------------|------|------|---------------------------------------|---------|---------|-----------------|-----------------------|-----------|-----------|----------|-----------|--------------------------------------------------------------------------------------------------------------------------------------------------------------------------------------------------------------------------------------------|---------------------------------------------------------------------------------------------------------------------------------------------------------------------------------------------------------------------------------------------------------------------------------------------------------------------------------------------------------------------------------------------------------------------------------------------------------------------------------------------------------------------------------------------------------------------------------------------------------------------------------------------------------------------------------------------------------------------------------------------------------------------------------------------------------------------------------------------------------------------------------------------------------------------------------------------------------------------------------------------------------------------------------------------------------------|----------------------------------------|
|                            |                                                                                           |                 | Min.                                 | Max. | Mean | Min.                                  | Max.    | Mean    |                 |                       | Expt. I-1 | Expt. I-2 | Expt. II | Expt. III |                                                                                                                                                                                                                                            |                                                                                                                                                                                                                                                                                                                                                                                                                                                                                                                                                                                                                                                                                                                                                                                                                                                                                                                                                                                                                                                               |                                        |
| 115                        | IPI00017283                                                                               | IARS2           | 1012                                 | 1012 | 1012 | 1.1E+05                               | 1.1E+05 | 1.1E+05 | 8.3             | 6                     | 1         | 1         | 1        | 1         | ISOLEUCYL-TRNA SYNTHETASE, MITOCHONDRIAL PRECURSOR.                                                                                                                                                                                        | Q1M2P9; Q6P185; Q7L439; Q86WU9; Q8SD91; Q9H9Q8; Q9NSE4 P35232; Q4VB00; Q53FV0; Q6FHP5; Q6PUJ7 P35241; Q05CU6; Q6PKD3; Q86Y61; Q9NST9 A0S3D8; A0SA07; A1Z455; A1Z4V2; P00403; Q06TE6; Q09U41; Q0Z7D6; Q0Z7F1; Q0Z7J0; Q0Z7K3; Q0Z7S0; Q14X13; Q14XT3; Q15HH9; Q19MP7; Q2QDD3; Q305H0; Q37526; Q4EYL1; Q4EZD4; Q4F4V6; Q4F6A2; Q4GC22; Q4GC24; Q4GHE1; Q4GQPO; Q4GVPS; Q4GW12; Q4R1L3; Q4R1L5; Q5S971; Q5SA98; Q5SAP1; Q5SB08; Q5XRW8; Q6ROV6; Q6RKW8; Q6RNN7; Q6RQ80; Q6VIG7; Q6VJD8; Q6VJJ3; Q7GXZ8; Q7Y626; Q7Y6M3; Q7Y6N0; Q7YCE6; Q7YEH2; Q85KR6; Q85KS0; Q85KS5; Q85KS8; Q85KT6; Q85KV5; Q85KW8; Q85KX8; Q85L00; Q86WE9; Q8HNR1; Q8HNR6; Q8HOB7; Q8HNR3; Q8HQB7; Q8WCW3; Q8H927; Q6IBS9; Q8TCV9; Q96H05; Q99714 A2A274; Q75809; Q5JZ41; Q6FHX0; Q71UF1; Q8TAQ6; Q99798 P00505; Q53FL3; Q9BWA3 Q43443; Q43444; Q75574; P19367; P78542; Q59FD4; Q5VTC3; Q5VTC4; Q5VTC5; Q5VTC6; Q71V75; Q96HC8; Q9NNZ4; Q9NNZ5 P00568; Q53EY8; Q5T9B7; Q6FGX9; Q9BVK9; Q9UQC7 P17980; Q3B757; Q38865; Q53HU5; Q6PFS8; Q6IBS1; Q96HD3 Q14871; Q53HV2; Q6FI28; Q6IBT3; Q99832 | Q1M2P9_HUMAN; Q9H9Q8_HUMAN; SYIM_HUMAN |
| 116                        | IPI00017334; IPI00791634                                                                  | PHB             | 272                                  | 272  | 272  | 3.0E+04                               | 3.0E+04 | 3.0E+04 | 29.4            | 7                     | 1         | 0         | 1        | 1         | PROHIBITIN.; PROHIBITIN VARIANT (FRAGMENT).                                                                                                                                                                                                | PHB_HUMAN; Q53FV0_HUMAN; Q6FHP5_HUMAN; Q6PUJ7_HUMAN                                                                                                                                                                                                                                                                                                                                                                                                                                                                                                                                                                                                                                                                                                                                                                                                                                                                                                                                                                                                           |                                        |
| 117                        | IPI00017367                                                                               | RDX             | 583                                  | 583  | 583  | 6.9E+04                               | 6.9E+04 | 6.9E+04 | 19.6            | 9                     | 1         | 1         | 1        | 1         | RADIXIN.                                                                                                                                                                                                                                   | Q05CU6_HUMAN; Q6PKD3_HUMAN; Q9NST9_HUMAN; RAD1_HUMAN A0S3D8_HUMAN; A0SA07_HUMAN; A1Z455_HUMAN; A1Z4V2_HUMAN; COX2_HUMAN; Q06TE6_HUMAN; Q09U41_HUMAN; Q0Z7D6_HUMAN; Q0Z7F1_HUMAN; Q0Z7J0_HUMAN; Q0Z7K3_HUMAN; Q0Z7S0_HUMAN; Q14X13_HUMAN; Q14XT3_HUMAN; Q15HH9_HUMAN; Q19MP7_HUMAN; Q305H0_HUMAN; Q4EYL1_HUMAN; Q4EZD4_HUMAN; Q4F4V6_HUMAN; Q4F6A2_HUMAN; Q4GCC3_HUMAN; Q4GCG2_HUMAN; Q4GC24_HUMAN; Q4GHE1_HUMAN; Q4GQPO_HUMAN; Q4GVPS_HUMAN; Q4GW12_HUMAN; Q4R1L3_HUMAN; Q4R1L5_HUMAN; Q5S971_HUMAN; Q5SA98_HUMAN; Q5SAP1_HUMAN; Q5SB08_HUMAN; Q5XRW8_HUMAN; Q6ROV6_HUMAN; Q6RKW8_HUMAN; Q6RNN7_HUMAN; Q6RQ80_HUMAN; Q6VIG7_HUMAN; Q6VJD8_HUMAN; Q6VJJ3_HUMAN; Q7GXZ8_HUMAN; Q7Y626_HUMAN; Q7Y6M3_HUMAN; Q7Y6N0_HUMAN; Q7YCE6_HUMAN; Q7YEH2_HUMAN; Q85KR6_HUMAN; Q85KS0_HUMAN; Q85KS5_HUMAN; Q85KS8_HUMAN; Q85KT6_HUMAN; Q85KV5_HUMAN; Q85KW8_HUMAN; Q85KX8_HUMAN; Q85L00_HUMAN; Q86WE9_HUMAN; Q8HNR1_HUMAN; Q8HNR6_HUMAN; Q8HOB7_HUMAN; Q8WCW3_HUMAN; Q9B138_HUMAN; Q9B1F9_HUMAN; HCD2_HUMAN; Q5H927_HUMAN; Q6IBS9_HUMAN                                     |                                        |
| 118                        | IPI00017510                                                                               | COX2            | 227                                  | 227  | 227  | 2.6E+04                               | 2.6E+04 | 2.6E+04 | 39.2            | 6                     | 1         | 1         | 1        | 1         | CYTOCHROME C OXIDASE SUBUNIT 2.                                                                                                                                                                                                            | Q5H927; Q6IBS9; Q8TCV9; Q96H05; Q99714 A2A274; Q75809; Q5JZ41; Q6FHX0; Q71UF1; Q8TAQ6; Q99798 P00505; Q53FL3; Q9BWA3 Q43443; Q43444; Q75574; P19367; P78542; Q59FD4; Q5VTC3; Q5VTC4; Q5VTC5; Q5VTC6; Q71V75; Q96HC8; Q9NNZ4; Q9NNZ5 P00568; Q53EY8; Q5T9B7; Q6FGX9; Q9BVK9; Q9UQC7 P17980; Q3B757; Q38865; Q53HU5; Q6PFS8; Q6IBS1; Q96HD3 Q14871; Q53HV2; Q6FI28; Q6IBT3; Q99832                                                                                                                                                                                                                                                                                                                                                                                                                                                                                                                                                                                                                                                                              |                                        |
| 119                        | IPI00017726; IPI00336094                                                                  | HSD17B10        | 252                                  | 261  | 257  | 2.6E+04                               | 2.7E+04 | 2.6E+04 | 24.1            | 4                     | 0         | 0         | 1        | 1         | HYDROXYMETHYLGLUTARATE 3-OXIDOREDUCTASE TYPE-2.                                                                                                                                                                                            | HCD2_HUMAN; Q5H927_HUMAN; Q6IBS9_HUMAN                                                                                                                                                                                                                                                                                                                                                                                                                                                                                                                                                                                                                                                                                                                                                                                                                                                                                                                                                                                                                        |                                        |
| 120                        | IPI00017855; IPI00790739                                                                  | ACO2            | 780                                  | 805  | 793  | 8.5E+04                               | 8.8E+04 | 8.7E+04 | 47.3            | 37                    | 1         | 1         | 1        | 1         | ACONITATE HYDRATASE, MITOCHONDRIAL PRECURSOR.; ACONITASE 2, MITOCHONDRIAL.                                                                                                                                                                 | ACON_HUMAN; ACON_HUMAN; Q5JZ41_HUMAN; Q6FHX0_HUMAN; Q71UF1_HUMAN; Q8TAQ6_HUMAN                                                                                                                                                                                                                                                                                                                                                                                                                                                                                                                                                                                                                                                                                                                                                                                                                                                                                                                                                                                |                                        |
| 121                        | IPI00018206                                                                               | GOT2            | 430                                  | 430  | 430  | 4.7E+04                               | 4.7E+04 | 4.7E+04 | 44.2            | 23                    | 1         | 1         | 1        | 1         | ASPARTATE AMINOTRANSFERASE, MITOCHONDRIAL PRECURSOR.                                                                                                                                                                                       | AATM_HUMAN; Q53FL3_HUMAN                                                                                                                                                                                                                                                                                                                                                                                                                                                                                                                                                                                                                                                                                                                                                                                                                                                                                                                                                                                                                                      |                                        |
| 122                        | IPI00018246; IPI00220663; IPI00220665; IPI00220667                                        | HK1             | 905                                  | 921  | 915  | 1.0E+05                               | 1.0E+05 | 1.0E+05 | 20.2            | 18                    | 1         | 1         | 1        | 1         | ISOFORM 1 OF HEXOKINASE-1.; ISOFORM 2 OF HEXOKINASE-1.; ISOFORM 3 OF HEXOKINASE-1.; ISOFORM 4 OF HEXOKINASE-1.                                                                                                                             | HXX1_HUMAN; P78542_HUMAN; Q59FD4_HUMAN; Q5VTC4_HUMAN; Q5VTC5_HUMAN; Q5VTC6_HUMAN; Q71V75_HUMAN                                                                                                                                                                                                                                                                                                                                                                                                                                                                                                                                                                                                                                                                                                                                                                                                                                                                                                                                                                |                                        |
| 123                        | IPI00018342; IPI00640817                                                                  | AK1             | 194                                  | 210  | 202  | 2.2E+04                               | 2.3E+04 | 2.3E+04 | 63.4            | 13                    | 1         | 1         | 1        | 1         | ADENYLATE KINASE ISOENZYME 1.; ADENYLATE KINASE 1.                                                                                                                                                                                         | KAD1_HUMAN; Q53EY8_HUMAN; Q5T9B7_HUMAN; Q6FGX9_HUMAN                                                                                                                                                                                                                                                                                                                                                                                                                                                                                                                                                                                                                                                                                                                                                                                                                                                                                                                                                                                                          |                                        |
| 124                        | IPI00018398                                                                               | PSMC3           | 439                                  | 439  | 439  | 4.9E+04                               | 4.9E+04 | 4.9E+04 | 44.0            | 13                    | 1         | 1         | 1        | 0         | 26S PROTEASE REGULATORY SUBUNIT 6A.                                                                                                                                                                                                        | PR56A_HUMAN; Q3B757_HUMAN; Q53HU5_HUMAN; Q6PGP8_HUMAN; Q6IBS1_HUMAN                                                                                                                                                                                                                                                                                                                                                                                                                                                                                                                                                                                                                                                                                                                                                                                                                                                                                                                                                                                           |                                        |
| 125                        | IPI00018465                                                                               | CCT7            | 543                                  | 543  | 543  | 5.9E+04                               | 5.9E+04 | 5.9E+04 | 19.7            | 7                     | 1         | 1         | 1        | 0         | T-COMPLEX PROTEIN 1 SUBUNIT ETA. DUAL SPECIFICITY PROTEIN PHOSPHATASE 3.; 23 KDA PROTEIN.                                                                                                                                                  | ; DUS3_HUMAN; Q5U0J1_HUMAN IDI2_HUMAN                                                                                                                                                                                                                                                                                                                                                                                                                                                                                                                                                                                                                                                                                                                                                                                                                                                                                                                                                                                                                         |                                        |
| 126                        | IPI00018671; IPI00790757                                                                  | DUSP3           | 185                                  | 210  | 198  | 2.0E+04                               | 2.3E+04 | 2.2E+04 | 40.0            | 6                     | 0         | 0         | 1        | 1         | ISO-PENTENYL-DIPHOSPHATE DELTA-ISOMERASE 2.                                                                                                                                                                                                | ; DUS3_HUMAN; Q5U0J1_HUMAN IDI2_HUMAN                                                                                                                                                                                                                                                                                                                                                                                                                                                                                                                                                                                                                                                                                                                                                                                                                                                                                                                                                                                                                         |                                        |
| 127                        | IPI00018740                                                                               | IDI2            | 227                                  | 227  | 227  | 2.7E+04                               | 2.7E+04 | 2.7E+04 | 10.1            | 2                     | 0         | 0         | 1        | 1         | HIGH MOBILITY GROUP PROTEIN 1-LIKE 10.; 22 KDA PROTEIN.; HIGH MOBILITY GROUP PROTEIN B1.; HIGH-MOBILITY GROUP BOX 1.; HIGH-MOBILITY GROUP BOX 1.; SIMILAR TO HIGH MOBILITY GROUP PROTEIN 1.; HIGH-MOBILITY GROUP BOX 1 VARIANT (FRAGMENT). | ; HMG1X_HUMAN; HMG1B1_HUMAN; Q14321_HUMAN; Q59GIW1_HUMAN; Q5T7C3_HUMAN; Q5T7C4_HUMAN; Q5T7C6_HUMAN; Q5T7C7_HUMAN; Q5T7C8_HUMAN                                                                                                                                                                                                                                                                                                                                                                                                                                                                                                                                                                                                                                                                                                                                                                                                                                                                                                                                |                                        |
| 128                        | IPI00018755; IPI00335132; IPI00419258; IPI00644653; IPI00645948; IPI00742929; IPI00815806 | HMG1L10; HMG1B1 | 158                                  | 215  | 184  | 1.8E+04                               | 2.5E+04 | 2.1E+04 | 17.2            | 2                     | 0         | 0         | 1        | 0         | ISOFORM 2 OF CDC42-INTERACTING PROTEIN 4.; ISOFORM 1 OF CDC42-INTERACTING PROTEIN 4.                                                                                                                                                       | ; HMG1X_HUMAN; HMG1B1_HUMAN; Q14321_HUMAN; Q59GIW1_HUMAN; Q5T7C3_HUMAN; Q5T7C4_HUMAN; Q5T7C6_HUMAN                                                                                                                                                                                                                                                                                                                                                                                                                                                                                                                                                                                                                                                                                                                                                                                                                                                                                                                                                            |                                        |
| 129                        | IPI00018804; IPI00168849                                                                  | TRIP10          | 545                                  | 601  | 573  | 6.3E+04                               | 6.8E+04 | 6.5E+04 | 13.1            | 4                     | 1         | 1         | 1        | 0         | ISOFORM 2 OF CDC42-INTERACTING PROTEIN 4.; ISOFORM 1 OF CDC42-INTERACTING PROTEIN 4.                                                                                                                                                       | Q96RJ1 CIP4_HUMAN                                                                                                                                                                                                                                                                                                                                                                                                                                                                                                                                                                                                                                                                                                                                                                                                                                                                                                                                                                                                                                             |                                        |

| Protein Group <sup>a</sup> | IPI ID                                                                            | IPI gene name  | Amino Acids in Sequence <sup>b</sup> |      |      | Protein Molecular Weight <sup>c</sup> |         |         | Seq. Cov. (max) | Unique Peptides (max) | Detection |           |          |           | Protein name                                                                                                                                                                                                                                   | Uniprot Id                                                                                                             | Uniprot Entry Name                                                                                                                       |
|----------------------------|-----------------------------------------------------------------------------------|----------------|--------------------------------------|------|------|---------------------------------------|---------|---------|-----------------|-----------------------|-----------|-----------|----------|-----------|------------------------------------------------------------------------------------------------------------------------------------------------------------------------------------------------------------------------------------------------|------------------------------------------------------------------------------------------------------------------------|------------------------------------------------------------------------------------------------------------------------------------------|
|                            |                                                                                   |                | Min.                                 | Max. | Mean | Min.                                  | Max.    | Mean    |                 |                       | Expt. I-1 | Expt. I-2 | Expt. II | Expt. III |                                                                                                                                                                                                                                                |                                                                                                                        |                                                                                                                                          |
| 130                        | IPI00018942; IPI00045172                                                          | FLJ10769       | 347                                  | 390  | 369  | 3.7E+04                               | 4.1E+04 | 3.9E+04 | 7.8             | 2                     | 0         | 0         | 1        | 1         | FLJ10769 PROTEIN.; HYPOTHETICAL PROTEIN LOC55739.                                                                                                                                                                                              | Q5T9X3; Q8IW45; Q9H7W1; Q9NVF5                                                                                         | Q5T9X3_HUMAN; Q8IW45_HUMAN; Q9H7W1_HUMAN; Q9NVF5_HUMAN                                                                                   |
| 131                        | IPI00019600                                                                       | UBE2V2         | 145                                  | 145  | 145  | 1.6E+04                               | 1.6E+04 | 1.6E+04 | 31.0            | 4                     | 0         | 0         | 1        | 1         | UBIQUITIN-CONJUGATING ENZYME E2 VARIANT 2.                                                                                                                                                                                                     | A0M8W4; Q15819                                                                                                         | A0M8W4_HUMAN; UBE2V2_HUMAN                                                                                                               |
| 132                        | IPI00019755; IPI000642936; IPI000797661                                           | GSTO1          | 146                                  | 241  | 196  | 1.7E+04                               | 2.8E+04 | 2.3E+04 | 12.9            | 4                     | 1         | 0         | 1        | 1         | GLUTATHIONE TRANSFERASE OMEGA-1.; GLUTATHIONE S-TRANSFERASE OMEGA 1.; 17 KDA PROTEIN.                                                                                                                                                          | P78417; O5TA02; Q5TA03; Q7Z3T2                                                                                         | ; GSTO1_HUMAN; Q5TA02_HUMAN                                                                                                              |
| 133                        | IPI00019884                                                                       | ACTN2          | 894                                  | 894  | 894  | 1.0E+05                               | 1.0E+05 | 1.0E+05 | 38.3            | 29                    | 1         | 1         | 1        | 1         | ALPHA-ACTININ-2. SUCCINATE SEMIALDEHYDE DEHYDROGENASE.                                                                                                                                                                                         | P35609; Q59FD9; Q5VXF1; Q86TF4; Q86T18                                                                                 | ACTN2_HUMAN; Q59FD9_HUMAN; Q5VXF1_HUMAN                                                                                                  |
| 134                        | IPI00019888; IPI000336008                                                         | ALDH5A1        | 535                                  | 548  | 542  | 5.7E+04                               | 5.9E+04 | 5.8E+04 | 10.7            | 4                     | 1         | 1         | 1        | 1         | MITOCHONDRIAL PRECURSOR.; ALDEHYDE DEHYDROGENASE 5A1 PRECURSOR, ISOFORM 1.                                                                                                                                                                     | P51649; Q546H9; Q8N3W6; Q8N3W7                                                                                         | Q546H9_HUMAN; Q8N3W6_HUMAN; Q8N3W7_HUMAN; SSDH_HUMAN                                                                                     |
| 135                        | IPI00019967                                                                       | SUOX           | 545                                  | 545  | 545  | 6.0E+04                               | 6.0E+04 | 6.0E+04 | 7.3             | 3                     | 0         | 0         | 1        | 0         | SULFITE OXIDASE.                                                                                                                                                                                                                               |                                                                                                                        |                                                                                                                                          |
| 136                        | IPI00020035                                                                       | NIPSNAP3B      | 247                                  | 247  | 247  | 2.8E+04                               | 2.8E+04 | 2.8E+04 | 22.3            | 4                     | 0         | 0         | 1        | 1         | PROTEIN NIPSNAP3B.                                                                                                                                                                                                                             | Q5VX30; Q9BS92; Q9NUM2                                                                                                 | NPS3B_HUMAN; Q5VX30_HUMAN                                                                                                                |
| 137                        | IPI00020210                                                                       | DYSF           | 2081                                 | 2081 | 2081 | 2.4E+05                               | 2.4E+05 | 2.4E+05 | 5.6             | 7                     | 1         | 1         | 1        | 1         | DYSFERLIN_V1.                                                                                                                                                                                                                                  | Q0H395; Q53QY3; Q53TD2; Q7Z6P1; Q8TEL8                                                                                 | Q0H395_HUMAN; Q53QY3_HUMAN; Q53TD2_HUMAN; Q7Z6P1_HUMAN; Q8TEL8_HUMAN                                                                     |
| 138                        | IPI00020436; IPI000429190; IPI000790785;                                          | RAB11A; RAB11B | 198                                  | 218  | 211  | 2.2E+04                               | 2.4E+04 | 2.4E+04 | 10.6            | 2                     | 0         | 0         | 1        | 0         | RAS-RELATED PROTEIN RAB-11B.; RAS-RELATED PROTEIN RAB-11A.; 24 KDA PROTEIN.; 22 KDA PROTEIN.                                                                                                                                                   | Q5TZN9; Q5U011; Q6FH80; Q6FH42; Q8N007; Q9JLX1                                                                         | ; Q5U011_HUMAN; Q6FH80_HUMAN; Q6FH42_HUMAN; RB11A_HUMAN; RB11B_HUMAN                                                                     |
| 139                        | IPI00020495                                                                       | MRPS36         | 103                                  | 103  | 103  | 1.1E+04                               | 1.1E+04 | 1.1E+04 | 33.0            | 2                     | 0         | 0         | 1        | 0         | MITOCHONDRIAL 28S RIBOSOMAL PROTEIN S36.                                                                                                                                                                                                       | P82909; Q9H2H4                                                                                                         | RT36_HUMAN                                                                                                                               |
| 140                        | IPI00020510                                                                       | ZCD1           | 108                                  | 108  | 108  | 1.2E+04                               | 1.2E+04 | 1.2E+04 | 34.3            | 3                     | 0         | 0         | 1        | 1         | ZINC FINGER CDGSH DOMAIN-CONTAINING PROTEIN 1.                                                                                                                                                                                                 | Q1X902; Q9NZ45                                                                                                         | Q1X902_HUMAN; ZCD1_HUMAN                                                                                                                 |
| 141                        | IPI00020530                                                                       | THEM2          | 140                                  | 140  | 140  | 1.5E+04                               | 1.5E+04 | 1.5E+04 | 17.9            | 2                     | 0         | 0         | 1        | 1         | THIOESTERASE SUPERFAMILY MEMBER 2.                                                                                                                                                                                                             | Q95549; Q9NPJ3                                                                                                         | THEM2_HUMAN                                                                                                                              |
| 142                        | IPI00020906                                                                       | IMP1A          | 277                                  | 277  | 277  | 3.0E+04                               | 3.0E+04 | 3.0E+04 | 15.9            | 4                     | 0         | 0         | 1        | 1         | INOSITOL MONOPHOSPHATASE.                                                                                                                                                                                                                      | P29218                                                                                                                 | IMP1A_HUMAN                                                                                                                              |
| 143                        | IPI00020984                                                                       | CANX           | 592                                  | 592  | 592  | 6.8E+04                               | 6.8E+04 | 6.8E+04 | 11.3            | 5                     | 1         | 1         | 1        | 1         | CALNEXIN PRECURSOR.                                                                                                                                                                                                                            | P27824                                                                                                                 | CALX_HUMAN                                                                                                                               |
| 144                        | IPI00020986; IPI000794403; IPI000796888                                           | LUM            | 202                                  | 338  | 257  | 2.3E+04                               | 3.8E+04 | 2.9E+04 | 27.5            | 7                     | 1         | 1         | 1        | 1         | LUMICAN PRECURSOR.; 23 KDA PROTEIN.; 26 KDA PROTEIN.                                                                                                                                                                                           | P51884; Q53FV4; Q96QM7                                                                                                 | ; LUM_HUMAN; Q53FV4_HUMAN                                                                                                                |
| 145                        | IPI00021263; IPI000790768                                                         | YWHAZ          | 229                                  | 245  | 237  | 2.6E+04                               | 2.8E+04 | 2.7E+04 | 27.1            | 5                     | 0         | 0         | 1        | 1         | 14-3-3 PROTEIN ZETA/Delta.; 26 KDA PROTEIN. DIHYDROLIPOYLLYSINE-RESIDUE ACETYLTRANSFERASE COMPONENT OF PYRUVATEDEHYDROGENASE COMPLEX. MITOCHONDRIAL PRECURSOR.                                                                                 | Q6P3U9; Q86V33                                                                                                         | ; 1433Z_HUMAN                                                                                                                            |
| 146                        | IPI00021338                                                                       | DLAT           | 614                                  | 614  | 614  | 6.6E+04                               | 6.6E+04 | 6.6E+04 | 13.4            | 7                     | 0         | 0         | 1        | 0         |                                                                                                                                                                                                                                                | P10515; Q16783                                                                                                         | ODP2_HUMAN                                                                                                                               |
| 147                        | IPI00021347                                                                       | UBE2L3         | 154                                  | 154  | 154  | 1.8E+04                               | 1.8E+04 | 1.8E+04 | 24.0            | 2                     | 1         | 1         | 1        | 1         | UBIQUITIN-CONJUGATING ENZYME E2 L3.                                                                                                                                                                                                            | P51966; P68036; P70653; Q9HAV1                                                                                         | UBE2L3_HUMAN                                                                                                                             |
| 148                        | IPI00021369                                                                       | CRYAB          | 175                                  | 175  | 175  | 2.0E+04                               | 2.0E+04 | 2.0E+04 | 44.0            | 10                    | 1         | 1         | 1        | 1         | ALPHA CRYSTALLIN B CHAIN.                                                                                                                                                                                                                      | Q43416; P02511; P02545; P02546; Q3BDU5; Q5I6Y4; Q5I6Y5; Q5I6Y6; Q5TCJ2; Q5TCJ3; Q5TCJ4; Q6UYC3; Q8N519; Q96918; Q96J42 | CRYAB_HUMAN                                                                                                                              |
| 149                        | IPI00021405; IPI000216952; IPI000216953; IPI000514204; IPI000644087; IPI000655812 | LMNA           | 465                                  | 664  | 573  | 5.3E+04                               | 7.4E+04 | 6.5E+04 | 18.2            | 10                    | 1         | 1         | 1        | 1         | ISOFORM A OF LAMIN-A/C.; ISOFORM C OF LAMIN-A/C.; ISOFORM DELTA10 OF LAMIN-A/C.; LAMIN A/C.; PROGERIN.; RHABDOMYOSARCOMA ANTIGEN MU-RMS-40.12.                                                                                                 | P02568; P68133; P99020; Q5T8M9                                                                                         | LMNA_HUMAN; Q3BDU5_HUMAN; Q5I6Y4_HUMAN; Q5I6Y5_HUMAN; Q5I6Y6_HUMAN; Q5TCJ2_HUMAN; Q5TCJ3_HUMAN; Q5TCJ4_HUMAN; Q6UYC3_HUMAN; Q8N519_HUMAN |
| 150                        | IPI00021428                                                                       | ACTA1          | 377                                  | 377  | 377  | 4.2E+04                               | 4.2E+04 | 4.2E+04 | 71.9            | 43                    | 1         | 1         | 1        | 1         | ACTIN, ALPHA SKELETAL MUSCLE.                                                                                                                                                                                                                  | P33998; Q3LIA5; Q75L23                                                                                                 | ACTS_HUMAN; Q5T8M9_HUMAN; PRST_HUMAN; Q3LIA5_HUMAN; Q75L23_HUMAN                                                                         |
| 151                        | IPI00021435                                                                       | PSMC2          | 433                                  | 433  | 433  | 4.9E+04                               | 4.9E+04 | 4.9E+04 | 8.8             | 3                     | 1         | 1         | 1        | 1         | 26S PROTEASE REGULATORY SUBUNIT 7.                                                                                                                                                                                                             | P10606; Q53YB7; Q6FHJ9; Q6FHM4; Q96J18; Q99610                                                                         | COX5B_HUMAN; Q53YB7_HUMAN; Q6FHJ9_HUMAN; Q6FHM4_HUMAN                                                                                    |
| 152                        | IPI00021785                                                                       | COX5B          | 129                                  | 129  | 129  | 1.4E+04                               | 1.4E+04 | 1.4E+04 | 9.3             | 2                     | 0         | 0         | 1        | 1         | CYTOCHROME C OXIDASE SUBUNIT 5B. MITOCHONDRIAL PRECURSOR.                                                                                                                                                                                      | Q09666; Q13727; Q6ZQN2; Q8N274                                                                                         | AHNK_HUMAN; Q13727_HUMAN; Q6ZQN2_HUMAN; Q8N274_HUMAN                                                                                     |
| 153                        | IPI00021812; IPI00055610                                                          | AHNAK          | 2960                                 | 2961 | 2961 | 3.1E+05                               | 3.1E+05 | 3.1E+05 | 1.4             | 3                     | 0         | 0         | 1        | 0         | AHNAK (FRAGMENT); 313 KDA PROTEIN. CAMP-DEPENDENT PROTEIN KINASE TYPE I-ALPHA REGULATORY SUBUNIT.                                                                                                                                              | P10644; Q56757; Q68DQ4                                                                                                 | KAP0_HUMAN; Q68DQ4_HUMAN                                                                                                                 |
| 154                        | IPI00021831                                                                       | PRKAR1A        | 381                                  | 381  | 381  | 4.3E+04                               | 4.3E+04 | 4.3E+04 | 32.3            | 11                    | 1         | 1         | 1        | 1         |                                                                                                                                                                                                                                                | Q68DQ4; Q6LED9; Q6LEJ8; Q6G785; Q8TDB0; Q9UCT8; Q9Y355                                                                 | AP0A1_HUMAN; Q6LEJ8_HUMAN; Q8TDB0_HUMAN; Q9UCT8_HUMAN; Q9Y355_HUMAN                                                                      |
| 155                        | IPI00021841                                                                       | APOA1          | 267                                  | 267  | 267  | 3.1E+04                               | 3.1E+04 | 3.1E+04 | 42.3            | 12                    | 1         | 1         | 1        | 1         | APOLIPOPROTEIN A-I PRECURSOR.                                                                                                                                                                                                                  | Q5STP7; Q92506; Q9UIQ1                                                                                                 | Q5STP7_HUMAN; Q92506_HUMAN; Q9UIQ1_HUMAN                                                                                                 |
| 156                        | IPI00021890; IPI000747151                                                         | HSD17B8        | 231                                  | 261  | 246  | 2.4E+04                               | 2.7E+04 | 2.5E+04 | 16.1            | 3                     | 0         | 0         | 1        | 1         | ESTRADIOL 17-BETA-DEHYDROGENASE B.; 24 KDA PROTEIN.                                                                                                                                                                                            | A2RRE8; Q53FV7                                                                                                         | ; DH88_HUMAN; Q53FV7_HUMAN                                                                                                               |
| 157                        | IPI00021925                                                                       | CPT1B          | 843                                  | 843  | 843  | 9.5E+04                               | 9.5E+04 | 9.5E+04 | 5.8             | 4                     | 1         | 0         | 1        | 1         | CARNITINE O-PALMITOYLTRANSFERASE I, MUSCLE ISOFORM.                                                                                                                                                                                            | A0FGR7; Q94848; Q6PJN4; Q9BSJ8; Q9H6J1; Q9H6W2; Q9Y416                                                                 | A2RRE8_HUMAN; Q53FV7_HUMAN                                                                                                               |
| 158                        | IPI00022143; IPI000746655                                                         | FAM62A         | 1104                                 | 1114 | 1109 | 1.2E+05                               | 1.2E+05 | 1.2E+05 | 8.6             | 6                     | 1         | 1         | 1        | 0         | ISOFORM 1 OF PROTEIN FAM62A.; ISOFORM 2 OF PROTEIN FAM62A.                                                                                                                                                                                     | P12111; Q16501; Q53QF4; Q53QF6; Q59F25; Q63HQ4; Q6MZG6; Q8N4Z1                                                         | A0FGR7_HUMAN; FAM62A_HUMAN                                                                                                               |
| 159                        | IPI00022200; IPI00072917; IPI00072918; IPI000220701; IPI000376964                 | COL6A3         | 2971                                 | 3177 | 3022 | 3.2E+05                               | 3.4E+05 | 3.3E+05 | 1.4             | 3                     | 0         | 1         | 1        | 1         | ALPHA 3 TYPE VI COLLAGEN ISOFORM 1 PRECURSOR.; ALPHA 3 TYPE VI COLLAGEN ISOFORM 3 PRECURSOR.; ALPHA 3 TYPE VI COLLAGEN ISOFORM 4 PRECURSOR.; ISOFORM 2 OF COLLAGEN ALPHA-3(VI) CHAIN PRECURSOR.; ALPHA 3 TYPE VI COLLAGEN ISOFORM 2 PRECURSOR. |                                                                                                                        | ; CO6A3_HUMAN; Q53QF4_HUMAN; Q53QF6_HUMAN; Q59F25_HUMAN; Q63HQ4_HUMAN; Q6MZG6_HUMAN; Q8N4Z1_HUMAN                                        |

| Protein Group | IPI ID                                                                       | IPI gene name | Amino Acids in Sequence <sup>1</sup> |      |      | Protein Molecular Weight <sup>1</sup> |         |         | Seq. Cov. (max) | Unique Peptides (max) | Detection |           |          |           | Protein name                                                                                                                                                                                                                                                                                                                                                | Uniprot Id                                                                                                                                                                                          | Uniprot Entry Name                                     |
|---------------|------------------------------------------------------------------------------|---------------|--------------------------------------|------|------|---------------------------------------|---------|---------|-----------------|-----------------------|-----------|-----------|----------|-----------|-------------------------------------------------------------------------------------------------------------------------------------------------------------------------------------------------------------------------------------------------------------------------------------------------------------------------------------------------------------|-----------------------------------------------------------------------------------------------------------------------------------------------------------------------------------------------------|--------------------------------------------------------|
|               |                                                                              |               | Min.                                 | Max. | Mean | Min.                                  | Max.    | Mean    |                 |                       | Expt. I-1 | Expt. I-2 | Expt. II | Expt. III |                                                                                                                                                                                                                                                                                                                                                             |                                                                                                                                                                                                     |                                                        |
| 160           | IPI00022202; IPI00215777; IPI00788624; IPI00789657; IPI00790115; IPI00793177 | SLC25A3       | 215                                  | 362  | 316  | 2.4E+04                               | 4.0E+04 | 3.5E+04 | 12.2            | 4                     | 1         | 1         | 1        | 1         | ISOFORM A OF PHOSPHATE CARRIER PROTEIN, MITOCHONDRIAL PRECURSOR.; ISOFORM B OF PHOSPHATE CARRIER PROTEIN, MITOCHONDRIAL PRECURSOR.; 31 KDA PROTEIN.; 36 KDA PROTEIN.; CDNA FLJ90278 FIS, CLONE NT2RP1000325, HIGHLY SIMILAR TO PHOSPHATECARRIER PROTEIN, MITOCHONDRIAL PRECURSOR.; 24 KDA PROTEIN. BASIC LEUCINE ZIPPER AND W2 DOMAIN-CONTAINING PROTEIN 2. | Q00325; Q53HC3; Q7Z7N7; Q8NCF7; Q96A03 Q3B779; Q75MG1; Q9H3F7; Q9Y6E2 P04179; P78434; Q16792; Q4ZJ11; Q57CM1; Q7Z7M4; Q7Z7M5; Q7Z7M6; Q7Z7M7; Q96EE6; Q9P223 P02730; P78487; Q12Z45; Q4KKW9; Q4VB84 | ; MPCP_HUMAN; Q53HC3_HUMAN; Q7Z7N7_HUMAN; Q8NCF7_HUMAN |
| 161           | IPI00022305                                                                  | BZW2          | 419                                  | 419  | 419  | 4.8E+04                               | 4.8E+04 | 4.8E+04 | 9.3             | 3                     | 1         | 1         | 1        | 0         |                                                                                                                                                                                                                                                                                                                                                             | BZW2_HUMAN; Q75MG1_HUMAN                                                                                                                                                                            |                                                        |
| 162           | IPI00022314                                                                  | SOD2          | 222                                  | 222  | 222  | 2.5E+04                               | 2.5E+04 | 2.5E+04 | 33.3            | 8                     | 1         | 1         | 1        | 1         | SUPEROXIDE DISMUTASE [MN], MITOCHONDRIAL PRECURSOR.                                                                                                                                                                                                                                                                                                         | Q4ZJ11_HUMAN; Q7Z7M4_HUMAN; Q7Z7M5_HUMAN; Q7Z7M6_HUMAN; Q7Z7M7_HUMAN; SODM_HUMAN                                                                                                                    |                                                        |
| 163           | IPI00022361; IPI00791534                                                     | SLC4A1        | 911                                  | 929  | 920  | 1.0E+05                               | 1.0E+05 | 1.0E+05 | 20.2            | 13                    | 1         | 1         | 1        | 1         | BAND 3 ANION TRANSPORT PROTEIN.; SOLUTE CARRIER FAMILY 4 ANION EXCHANGER MEMBER 1 VARIANT.                                                                                                                                                                                                                                                                  | B3AT_HUMAN; Q1Z245_HUMAN; Q4KKW9_HUMAN                                                                                                                                                              |                                                        |
| 164           | IPI00022433                                                                  | HSPB6         | 175                                  | 175  | 175  | 1.9E+04                               | 1.9E+04 | 1.9E+04 | 41.7            | 6                     | 1         | 1         | 1        | 1         | ALPHA CRYSTALLIN FAMILY PROTEIN.                                                                                                                                                                                                                                                                                                                            |                                                                                                                                                                                                     |                                                        |
| 165           | IPI00022442                                                                  | NDUFAB1       | 156                                  | 156  | 156  | 1.7E+04                               | 1.7E+04 | 1.7E+04 | 15.4            | 3                     | 0         | 0         | 1        | 1         | ACYL CARRIER PROTEIN, MITOCHONDRIAL PRECURSOR.                                                                                                                                                                                                                                                                                                              | ACPM_HUMAN                                                                                                                                                                                          |                                                        |
| 166           | IPI00022463; IPI00798430                                                     | TF            | 698                                  | 698  | 698  | 7.7E+04                               | 7.7E+04 | 7.7E+04 | 29.1            | 17                    | 1         | 1         | 1        | 1         | SEROTRANSFERRIN PRECURSOR.; TRANSFERRIN VARIANT (FRAGMENT).                                                                                                                                                                                                                                                                                                 | A0PJA6_HUMAN; Q06AH7_HUMAN; Q1HBA5_HUMAN; Q53H26_HUMAN; TRFE_HUMAN                                                                                                                                  |                                                        |
| 167           | IPI00022744; IPI00219994                                                     | CSE1L         | 945                                  | 971  | 958  | 1.1E+05                               | 1.1E+05 | 1.1E+05 | 8.7             | 7                     | 1         | 1         | 1        | 1         | ISOFORM 1 OF EXPORTIN-2.; ISOFORM 3 OF EXPORTIN-2.                                                                                                                                                                                                                                                                                                          | XPO2_HUMAN                                                                                                                                                                                          |                                                        |
| 168           | IPI00022774                                                                  | VCP           | 806                                  | 806  | 806  | 8.9E+04                               | 8.9E+04 | 8.9E+04 | 29.7            | 19                    | 1         | 1         | 1        | 1         | TRANSITIONAL ENDOPLASMIC RETICULUM ATPASE. TRIFUNCTIONAL ENZYME BETA SUBUNIT, MITOCHONDRIAL PRECURSOR.                                                                                                                                                                                                                                                      | Q0IIN5_HUMAN; Q0V924_HUMAN; Q5VYM0_HUMAN; Q66IF9_HUMAN; Q9HAP0_HUMAN; Q9HAP1_HUMAN; Q9NTC4                                                                                                          |                                                        |
| 169           | IPI00022793                                                                  | HADHB         | 475                                  | 475  | 475  | 5.1E+04                               | 5.1E+04 | 5.1E+04 | 40.6            | 19                    | 1         | 1         | 1        | 1         | MITOCHONDRIAL PRECURSOR.                                                                                                                                                                                                                                                                                                                                    | Q9T2V8_HUMAN                                                                                                                                                                                        |                                                        |
| 170           | IPI00022891                                                                  | SLC25A4       | 298                                  | 298  | 298  | 3.3E+04                               | 3.3E+04 | 3.3E+04 | 34.9            | 10                    | 1         | 1         | 1        | 1         | ADP/ATP TRANSLOCASE 1.                                                                                                                                                                                                                                                                                                                                      | ADT1_HUMAN                                                                                                                                                                                          |                                                        |
| 171           | IPI00023191                                                                  | TOM1          | 493                                  | 493  | 493  | 5.4E+04                               | 5.4E+04 | 5.4E+04 | 10.1            | 4                     | 1         | 1         | 1        | 0         | TARGET OF MYB1.                                                                                                                                                                                                                                                                                                                                             | Q86X74_HUMAN                                                                                                                                                                                        |                                                        |
| 172           | IPI00023635; IPI00555726                                                     | IMPA2         | 261                                  | 288  | 275  | 2.9E+04                               | 3.1E+04 | 3.0E+04 | 7.6             | 2                     | 0         | 0         | 1        | 0         | ISOFORM 1 OF INOSITOL MONOPHOSPHATASE 2.; ISOFORM 2 OF INOSITOL MONOPHOSPHATASE 2.                                                                                                                                                                                                                                                                          | IMPA2_HUMAN; Q9UNV4_HUMAN; Q9UNV5_HUMAN; Q9UNV6_HUMAN; Q9UNV5_HUMAN; Q9UNV6_HUMAN; Q9UPE5_HUMAN; Q9UPE6_HUMAN; Q9UPE7_HUMAN; Q9UPE8_HUMAN                                                           |                                                        |
| 173           | IPI00023640                                                                  | PDCD5         | 125                                  | 125  | 125  | 1.4E+04                               | 1.4E+04 | 1.4E+04 | 28.8            | 3                     | 0         | 0         | 1        | 1         | PROGRAMMED CELL DEATH PROTEIN 5.                                                                                                                                                                                                                                                                                                                            | PDCD5_HUMAN                                                                                                                                                                                         |                                                        |
| 174           | IPI00024046                                                                  | CDH13         | 713                                  | 713  | 713  | 7.8E+04                               | 7.8E+04 | 7.8E+04 | 7.6             | 4                     | 1         | 1         | 1        | 1         | CADHERIN-13 PRECURSOR.                                                                                                                                                                                                                                                                                                                                      | CAD13_HUMAN                                                                                                                                                                                         |                                                        |
| 175           | IPI00024157                                                                  | FKBP3         | 224                                  | 224  | 224  | 2.5E+04                               | 2.5E+04 | 2.5E+04 | 25.0            | 6                     | 0         | 0         | 1        | 1         | FK506-BINDING PROTEIN 3.                                                                                                                                                                                                                                                                                                                                    | FKBP3_HUMAN; Q53G08_HUMAN                                                                                                                                                                           |                                                        |
| 176           | IPI00024175                                                                  | PSMA7         | 248                                  | 248  | 248  | 2.8E+04                               | 2.8E+04 | 2.8E+04 | 26.2            | 5                     | 0         | 0         | 1        | 1         | ISOFORM 1 OF PROTEASOME SUBUNIT ALPHA TYPE 7. ISOFORM LONG OF UBIQUITIN CARBOXYL-TERMINAL HYDROLASE 5.; ISOFORM SHORT OF UBIQUITIN CARBOXYL-TERMINAL HYDROLASE 5.                                                                                                                                                                                           | PSA7_HUMAN; Q05DH1_HUMAN                                                                                                                                                                            |                                                        |
| 177           | IPI00024664; IPI00375145                                                     | USP5          | 835                                  | 858  | 847  | 9.3E+04                               | 9.6E+04 | 9.5E+04 | 15.2            | 7                     | 1         | 1         | 1        | 1         | RECEPTOR EXPRESSION-ENHANCING PROTEIN 5.; 21 KDA PROTEIN.                                                                                                                                                                                                                                                                                                   | UBP5_HUMAN                                                                                                                                                                                          |                                                        |
| 178           | IPI00024670; IPI00744902                                                     | REEP5         | 185                                  | 189  | 187  | 2.1E+04                               | 2.1E+04 | 2.1E+04 | 6.4             | 2                     | 0         | 0         | 1        | 0         |                                                                                                                                                                                                                                                                                                                                                             | Q00765; Q04198; Q5QGT0; Q9BWH9                                                                                                                                                                      | ; REEP5_HUMAN                                          |
| 179           | IPI00024804; IPI00396118; IPI00794585                                        | ATP2A1        | 807                                  | 1001 | 934  | 8.8E+04                               | 1.1E+05 | 1.0E+05 | 35.9            | 42                    | 1         | 1         | 1        | 1         | ISOFORM SERCA1B OF SARCOPLASMIC/ENDOPLASMIC RETICULUM CALCIUM ATPASE1.; ISOFORM SERCA1A OF SARCOPLASMIC/ENDOPLASMIC RETICULUM CALCIUM ATPASE1.; SIMILAR TO ATPASE, CA++ TRANSPORTING, CARDIAC MUSCLE, FAST TWITCH 1.                                                                                                                                        | Q14983; Q14984; Q72675; Q726E5; Q8N3X5                                                                                                                                                              | AT2A1_HUMAN; Q72675_HUMAN; Q726E5_HUMAN; Q8N3X5_HUMAN  |
| 180           | IPI00024915; IPI00759663                                                     | PRDX5         | 162                                  | 214  | 188  | 1.7E+04                               | 2.2E+04 | 2.0E+04 | 27.2            | 4                     | 1         | 0         | 1        | 1         | ISOFORM MITOCHONDRIAL OF PEROXIREDOXIN-5, CYTOPLASMIC+PEROXISOMAL OF PEROXIREDOXIN-5, MITOCHONDRIAL PRECURSOR.                                                                                                                                                                                                                                              | P30044; Q14CK0; Q6IAF2; Q9UBU5; Q9UJU4; Q9UKX4 P30048; P35690; Q0D2H1; Q13776; Q14579; Q53HC2; Q575V2; Q96HK4                                                                                       | PRDX5_HUMAN                                            |
| 181           | IPI00024919; IPI00374151                                                     | PRDX3         | 238                                  | 256  | 247  | 2.6E+04                               | 2.8E+04 | 2.7E+04 | 18.4            | 4                     | 0         | 1         | 1        | 1         | THIOREDOXIN-DEPENDENT PEROXIDE REDUCTASE, MITOCHONDRIAL PRECURSOR.; PEROXIREDOXIN 3 ISOFORM B.                                                                                                                                                                                                                                                              | PRDX3_HUMAN; Q14579_HUMAN; Q53HC2_HUMAN                                                                                                                                                             |                                                        |
| 182           | IPI00024920                                                                  | ATP5D         | 168                                  | 168  | 168  | 1.7E+04                               | 1.7E+04 | 1.7E+04 | 22.6            | 3                     | 1         | 0         | 1        | 1         | ATP SYNTHASE DELTA CHAIN, MITOCHONDRIAL PRECURSOR.                                                                                                                                                                                                                                                                                                          | P30049; Q6FG90 Q60509; Q75298; Q6GMT0; Q7RTM6; Q7RTN0; Q7RTN1; Q7RTN2                                                                                                                               | ATPD_HUMAN; Q6FG90_HUMAN                               |
| 183           | IPI00024983; IPI00410134                                                     | RTN2          | 205                                  | 545  | 375  | 2.2E+04                               | 5.9E+04 | 4.1E+04 | 14.2            | 5                     | 1         | 1         | 1        | 1         | ISOFORM RTN2-A OF RETICULON-2.; ISOFORM RTN2-C OF RETICULON-2.                                                                                                                                                                                                                                                                                              | Q6GMT0_HUMAN; Q7RTN0_HUMAN; RTN2_HUMAN                                                                                                                                                              |                                                        |
| 184           | IPI00024993                                                                  | ECHS1         | 290                                  | 290  | 290  | 3.1E+04                               | 3.1E+04 | 3.1E+04 | 18.6            | 5                     | 0         | 0         | 1        | 1         | ENOYL-COA HYDRATASE, MITOCHONDRIAL PRECURSOR.                                                                                                                                                                                                                                                                                                               | O00739; P30084; Q5VWY1; Q96H54 P20618; Q53FT8; Q9BWA8                                                                                                                                               | ECHM_HUMAN                                             |
| 185           | IPI00025019                                                                  | PSMB1         | 241                                  | 241  | 241  | 2.6E+04                               | 2.6E+04 | 2.6E+04 | 8.3             | 2                     | 0         | 0         | 1        | 0         | PROTEASOME SUBUNIT BETA TYPE 1 PRECURSOR.                                                                                                                                                                                                                                                                                                                   | PSB1_HUMAN; Q53FT8_HUMAN                                                                                                                                                                            |                                                        |

| Protein Group <sup>a</sup> | IPI ID                                                                                                                                        | IPI gene name                                                                                                                                                  | Amino Acids in Sequence <sup>b</sup> |      |      | Protein Molecular Weight <sup>c</sup> |         |         | Seq. Cov. (max) | Unique Peptides (max) | Detection |           |          |           | Protein name                                                                                                                                                                                                                                                                                                                                                   | Uniprot Id                                                                                                                                                                                                                                                                                                                                                 | Uniprot Entry Name                                                                                                                                                                                               |
|----------------------------|-----------------------------------------------------------------------------------------------------------------------------------------------|----------------------------------------------------------------------------------------------------------------------------------------------------------------|--------------------------------------|------|------|---------------------------------------|---------|---------|-----------------|-----------------------|-----------|-----------|----------|-----------|----------------------------------------------------------------------------------------------------------------------------------------------------------------------------------------------------------------------------------------------------------------------------------------------------------------------------------------------------------------|------------------------------------------------------------------------------------------------------------------------------------------------------------------------------------------------------------------------------------------------------------------------------------------------------------------------------------------------------------|------------------------------------------------------------------------------------------------------------------------------------------------------------------------------------------------------------------|
|                            |                                                                                                                                               |                                                                                                                                                                | Min.                                 | Max. | Mean | Min.                                  | Max.    | Mean    |                 |                       | Expt. I-1 | Expt. I-2 | Expt. II | Expt. III |                                                                                                                                                                                                                                                                                                                                                                |                                                                                                                                                                                                                                                                                                                                                            |                                                                                                                                                                                                                  |
| 186                        | IPI00025084; IPI00794720                                                                                                                      | CAPNS1                                                                                                                                                         | 268                                  | 322  | 295  | 2.8E+04                               | 3.4E+04 | 3.1E+04 | 18.3            | 4                     | 0         | 0         | 1        | 1         | CALPAIN SMALL SUBUNIT 1.; 34 KDA PROTEIN. CYTOCHROME C OXIDASE SUBUNIT 5A, MITOCHONDRIAL PRECURSOR.                                                                                                                                                                                                                                                            | P04632; Q8WTX3; Q96E70 P20674; P30045; Q71UP1; Q8TB65                                                                                                                                                                                                                                                                                                      | ; CPNS1_HUMAN COX5A_HUMAN; Q71UP1_HUMAN; Q8TB65_HUMAN                                                                                                                                                            |
| 187                        | IPI00025086                                                                                                                                   | COX5A                                                                                                                                                          | 150                                  | 150  | 150  | 1.7E+04                               | 1.7E+04 | 1.7E+04 | 24.7            | 3                     | 1         | 0         | 1        | 1         | MYOSIN-BINDING PROTEIN C, SLOW-TYPE.; 127 KDA PROTEIN.; MYOSIN BINDING PROTEIN C, SLOW TYPE ISOFORM 4.                                                                                                                                                                                                                                                         | Q00872; Q15497; Q569K7; Q63HJ3 Q75306; Q53HG2; Q5VTW0; Q969P3; Q9HC11; Q9HC12; Q9JUEV3                                                                                                                                                                                                                                                                     | ; MYPC1_HUMAN; Q569K7_HUMAN; Q63HJ3_HUMAN NDUS2_HUMAN; Q53HG2_HUMAN; Q5VTW0_HUMAN; Q9HC11_HUMAN; Q9HC12_HUMAN                                                                                                    |
| 188                        | IPI00025092; IPI00791650; IPI00797657                                                                                                         | MYBPC1                                                                                                                                                         | 1123                                 | 1141 | 1130 | 1.3E+05                               | 1.3E+05 | 1.3E+05 | 54.4            | 72                    | 1         | 1         | 1        | 1         | NADH DEHYDROGENASE [UBIQUINONE] IRON-SULFUR PROTEIN 2, MITOCHONDRIAL PRECURSOR.                                                                                                                                                                                                                                                                                | Q0872; Q15497; Q569K7; Q63HJ3 Q75306; Q53HG2; Q5VTW0; Q969P3; Q9HC11; Q9HC12; Q9JUEV3                                                                                                                                                                                                                                                                      | ; MYPC1_HUMAN; Q569K7_HUMAN; Q63HJ3_HUMAN NDUS2_HUMAN; Q53HG2_HUMAN; Q5VTW0_HUMAN; Q9HC11_HUMAN; Q9HC12_HUMAN                                                                                                    |
| 189                        | IPI00025239                                                                                                                                   | NDUFS2                                                                                                                                                         | 463                                  | 463  | 463  | 5.3E+04                               | 5.3E+04 | 5.3E+04 | 45.1            | 15                    | 1         | 1         | 1        | 1         | PROTEIN DISULFIDE-ISOMERASE A3 PRECURSOR.; 55 KDA PROTEIN.                                                                                                                                                                                                                                                                                                     | P30101; Q13453; Q14255; Q81YF8; Q9JUMU7 Q75390; Q71UT9; Q7KZH0; Q96FZ8; Q9BWN8                                                                                                                                                                                                                                                                             | ; PDIA3_HUMAN C15Y_HUMAN                                                                                                                                                                                         |
| 190                        | IPI00025252; IPI00657680                                                                                                                      | PDIA3                                                                                                                                                          | 485                                  | 505  | 495  | 5.5E+04                               | 5.7E+04 | 5.6E+04 | 22.0            | 8                     | 1         | 1         | 1        | 0         | CITRATE SYNTHASE, MITOCHONDRIAL PRECURSOR.                                                                                                                                                                                                                                                                                                                     | P04792; Q6FI47; Q96C20; Q96E17; Q9UC31; Q9UC35 Q02413; Q712V6 Q75489; Q53FM7; Q81JF4; Q9JUNQ8 P20807; Q9STU4; Q9Y556; Q9Y557                                                                                                                                                                                                                               | ; PDIA3_HUMAN C15Y_HUMAN                                                                                                                                                                                         |
| 191                        | IPI00025366                                                                                                                                   | CS                                                                                                                                                             | 466                                  | 466  | 466  | 5.2E+04                               | 5.2E+04 | 5.2E+04 | 31.8            | 14                    | 1         | 1         | 1        | 1         | HEAT-SHOCK PROTEIN BETA-1. DESMOGLEIN-1 PRECURSOR.                                                                                                                                                                                                                                                                                                             | Q02413; Q712V6 Q75489; Q53FM7; Q81JF4; Q9JUNQ8 P20807; Q9STU4; Q9Y556; Q9Y557                                                                                                                                                                                                                                                                              | HSPB1_HUMAN; Q96C20_HUMAN; Q96E17_HUMAN; Q9UC35_HUMAN DSG1_HUMAN; Q712V6_HUMAN NDUS3_HUMAN; Q53FM7_HUMAN; Q9UF24_HUMAN                                                                                           |
| 192                        | IPI00025512                                                                                                                                   | HSPB1                                                                                                                                                          | 205                                  | 205  | 205  | 2.3E+04                               | 2.3E+04 | 2.3E+04 | 74.6            | 14                    | 1         | 1         | 1        | 1         | NADH DEHYDROGENASE [UBIQUINONE] IRON-SULFUR PROTEIN 3, MITOCHONDRIAL PRECURSOR.                                                                                                                                                                                                                                                                                | Q02413; Q712V6 Q75489; Q53FM7; Q81JF4; Q9JUNQ8 P20807; Q9STU4; Q9Y556; Q9Y557                                                                                                                                                                                                                                                                              | NDUS3_HUMAN; Q53FM7_HUMAN; Q9UF24_HUMAN                                                                                                                                                                          |
| 193                        | IPI00025753                                                                                                                                   | DSG1                                                                                                                                                           | 1049                                 | 1049 | 1049 | 1.1E+05                               | 1.1E+05 | 1.1E+05 | 7.7             | 6                     | 0         | 0         | 1        | 1         | ISOFORM I OF CALPAIN-3.                                                                                                                                                                                                                                                                                                                                        | Q02413; Q712V6 Q75489; Q53FM7; Q81JF4; Q9JUNQ8 P20807; Q9STU4; Q9Y556; Q9Y557                                                                                                                                                                                                                                                                              | CAN3_HUMAN                                                                                                                                                                                                       |
| 194                        | IPI00025796                                                                                                                                   | NDUFS3                                                                                                                                                         | 264                                  | 264  | 264  | 3.0E+04                               | 3.0E+04 | 3.0E+04 | 20.4            | 5                     | 1         | 1         | 1        | 1         | DOLICHYL-DIPHOSPHOLIGOSACCHARIDE--PROTEIN GLYCOSYLTRANSFERASE 67 KDATASUBUNIT PRECURSOR.                                                                                                                                                                                                                                                                       | Q53EP4; Q68DT1; Q6IBR0; Q96HX3 P12882; Q14CA4; Q9Y622                                                                                                                                                                                                                                                                                                      | Q53EP4_HUMAN; Q68DT1_HUMAN; Q6IBR0_HUMAN; Q96HX3_HUMAN                                                                                                                                                           |
| 195                        | IPI00025819                                                                                                                                   | CAPN3                                                                                                                                                          | 821                                  | 821  | 821  | 9.4E+04                               | 9.4E+04 | 9.4E+04 | 12.6            | 7                     | 1         | 1         | 1        | 1         | MYOSIN-1.                                                                                                                                                                                                                                                                                                                                                      | Q53EP4; Q68DT1; Q6IBR0; Q96HX3 P12882; Q14CA4; Q9Y622                                                                                                                                                                                                                                                                                                      | MYH1_HUMAN                                                                                                                                                                                                       |
| 196                        | IPI00025874                                                                                                                                   | RPN1                                                                                                                                                           | 646                                  | 646  | 646  | 7.3E+04                               | 7.3E+04 | 7.3E+04 | 15.8            | 7                     | 1         | 1         | 1        | 1         | MYOSIN-7.                                                                                                                                                                                                                                                                                                                                                      | Q53EP4; Q68DT1; Q6IBR0; Q96HX3 P12882; Q14CA4; Q9Y622                                                                                                                                                                                                                                                                                                      | MYH7_HUMAN                                                                                                                                                                                                       |
| 197                        | IPI00025879                                                                                                                                   | MYH1                                                                                                                                                           | 1939                                 | 1939 | 1939 | 2.2E+05                               | 2.2E+05 | 2.2E+05 | 62.0            | 224                   | 1         | 1         | 1        | 1         | CHARGED MULTIVESICULAR BODY PROTEIN 4B. GLUCOSIDASE 2 SUBUNIT BETA PRECURSOR.; GLUCOSIDASE II BETA SUBUNIT PRECURSOR.; HAPLN4 PROTEIN (FRAGMENT).                                                                                                                                                                                                              | A2TDB6; P12883; Q14836; Q14837; Q14904; Q14905; Q16579; Q2M1Y6; Q2XUS2; Q59EV3; Q5GJ54; Q92679; Q9H1D5; Q9UDA2; Q9JUMM8 Q53ZD6; Q9H444 A2VQC4; P14314; Q96B09; Q96D06; Q9P0W9 P47756; Q5U0L4; Q8TB49; Q9NLC4 P55786; Q6P145; Q9NP16; Q9UEM2 P06366; P62263; Q5BJ0                                                                                          | A2TDB6_HUMAN; MYH7_HUMAN; Q14905_HUMAN; Q2XUS2_HUMAN; Q59EV3_HUMAN; Q9UDA2_HUMAN; Q9JUMM8_HUMAN CHM4B_HUMAN                                                                                                      |
| 198                        | IPI00025880                                                                                                                                   | MYH7                                                                                                                                                           | 1935                                 | 1935 | 1935 | 2.2E+05                               | 2.2E+05 | 2.2E+05 | 67.4            | 238                   | 1         | 1         | 1        | 1         | ISOFORM 1 OF F-ACTIN CAPPING PROTEIN SUBUNIT BETA.                                                                                                                                                                                                                                                                                                             | Q96B09; Q96D06; Q9P0W9 P47756; Q5U0L4; Q8TB49; Q9NLC4 P55786; Q6P145; Q9NP16; Q9UEM2 P06366; P62263; Q5BJ0                                                                                                                                                                                                                                                 | A2VQC4_HUMAN; GLU2B_HUMAN                                                                                                                                                                                        |
| 199                        | IPI00025974                                                                                                                                   | CHMP4B                                                                                                                                                         | 224                                  | 224  | 224  | 2.5E+04                               | 2.5E+04 | 2.5E+04 | 17.9            | 3                     | 0         | 1         | 1        | 1         | PUROMYCIN-SENSITIVE AMINOPEPTIDASE.                                                                                                                                                                                                                                                                                                                            | Q9NP16; Q9UEM2 P06366; P62263; Q5BJ0                                                                                                                                                                                                                                                                                                                       | PSA_HUMAN                                                                                                                                                                                                        |
| 200                        | IPI00026154; IPI00792916; IPI00829824                                                                                                         | PRKCSH                                                                                                                                                         | 181                                  | 528  | 412  | 2.0E+04                               | 5.9E+04 | 4.6E+04 | 6.3             | 3                     | 1         | 1         | 1        | 0         | 40S RIBOSOMAL PROTEIN S14.                                                                                                                                                                                                                                                                                                                                     | A0PK91; A2RUU6; O00775; O00776; O00777; O00778; P02261; P04908; P002038; P20670; P20671; P57754; Q08AJ9; Q16777; Q2M1R2; Q540R1; Q5JXQ5; Q6DR47; Q6FGY6; Q6F113; Q76PA6; Q7L7L0; Q81UE5; Q93077; Q96KK5; Q99878; Q98TM1; Q9NV63 A2A418; P06396; Q5T012; Q8WVU7 P55822; Q53Y47; Q98BR8 Q53HS0; Q96AW5 Q75495; P30566; Q5T134; Q71UA4 P47985; Q6NVX5; Q9JPH2 | RS14_HUMAN                                                                                                                                                                                                       |
| 201                        | IPI00026185                                                                                                                                   | CAPZB                                                                                                                                                          | 277                                  | 277  | 277  | 3.1E+04                               | 3.1E+04 | 3.1E+04 | 8.7             | 2                     | 0         | 0         | 1        | 0         | HISTONE H2A TYPE 1-B.; HISTONE H2A TYPE 3.; HISTONE H2A TYPE 1-H.; H2A HISTONE FAMILY, MEMBER J ISOFORM 1.; HISTONE H2A TYPE 1-C.; HISTONE H2A TYPE 2-A.; H2A HISTONE FAMILY, MEMBER J ISOFORM 2.; HISTONE H2A TYPE 1-D.; HISTONE H2A TYPE 1.; HISTONE H2A TYPE 2-C.; HISTONE H2A TYPE 1-J. ISOFORM 1 OF GELSOLIN PRECURSOR.; ISOFORM 2 OF GELSOLIN PRECURSOR. | Q96KK5; Q99878; Q98TM1; Q9NV63 A2A418; P06396; Q5T012; Q8WVU7 P55822; Q53Y47; Q98BR8 Q53HS0; Q96AW5 Q75495; P30566; Q5T134; Q71UA4 P47985; Q6NVX5; Q9JPH2                                                                                                                                                                                                  | A2VQC4_HUMAN; GLU2B_HUMAN CAPZB_HUMAN                                                                                                                                                                            |
| 202                        | IPI00026216                                                                                                                                   | NPEPPS                                                                                                                                                         | 919                                  | 919  | 919  | 1.0E+05                               | 1.0E+05 | 1.0E+05 | 34.9            | 25                    | 1         | 1         | 1        | 1         | SH3 DOMAIN-BINDING GLUTAMIC ACID-RICH PROTEIN. GLUTAMINYL-TRNA SYNTHETASE.                                                                                                                                                                                                                                                                                     | Q98BR8 Q53HS0; Q96AW5 Q75495; P30566; Q5T134; Q71UA4 P47985; Q6NVX5; Q9JPH2                                                                                                                                                                                                                                                                                | PSA_HUMAN                                                                                                                                                                                                        |
| 203                        | IPI00026271                                                                                                                                   | RPS14 H2AFJ; HIST1H2AB; HIST1H2AC; HIST1H2AD; HIST1H2AE; HIST1H2AG; HIST1H2AH; HIST1H2AI; HIST1H2AJ; HIST1H2AK; HIST1H2AL; HIST1H2AM; HIST2H2AA3; HIST2H2AAA4; | 151                                  | 151  | 151  | 1.6E+04                               | 1.6E+04 | 1.6E+04 | 15.2            | 2                     | 0         | 0         | 1        | 0         | HISTONE H2A TYPE 1-B.; HISTONE H2A TYPE 3.; HISTONE H2A TYPE 1-H.; H2A HISTONE FAMILY, MEMBER J ISOFORM 1.; HISTONE H2A TYPE 1-C.; HISTONE H2A TYPE 2-A.; H2A HISTONE FAMILY, MEMBER J ISOFORM 2.; HISTONE H2A TYPE 1-D.; HISTONE H2A TYPE 1.; HISTONE H2A TYPE 2-C.; HISTONE H2A TYPE 1-J. ISOFORM 1 OF GELSOLIN PRECURSOR.; ISOFORM 2 OF GELSOLIN PRECURSOR. | Q98BR8 Q53HS0; Q96AW5 Q75495; P30566; Q5T134; Q71UA4 P47985; Q6NVX5; Q9JPH2                                                                                                                                                                                                                                                                                | RS14_HUMAN                                                                                                                                                                                                       |
| 204                        | IPI00026272; IPI00031562; IPI00081836; IPI00102165; IPI00216456; IPI00216457; IPI00220855; IPI00255316; IPI00291764; IPI00339274; IPI00552873 | GSN                                                                                                                                                            | 128                                  | 155  | 132  | 1.4E+04                               | 1.7E+04 | 1.4E+04 | 35.7            | 4                     | 1         | 0         | 1        | 1         | SH3 DOMAIN-BINDING GLUTAMIC ACID-RICH PROTEIN. GLUTAMINYL-TRNA SYNTHETASE.                                                                                                                                                                                                                                                                                     | Q98BR8 Q53HS0; Q96AW5 Q75495; P30566; Q5T134; Q71UA4 P47985; Q6NVX5; Q9JPH2                                                                                                                                                                                                                                                                                | A2RUU6_HUMAN; H2A1B_HUMAN; H2A1C_HUMAN; H2A1D_HUMAN; H2A1H_HUMAN; H2A1J_HUMAN; H2A1_HUMAN; H2A2A_HUMAN; H2A2C_HUMAN; H2A3_HUMAN; Q08AJ9_HUMAN; Q98TM1_HUMAN; Q9NV63_HUMAN A2A418_HUMAN; GELS_HUMAN; Q5T012_HUMAN |
| 205                        | IPI00026314; IPI00646773                                                                                                                      | SH3BGR QARS                                                                                                                                                    | 239                                  | 239  | 239  | 2.6E+04                               | 2.6E+04 | 2.6E+04 | 23.9            | 4                     | 0         | 0         | 1        | 1         | ISOFORM 1 OF ADENYLOSUCCINATE LYASE.                                                                                                                                                                                                                                                                                                                           | Q98BR8 Q53HS0; Q96AW5 Q75495; P30566; Q5T134; Q71UA4 P47985; Q6NVX5; Q9JPH2                                                                                                                                                                                                                                                                                | Q53Y47_HUMAN; SH3BG_HUMAN Q53HS0_HUMAN; Q96AW5_HUMAN                                                                                                                                                             |
| 206                        | IPI00026538                                                                                                                                   | ADSL                                                                                                                                                           | 484                                  | 484  | 484  | 5.5E+04                               | 5.5E+04 | 5.5E+04 | 32.2            | 10                    | 1         | 1         | 1        | 1         | UBIQUINOL-CYTOCHROME C REDUCTASE IRON-SULFUR SUBUNIT, MITOCHONDRIAL PRECURSOR.                                                                                                                                                                                                                                                                                 | Q98BR8 Q53HS0; Q96AW5 Q75495; P30566; Q5T134; Q71UA4 P47985; Q6NVX5; Q9JPH2                                                                                                                                                                                                                                                                                | PUR8_HUMAN; Q71UA4_HUMAN                                                                                                                                                                                         |
| 207                        | IPI00026685                                                                                                                                   | UQCGRFS1                                                                                                                                                       | 274                                  | 274  | 274  | 3.0E+04                               | 3.0E+04 | 3.0E+04 | 21.5            | 5                     | 1         | 1         | 1        | 1         | TU TRANSLATION ELONGATION FACTOR, MITOCHONDRIAL.                                                                                                                                                                                                                                                                                                               | Q98BR8 Q53HS0; Q96AW5 Q75495; P30566; Q5T134; Q71UA4 P47985; Q6NVX5; Q9JPH2                                                                                                                                                                                                                                                                                | UCR1_HUMAN                                                                                                                                                                                                       |
| 208                        | IPI00026904                                                                                                                                   | TUFM                                                                                                                                                           | 455                                  | 455  | 455  | 5.0E+04                               | 5.0E+04 | 5.0E+04 | 44.2            | 15                    | 1         | 1         | 1        | 1         | GLUTAMATE DEHYDROGENASE 2, MITOCHONDRIAL PRECURSOR.                                                                                                                                                                                                                                                                                                            | P49448; Q9BSD0; Q9JUD04 P14625; Q59FC6; Q5CAQ5; Q96A97; Q96GW1 Q2YDA4; Q7KYU3; Q92978; Q99623; Q98XV3 P14649                                                                                                                                                                                                                                               | DHE4_HUMAN; Q9BSD0_HUMAN ENPL_HUMAN; Q59FC6_HUMAN; Q5CAQ5_HUMAN; Q96GW1_HUMAN                                                                                                                                    |
| 209                        | IPI00026964                                                                                                                                   | GLUD2                                                                                                                                                          | 558                                  | 558  | 558  | 6.1E+04                               | 6.1E+04 | 6.1E+04 | 3.4             | 2                     | 0         | 0         | 1        | 0         | ENDOPLASMIN PRECURSOR.                                                                                                                                                                                                                                                                                                                                         | P49448; Q9BSD0; Q9JUD04 P14625; Q59FC6; Q5CAQ5; Q96A97; Q96GW1 Q2YDA4; Q7KYU3; Q92978; Q99623; Q98XV3 P14649                                                                                                                                                                                                                                               | PHB2_HUMAN; Q9BXV3_HUMAN MYL6B_HUMAN                                                                                                                                                                             |
| 210                        | IPI00027107                                                                                                                                   | PHB2                                                                                                                                                           | 299                                  | 299  | 299  | 3.3E+04                               | 3.3E+04 | 3.3E+04 | 37.1            | 10                    | 1         | 1         | 1        | 1         | PROHIBITIN-2.                                                                                                                                                                                                                                                                                                                                                  | Q98XV3 P14649                                                                                                                                                                                                                                                                                                                                              | PHB2_HUMAN; Q9BXV3_HUMAN MYL6B_HUMAN                                                                                                                                                                             |
| 211                        | IPI00027146                                                                                                                                   | MYL6; MYL6B                                                                                                                                                    | 208                                  | 208  | 208  | 2.3E+04                               | 2.3E+04 | 2.3E+04 | 45.7            | 9                     | 1         | 1         | 1        | 1         | MYOSIN LIGHT POLYPEPTIDE 6B.                                                                                                                                                                                                                                                                                                                                   | Q98XV3 P14649                                                                                                                                                                                                                                                                                                                                              | PHB2_HUMAN; Q9BXV3_HUMAN MYL6B_HUMAN                                                                                                                                                                             |
| 212                        | IPI00027230                                                                                                                                   | HSP90B1                                                                                                                                                        | 803                                  | 803  | 803  | 9.2E+04                               | 9.2E+04 | 9.2E+04 | 10.1            | 7                     | 1         | 1         | 1        | 1         | ENDOPLASMIN PRECURSOR.                                                                                                                                                                                                                                                                                                                                         | Q98XV3 P14649                                                                                                                                                                                                                                                                                                                                              | PHB2_HUMAN; Q9BXV3_HUMAN MYL6B_HUMAN                                                                                                                                                                             |
| 213                        | IPI00027252                                                                                                                                   | PHB2                                                                                                                                                           | 299                                  | 299  | 299  | 3.3E+04                               | 3.3E+04 | 3.3E+04 | 37.1            | 10                    | 1         | 1         | 1        | 1         | PROHIBITIN-2.                                                                                                                                                                                                                                                                                                                                                  | Q98XV3 P14649                                                                                                                                                                                                                                                                                                                                              | PHB2_HUMAN; Q9BXV3_HUMAN MYL6B_HUMAN                                                                                                                                                                             |
| 214                        | IPI00027255                                                                                                                                   | MYL6; MYL6B                                                                                                                                                    | 208                                  | 208  | 208  | 2.3E+04                               | 2.3E+04 | 2.3E+04 | 45.7            | 9                     | 1         | 1         | 1        | 1         | MYOSIN LIGHT POLYPEPTIDE 6B.                                                                                                                                                                                                                                                                                                                                   | Q98XV3 P14649                                                                                                                                                                                                                                                                                                                                              | PHB2_HUMAN; Q9BXV3_HUMAN MYL6B_HUMAN                                                                                                                                                                             |

| Protein Group <sup>a</sup> | IPI ID                                                          | IPI gene name | Amino Acids in Sequence <sup>b</sup> |      |      | Protein Molecular Weight <sup>c</sup> |         |         | Seq. Cov. (max) | Unique Peptides (max) | Detection |           |          |           | Protein name                                                                                                                                                                                                                                                          | Uniprot Id                                                                                                                                                                         | Uniprot Entry Name                                                               |
|----------------------------|-----------------------------------------------------------------|---------------|--------------------------------------|------|------|---------------------------------------|---------|---------|-----------------|-----------------------|-----------|-----------|----------|-----------|-----------------------------------------------------------------------------------------------------------------------------------------------------------------------------------------------------------------------------------------------------------------------|------------------------------------------------------------------------------------------------------------------------------------------------------------------------------------|----------------------------------------------------------------------------------|
|                            |                                                                 |               | Min.                                 | Max. | Mean | Min.                                  | Max.    | Mean    |                 |                       | Expt. I-1 | Expt. I-2 | Expt. II | Expt. III |                                                                                                                                                                                                                                                                       |                                                                                                                                                                                    |                                                                                  |
| 215                        | IPI00027350; IPI00375400                                        | PRDX2         | 148                                  | 198  | 173  | 1.6E+04                               | 2.2E+04 | 1.9E+04 | 58.8            | 11                    | 1         | 1         | 1        | 1         | PEROXIREDOXIN-2.; 16 KDA PROTEIN.                                                                                                                                                                                                                                     | P31945; P32118; P32119; P35701; Q6FH54; Q92763 Q75964; Q96BV6; Q9UBZ7                                                                                                              | ; PRDX2_HUMAN                                                                    |
| 216                        | IPI00027448                                                     | ATP5L         | 103                                  | 103  | 103  | 1.1E+04                               | 1.1E+04 | 1.1E+04 | 54.4            | 7                     | 1         | 0         | 1        | 1         | ATP SYNTHASE SUBUNIT G, MITOCHONDRIAL.                                                                                                                                                                                                                                | Q9UBZ7                                                                                                                                                                             | ATP5L_HUMAN                                                                      |
| 217                        | IPI00027487                                                     | CKM           | 381                                  | 381  | 381  | 4.3E+04                               | 4.3E+04 | 4.3E+04 | 59.8            | 46                    | 1         | 1         | 1        | 1         | CREATINE KINASE M-TYPE.                                                                                                                                                                                                                                               | P06732; Q96QL9 P06744; Q9BRD3; Q9BSK5; Q9UHE6 P58461; P81605; Q53YJ2                                                                                                               | KCRM_HUMAN                                                                       |
| 218                        | IPI00027497                                                     | GPI           | 558                                  | 558  | 558  | 6.3E+04                               | 6.3E+04 | 6.3E+04 | 47.0            | 24                    | 1         | 1         | 1        | 1         | GLUCOSE-6-PHOSPHATE ISOMERASE.                                                                                                                                                                                                                                        | Q9BSK5; Q9UHE6 P58461; P81605; Q53YJ2                                                                                                                                              | G6PI_HUMAN; Q9BRD3_HUMAN                                                         |
| 219                        | IPI00027547                                                     | DCD           | 110                                  | 110  | 110  | 1.1E+04                               | 1.1E+04 | 1.1E+04 | 22.7            | 3                     | 0         | 0         | 1        | 0         | DERMCDIN PRECURSOR.                                                                                                                                                                                                                                                   | P16298; P16299; Q5F2F8; Q5F2F9; Q8N1F0; Q8N3W4; Q9UMB2                                                                                                                             | DCD_HUMAN; Q53YJ2_HUMAN                                                          |
| 220                        | IPI00027809; IPI00181738; IPI00218862; IPI00748557              | PPP3CB        | 496                                  | 525  | 512  | 5.6E+04                               | 5.9E+04 | 5.8E+04 | 10.3            | 4                     | 1         | 1         | 1        | 1         | PROTEASOME SUBUNIT BETA TYPE 3.; 13 KDA PROTEIN.; 12 KDA PROTEIN.                                                                                                                                                                                                     | P16298; P16299; Q5F2F8; Q5F2F9; Q8N1F0; Q8N3W4; Q9UMB2 P31147; P49720; Q0P6J7; Q96E27 Q60924; Q60940; P49821; Q16104; Q53G70; Q6IBR3; Q95BF8; Q96H37; Q96ID4                       | PP2B_HUMAN; Q5F2F8_HUMAN; Q5F2F9_HUMAN; Q8N1F0_HUMAN; Q9UMB2_HUMAN               |
| 221                        | IPI00028004; IPI00788896; IPI00789577                           | PSMB3         | 107                                  | 205  | 141  | 1.2E+04                               | 2.3E+04 | 1.6E+04 | 19.0            | 3                     | 0         | 0         | 1        | 0         | ISOFORM 1 OF NADH DEHYDROGENASE [UBIQUINONE] FLAVOPROTEIN 1.MITOCHONDRIAL PRECURSOR.; ISOFORM 2 OF NADH DEHYDROGENASE [UBIQUINONE] FLAVOPROTEIN 1.MITOCHONDRIAL PRECURSOR.                                                                                            | P49821; Q16104; Q53G70; Q6IBR3; Q95BF8; Q96H37; Q96ID4 Q96DN2; Q8IXW6 P24539; Q08E70; Q53GB3; Q5QNZ2; Q9BQ68; Q9BRU8 P08574; Q5U062; Q6FH57; Q8TB76 Q95298; Q549M5; Q6FIH8; Q9UBJ9 | ; PSB3_HUMAN                                                                     |
| 222                        | IPI00028520; IPI00221298                                        | NDUFV1        | 455                                  | 464  | 460  | 5.0E+04                               | 5.1E+04 | 5.0E+04 | 24.1            | 12                    | 1         | 1         | 1        | 1         | ATP SYNTHASE B CHAIN, MITOCHONDRIAL PRECURSOR.; ATP SYNTHASE, H+ TRANSPORTING, MITOCHONDRIAL F0 COMPLEX, SUBUNIT B1.                                                                                                                                                  | P49821; Q16104; Q53G70; Q6IBR3; Q95BF8; Q96H37; Q96ID4 Q96DN2; Q8IXW6 P24539; Q08E70; Q53GB3; Q5QNZ2; Q9BQ68; Q9BRU8 P08574; Q5U062; Q6FH57; Q8TB76 Q95298; Q549M5; Q6FIH8; Q9UBJ9 | NDUV1_HUMAN; Q53G70_HUMAN; Q6IBR3_HUMAN; Q96ID4_HUMAN Q6EN2_HUMAN; Q8IXW6_HUMAN  |
| 223                        | IPI00029111                                                     | DPYSL3        | 684                                  | 684  | 684  | 7.4E+04                               | 7.4E+04 | 7.4E+04 | 15.8            | 7                     | 1         | 1         | 1        | 1         | ATP SYNTHASE B CHAIN, MITOCHONDRIAL PRECURSOR.; ATP SYNTHASE, H+ TRANSPORTING, MITOCHONDRIAL F0 COMPLEX, SUBUNIT B1.                                                                                                                                                  | P49821; Q16104; Q53G70; Q6IBR3; Q95BF8; Q96H37; Q96ID4 Q96DN2; Q8IXW6 P24539; Q08E70; Q53GB3; Q5QNZ2; Q9BQ68; Q9BRU8 P08574; Q5U062; Q6FH57; Q8TB76 Q95298; Q549M5; Q6FIH8; Q9UBJ9 | NDUV1_HUMAN; Q53G70_HUMAN; Q6IBR3_HUMAN; Q96ID4_HUMAN Q6EN2_HUMAN; Q8IXW6_HUMAN  |
| 224                        | IPI00029133; IPI00456747                                        | ATP5F1        | 195                                  | 256  | 226  | 2.2E+04                               | 2.9E+04 | 2.6E+04 | 35.6            | 9                     | 1         | 1         | 1        | 1         | ATP SYNTHASE B CHAIN, MITOCHONDRIAL PRECURSOR.; ATP SYNTHASE, H+ TRANSPORTING, MITOCHONDRIAL F0 COMPLEX, SUBUNIT B1.                                                                                                                                                  | P24539; Q08E70; Q53GB3; Q5QNZ2; Q9BQ68; Q9BRU8 P08574; Q5U062; Q6FH57; Q8TB76 Q95298; Q549M5; Q6FIH8; Q9UBJ9                                                                       | AT5F1_HUMAN; Q08E70_HUMAN; Q53GB3_HUMAN; Q5QNZ2_HUMAN                            |
| 225                        | IPI00029264                                                     | CYC1          | 325                                  | 325  | 325  | 3.5E+04                               | 3.5E+04 | 3.5E+04 | 16.3            | 5                     | 0         | 0         | 1        | 1         | CYTOCHROME C1 HEME PROTEIN, MITOCHONDRIAL PRECURSOR.                                                                                                                                                                                                                  | Q95298; Q549M5; Q6FIH8; Q9UBJ9                                                                                                                                                     | CY1_HUMAN; Q8TB76_HUMAN                                                          |
| 226                        | IPI00029558                                                     | NDUFC2        | 119                                  | 119  | 119  | 1.4E+04                               | 1.4E+04 | 1.4E+04 | 16.8            | 2                     | 0         | 0         | 1        | 1         | NADH DEHYDROGENASE [UBIQUINONE] 1 SUBUNIT C2.                                                                                                                                                                                                                         | Q95298; Q549M5; Q6FIH8; Q9UBJ9                                                                                                                                                     | NDUC2_HUMAN; Q549M5_HUMAN; Q6FIH8_HUMAN                                          |
| 227                        | IPI00029561                                                     | NDUFA10       | 355                                  | 355  | 355  | 4.1E+04                               | 4.1E+04 | 4.1E+04 | 15.8            | 6                     | 1         | 1         | 1        | 0         | NADH DEHYDROGENASE [UBIQUINONE] 1 ALPHA SUBCOMPLEX SUBUNIT 10.MITOCHONDRIAL PRECURSOR.                                                                                                                                                                                | Q95299; Q53QE8; Q53SW4; Q7Z518 P34062; P60900; Q6IB60; Q9BZ93 Q12840; Q4LE26 A1L4G9; Q14324 Q14353; Q53Y34; Q8WVJ1                                                                 | NDUAA_HUMAN; Q53QE8_HUMAN; Q53SW4_HUMAN; Q7Z518_HUMAN                            |
| 228                        | IPI00029623                                                     | PSMA6         | 246                                  | 246  | 246  | 2.7E+04                               | 2.7E+04 | 2.7E+04 | 14.2            | 3                     | 0         | 0         | 1        | 1         | PROTEASOME SUBUNIT ALPHA TYPE 6.                                                                                                                                                                                                                                      | Q6IB60; Q9BZ93 Q12840; Q4LE26 A1L4G9; Q14324 Q14353; Q53Y34; Q8WVJ1                                                                                                                | PSA6_HUMAN; Q9BZ93_HUMAN                                                         |
| 229                        | IPI00029722                                                     | KIF5A         | 1032                                 | 1032 | 1032 | 1.2E+05                               | 1.2E+05 | 1.2E+05 | 2.4             | 2                     | 0         | 0         | 1        | 0         | KINESIN HEAVY CHAIN ISOFORM 5A.                                                                                                                                                                                                                                       | Q12840; Q4LE26 A1L4G9; Q14324 Q14353; Q53Y34; Q8WVJ1                                                                                                                               | KIF5A_HUMAN                                                                      |
| 230                        | IPI00030104                                                     | MYBPC2        | 1142                                 | 1142 | 1142 | 1.3E+05                               | 1.3E+05 | 1.3E+05 | 43.4            | 47                    | 1         | 1         | 1        | 1         | MYOSIN-BINDING PROTEIN C, FAST-TYPE.                                                                                                                                                                                                                                  | A1L4G9; Q14324 Q14353; Q53Y34; Q8WVJ1                                                                                                                                              | A1L4G9_HUMAN; MYPC2_HUMAN                                                        |
| 231                        | IPI00030182                                                     | GAMT          | 236                                  | 236  | 236  | 2.6E+04                               | 2.6E+04 | 2.6E+04 | 18.6            | 3                     | 0         | 0         | 1        | 0         | GUANIDINOACETATE N-METHYLTRANSFERASE.                                                                                                                                                                                                                                 | Q8WVJ1                                                                                                                                                                             | GAMT_HUMAN                                                                       |
| 232                        | IPI00030275                                                     | TRAP1         | 704                                  | 704  | 704  | 8.0E+04                               | 8.0E+04 | 8.0E+04 | 16.8            | 8                     | 1         | 1         | 1        | 1         | HEAT SHOCK PROTEIN 75 KDA, MITOCHONDRIAL PRECURSOR.                                                                                                                                                                                                                   | Q43642; Q75235; Q12931; Q53F56; Q53G55; Q59EK6; Q5CAQ4; Q8N9Z3; Q9BV11; Q9UH55                                                                                                     | TRAP1_HUMAN                                                                      |
| 233                        | IPI00030363                                                     | ACAT1         | 427                                  | 427  | 427  | 4.5E+04                               | 4.5E+04 | 4.5E+04 | 53.6            | 24                    | 1         | 1         | 1        | 1         | ACETYL-COA ACETYLTRANSFERASE, MITOCHONDRIAL PRECURSOR.                                                                                                                                                                                                                | P24752                                                                                                                                                                             | THL1_HUMAN                                                                       |
| 234                        | IPI00030405                                                     | HSPB3         | 150                                  | 150  | 150  | 1.7E+04                               | 1.7E+04 | 1.7E+04 | 16.0            | 2                     | 0         | 0         | 1        | 0         | HEAT-SHOCK PROTEIN BETA-3.                                                                                                                                                                                                                                            | Q12988; Q6IC59                                                                                                                                                                     | HSPB3_HUMAN; Q6IC59_HUMAN                                                        |
| 235                        | IPI00030702; IPI00607898; IPI00792971; IPI00795359; IPI00795821 | IDH3A         | 217                                  | 366  | 304  | 2.3E+04                               | 4.0E+04 | 3.3E+04 | 21.0            | 6                     | 1         | 1         | 1        | 0         | ISOFORM 1 OF ISOCITRATE DEHYDROGENASE [NAD] SUBUNIT ALPHA.MITOCHONDRIAL PRECURSOR.; ISOFORM 2 OF ISOCITRATE DEHYDROGENASE [NAD] SUBUNIT ALPHA.MITOCHONDRIAL PRECURSOR.; ISOCITRATE DEHYDROGENASE 3 (NAD+) ALPHA VARIANT (FRAGMENT).; 28 KDA PROTEIN.; 23 KDA PROTEIN. | P50213; Q53GF8; Q9HX30 Q95479; Q4TT33; Q66135; Q68D73                                                                                                                              | ; IDH3A_HUMAN; Q53GF8_HUMAN                                                      |
| 236                        | IPI00030828; IPI00607861                                        | H6PD          | 791                                  | 802  | 797  | 8.9E+04                               | 9.0E+04 | 9.0E+04 | 3.4             | 2                     | 0         | 1         | 1        | 0         | 90 KDA PROTEIN.; GDH/6PGL ENDOPLASMIC BIFUNCTIONAL PROTEIN PRECURSOR.                                                                                                                                                                                                 | Q66135; Q68D73                                                                                                                                                                     | ; G6PE_HUMAN                                                                     |
| 237                        | IPI00030986; IPI00220297                                        | KBTBD10       | 596                                  | 606  | 601  | 6.7E+04                               | 6.8E+04 | 6.7E+04 | 15.7            | 8                     | 1         | 1         | 1        | 1         | ISOFORM LONG OF KELCH REPEAT AND BTB DOMAIN-CONTAINING PROTEIN 10.; ISOFORM SHORT OF KELCH REPEAT AND BTB DOMAIN-CONTAINING PROTEIN 10.                                                                                                                               | O60662; Q3ZT56; Q53R42 Q65846; Q6YN16; Q9BT58 Q75546; P08886; P61019                                                                                                               | KBTBA_HUMAN; Q3ZT56_HUMAN; Q53R42_HUMAN Q65846_HUMAN; Q6YN16_HUMAN; Q9BT58_HUMAN |
| 238                        | IPI00031107; IPI00414384                                        | HSDL2         | 345                                  | 418  | 382  | 3.7E+04                               | 4.5E+04 | 4.1E+04 | 23.9            | 8                     | 1         | 1         | 1        | 1         | HSDL2 PROTEIN.; HYDROXYSTEROID DEHYDROGENASE LIKE PROTEIN.                                                                                                                                                                                                            | Q9BT58 Q75546; P08886; P61019                                                                                                                                                      | Q9BT58_HUMAN                                                                     |
| 239                        | IPI00031169                                                     | RAB2A         | 212                                  | 212  | 212  | 2.4E+04                               | 2.4E+04 | 2.4E+04 | 19.3            | 3                     | 0         | 0         | 1        | 1         | RAS-RELATED PROTEIN RAB-2A.                                                                                                                                                                                                                                           | Q95573; Q60192; Q6PIM8; Q8IUM9 Q43928; P50395; Q6IAT1; Q9UQM6 P40939; Q16679; Q53T69; Q3TA2; Q95G17; Q9UCQ5 Q9BVC6                                                                 | O75546_HUMAN; RAB2A_HUMAN                                                        |
| 240                        | IPI00031397                                                     | ACSL3         | 720                                  | 720  | 720  | 8.0E+04                               | 8.0E+04 | 8.0E+04 | 8.6             | 4                     | 1         | 1         | 1        | 0         | LONG-CHAIN-FATTY-ACID-COA LIGASE 3.                                                                                                                                                                                                                                   | Q95573; Q60192; Q6PIM8; Q8IUM9 Q43928; P50395; Q6IAT1; Q9UQM6 P40939; Q16679; Q53T69; Q3TA2; Q95G17; Q9UCQ5 Q9BVC6                                                                 | ACSL3_HUMAN; Q6PIM8_HUMAN                                                        |
| 241                        | IPI00031461                                                     | GDI2          | 445                                  | 445  | 445  | 5.1E+04                               | 5.1E+04 | 5.1E+04 | 31.2            | 11                    | 1         | 1         | 1        | 1         | RAB GDP DISSOCIATION INHIBITOR BETA.                                                                                                                                                                                                                                  | Q6IAT1; Q9UQM6 P40939; Q16679; Q53T69; Q3TA2; Q95G17; Q9UCQ5 Q9BVC6                                                                                                                | GDIB_HUMAN; Q6IAT1_HUMAN                                                         |
| 242                        | IPI00031522                                                     | HADHA         | 763                                  | 763  | 763  | 8.3E+04                               | 8.3E+04 | 8.3E+04 | 48.4            | 34                    | 1         | 1         | 1        | 1         | TRIFUNCTIONAL ENZYME SUBUNIT ALPHA, MITOCHONDRIAL PRECURSOR.                                                                                                                                                                                                          | P40939; Q16679; Q53T69; Q3TA2; Q95G17; Q9UCQ5 Q9BVC6                                                                                                                               | ECHA_HUMAN; Q53T69_HUMAN; Q53TA2_HUMAN; Q9UCQ5_HUMAN                             |
| 243                        | IPI00031697                                                     | TMEM109       | 243                                  | 243  | 243  | 2.6E+04                               | 2.6E+04 | 2.6E+04 | 5.4             | 2                     | 0         | 0         | 1        | 0         | TRANSMEMBRANE PROTEIN 109 PRECURSOR.                                                                                                                                                                                                                                  | Q9BVC6                                                                                                                                                                             | TM109_HUMAN                                                                      |
| 244                        | IPI00031804; IPI00294779                                        | VDAC3         | 283                                  | 284  | 284  | 3.1E+04                               | 3.1E+04 | 3.1E+04 | 28.3            | 7                     | 1         | 0         | 1        | 1         | ISOFORM 1 OF VOLTAGE-DEPENDENT ANION-SELECTIVE CHANNEL PROTEIN 3.; ISOFORM 2 OF VOLTAGE-DEPENDENT ANION-SELECTIVE CHANNEL PROTEIN 3.                                                                                                                                  | Q9UIS0; Q9Y277 Q08043; Q4JCP9; Q4KKV2; Q4VAM3                                                                                                                                      | VDAC3_HUMAN                                                                      |
| 245                        | IPI00032137                                                     | ACTN3         | 901                                  | 901  | 901  | 1.0E+05                               | 1.0E+05 | 1.0E+05 | 17.9            | 13                    | 0         | 0         | 1        | 1         | ALPHA-ACTININ-3.                                                                                                                                                                                                                                                      | Q08043; Q4JCP9; Q4KKV2; Q4VAM3                                                                                                                                                     | ACTN3_HUMAN; Q4JCP9_HUMAN; Q4VAM3_HUMAN                                          |
| 246                        | IPI00032195                                                     | HSPB2         | 307                                  | 307  | 307  | 3.3E+04                               | 3.3E+04 | 3.3E+04 | 20.2            | 4                     | 0         | 0         | 1        | 1         | HEAT-SHOCK PROTEIN BETA-2.                                                                                                                                                                                                                                            |                                                                                                                                                                                    |                                                                                  |

| Protein Group <sup>a</sup> | IPI ID                                                                        | IPI gene name       | Amino Acids in Sequence <sup>b</sup> |      |      | Protein Molecular Weight <sup>c</sup> |         |         | Seq. Cov. (max) | Unique Peptides (max) | Detection |           |          |           | Protein name                                                                                                                                                                                     | Uniprot Id                                                                                                                                                                                         | Uniprot Entry Name                                                                                                                                                    |
|----------------------------|-------------------------------------------------------------------------------|---------------------|--------------------------------------|------|------|---------------------------------------|---------|---------|-----------------|-----------------------|-----------|-----------|----------|-----------|--------------------------------------------------------------------------------------------------------------------------------------------------------------------------------------------------|----------------------------------------------------------------------------------------------------------------------------------------------------------------------------------------------------|-----------------------------------------------------------------------------------------------------------------------------------------------------------------------|
|                            |                                                                               |                     | Min.                                 | Max. | Mean | Min.                                  | Max.    | Mean    |                 |                       | Expt. I-1 | Expt. I-2 | Expt. II | Expt. III |                                                                                                                                                                                                  |                                                                                                                                                                                                    |                                                                                                                                                                       |
| 247                        | IPI00032450; IPI00783617                                                      | ASPH                | 210                                  | 225  | 218  | 2.4E+04                               | 2.6E+04 | 2.5E+04 | 12.9            | 2                     | 0         | 0         | 1        | 0         | ASPARTATE BETA-HYDROXYLASE ISOFORM D.; ASPARTATE BETA-HYDROXYLASE ISOFORM E.                                                                                                                     | Q9NR10; Q9NR11<br>Q63R7; Q7Z4X0;<br>Q9Y376                                                                                                                                                         | Q9NR10_HUMAN; Q9NR11_HUMAN<br>CA839_HUMAN; Q53R7_HUMAN;<br>Q7Z4X0_HUMAN                                                                                               |
| 248                        | IPI00032561                                                                   | CAB39               | 341                                  | 341  | 341  | 4.0E+04                               | 4.0E+04 | 4.0E+04 | 17.9            | 6                     | 1         | 1         | 1        | 0         | CALCIUM-BINDING PROTEIN 39.                                                                                                                                                                      | A0AUJ6; O14999;<br>P50502; Q0U56;<br>Q1XBUE; Q1XBU7;<br>Q2TU77; Q3KNR6;<br>Q8NF14                                                                                                                  | A0AUJ6_HUMAN; F10A1_HUMAN;<br>F10A5_HUMAN; Q0U56_HUMAN;<br>Q1XBUE_HUMAN; Q1XBU7_HUMAN;<br>Q2TU77_HUMAN; Q3KNR6_HUMAN                                                  |
| 249                        | IPI00032826; IPI00168839                                                      | FAM10A5; ST13       | 369                                  | 369  | 369  | 4.1E+04                               | 4.1E+04 | 4.1E+04 | 16.5            | 5                     | 1         | 1         | 1        | 1         | HSC70-INTERACTING PROTEIN.; PROTEIN FAM10A5.                                                                                                                                                     |                                                                                                                                                                                                    |                                                                                                                                                                       |
| 250                        | IPI00032875; IPI00455179                                                      | ETFDH               | 584                                  | 617  | 601  | 6.5E+04                               | 6.9E+04 | 6.7E+04 | 19.6            | 9                     | 1         | 1         | 1        | 1         | ISOFORM 1 OF ELECTRON TRANSFER FLAVOPROTEIN-UBIQUINONE OXIDOREDUCTASE, MITOCHONDRIAL PRECURSOR.; ISOFORM 2 OF ELECTRON TRANSFER FLAVOPROTEIN-UBIQUINONE OXIDOREDUCTASE, MITOCHONDRIAL PRECURSOR. | O16134; Q547S8;<br>Q7Z347<br>Q14702; Q8N335;<br>Q9BRM5                                                                                                                                             | ETFD_HUMAN; Q547S8_HUMAN<br>Q14702_HUMAN; Q8N335_HUMAN;<br>Q9BRM5_HUMAN                                                                                               |
| 251                        | IPI00032959                                                                   | GPD1L               | 351                                  | 351  | 351  | 3.8E+04                               | 3.8E+04 | 3.8E+04 | 16.8            | 6                     | 0         | 0         | 1        | 1         | GLYCEROL-3-PHOSPHATE DEHYDROGENASE 1-LIKE.                                                                                                                                                       |                                                                                                                                                                                                    |                                                                                                                                                                       |
| 252                        | IPI00033022; IPI00181352; IPI00218889; IPI00477431; IPI00514550; IPI00743573; | DNM2                | 866                                  | 872  | 869  | 9.8E+04                               | 9.8E+04 | 9.8E+04 | 4.2             | 3                     | 0         | 1         | 1        | 0         | ISOFORM 1 OF DYNAMIN-2.; DYNAMIN 2 ISOFORM 4.; ISOFORM 2 OF DYNAMIN-2.; 98 KDA PROTEIN.; DYNAMIN 2 ISOFORM 2.; 98 KDA PROTEIN.; 98 KDA PROTEIN.                                                  | P50570; Q5I0Y0;<br>Q7Z553; Q8N1K8;<br>Q9UPH4; Q9UPH5<br>P50579                                                                                                                                     | ; DYN2_HUMAN; Q8N1K8_HUMAN;<br>Q9UPH5_HUMAN<br>AMPM2_HUMAN                                                                                                            |
| 253                        | IPI00033036                                                                   | METAP2              | 478                                  | 478  | 478  | 5.3E+04                               | 5.3E+04 | 5.3E+04 | 7.3             | 3                     | 0         | 0         | 1        | 0         | METHIONINE AMINOPEPTIDASE 2.                                                                                                                                                                     |                                                                                                                                                                                                    |                                                                                                                                                                       |
| 254                        | IPI00033494; IPI00220573; IPI00604523; IPI00719669                            | MRCL3; MRLC2        | 171                                  | 177  | 173  | 2.0E+04                               | 2.0E+04 | 2.0E+04 | 11.6            | 2                     | 0         | 0         | 1        | 0         | MYOSIN REGULATORY LIGHT CHAIN.; MYOSIN REGULATORY LIGHT CHAIN 2, NONSARCOMERIC.; MYOSIN REGULATORY LIGHT CHAIN MRCL3 VARIANT.; SIMILAR TO MYOSIN REGULATORY LIGHT CHAIN MRCL2.                   | O14950; P19105;<br>Q13182; Q2F834;<br>Q53HL1; Q53X45;<br>Q7Z524<br>O00429; O14541;<br>O60709; Q32Q67;<br>Q59GN9; Q7L6B3;<br>Q8TB77; Q9BWM1;<br>Q9Y5J2                                              | MLRM_HUMAN; O14950_HUMAN;<br>Q13182_HUMAN; Q2F834_HUMAN;<br>Q53HL1_HUMAN; Q53X45_HUMAN;<br>Q7Z524_HUMAN                                                               |
| 255                        | IPI00037283; IPI00146935; IPI00235412; IPI00473085; IPI00555883               | DNM1L               | 699                                  | 736  | 716  | 7.8E+04                               | 8.2E+04 | 8.0E+04 | 28.3            | 13                    | 1         | 1         | 1        | 0         | ISOFORM 5 OF DYNAMIN-1-LIKE PROTEIN.; ISOFORM 1 OF DYNAMIN-1-LIKE PROTEIN.; ISOFORM 3 OF DYNAMIN-1-LIKE PROTEIN.; ISOFORM 4 OF DYNAMIN-1-LIKE PROTEIN.; ISOFORM 2 OF DYNAMIN-1-LIKE PROTEIN.     | O60709; Q32Q67;<br>Q59GN9; Q7L6B3;<br>Q8TB77; Q9BWM1;<br>Q9Y5J2                                                                                                                                    | DNM1L_HUMAN; Q32Q67_HUMAN;<br>Q59GN9_HUMAN                                                                                                                            |
| 256                        | IPI00044608                                                                   | KIAA1881            | 1357                                 | 1357 | 1357 | 1.3E+05                               | 1.3E+05 | 1.3E+05 | 16.2            | 15                    | 1         | 0         | 1        | 0         | PLASMA MEMBRANE ASSOCIATED PROTEIN, S3-12.                                                                                                                                                       |                                                                                                                                                                                                    |                                                                                                                                                                       |
| 257                        | IPI00062037                                                                   | DYNLL2              | 89                                   | 89   | 89   | 1.0E+04                               | 1.0E+04 | 1.0E+04 | 20.2            | 2                     | 0         | 0         | 1        | 0         | DYNEIN LIGHT CHAIN 2, CYTOPLASMIC.                                                                                                                                                               |                                                                                                                                                                                                    |                                                                                                                                                                       |
| 258                        | IPI00063234; IPI00219774                                                      | PRKAR2A             | 382                                  | 404  | 393  | 4.3E+04                               | 4.6E+04 | 4.4E+04 | 47.6            | 13                    | 1         | 1         | 1        | 1         | PRKAR2A PROTEIN.; CAMP-DEPENDENT PROTEIN KINASE TYPE II-ALPHA REGULATORY SUBUNIT.                                                                                                                | Q96FJ2<br>P13861; O16823;<br>Q9BUB1                                                                                                                                                                | DYL2_HUMAN<br>KAP2_HUMAN; Q9BUB1_HUMAN                                                                                                                                |
| 259                        | IPI00063827                                                                   | ABHD14B             | 210                                  | 210  | 210  | 2.2E+04                               | 2.2E+04 | 2.2E+04 | 17.6            | 3                     | 0         | 0         | 1        | 1         | ISOFORM 1 OF ABHYDROLASE DOMAIN-CONTAINING PROTEIN 14B.                                                                                                                                          | Q86VK8; Q8N8W5;<br>Q96IU4                                                                                                                                                                          | ABHEB_HUMAN                                                                                                                                                           |
| 260                        | IPI00063903; IPI00640630                                                      | USMG5               | 58                                   | 58   | 58   | 6.5E+03                               | 6.6E+03 | 6.5E+03 | 44.8            | 4                     | 0         | 0         | 1        | 1         | UP-REGULATED DURING SKELETAL MUSCLE GROWTH PROTEIN 5.; 7 KDA PROTEIN.                                                                                                                            | Q96IX5                                                                                                                                                                                             | ; USMG5_HUMAN                                                                                                                                                         |
| 261                        | IPI00065501                                                                   | JSRP1               | 331                                  | 331  | 331  | 3.6E+04                               | 3.6E+04 | 3.6E+04 | 21.8            | 4                     | 1         | 1         | 1        | 1         | JUNCTIONAL SARCOPLASMIC RETICULUM PROTEIN 1.                                                                                                                                                     | Q96MG2                                                                                                                                                                                             | Q96MG2_HUMAN                                                                                                                                                          |
| 262                        | IPI00069693                                                                   |                     | 215                                  | 215  | 215  | 2.3E+04                               | 2.3E+04 | 2.3E+04 | 11.6            | 2                     | 0         | 0         | 1        | 0         | SIMILAR TO RIBOSOMAL PROTEIN L14.                                                                                                                                                                | P02593; P62158;<br>P70667; P99014;<br>Q13942; Q53S29;<br>Q61379; Q61380;<br>Q96HK3; Q96HY3;<br>Q9BRL5                                                                                              | ; CALM_HUMAN; Q96HY3_HUMAN;<br>Q9BRL5_HUMAN                                                                                                                           |
| 263                        | IPI00075248; IPI00386621; IPI00794543                                         | CALM1; CALM2; CALM3 | 147                                  | 152  | 149  | 1.7E+04                               | 1.7E+04 | 1.7E+04 | 41.6            | 4                     | 0         | 0         | 1        | 1         | CALMODULIN.; CALM3 PROTEIN.; 17 KDA PROTEIN. OXOGLUTARATE (ALPHA-KETOGLUTARATE) DEHYDROGENASE (LIPOAMIDE) ISOFORM 1PRECURSOR.                                                                    | A2VCT3; Q9UDX0<br>Q94918; Q6PIY4;<br>Q86VP6; Q8NDJ4;<br>Q96JZ9; Q96T19;<br>Q9BTC4; Q9HG02;<br>Q9P0H7; Q9UFB5<br>Q6IPZ1; Q6NXS6;<br>Q7L3G6; Q9H0P0;<br>Q9P0P5; Q9UC42;<br>Q9UC43; Q9UC44;<br>Q9UC45 | A2VCT3_HUMAN; Q9UDX0_HUMAN                                                                                                                                            |
| 264                        | IPI00089902                                                                   | OGDH                | 1023                                 | 1023 | 1023 | 1.2E+05                               | 1.2E+05 | 1.2E+05 | 34.6            | 28                    | 1         | 1         | 1        | 1         | ISOFORM 1 OF CULLIN-ASSOCIATED NEDD8-DISSOCIATED PROTEIN 1.; SIMILAR TO TIP120.                                                                                                                  | Q9P0H7; Q9UFB5<br>Q6IPZ1; Q6NXS6;<br>Q7L3G6; Q9H0P0;<br>Q9P0P5; Q9UC42;<br>Q9UC43; Q9UC44;<br>Q9UC45                                                                                               |                                                                                                                                                                       |
| 265                        | IPI00100160; IPI00746694                                                      | CAND1               | 1230                                 | 1230 | 1230 | 1.4E+05                               | 1.4E+05 | 1.4E+05 | 7.9             | 7                     | 1         | 1         | 1        | 0         | ISOFORM 1 OF UPF0366 PROTEIN C11ORF67.                                                                                                                                                           | Q9P0H7; Q9UFB5<br>Q6IPZ1; Q6NXS6;<br>Q7L3G6; Q9H0P0;<br>Q9P0P5; Q9UC42;<br>Q9UC43; Q9UC44;<br>Q9UC45                                                                                               | ; CAND1_HUMAN                                                                                                                                                         |
| 266                        | IPI00100192; IPI00619911; IPI00647805; IPI00807412                            | NT5C3               | 285                                  | 336  | 301  | 3.3E+04                               | 3.8E+04 | 3.4E+04 | 20.6            | 6                     | 0         | 0         | 1        | 1         | ISOFORM 3 OF CYTOSOLIC 5'-NUCLEOTIDASE III.; ISOFORM 1 OF CYTOSOLIC 5'-NUCLEOTIDASE III.; ISOFORM 4 OF CYTOSOLIC 5'-NUCLEOTIDASE III.; ISOFORM 2 OF CYTOSOLIC 5'-NUCLEOTIDASE III.               | Q9UC45<br>Q96A04; Q9H7C9;<br>Q9Y6B1                                                                                                                                                                | SNT3_HUMAN                                                                                                                                                            |
| 267                        | IPI00100775                                                                   | C11orf67            | 122                                  | 122  | 122  | 1.3E+04                               | 1.3E+04 | 1.3E+04 | 45.1            | 5                     | 1         | 0         | 1        | 1         | ISOFORM 1 OF UPF0366 PROTEIN C11ORF67.                                                                                                                                                           | Q9Y6B1                                                                                                                                                                                             | CK067_HUMAN                                                                                                                                                           |
| 268                        | IPI00100980                                                                   | EHD2                | 543                                  | 543  | 543  | 6.1E+04                               | 6.1E+04 | 6.1E+04 | 32.2            | 13                    | 1         | 1         | 1        | 1         | EH DOMAIN-CONTAINING PROTEIN 2.                                                                                                                                                                  | Q8NCJ3; Q96CB6;<br>Q9NZN4                                                                                                                                                                          | EHD2_HUMAN; Q8NCJ3_HUMAN                                                                                                                                              |
| 269                        | IPI00007935; IPI00103146; IPI00552367; IPI00553102                            | PDLIM5              | 214                                  | 596  | 383  | 2.4E+04                               | 6.4E+04 | 4.2E+04 | 55.6            | 11                    | 1         | 1         | 1        | 1         | PDZ AND LIM DOMAIN PROTEIN 5.; PDZ AND LIM DOMAIN 5 ISOFORM E.; PDZ AND LIM DOMAIN 5 ISOFORM D.; PDZ AND LIM DOMAIN 5 ISOFORM B.                                                                 | O60705; Q4W5K9;<br>Q5UW38; Q8WVK0;<br>Q96HC4; Q9P1D1<br>P30837; Q8WX76;<br>Q9BV45                                                                                                                  | ; PDL5_HUMAN; Q4W5K9_HUMAN;<br>Q5UW38_HUMAN; Q8WVK0_HUMAN;<br>Q9P1D1_HUMAN                                                                                            |
| 270                        | IPI00103467                                                                   | ALDH1B1             | 517                                  | 517  | 517  | 5.7E+04                               | 5.7E+04 | 5.7E+04 | 30.2            | 11                    | 1         | 1         | 1        | 1         | ALDEHYDE DEHYDROGENASE X, MITOCHONDRIAL PRECURSOR.                                                                                                                                               | P30837; Q8WX76;<br>Q9BV45<br>A2RRR4; Q2TU79;<br>Q6NV14; Q9HE3;<br>Q9HAM7; Q9NPJ8;<br>Q9NSE1; Q9NVC0;<br>Q9NVP8; Q9PJ5<br>Q5T6D4; Q5T6D6;<br>Q8TCA0; Q9NVA6;<br>Q9NVG3                              | AL1B1_HUMAN<br>A2RRR4_HUMAN; Q2TU79_HUMAN;<br>Q6NV14_HUMAN; Q9HE3_HUMAN;<br>Q9HAM7_HUMAN; Q9NPJ8_HUMAN;<br>Q9NVC0_HUMAN; Q9NVP8_HUMAN;<br>Q9NVP8_HUMAN;<br>SYLC_HUMAN |
| 271                        | IPI00103994                                                                   | LARS                | 1176                                 | 1176 | 1176 | 1.3E+05                               | 1.3E+05 | 1.3E+05 | 4.2             | 4                     | 0         | 1         | 1        | 0         | LEUCYL-TRNA SYNTHETASE, CYTOPLASMIC.                                                                                                                                                             | Q9NVP8; Q9PJ5<br>Q5T6D4; Q5T6D6;<br>Q8TCA0; Q9NVA6;<br>Q9NVG3                                                                                                                                      |                                                                                                                                                                       |
| 272                        | IPI00152330; IPI00647802                                                      | LRRC20              | 175                                  | 184  | 180  | 2.0E+04                               | 2.1E+04 | 2.0E+04 | 41.3            | 7                     | 0         | 0         | 1        | 1         | ISOFORM 1 OF LEUCINE-RICH REPEAT-CONTAINING PROTEIN 20.; 20 KDA PROTEIN.                                                                                                                         | Q9BQ69; Q9UH96                                                                                                                                                                                     | ; LRC20_HUMAN                                                                                                                                                         |
| 273                        | IPI00155601                                                                   | LRP16               | 325                                  | 325  | 325  | 3.6E+04                               | 3.6E+04 | 3.6E+04 | 10.2            | 2                     | 0         | 0         | 1        | 1         | PROTEIN LRP16.                                                                                                                                                                                   |                                                                                                                                                                                                    | LRP16_HUMAN                                                                                                                                                           |
| 274                        | IPI00156282; IPI00414289                                                      | GPS1                | 491                                  | 527  | 509  | 5.6E+04                               | 5.9E+04 | 5.7E+04 | 6.3             | 3                     | 1         | 1         | 1        | 1         | G PROTEIN PATHWAY SUPPRESSOR 1 ISOFORM 2.; G PROTEIN PATHWAY SUPPRESSOR 1 ISOFORM 1.                                                                                                             |                                                                                                                                                                                                    |                                                                                                                                                                       |

| Protein Group <sup>a</sup> | IPI ID                                                                                                                                                                  | IPI gene name           | Amino Acids in Sequence <sup>b</sup> |      |      | Protein Molecular Weight <sup>c</sup> |         |         | Seq. Cov. (max) | Unique Peptides (max) | Detection |           |          |           | Protein name                                                                                                                                                                                                                                                                                                                                                                                                                                                                                                                                                                                                                                                           | Uniprot Id                                                                                                                                                                                                                                                                                                                                                                             | Uniprot Entry Name                                                                                                                                                                                                                                                                                                                                              |
|----------------------------|-------------------------------------------------------------------------------------------------------------------------------------------------------------------------|-------------------------|--------------------------------------|------|------|---------------------------------------|---------|---------|-----------------|-----------------------|-----------|-----------|----------|-----------|------------------------------------------------------------------------------------------------------------------------------------------------------------------------------------------------------------------------------------------------------------------------------------------------------------------------------------------------------------------------------------------------------------------------------------------------------------------------------------------------------------------------------------------------------------------------------------------------------------------------------------------------------------------------|----------------------------------------------------------------------------------------------------------------------------------------------------------------------------------------------------------------------------------------------------------------------------------------------------------------------------------------------------------------------------------------|-----------------------------------------------------------------------------------------------------------------------------------------------------------------------------------------------------------------------------------------------------------------------------------------------------------------------------------------------------------------|
|                            |                                                                                                                                                                         |                         | Min.                                 | Max. | Mean | Min.                                  | Max.    | Mean    |                 |                       | Expt. I-1 | Expt. I-2 | Expt. II | Expt. III |                                                                                                                                                                                                                                                                                                                                                                                                                                                                                                                                                                                                                                                                        |                                                                                                                                                                                                                                                                                                                                                                                        |                                                                                                                                                                                                                                                                                                                                                                 |
| 275                        | IPI00157144; IPI00303868                                                                                                                                                | GYS1                    | 673                                  | 737  | 705  | 7.6E+04                               | 8.4E+04 | 8.0E+04 | 29.0            | 17                    | 1         | 1         | 1        | 1         | GYS1 PROTEIN; GLYCOGEN [STARCH] SYNTHASE, MUSCLE.<br>187 KDA PROTEIN.; COMPLEMENT C3 PRECURSOR (FRAGMENT).                                                                                                                                                                                                                                                                                                                                                                                                                                                                                                                                                             | P13807; Q53ER0; Q9BTT9                                                                                                                                                                                                                                                                                                                                                                 | GYS1_HUMAN; Q53ER0_HUMAN; Q9BTT9_HUMAN                                                                                                                                                                                                                                                                                                                          |
| 276                        | IPI00164623; IPI00783987                                                                                                                                                | C3                      | 1663                                 | 1665 | 1664 | 1.9E+05                               | 1.9E+05 | 1.9E+05 | 23.8            | 24                    | 1         | 1         | 1        | 1         | 57 KDA PROTEIN.; SET AND MYND DOMAIN-CONTAINING PROTEIN 1.                                                                                                                                                                                                                                                                                                                                                                                                                                                                                                                                                                                                             | P01024; Q6LDJ0<br>A0AV30; Q5GJ32;<br>Q5GJ33; Q5HYE8;<br>Q8N12;<br>P00558; Q5J7W1;<br>Q6IBT6; Q8N187<br>Q86TT6; Q8N142;                                                                                                                                                                                                                                                                 | ; CO3_HUMAN; Q6LDJ0_HUMAN<br>; Q5GJ32_HUMAN; Q5GJ33_HUMAN;<br>Q5HYE8_HUMAN; SMYD1_HUMAN                                                                                                                                                                                                                                                                         |
| 277                        | IPI00168081; IPI00784073                                                                                                                                                | SMYD1                   | 490                                  | 493  | 492  | 5.7E+04                               | 5.7E+04 | 5.7E+04 | 29.6            | 11                    | 1         | 1         | 1        | 1         | PHOSPHOGLYCERATE KINASE 1.<br>ISOFORM 1 OF ADENYLOSUCCINATE SYNTHETASE<br>ISOZYME 1.                                                                                                                                                                                                                                                                                                                                                                                                                                                                                                                                                                                   | Q8N1714<br>Q8N1G4; Q9ULN5<br>P23788; Q6IB71;                                                                                                                                                                                                                                                                                                                                           | PGK1_HUMAN                                                                                                                                                                                                                                                                                                                                                      |
| 278                        | IPI00169383                                                                                                                                                             | PGK1                    | 417                                  | 417  | 417  | 4.5E+04                               | 4.5E+04 | 4.5E+04 | 63.6            | 29                    | 1         | 1         | 1        | 1         | ISOFORM 2 OF PROTEASOME SUBUNIT ALPHA TYPE 3;<br>ISOFORM 1 OF PROTEASOME SUBUNIT ALPHA TYPE 3.<br>COILED-COIL DOMAIN CONTAINING 109A.; CCDC109A PROTEIN.                                                                                                                                                                                                                                                                                                                                                                                                                                                                                                               | Q86L83; Q8N1D8;<br>Q9BS70                                                                                                                                                                                                                                                                                                                                                              | PSA3_HUMAN; Q6IB71_HUMAN                                                                                                                                                                                                                                                                                                                                        |
| 279                        | IPI00170914                                                                                                                                                             | ADSSL1                  | 457                                  | 457  | 457  | 5.0E+04                               | 5.0E+04 | 5.0E+04 | 48.8            | 16                    | 1         | 1         | 1        | 1         | ISOFORM 1 OF POLYMERASE I AND TRANSCRIPT RELEASE FACTOR.                                                                                                                                                                                                                                                                                                                                                                                                                                                                                                                                                                                                               | Q8NE86; Q96FL3<br>Q8NE98; Q8NHX8;<br>Q9BWH2<br>Q4KMX3; Q6AHW6;<br>Q7Z682; Q86VR1;<br>Q9HDC5                                                                                                                                                                                                                                                                                            | ; C109A_HUMAN                                                                                                                                                                                                                                                                                                                                                   |
| 280                        | IPI00170935                                                                                                                                                             | LRRC47                  | 583                                  | 583  | 583  | 6.3E+04                               | 6.3E+04 | 6.3E+04 | 13.9            | 6                     | 1         | 1         | 1        | 1         | ISOFORM 1 OF CHAPERONE-ACTIVITY OF BC1 COMPLEX-LIKE, MITOCHONDRIALPRECURSOR.; ISOFORM 3 OF CHAPERONE-ACTIVITY OF BC1 COMPLEX-LIKE, MITOCHONDRIALPRECURSOR.; CHAPERONE, ABC1 ACTIVITY OF BC1 COMPLEX HOMOLOG.; CHAPERONE, ABC1 ACTIVITY OF BC1 COMPLEX HOMOLOG.                                                                                                                                                                                                                                                                                                                                                                                                         | A1L377; Q5T7A2;<br>Q5T7A4; Q5T7A5;<br>Q63HK0; Q8NCJ6;<br>Q8N160; Q9HBO1;<br>Q9ND67<br>Q8913; Q5JY74;<br>Q86VZ3; Q9BR39;<br>Q9LJN4<br>O00535; Q6GMY1;<br>Q6NZ12; Q96H74;<br>Q9BT85; Q9HAP4                                                                                                                                                                                              | PURA1_HUMAN<br>LRC47_HUMAN                                                                                                                                                                                                                                                                                                                                      |
| 281                        | IPI00171199; IPI00419249                                                                                                                                                | PSMA3                   | 248                                  | 255  | 252  | 2.8E+04                               | 2.8E+04 | 2.8E+04 | 12.9            | 3                     | 0         | 0         | 1        | 0         | ISOFORM SERCA2A OF SARCOPLASMIC/ENDOPLASMIC RETICULUM CALCIUM ATPASE2.<br>ISOFORM 1 OF VERY-LONG-CHAIN SPECIFIC ACYL-COA DEHYDROGENASE, MITOCHONDRIAL PRECURSOR.; ISOFORM 2 OF VERY-LONG-CHAIN SPECIFIC ACYL-COA DEHYDROGENASE, MITOCHONDRIAL PRECURSOR.                                                                                                                                                                                                                                                                                                                                                                                                               | P16614; P16615                                                                                                                                                                                                                                                                                                                                                                         | AT2A2_HUMAN                                                                                                                                                                                                                                                                                                                                                     |
| 282                        | IPI00171573; IPI00185975                                                                                                                                                | CCDC109A                | 330                                  | 351  | 341  | 3.7E+04                               | 4.0E+04 | 3.8E+04 | 14.3            | 4                     | 0         | 0         | 1        | 1         | UBIQUITIN AND RIBOSOMAL PROTEIN S27A PRECURSOR.; CDNA FLJ46113 FIS, CLONE TESTI2036285, HIGHLY SIMILAR TO RATTUSNORVEGICUS UBIQUITIN C.; UBIQUITIN AND RIBOSOMAL PROTEIN L40 PRECURSOR.; UBIQUITIN B PRECURSOR.; 44 KDA PROTEIN.; 44 KDA PROTEIN.; 44 KDA PROTEIN.; UBIQUITIN.; UBIQUITIN C SPLICE VARIANT.; 30 KDA PROTEIN.; 16 KDA PROTEIN.; 25 KDA PROTEIN.; 39 KDA PROTEIN.                                                                                                                                                                                                                                                                                        | Q9UK99; Q9UMS6                                                                                                                                                                                                                                                                                                                                                                         | ; SYN2P_HUMAN                                                                                                                                                                                                                                                                                                                                                   |
| 283                        | IPI00171761; IPI00171769; IPI00552881                                                                                                                                   | FUNDC2                  | 189                                  | 218  | 199  | 2.1E+04                               | 2.3E+04 | 2.2E+04 | 12.7            | 4                     | 0         | 0         | 1        | 1         | ISOFORM 1 OF POLYMERASE I AND TRANSCRIPT RELEASE FACTOR.                                                                                                                                                                                                                                                                                                                                                                                                                                                                                                                                                                                                               | Q86VZ3; Q9BR39;<br>Q9LJN4<br>O00535; Q6GMY1;<br>Q6NZ12; Q96H74;<br>Q9BT85; Q9HAP4                                                                                                                                                                                                                                                                                                      | ; Q5HYE8_HUMAN; Q9BWH2_HUMAN<br>JPH1_HUMAN; Q4KMX3_HUMAN;<br>Q6AHW6_HUMAN; Q7Z682_HUMAN;<br>Q86VR1_HUMAN                                                                                                                                                                                                                                                        |
| 284                        | IPI00173461                                                                                                                                                             | JPH1                    | 661                                  | 661  | 661  | 7.2E+04                               | 7.2E+04 | 7.2E+04 | 6.4             | 3                     | 1         | 1         | 1        | 1         | ISOFORM 1 OF POLYMERASE I AND TRANSCRIPT RELEASE FACTOR.                                                                                                                                                                                                                                                                                                                                                                                                                                                                                                                                                                                                               | Q9UK99; Q9UMS6                                                                                                                                                                                                                                                                                                                                                                         | ; SYN2P_HUMAN                                                                                                                                                                                                                                                                                                                                                   |
| 285                        | IPI00173549; IPI00735855; IPI00737694; IPI00742098                                                                                                                      | SYNPO2                  | 1093                                 | 1261 | 1195 | 1.2E+05                               | 1.4E+05 | 1.3E+05 | 4.4             | 3                     | 1         | 1         | 1        | 1         | ISOFORM 1 OF POLYMERASE I AND TRANSCRIPT RELEASE FACTOR.                                                                                                                                                                                                                                                                                                                                                                                                                                                                                                                                                                                                               | Q9UK99; Q9UMS6                                                                                                                                                                                                                                                                                                                                                                         | ; SYN2P_HUMAN                                                                                                                                                                                                                                                                                                                                                   |
| 286                        | IPI00176469; IPI00641178; IPI00644715; IPI00645029                                                                                                                      | CABC1                   | 492                                  | 647  | 577  | 5.6E+04                               | 7.2E+04 | 6.5E+04 | 24.9            | 13                    | 1         | 1         | 1        | 1         | ISOFORM 1 OF JUNCTOPHILIN-2.                                                                                                                                                                                                                                                                                                                                                                                                                                                                                                                                                                                                                                           | A1L377; Q5T7A2;<br>Q5T7A4; Q5T7A5;<br>Q63HK0; Q8NCJ6;<br>Q8N160; Q9HBO1;<br>Q9ND67<br>Q8913; Q5JY74;<br>Q86VZ3; Q9BR39;<br>Q9LJN4<br>O00535; Q6GMY1;<br>Q6NZ12; Q96H74;<br>Q9BT85; Q9HAP4                                                                                                                                                                                              | A1L377_HUMAN; ADCK3_HUMAN;<br>Q5T7A2_HUMAN; Q5T7A4_HUMAN                                                                                                                                                                                                                                                                                                        |
| 287                        | IPI00176532                                                                                                                                                             | JPH2                    | 696                                  | 696  | 696  | 7.4E+04                               | 7.4E+04 | 7.4E+04 | 8.2             | 3                     | 1         | 1         | 1        | 1         | ISOFORM 1 OF POLYMERASE I AND TRANSCRIPT RELEASE FACTOR.                                                                                                                                                                                                                                                                                                                                                                                                                                                                                                                                                                                                               | Q86VZ3; Q9BR39;<br>Q9LJN4<br>O00535; Q6GMY1;<br>Q6NZ12; Q96H74;<br>Q9BT85; Q9HAP4                                                                                                                                                                                                                                                                                                      | JPH2_HUMAN; Q86VZ3_HUMAN                                                                                                                                                                                                                                                                                                                                        |
| 288                        | IPI00176903                                                                                                                                                             | PTRF                    | 390                                  | 390  | 390  | 4.3E+04                               | 4.3E+04 | 4.3E+04 | 28.2            | 10                    | 1         | 1         | 1        | 1         | ISOFORM SERCA2A OF SARCOPLASMIC/ENDOPLASMIC RETICULUM CALCIUM ATPASE2.<br>ISOFORM 1 OF VERY-LONG-CHAIN SPECIFIC ACYL-COA DEHYDROGENASE, MITOCHONDRIAL PRECURSOR.; ISOFORM 2 OF VERY-LONG-CHAIN SPECIFIC ACYL-COA DEHYDROGENASE, MITOCHONDRIAL PRECURSOR.                                                                                                                                                                                                                                                                                                                                                                                                               | P16614; P16615                                                                                                                                                                                                                                                                                                                                                                         | AT2A2_HUMAN                                                                                                                                                                                                                                                                                                                                                     |
| 289                        | IPI00177817                                                                                                                                                             | ATP2A2                  | 997                                  | 997  | 997  | 1.1E+05                               | 1.1E+05 | 1.1E+05 | 33.2            | 41                    | 1         | 1         | 1        | 1         | UBIQUITIN AND RIBOSOMAL PROTEIN S27A PRECURSOR.; CDNA FLJ46113 FIS, CLONE TESTI2036285, HIGHLY SIMILAR TO RATTUSNORVEGICUS UBIQUITIN C.; UBIQUITIN AND RIBOSOMAL PROTEIN L40 PRECURSOR.; UBIQUITIN B PRECURSOR.; 44 KDA PROTEIN.; 44 KDA PROTEIN.; 44 KDA PROTEIN.; UBIQUITIN.; UBIQUITIN C SPLICE VARIANT.; 30 KDA PROTEIN.; 16 KDA PROTEIN.; 25 KDA PROTEIN.; 39 KDA PROTEIN.                                                                                                                                                                                                                                                                                        | Q53HR2<br>P02248; P02249;<br>P02250; P62988;<br>Q29120; Q3MIH3;<br>Q5RKT7; Q5U5U6;<br>Q5UGI3; Q6LBL4;<br>Q6LDU5; Q6ZRT8;<br>Q91887; Q91888;<br>Q98W06; Q9B3X8;<br>Q9UEF2; Q9UEG1;<br>Q9UEK8; Q9UPK7<br>Q5VU71<br>P23109; Q5TF00;<br>Q5TF02; Q5W9V2;<br>Q6F4B5; Q6F4B6;<br>Q6F4B7; Q6F4B8;<br>Q6F4B9; Q6I6Y1;<br>Q6I6Y2; Q6I6Y3;<br>Q6PH79; Q6PJ57<br>P13639; Q58J86;<br>Q6PK56; Q8TA90 | ; Q53HR2_HUMAN                                                                                                                                                                                                                                                                                                                                                  |
| 290                        | IPI00028031; IPI00178744                                                                                                                                                | ACADVL                  | 679                                  | 701  | 690  | 7.3E+04                               | 7.5E+04 | 7.4E+04 | 42.2            | 30                    | 1         | 1         | 1        | 1         | ADENOSINE MONOPHOSPHATE DEAMINASE 1.; AMP DEAMINASE 1.; 90 KDA PROTEIN.                                                                                                                                                                                                                                                                                                                                                                                                                                                                                                                                                                                                | Q53HR2<br>P02248; P02249;<br>P02250; P62988;<br>Q29120; Q3MIH3;<br>Q5RKT7; Q5U5U6;<br>Q5UGI3; Q6LBL4;<br>Q6LDU5; Q6ZRT8;<br>Q91887; Q91888;<br>Q98W06; Q9B3X8;<br>Q9UEF2; Q9UEG1;<br>Q9UEK8; Q9UPK7<br>Q5VU71<br>P23109; Q5TF00;<br>Q5TF02; Q5W9V2;<br>Q6F4B5; Q6F4B6;<br>Q6F4B7; Q6F4B8;<br>Q6F4B9; Q6I6Y1;<br>Q6I6Y2; Q6I6Y3;<br>Q6PH79; Q6PJ57<br>P13639; Q58J86;<br>Q6PK56; Q8TA90 | ; Q53HR2_HUMAN                                                                                                                                                                                                                                                                                                                                                  |
| 291                        | IPI00179330; IPI00418813; IPI00456429; IPI00719280; IPI00743241; IPI00743650; IPI00744274; IPI00783060; IPI00784990; IPI00789107; IPI00789823; IPI00790633; IPI00792712 | RPS27A; UBA52; UBB; UBC | 76                                   | 388  | 239  | 8.6E+03                               | 4.4E+04 | 2.7E+04 | 34.0            | 6                     | 1         | 1         | 1        | 1         | ADENOSINE MONOPHOSPHATE DEAMINASE 1.; AMP DEAMINASE 1.; 90 KDA PROTEIN.                                                                                                                                                                                                                                                                                                                                                                                                                                                                                                                                                                                                | Q53HR2<br>P02248; P02249;<br>P02250; P62988;<br>Q29120; Q3MIH3;<br>Q5RKT7; Q5U5U6;<br>Q5UGI3; Q6LBL4;<br>Q6LDU5; Q6ZRT8;<br>Q91887; Q91888;<br>Q98W06; Q9B3X8;<br>Q9UEF2; Q9UEG1;<br>Q9UEK8; Q9UPK7<br>Q5VU71<br>P23109; Q5TF00;<br>Q5TF02; Q5W9V2;<br>Q6F4B5; Q6F4B6;<br>Q6F4B7; Q6F4B8;<br>Q6F4B9; Q6I6Y1;<br>Q6I6Y2; Q6I6Y3;<br>Q6PH79; Q6PJ57<br>P13639; Q58J86;<br>Q6PK56; Q8TA90 | ; Q3MIH3_HUMAN; Q5RKT7_HUMAN;<br>Q5U5U6_HUMAN; Q5UGI3_HUMAN;<br>Q6ZRT8_HUMAN; UBIQ_HUMAN<br>Q5VU71_HUMAN<br>; AMPD1_HUMAN; Q5TF02_HUMAN;<br>Q5W9V2_HUMAN; Q6F4B5_HUMAN;<br>Q6F4B6_HUMAN; Q6F4B7_HUMAN;<br>Q6F4B8_HUMAN; Q6F4B9_HUMAN;<br>Q6I6Y1_HUMAN; Q6I6Y2_HUMAN;<br>Q6I6Y3_HUMAN; Q6PH79_HUMAN;<br>Q6PJ57_HUMAN<br>EF2_HUMAN; Q6PK56_HUMAN;<br>Q8TA90_HUMAN |
| 292                        | IPI00183968                                                                                                                                                             | TPM3                    | 285                                  | 285  | 285  | 3.3E+04                               | 3.3E+04 | 3.3E+04 | 78.6            | 33                    | 1         | 1         | 1        | 1         | ELONGATION FACTOR 2.                                                                                                                                                                                                                                                                                                                                                                                                                                                                                                                                                                                                                                                   | Q53HR2<br>P02248; P02249;<br>P02250; P62988;<br>Q29120; Q3MIH3;<br>Q5RKT7; Q5U5U6;<br>Q5UGI3; Q6LBL4;<br>Q6LDU5; Q6ZRT8;<br>Q91887; Q91888;<br>Q98W06; Q9B3X8;<br>Q9UEF2; Q9UEG1;<br>Q9UEK8; Q9UPK7<br>Q5VU71<br>P23109; Q5TF00;<br>Q5TF02; Q5W9V2;<br>Q6F4B5; Q6F4B6;<br>Q6F4B7; Q6F4B8;<br>Q6F4B9; Q6I6Y1;<br>Q6I6Y2; Q6I6Y3;<br>Q6PH79; Q6PJ57<br>P13639; Q58J86;<br>Q6PK56; Q8TA90 | ; Q53HR2_HUMAN                                                                                                                                                                                                                                                                                                                                                  |
| 293                        | IPI00185631; IPI00448879; IPI00794112                                                                                                                                   | AMPD1                   | 747                                  | 780  | 768  | 8.6E+04                               | 9.0E+04 | 8.9E+04 | 33.9            | 25                    | 1         | 1         | 1        | 1         | ELONGATION FACTOR 2.                                                                                                                                                                                                                                                                                                                                                                                                                                                                                                                                                                                                                                                   | Q53HR2<br>P02248; P02249;<br>P02250; P62988;<br>Q29120; Q3MIH3;<br>Q5RKT7; Q5U5U6;<br>Q5UGI3; Q6LBL4;<br>Q6LDU5; Q6ZRT8;<br>Q91887; Q91888;<br>Q98W06; Q9B3X8;<br>Q9UEF2; Q9UEG1;<br>Q9UEK8; Q9UPK7<br>Q5VU71<br>P23109; Q5TF00;<br>Q5TF02; Q5W9V2;<br>Q6F4B5; Q6F4B6;<br>Q6F4B7; Q6F4B8;<br>Q6F4B9; Q6I6Y1;<br>Q6I6Y2; Q6I6Y3;<br>Q6PH79; Q6PJ57<br>P13639; Q58J86;<br>Q6PK56; Q8TA90 | ; Q53HR2_HUMAN                                                                                                                                                                                                                                                                                                                                                  |
| 294                        | IPI00186290                                                                                                                                                             | EEF2                    | 858                                  | 858  | 858  | 9.5E+04                               | 9.5E+04 | 9.5E+04 | 25.8            | 18                    | 1         | 1         | 1        | 1         | ISOFORM IIA OF MYC BOX-DEPENDENT-INTERACTING PROTEIN 1.; ISOFORM BIN1-13 OF MYC BOX-DEPENDENT-INTERACTING PROTEIN 1.; ISOFORM BIN1+12A OF MYC BOX-DEPENDENT-INTERACTING PROTEIN 1.; ISOFORM IIB OF MYC BOX-DEPENDENT-INTERACTING PROTEIN 1.; ISOFORM IIC1 OF MYC BOX-DEPENDENT-INTERACTING PROTEIN 1.; ISOFORM IIC2 OF MYC BOX-DEPENDENT-INTERACTING PROTEIN 1.; ISOFORM IIC3 OF MYC BOX-DEPENDENT-INTERACTING PROTEIN 1.; ISOFORM BIN1 OF MYC BOX-DEPENDENT-INTERACTING PROTEIN 1.; ISOFORM BIN1-10-13 OF MYC BOX-DEPENDENT-INTERACTING PROTEIN 1.; ISOFORM IIC2 OF MYC BOX-DEPENDENT-INTERACTING PROTEIN 1.; ISOFORM IID OF MYC BOX-DEPENDENT-INTERACTING PROTEIN 1. | Q53HR2<br>P02248; P02249;<br>P02250; P62988;<br>Q29120; Q3MIH3;<br>Q5RKT7; Q5U5U6;<br>Q5UGI3; Q6LBL4;<br>Q6LDU5; Q6ZRT8;<br>Q91887; Q91888;<br>Q98W06; Q9B3X8;<br>Q9UEF2; Q9UEG1;<br>Q9UEK8; Q9UPK7<br>Q5VU71<br>P23109; Q5TF00;<br>Q5TF02; Q5W9V2;<br>Q6F4B5; Q6F4B6;<br>Q6F4B7; Q6F4B8;<br>Q6F4B9; Q6I6Y1;<br>Q6I6Y2; Q6I6Y3;<br>Q6PH79; Q6PJ57<br>P13639; Q58J86;<br>Q6PK56; Q8TA90 | ; Q53HR2_HUMAN                                                                                                                                                                                                                                                                                                                                                  |
| 295                        | IPI00186966; IPI00220586; IPI00220587; IPI00220996; IPI00220997; IPI00220998; IPI00220999; IPI00221000; IPI00221001; IPI00329733; IPI00395680                           | BIN1                    | 409                                  | 593  | 486  | 4.6E+04                               | 6.5E+04 | 5.3E+04 | 38.8            | 15                    | 1         | 1         | 1        | 1         | ELONGATION FACTOR 2.                                                                                                                                                                                                                                                                                                                                                                                                                                                                                                                                                                                                                                                   | Q53HR2<br>P02248; P02249;<br>P02250; P62988;<br>Q29120; Q3MIH3;<br>Q5RKT7; Q5U5U6;<br>Q5UGI3; Q6LBL4;<br>Q6LDU5; Q6ZRT8;<br>Q91887; Q91888;<br>Q98W06; Q9B3X8;<br>Q9UEF2; Q9UEG1;<br>Q9UEK8; Q9UPK7<br>Q5VU71<br>P23109; Q5TF00;<br>Q5TF02; Q5W9V2;<br>Q6F4B5; Q6F4B6;<br>Q6F4B7; Q6F4B8;<br>Q6F4B9; Q6I6Y1;<br>Q6I6Y2; Q6I6Y3;<br>Q6PH79; Q6PJ57<br>P13639; Q58J86;<br>Q6PK56; Q8TA90 | ; BIN1_HUMAN; Q659B7_HUMAN;<br>Q8WWH9_HUMAN; Q9BTH3_HUMAN                                                                                                                                                                                                                                                                                                       |

| Protein Group | IPI ID                                                                                                 | IPI gene name               | Amino Acids in Sequence <sup>1</sup> |      |      | Protein Molecular Weight <sup>1</sup> |         |         | Seq. Cov. (max) | Unique Peptides (max) | Detection |           |          |           |   |   | Protein name                                                                                                                                                                                                                                                                                                                                                                                                                                                                                                   | UniProt Id                                                                             | UniProt Entry Name                                                                              |
|---------------|--------------------------------------------------------------------------------------------------------|-----------------------------|--------------------------------------|------|------|---------------------------------------|---------|---------|-----------------|-----------------------|-----------|-----------|----------|-----------|---|---|----------------------------------------------------------------------------------------------------------------------------------------------------------------------------------------------------------------------------------------------------------------------------------------------------------------------------------------------------------------------------------------------------------------------------------------------------------------------------------------------------------------|----------------------------------------------------------------------------------------|-------------------------------------------------------------------------------------------------|
|               |                                                                                                        |                             | Min.                                 | Max. | Mean | Min.                                  | Max.    | Mean    |                 |                       | Expt. I-1 | Expt. I-2 | Expt. II | Expt. III |   |   |                                                                                                                                                                                                                                                                                                                                                                                                                                                                                                                |                                                                                        |                                                                                                 |
| 296           | IPI00215715; IPI00745082                                                                               | CAMK2A                      | 478                                  | 478  | 478  | 5.4E+04                               | 5.4E+04 | 5.4E+04 | 13.0            | 4                     | 0         | 0         | 1        | 1         | 1 | 1 | ISOFORM A OF CALCIUM/CALMODULIN-DEPENDENT PROTEIN KINASE TYPE II ALPHACHAIN.; CALCIUM/CALMODULIN-DEPENDENT PROTEIN KINASE IIA ISOFORM 2.                                                                                                                                                                                                                                                                                                                                                                       | Q7LDD5; Q9UL21; Q6UJ0M; Q9Y2H4; Q9Y352                                                 | KCC2A_HUMAN; Q7LDD5_HUMAN; Q9Y2H4_HUMAN                                                         |
| 297           | IPI00215746                                                                                            | FABP4                       | 132                                  | 132  | 132  | 1.5E+04                               | 1.5E+04 | 1.5E+04 | 25.0            | 2                     | 0         | 0         | 1        | 1         | 1 | 1 | FATTY ACID-BINDING PROTEIN, ADIPOCYTE.                                                                                                                                                                                                                                                                                                                                                                                                                                                                         | P15090; Q6IBA1                                                                         | FABPA_HUMAN; Q6IBA1_HUMAN                                                                       |
| 298           | IPI00215780                                                                                            | RPS19                       | 145                                  | 145  | 145  | 1.6E+04                               | 1.6E+04 | 1.6E+04 | 13.8            | 2                     | 0         | 0         | 1        | 0         | 0 | 0 | 40S RIBOSOMAL PROTEIN S19.                                                                                                                                                                                                                                                                                                                                                                                                                                                                                     | P39019; Q8VWV7                                                                         | Q8VWV7_HUMAN; RS19_HUMAN                                                                        |
| 299           | IPI00215790                                                                                            | RPL38                       | 70                                   | 70   | 70   | 8.2E+03                               | 8.2E+03 | 8.2E+03 | 50.0            | 4                     | 0         | 0         | 1        | 1         | 1 | 1 | 60S RIBOSOMAL PROTEIN L38. ISOFORM 1 OF ADENYLATE KINASE ISOENZYME 2, MITOCHONDRIAL.; ISOFORM 2 OF ADENYLATE KINASE ISOENZYME 2, MITOCHONDRIAL.                                                                                                                                                                                                                                                                                                                                                                | P23411; P63173                                                                         | RL38_HUMAN                                                                                      |
| 300           | IPI00215901; IPI00218988                                                                               | AK2                         | 232                                  | 239  | 236  | 2.6E+04                               | 2.6E+04 | 2.6E+04 | 10.0            | 2                     | 0         | 0         | 1        | 0         | 0 | 0 | ADP-RIBOSYLATION FACTOR 1.; ADP-RIBOSYLATION FACTOR 3.; 14 KDA PROTEIN.                                                                                                                                                                                                                                                                                                                                                                                                                                        | P54819; Q16856; Q5T1F7; Q5T1F8; Q8TCY2; Q8TCY3                                         | KAD2_HUMAN; Q5T1F8_HUMAN                                                                        |
| 301           | IPI00215914; IPI00215917; IPI00797941                                                                  | ARF1; ARF3                  | 129                                  | 181  | 164  | 1.4E+04                               | 2.1E+04 | 1.9E+04 | 24.3            | 4                     | 0         | 0         | 1        | 1         | 1 | 1 | ADP-RIBOSYLATION FACTOR 6. CARBONIC ANHYDRASE 1.                                                                                                                                                                                                                                                                                                                                                                                                                                                               | P10947; P16587; P32889; P61204; P84077                                                 | ; ARF1_HUMAN; ARF3_HUMAN                                                                        |
| 302           | IPI00215920                                                                                            | ARF6                        | 175                                  | 175  | 175  | 2.0E+04                               | 2.0E+04 | 2.0E+04 | 12.6            | 2                     | 0         | 0         | 1        | 1         | 1 | 1 | ADP-RIBOSYLATION FACTOR 6.                                                                                                                                                                                                                                                                                                                                                                                                                                                                                     | Q5U025; Q6FG22; Q6FH17                                                                 | ARF6_HUMAN; Q5U025_HUMAN; Q6FG22_HUMAN; Q6FH17_HUMAN                                            |
| 303           | IPI00215983                                                                                            | CA1                         | 261                                  | 261  | 261  | 2.9E+04                               | 2.9E+04 | 2.9E+04 | 48.3            | 10                    | 1         | 1         | 1        | 1         | 1 | 1 | ISOFORM 1 OF VOLTAGE-DEPENDENT ANION-SELECTIVE CHANNEL PROTEIN 2.; ISOFORM 2 OF VOLTAGE-DEPENDENT ANION-SELECTIVE CHANNEL PROTEIN 2.; ISOFORM 3 OF VOLTAGE-DEPENDENT ANION-SELECTIVE CHANNEL PROTEIN 2.; ISOFORM 4 OF VOLTAGE-DEPENDENT ANION-SELECTIVE CHANNEL PROTEIN 2.; ISOFORM 5 OF VOLTAGE-DEPENDENT ANION-SELECTIVE CHANNEL PROTEIN 2.; SIMILAR TO VOLTAGE-DEPENDENT ANION CHANNEL 2.; ISOFORM 6 OF VOLTAGE-DEPENDENT ANION-SELECTIVE CHANNEL PROTEIN 2.; SIMILAR TO VOLTAGE-DEPENDENT ANION CHANNEL 2. | P00915                                                                                 | CAH1_HUMAN                                                                                      |
| 304           | IPI00024145; IPI00216024; IPI00216026; IPI00216027; IPI00411815; IPI00455531; IPI00718908; IPI00737171 | LOC647153; LOC729317; VDAC2 | 283                                  | 347  | 309  | 3.0E+04                               | 3.8E+04 | 3.3E+04 | 27.4            | 8                     | 1         | 1         | 1        | 1         | 1 | 1 | ISOFORM 1 OF HETEROGENEOUS NUCLEAR RIBONUCLEOPROTEIN K.; ISOFORM 2 OF HETEROGENEOUS NUCLEAR RIBONUCLEOPROTEIN K.; HETEROGENEOUS NUCLEAR RIBONUCLEOPROTEIN K.; ISOFORM 3 OF HETEROGENEOUS NUCLEAR RIBONUCLEOPROTEIN K.                                                                                                                                                                                                                                                                                          | A2A3S1; P45880; Q5VWK1; Q5VWK3; Q6IB40; Q7L3J5; Q9BWK8; Q9Y5I6                         | ; A2A3S1_HUMAN; VDAC2_HUMAN                                                                     |
| 305           | IPI00216049; IPI00216746; IPI00514561; IPI00647717; IPI00807545                                        | HNRPK                       | 379                                  | 464  | 435  | 4.2E+04                               | 5.1E+04 | 4.8E+04 | 25.2            | 7                     | 1         | 1         | 1        | 1         | 1 | 1 | RIBONUCLEOPROTEIN K.                                                                                                                                                                                                                                                                                                                                                                                                                                                                                           | P61978; Q07244; Q15671; Q59F98; Q5EC54; Q5T6W2                                         | HNRPK_HUMAN; Q5EC54_HUMAN; Q5T6W2_HUMAN; Q5T6W4_HUMAN; Q6I6N1_HUMAN; Q5T6W5_HUMAN; Q6I6N1_HUMAN |
| 306           | IPI00216070                                                                                            | MYL1                        | 194                                  | 194  | 194  | 2.1E+04                               | 2.1E+04 | 2.1E+04 | 76.8            | 23                    | 1         | 1         | 1        | 1         | 1 | 1 | MYOSIN LIGHT CHAIN 1, SKELETAL MUSCLE ISOFORM.                                                                                                                                                                                                                                                                                                                                                                                                                                                                 | P05976; Q53SD2; Q6IBD5                                                                 | MLE1_HUMAN; Q53SD2_HUMAN                                                                        |
| 307           | IPI00216138                                                                                            | TAGLN                       | 201                                  | 201  | 201  | 2.3E+04                               | 2.3E+04 | 2.3E+04 | 12.4            | 2                     | 0         | 0         | 1        | 1         | 1 | 1 | TRANSGLUTININ.                                                                                                                                                                                                                                                                                                                                                                                                                                                                                                 | Q15542; Q01995; Q53GC9; Q5U0D2; Q6FI52                                                 | Q53GC9_HUMAN; Q5U0D2_HUMAN; Q6FI52_HUMAN; TAGL_HUMAN                                            |
| 308           | IPI00216236; IPI00657955                                                                               | TNNI2                       | 182                                  | 182  | 182  | 2.1E+04                               | 2.1E+04 | 2.1E+04 | 24.2            | 6                     | 0         | 1         | 1        | 1         | 1 | 1 | TROPONIN I, FAST SKELETAL MUSCLE.; 21 KDA PROTEIN.                                                                                                                                                                                                                                                                                                                                                                                                                                                             | P48788; Q60744; P10599; Q5T936; Q5T937                                                 | ; TNNI2_HUMAN; Q60744_HUMAN; Q5T936_HUMAN; Q5T937_HUMAN; Q9UDG5_HUMAN;                          |
| 309           | IPI00216298; IPI00382841; IPI00552768                                                                  | TXN                         | 84                                   | 105  | 91   | 9.3E+03                               | 1.2E+04 | 1.0E+04 | 22.9            | 2                     | 0         | 0         | 1        | 1         | 1 | 1 | THIOREDOXIN; THIOREDOXIN DELTA 3 (FRAGMENT).; THIOREDOXIN.                                                                                                                                                                                                                                                                                                                                                                                                                                                     | Q96K13; Q9UDG5; P21796; Q5FVE7; Q9UIQ5; Q9UPL0                                         | THIO_HUMAN                                                                                      |
| 310           | IPI00216308                                                                                            | VDAC1                       | 283                                  | 283  | 283  | 3.1E+04                               | 3.1E+04 | 3.1E+04 | 60.8            | 15                    | 1         | 1         | 1        | 1         | 1 | 1 | VOLTAGE-DEPENDENT ANION-SELECTIVE CHANNEL PROTEIN 1.                                                                                                                                                                                                                                                                                                                                                                                                                                                           | Q9UIQ5; Q9UPL0                                                                         | VDAC1_HUMAN                                                                                     |
| 311           | IPI00216348; IPI00302712; IPI00744015; IPI00827813; IPI00827859                                        | DYNC1I2                     | 611                                  | 641  | 628  | 6.8E+04                               | 7.2E+04 | 7.0E+04 | 5.7             | 2                     | 0         | 0         | 1        | 0         | 0 | 0 | ISOFORM 2C OF CYTOPLASMIC DYNEIN 1 INTERMEDIATE CHAIN 2.; ISOFORM 2B OF CYTOPLASMIC DYNEIN 1 INTERMEDIATE CHAIN 2.; ISOFORM 2A OF CYTOPLASMIC DYNEIN 1 INTERMEDIATE CHAIN 2.; ISOFORM 2F OF CYTOPLASMIC DYNEIN 1 INTERMEDIATE CHAIN 2.; ISOFORM 2E OF CYTOPLASMIC DYNEIN 1 INTERMEDIATE CHAIN 2.                                                                                                                                                                                                               | Q13409; Q32LY9; Q53S84; Q59GJ5; Q5BJF8; Q7Z4X1; Q96NG7; Q96S87; Q98XZ5; Q9NT58         | DC12_HUMAN; Q32LY9_HUMAN; Q53S84_HUMAN; Q59GJ5_HUMAN; Q5BJF8_HUMAN; Q7Z4X1_HUMAN                |
| 312           | IPI00216461; IPI00784259                                                                               | ACYP2                       | 99                                   | 127  | 113  | 1.1E+04                               | 1.4E+04 | 1.3E+04 | 45.5            | 6                     | 0         | 0         | 1        | 1         | 1 | 1 | ACYLPHOSPHATASE 2.; ACYLPHOSPHATASE, MUSCLE TYPE ISOZYME.                                                                                                                                                                                                                                                                                                                                                                                                                                                      | P14621; Q4ZFV7; Q53TK7                                                                 | ; ACYP2_HUMAN; Q4ZFV7_HUMAN; Q53TK7_HUMAN                                                       |
| 313           | IPI00216798                                                                                            | MYL2                        | 166                                  | 166  | 166  | 1.9E+04                               | 1.9E+04 | 1.9E+04 | 84.9            | 20                    | 1         | 1         | 1        | 1         | 1 | 1 | MYOSIN REGULATORY LIGHT CHAIN 2,                                                                                                                                                                                                                                                                                                                                                                                                                                                                               | P10916; Q14908; Q16123; Q6IB42; Q7Z321                                                 | MLRV_HUMAN; Q14908_HUMAN; Q6IB42_HUMAN; Q7Z321_HUMAN                                            |
| 314           | IPI00216983                                                                                            | CA3                         | 260                                  | 260  | 260  | 3.0E+04                               | 3.0E+04 | 3.0E+04 | 66.5            | 16                    | 1         | 1         | 1        | 1         | 1 | 1 | VENTRICULAR/CARDIAC MUSCLE ISOFORM. CARBONIC ANHYDRASE 3.                                                                                                                                                                                                                                                                                                                                                                                                                                                      | Q6B942; P07451; P12631; P12750; P27576; P55831; P62701; Q14727; Q53HV1; Q6IPY4; Q96IR1 | CAH3_HUMAN                                                                                      |
| 315           | IPI00217030                                                                                            | RPS4X                       | 263                                  | 263  | 263  | 3.0E+04                               | 3.0E+04 | 3.0E+04 | 8.4             | 2                     | 0         | 0         | 1        | 0         | 0 | 0 | 40S RIBOSOMAL PROTEIN S4, X ISOFORM.                                                                                                                                                                                                                                                                                                                                                                                                                                                                           | Q53HV1; Q6IPY4; Q96IR1                                                                 | Q53HV1_HUMAN; Q96IR1_HUMAN; RS4X_HUMAN                                                          |
| 316           | IPI00217232; IPI00464979                                                                               | SUCLA2                      | 441                                  | 463  | 452  | 4.8E+04                               | 5.0E+04 | 4.9E+04 | 34.0            | 10                    | 1         | 1         | 1        | 1         | 1 | 1 | ISOFORM 2 OF SUCCINYL-COA LIGASE [ADP-FORMING] BETA-CHAIN, MITOCHONDRIAL PRECURSOR.; ISOFORM 1 OF SUCCINYL-COA LIGASE [ADP-FORMING] BETA-CHAIN, MITOCHONDRIAL PRECURSOR.                                                                                                                                                                                                                                                                                                                                       | Q95194; Q5T9Q4; Q5T9Q6; Q6NOB1; Q7Z503; Q9NVZ1; Q9NVV7; Q9PZK7                         | Q5T9Q4_HUMAN; Q5T9Q6_HUMAN; Q6NOB1_HUMAN; Q7Z503_HUMAN; SUCB1_HUMAN                             |
| 317           | IPI00217428; IPI00644184; IPI00651724                                                                  | UNC45B                      | 850                                  | 931  | 903  | 9.5E+04                               | 1.0E+05 | 1.0E+05 | 13.5            | 12                    | 1         | 1         | 1        | 1         | 1 | 1 | ISOFORM 1 OF UNC45 HOMOLOG B.; ISOFORM 2 OF UNC45 HOMOLOG B.; ISOFORM 3 OF UNC45 HOMOLOG B.                                                                                                                                                                                                                                                                                                                                                                                                                    | Q495Q8; Q495Q9; Q8IWX7; P24298; P78398; Q93076                                         | UN45B_HUMAN                                                                                     |
| 318           | IPI00217458                                                                                            | GPT                         | 496                                  | 496  | 496  | 5.5E+04                               | 5.5E+04 | 5.5E+04 | 27.2            | 9                     | 1         | 1         | 1        | 1         | 1 | 1 | ALANINE AMINOTRANSFERASE 1.                                                                                                                                                                                                                                                                                                                                                                                                                                                                                    | P16402; Q2M2I2; P02144; Q52H51;                                                        | ALAT1_HUMAN                                                                                     |
| 319           | IPI00217466                                                                                            | HIST1H1D                    | 221                                  | 221  | 221  | 2.2E+04                               | 2.2E+04 | 2.2E+04 | 21.3            | 5                     | 0         | 0         | 1        | 1         | 1 | 1 | HISTONE H1.3.                                                                                                                                                                                                                                                                                                                                                                                                                                                                                                  | Q5THY7; Q8VWH6                                                                         | H13_HUMAN                                                                                       |
| 320           | IPI00217493                                                                                            | MB                          | 154                                  | 154  | 154  | 1.7E+04                               | 1.7E+04 | 1.7E+04 | 74.0            | 24                    | 1         | 1         | 1        | 1         | 1 | 1 | MYOGLOBIN.                                                                                                                                                                                                                                                                                                                                                                                                                                                                                                     | Q5THY7; Q8VWH6                                                                         | MYG_HUMAN; Q8VWH6_HUMAN                                                                         |

| Protein Group <sup>a</sup> | IPI ID                                                          | IPI gene name  | Amino Acids in Sequence <sup>b</sup> |      |      | Protein Molecular Weight <sup>c</sup> |         |         | Seq. Cov. (max) | Unique Peptides (max) | Detection |           |          |           | Protein name                                                                                                                                                                                                                                                                      | Uniprot Id                                                                     | Uniprot Entry Name                                   |
|----------------------------|-----------------------------------------------------------------|----------------|--------------------------------------|------|------|---------------------------------------|---------|---------|-----------------|-----------------------|-----------|-----------|----------|-----------|-----------------------------------------------------------------------------------------------------------------------------------------------------------------------------------------------------------------------------------------------------------------------------------|--------------------------------------------------------------------------------|------------------------------------------------------|
|                            |                                                                 |                | Min.                                 | Max. | Mean | Min.                                  | Max.    | Mean    |                 |                       | Expt. I-1 | Expt. I-2 | Expt. II | Expt. III |                                                                                                                                                                                                                                                                                   |                                                                                |                                                      |
| 321                        | IPI00217871                                                     | ALDH4A1        | 563                                  | 563  | 563  | 6.2E+04                               | 6.2E+04 | 6.2E+04 | 28.6            | 11                    | 1         | 1         | 1        | 1         | DELTA-1-PYRROLINE-5-CARBOXYLATE DEHYDROGENASE, MITOCHONDRIALPRECURSOR.                                                                                                                                                                                                            | P30038; Q16882; Q53HJ4; Q5JNV6; Q81Z38; Q96IF0                                 | AL4A1_HUMAN; Q53HJ4_HUMAN; Q5JNV6_HUMAN              |
| 322                        | IPI00217966                                                     | LDHA           | 332                                  | 332  | 332  | 3.7E+04                               | 3.7E+04 | 3.7E+04 | 52.4            | 20                    | 1         | 1         | 1        | 1         | ISOFORM 1 OF L-LACTATE DEHYDROGENASE A CHAIN.                                                                                                                                                                                                                                     | P00338; Q53G53; Q618M7; Q6ZNV1                                                 | LDHA_HUMAN                                           |
| 323                        | IPI00217976; IPI00747283                                        | MAPT           | 758                                  | 776  | 767  | 7.9E+04                               | 8.1E+04 | 8.0E+04 | 13.2            | 6                     | 1         | 1         | 1        | 0         | MICROTUBULE-ASSOCIATED PROTEIN TAU.; ISOFORM PNS-TAU OF MICROTUBULE-ASSOCIATED PROTEIN TAU.                                                                                                                                                                                       | P10636; P18518; Q14799; Q15549; Q15550; Q15551; Q5CZ17; Q9UDJ3; Q9UMH0; Q9UQ96 | Q5CZ17_HUMAN; TAU_HUMAN                              |
| 324                        | IPI00218130                                                     | PYGM           | 842                                  | 842  | 842  | 9.7E+04                               | 9.7E+04 | 9.7E+04 | 62.5            | 73                    | 1         | 1         | 1        | 1         | GLYCOGEN PHOSPHORYLASE, MUSCLE FORM.                                                                                                                                                                                                                                              | A0AVK1; P11217                                                                 | PYGM_HUMAN                                           |
| 325                        | IPI00218192; IPI00294193; IPI00556036; IPI00760855; IPI00790993 | ITIH4; TMEM110 | 699                                  | 940  | 879  | 7.7E+04                               | 1.0E+05 | 9.7E+04 | 6.6             | 5                     | 1         | 1         | 1        | 1         | ISOFORM 2 OF INTER-ALPHA-TRYPSIN INHIBITOR HEAVY CHAIN H4 PRECURSOR.; ISOFORM 1 OF INTER-ALPHA-TRYPSIN INHIBITOR HEAVY CHAIN H4 PRECURSOR.; INTER-ALPHA (GLOBULIN) INHIBITOR H4 (PLASMA KALLIKREIN-SENSITIVEGLYCOPROTEIN) VARIANT (FRAGMENT).; 101 KDA PROTEIN.; 104 KDA PROTEIN. | Q14624; Q15135; Q59F51; Q68DH2; Q9P190; Q9U054                                 | ITIH4_HUMAN; Q59F51_HUMAN; Q68DH2_HUMAN              |
| 326                        | IPI00218236                                                     | PPP1CB         | 327                                  | 327  | 327  | 3.7E+04                               | 3.7E+04 | 3.7E+04 | 16.8            | 4                     | 1         | 1         | 1        | 1         | SERINE/THREONINE-PROTEIN PHOSPHATASE PP1-BETA CATALYTIC SUBUNIT.                                                                                                                                                                                                                  | P37140; P62140; Q5U087; Q6FG45                                                 | PP1B_HUMAN                                           |
| 327                        | IPI00218342; IPI00794900                                        | MTHFD1         | 935                                  | 974  | 955  | 1.0E+05                               | 1.1E+05 | 1.0E+05 | 17.7            | 15                    | 1         | 1         | 1        | 1         | C-1-TETRAHYDROFOLATE SYNTHASE, CYTOPLASMIC.; 105 KDA PROTEIN.                                                                                                                                                                                                                     | P11586; Q86VC9; Q9BVP5                                                         | C1TC_HUMAN                                           |
| 328                        | IPI00218343; IPI00387144; IPI00792677                           | TUBA1B; TUBA1C | 416                                  | 451  | 439  | 4.6E+04                               | 5.0E+04 | 4.9E+04 | 23.8            | 8                     | 0         | 0         | 1        | 1         | TUBULIN ALPHA-6 CHAIN.; TUBULIN ALPHA-UBIQUITOUS CHAIN.; 46 KDA PROTEIN.                                                                                                                                                                                                          | P68363; Q27168; Q53G47; Q9BOE3                                                 | Q27168_HUMAN; Q53G47_HUMAN; TBA6_HUMAN; TBAK_HUMAN   |
| 329                        | IPI00218414                                                     | CA2            | 260                                  | 260  | 260  | 2.9E+04                               | 2.9E+04 | 2.9E+04 | 36.5            | 9                     | 1         | 1         | 1        | 1         | CARBONIC ANHYDRASE 2.                                                                                                                                                                                                                                                             | P00918; Q6F112; Q6LD99; Q96ET9                                                 | CAH2_HUMAN; Q6LD99_HUMAN                             |
| 330                        | IPI00218474                                                     | ENO3           | 434                                  | 434  | 434  | 4.7E+04                               | 4.7E+04 | 4.7E+04 | 60.8            | 39                    | 1         | 1         | 1        | 1         | BETA-ENOLASE.                                                                                                                                                                                                                                                                     | P13929; Q96AE2; Q9NPL4                                                         | ENOB_HUMAN; Q9NPL4_HUMAN                             |
| 331                        | IPI00218568                                                     | PCBD1          | 104                                  | 104  | 104  | 1.2E+04                               | 1.2E+04 | 1.2E+04 | 17.3            | 2                     | 0         | 0         | 1        | 0         | PTERIN-4-ALPHA-CARBINOLAMINE DEHYDRATASE.                                                                                                                                                                                                                                         | P04687; P05209; P80095; Q6FGB3; Q6LEE0; Q6LEE1;                                | PHS_HUMAN; Q6FGB3_HUMAN; Q6LEE0_HUMAN; Q6LEE1_HUMAN; |
| 332                        | IPI00218570                                                     | PGAM2          | 253                                  | 253  | 253  | 2.9E+04                               | 2.9E+04 | 2.9E+04 | 48.2            | 14                    | 1         | 1         | 1        | 1         | PHOSPHOGLYCERATE MUTASE 2. ISOFORM 1 OF PHOSPHORYLASE B KINASE REGULATORY SUBUNIT BETA.; ISOFORM 2 OF PHOSPHORYLASE B KINASE REGULATORY SUBUNIT BETA.                                                                                                                             | Q6LEE2; Q9D930                                                                 | PGAM2_HUMAN                                          |
| 333                        | IPI00218571; IPI00514085                                        | PHKB           | 1086                                 | 1093 | 1090 | 1.2E+05                               | 1.2E+05 | 1.2E+05 | 11.6            | 11                    | 1         | 1         | 1        | 1         | BETA.                                                                                                                                                                                                                                                                             | P15259                                                                         | KBPB_HUMAN                                           |
| 334                        | IPI00218733; IPI00783680                                        | SOD1           | 154                                  | 156  | 155  | 1.6E+04                               | 1.6E+04 | 1.6E+04 | 16.7            | 2                     | 0         | 0         | 1        | 1         | 16 KDA PROTEIN.; SUPEROXIDE DISMUTASE. ISOFORM 2 OF LOW MOLECULAR WEIGHT PHOSPHOTYROSINE PROTEIN PHOSPHATASE.; ISOFORM 1 OF LOW MOLECULAR WEIGHT PHOSPHOTYROSINE PROTEIN PHOSPHATASE.; ISOFORM 3 OF LOW MOLECULAR WEIGHT PHOSPHOTYROSINE PROTEIN PHOSPHATASE.                     | Q8N4T5; Q93100                                                                 | Q6NR85_HUMAN; SODC_HUMAN                             |
| 335                        | IPI00218847; IPI00219861; IPI00410615                           | ACP1           | 124                                  | 158  | 147  | 1.4E+04                               | 1.8E+04 | 1.7E+04 | 31.7            | 4                     | 0         | 0         | 1        | 1         | ATP SYNTHASE, H+ TRANSPORTING, MITOCHONDRIAL FO COMPLEX, SUBUNIT E.                                                                                                                                                                                                               | P24666; P24667; Q16035; Q16036; Q16725; Q3KQX8;                                | PPAC_HUMAN; Q3KQX8_HUMAN; Q53RU0_HUMAN; Q59EH3_HUMAN |
| 336                        | IPI00218848                                                     | ATP5I          | 72                                   | 72   | 72   | 8.3E+03                               | 8.3E+03 | 8.3E+03 | 50.0            | 3                     | 0         | 0         | 1        | 1         | FO COMPLEX, SUBUNIT E.                                                                                                                                                                                                                                                            | Q53RU0; Q59EH3                                                                 |                                                      |
| 337                        | IPI00218914                                                     | ALDH1A1        | 501                                  | 501  | 501  | 5.5E+04                               | 5.5E+04 | 5.5E+04 | 39.9            | 14                    | 1         | 1         | 1        | 1         | RETINAL DEHYDROGENASE 1. GLYCERALDEHYDE-3-PHOSPHATE DEHYDROGENASE.; GLYCERALDEHYDE-3-PHOSPHATE DEHYDROGENASE.; 32 KDA PROTEIN.                                                                                                                                                    | Q00768; P00352; Q5SYR1                                                         | AL1A1_HUMAN; Q5SYR1_HUMAN                            |
| 338                        | IPI00219018; IPI00789134; IPI00795257                           | GAPDH          | 260                                  | 335  | 296  | 2.8E+04                               | 3.6E+04 | 3.2E+04 | 69.0            | 32                    | 1         | 1         | 1        | 1         | GLYCERALDEHYDE-3-PHOSPHATE DEHYDROGENASE.; 32 KDA PROTEIN.                                                                                                                                                                                                                        | P00354; P04406; Q16768; Q2TSD0; Q53X65; Q5ZEY3                                 | Q2TSD0_HUMAN; Q53X65_HUMAN; Q5ZEY3_HUMAN             |
| 339                        | IPI00219025                                                     | GLRX           | 106                                  | 106  | 106  | 1.2E+04                               | 1.2E+04 | 1.2E+04 | 11.3            | 2                     | 0         | 0         | 1        | 0         | GLUTAREDOXIN-1.                                                                                                                                                                                                                                                                   | P35754; Q3KQ51; Q6ICT1                                                         | GLRX1_HUMAN                                          |
| 340                        | IPI00219029                                                     | GOT1           | 413                                  | 413  | 413  | 4.6E+04                               | 4.6E+04 | 4.6E+04 | 62.5            | 24                    | 1         | 1         | 1        | 1         | ASPARTATE AMINOTRANSFERASE, CYTOPLASMIC. NADH DEHYDROGENASE [UBIQUINONE] 1 ALPHA SUBCOMPLEX SUBUNIT 8.                                                                                                                                                                            | P17174; Q2TU84; Q5VW80                                                         | AATC_HUMAN; Q2TU84_HUMAN                             |
| 341                        | IPI00219034                                                     | NDUFA8         | 172                                  | 172  | 172  | 2.0E+04                               | 2.0E+04 | 2.0E+04 | 30.2            | 3                     | 0         | 0         | 1        | 1         | GLUTATHIONE S-TRANSFERASE MU 2.; 26 KDA PROTEIN.; GLUTATHIONE TRANSFERASE.; 28 KDA PROTEIN.                                                                                                                                                                                       | P51970; Q5V250; Q9Y6N0                                                         | NDUA8_HUMAN; Q5V250_HUMAN                            |
| 342                        | IPI00645711                                                     | GSTM2          | 193                                  | 237  | 217  | 2.3E+04                               | 2.8E+04 | 2.6E+04 | 32.6            | 7                     | 1         | 0         | 1        | 1         | ISOFORM 1 OF LEUKOTRIENE A-4 HYDROLASE.                                                                                                                                                                                                                                           | P28161; Q0D218; Q2M318; Q5TZY5; Q8WWE1; Q9UE37                                 | Q2M318_HUMAN; Q0D218_HUMAN; Q9UE37_HUMAN             |
| 343                        | IPI00219077                                                     | LTA4H          | 611                                  | 611  | 611  | 6.9E+04                               | 6.9E+04 | 6.9E+04 | 22.6            | 9                     | 1         | 1         | 1        | 1         | ISOFORM 1 OF LEUKOTRIENE A-4 HYDROLASE.                                                                                                                                                                                                                                           | P09960; Q6IAT6                                                                 | LKHA4_HUMAN; Q6IAT6_HUMAN                            |
| 344                        | IPI00031801; IPI00219147; IPI00219148; IPI00555698              | CSDA           | 134                                  | 372  | 288  | 1.5E+04                               | 4.0E+04 | 3.1E+04 | 34.6            | 5                     | 1         | 1         | 1        | 1         | ISOFORM 1 OF DNA-BINDING PROTEIN A.; ISOFORM 2 OF DNA-BINDING PROTEIN A.; ISOFORM 3 OF DNA-BINDING PROTEIN A.; CSDA PROTEIN VARIANT (FRAGMENT).                                                                                                                                   | P16989; Q14121; Q59E85; Q96N96; Q96B76; Q96G07                                 | DBPA_HUMAN; Q59E85_HUMAN; Q96B76_HUMAN; Q96G07_HUMAN |
| 345                        | IPI00219207                                                     | RTN4           | 199                                  | 199  | 199  | 2.2E+04                               | 2.2E+04 | 2.2E+04 | 23.1            | 4                     | 1         | 1         | 1        | 1         | ISOFORM 3 OF RETICULON-4.                                                                                                                                                                                                                                                         | Q7L7Q5; Q9BXG5; Q9H212; Q9H3I3; Q8NOC3; Q9JUQ42;                               | Q53SY1_HUMAN; Q7L7Q5_HUMAN; RTN4_HUMAN               |
| 346                        | IPI00219217                                                     | LDHB           | 334                                  | 334  | 334  | 3.7E+04                               | 3.7E+04 | 3.7E+04 | 32.9            | 12                    | 1         | 1         | 1        | 1         | L-LACTATE DEHYDROGENASE B CHAIN.                                                                                                                                                                                                                                                  | Q8Y5U6                                                                         | LDHB_HUMAN; Q5U077_HUMAN                             |
| 347                        | IPI00219219                                                     | LGALS1         | 135                                  | 135  | 135  | 1.5E+04                               | 1.5E+04 | 1.5E+04 | 25.2            | 3                     | 1         | 0         | 1        | 1         | GALECTIN-1.                                                                                                                                                                                                                                                                       | P09382; Q15954                                                                 | LEG1_HUMAN; Q15954_HUMAN                             |
| 348                        | IPI00219226; IPI00796706                                        | HRC            | 699                                  | 706  | 703  | 8.0E+04                               | 8.1E+04 | 8.1E+04 | 12.0            | 4                     | 1         | 1         | 1        | 1         | SARCOPLASMIC RETICULUM HISTIDINE-RICH CALCIUM-BINDING PROTEINPRECURSOR.; 81 KDA PROTEIN. NADH DEHYDROGENASE [UBIQUINONE] 1 ALPHA SUBCOMPLEX SUBUNIT 2.                                                                                                                            | P23327; Q2M110; Q504Y6                                                         | Q2M110_HUMAN; SRCH_HUMAN                             |
| 349                        | IPI00219381                                                     | NDUFA2         | 99                                   | 99   | 99   | 1.1E+04                               | 1.1E+04 | 1.1E+04 | 20.2            | 3                     | 0         | 0         | 1        | 0         | ASPARTATE AMINOTRANSFERASE, CYTOPLASMIC. NADH DEHYDROGENASE [UBIQUINONE] 1 ALPHA SUBCOMPLEX SUBUNIT 8.                                                                                                                                                                            | O43678; Q6IAY8                                                                 | NDUA2_HUMAN                                          |

| Protein Group | IPI ID                                                          | IPI gene name    | Amino Acids in Sequence <sup>1</sup> |      |      | Protein Molecular Weight <sup>1</sup> |         |         | Seq. Cov. (max) | Unique Peptides (max) | Detection |           |          |           | Protein name                                                                                                                                   | Uniprot Id                                                                     | Uniprot Entry Name                                                                                                                       |
|---------------|-----------------------------------------------------------------|------------------|--------------------------------------|------|------|---------------------------------------|---------|---------|-----------------|-----------------------|-----------|-----------|----------|-----------|------------------------------------------------------------------------------------------------------------------------------------------------|--------------------------------------------------------------------------------|------------------------------------------------------------------------------------------------------------------------------------------|
|               |                                                                 |                  | Min.                                 | Max. | Mean | Min.                                  | Max.    | Mean    |                 |                       | Expt. I-1 | Expt. I-2 | Expt. II | Expt. III |                                                                                                                                                |                                                                                |                                                                                                                                          |
| 350           | IPI00219383                                                     | NDUFB3           | 98                                   | 98   | 98   | 1.1E+04                               | 1.1E+04 | 1.1E+04 | 21.4            | 2                     | 1         | 0         | 1        | 0         | NADH DEHYDROGENASE [UBIQUINONE] 1 BETA SUBCOMPLEX SUBUNIT 3.                                                                                   | O43676; Q6IB80                                                                 | NDUB3_HUMAN; Q6IB80_HUMAN                                                                                                                |
| 351           | IPI00219446; IPI00795288                                        | PEBP1            | 187                                  | 196  | 192  | 2.1E+04                               | 2.2E+04 | 2.1E+04 | 44.9            | 7                     | 1         | 1         | 1        | 1         | PHOSPHATIDYLETHANOLAMINE-BINDING PROTEIN 1.; 22 KDA PROTEIN.                                                                                   | P30086                                                                         | ; PEBP1_HUMAN                                                                                                                            |
| 352           | IPI00219525; IPI00747533                                        | PGD              | 483                                  | 485  | 484  | 5.3E+04                               | 5.3E+04 | 5.3E+04 | 19.5            | 6                     | 1         | 1         | 1        | 0         | 6-PHOSPHOGLUCONATE DEHYDROGENASE, DECARBOXYLATING.; 53 KDA PROTEIN.                                                                            | P52209; O4VXH6; Q9BWD8                                                         | ; 6PGD_HUMAN; O4VXH6_HUMAN                                                                                                               |
| 353           | IPI00219526                                                     | PGM1             | 562                                  | 562  | 562  | 6.1E+04                               | 6.1E+04 | 6.1E+04 | 65.1            | 37                    | 1         | 1         | 1        | 1         | ISOFORM 1 OF PHOSPHOGLUCOMUTASE-1. RIBOSE-PHOSPHATE PYROPHOSPHOKINASE III.; RIBOSE-PHOSPHATE PYROPHOSPHOKINASE I.                              | P09329; P21108; P60891; Q15244;                                                | PRPS1_HUMAN; PRPS3_HUMAN; Q15244_HUMAN; Q53FW2_HUMAN; Q5JPM8_HUMAN; Q5JV75_HUMAN; Q6P5P6_HUMAN                                           |
| 354           | IPI00218371; IPI00219616; IPI00643000; IPI00816572              | PRPS1; PRPS1L1   | 168                                  | 318  | 281  | 1.8E+04                               | 3.5E+04 | 3.1E+04 | 9.4             | 2                     | 0         | 0         | 1        | 1         | PHOSPHORIBOSYL PYROPHOSPHATE SYNTHETASE 1.; PHOSPHORIBOSYL PYROPHOSPHATE SYNTHETASE 1 VARIANT (FRAGMENT).                                      | Q53FW2; Q5JPM8; Q5JV75; Q6P5P6                                                 |                                                                                                                                          |
| 355           | IPI00219684                                                     | FABP3            | 133                                  | 133  | 133  | 1.5E+04                               | 1.5E+04 | 1.5E+04 | 58.7            | 9                     | 1         | 1         | 1        | 1         | FATTY ACID-BINDING PROTEIN, HEART.                                                                                                             | P05413; Q5VV93;                                                                | FABPH_HUMAN; Q6IBD7_HUMAN                                                                                                                |
| 356           | IPI00219685                                                     | NDUFA13          | 227                                  | 227  | 227  | 2.6E+04                               | 2.6E+04 | 2.6E+04 | 22.0            | 4                     | 1         | 0         | 1        | 1         | CELL DEATH-REGULATORY PROTEIN GRIM19.                                                                                                          | Q6IBD7; Q99957                                                                 |                                                                                                                                          |
| 357           | IPI00219729                                                     | SLC25A11         | 314                                  | 314  | 314  | 3.4E+04                               | 3.4E+04 | 3.4E+04 | 25.5            | 7                     | 1         | 1         | 1        | 1         | MITOCHONDRIAL 2-OXOGLUTARATE/MALATE CARRIER PROTEIN.                                                                                           | O75537; Q02978; Q6IBH0; Q969P7                                                 | M2OM_HUMAN; Q6IBH0_HUMAN                                                                                                                 |
| 358           | IPI00219757; IPI00796076; IPI00797321                           | GSTP1            | 191                                  | 210  | 203  | 2.1E+04                               | 2.3E+04 | 2.3E+04 | 40.0            | 5                     | 1         | 1         | 1        | 1         | GLUTATHIONE S-TRANSFERASE P.; 23 KDA PROTEIN.; 21 KDA PROTEIN.                                                                                 | O00460; P09211; Q15690; Q57Z73                                                 | ; GSTP1_HUMAN                                                                                                                            |
| 359           | IPI00219796                                                     | TNNC2            | 160                                  | 160  | 160  | 1.8E+04                               | 1.8E+04 | 1.8E+04 | 53.1            | 10                    | 1         | 1         | 1        | 1         | TROPONIN C, SKELETAL MUSCLE.                                                                                                                   | P02585; Q6FH92                                                                 | Q6FH92_HUMAN; TNNC2_HUMAN                                                                                                                |
| 360           | IPI00219910; IPI00783862                                        | BLVRB            | 206                                  | 211  | 209  | 2.2E+04                               | 2.3E+04 | 2.2E+04 | 31.8            | 6                     | 1         | 1         | 1        | 1         | 23 KDA PROTEIN.; FLAVIN REDUCTASE.                                                                                                             | P53005; Q32L22                                                                 | ; BLVRB_HUMAN                                                                                                                            |
| 361           | IPI00219913; IPI00640357                                        | USP14            | 459                                  | 494  | 477  | 5.2E+04                               | 5.6E+04 | 5.4E+04 | 25.3            | 9                     | 1         | 1         | 1        | 1         | UBIQUITIN CARBOXYL-TERMINAL HYDROLASE 14.; UBIQUITIN SPECIFIC PROTEASE 14 ISOFORM B.                                                           | P54578; Q53XY5                                                                 | ; Q53XY5_HUMAN; UBP14_HUMAN                                                                                                              |
| 362           | IPI00219953; IPI00514049; IPI00514929                           | CMPK             | 168                                  | 228  | 188  | 1.9E+04                               | 2.6E+04 | 2.1E+04 | 18.0            | 3                     | 0         | 0         | 1        | 1         | CYTIDYLATE KINASE; CYTIDYLATE KINASE.; CYTIDYLATE KINASE.                                                                                      | Q5SVZ1; Q5SVZ2                                                                 | ; Q5SVZ1_HUMAN; Q5SVZ2_HUMAN                                                                                                             |
| 363           | IPI00219983; IPI00796892                                        | CACNB1           | 523                                  | 643  | 583  | 5.8E+04                               | 7.1E+04 | 6.4E+04 | 23.3            | 9                     | 1         | 1         | 1        | 1         | ISOFORM 2 OF VOLTAGE-DEPENDENT L-TYPE CALCIUM CHANNEL SUBUNIT BETA-1.; 71 KDA PROTEIN.                                                         | Q02640; Q02641; Q9C085                                                         | ; CACB1_HUMAN                                                                                                                            |
| 364           | IPI00220063                                                     | NDUFS5           | 106                                  | 106  | 106  | 1.3E+04                               | 1.3E+04 | 1.3E+04 | 24.5            | 3                     | 1         | 0         | 1        | 1         | NADH DEHYDROGENASE [UBIQUINONE] IRON-SULFUR PROTEIN 5.                                                                                         | O43920; Q6IBA0                                                                 | NDU55_HUMAN; Q6IBA0_HUMAN                                                                                                                |
| 365           | IPI00220301                                                     | PRDX6            | 224                                  | 224  | 224  | 2.5E+04                               | 2.5E+04 | 2.5E+04 | 54.5            | 12                    | 1         | 1         | 1        | 1         | PEROXIREDOXIN-6.                                                                                                                               | P30041; P32077;                                                                | PRDX6_HUMAN                                                                                                                              |
| 366           | IPI00220342                                                     | DDAH1            | 285                                  | 285  | 285  | 3.1E+04                               | 3.1E+04 | 3.1E+04 | 17.9            | 3                     | 1         | 1         | 1        | 0         | NG,NG-DIMETHYLARGININE DIMETHYLAminoHYDROLASE 1.                                                                                               | Q94760; Q5HYC8; Q5VWX2; Q86XK5; Q95421; P61604; Q04984; Q53X54;                | DDAH1_HUMAN; Q5HYC8_HUMAN; Q5VWX2_HUMAN                                                                                                  |
| 367           | IPI00220362                                                     | HSPE1            | 102                                  | 102  | 102  | 1.1E+04                               | 1.1E+04 | 1.1E+04 | 51.0            | 6                     | 0         | 0         | 1        | 1         | 10 KDA HEAT SHOCK PROTEIN, MITOCHONDRIAL.                                                                                                      | Q9UNM1                                                                         | CH10_HUMAN; Q53X54_HUMAN; Q9UNM1_HUMAN                                                                                                   |
| 368           | IPI00220373                                                     | IDE              | 1019                                 | 1019 | 1019 | 1.2E+05                               | 1.2E+05 | 1.2E+05 | 2.8             | 3                     | 0         | 1         | 1        | 0         | INSULIN-DEGRADING ENZYME.                                                                                                                      | P14735; Q59GA5; Q6T5N2                                                         | IDE_HUMAN; Q59GA5_HUMAN; Q5T5N2_HUMAN                                                                                                    |
| 369           | IPI00220391; IPI00220558; IPI00783826                           | RYR1             | 5035                                 | 5040 | 5038 | 5.6E+05                               | 5.7E+05 | 5.7E+05 | 2.5             | 8                     | 0         | 0         | 1        | 1         | 565 KDA PROTEIN.; ISOFORM 2 OF RYANODINE RECEPTOR 1.; ISOFORM 1 OF RYANODINE RECEPTOR 1.                                                       | Q8WYF5; Q8WYM7; Q8WYM8; Q9NPK1; Q9P1U4                                         | ; Q75591_HUMAN; Q59FN5_HUMAN; Q8WYM7_HUMAN; Q8WYM8_HUMAN; RYR1_HUMAN                                                                     |
| 370           | IPI00220416; IPI00643836; IPI00790644; IPI00798386              | UQCRCB           | 91                                   | 140  | 110  | 1.1E+04                               | 1.6E+04 | 1.3E+04 | 31.5            | 3                     | 1         | 0         | 1        | 1         | UBIQUINOL-CYTOCHROME C REDUCTASE COMPLEX 14 KDA PROTEIN.; UQCRCB PROTEIN.; 16 KDA PROTEIN.; 12 KDA PROTEIN.                                    | P14927; Q49AB7; Q6FGD1                                                         | ; Q49AB7_HUMAN; Q6FGD1_HUMAN; UCRE_HUMAN                                                                                                 |
| 371           | IPI00220467; IPI00395442; IPI00643758                           | TNNT1            | 251                                  | 278  | 264  | 3.0E+04                               | 3.3E+04 | 3.1E+04 | 39.0            | 13                    | 1         | 1         | 1        | 1         | ISOFORM 2 OF TROPONIN T, SLOW SKELETAL MUSCLE.; ISOFORM 1 OF TROPONIN T, SLOW SKELETAL MUSCLE.; ISOFORM 3 OF TROPONIN T, SLOW SKELETAL MUSCLE. | Q5U0E1                                                                         | Q3B759_HUMAN; Q56R93_HUMAN; Q56R94_HUMAN; Q5U0E1_HUMAN; TNNT1_HUMAN                                                                      |
| 372           | IPI00220487                                                     | ATP5H            | 161                                  | 161  | 161  | 1.8E+04                               | 1.8E+04 | 1.8E+04 | 51.6            | 9                     | 0         | 0         | 1        | 1         | ISOFORM 1 OF ATP SYNTHASE D CHAIN, MITOCHONDRIAL.                                                                                              | O75947; Q9H3J4                                                                 | ATP5H_HUMAN                                                                                                                              |
| 373           | IPI00220642                                                     | YWHAG            | 247                                  | 247  | 247  | 2.8E+04                               | 2.8E+04 | 2.8E+04 | 31.6            | 8                     | 0         | 0         | 1        | 1         | 14-3-3 PROTEIN GAMMA.                                                                                                                          | O70457; P35214; P61981; Q6FH52; Q9UDP2; Q9UN99                                 | 1433G_HUMAN                                                                                                                              |
| 374           | IPI00220644                                                     | PKM2             | 531                                  | 531  | 531  | 5.8E+04                               | 5.8E+04 | 5.8E+04 | 63.7            | 53                    | 1         | 1         | 1        | 1         | ISOFORM M1 OF PYRUVATE KINASE ISOZYMES M1/M2.                                                                                                  | P14618; P14786; Q96E76; Q9BWB5; Q9LUF2                                         | KPYM_HUMAN                                                                                                                               |
| 375           | IPI00220706; IPI00554676; IPI00749035; IPI00816084; IPI00816618 | HBE1; HBG1; HBG2 | 147                                  | 158  | 152  | 1.6E+04                               | 1.7E+04 | 1.7E+04 | 36.7            | 5                     | 0         | 0         | 1        | 1         | HEMOGLOBIN SUBUNIT GAMMA-1.; HEMOGLOBIN SUBUNIT GAMMA-2.; 17 KDA PROTEIN.; GAMMA-G GLOBIN (FRAGMENT); HEMOGLOBIN GAMMA-G (FRAGMENT).           | Q14403; Q14474; Q14476; Q14491; Q549G1; Q68NH9; Q8TDA1; Q96FH6; Q96FH7; Q9UNL6 | ; HBG1_HUMAN; HBG2_HUMAN; Q14403_HUMAN; Q14474_HUMAN; Q14476_HUMAN; Q14491_HUMAN; Q549G1_HUMAN; Q8TDA1_HUMAN; Q96FH6_HUMAN; Q9UNL6_HUMAN |
| 376           | IPI00220741; IPI00641363                                        | SPTA1            | 2416                                 | 2431 | 2424 | 2.8E+05                               | 2.8E+05 | 2.8E+05 | 5.4             | 10                    | 0         | 1         | 1        | 1         | SPECTRIN ALPHA CHAIN, ERYTHROCYTE.; SPECTRIN, ALPHA, ERYTHROCYTIC 1.                                                                           | O60686; Q5VYL1; Q5VYL2                                                         | O60686_HUMAN; Q5VYL1_HUMAN; Q5VYL2_HUMAN                                                                                                 |
| 377           | IPI00220766                                                     | GLO1             | 184                                  | 184  | 184  | 2.1E+04                               | 2.1E+04 | 2.1E+04 | 18.5            | 5                     | 0         | 0         | 1        | 1         | LACTOYLGLUTATHIONE LYASE.                                                                                                                      | P78375; Q04760; Q59E0L; Q5TZW3;                                                | LGUL_HUMAN; Q59E0L_HUMAN                                                                                                                 |
| 378           | IPI00220916; IPI00375714                                        | HSPB7            | 175                                  | 258  | 217  | 1.9E+04                               | 2.8E+04 | 2.4E+04 | 32.0            | 4                     | 0         | 0         | 1        | 1         | ISOFORM 2 OF HEAT-SHOCK PROTEIN BETA-7.; HEAT SHOCK 27KDA PROTEIN FAMILY, MEMBER 7.                                                            | Q96F00; Q96J41                                                                 | HSPB7_HUMAN; Q5T502_HUMAN; Q7Z3C1_HUMAN                                                                                                  |
| 379           | IPI00221092                                                     | RPS18            | 146                                  | 146  | 146  | 1.6E+04                               | 1.6E+04 | 1.6E+04 | 22.6            | 3                     | 0         | 0         | 1        | 0         | 40S RIBOSOMAL PROTEIN S16.                                                                                                                     | Q9NU17; Q9UBY9                                                                 | R516_HUMAN                                                                                                                               |
| 380           | IPI00221127                                                     | MYLK2            | 596                                  | 596  | 596  | 6.5E+04                               | 6.5E+04 | 6.5E+04 | 21.5            | 9                     | 1         | 1         | 1        | 1         | MYOSIN LIGHT CHAIN KINASE 2, SKELETAL/CARDIAC MUSCLE.                                                                                          | P17008; P62249                                                                 | MYLK2_HUMAN                                                                                                                              |
| 381           | IPI00221222                                                     | SUB1             | 127                                  | 127  | 127  | 1.4E+04                               | 1.4E+04 | 1.4E+04 | 15.8            | 2                     | 0         | 0         | 1        | 0         | ACTIVATED RNA POLYMERASE II TRANSCRIPTIONAL COACTIVATOR P15.                                                                                   | Q569L1; Q96I84; Q9H1R3                                                         | Q59G24_HUMAN; Q6IBA2_HUMAN; TCP4_HUMAN                                                                                                   |

| Protein Group | IPI ID                                             | IPI gene name | Amino Acids in Sequence <sup>1</sup> |      |      | Protein Molecular Weight <sup>1</sup> |         |         | Seq. Cov. (max) | Unique Peptides (max) | Detection |           |          |           | Protein name                                                                                                                                                                                                                                                                                                                                                                                    | Uniprot Id                                                                                                                                                                                     | Uniprot Entry Name                                                               |
|---------------|----------------------------------------------------|---------------|--------------------------------------|------|------|---------------------------------------|---------|---------|-----------------|-----------------------|-----------|-----------|----------|-----------|-------------------------------------------------------------------------------------------------------------------------------------------------------------------------------------------------------------------------------------------------------------------------------------------------------------------------------------------------------------------------------------------------|------------------------------------------------------------------------------------------------------------------------------------------------------------------------------------------------|----------------------------------------------------------------------------------|
|               |                                                    |               | Min.                                 | Max. | Mean | Min.                                  | Max.    | Mean    |                 |                       | Expt. I-1 | Expt. I-2 | Expt. II | Expt. III |                                                                                                                                                                                                                                                                                                                                                                                                 |                                                                                                                                                                                                |                                                                                  |
| 382           | IPI00221305                                        | CAMK2B        | 666                                  | 666  | 666  | 7.3E+04                               | 7.3E+04 | 7.3E+04 | 12.6            | 7                     | 1         | 1         | 1        | 1         | CALCIUM/CALMODULIN-DEPENDENT PROTEIN KINASE IIB ISOFORM 1.                                                                                                                                                                                                                                                                                                                                      |                                                                                                                                                                                                |                                                                                  |
| 383           | IPI00239077                                        | HINT1         | 126                                  | 126  | 126  | 1.4E+04                               | 1.4E+04 | 1.4E+04 | 50.0            | 3                     | 1         | 0         | 1        | 1         | HISTIDINE TRIAD NUCLEOTIDE-BINDING PROTEIN 1.                                                                                                                                                                                                                                                                                                                                                   | P49773; Q9H5V8; P08590; Q14909; Q9NR58                                                                                                                                                         | HINT1_HUMAN                                                                      |
| 384           | IPI00243742                                        | MYL3          | 195                                  | 195  | 195  | 2.2E+04                               | 2.2E+04 | 2.2E+04 | 68.2            | 21                    | 1         | 1         | 1        | 1         | MYOSIN LIGHT POLYPEPTIDE 3.                                                                                                                                                                                                                                                                                                                                                                     |                                                                                                                                                                                                | MYL3_HUMAN; Q14909_HUMAN                                                         |
| 385           | IPI00246058                                        | PDCD6IP       | 873                                  | 873  | 873  | 9.7E+04                               | 9.7E+04 | 9.7E+04 | 8.7             | 6                     | 1         | 1         | 1        | 1         | PDCD6IP PROTEIN.                                                                                                                                                                                                                                                                                                                                                                                | Q4W4Y1; Q6NUS1; O60550; P21266; Q59EJ5; Q6FGJ9; Q96HA3                                                                                                                                         | Q4W4Y1_HUMAN; Q6NUS1_HUMAN; GSTM3_HUMAN; Q59EJ5_HUMAN; Q6FGJ9_HUMAN              |
| 386           | IPI00246975                                        | GSTM3         | 225                                  | 225  | 225  | 2.7E+04                               | 2.7E+04 | 2.7E+04 | 13.8            | 3                     | 0         | 0         | 1        | 0         | GLUTATHIONE S-TRANSFERASE MU 3. ISOFORM 1 OF PROBABLE G-PROTEIN COUPLED RECEPTOR 123.; ISOFORM 2 OF PROBABLE G-PROTEIN COUPLED RECEPTOR 123.                                                                                                                                                                                                                                                    | Q5T234; Q86SN7; Q86S06; Q96J99; P31939; Q13856; Q53S28                                                                                                                                         | GP123_HUMAN                                                                      |
| 387           | IPI00255554; IPI00410073                           | GPR123        | 1280                                 | 1280 | 1280 | 1.4E+05                               | 1.4E+05 | 1.4E+05 | 1.4             | 2                     | 0         | 0         | 1        | 0         | BIFUNCTIONAL PURINE BIOSYNTHESIS PROTEIN PURH.                                                                                                                                                                                                                                                                                                                                                  | P17655; Q16738; Q59EF6; Q6PJT3; Q8WU26; Q98B81; Q5BJD7; Q8NCI8; Q96CU1; Q96SV2; Q9NTK5; Q9P1D3; Q9UNY9; Q9Y6G4                                                                                 | PUR9_HUMAN; Q53S28_HUMAN                                                         |
| 388           | IPI00289499                                        | ATIC          | 592                                  | 592  | 592  | 6.5E+04                               | 6.5E+04 | 6.5E+04 | 19.3            | 7                     | 1         | 1         | 1        | 0         | CALPAIN-2 CATALYTIC SUBUNIT PRECURSOR.                                                                                                                                                                                                                                                                                                                                                          | Q59817; Q49A47; Q53H87; Q53HP5; Q59G10; Q68CS1; P17987; Q15556; Q5TCM3                                                                                                                         | CAN2_HUMAN; Q59EF6_HUMAN                                                         |
| 389           | IPI00289758                                        | CAPN2         | 700                                  | 700  | 700  | 8.0E+04                               | 8.0E+04 | 8.0E+04 | 4.6             | 3                     | 0         | 0         | 1        | 0         | ISOFORM 1 OF PUTATIVE GTP-BINDING PROTEIN 9. 10-FORMYL-TETRAHYDROFOLATE DEHYDROGENASE.; FORMYL-TETRAHYDROFOLATE DEHYDROGENASE ISOFORM A VARIANT.                                                                                                                                                                                                                                                | Q9UNY9; Q9Y6G4; Q75891; Q49A47; Q53H87; Q53HP5; Q59G10; Q68CS1; P17987; Q15556; Q5TCM3                                                                                                         | GTPB9_HUMAN; FTHFD_HUMAN; Q49A47_HUMAN; Q53H87_HUMAN; Q53HP5_HUMAN; Q59G10_HUMAN |
| 390           | IPI00290416                                        | GTPBP9        | 396                                  | 396  | 396  | 4.5E+04                               | 4.5E+04 | 4.5E+04 | 20.7            | 7                     | 1         | 1         | 1        | 1         | T-COMPLEX PROTEIN 1 SUBUNIT ALPHA. CHAPERONIN CONTAINING TCP1, SUBUNIT 3 ISOFORM B.; CHAPERONIN CONTAINING TCP1, SUBUNIT 3 ISOFORM C.; T-COMPLEX PROTEIN 1 SUBUNIT GAMMA.; 60 KDA PROTEIN.                                                                                                                                                                                                      | P49368; Q2TU64; Q59H77; Q5S2Y0; Q5SZY1; Q9BR64                                                                                                                                                 | TCPA_HUMAN                                                                       |
| 391           | IPI00290553; IPI00793673                           | ALDH1L1       | 902                                  | 912  | 907  | 9.9E+04                               | 1.0E+05 | 9.9E+04 | 13.9            | 9                     | 1         | 1         | 1        | 1         | MALATE DEHYDROGENASE, CYTOPLASMIC.                                                                                                                                                                                                                                                                                                                                                              | P40925; Q6I9V0; Q43682; P40926; Q0QF37; Q6FH20; Q75MP7; Q75MT9; P18206; Q16450; Q5JQ13; Q5SWX2; Q7Z388; Q8IXU7; P28066; Q3T1C1; Q5U0A0; Q6IBF7; P35287; P61106; Q5JVD4; Q6Q7K5; Q96910; Q9UI11 | GTPB9_HUMAN; FTHFD_HUMAN; Q49A47_HUMAN; Q53H87_HUMAN; Q53HP5_HUMAN; Q59G10_HUMAN |
| 392           | IPI00290566                                        | TCP1          | 556                                  | 556  | 556  | 6.0E+04                               | 6.0E+04 | 6.0E+04 | 18.0            | 6                     | 1         | 1         | 1        | 1         | MALATE DEHYDROGENASE, MITOCHONDRIAL PRECURSOR.                                                                                                                                                                                                                                                                                                                                                  | Q75MT9; Q75MT9; P18206; Q16450; Q5JQ13; Q5SWX2; Q7Z388; Q8IXU7; P28066; Q3T1C1; Q5U0A0; Q6IBF7; P35287; P61106; Q5JVD4; Q6Q7K5; Q96910; Q9UI11                                                 | MDHC_HUMAN; MDHM_HUMAN; Q0QF37_HUMAN; Q6FH20_HUMAN; Q75MP7_HUMAN; Q75MT9_HUMAN   |
| 393           | IPI00290770; IPI00552715; IPI00553185;             | CCT3          | 507                                  | 545  | 535  | 5.6E+04                               | 6.1E+04 | 5.9E+04 | 17.8            | 7                     | 1         | 1         | 1        | 1         | ISOFORM 1 OF VINCULIN.; ISOFORM 2 OF VINCULIN.                                                                                                                                                                                                                                                                                                                                                  | Q59H77; Q5S2Y0; Q5SZY1; Q9BR64                                                                                                                                                                 | Q2TU64_HUMAN; Q59H77_HUMAN; Q5S2Y0_HUMAN; TPCG_HUMAN                             |
| 394           | IPI00291005                                        | MDH1          | 334                                  | 334  | 334  | 3.6E+04                               | 3.6E+04 | 3.6E+04 | 40.1            | 11                    | 1         | 1         | 1        | 1         | MALATE DEHYDROGENASE, MITOCHONDRIAL PRECURSOR.                                                                                                                                                                                                                                                                                                                                                  | P40925; Q6I9V0; Q43682; P40926; Q0QF37; Q6FH20; Q75MP7; Q75MT9; P18206; Q16450; Q5JQ13; Q5SWX2; Q7Z388; Q8IXU7; P28066; Q3T1C1; Q5U0A0; Q6IBF7; P35287; P61106; Q5JVD4; Q6Q7K5; Q96910; Q9UI11 | MDHC_HUMAN; MDHM_HUMAN; Q0QF37_HUMAN; Q6FH20_HUMAN; Q75MP7_HUMAN; Q75MT9_HUMAN   |
| 395           | IPI00291006                                        | MDH2          | 338                                  | 338  | 338  | 3.6E+04                               | 3.6E+04 | 3.6E+04 | 48.8            | 16                    | 1         | 1         | 1        | 1         | ISOFORM 1 OF VINCULIN.; ISOFORM 2 OF VINCULIN.                                                                                                                                                                                                                                                                                                                                                  | Q59H77; Q5S2Y0; Q5SZY1; Q9BR64                                                                                                                                                                 | MDHC_HUMAN; MDHM_HUMAN; Q0QF37_HUMAN; Q6FH20_HUMAN; Q75MP7_HUMAN; Q75MT9_HUMAN   |
| 396           | IPI00291175; IPI00307162                           | VCL           | 1066                                 | 1134 | 1100 | 1.2E+05                               | 1.2E+05 | 1.2E+05 | 37.6            | 31                    | 1         | 1         | 1        | 1         | ISOFORM 1 OF VINCULIN.; ISOFORM 2 OF VINCULIN.                                                                                                                                                                                                                                                                                                                                                  | Q59H77; Q5S2Y0; Q5SZY1; Q9BR64                                                                                                                                                                 | Q5JQ13_HUMAN; VINC_HUMAN                                                         |
| 397           | IPI00291922                                        | PSMA5         | 241                                  | 241  | 241  | 2.6E+04                               | 2.6E+04 | 2.6E+04 | 13.3            | 2                     | 0         | 0         | 1        | 1         | PROTEASOME SUBUNIT ALPHA TYPE 5.                                                                                                                                                                                                                                                                                                                                                                | Q5U0A0; Q6IBF7; P35287; P61106; Q5JVD4; Q6Q7K5; Q96910; Q9UI11                                                                                                                                 | PSA5_HUMAN; Q5U0A0_HUMAN                                                         |
| 398           | IPI00291928; IPI00646415                           | RAB14         | 181                                  | 215  | 198  | 2.0E+04                               | 2.4E+04 | 2.2E+04 | 19.3            | 3                     | 0         | 0         | 1        | 0         | RAS-RELATED PROTEIN RAB-14.; 20 KDA PROTEIN. DNA DAMAGE-BINDING PROTEIN 1.; 127 KDA PROTEIN.; DAMAGE-SPECIFIC DNA BINDING PROTEIN 1.; SIMILAR TO DNA DAMAGE-BINDING PROTEIN 1 (DAMAGE-SPECIFIC DNA-BINDING PROTEIN 1) (UV-DAMAGED DNA-BINDING FACTOR) (DDB P127 SUBUNIT) (DDBA)(UV-DAMAGED DNA-BINDING PROTEIN 1) (UV-DDB 1) (XERODERMA PIGMENTOSUMGROUP E-COMPLEMENTING PROTEIN) (XPCE) (XP... | O15176; Q13289; Q16531; Q58F96; Q00774; Q60787; P30046; Q13534; Q53Y51                                                                                                                         | ; RAB14_HUMAN                                                                    |
| 399           | IPI00293464; IPI00784120; IPI00786914; IPI00787250 | DDB1          | 1057                                 | 1140 | 1119 | 1.2E+05                               | 1.3E+05 | 1.2E+05 | 5.5             | 5                     | 0         | 1         | 1        | 1         | D-DOPACHROME DECARBOXYLASE.; SIMILAR TO D-DOPACHROME TAUTOMERASE.                                                                                                                                                                                                                                                                                                                               | O15176; Q13289; Q16531; Q58F96; Q00774; Q60787; P30046; Q13534; Q53Y51                                                                                                                         | ; DDB1_HUMAN                                                                     |
| 400           | IPI00293867; IPI00472043                           | DDT           | 118                                  | 134  | 126  | 1.3E+04                               | 1.4E+04 | 1.3E+04 | 21.2            | 2                     | 0         | 0         | 1        | 0         | GLUTATHIONE PEROXIDASE 1 ISOFORM 1.                                                                                                                                                                                                                                                                                                                                                             | Q6NSD4; Q49A71; Q8NI45; Q98807; Q98TT7; Q9H075; Q9UEW5; Q9UNR5                                                                                                                                 | ; DDDP_HUMAN; Q53Y51_HUMAN                                                       |
| 401           | IPI00293975                                        | GPX1          | 203                                  | 203  | 203  | 2.2E+04                               | 2.2E+04 | 2.2E+04 | 17.2            | 3                     | 0         | 0         | 1        | 1         | GLUTATHIONE PEROXIDASE 1 ISOFORM 1.                                                                                                                                                                                                                                                                                                                                                             | Q6NSD4; Q49A71; Q8NI45; Q98807; Q98TT7; Q9H075; Q9UEW5; Q9UNR5                                                                                                                                 | Q6NSD4_HUMAN                                                                     |
| 402           | IPI00294073                                        | COQ7          | 217                                  | 217  | 217  | 2.4E+04                               | 2.4E+04 | 2.4E+04 | 13.4            | 2                     | 0         | 0         | 1        | 1         | UBIQUINONE BIOSYNTHESIS PROTEIN COQ7 HOMOLOG.                                                                                                                                                                                                                                                                                                                                                   | Q49A71; Q8NI45; Q98807; Q98TT7; Q9H075; Q9UEW5; Q9UNR5                                                                                                                                         | COQ7_HUMAN; Q49A71_HUMAN; Q8NI45_HUMAN; Q98TT7_HUMAN; Q9H075_HUMAN               |
| 403           | IPI00294186; IPI00749059                           | LACTB         | 547                                  | 547  | 547  | 6.1E+04                               | 6.1E+04 | 6.1E+04 | 17.0            | 6                     | 1         | 1         | 1        | 0         | ISOFORM 1 OF SERINE BETA-LACTAMASE-LIKE PROTEIN LACTB, MITOCHONDRIALPRECURSOR.; LACTB PROTEIN, PROTEIN-ARGININE DEIMINASE TYPE-2.                                                                                                                                                                                                                                                               | P83096; P83111; Q9UPN2; Q9Y2J8                                                                                                                                                                 | ; LACTB_HUMAN                                                                    |
| 404           | IPI00294187                                        | PADI2         | 665                                  | 665  | 665  | 7.6E+04                               | 7.6E+04 | 7.6E+04 | 20.9            | 11                    | 1         | 1         | 1        | 1         | ISOFORM 1 OF HYDROXYACYL-COENZYME A DEHYDROGENASE, MITOCHONDRIALPRECURSOR.; ISOFORM 2 OF HYDROXYACYL-COENZYME A DEHYDROGENASE, MITOCHONDRIALPRECURSOR. SUCCINATE DEHYDROGENASE [UBIQUINONE] IRON-SULFUR SUBUNIT, MITOCHONDRIAL PRECURSOR.                                                                                                                                                       | O00324; Q00397; Q00753; Q16836; Q4W5B4; P21912; Q0QEY7; Q70S8X; Q9NQ12; Q75112; Q5K6N9; Q5K6P0; Q5K6P1; Q96FH2; Q9Y4Z3; Q9Y4Z4; Q9Y4Z5                                                         | PADI2_HUMAN                                                                      |
| 405           | IPI00294398; IPI00298406                           | HADH          | 314                                  | 390  | 352  | 3.4E+04                               | 4.2E+04 | 3.8E+04 | 34.4            | 9                     | 1         | 1         | 1        | 1         | ISOFORM 1 OF HYDROXYACYL-COENZYME A DEHYDROGENASE, MITOCHONDRIALPRECURSOR. SUCCINATE DEHYDROGENASE [UBIQUINONE] IRON-SULFUR SUBUNIT, MITOCHONDRIAL PRECURSOR.                                                                                                                                                                                                                                   | O00324; Q00397; Q00753; Q16836; Q4W5B4; P21912; Q0QEY7; Q70S8X; Q9NQ12; Q75112; Q5K6N9; Q5K6P0; Q5K6P1; Q96FH2; Q9Y4Z3; Q9Y4Z4; Q9Y4Z5                                                         | HCDH_HUMAN; Q4W5B4_HUMAN; HDSB_HUMAN; Q0QEY7_HUMAN; Q70S8X_HUMAN                 |
| 406           | IPI00294911                                        | SDHB          | 280                                  | 280  | 280  | 3.2E+04                               | 3.2E+04 | 3.2E+04 | 23.6            | 6                     | 1         | 1         | 1        | 1         | ISOFORM 2 OF LIM DOMAIN-BINDING PROTEIN 3. CARBONYL REDUCTASE [NADPH] 1.                                                                                                                                                                                                                                                                                                                        | P23381; P78534; P78535; Q502Y0; Q53XB6; Q9UJL3                                                                                                                                                 | LDB3_HUMAN                                                                       |
| 407           | IPI00294959                                        | LDB3          | 617                                  | 617  | 617  | 6.7E+04                               | 6.7E+04 | 6.7E+04 | 40.4            | 22                    | 1         | 1         | 1        | 1         | ISOFORM 2 OF LIM DOMAIN-BINDING PROTEIN 3. CARBONYL REDUCTASE [NADPH] 1.                                                                                                                                                                                                                                                                                                                        | P23381; P78534; P78535; Q502Y0; Q53XB6; Q9UJL3                                                                                                                                                 | LDB3_HUMAN                                                                       |
| 408           | IPI00295398                                        | CBR1          | 277                                  | 277  | 277  | 3.0E+04                               | 3.0E+04 | 3.0E+04 | 18.4            | 4                     | 0         | 0         | 1        | 1         | TRYPTOPHANYL-TRNA SYNTHETASE, CYTOPLASMIC.; TRYPTOPHANYL-TRNA SYNTHETASE ISOFORM B. GLYCEROL-3-PHOSPHATE DEHYDROGENASE [NAD+], CYTOPLASMIC.; 35 KDA PROTEIN.                                                                                                                                                                                                                                    | P23381; P78534; P78535; Q502Y0; Q53XB6; Q9UJL3                                                                                                                                                 | ; P78534_HUMAN; Q502Y0_HUMAN; Q53XB6_HUMAN; SYWC_HUMAN                           |
| 409           | IPI00295400; IPI00412737                           | WARS          | 430                                  | 471  | 451  | 4.9E+04                               | 5.3E+04 | 5.1E+04 | 18.7            | 5                     | 1         | 1         | 1        | 0         | TRYPTOPHANYL-TRNA SYNTHETASE, CYTOPLASMIC.; TRYPTOPHANYL-TRNA SYNTHETASE ISOFORM B. GLYCEROL-3-PHOSPHATE DEHYDROGENASE [NAD+], CYTOPLASMIC.; 35 KDA PROTEIN.                                                                                                                                                                                                                                    | P21695; Q8N1B0                                                                                                                                                                                 | ; GPPA_HUMAN                                                                     |
| 410           | IPI00295777; IPI00797300                           | GPD1          | 326                                  | 349  | 338  | 3.5E+04                               | 3.8E+04 | 3.6E+04 | 41.6            | 14                    | 1         | 1         | 1        | 1         | ISOFORM MITOCHONDRIAL OF FUMARATE HYDRATASE, MITOCHONDRIAL PRECURSOR.; ISOFORM CYTOPLASMIC OF FUMARATE HYDRATASE, MITOCHONDRIAL PRECURSOR.                                                                                                                                                                                                                                                      | P07954; Q5SY06                                                                                                                                                                                 | FUMH_HUMAN; Q5SY06_HUMAN                                                         |
| 411           | IPI00296053; IPI00759715                           | FH            | 467                                  | 510  | 489  | 5.0E+04                               | 5.5E+04 | 5.2E+04 | 40.2            | 14                    | 1         | 1         | 1        | 1         | ISOFORM MITOCHONDRIAL OF FUMARATE HYDRATASE, MITOCHONDRIAL PRECURSOR.; ISOFORM CYTOPLASMIC OF FUMARATE HYDRATASE, MITOCHONDRIAL PRECURSOR.                                                                                                                                                                                                                                                      | P07954; Q5SY06                                                                                                                                                                                 | FUMH_HUMAN; Q5SY06_HUMAN                                                         |

| Protein Group* | IPI ID                                                          | IPI gene name  | Amino Acids in Sequence <sup>1</sup> |      |      | Protein Molecular Weight <sup>1</sup> |         |         | Seq. Cov. (max) | Unique Peptides (max) | Detection |           |          |           | Protein name                                                                                                                                                            | Uniprot Id                                                                                                                                                             | Uniprot Entry Name                                                                                                                                     |
|----------------|-----------------------------------------------------------------|----------------|--------------------------------------|------|------|---------------------------------------|---------|---------|-----------------|-----------------------|-----------|-----------|----------|-----------|-------------------------------------------------------------------------------------------------------------------------------------------------------------------------|------------------------------------------------------------------------------------------------------------------------------------------------------------------------|--------------------------------------------------------------------------------------------------------------------------------------------------------|
|                |                                                                 |                | Min.                                 | Max. | Mean | Min.                                  | Max.    | Mean    |                 |                       | Expt. I-1 | Expt. I-2 | Expt. II | Expt. III |                                                                                                                                                                         |                                                                                                                                                                        |                                                                                                                                                        |
| 412            | IPI00296190; IPI00646289; IPI00646889                           | C10orf58       | 218                                  | 229  | 224  | 2.4E+04                               | 2.6E+04 | 2.5E+04 | 10.0            | 2                     | 0         | 0         | 1        | 0         | UNCHARACTERIZED PROTEIN C10ORF58 PRECURSOR.; 25 KDA PROTEIN.; 24 KDA PROTEIN.                                                                                           | Q6UW08; Q8N2K3; Q8NBK9; Q96JR0; Q8BRX8                                                                                                                                 | ; CJ058_HUMAN                                                                                                                                          |
| 413            | IPI00296635                                                     | GBE1           | 702                                  | 702  | 702  | 8.0E+04                               | 8.0E+04 | 8.0E+04 | 9.3             | 5                     | 1         | 1         | 1        | 0         | 1,4-ALPHA-GLUCAN BRANCHING ENZYME.                                                                                                                                      | Q04446; Q59E70; Q98E00                                                                                                                                                 | GLGB_HUMAN; Q59E70_HUMAN                                                                                                                               |
| 414            | IPI00297779                                                     | CCT2           | 535                                  | 535  | 535  | 5.7E+04                               | 5.7E+04 | 5.7E+04 | 28.4            | 10                    | 1         | 1         | 1        | 1         | T-COMPLEX PROTEIN 1 SUBUNIT BETA. PYRUVATE DEHYDROGENASE PROTEIN X COMPONENT, MITOCHONDRIAL PRECURSOR.                                                                  | P78371; Q14D36; Q6IAT3; Q9H369; O00330; Q60221; Q96FV8; Q99783; O14805; Q6DR95; Q7LFU2; Q99497; O14958; Q5T1D2; Q8TBW8                                                 | Q9H369_HUMAN; TCPB_HUMAN                                                                                                                               |
| 415            | IPI00298423                                                     | PDHX           | 501                                  | 501  | 501  | 5.4E+04                               | 5.4E+04 | 5.4E+04 | 30.3            | 11                    | 1         | 1         | 1        | 1         | PROTEIN DJ-1.                                                                                                                                                           | O14980; Q63HP8; Q68CP3; Q99433; O43846; Q05D08; Q6PIN5; Q9UM59; Q9UQ80                                                                                                 | ODPX_HUMAN                                                                                                                                             |
| 416            | IPI00298547                                                     | PARK7          | 189                                  | 189  | 189  | 2.0E+04                               | 2.0E+04 | 2.0E+04 | 31.8            | 4                     | 1         | 1         | 1        | 1         | PROTEIN DJ-1.                                                                                                                                                           | O14980; Q63HP8; Q68CP3; Q99433; O43846; Q05D08; Q6PIN5; Q9UM59; Q9UQ80                                                                                                 | PARK7_HUMAN                                                                                                                                            |
| 417            | IPI00298933                                                     | CASQ2          | 399                                  | 399  | 399  | 4.6E+04                               | 4.6E+04 | 4.6E+04 | 28.8            | 10                    | 1         | 1         | 1        | 1         | CALSEQUESTRIN-2 PRECURSOR.                                                                                                                                              | O14980; Q63HP8; Q68CP3; Q99433; O43846; Q05D08; Q6PIN5; Q9UM59; Q9UQ80                                                                                                 | CASQ2_HUMAN; Q5T1D2_HUMAN                                                                                                                              |
| 418            | IPI00298961; IPI00784388                                        | XPO1           | 1070                                 | 1071 | 1071 | 1.2E+05                               | 1.2E+05 | 1.2E+05 | 6.6             | 5                     | 1         | 1         | 1        | 0         | EXPORTIN-1.; 123 KDA PROTEIN.                                                                                                                                           | O00191; O00505; O43195; Q53F09; Q5W028; Q8IYQ9; Q96AA7                                                                                                                 | ; XPO1_HUMAN                                                                                                                                           |
| 419            | IPI00299000; IPI00794875; IPI00807557                           | PA2G4          | 372                                  | 406  | 391  | 4.1E+04                               | 4.5E+04 | 4.3E+04 | 13.6            | 5                     | 1         | 1         | 1        | 1         | PROLIFERATION-ASSOCIATED PROTEIN 2G4.; 41 KDA PROTEIN.; HYPOTHETICAL PROTEIN (FRAGMENT).                                                                                | O00191; O00505; O43195; Q53F09; Q5W028; Q8IYQ9; Q96AA7                                                                                                                 | ; PA2G4_HUMAN; Q05D08_HUMAN; Q6PIN5_HUMAN                                                                                                              |
| 420            | IPI00299033                                                     | KPNA3          | 521                                  | 521  | 521  | 5.8E+04                               | 5.8E+04 | 5.8E+04 | 14.8            | 6                     | 1         | 1         | 1        | 1         | IMPORTIN ALPHA-3 SUBUNIT. PROTEASOME SUBUNIT ALPHA TYPE 4.; PSMA4                                                                                                       | P25789; Q53XP2; Q7Z474; Q8TBD1; O00757; Q17R39; Q6FI53; Q9UJ73; Q9UMQ9; Q9UMR0; Q05BX4; Q05CW6; Q24JU0; Q53T12; Q6GMU5; Q6P2P4; Q6PJM7; Q6PKG9; Q88VJ1; Q9IV79; Q99460 | IMA3_HUMAN; Q53F09_HUMAN; Q5W028_HUMAN; Q8IYQ9_HUMAN                                                                                                   |
| 421            | IPI00299155; IPI00789638; IPI00790038; IPI00790207; IPI00795606 | PSMA4          | 225                                  | 261  | 238  | 2.5E+04                               | 2.9E+04 | 2.7E+04 | 9.7             | 3                     | 0         | 0         | 1        | 1         | PROTEIN.; 25 KDA PROTEIN.; 27 KDA PROTEIN.; 26 KDA PROTEIN.                                                                                                             | P25789; Q53XP2; Q7Z474; Q8TBD1; O00757; Q17R39; Q6FI53; Q9UJ73; Q9UMQ9; Q9UMR0; Q05BX4; Q05CW6; Q24JU0; Q53T12; Q6GMU5; Q6P2P4; Q6PJM7; Q6PKG9; Q88VJ1; Q9IV79; Q99460 | ; PSA4_HUMAN; Q53XP2_HUMAN; Q7Z474_HUMAN                                                                                                               |
| 422            | IPI00299456                                                     | FBP2           | 339                                  | 339  | 339  | 3.7E+04                               | 3.7E+04 | 3.7E+04 | 33.0            | 10                    | 1         | 1         | 1        | 1         | FRUCTOSE-1,6-BISPHOSPHATASE ISOZYME 2.                                                                                                                                  | Q96NV4; Q9H0R4; P42126; Q13290; Q7Z2L6; Q7Z2L7; Q96DC0; Q98UB8; Q98W05                                                                                                 | F16P2_HUMAN; Q9UJ73_HUMAN; Q9UMQ9_HUMAN; Q9UMR0_HUMAN                                                                                                  |
| 423            | IPI00299608; IPI00456695                                        | PSMD1          | 922                                  | 953  | 938  | 1.0E+05                               | 1.1E+05 | 1.0E+05 | 8.8             | 5                     | 1         | 1         | 1        | 1         | ISOFORM 1 OF 26S PROTEASOME NON-ATPASE REGULATORY SUBUNIT 1.; ISOFORM 2 OF 26S PROTEASOME NON-ATPASE REGULATORY SUBUNIT 1.                                              | Q96NV4; Q9H0R4; P42126; Q13290; Q7Z2L6; Q7Z2L7; Q96DC0; Q98UB8; Q98W05                                                                                                 | PSMD1_HUMAN; Q05BX4_HUMAN; Q05CW6_HUMAN                                                                                                                |
| 424            | IPI00299977                                                     | PHPT1          | 125                                  | 125  | 125  | 1.4E+04                               | 1.4E+04 | 1.4E+04 | 26.4            | 3                     | 0         | 0         | 1        | 1         | 14 KDA PHOSPHOHISTIDINE PHOSPHATASE.                                                                                                                                    | Q98W05; Q9H0Y3; Q9NRX4; Q95708; Q4ZFX1; Q57ZJ5; Q98R63; Q9NSD9; Q9NZ26                                                                                                 | PHPT1_HUMAN; Q5T5S3_HUMAN; Q6FIE5_HUMAN                                                                                                                |
| 425            | IPI00300074                                                     | FARSB          | 589                                  | 589  | 589  | 6.6E+04                               | 6.6E+04 | 6.6E+04 | 9.5             | 5                     | 1         | 1         | 1        | 1         | PHENYLALANYL-TRNA SYNTHETASE BETA CHAIN. 29 KDA PROTEIN.; HALOACID DEHALOGENASE-LIKE                                                                                    | Q96NV4; Q9H0R4; P42126; Q13290; Q7Z2L6; Q7Z2L7; Q96DC0; Q98UB8; Q98W05                                                                                                 | ; Q96NV4_HUMAN; Q9H0R4_HUMAN                                                                                                                           |
| 426            | IPI00300285; IPI00783874                                        | HDHD2          | 259                                  | 266  | 263  | 2.9E+04                               | 2.9E+04 | 2.9E+04 | 8.1             | 2                     | 0         | 0         | 1        | 1         | HYDROLASE DOMAIN CONTAINING 2. ISOFORM 1 OF 3,2-TRANS-ENYL-COA ISOMERASE, MITOCHONDRIAL PRECURSOR.; ISOFORM 2 OF 3,2-TRANS-ENYL-COA ISOMERASE, MITOCHONDRIAL PRECURSOR. | Q96NV4; Q9H0R4; P42126; Q13290; Q7Z2L6; Q7Z2L7; Q96DC0; Q98UB8; Q98W05                                                                                                 | ; Q96NV4_HUMAN; Q9H0R4_HUMAN                                                                                                                           |
| 427            | IPI00300567; IPI00398758                                        | DCI            | 285                                  | 302  | 294  | 3.1E+04                               | 3.3E+04 | 3.2E+04 | 14.6            | 4                     | 1         | 1         | 1        | 1         | ISOFORM 1 OF TRIPARTITE MOTIF-CONTAINING PROTEIN 72.                                                                                                                    | Q96NV4; Q9H0R4; P42126; Q13290; Q7Z2L6; Q7Z2L7; Q96DC0; Q98UB8; Q98W05                                                                                                 | D3D2_HUMAN; Q96DC0_HUMAN                                                                                                                               |
| 428            | IPI00301028                                                     | TRIM72         | 477                                  | 477  | 477  | 5.3E+04                               | 5.3E+04 | 5.3E+04 | 37.3            | 14                    | 1         | 1         | 1        | 1         | COP9 SIGNALOSOME COMPLEX SUBUNIT 7A.; 18 KDA PROTEIN.                                                                                                                   | Q6ZMU5; Q8N4X6; Q8NB09                                                                                                                                                 | TRIM72_HUMAN                                                                                                                                           |
| 429            | IPI00301419; IPI00798179                                        | COP57A         | 166                                  | 275  | 221  | 1.8E+04                               | 3.0E+04 | 2.4E+04 | 7.6             | 2                     | 0         | 0         | 1        | 1         | ISOFORM SGCA-1 OF ALPHA-SARCOGLYCAN PRECURSOR.; ISOFORM SGCA-2 OF ALPHA-SARCOGLYCAN PRECURSOR.; 43 KDA PROTEIN.                                                         | Q567U8; Q9NVX3; Q9UBW8; Q9UJW4                                                                                                                                         | ; CSN7A_HUMAN; Q567U8_HUMAN                                                                                                                            |
| 430            | IPI00301464; IPI00412663; IPI00783326                           | SGCA           | 263                                  | 387  | 346  | 2.9E+04                               | 4.3E+04 | 3.8E+04 | 10.3            | 3                     | 1         | 1         | 1        | 0         | ISOFORM SGCA-1 OF ALPHA-SARCOGLYCAN PRECURSOR.; ISOFORM SGCA-2 OF ALPHA-SARCOGLYCAN PRECURSOR.; 43 KDA PROTEIN.                                                         | Q13710; Q13712; Q16586                                                                                                                                                 | ; SGCA_HUMAN                                                                                                                                           |
| 431            | IPI00302592; IPI00333541; IPI00644576                           | FLNA           | 2607                                 | 2647 | 2631 | 2.8E+05                               | 2.8E+05 | 2.8E+05 | 6.0             | 11                    | 1         | 0         | 1        | 1         | FILAMIN A, ALPHA.; FILAMIN-A.; FILAMIN A, ALPHA. CHAPERONIN CONTAINING TCP1, SUBUNIT 8 (THETA) VARIANT.; T-COMPLEX PROTEIN 1 SUBUNIT THETA.                             | P21333; Q5HY53; Q5HY54; Q5HY55; Q60FE5; Q60FE6; Q6NXF2; Q86TQ3; Q8NF52; Q8TES4; Q96C61                                                                                 | FLNA_HUMAN; Q5HY53_HUMAN; Q5HY54_HUMAN; Q5HY55_HUMAN; Q60FE5_HUMAN; Q60FE6_HUMAN; Q6NXF2_HUMAN; Q86TQ3_HUMAN; Q8NF52_HUMAN; Q8TES4_HUMAN; Q96C61_HUMAN |
| 432            | IPI00302925; IPI00784090                                        | CCT8           | 548                                  | 550  | 549  | 6.0E+04                               | 6.0E+04 | 6.0E+04 | 21.0            | 10                    | 1         | 1         | 1        | 1         | LIM AND CYSTEINE-RICH DOMAINS PROTEIN 1.                                                                                                                                | P50990; Q4VBP8; Q53HU0; Q7Z759                                                                                                                                         | Q53HU0_HUMAN; Q7Z759_HUMAN; TCP0_HUMAN                                                                                                                 |
| 433            | IPI00303258                                                     | LMCD1          | 365                                  | 365  | 365  | 4.1E+04                               | 4.1E+04 | 4.1E+04 | 34.3            | 10                    | 1         | 1         | 1        | 1         | ATP SYNTHASE SUBUNIT BETA, MITOCHONDRIAL PRECURSOR.                                                                                                                     | Q9NZU5; P06576; Q0QEN7; Q14283                                                                                                                                         | LMCD1_HUMAN                                                                                                                                            |
| 434            | IPI00303476                                                     | ATP5B          | 529                                  | 529  | 529  | 5.7E+04                               | 5.7E+04 | 5.7E+04 | 75.4            | 40                    | 1         | 1         | 1        | 1         | PROSTAGLANDIN E SYNTHASE 2.; PROSTAGLANDIN E SYNTHASE 2 ISOFORM 2.; 29 KDA PROTEIN.                                                                                     | Q53EW9; Q5SYV6; Q96G10; Q96GL2; Q9H727                                                                                                                                 | ATPB_HUMAN; Q0QEN7_HUMAN                                                                                                                               |
| 435            | IPI00303568; IPI00395565; IPI00514138                           | PTGES2         | 186                                  | 377  | 276  | 2.1E+04                               | 4.2E+04 | 3.1E+04 | 14.0            | 2                     | 0         | 0         | 1        | 1         | ISOFORM B OF MANNOSE-6-PHOSPHATE RECEPTOR-BINDING PROTEIN 1.                                                                                                            | O60664; Q53G77; Q9BS03; Q9UBD7; Q9UP92                                                                                                                                 | ; PTGES2_HUMAN                                                                                                                                         |
| 436            | IPI00303882                                                     | M6PRBP1        | 434                                  | 434  | 434  | 4.7E+04                               | 4.7E+04 | 4.7E+04 | 28.3            | 8                     | 1         | 1         | 1        | 1         | HEAT SHOCK 70 KDA PROTEIN 1.; HEAT SHOCK 70KDA PROTEIN 1B. [SUCCINATE DEHYDROGENASE [UBIQUINONE] FLAVOPROTEIN SUBUNIT, MITOCHONDRIAL PRECURSOR.                         | P08107; P19790; Q59EJ3; Q5JQI4; Q5SP17; Q9UOC1; Q9UQL9; Q9UCM0                                                                                                         | M6PRBP_HUMAN                                                                                                                                           |
| 437            | IPI00304925; IPI00807640                                        | HSPA1A; HSPA1B | 641                                  | 641  | 641  | 7.0E+04                               | 7.0E+04 | 7.0E+04 | 38.5            | 19                    | 1         | 1         | 1        | 1         | UBIQUINOL-CYTOCHROME-C REDUCTASE COMPLEX CORE PROTEIN 2, MITOCHONDRIAL PRECURSOR.                                                                                       | P31040; Q0QF12; Q16395; Q59GW8; Q9UMY5                                                                                                                                 | HSP71_HUMAN; Q59EJ3_HUMAN; Q5JQI4_HUMAN; Q9UOC1_HUMAN                                                                                                  |
| 438            | IPI00305166                                                     | SDHA           | 664                                  | 664  | 664  | 7.3E+04                               | 7.3E+04 | 7.3E+04 | 21.8            | 12                    | 1         | 1         | 1        | 1         | FLAVOPROTEIN SUBUNIT, MITOCHONDRIAL PRECURSOR.                                                                                                                          | Q16395; Q59GW8; Q9UMY5                                                                                                                                                 | DHSA_HUMAN; Q0QF12_HUMAN; Q59GW8_HUMAN                                                                                                                 |
| 439            | IPI00305383                                                     | UQCRC2         | 453                                  | 453  | 453  | 4.8E+04                               | 4.8E+04 | 4.8E+04 | 40.8            | 12                    | 1         | 1         | 1        | 1         | FLAVOPROTEIN SUBUNIT, MITOCHONDRIAL PRECURSOR.                                                                                                                          | P22695; Q9BQ05                                                                                                                                                         | UQCRC2_HUMAN                                                                                                                                           |
| 440            | IPI00305978                                                     | AKR7A2         | 359                                  | 359  | 359  | 4.0E+04                               | 4.0E+04 | 4.0E+04 | 9.5             | 2                     | 1         | 1         | 1        | 1         | AFLATOXIN B1 ALDEHYDE REDUCTASE MEMBER 2.                                                                                                                               | O43488; O75749; Q5TG63                                                                                                                                                 | ARK72_HUMAN                                                                                                                                            |

| Protein Group* | IPI ID                                             | IPI gene name | Amino Acids in Sequence <sup>1</sup> |      |      | Protein Molecular Weight <sup>1</sup> |         |         | Seq. Cov. (max) | Unique Peptides (max) | Detection |           |          |           |   | Protein name                                                                                                                                                                                                                                                             | Uniprot Id                                                                                        | Uniprot Entry Name                                                                 |
|----------------|----------------------------------------------------|---------------|--------------------------------------|------|------|---------------------------------------|---------|---------|-----------------|-----------------------|-----------|-----------|----------|-----------|---|--------------------------------------------------------------------------------------------------------------------------------------------------------------------------------------------------------------------------------------------------------------------------|---------------------------------------------------------------------------------------------------|------------------------------------------------------------------------------------|
|                |                                                    |               | Min.                                 | Max. | Mean | Min.                                  | Max.    | Mean    |                 |                       | Expt. I-1 | Expt. I-2 | Expt. II | Expt. III |   |                                                                                                                                                                                                                                                                          |                                                                                                   |                                                                                    |
| 441            | IPI00306301                                        | PDHA1         | 390                                  | 390  | 390  | 4.3E+04                               | 4.3E+04 | 4.3E+04 | 34.6            | 14                    | 1         | 1         | 1        | 1         | 1 | PYRUVATE DEHYDROGENASE E1 COMPONENT ALPHA SUBUNIT, SOMATIC FORM, MITOCHONDRIAL PRECURSOR.                                                                                                                                                                                | P08559; Q53GE3; Q53H41; Q5JPT8; Q9NP12; Q9UBJ8; Q9UBU0; Q9UNG4; Q9LNG5                            | ODPA_HUMAN; Q53GE3_HUMAN; Q53H41_HUMAN; Q5JPT8_HUMAN                               |
| 442            | IPI00306720; IPI00796142                           | COX7A1        | 79                                   | 109  | 94   | 9.1E+03                               | 1.2E+04 | 1.1E+04 | 29.1            | 2                     | 0         | 0         | 1        | 1         | 1 | CYTOCHROME C OXIDASE POLYPEPTIDE VIIIA-HEART, MITOCHONDRIAL PRECURSOR; PROTEIN. NADH DEHYDROGENASE [UBIQUINONE] IRON-SULFUR PROTEIN 7, MITOCHONDRIAL PRECURSOR.; CDNA FLJ34850 FIS, CLONE NT2NE2011758, HIGHLY SIMILAR TO NADH-UBIQUINONE OXIDOREDUCTASE 20 KDA SUBUNIT. | P24310; Q6FGI7                                                                                    | ; CX7A1_HUMAN; Q6FGI7_HUMAN                                                        |
| 443            | IPI00307749; IPI00419604                           | NDUFS7        | 213                                  | 298  | 256  | 2.3E+04                               | 3.3E+04 | 2.8E+04 | 15.0            | 3                     | 0         | 0         | 1        | 1         | 1 | 5-AMP-ACTIVATED PROTEIN KINASE CATALYTIC SUBUNIT ALPHA-2.                                                                                                                                                                                                                | Q7LD69; Q8NAS7 A0MZ55; P54646; Q9H1E8; Q9UD43                                                     | Q7LD69_HUMAN; Q8NAS7_HUMAN                                                         |
| 444            | IPI00307755                                        | PRKAA2        | 552                                  | 552  | 552  | 6.2E+04                               | 6.2E+04 | 6.2E+04 | 13.0            | 5                     | 1         | 1         | 1        | 1         | 1 | AMINE OXIDASE [FLAVIN-CONTAINING] B.; MONOAMINE OXIDASE B.                                                                                                                                                                                                               | P27338; Q7Z6S2; Q8TB11                                                                            | A0MZ55_HUMAN; AAPK2_HUMAN                                                          |
| 445            | IPI00328156; IPI00639878                           | MAOB          | 520                                  | 520  | 520  | 5.9E+04                               | 5.9E+04 | 5.9E+04 | 25.8            | 12                    | 1         | 1         | 1        | 1         | 1 | AMYLO-1,6-GLUCOSIDASE, 4-ALPHA-GLUCANOTRANSFERASE ISOFORM 1 VARIANT.; ISOFORM 1 OF GLYCOGEN DEBRANCHING ENZYME.                                                                                                                                                          | P78544; Q59H92; Q6AZ90; Q9UF08 Q14240; Q53XJ6; Q86W00; Q96B90; Q96EA8                             | GDE_HUMAN; Q59H92_HUMAN                                                            |
| 447            | IPI00328328; IPI00409717                           | EIF4A2        | 407                                  | 408  | 408  | 4.6E+04                               | 4.6E+04 | 4.6E+04 | 29.2            | 9                     | 1         | 1         | 1        | 1         | 1 | ISOFORM 1 OF EUKARYOTIC INITIATION FACTOR 4A-II.; ISOFORM 2 OF EUKARYOTIC INITIATION FACTOR 4A-II.                                                                                                                                                                       | Q86T04; O15257; Q5T578; Q86XC7; Q9BV59                                                            | IF4A2_HUMAN; Q53XJ6_HUMAN; Q86W00_HUMAN                                            |
| 448            | IPI00328534; IPI00658052                           | SRL           | 857                                  | 932  | 895  | 9.3E+04                               | 1.0E+05 | 9.7E+04 | 25.6            | 20                    | 1         | 1         | 1        | 1         | 1 | ISOFORM 2 OF SARCALLUMENIN PRECURSOR.; ISOFORM 1 OF SARCALLUMENIN PRECURSOR.                                                                                                                                                                                             | Q86T04; O15257; Q5T578; Q86XC7; Q9BV59                                                            | ; SRCA_HUMAN                                                                       |
| 449            | IPI00329200; IPI00783829; IPI00793443              | RANBP5        | 1097                                 | 1123 | 1112 | 1.2E+05                               | 1.3E+05 | 1.3E+05 | 12.5            | 10                    | 1         | 1         | 1        | 0         | 1 | 127 KDA PROTEIN.; IMPORTIN BETA-3.; RAN BINDING PROTEIN 5.                                                                                                                                                                                                               | Q0P6K2; Q16851; Q53Q69; Q86Y81; Q9BU15                                                            | ; IMB3_HUMAN; Q5T578_HUMAN; Q86XC7_HUMAN; Q9BV59_HUMAN                             |
| 450            | IPI00329331                                        | UGP2          | 508                                  | 508  | 508  | 5.7E+04                               | 5.7E+04 | 5.7E+04 | 51.4            | 21                    | 1         | 1         | 1        | 1         | 1 | ISOFORM 1 OF UTP--GLUCOSE-1-PHOSPHATE URIDYLTRANSFERASE 2.                                                                                                                                                                                                               | Q9H331; Q9NWX9; Q9UK56                                                                            | Q53Q69_HUMAN; UGPA2_HUMAN                                                          |
| 451            | IPI00329572; IPI00783170                           | PACSN3        | 424                                  | 425  | 425  | 4.8E+04                               | 4.9E+04 | 4.9E+04 | 24.9            | 8                     | 1         | 1         | 1        | 1         | 1 | 49 KDA PROTEIN.; PROTEIN KINASE C AND CASEIN KINASE SUBSTRATE IN NEURONS PROTEIN 3. CDNA FLJ43793 FIS, CLONE TEST14000014, HIGHLY SIMILAR TO 130 KDALEUCINE-RICH PROTEIN.; HYPOTHETICAL PROTEIN LRPPRC.; LEUCINE-RICH PPR MOTIF-CONTAINING PROTEIN.                      | A0PJE3; Q53PC0; Q53QN7; Q6ZUD8; Q7Z7A6; Q96D84                                                    | A0PJE3_HUMAN; Q53PC0_HUMAN; Q53QN7_HUMAN; Q6ZUD8_HUMAN; Q7Z7A6_HUMAN; Q96D84_HUMAN |
| 452            | IPI00329745; IPI00477140; IPI00783271              | LRPPRC        | 1278                                 | 1402 | 1358 | 1.5E+05                               | 1.6E+05 | 1.5E+05 | 20.9            | 22                    | 1         | 1         | 1        | 1         | 1 | ANNEXIN A5. PRE-B-CELL LEUKEMIA HOMEBOX INTERACTING PROTEIN 1.; PRE-B-CELL LEUKEMIA TRANSCRIPTION FACTOR INTERACTING PROTEIN 1.                                                                                                                                          | P08758; Q6FHB3; Q6F116; Q8WV69                                                                    | ANXA5_HUMAN; Q6FHB3_HUMAN                                                          |
| 454            | IPI00332106; IPI00645060                           | PBXIP1        | 702                                  | 731  | 717  | 7.8E+04                               | 8.1E+04 | 7.9E+04 | 14.6            | 8                     | 1         | 1         | 1        | 1         | 1 | Q5T176; Q96A06; Q9HA02; Q9HD85 A1L172; A1L173; P49753; Q315F8; Q315F9; Q53EK4; Q86TX2; Q9NWX4                                                                                                                                                                            | Q5T176_HUMAN; Q96A06_HUMAN; Q9HA02_HUMAN; Q9HD85_HUMAN                                            |                                                                                    |
| 455            | IPI00220906; IPI00333838                           | ACOT1; ACOT2  | 421                                  | 483  | 452  | 4.6E+04                               | 5.3E+04 | 5.0E+04 | 40.1            | 11                    | 1         | 1         | 1        | 1         | 1 | ISOFORM 1 OF ACYL-COENZYME A THIOESTERASE 2.; ACYL-COENZYME A THIOESTERASE 1.                                                                                                                                                                                            | P08238; Q5T9W7; Q6PK50; Q9H6X9; Q9NQW0; Q9NTK6                                                    | ; HS90B_HUMAN; Q6PK50_HUMAN; Q9H6X9_HUMAN                                          |
| 456            | IPI00334775; IPI00414676                           | HSP90AB1      | 724                                  | 736  | 730  | 8.3E+04                               | 8.5E+04 | 8.4E+04 | 42.4            | 27                    | 1         | 1         | 1        | 1         | 1 | 85 KDA PROTEIN.; HEAT SHOCK PROTEIN HSP 90-BETA.                                                                                                                                                                                                                         | Q13423; Q16796; Q2TB59; Q2TB60; Q8N3V4; Q8N5H5                                                    | Q9H6X9_HUMAN                                                                       |
| 457            | IPI00337541                                        | NNT           | 1086                                 | 1086 | 1086 | 1.1E+05                               | 1.1E+05 | 1.1E+05 | 13.5            | 11                    | 1         | 1         | 1        | 1         | 1 | NAD(P) TRANSHYDROGENASE, MITOCHONDRIAL PRECURSOR.                                                                                                                                                                                                                        | P13798; Q9BQ33; Q9P0Y2                                                                            | NNTM_HUMAN; Q2TB59_HUMAN; Q8N5H5_HUMAN                                             |
| 458            | IPI00337741                                        | APEH          | 732                                  | 732  | 732  | 8.1E+04                               | 8.1E+04 | 8.1E+04 | 16.3            | 8                     | 1         | 1         | 1        | 1         | 1 | ACYLAMINO-ACID-RELEASING ENZYME.                                                                                                                                                                                                                                         |                                                                                                   | ACPH_HUMAN                                                                         |
| 459            | IPI00374208                                        | CAND2         | 1119                                 | 1119 | 1119 | 1.2E+05                               | 1.2E+05 | 1.2E+05 | 13.3            | 10                    | 1         | 1         | 1        | 1         | 1 | CULLIN-ASSOCIATED NEDD8-DISSOCIATED PROTEIN 2. VESICLE-ASSOCIATED MEMBRANE PROTEIN-ASSOCIATED PROTEIN A ISOFORM 1.                                                                                                                                                       | Q75155                                                                                            | CAND2_HUMAN                                                                        |
| 460            | IPI00374657                                        | VAPA          | 294                                  | 294  | 294  | 3.3E+04                               | 3.3E+04 | 3.3E+04 | 15.3            | 5                     | 0         | 0         | 1        | 1         | 1 | ISOFORM 2 OF EUKARYOTIC TRANSLATION INITIATION FACTOR 5A-1.; ISOFORM 1 OF EUKARYOTIC TRANSLATION INITIATION FACTOR 5A-1.                                                                                                                                                 | P10159; P63241; Q16182; Q7L7L3; Q7Z4L1; Q9D0G2                                                    | IF5A1_HUMAN                                                                        |
| 461            | IPI00376005; IPI00411704                           | EIF5A         | 154                                  | 184  | 169  | 1.7E+04                               | 2.0E+04 | 1.9E+04 | 25.5            | 3                     | 1         | 0         | 1        | 1         | 1 | SIMILAR TO SMOOTHELIN-LIKE 1.                                                                                                                                                                                                                                            | Q7RTR3; Q86UT6; Q86D51; Q9H724                                                                    | Q7RTR3_HUMAN; Q86UT6_HUMAN; Q96D51_HUMAN; Q9H724_HUMAN                             |
| 462            | IPI00377167                                        | SMTNL1        | 512                                  | 512  | 512  | 5.5E+04                               | 5.5E+04 | 5.5E+04 | 18.0            | 5                     | 1         | 1         | 1        | 1         | 1 | NLR FAMILY MEMBER X1 ISOFORM 2.; NLR FAMILY MEMBER X1 ISOFORM 1.                                                                                                                                                                                                         | Q7RTR3; Q86UT6; Q86D51; Q9H724                                                                    | Q7RTR3_HUMAN; Q86UT6_HUMAN; Q96D51_HUMAN; Q9H724_HUMAN                             |
| 463            | IPI00377214; IPI00465264                           | NLRX1         | 921                                  | 975  | 948  | 1.0E+05                               | 1.1E+05 | 1.0E+05 | 3.9             | 3                     | 0         | 1         | 1        | 1         | 1 | Q2VPJ6; Q5CAQ6; Q5CAQ7; Q86SX1; Q8TBA7; Q96HX7; Q9BV05                                                                                                                                                                                                                   | ; HS90A_HUMAN; Q2VPJ6_HUMAN; Q5CAQ6_HUMAN; Q5CAQ7_HUMAN; Q86SX1_HUMAN; Q8TBA7_HUMAN; Q96HX7_HUMAN |                                                                                    |
| 464            | IPI00382470; IPI00784295; IPI00789847              | HSP90AA1      | 732                                  | 854  | 790  | 8.5E+04                               | 9.8E+04 | 9.1E+04 | 33.0            | 26                    | 1         | 1         | 1        | 1         | 1 | HEAT SHOCK PROTEIN HSP 90-ALPHA.2.; HEAT SHOCK PROTEIN HSP 90-ALPHA.; PROTEIN.                                                                                                                                                                                           | Q5VU58; Q8TCG3; Q8TED6; Q96DG6                                                                    | Q5VU58_HUMAN; Q8TCG3_HUMAN; Q8TED6_HUMAN; Q96DG6_HUMAN                             |
| 465            | IPI00382894                                        | TPM3          | 248                                  | 248  | 248  | 2.9E+04                               | 2.9E+04 | 2.9E+04 | 66.5            | 22                    | 0         | 0         | 1        | 1         | 1 | TROPOMYOSIN 3.                                                                                                                                                                                                                                                           |                                                                                                   |                                                                                    |
| 466            | IPI00383046                                        | CMBL          | 245                                  | 245  | 245  | 2.8E+04                               | 2.8E+04 | 2.8E+04 | 22.4            | 7                     | 0         | 0         | 1        | 1         | 1 | CARBOXYMETHYLENEBUTENOLIDASE-LIKE. ISOFORM 2 OF NEUTRAL ALPHA-GLUCOSIDASE AB PRECURSOR.; ISOFORM 1 OF NEUTRAL ALPHA-GLUCOSIDASE AB PRECURSOR.; ISOFORM 3 OF NEUTRAL ALPHA-GLUCOSIDASE AB PRECURSOR.; 107 KDA PROTEIN.                                                    | Q14697; Q8WTS9; Q9P0X0                                                                            | ; GANAB_HUMAN                                                                      |
| 467            | IPI00011454; IPI00383581; IPI00441414; IPI00472068 | GANAB         | 847                                  | 966  | 925  | 9.6E+04                               | 1.1E+05 | 1.0E+05 | 9.4             | 5                     | 1         | 1         | 1        | 1         | 1 | Q94982; Q53ST0; Q584P1; Q8N4N5; Q96QM8; Q9UHG3                                                                                                                                                                                                                           | ; GANAB_HUMAN                                                                                     |                                                                                    |
| 468            | IPI00384280                                        | PCYOX1        | 505                                  | 505  | 505  | 5.7E+04                               | 5.7E+04 | 5.7E+04 | 28.7            | 10                    | 1         | 1         | 1        | 1         | 1 | PRENYLCYSTEINE OXIDASE PRECURSOR.                                                                                                                                                                                                                                        |                                                                                                   | PCYOX_HUMAN; Q53ST0_HUMAN; Q584P1_HUMAN                                            |



| Protein Group <sup>a</sup> | IPI ID                                                                                                                                                                                                                                                | IPI gene name              | Amino Acids in Sequence <sup>b</sup> |      |      | Protein Molecular Weight <sup>c</sup> |         |         | Seq. Cov. (max) | Unique Peptides (max) | Detection |           |          |           | Protein name                                                                                                                                                                                                                                                                                                                                                              | Uniprot Id                                                                                                                                                                                                                                                                           | Uniprot Entry Name                                                                                                                                                                                                                                                                                                            |
|----------------------------|-------------------------------------------------------------------------------------------------------------------------------------------------------------------------------------------------------------------------------------------------------|----------------------------|--------------------------------------|------|------|---------------------------------------|---------|---------|-----------------|-----------------------|-----------|-----------|----------|-----------|---------------------------------------------------------------------------------------------------------------------------------------------------------------------------------------------------------------------------------------------------------------------------------------------------------------------------------------------------------------------------|--------------------------------------------------------------------------------------------------------------------------------------------------------------------------------------------------------------------------------------------------------------------------------------|-------------------------------------------------------------------------------------------------------------------------------------------------------------------------------------------------------------------------------------------------------------------------------------------------------------------------------|
|                            |                                                                                                                                                                                                                                                       |                            | Min.                                 | Max. | Mean | Min.                                  | Max.    | Mean    |                 |                       | Expt. I-1 | Expt. I-2 | Expt. II | Expt. III |                                                                                                                                                                                                                                                                                                                                                                           |                                                                                                                                                                                                                                                                                      |                                                                                                                                                                                                                                                                                                                               |
| 489                        | IPI00418169; IPI00455315                                                                                                                                                                                                                              | ANXA2                      | 339                                  | 357  | 348  | 3.9E+04                               | 4.0E+04 | 4.0E+04 | 47.9            | 15                    | 1         | 1         | 1        | 1         | ANNEXIN A2 ISOFORM 1.; ANNEXIN A2.                                                                                                                                                                                                                                                                                                                                        | P07355; Q567R4; Q6N0B3; Q8TBV2; Q8SD05; Q3B778; Q5T456; Q70E29; Q8WUD7; Q96MG0; Q9GZV1 P08670; Q15867; Q15868; Q15869; Q53HU8; Q548L2; Q6LER9; Q8N850; Q8N9S6; Q96ML2; Q9NTM3                                                                                                        | ANXA2_HUMAN; Q6N0B3_HUMAN; Q8TBV2_HUMAN                                                                                                                                                                                                                                                                                       |
| 490                        | IPI00418217; IPI00797844                                                                                                                                                                                                                              | ANKRD2                     | 333                                  | 360  | 347  | 3.7E+04                               | 4.0E+04 | 3.8E+04 | 49.3            | 11                    | 1         | 1         | 1        | 1         | ISOFORM 1 OF ANKYRIN REPEAT DOMAIN-CONTAINING PROTEIN 2.; ANKYRIN REPEAT DOMAIN 2.                                                                                                                                                                                                                                                                                        | Q96MG0; Q9GZV1 P08670; Q15867; Q15868; Q15869; Q53HU8; Q548L2; Q6LER9; Q8N850; Q8N9S6; Q96ML2; Q9NTM3                                                                                                                                                                                | ANKR2_HUMAN; Q3B778_HUMAN; Q70E29_HUMAN; Q96MG0_HUMAN                                                                                                                                                                                                                                                                         |
| 491                        | IPI00418471; IPI00827679                                                                                                                                                                                                                              | VIM                        | 431                                  | 466  | 449  | 5.0E+04                               | 5.4E+04 | 5.2E+04 | 42.3            | 18                    | 1         | 1         | 1        | 1         | VIMENTIN.; 50 KDA PROTEIN.                                                                                                                                                                                                                                                                                                                                                | A2A2W2; Q75834; Q13619; Q589T6; Q5TC62; Q6UP08; Q9UP17                                                                                                                                                                                                                               | Q53HU8_HUMAN; Q548L2_HUMAN; Q8N9S6_HUMAN; VIME_HUMAN                                                                                                                                                                                                                                                                          |
| 492                        | IPI00419273; IPI00549919                                                                                                                                                                                                                              | CUL4A                      | 659                                  | 763  | 711  | 7.7E+04                               | 8.8E+04 | 8.3E+04 | 3.5             | 2                     | 0         | 0         | 1        | 0         | ISOFORM 1 OF CULLIN-4A.; ISOFORM 2 OF CULLIN-4A. ALPHA ISOFORM OF REGULATORY SUBUNIT A. PROTEIN PHOSPHATASE 2.; SERINE/THREONINE-PROTEIN PHOSPHATASE 2A 65 KDA REGULATORY SUBUNIT AALPHA ISOFORM.                                                                                                                                                                         | P30153; Q13773; Q6IC03; Q96DH3 A0A5E5; Q0KKI6; Q502W4; Q5FEF6; Q6GMV9; Q6GMW0; Q6GMW1; Q6GMX0; Q6GMX8; Q6GMX9; Q6P491; Q6P5R5; Q6P5S8; Q6PIH4; Q6PIH6; Q6PIH7; Q6PIT5; Q6PJF2; Q7Z3Y4; Q7Z473; Q8NEK0; Q8TCD0 P05092; P62937; Q3K0V3; Q6IBU5; Q71V99; Q96IX3; Q9BRU4; Q9BTY9; Q9UC61 | A2A2W2_HUMAN; CUL4A_HUMAN                                                                                                                                                                                                                                                                                                     |
| 493                        | IPI00419307; IPI00554737                                                                                                                                                                                                                              | PPP2R1A                    | 589                                  | 589  | 589  | 6.5E+04                               | 6.5E+04 | 6.5E+04 | 22.8            | 9                     | 1         | 1         | 1        | 1         | IGKV1-5 PROTEIN.; IGKC PROTEIN.; IGKV1-5 PROTEIN.; IGKC PROTEIN.; IGKV2-24 PROTEIN.; IGKC PROTEIN.; IGKV1-5 PROTEIN.; HYPOTHETICAL PROTEIN.; ANTI-RHO MONOCLONAL T125 KAPPA LIGHT CHAIN PRECURSOR.; IGKC PROTEIN.; IGKC PROTEIN.; IGKC PROTEIN.; HYPOTHETICAL PROTEIN.; HYPOTHETICAL PROTEIN.; HYPOTHETICAL PROTEIN.; HYPOTHETICAL PROTEIN.; IGKC PROTEIN.; IGKC PROTEIN. | P30153; Q13773; Q6IC03; Q96DH3 A0A5E5; Q0KKI6; Q502W4; Q5FEF6; Q6GMV9; Q6GMW0; Q6GMW1; Q6GMX0; Q6GMX8; Q6GMX9; Q6P491; Q6P5R5; Q6P5S8; Q6PIH4; Q6PIH6; Q6PIH7; Q6PIT5; Q6PJF2; Q7Z3Y4; Q7Z473; Q8NEK0; Q8TCD0 P05092; P62937; Q3K0V3; Q6IBU5; Q71V99; Q96IX3; Q9BRU4; Q9BTY9; Q9UC61 | 2AAA_HUMAN A0A5E5_HUMAN; Q0KKI6_HUMAN; Q502W4_HUMAN; Q5FEF6_HUMAN; Q6GMV9_HUMAN; Q6GMW0_HUMAN; Q6GMW1_HUMAN; Q6GMX0_HUMAN; Q6GMX8_HUMAN; Q6GMX9_HUMAN; Q6P491_HUMAN; Q6P5R5_HUMAN; Q6P5S8_HUMAN; Q6PIH4_HUMAN; Q6PIH6_HUMAN; Q6PIH7_HUMAN; Q6PIT5_HUMAN; Q6PJF2_HUMAN; Q7Z3Y4_HUMAN; Q7Z473_HUMAN; Q8NEK0_HUMAN; Q8TCD0_HUMAN |
| 494                        | IPI00419424; IPI00430808; IPI00430820; IPI00430847; IPI00440577; IPI00472961; IPI00478600; IPI00550731; IPI00554675; IPI00746963; IPI00761125; IPI00784070; IPI00784661; IPI00784773; IPI00784865; IPI00784985; IPI00807459; IPI00816118; IPI00827488 | IGKC; IGKV1-5              | 234                                  | 294  | 239  | 2.6E+04                               | 3.2E+04 | 2.6E+04 | 27.1            | 4                     | 0         | 1         | 1        | 1         | PEPTIDYL-PROLYL CIS-TRANS ISOMERASE A.                                                                                                                                                                                                                                                                                                                                    | Q9UC61 Q5V97; Q6ZVZ7; Q9BRF2                                                                                                                                                                                                                                                         | PP1A_HUMAN; Q71V99_HUMAN Q5V97_HUMAN; Q6ZVZ7_HUMAN; Q9BRF2_HUMAN                                                                                                                                                                                                                                                              |
| 495                        | IPI00419585                                                                                                                                                                                                                                           | LOC653214; LOC654188; PPIA | 165                                  | 165  | 165  | 1.8E+04                               | 1.8E+04 | 1.8E+04 | 27.3            | 5                     | 1         | 0         | 1        | 1         | DIHYDROLIPOYLLYSINE-RESIDUE SUCCINYLTRANSFERASE COMPONENT OF 2-OXOGLUTARATE DEHYDROGENASE COMPLEX, MITOCHONDRIAL PRECURSOR.                                                                                                                                                                                                                                               | P36957; Q6IBS5; Q7LDY7; Q9BQ32 Q9BFK0; Q9NV53; Q9Y3A5                                                                                                                                                                                                                                | ODO2_HUMAN; Q6IBS5_HUMAN; Q7LDY7_HUMAN                                                                                                                                                                                                                                                                                        |
| 496                        | IPI00420049; IPI00739670                                                                                                                                                                                                                              | C1orf170                   | 696                                  | 696  | 696  | 7.2E+04                               | 7.2E+04 | 7.2E+04 | 13.7            | 5                     | 1         | 1         | 1        | 1         | SHWACHMAN-BODIAN-DIAMOND SYNDROME PROTEIN.                                                                                                                                                                                                                                                                                                                                | Q14BD6; Q6H969; Q6ZUJ0; Q9NZL8 P25705; Q53XX6; Q8IXV2; Q96FB4; Q96HW2; Q96IR6; Q9BTV8                                                                                                                                                                                                | SBDS_HUMAN Q14BD6_HUMAN; Q6H969_HUMAN; Q6ZUJ0_HUMAN; Q9NZL8_HUMAN                                                                                                                                                                                                                                                             |
| 497                        | IPI00420108                                                                                                                                                                                                                                           | DLST                       | 453                                  | 453  | 453  | 4.9E+04                               | 4.9E+04 | 4.9E+04 | 24.7            | 11                    | 1         | 1         | 1        | 1         | ATP SYNTHASE SUBUNIT ALPHA, MITOCHONDRIAL PRECURSOR.                                                                                                                                                                                                                                                                                                                      | A2A2C2; A2A2C3; Q6FIC7; Q6P587; Q96RY1; Q9H0N6 Q7Z4W1; Q9BTZ3; Q9UHY9                                                                                                                                                                                                                | ATPA_HUMAN; Q53XX6_HUMAN                                                                                                                                                                                                                                                                                                      |
| 498                        | IPI00427330                                                                                                                                                                                                                                           | SBDS                       | 250                                  | 250  | 250  | 2.9E+04                               | 2.9E+04 | 2.9E+04 | 11.6            | 3                     | 0         | 0         | 1        | 0         | FUMARYLACETOACETATE HYDROLASE DOMAIN-CONTAINING PROTEIN1.; FUMARYLACETOACETATE HYDROLASE DOMAIN CONTAINING 1. L-XYLULOSE REDUCTASE.; 26 KDA PROTEIN.; 26 KDA PROTEIN.                                                                                                                                                                                                     | P19237; Q659A5; Q6FGS7; Q6FGW1; Q6ICU2; Q86T57; Q96DT9                                                                                                                                                                                                                               | A2A2C2_HUMAN; A2A2C3_HUMAN; FAHD1_HUMAN                                                                                                                                                                                                                                                                                       |
| 499                        | IPI00434580; IPI00479390                                                                                                                                                                                                                              | MYOM1                      | 1589                                 | 1685 | 1637 | 1.8E+05                               | 1.9E+05 | 1.8E+05 | 34.2            | 45                    | 1         | 1         | 1        | 1         | TROPONIN I, SLOW SKELETAL MUSCLE.; 22 KDA PROTEIN.                                                                                                                                                                                                                                                                                                                        | Q5HYH7; Q5HYK6; Q5V7F3; Q76L25; Q86T52; Q8N3L3; Q8N3S2                                                                                                                                                                                                                               | DCXR_HUMAN Q659A5_HUMAN; Q6FGS7_HUMAN; Q6ICU2_HUMAN; Q86T57_HUMAN; Q96DT9_HUMAN; TNN1_HUMAN                                                                                                                                                                                                                                   |
| 500                        | IPI00440493                                                                                                                                                                                                                                           | ATP5A1                     | 553                                  | 553  | 553  | 6.0E+04                               | 6.0E+04 | 6.0E+04 | 62.0            | 39                    | 1         | 1         | 1        | 1         | BETA-TAXILIN. ISOFORM 1 OF UBIQUINONE BIOSYNTHESIS METHYLTRANSFERASE COQ5.MITOCHONDRIAL PRECURSOR.                                                                                                                                                                                                                                                                        | Q6IS07; Q8WWW0; Q96AG5 P17661; Q15787; Q45VM6; Q45VM7; Q45VM8; Q53SB5; Q549R7; Q549R8; Q549R9; Q8IZR1; Q8IZR6; Q8NES2; Q8NEU6; Q8TAC4; Q8TCX2; Q8TD99; Q9H319; Q9UHN5; Q9UJ80                                                                                                        | Q53HE2_HUMAN; Q6FHP9_HUMAN; TPIS_HUMAN                                                                                                                                                                                                                                                                                        |
| 501                        | IPI00440828; IPI00552360; IPI00604759                                                                                                                                                                                                                 | FAHD1                      | 224                                  | 248  | 233  | 2.5E+04                               | 2.7E+04 | 2.6E+04 | 13.3            | 2                     | 0         | 0         | 1        | 0         | TRIOSEPHOSPHATE ISOMERASE 1 VARIANT.; ISOFORM 1 OF TRIOSEPHOSPHATE ISOMERASE.                                                                                                                                                                                                                                                                                             | Q6IS07; Q8WWW0; Q96AG5 P17661; Q15787; Q45VM6; Q45VM7; Q45VM8; Q53SB5; Q549R7; Q549R8; Q549R9; Q8IZR1; Q8IZR6; Q8NES2; Q8NEU6; Q8TAC4; Q8TCX2; Q8TD99; Q9H319; Q9UHN5; Q9UJ80                                                                                                        | A2A2C2_HUMAN; A2A2C3_HUMAN; FAHD1_HUMAN                                                                                                                                                                                                                                                                                       |
| 502                        | IPI00448095; IPI00797249; IPI00797917                                                                                                                                                                                                                 | DCXR                       | 242                                  | 244  | 243  | 2.6E+04                               | 2.6E+04 | 2.6E+04 | 16.4            | 4                     | 0         | 0         | 1        | 1         | DCXR_HUMAN                                                                                                                                                                                                                                                                                                                                                                | Q659A5_HUMAN; Q6FGS7_HUMAN; Q6ICU2_HUMAN; Q86T57_HUMAN; Q96DT9_HUMAN; TNN1_HUMAN                                                                                                                                                                                                     |                                                                                                                                                                                                                                                                                                                               |
| 503                        | IPI00453474; IPI00473081                                                                                                                                                                                                                              | TNNI1                      | 187                                  | 187  | 187  | 2.2E+04                               | 2.2E+04 | 2.2E+04 | 21.4            | 7                     | 0         | 0         | 1        | 1         | BETA-TAXILIN. ISOFORM 1 OF UBIQUINONE BIOSYNTHESIS METHYLTRANSFERASE COQ5.MITOCHONDRIAL PRECURSOR.                                                                                                                                                                                                                                                                        | Q6IS07; Q8WWW0; Q96AG5 P17661; Q15787; Q45VM6; Q45VM7; Q45VM8; Q53SB5; Q549R7; Q549R8; Q549R9; Q8IZR1; Q8IZR6; Q8NES2; Q8NEU6; Q8TAC4; Q8TCX2; Q8TD99; Q9H319; Q9UHN5; Q9UJ80                                                                                                        | DCXR_HUMAN Q659A5_HUMAN; Q6FGS7_HUMAN; Q6ICU2_HUMAN; Q86T57_HUMAN; Q96DT9_HUMAN; TNN1_HUMAN                                                                                                                                                                                                                                   |
| 504                        | IPI00456626                                                                                                                                                                                                                                           | TXLNB                      | 684                                  | 684  | 684  | 7.7E+04                               | 7.7E+04 | 7.7E+04 | 16.2            | 8                     | 1         | 1         | 1        | 1         | DCXR_HUMAN                                                                                                                                                                                                                                                                                                                                                                | Q659A5_HUMAN; Q6FGS7_HUMAN; Q6ICU2_HUMAN; Q86T57_HUMAN; Q96DT9_HUMAN; TNN1_HUMAN                                                                                                                                                                                                     |                                                                                                                                                                                                                                                                                                                               |
| 505                        | IPI00456965                                                                                                                                                                                                                                           | COQ5                       | 327                                  | 327  | 327  | 3.7E+04                               | 3.7E+04 | 3.7E+04 | 17.7            | 5                     | 0         | 0         | 1        | 1         | DCXR_HUMAN                                                                                                                                                                                                                                                                                                                                                                | Q659A5_HUMAN; Q6FGS7_HUMAN; Q6ICU2_HUMAN; Q86T57_HUMAN; Q96DT9_HUMAN; TNN1_HUMAN                                                                                                                                                                                                     |                                                                                                                                                                                                                                                                                                                               |
| 506                        | IPI00465028; IPI00797687                                                                                                                                                                                                                              | TP11                       | 249                                  | 286  | 268  | 2.7E+04                               | 3.1E+04 | 2.9E+04 | 44.2            | 12                    | 1         | 1         | 1        | 1         | DCXR_HUMAN                                                                                                                                                                                                                                                                                                                                                                | Q659A5_HUMAN; Q6FGS7_HUMAN; Q6ICU2_HUMAN; Q86T57_HUMAN; Q96DT9_HUMAN; TNN1_HUMAN                                                                                                                                                                                                     |                                                                                                                                                                                                                                                                                                                               |
| 507                        | IPI00465084; IPI00658057; IPI00793833                                                                                                                                                                                                                 | DES                        | 402                                  | 470  | 447  | 4.7E+04                               | 5.4E+04 | 5.1E+04 | 50.6            | 20                    | 1         | 1         | 1        | 1         | DCXR_HUMAN                                                                                                                                                                                                                                                                                                                                                                | Q659A5_HUMAN; Q6FGS7_HUMAN; Q6ICU2_HUMAN; Q86T57_HUMAN; Q96DT9_HUMAN; TNN1_HUMAN                                                                                                                                                                                                     |                                                                                                                                                                                                                                                                                                                               |

| Protein Group* | IPI ID                                                                                                              | IPI gene name | Amino Acids in Sequence <sup>1</sup> |      |      | Protein Molecular Weight <sup>1</sup> |         |         | Seq. Cov. (max) | Unique Peptides (max) | Detection |           |          |           | Protein name                                                                                                                                                                                      | Uniprot Id                                                                                                                                                                                                                                                                                                                                                                                                                             | Uniprot Entry Name                                                                                                                                                                                                                                                                                                                                                                     |
|----------------|---------------------------------------------------------------------------------------------------------------------|---------------|--------------------------------------|------|------|---------------------------------------|---------|---------|-----------------|-----------------------|-----------|-----------|----------|-----------|---------------------------------------------------------------------------------------------------------------------------------------------------------------------------------------------------|----------------------------------------------------------------------------------------------------------------------------------------------------------------------------------------------------------------------------------------------------------------------------------------------------------------------------------------------------------------------------------------------------------------------------------------|----------------------------------------------------------------------------------------------------------------------------------------------------------------------------------------------------------------------------------------------------------------------------------------------------------------------------------------------------------------------------------------|
|                |                                                                                                                     |               | Min.                                 | Max. | Mean | Min.                                  | Max.    | Mean    |                 |                       | Expt. I-1 | Expt. I-2 | Expt. II | Expt. III |                                                                                                                                                                                                   |                                                                                                                                                                                                                                                                                                                                                                                                                                        |                                                                                                                                                                                                                                                                                                                                                                                        |
| 508            | IPI00465179; IPI00743142                                                                                            | PFKM          | 780                                  | 851  | 816  | 8.5E+04                               | 9.3E+04 | 8.9E+04 | 38.7            | 36                    | 1         | 1         | 1        | 1         | CDNA FLJ44241 FIS, CLONE THYMU3008436, HIGHLY SIMILAR TO 6-PHOSPHOFRUCTOKINASE, MUSCLE TYPE.; ISOFORM 1 OF 6-PHOSPHOFRUCTOKINASE, MUSCLE TYPE.                                                    | P08237; Q16814; Q16815; Q62T71 P06733; P22712; Q16704; Q4TUS4; Q53FT9; Q53HR3; Q658M5; Q6GMP2; Q71V37; Q7Z3V6; Q8WU71; Q96GV1; Q9BT62; Q9UCG5; Q9UCH6; Q9UM55 Q51YV6; Q7Z4Y4; Q7Z531; Q9H576; Q9NPB4; Q9UJ7 P00001; P99999; Q6LER6; Q6NUR2; Q6NX69; Q96BV4 P04040; Q2M1U4; Q4VXX5; Q8TAK2; Q9BWT9; Q9UC85 P04075; Q6FH76; Q6F110; Q96B15; Q9BWD9; Q9UCN2 Q14800; P02590; P04463; P63316; Q6FH91 Q95026; Q9UD81; Q9UDL7; Q9UDU5; Q9UIU0 | K6PF_HUMAN; Q6ZTT1_HUMAN<br>ENOA_HUMAN; Q53FT9_HUMAN; Q53HR3_HUMAN; Q96GV1_HUMAN; Q9BT62_HUMAN; Q9UCG5_HUMAN; Q9UCH6_HUMAN<br>KAD3_HUMAN; Q7Z4Y4_HUMAN; Q7Z531_HUMAN<br>CYC_HUMAN; Q6LER6_HUMAN<br>CATA_HUMAN; Q8TAK2_HUMAN; Q9UC85_HUMAN<br>ALDOA_HUMAN; Q6F110_HUMAN; Q9UCN2_HUMAN<br>Q6FH91_HUMAN; TNNC1_HUMAN Q95026_HUMAN; Q9UD81_HUMAN; Q9UDL7_HUMAN; Q9UDU5_HUMAN; Q9UIU0_HUMAN |
| 509            | IPI00465248                                                                                                         | ENO1          | 434                                  | 434  | 434  | 4.7E+04                               | 4.7E+04 | 4.7E+04 | 49.8            | 19                    | 1         | 1         | 1        | 1         | ISOFORM ALPHA-ENOLASE OF ALPHA-ENOLASE.                                                                                                                                                           |                                                                                                                                                                                                                                                                                                                                                                                                                                        |                                                                                                                                                                                                                                                                                                                                                                                        |
| 510            | IPI00465256                                                                                                         | AK3           | 227                                  | 227  | 227  | 2.6E+04                               | 2.6E+04 | 2.6E+04 | 41.9            | 9                     | 0         | 0         | 1        | 1         | GTP:AMP PHOSPHOTRANSFERASE MITOCHONDRIAL.                                                                                                                                                         |                                                                                                                                                                                                                                                                                                                                                                                                                                        |                                                                                                                                                                                                                                                                                                                                                                                        |
| 511            | IPI00465315                                                                                                         | CYCS          | 105                                  | 105  | 105  | 1.2E+04                               | 1.2E+04 | 1.2E+04 | 49.5            | 6                     | 1         | 0         | 1        | 1         | CYTOCHROME C.                                                                                                                                                                                     |                                                                                                                                                                                                                                                                                                                                                                                                                                        | CYC_HUMAN; Q6LER6_HUMAN                                                                                                                                                                                                                                                                                                                                                                |
| 512            | IPI00465436                                                                                                         | CAT           | 527                                  | 527  | 527  | 6.0E+04                               | 6.0E+04 | 6.0E+04 | 44.4            | 20                    | 1         | 1         | 1        | 1         | CATALASE.                                                                                                                                                                                         |                                                                                                                                                                                                                                                                                                                                                                                                                                        | CATA_HUMAN; Q8TAK2_HUMAN; Q9UC85_HUMAN                                                                                                                                                                                                                                                                                                                                                 |
| 513            | IPI00465439                                                                                                         | ALDOA         | 364                                  | 364  | 364  | 3.9E+04                               | 3.9E+04 | 3.9E+04 | 70.9            | 38                    | 1         | 1         | 1        | 1         | FRUCTOSE-BISPHOSPHATE ALDOLASE A.                                                                                                                                                                 |                                                                                                                                                                                                                                                                                                                                                                                                                                        | ALDOA_HUMAN; Q6F110_HUMAN; Q9UCN2_HUMAN                                                                                                                                                                                                                                                                                                                                                |
| 514            | IPI00470359                                                                                                         | TNNC1         | 161                                  | 161  | 161  | 1.8E+04                               | 1.8E+04 | 1.8E+04 | 46.0            | 7                     | 1         | 1         | 1        | 1         | TROPONIN C, SLOW SKELETAL AND CARDIAC MUSCLES.                                                                                                                                                    |                                                                                                                                                                                                                                                                                                                                                                                                                                        | Q6FH91_HUMAN; TNNC1_HUMAN Q95026_HUMAN; Q9UD81_HUMAN; Q9UDL7_HUMAN; Q9UDU5_HUMAN; Q9UIU0_HUMAN                                                                                                                                                                                                                                                                                         |
| 515            | IPI00470535                                                                                                         | CACNA2D1      | 1110                                 | 1110 | 1110 | 1.3E+05                               | 1.3E+05 | 1.3E+05 | 12.6            | 10                    | 1         | 1         | 1        | 1         | DIHYDROPYRIDINE RECEPTOR ALPHA 2 SUBUNIT.                                                                                                                                                         |                                                                                                                                                                                                                                                                                                                                                                                                                                        |                                                                                                                                                                                                                                                                                                                                                                                        |
| 516            | IPI00470631; IPI00746245                                                                                            | COQ9          | 318                                  | 324  | 321  | 3.6E+04                               | 3.6E+04 | 3.6E+04 | 23.6            | 4                     | 1         | 1         | 1        | 1         | ISOFORM 1 OF UBIQUINONE BIOSYNTHESIS PROTEIN COQ9, MITOCHONDRIAL PRECURSOR.; 36 KDA PROTEIN.                                                                                                      |                                                                                                                                                                                                                                                                                                                                                                                                                                        | ; COQ9_HUMAN A0PK21_HUMAN; Q95329_HUMAN; Q53F73_HUMAN; Q8NCL5_HUMAN; Q9UHJ1_HUMAN; Q9UHQ9_HUMAN                                                                                                                                                                                                                                                                                        |
| 517            | IPI00470674                                                                                                         | CYB5R1        | 305                                  | 305  | 305  | 3.4E+04                               | 3.4E+04 | 3.4E+04 | 41.6            | 12                    | 1         | 1         | 1        | 1         | NAD(P)H:QUINONE OXIDOREDUCTASE TYPE 3, POLYPEPTIDE A2.                                                                                                                                            |                                                                                                                                                                                                                                                                                                                                                                                                                                        | Q9UHJ1_HUMAN; Q9UHQ9_HUMAN                                                                                                                                                                                                                                                                                                                                                             |
| 518            | IPI00470829                                                                                                         | IMMT          | 726                                  | 726  | 726  | 8.0E+04                               | 8.0E+04 | 8.0E+04 | 33.5            | 21                    | 1         | 0         | 1        | 0         | ISOFORM 3 OF MITOCHONDRIAL INNER MEMBRANE PROTEIN.                                                                                                                                                |                                                                                                                                                                                                                                                                                                                                                                                                                                        | IMMT_HUMAN                                                                                                                                                                                                                                                                                                                                                                             |
| 519            | IPI00472102; IPI00784154                                                                                            | HSPD1         | 573                                  | 575  | 574  | 6.1E+04                               | 6.1E+04 | 6.1E+04 | 57.4            | 25                    | 1         | 1         | 1        | 1         | 61 KDA PROTEIN.; 60 KDA HEAT SHOCK PROTEIN, MITOCHONDRIAL PRECURSOR.                                                                                                                              |                                                                                                                                                                                                                                                                                                                                                                                                                                        | ; CH60_HUMAN; Q53QD5_HUMAN                                                                                                                                                                                                                                                                                                                                                             |
| 520            | IPI00472442                                                                                                         | PSMA1         | 269                                  | 269  | 269  | 3.0E+04                               | 3.0E+04 | 3.0E+04 | 21.6            | 5                     | 0         | 0         | 1        | 0         | ISOFORM LONG OF PROTEASOME SUBUNIT ALPHA TYPE 1.                                                                                                                                                  |                                                                                                                                                                                                                                                                                                                                                                                                                                        | PSA1_HUMAN; Q53YE8_HUMAN                                                                                                                                                                                                                                                                                                                                                               |
| 521            | IPI00473011                                                                                                         | HBB; HBD      | 147                                  | 147  | 147  | 1.6E+04                               | 1.6E+04 | 1.6E+04 | 75.5            | 13                    | 1         | 1         | 1        | 1         | HEMOGLOBIN SUBUNIT DELTA.                                                                                                                                                                         |                                                                                                                                                                                                                                                                                                                                                                                                                                        | A0N071_HUMAN; HBD_HUMAN A2J1N3_HUMAN; Q5FWG0_HUMAN; Q6GMX5_HUMAN; Q6GMY2_HUMAN; Q86TT1_HUMAN; Q8WUK1_HUMAN; Q8WUX4_HUMAN; Q96AA6_HUMAN; Q96B99_HUMAN; Q96EY0_HUMAN; Q9BQ88_HUMAN; Q9BU10_HUMAN; SYPL2_HUMAN                                                                                                                                                                            |
| 522            | IPI00477090; IPI00479708; IPI00549291; IPI00828205; IPI00829729; IPI00829768; IPI00829843; IPI00829854; IPI00829911 | IGHM SYPL2    | 595                                  | 625  | 605  | 6.5E+04                               | 6.9E+04 | 6.6E+04 | 15.4            | 7                     | 1         | 1         | 1        | 1         | IGHM PROTEIN.; IGHM PROTEIN.                                                                            |                                                                                                                                                                                                                                                                                                                                                                                                                                        | Q8WUX4_HUMAN; Q96AA6_HUMAN; Q96B99_HUMAN; Q96EY0_HUMAN; Q9BQ88_HUMAN; Q9BU10_HUMAN; SYPL2_HUMAN                                                                                                                                                                                                                                                                                        |
| 523            | IPI00477131                                                                                                         | IGHM SYPL2    | 272                                  | 272  | 272  | 3.0E+04                               | 3.0E+04 | 3.0E+04 | 21.7            | 3                     | 0         | 0         | 1        | 0         | ISOFORM 1 OF SYNAPTAPHYSIN-LIKE PROTEIN 2, HYPOTHETICAL PROTEIN DKFZP686I0180 (FRAGMENT).;                                                                                                        |                                                                                                                                                                                                                                                                                                                                                                                                                                        |                                                                                                                                                                                                                                                                                                                                                                                        |
| 524            | IPI00375704; IPI00479306                                                                                            | PSMB5         | 263                                  | 266  | 265  | 2.8E+04                               | 2.9E+04 | 2.9E+04 | 15.8            | 4                     | 0         | 0         | 1        | 1         | PROTEASOME BETA 5 SUBUNIT.                                                                                                                                                                        |                                                                                                                                                                                                                                                                                                                                                                                                                                        | Q7Z3B5; Q9TNN9 Q7Z3B5_HUMAN; Q9TNN9_HUMAN                                                                                                                                                                                                                                                                                                                                              |
| 525            | IPI00479877                                                                                                         | ALDH9A1       | 518                                  | 518  | 518  | 5.6E+04                               | 5.6E+04 | 5.6E+04 | 15.6            | 7                     | 1         | 1         | 1        | 1         | ALDEHYDE DEHYDROGENASE 9A1.                                                                                                                                                                       |                                                                                                                                                                                                                                                                                                                                                                                                                                        | Q6NSM2 Q6NSM2_HUMAN                                                                                                                                                                                                                                                                                                                                                                    |
| 526            | IPI00479905                                                                                                         | NDUFB10       | 172                                  | 172  | 172  | 2.1E+04                               | 2.1E+04 | 2.1E+04 | 30.8            | 4                     | 0         | 0         | 1        | 1         | NADH DEHYDROGENASE [UBIQUINONE] 1 BETA SUBCOMPLEX SUBUNIT 10.                                                                                                                                     |                                                                                                                                                                                                                                                                                                                                                                                                                                        | Q96000 NDUBA_HUMAN                                                                                                                                                                                                                                                                                                                                                                     |
| 527            | IPI00513979                                                                                                         | SEPW1         | 89                                   | 89   | 89   | 9.6E+03                               | 9.6E+03 | 9.6E+03 | 11.2            | 3                     | 0         | 0         | 1        | 1         | SELENOPROTEIN W.                                                                                                                                                                                  |                                                                                                                                                                                                                                                                                                                                                                                                                                        |                                                                                                                                                                                                                                                                                                                                                                                        |
| 528            | IPI00549467                                                                                                         | NIT2          | 276                                  | 276  | 276  | 3.1E+04                               | 3.1E+04 | 3.1E+04 | 13.8            | 3                     | 0         | 0         | 1        | 0         | NITRILASE FAMILY MEMBER 2.                                                                                                                                                                        |                                                                                                                                                                                                                                                                                                                                                                                                                                        | Q8WUF0; Q9NQR4 Q8WUF0_HUMAN; Q9NQR4_HUMAN                                                                                                                                                                                                                                                                                                                                              |
| 529            | IPI00003925; IPI00549885; IPI00798351                                                                               | PDHB          | 317                                  | 359  | 339  | 3.5E+04                               | 3.9E+04 | 3.7E+04 | 31.8            | 10                    | 1         | 1         | 1        | 1         | ISOFORM 1 OF PYRUVATE DEHYDROGENASE E1 COMPONENT SUBUNIT BETA, MITOCHONDRIAL PRECURSOR.; ISOFORM 2 OF PYRUVATE DEHYDROGENASE E1 COMPONENT SUBUNIT BETA, MITOCHONDRIAL PRECURSOR.; 35 KDA PROTEIN. |                                                                                                                                                                                                                                                                                                                                                                                                                                        | ; ODPB_HUMAN Q9GB3_HUMAN; Q8IZK8_HUMAN; Q96FD7_HUMAN; Q9BQ80_HUMAN; RINI_HUMAN Q6IAN0_HUMAN; Q6UX59_HUMAN; Q9BTF9; Q9UFM6 P07305; Q6FG88; Q8N6R3 Q2L9C1; Q3LXA3; Q53E09; Q9BVA7; Q9H895; Q9UFX5 P01009; Q0PVP5; Q13672; Q53XB8; Q5U0M1; Q96BF9; Q96ES1; Q9P1P0                                                                                                                         |
| 530            | IPI00550069; IPI00783491                                                                                            | RNH1          | 461                                  | 461  | 461  | 5.0E+04                               | 5.0E+04 | 5.0E+04 | 9.8             | 4                     | 1         | 1         | 1        | 1         | RIBONUCLEASE INHIBITOR.; RIBONUCLEASE/ANGIOGENIN INHIBITOR. DEHYDROGENASE/REDUCTASE (SDR FAMILY) MEMBER 7B.                                                                                       |                                                                                                                                                                                                                                                                                                                                                                                                                                        | ; ODPB_HUMAN Q9GB3_HUMAN; Q8IZK8_HUMAN; Q96FD7_HUMAN; Q9BQ80_HUMAN; RINI_HUMAN Q6IAN0_HUMAN; Q6UX59_HUMAN; Q9BTF9; Q9UFM6 P07305; Q6FG88; Q8N6R3 Q2L9C1; Q3LXA3; Q53E09; Q9BVA7; Q9H895; Q9UFX5 P01009; Q0PVP5; Q13672; Q53XB8; Q5U0M1; Q96BF9; Q96ES1; Q9P1P0                                                                                                                         |
| 531            | IPI00550165                                                                                                         | DHRS7B        | 325                                  | 325  | 325  | 3.5E+04                               | 3.5E+04 | 3.5E+04 | 8.3             | 2                     | 0         | 0         | 1        | 0         |                                                                                                                                                                                                   |                                                                                                                                                                                                                                                                                                                                                                                                                                        | Q6IAN0_HUMAN; Q6UX59_HUMAN; Q9BTF9; Q9UFM6 P07305; Q6FG88; Q8N6R3 Q2L9C1; Q3LXA3; Q53E09; Q9BVA7; Q9H895; Q9UFX5 P01009; Q0PVP5; Q13672; Q53XB8; Q5U0M1; Q96BF9; Q96ES1; Q9P1P0                                                                                                                                                                                                        |
| 532            | IPI00550239                                                                                                         | H1FO          | 194                                  | 194  | 194  | 2.1E+04                               | 2.1E+04 | 2.1E+04 | 10.8            | 2                     | 0         | 0         | 1        | 0         | HISTONE H1.0.                                                                                                                                                                                     |                                                                                                                                                                                                                                                                                                                                                                                                                                        | H10_HUMAN                                                                                                                                                                                                                                                                                                                                                                              |
| 533            | IPI00551024                                                                                                         | DAK           | 575                                  | 575  | 575  | 5.9E+04                               | 5.9E+04 | 5.9E+04 | 5.7             | 2                     | 0         | 0         | 1        | 0         | DIHYDROXYACETONE KINASE.                                                                                                                                                                          |                                                                                                                                                                                                                                                                                                                                                                                                                                        | DAK_HUMAN; Q2L9C1_HUMAN; Q9UFX5_HUMAN                                                                                                                                                                                                                                                                                                                                                  |
| 534            | IPI00553177                                                                                                         | SERPINA1      | 418                                  | 418  | 418  | 4.7E+04                               | 4.7E+04 | 4.7E+04 | 51.7            | 18                    | 1         | 1         | 1        | 1         | ALPHA-1-ANTITRYPSIN PRECURSOR.                                                                                                                                                                    |                                                                                                                                                                                                                                                                                                                                                                                                                                        | A1AT_HUMAN; Q0PVP5_HUMAN; Q53XB8_HUMAN                                                                                                                                                                                                                                                                                                                                                 |

| Protein Group <sup>a</sup> | IPI ID                                                                                     | IPI gene name | Amino Acids in Sequence <sup>b</sup> |       |       | Protein Molecular Weight <sup>c</sup> |         |         | Seq. Cov. (max) | Unique Peptides (max) | Detection |           |          |           | Protein name                                                                                                                        | Uniprot Id                                                                                                                                                                                                                                     | Uniprot Entry Name                                                                                                                                                                                                                                                                                                            |
|----------------------------|--------------------------------------------------------------------------------------------|---------------|--------------------------------------|-------|-------|---------------------------------------|---------|---------|-----------------|-----------------------|-----------|-----------|----------|-----------|-------------------------------------------------------------------------------------------------------------------------------------|------------------------------------------------------------------------------------------------------------------------------------------------------------------------------------------------------------------------------------------------|-------------------------------------------------------------------------------------------------------------------------------------------------------------------------------------------------------------------------------------------------------------------------------------------------------------------------------|
|                            |                                                                                            |               | Min.                                 | Max.  | Mean  | Min.                                  | Max.    | Mean    |                 |                       | Expt. I-1 | Expt. I-2 | Expt. II | Expt. III |                                                                                                                                     |                                                                                                                                                                                                                                                |                                                                                                                                                                                                                                                                                                                               |
| 535                        | IPI00554521                                                                                | FTH1          | 183                                  | 183   | 183   | 2.1E+04                               | 2.1E+04 | 2.1E+04 | 33.3            | 5                     | 0         | 0         | 1        | 1         | FERRITIN HEAVY CHAIN. UBIQUINOL-CYTOCHROME C REDUCTASE COMPLEX 7.2 KDA PROTEIN.                                                     | P02794; Q3KRA8; Q3SWW1; Q6NS36; Q6NZ44                                                                                                                                                                                                         | FRIH_HUMAN; Q6NS36_HUMAN; Q6NZ44_HUMAN                                                                                                                                                                                                                                                                                        |
| 536                        | IPI00554701                                                                                | UCRC          | 63                                   | 63    | 63    | 7.3E+03                               | 7.3E+03 | 7.3E+03 | 38.1            | 2                     | 0         | 0         | 1        | 1         | CDNA FLJ45706 FIS, CLONE FEBRA2028457, HIGHLY SIMILAR TO NUCLEOLIN.; ISOFORM 1 OF NUCLEOLIN.; ISOFORM 2 OF NUCLEOLIN.               | Q972V6; Q9UDW1                                                                                                                                                                                                                                 | UCR10_HUMAN                                                                                                                                                                                                                                                                                                                   |
| 537                        | IPI00444262; IPI00604620; IPI00827674                                                      | NCL           | 603                                  | 710   | 667   | 6.6E+04                               | 7.7E+04 | 7.2E+04 | 9.8             | 4                     | 1         | 1         | 1        | 0         | NADH-UBIQUINONE OXIDOREDUCTASE 75 KDA SUBUNIT, MITOCHONDRIALPRECURSOR.                                                              | P19338; Q53SK1; Q6ZS99; Q8NB06                                                                                                                                                                                                                 | NUCL_HUMAN; Q6ZS99_HUMAN                                                                                                                                                                                                                                                                                                      |
| 538                        | IPI00604664                                                                                | NDUFS1        | 727                                  | 727   | 727   | 7.9E+04                               | 7.9E+04 | 7.9E+04 | 36.2            | 21                    | 1         | 1         | 1        | 1         | Q95817; Q3B763; Q53G71; Q9NT20; Q9P120                                                                                              | NDUS1_HUMAN                                                                                                                                                                                                                                    |                                                                                                                                                                                                                                                                                                                               |
| 539                        | IPI00641582                                                                                | BAG3          | 575                                  | 575   | 575   | 6.2E+04                               | 6.2E+04 | 6.2E+04 | 4.7             | 2                     | 1         | 1         | 1        | 0         | BAG FAMILY MOLECULAR CHAPERONE REGULATOR 3. ELONGATION FACTOR 1-DELTA.; EUKARYOTIC TRANSLATION ELONGATION FACTOR 1 DELTA ISOFORM 1. | P29692; Q71RH4; Q969J1; Q96I38; Q9BW34; Q9HTG6                                                                                                                                                                                                 | BAG3_HUMAN; Q53GY1_HUMAN; EF1D_HUMAN; Q71RH4_HUMAN; Q96I38_HUMAN; Q9BW34_HUMAN; Q9HTG6_HUMAN                                                                                                                                                                                                                                  |
| 540                        | IPI00023048; IPI00642971                                                                   | EEF1D         | 281                                  | 647   | 464   | 3.1E+04                               | 7.1E+04 | 5.1E+04 | 22.1            | 4                     | 1         | 1         | 1        | 1         | HEBP2 PROTEIN (FRAGMENT).                                                                                                           | Q05DB4                                                                                                                                                                                                                                         | Q05DB4_HUMAN                                                                                                                                                                                                                                                                                                                  |
| 541                        | IPI00644697                                                                                | HEBP2         | 214                                  | 214   | 214   | 2.4E+04                               | 2.4E+04 | 2.4E+04 | 9.4             | 2                     | 0         | 0         | 1        | 0         | PROTEIN S100-A1.                                                                                                                    | P23297; Q57Y73                                                                                                                                                                                                                                 | S10A1_HUMAN                                                                                                                                                                                                                                                                                                                   |
| 542                        | IPI00645016                                                                                | S100A1        | 94                                   | 94    | 94    | 1.1E+04                               | 1.1E+04 | 1.1E+04 | 38.3            | 2                     | 0         | 0         | 1        | 1         | UBIQUITIN-ACTIVATING ENZYME E1.                                                                                                     | P22314; Q5JRR8; Q96E13                                                                                                                                                                                                                         | Q5JRR8_HUMAN; UBE1_HUMAN                                                                                                                                                                                                                                                                                                      |
| 543                        | IPI00645078                                                                                | UBE1          | 1058                                 | 1058  | 1058  | 1.2E+05                               | 1.2E+05 | 1.2E+05 | 24.1            | 16                    | 1         | 1         | 1        | 1         | INTEGRIN BETA 1 ISOFORM 1A PRECURSOR.                                                                                               | Q8WUM6                                                                                                                                                                                                                                         | Q8WUM6_HUMAN                                                                                                                                                                                                                                                                                                                  |
| 544                        | IPI00645194                                                                                | ITGB1         | 798                                  | 798   | 798   | 8.8E+04                               | 8.8E+04 | 8.8E+04 | 3.3             | 2                     | 1         | 0         | 1        | 0         | PROTEIN.                                                                                                                            | P02023; P68871; Q13852; Q14477; Q14481; Q14510; Q3LR79; Q3Y9I8; Q45KT0; Q4F786; Q4JLR8; Q4TWB7; Q4TZM4; Q52MT0; Q549N7; Q6FI08; Q6J1Z7; Q6J1Z8; Q6R7N2; Q6VFQ5; Q6VFO6; Q8IUL9; Q8IZI0; Q8IZI1; Q9BX96; Q9GZL9; Q9UCP8; Q9UCP9; Q9UE58; Q9UK54 | HBB_HUMAN; Q14477_HUMAN; Q3LR79_HUMAN; Q3Y9I8_HUMAN; Q4F786_HUMAN; Q4JLR8_HUMAN; Q4TWB7_HUMAN; Q4TZM4_HUMAN; Q52MT0_HUMAN; Q549N7_HUMAN; Q6J1Z7_HUMAN; Q6J1Z8_HUMAN; Q6R7N2_HUMAN; Q6VFQ5_HUMAN; Q8IUL9_HUMAN; Q8IZI0_HUMAN; Q8IZI1_HUMAN; Q9BX96_HUMAN; Q9GZL9_HUMAN; Q9UCP8_HUMAN; Q9UCP9_HUMAN; Q9UE58_HUMAN; Q9UK54_HUMAN |
| 545                        | IPI00645836                                                                                | ESD           | 230                                  | 230   | 230   | 2.5E+04                               | 2.5E+04 | 2.5E+04 | 18.7            | 3                     | 0         | 0         | 1        | 0         | HEMOGLOBIN SUBUNIT BETA. 40S RIBOSOMAL PROTEIN S28.; 8 KDA PROTEIN.                                                                 | P25112; P62857                                                                                                                                                                                                                                 | Q82857_HUMAN                                                                                                                                                                                                                                                                                                                  |
| 546                        | IPI00654755                                                                                | HBB           | 147                                  | 147   | 147   | 1.6E+04                               | 1.6E+04 | 1.6E+04 | 96.6            | 21                    | 1         | 1         | 1        | 1         | GLUTATHIONE S-TRANSFERASE THETA-1. HYPOTHETICAL PROTEIN DKFZP451D234.; GENERAL VESICULAR TRANSPORT FACTOR P115.                     | O00226; P30711; Q5TZY2; Q969K8; Q96IY3                                                                                                                                                                                                         | GSTT1_HUMAN; Q5TZY2_HUMAN                                                                                                                                                                                                                                                                                                     |
| 547                        | IPI00719622; IPI00787692                                                                   | LOC645899;    | 69                                   | 69    | 69    | 7.8E+03                               | 7.8E+03 | 7.8E+03 | 30.4            | 2                     | 0         | 0         | 1        | 0         | GLUTATHIONE S-TRANSFERASE THETA-1. HYPOTHETICAL PROTEIN DKFZP451D234.; GENERAL VESICULAR TRANSPORT FACTOR P115.                     | O60763; Q6PK63; Q86TB8; Q8N592                                                                                                                                                                                                                 | Q86TB8_HUMAN; VDP_HUMAN                                                                                                                                                                                                                                                                                                       |
| 548                        | IPI00741097                                                                                | GSTT1         | 240                                  | 240   | 240   | 2.7E+04                               | 2.7E+04 | 2.7E+04 | 20.8            | 4                     | 0         | 0         | 1        | 0         | GLUTATHIONE PEROXIDASE 4 ISOFORM C PRECURSOR.                                                                                       | Q6PJX4                                                                                                                                                                                                                                         | Q6PJX4_HUMAN                                                                                                                                                                                                                                                                                                                  |
| 549                        | IPI00031583; IPI00743314                                                                   | VDP           | 962                                  | 973   | 968   | 1.1E+05                               | 1.1E+05 | 1.1E+05 | 12.3            | 9                     | 1         | 1         | 1        | 1         | SELENIUM BINDING PROTEIN 1.                                                                                                         | Q49A08; Q96GX7                                                                                                                                                                                                                                 | Q49A08_HUMAN; Q96GX7_HUMAN                                                                                                                                                                                                                                                                                                    |
| 550                        | IPI00745335                                                                                | GPX4          | 234                                  | 234   | 234   | 2.7E+04                               | 2.7E+04 | 2.7E+04 | 15.8            | 3                     | 0         | 0         | 1        | 0         | ISOFORM 1 OF SERUM ALBUMIN PRECURSOR.                                                                                               | Q9P157; Q9P117; Q9UHS3; Q9UJZ0                                                                                                                                                                                                                 | ALBU_HUMAN; Q645G4_HUMAN                                                                                                                                                                                                                                                                                                      |
| 551                        | IPI00745729                                                                                | SELENBP1      | 478                                  | 478   | 478   | 5.3E+04                               | 5.3E+04 | 5.3E+04 | 35.6            | 15                    | 1         | 1         | 1        | 1         | ISOFORM 1 OF WD REPEAT PROTEIN 1. PROLYL ENDOPEPTIDASE.                                                                             | Q9UJ0E                                                                                                                                                                                                                                         | Q9UJ0E_HUMAN                                                                                                                                                                                                                                                                                                                  |
| 552                        | IPI00745872                                                                                | ALB           | 609                                  | 609   | 609   | 6.9E+04                               | 6.9E+04 | 6.9E+04 | 38.1            | 31                    | 1         | 1         | 1        | 1         | SUCCINATE-COA LIGASE, GDP-FORMING, ALPHA SUBUNIT.                                                                                   | Q6IAL5                                                                                                                                                                                                                                         | Q6IAL5_HUMAN                                                                                                                                                                                                                                                                                                                  |
| 553                        | IPI00746165                                                                                | WDR1          | 606                                  | 606   | 606   | 6.6E+04                               | 6.6E+04 | 6.6E+04 | 21.6            | 7                     | 1         | 1         | 1        | 1         | ISOFORM 8 OF TITIN.; ISOFORM 1 OF TITIN. GAMMA FILAMIN VARIANT.                                                                     | Q9UG05; Q9UG78; Q9UJ0E                                                                                                                                                                                                                         | Q53GN4_HUMAN; Q53H17_HUMAN; Q59ER5_HUMAN; WDR1_HUMAN                                                                                                                                                                                                                                                                          |
| 554                        | IPI00747355                                                                                | PREP          | 710                                  | 710   | 710   | 8.1E+04                               | 8.1E+04 | 8.1E+04 | 33.1            | 17                    | 1         | 1         | 1        | 1         | MITOCHONDRIAL PRECURSOR.; ISOFORM SHORT OF ES1 PROTEIN HOMOLOG, MITOCHONDRIAL PRECURSOR.; 25 KDA PROTEIN.; 28 KDA PROTEIN.          | Q8N6D4; Q9UM02                                                                                                                                                                                                                                 | Q8N6D4_HUMAN; Q9UM02_HUMAN                                                                                                                                                                                                                                                                                                    |
| 555                        | IPI00759493                                                                                | SUCLG1        | 346                                  | 346   | 346   | 3.6E+04                               | 3.6E+04 | 3.6E+04 | 22.8            | 6                     | 0         | 0         | 1        | 1         | ISOFORM 8 OF TITIN.; ISOFORM 1 OF TITIN. GAMMA FILAMIN VARIANT.                                                                     | Q9UJ0E; Q9UJ02                                                                                                                                                                                                                                 | Q9UJ0E_HUMAN; Q9UJ02_HUMAN                                                                                                                                                                                                                                                                                                    |
| 556                        | IPI00759542; IPI00759754                                                                   | TTN           | 34350                                | 34474 | 34412 | 3.8E+06                               | 3.8E+06 | 3.8E+06 | 0.1             | 3                     | 0         | 0         | 1        | 1         | ISOFORM 8 OF TITIN.; ISOFORM 1 OF TITIN. GAMMA FILAMIN VARIANT.                                                                     | Q9UJ0E; Q9UJ02                                                                                                                                                                                                                                 | TTN_HUMAN                                                                                                                                                                                                                                                                                                                     |
| 557                        | IPI00783128                                                                                | FLNC          | 2705                                 | 2705  | 2705  | 2.9E+05                               | 2.9E+05 | 2.9E+05 | 33.8            | 71                    | 1         | 1         | 1        | 1         | ISOFORM 8 OF TITIN.; ISOFORM 1 OF TITIN. GAMMA FILAMIN VARIANT.                                                                     | Q9UJ0E; Q9UJ02                                                                                                                                                                                                                                 | Q59H94_HUMAN                                                                                                                                                                                                                                                                                                                  |
| 558                        | IPI00024913; IPI000218482; IPI00784162; IPI00784277; IPI00793677; IPI00794316; IPI00795385 | C21orf33      | 217                                  | 268   | 244   | 2.3E+04                               | 2.8E+04 | 2.6E+04 | 19.8            | 3                     | 1         | 0         | 1        | 1         | ISOFORM 8 OF TITIN.; ISOFORM 1 OF TITIN. GAMMA FILAMIN VARIANT.                                                                     | Q92507                                                                                                                                                                                                                                         | ES1_HUMAN                                                                                                                                                                                                                                                                                                                     |

| Protein Group <sup>a</sup> | IPI ID                                                                                                 | IPI gene name   | Amino Acids in Sequence <sup>b</sup> |      |      | Protein Molecular Weight <sup>c</sup> |         |         | Seq. Cov. (max) | Unique Peptides (max) | Detection |           |          |           | Protein name                                                                                                                                                                                                                                                                                                                                                                                                                                                      | Uniprot Id                                                                                                                                                             | Uniprot Entry Name                                                                                                                   |
|----------------------------|--------------------------------------------------------------------------------------------------------|-----------------|--------------------------------------|------|------|---------------------------------------|---------|---------|-----------------|-----------------------|-----------|-----------|----------|-----------|-------------------------------------------------------------------------------------------------------------------------------------------------------------------------------------------------------------------------------------------------------------------------------------------------------------------------------------------------------------------------------------------------------------------------------------------------------------------|------------------------------------------------------------------------------------------------------------------------------------------------------------------------|--------------------------------------------------------------------------------------------------------------------------------------|
|                            |                                                                                                        |                 | Min.                                 | Max. | Mean | Min.                                  | Max.    | Mean    |                 |                       | Expt. I-1 | Expt. I-2 | Expt. II | Expt. III |                                                                                                                                                                                                                                                                                                                                                                                                                                                                   |                                                                                                                                                                        |                                                                                                                                      |
| 559                        | IPI00216704; IPI00237806; IPI00783228; IPI00784382                                                     | SPTB            | 2106                                 | 2328 | 2225 | 2.4E+05                               | 2.7E+05 | 2.6E+05 | 4.8             | 10                    | 1         | 1         | 1        | 1         | ISOFORM 2 OF SPECTRIN BETA CHAIN, ERYTHROCYTE.; ISOFORM 3 OF SPECTRIN BETA CHAIN, ERYTHROCYTE.; ISOFORM 1 OF SPECTRIN BETA CHAIN, ERYTHROCYTE.; SPECTRIN BETA ISOFORM A. SIMILAR TO PLASMA MEMBRANE ASSOCIATED PROTEIN, S3-12.                                                                                                                                                                                                                                    | O14724; O14725; O14726; P11277; O15510; O15519; O59FP5; Q71VG0; Q71VG1; Q71VG2                                                                                         | O14724_HUMAN; O14725_HUMAN; O14726_HUMAN; Q59FP5_HUMAN; Q71VG0_HUMAN; Q71VG1_HUMAN; Q71VG2_HUMAN; SPTB1_HUMAN                        |
| 560                        | IPI00787298                                                                                            | KIAA1881        | 1423                                 | 1423 | 1423 | 1.4E+05                               | 1.4E+05 | 1.4E+05 | 14.2            | 14                    | 0         | 1         | 1        | 1         | Q96Q06                                                                                                                                                                                                                                                                                                                                                                                                                                                            | Q96Q06_HUMAN                                                                                                                                                           |                                                                                                                                      |
| 561                        | IPI00787362                                                                                            | LOC730839       | 1885                                 | 1885 | 1885 | 1.9E+05                               | 1.9E+05 | 1.9E+05 | 3.5             | 3                     | 0         | 0         | 1        | 0         |                                                                                                                                                                                                                                                                                                                                                                                                                                                                   |                                                                                                                                                                        |                                                                                                                                      |
| 562                        | IPI00789324                                                                                            | JUP             | 745                                  | 745  | 745  | 8.2E+04                               | 8.2E+04 | 8.2E+04 | 8.2             | 5                     | 0         | 0         | 1        | 0         | JUP PROTEIN.                                                                                                                                                                                                                                                                                                                                                                                                                                                      | Q7L3S5                                                                                                                                                                 | Q7L3S5_HUMAN                                                                                                                         |
| 563                        | IPI00792715                                                                                            | ENO2            | 341                                  | 341  | 341  | 3.7E+04                               | 3.7E+04 | 3.7E+04 | 7.3             | 4                     | 0         | 0         | 1        | 0         | 37 KDA PROTEIN.                                                                                                                                                                                                                                                                                                                                                                                                                                                   |                                                                                                                                                                        |                                                                                                                                      |
| 564                        | IPI00793379                                                                                            |                 | 1463                                 | 1463 | 1463 | 1.6E+05                               | 1.6E+05 | 1.6E+05 | 28.8            | 38                    | 1         | 1         | 1        | 1         | 165 KDA PROTEIN.                                                                                                                                                                                                                                                                                                                                                                                                                                                  |                                                                                                                                                                        |                                                                                                                                      |
| 565                        | IPI00020599; IPI00793605                                                                               | CALR            | 322                                  | 417  | 370  | 3.7E+04                               | 4.8E+04 | 4.2E+04 | 9.3             | 2                     | 1         | 1         | 1        | 0         | CALRETICULIN PRECURSOR.; 37 KDA PROTEIN.                                                                                                                                                                                                                                                                                                                                                                                                                          | P27797; Q3B830; Q53G71; Q6IAT4                                                                                                                                         | ; CALR_HUMAN; Q3B830_HUMAN; Q53G71_HUMAN; Q6IAT4_HUMAN                                                                               |
| 566                        | IPI00794080                                                                                            |                 | 1968                                 | 1968 | 1968 | 2.3E+05                               | 2.3E+05 | 2.3E+05 | 22.9            | 77                    | 0         | 1         | 1        | 1         | 227 KDA PROTEIN.                                                                                                                                                                                                                                                                                                                                                                                                                                                  |                                                                                                                                                                        |                                                                                                                                      |
| 567                        | IPI00794464                                                                                            | CMYA1           | 1843                                 | 1843 | 1843 | 2.0E+05                               | 2.0E+05 | 2.0E+05 | 7.3             | 9                     | 1         | 1         | 1        | 1         | CARDIOMYOPATHY-ASSOCIATED PROTEIN 1.                                                                                                                                                                                                                                                                                                                                                                                                                              | Q68DF2; Q702N8; Q702N9; Q8TCG7                                                                                                                                         | Q68DF2_HUMAN; Q702N8_HUMAN; Q702N9_HUMAN; Q8TCG7_HUMAN                                                                               |
| 568                        | IPI00794849                                                                                            | SLMAP           | 409                                  | 409  | 409  | 4.7E+04                               | 4.7E+04 | 4.7E+04 | 5.6             | 2                     | 0         | 0         | 1        | 0         | PROTEIN. SIMILAR TO NASCENT POLYPEPTIDE ASSOCIATED                                                                                                                                                                                                                                                                                                                                                                                                                |                                                                                                                                                                        |                                                                                                                                      |
| 569                        | IPI00797126                                                                                            | NACA            | 925                                  | 925  | 925  | 9.5E+04                               | 9.5E+04 | 9.5E+04 | 9.1             | 6                     | 0         | 0         | 1        | 1         | COMPLEX ALPHA SUBUNIT.                                                                                                                                                                                                                                                                                                                                                                                                                                            |                                                                                                                                                                        |                                                                                                                                      |
| 570                        | IPI00798211                                                                                            | TBCB            | 214                                  | 214  | 214  | 2.4E+04                               | 2.4E+04 | 2.4E+04 | 10.3            | 2                     | 0         | 0         | 1        | 0         | 24 KDA PROTEIN.                                                                                                                                                                                                                                                                                                                                                                                                                                                   |                                                                                                                                                                        |                                                                                                                                      |
| 571                        | IPI00815770                                                                                            | SNX3            | 162                                  | 162  | 162  | 1.9E+04                               | 1.9E+04 | 1.9E+04 | 10.5            | 2                     | 0         | 0         | 1        | 0         | ISOFORM 1 OF SORTING NEXIN-3.                                                                                                                                                                                                                                                                                                                                                                                                                                     | O60493; O60718; Q4TT31; Q5JXJ7; Q5JXJ8; Q86AP9; Q9C0J5; Q9NU45; Q53HU8; Q5TCW3; Q8WYJ5; Q9BX68; P26678; Q5R352; Q3MJE6; Q86T41; Q86TB1; Q8TEF9; Q96IV5; Q9BQ58; Q9H8P9 | Q4TT31_HUMAN; SNX3_HUMAN; HINT2_HUMAN; Q53HU8_HUMAN; Q5TCW3_HUMAN; Q8WYJ5_HUMAN; PPLA_HUMAN; Q5R352_HUMAN                            |
| 572                        | IPI00000335                                                                                            | HINT2           | 163                                  | 163  | 163  | 1.7E+04                               | 1.7E+04 | 1.7E+04 | 31.3            | 3                     | 1         | 0         | 0        | 1         | HISTIDINE TRIAD NUCLEOTIDE-BINDING PROTEIN 2.                                                                                                                                                                                                                                                                                                                                                                                                                     |                                                                                                                                                                        |                                                                                                                                      |
| 573                        | IPI00000935                                                                                            | PLN             | 52                                   | 52   | 52   | 6.1E+03                               | 6.1E+03 | 6.1E+03 | 23.1            | 3                     | 0         | 0         | 0        | 1         | CARDIAC PHOSPHOLAMBAN.                                                                                                                                                                                                                                                                                                                                                                                                                                            |                                                                                                                                                                        |                                                                                                                                      |
| 574                        | IPI00001580                                                                                            | FYCO1           | 1478                                 | 1478 | 1478 | 1.7E+05                               | 1.7E+05 | 1.7E+05 | 1.8             | 2                     | 0         | 0         | 0        | 1         | ISOFORM 1 OF FYVE AND COILED-COIL DOMAIN-CONTAINING PROTEIN 1.                                                                                                                                                                                                                                                                                                                                                                                                    |                                                                                                                                                                        | FYCO1_HUMAN                                                                                                                          |
| 575                        | IPI00001952                                                                                            | ENDOD1          | 500                                  | 500  | 500  | 5.5E+04                               | 5.5E+04 | 5.5E+04 | 9.0             | 3                     | 1         | 1         | 0        | 1         | ENDONUCLEASE DOMAIN-CONTAINING 1 PROTEIN PRECURSOR.                                                                                                                                                                                                                                                                                                                                                                                                               | Q94919; Q8TAQ8; A0AVQ2; Q43476; Q16821; Q75L88; Q7KYM8; Q86UJ6                                                                                                         | ENDD1_HUMAN                                                                                                                          |
| 576                        | IPI00003091                                                                                            | PPP1R3A         | 1122                                 | 1122 | 1122 | 1.3E+05                               | 1.3E+05 | 1.3E+05 | 2.4             | 2                     | 0         | 0         | 0        | 1         | ISOFORM 1 OF PROTEIN PHOSPHATASE 1 REGULATORY SUBUNIT 3A. GUANINE NUCLEOTIDE-BINDING PROTEIN G(I)/G(S)/G(T) SUBUNIT BETA 2.; GUANINE NUCLEOTIDE-BINDING PROTEIN SUBUNIT BETA 4.; GUANINE NUCLEOTIDE-BINDING PROTEIN G(I)/G(S)/G(T) SUBUNIT BETA 1.; GUANINE NUCLEOTIDE BINDING PROTEIN (G PROTEIN), BETA POLYPEPTIDE 1.; GUANINE NUCLEOTIDE BINDING PROTEIN (G PROTEIN), BETA POLYPEPTIDE 1.; GUANINE NUCLEOTIDE BINDING PROTEIN (G PROTEIN), BETA POLYPEPTIDE 1. | P04697; P04901; P11016; P54312; P62873; P62879; Q1RMY8; Q4VXS9; Q4VXT0; Q4VXT1; Q5QPR5; Q6FHM2; Q71UM6; Q9HAV0                                                         | GBB1_HUMAN; GBB2_HUMAN; GBB4_HUMAN; Q1RMY8_HUMAN; Q4VXS9_HUMAN; Q4VXT0_HUMAN; Q4VXT1_HUMAN; Q5QPR5_HUMAN; Q6FHM2_HUMAN; Q71UM6_HUMAN |
| 577                        | IPI00003348; IPI00012451; IPI00026268; IPI00639998; IPI00640462; IPI00640949                           | GNB1; GNB2; GNE | 108                                  | 340  | 235  | 1.2E+04                               | 3.8E+04 | 2.6E+04 | 6.2             | 2                     | 0         | 0         | 0        | 1         | ISOFORM 1 OF MICROTUBULE-ASSOCIATED PROTEIN RP/EB FAMILY MEMBER 2.                                                                                                                                                                                                                                                                                                                                                                                                | Q15555; Q9UQ33; P11171; P11176; Q14245; Q1VWWM3; Q29RX4; Q4VB86; Q4VB87; Q59F12; Q5TB33; Q5TB35; Q5TB36; Q5VXN8; Q8XV9; Q9V578; Q9V579; Q16853; Q45F94; Q9UEU7         | MARE2_HUMAN                                                                                                                          |
| 578                        | IPI00003420                                                                                            | MAPRE2          | 327                                  | 327  | 327  | 3.7E+04                               | 3.7E+04 | 3.7E+04 | 11.3            | 2                     | 0         | 0         | 0        | 1         | ISOFORM 1 OF PROTEIN 4.1.; ISOFORM 2 OF PROTEIN 4.1.; ISOFORM 3 OF PROTEIN 4.1.; ISOFORM 4 OF PROTEIN 4.1.; ISOFORM 5 OF PROTEIN 4.1.; ISOFORM 6 OF PROTEIN 4.1.; EPB41 PROTEIN (FRAGMENT).; HYPOTHETICAL PROTEIN (FRAGMENT).                                                                                                                                                                                                                                     | Q15555; Q9UQ33; P11171; P11176; Q14245; Q1VWWM3; Q29RX4; Q4VB86; Q4VB87; Q59F12; Q5TB33; Q5TB35; Q5TB36; Q5VXN8; Q8XV9; Q9V578; Q9V579; Q16853; Q45F94; Q9UEU7         | 41_HUMAN; Q1VWWM3_HUMAN; Q29RX4_HUMAN; Q4VB86_HUMAN; Q4VB87_HUMAN; Q59F12_HUMAN; Q5TB33_HUMAN; Q5TB36_HUMAN                          |
| 579                        | IPI00003921; IPI00218697; IPI00218698; IPI00218699; IPI00218700; IPI00218701; IPI00739613; IPI00791144 | EPB41           | 566                                  | 864  | 695  | 6.3E+04                               | 9.7E+04 | 7.8E+04 | 4.9             | 2                     | 1         | 0         | 0        | 1         | MEMBRANE COPPER AMINE OXIDASE. MEMBRANE-ASSOCIATED PROGESTERONE RECEPTOR COMPONENT 2.                                                                                                                                                                                                                                                                                                                                                                             | Q15555; Q9UQ33; P11171; P11176; Q14245; Q1VWWM3; Q29RX4; Q4VB86; Q4VB87; Q59F12; Q5TB33; Q5TB35; Q5TB36; Q5VXN8; Q8XV9; Q9V578; Q9V579; Q16853; Q45F94; Q9UEU7         | AOC3_HUMAN; Q9UEU7_HUMAN                                                                                                             |
| 580                        | IPI00004457                                                                                            | AOC3            | 763                                  | 763  | 763  | 8.5E+04                               | 8.5E+04 | 8.5E+04 | 5.1             | 3                     | 0         | 0         | 0        | 1         | MEMBRANE COPPER AMINE OXIDASE. MEMBRANE-ASSOCIATED PROGESTERONE RECEPTOR COMPONENT 2.                                                                                                                                                                                                                                                                                                                                                                             |                                                                                                                                                                        |                                                                                                                                      |
| 581                        | IPI00005202                                                                                            | PGRMC2          | 247                                  | 247  | 247  | 2.6E+04                               | 2.6E+04 | 2.6E+04 | 11.3            | 2                     | 0         | 0         | 0        | 1         | 39S RIBOSOMAL PROTEIN L12, MITOCHONDRIAL PRECURSOR.                                                                                                                                                                                                                                                                                                                                                                                                               | P52815; Q969U0; Q96Q74; Q9HCA2; Q9UQJ3; Q69837; Q01082; Q16057; Q53R99; A2TDC0; O15273; Q96L27                                                                         | Q96Q74_HUMAN; RM12_HUMAN                                                                                                             |
| 582                        | IPI00005537                                                                                            | MRPL12          | 198                                  | 198  | 198  | 2.1E+04                               | 2.1E+04 | 2.1E+04 | 11.6            | 2                     | 0         | 0         | 0        | 1         | ISOFORM LONG OF SPECTRIN BETA CHAIN, BRAIN 1.                                                                                                                                                                                                                                                                                                                                                                                                                     |                                                                                                                                                                        |                                                                                                                                      |
| 583                        | IPI00005614                                                                                            | SPTBN1          | 2364                                 | 2364 | 2364 | 2.7E+05                               | 2.7E+05 | 2.7E+05 | 1.4             | 2                     | 0         | 0         | 0        | 1         | TELETHONIN. 13KDA DIFFERENTIATION-ASSOCIATED PROTEIN VARIANT (FRAGMENT).                                                                                                                                                                                                                                                                                                                                                                                          | Q16057; Q53R99; A2TDC0; O15273; Q96L27                                                                                                                                 | Q53R99_HUMAN; SPTB2_HUMAN                                                                                                            |
| 584                        | IPI00005755                                                                                            | TCAP            | 167                                  | 167  | 167  | 1.9E+04                               | 1.9E+04 | 1.9E+04 | 13.2            | 2                     | 0         | 0         | 0        | 1         | 13KDA DIFFERENTIATION-ASSOCIATED PROTEIN VARIANT (FRAGMENT).                                                                                                                                                                                                                                                                                                                                                                                                      |                                                                                                                                                                        | A2TDC0_HUMAN; TELT_HUMAN                                                                                                             |
| 585                        | IPI00005966                                                                                            | NDUFA12         | 146                                  | 146  | 146  | 1.7E+04                               | 1.7E+04 | 1.7E+04 | 19.9            | 2                     | 1         | 0         | 0        | 1         | MULTISYNTHETASE COMPLEX AUXILIARY COMPONENT P43.; 37 KDA PROTEIN.                                                                                                                                                                                                                                                                                                                                                                                                 | Q53HG1; Q53XX0; Q12904; Q6FG28; Q96CQ9                                                                                                                                 | Q53HG1_HUMAN; Q53XX0_HUMAN                                                                                                           |
| 586                        | IPI00006252; IPI00793201                                                                               | SCYE1           | 312                                  | 336  | 324  | 3.4E+04                               | 3.7E+04 | 3.6E+04 | 12.2            | 2                     | 0         | 0         | 0        | 1         |                                                                                                                                                                                                                                                                                                                                                                                                                                                                   |                                                                                                                                                                        | ; MCA1_HUMAN                                                                                                                         |

| Protein Group | IPI ID                                                                                                                           | IPI gene name       | Amino Acids in Sequence <sup>1</sup> |             |            | Protein Molecular Weight <sup>1</sup> |                    |                    | Seq. Cov. (max) | Unique Peptides (max) | Detection |           |          |           | Protein name                                                                                                                                                                                                                                                                                                                                                                                                                                                                                                                                 | Uniprot Id                                                                                                                                                                                                  | Uniprot Entry Name                                                                                                                                                                                                                                 |
|---------------|----------------------------------------------------------------------------------------------------------------------------------|---------------------|--------------------------------------|-------------|------------|---------------------------------------|--------------------|--------------------|-----------------|-----------------------|-----------|-----------|----------|-----------|----------------------------------------------------------------------------------------------------------------------------------------------------------------------------------------------------------------------------------------------------------------------------------------------------------------------------------------------------------------------------------------------------------------------------------------------------------------------------------------------------------------------------------------------|-------------------------------------------------------------------------------------------------------------------------------------------------------------------------------------------------------------|----------------------------------------------------------------------------------------------------------------------------------------------------------------------------------------------------------------------------------------------------|
|               |                                                                                                                                  |                     | Min.                                 | Max.        | Mean       | Min.                                  | Max.               | Mean               |                 |                       | Expt. I-1 | Expt. I-2 | Expt. II | Expt. III |                                                                                                                                                                                                                                                                                                                                                                                                                                                                                                                                              |                                                                                                                                                                                                             |                                                                                                                                                                                                                                                    |
|               | IPI00006721; IPI00107749; IPI00107750; IPI00107751; IPI00107752; IPI00107753; IPI00375149; IPI00375150; IPI00789199; IPI00797488 | OPA1 SEC22B         | 942<br>215                           | 1015<br>215 | 979<br>215 | 1.1E+05<br>2.5E+04                    | 1.2E+05<br>2.5E+04 | 1.1E+05<br>2.5E+04 | 9.4<br>12.1     | 6<br>2                | 1<br>0    | 1<br>0    | 0<br>0   | 1<br>1    | ISOFORM 1 OF DYNAMIN-LIKE 120 KDA PROTEIN, MITOCHONDRIAL PRECURSOR.; ISOFORM 5 OF DYNAMIN-LIKE 120 KDA PROTEIN, MITOCHONDRIAL PRECURSOR.; OPTIC ATROPHY 1 ISOFORM 5.; OPTIC ATROPHY 1 ISOFORM 6.; ISOFORM 2 OF DYNAMIN-LIKE 120 KDA PROTEIN, MITOCHONDRIAL PRECURSOR.; OPTIC ATROPHY 1 ISOFORM 8.; ISOFORM 8 OF DYNAMIN-LIKE 120 KDA PROTEIN, MITOCHONDRIAL PRECURSOR.; OPTIC ATROPHY 1 ISOFORM 3.; ISOFORM 7 OF DYNAMIN-LIKE 120 KDA PROTEIN, MITOCHONDRIAL PRECURSOR.; ISOFORM 3 OF DYNAMIN-LIKE 120 KDA PROTEIN, MITOCHONDRIAL PRECURSOR. | O60313; G6PEK6<br>O75396                                                                                                                                                                                    | ; OPA1_HUMAN; G6PEK6_HUMAN<br>SC22B_HUMAN                                                                                                                                                                                                          |
| 587           |                                                                                                                                  |                     |                                      |             |            |                                       |                    |                    |                 |                       |           |           |          |           |                                                                                                                                                                                                                                                                                                                                                                                                                                                                                                                                              |                                                                                                                                                                                                             |                                                                                                                                                                                                                                                    |
| 588           | IPI00006865                                                                                                                      |                     |                                      |             |            |                                       |                    |                    |                 |                       |           |           |          |           |                                                                                                                                                                                                                                                                                                                                                                                                                                                                                                                                              |                                                                                                                                                                                                             |                                                                                                                                                                                                                                                    |
| 589           | IPI00007755                                                                                                                      | RAB21               | 225                                  | 225         | 225        | 2.4E+04                               | 2.4E+04            | 2.4E+04            | 10.2            | 2                     | 0         | 0         | 0        | 1         | RAS-RELATED PROTEIN RAB-21.                                                                                                                                                                                                                                                                                                                                                                                                                                                                                                                  | Q96GX3; Q9UL25                                                                                                                                                                                              | ; Q96GX3_HUMAN; RAB21_HUMAN                                                                                                                                                                                                                        |
| 590           | IPI00008438; IPI00478810                                                                                                         | RPS10               | 165                                  | 172         | 169        | 1.9E+04                               | 2.0E+04            | 1.9E+04            | 14.6            | 2                     | 0         | 0         | 0        | 1         | 40S RIBOSOMAL PROTEIN S10.; RIBOSOMAL PROTEIN S10.                                                                                                                                                                                                                                                                                                                                                                                                                                                                                           | P46783; Q5TZB9;<br>Q5TZC0                                                                                                                                                                                   | ; Q5TZB9_HUMAN; Q5TZC0_HUMAN;<br>RS10_HUMAN                                                                                                                                                                                                        |
| 591           | IPI00009480; IPI00377080                                                                                                         | COPS8               | 160                                  | 209         | 185        | 1.8E+04                               | 2.3E+04            | 2.1E+04            | 19.1            | 2                     | 0         | 0         | 0        | 1         | COP9 SIGNALOSOME COMPLEX SUBUNIT 8.; COP9 SIGNALOSOME SUBUNIT 8 ISOFORM 2.                                                                                                                                                                                                                                                                                                                                                                                                                                                                   | Q53QS9; Q99627                                                                                                                                                                                              | ; CSN8_HUMAN; Q53QS9_HUMAN                                                                                                                                                                                                                         |
| 592           | IPI00009747; IPI00792647                                                                                                         | LSS                 | 262                                  | 732         | 497        | 3.0E+04                               | 8.3E+04            | 5.6E+04            | 10.7            | 2                     | 1         | 1         | 0        | 1         | LANOSTEROL SYNTHASE.; 30 KDA PROTEIN.                                                                                                                                                                                                                                                                                                                                                                                                                                                                                                        | Q53QS9; Q99627<br>P48449; Q81YL6;<br>Q81JE21                                                                                                                                                                | ; ERG7_HUMAN                                                                                                                                                                                                                                       |
| 593           | IPI00009960; IPI00554469                                                                                                         | IMMT                | 747                                  | 758         | 753        | 8.3E+04                               | 8.4E+04            | 8.3E+04            | 33.6            | 19                    | 0         | 1         | 0        | 1         | ISOFORM 1 OF MITOCHONDRIAL INNER MEMBRANE PROTEIN.; ISOFORM 2 OF MITOCHONDRIAL INNER MEMBRANE PROTEIN.                                                                                                                                                                                                                                                                                                                                                                                                                                       | Q05DN3; Q14539;<br>Q15092; Q16891;<br>Q68D41; Q69HW5;<br>Q6IBL0; Q7Z3X1;<br>Q8TAJ5; Q9P0V2<br>P31150; P50394;<br>Q6FG50; Q7ZZG6;<br>Q7ZZG9; Q7ZZH5;                                                         | IMMT_HUMAN; Q05DN3_HUMAN                                                                                                                                                                                                                           |
| 594           | IPI00010154                                                                                                                      | GD1                 | 447                                  | 447         | 447        | 5.1E+04                               | 5.1E+04            | 5.1E+04            | 23.5            | 7                     | 1         | 1         | 0        | 1         | RAB GDP DISSOCIATION INHIBITOR ALPHA.                                                                                                                                                                                                                                                                                                                                                                                                                                                                                                        | Q7Z2I6                                                                                                                                                                                                      | GDIA_HUMAN; Q6FG50_HUMAN                                                                                                                                                                                                                           |
| 595           | IPI00010402                                                                                                                      | SP3BGR3             | 226                                  | 226         | 226        | 2.4E+04                               | 2.4E+04            | 2.4E+04            | 8.4             | 2                     | 0         | 0         | 0        | 1         | HYPOTHETICAL PROTEIN.                                                                                                                                                                                                                                                                                                                                                                                                                                                                                                                        | Q86Z22                                                                                                                                                                                                      | Q86Z22_HUMAN                                                                                                                                                                                                                                       |
| 596           | IPI00010740                                                                                                                      | SFPQ                | 707                                  | 707         | 707        | 7.6E+04                               | 7.6E+04            | 7.6E+04            | 3.7             | 2                     | 0         | 0         | 0        | 1         | ISOFORM LONG OF SPLICING FACTOR, PROLINE- AND GLUTAMINE-RICH.                                                                                                                                                                                                                                                                                                                                                                                                                                                                                | P23246; P30808;<br>Q5SZ71; Q6PIX2;<br>Q86VG2; Q8BSV4                                                                                                                                                        | ; Q5SZ71_HUMAN; Q6PIX2_HUMAN;<br>Q86VG2_HUMAN; Q8BSV4_HUMAN;<br>SFPQ_HUMAN                                                                                                                                                                         |
| 597           | IPI00010845                                                                                                                      | NDUFS8              | 210                                  | 210         | 210        | 2.4E+04                               | 2.4E+04            | 2.4E+04            | 15.2            | 3                     | 0         | 0         | 0        | 1         | NADH DEHYDROGENASE [UBIQUINONE] IRON-SULFUR PROTEIN 8, MITOCHONDRIALPRECURSOR.                                                                                                                                                                                                                                                                                                                                                                                                                                                               | Q00217; Q08E91;<br>Q0VDA8; Q53G17                                                                                                                                                                           | NDUS8_HUMAN; Q08E91_HUMAN;<br>Q53G17_HUMAN                                                                                                                                                                                                         |
| 598           | IPI00011217                                                                                                                      | NDUFS4              | 175                                  | 175         | 175        | 2.0E+04                               | 2.0E+04            | 2.0E+04            | 14.9            | 2                     | 0         | 0         | 0        | 1         | NADH DEHYDROGENASE [UBIQUINONE] IRON-SULFUR PROTEIN 4, MITOCHONDRIALPRECURSOR.                                                                                                                                                                                                                                                                                                                                                                                                                                                               | Q43181; Q8BS69<br>P23396; Q498B5;<br>Q53G83; Q6IPX9;<br>Q8N195; Q9NQS8<br>Q43242; Q6IBN0;                                                                                                                   | NDUS4_HUMAN                                                                                                                                                                                                                                        |
| 599           | IPI00011253                                                                                                                      | RPS3                | 243                                  | 243         | 243        | 2.7E+04                               | 2.7E+04            | 2.7E+04            | 16.1            | 3                     | 0         | 0         | 0        | 1         | 40S RIBOSOMAL PROTEIN S3.                                                                                                                                                                                                                                                                                                                                                                                                                                                                                                                    | Q8N9M2; Q9E12;<br>Q96N86; Q9BOA4<br>P05218; P07437;<br>Q5JP53; Q5SU16;<br>Q6LC01; Q8WUC1;<br>Q9CY33<br>P07585; Q6FH10;<br>Q9P020; Q9P0Z1;<br>Q9Y5N8; Q9Y5N9<br>Q13203; Q16886;<br>Q88YC5<br>P17075; P60866; | Q53G83_HUMAN; Q6IPX9_HUMAN;<br>Q9NQS8_HUMAN; RS3_HUMAN                                                                                                                                                                                             |
| 600           | IPI00011603                                                                                                                      | PSMD3               | 534                                  | 534         | 534        | 6.1E+04                               | 6.1E+04            | 6.1E+04            | 26.6            | 9                     | 1         | 1         | 0        | 1         | 26S PROTEASOME NON-ATPASE REGULATORY SUBUNIT 3.                                                                                                                                                                                                                                                                                                                                                                                                                                                                                              | Q8N9M2; Q9E12;<br>Q96N86; Q9BOA4<br>P05218; P07437;<br>Q5JP53; Q5SU16;<br>Q6LC01; Q8WUC1;<br>Q9CY33<br>P07585; Q6FH10;<br>Q9P020; Q9P0Z1;<br>Q9Y5N8; Q9Y5N9<br>Q13203; Q16886;<br>Q88YC5<br>P17075; P60866; | PSMD3_HUMAN; Q6IBN0_HUMAN;<br>Q8N9M2_HUMAN; Q96N86_HUMAN                                                                                                                                                                                           |
| 601           | IPI00011654; IPI00645452                                                                                                         | TUBB                | 426                                  | 444         | 435        | 4.8E+04                               | 5.0E+04            | 4.9E+04            | 51.1            | 19                    | 1         | 1         | 0        | 1         | TUBULIN BETA CHAIN.; TUBULIN, BETA POLYPEPTIDE.                                                                                                                                                                                                                                                                                                                                                                                                                                                                                              | Q5JP53; Q5SU16;<br>Q6LC01_HUMAN; TB85_HUMAN                                                                                                                                                                 | Q5JP53_HUMAN; Q5SU16_HUMAN;<br>Q6LC01_HUMAN; TB85_HUMAN                                                                                                                                                                                            |
| 602           | IPI00012119; IPI00794413; IPI00795042                                                                                            | DCN                 | 179                                  | 359         | 252        | 2.0E+04                               | 4.0E+04            | 2.8E+04            | 20.7            | 4                     | 1         | 1         | 0        | 1         | ISOFORM A OF DECORIN PRECURSOR.; 20 KDA PROTEIN.; 24 KDA PROTEIN.                                                                                                                                                                                                                                                                                                                                                                                                                                                                            | Q9P020; Q9P0Z1;<br>Q9Y5N8; Q9Y5N9<br>Q13203; Q16886;<br>Q88YC5<br>P17075; P60866;                                                                                                                           | ; PGS2_HUMAN; Q6FH10_HUMAN                                                                                                                                                                                                                         |
| 603           | IPI00012272                                                                                                                      | MYBPH               | 477                                  | 477         | 477        | 5.2E+04                               | 5.2E+04            | 5.2E+04            | 21.6            | 7                     | 1         | 1         | 0        | 1         | MYOSIN-BINDING PROTEIN H.                                                                                                                                                                                                                                                                                                                                                                                                                                                                                                                    | Q88YC5<br>P17075; P60866;                                                                                                                                                                                   | MYBPH_HUMAN                                                                                                                                                                                                                                        |
| 604           | IPI00012493; IPI00794659                                                                                                         | RPS20               | 119                                  | 142         | 131        | 1.3E+04                               | 1.6E+04            | 1.5E+04            | 10.6            | 2                     | 0         | 0         | 0        | 1         | 40S RIBOSOMAL PROTEIN S20.; 16 KDA PROTEIN.                                                                                                                                                                                                                                                                                                                                                                                                                                                                                                  | Q5M859                                                                                                                                                                                                      | ; RS20_HUMAN                                                                                                                                                                                                                                       |
| 605           | IPI00013297                                                                                                                      | PDAP1               | 181                                  | 181         | 181        | 2.1E+04                               | 2.1E+04            | 2.1E+04            | 13.3            | 2                     | 0         | 0         | 0        | 1         | 28 KDA HEAT- AND ACID-STABLE PHOSPHOPROTEIN.                                                                                                                                                                                                                                                                                                                                                                                                                                                                                                 | Q13442; Q92906<br>A0AV49; Q05BP6;<br>Q05DF8; Q3KQZ8;<br>Q5DSM1; Q5H9S5;<br>Q6PD57; Q86X73<br>A0AVD3; Q43667;<br>P30622; Q17RS4;<br>Q29RG0; Q6PSZ9;<br>Q6Q318                                                | HAP28_HUMAN<br>A0AV49_HUMAN; Q05BP6_HUMAN;<br>Q05DF8_HUMAN; Q3KQZ8_HUMAN;<br>Q5DSM1_HUMAN; Q5H9S5_HUMAN;<br>Q6PD57_HUMAN; Q86X73_HUMAN<br>A0AVD3_HUMAN; CLIP1_HUMAN;<br>Q43667_HUMAN; Q17RS4_HUMAN;<br>Q29RG0_HUMAN; Q6PSZ9_HUMAN;<br>Q6Q318_HUMAN |
| 606           | IPI00013452                                                                                                                      | EPRS                | 1512                                 | 1512        | 1512       | 1.7E+05                               | 1.7E+05            | 1.7E+05            | 1.7             | 2                     | 0         | 0         | 0        | 1         | GLUTAMYL-PROLYL TRNA SYNTHETASE.                                                                                                                                                                                                                                                                                                                                                                                                                                                                                                             | Q6PD57; Q86X73<br>A0AVD3; Q43667;<br>P30622; Q17RS4;<br>Q29RG0; Q6PSZ9;<br>Q6Q318                                                                                                                           | Q6PD57_HUMAN; Q86X73_HUMAN<br>A0AVD3_HUMAN; CLIP1_HUMAN;<br>Q43667_HUMAN; Q17RS4_HUMAN;<br>Q29RG0_HUMAN; Q6PSZ9_HUMAN;<br>Q6Q318_HUMAN                                                                                                             |
| 607           | IPI00013455; IPI00021712; IPI00217113                                                                                            | CLIP1               | 1392                                 | 1438        | 1419       | 1.6E+05                               | 1.6E+05            | 1.6E+05            | 3.5             | 4                     | 0         | 0         | 0        | 1         | CLIP1 PROTEIN.; ISOFORM LONG OF CAP-GLY DOMAIN-CONTAINING LINKER PROTEIN 1.; ISOFORM SHORT OF CAP-GLY DOMAIN-CONTAINING LINKER PROTEIN 1.                                                                                                                                                                                                                                                                                                                                                                                                    | Q43707; Q76048;<br>Q96BG6                                                                                                                                                                                   | ; Q76M58_HUMAN; RS12_HUMAN                                                                                                                                                                                                                         |
| 608           | IPI00013808                                                                                                                      | ACTN4               | 911                                  | 911         | 911        | 1.0E+05                               | 1.0E+05            | 1.0E+05            | 9.6             | 6                     | 0         | 0         | 0        | 1         | ALPHA-ACTININ-4.                                                                                                                                                                                                                                                                                                                                                                                                                                                                                                                             | Q43707; Q76048;<br>Q96BG6                                                                                                                                                                                   | ACTN4_HUMAN; Q96BG6_HUMAN                                                                                                                                                                                                                          |
| 609           | IPI00013917; IPI00456898                                                                                                         | LOC440055;<br>RPS12 | 132                                  | 132         | 132        | 1.5E+04                               | 1.5E+04            | 1.5E+04            | 13.6            | 2                     | 0         | 0         | 0        | 1         | 40S RIBOSOMAL PROTEIN S12.; SIMILAR TO RIBOSOMAL PROTEIN S12.                                                                                                                                                                                                                                                                                                                                                                                                                                                                                | P25398; Q76M58                                                                                                                                                                                              | ; Q76M58_HUMAN; RS12_HUMAN                                                                                                                                                                                                                         |
| 610           | IPI00014230; IPI00794855                                                                                                         | C1QBP               | 225                                  | 282         | 254        | 2.5E+04                               | 3.1E+04            | 2.8E+04            | 9.6             | 2                     | 0         | 1         | 0        | 1         | COMPLEMENT COMPONENT 1 Q SUBCOMPONENT-BINDING PROTEIN, MITOCHONDRIALPRECURSOR.; 25 KDA PROTEIN.                                                                                                                                                                                                                                                                                                                                                                                                                                              | Q07021; Q2HXR8;<br>Q9NNY8<br>Q60719; Q08AL6;<br>Q13616; Q75MQ1;<br>Q81YW1<br>Q75415; Q13618;<br>Q53RD1; Q53S54;<br>Q569L3; Q9UB18;<br>Q9UET7                                                                | ; C1QBP_HUMAN                                                                                                                                                                                                                                      |
| 611           | IPI00014310                                                                                                                      | CUL1                | 776                                  | 776         | 776        | 9.0E+04                               | 9.0E+04            | 9.0E+04            | 11.9            | 5                     | 1         | 1         | 0        | 1         | CULLIN-1.                                                                                                                                                                                                                                                                                                                                                                                                                                                                                                                                    | Q07021; Q2HXR8;<br>Q9NNY8<br>Q60719; Q08AL6;<br>Q13616; Q75MQ1;<br>Q81YW1<br>Q75415; Q13618;<br>Q53RD1; Q53S54;<br>Q569L3; Q9UB18;<br>Q9UET7                                                                | CUL1_HUMAN; Q75MQ1_HUMAN                                                                                                                                                                                                                           |
| 612           | IPI00014312; IPI00382458; IPI00382459                                                                                            | CUL3                | 702                                  | 768         | 738        | 8.1E+04                               | 8.9E+04            | 8.5E+04            | 7.8             | 4                     | 1         | 1         | 0        | 1         | ISOFORM 1 OF CULLIN-3.; ISOFORM 2 OF CULLIN-3.; ISOFORM 3 OF CULLIN-3.                                                                                                                                                                                                                                                                                                                                                                                                                                                                       | Q07021; Q2HXR8;<br>Q9NNY8<br>Q60719; Q08AL6;<br>Q13616; Q75MQ1;<br>Q81YW1<br>Q75415; Q13618;<br>Q53RD1; Q53S54;<br>Q569L3; Q9UB18;<br>Q9UET7                                                                | CUL3_HUMAN; Q53RD1_HUMAN;<br>Q53S54_HUMAN                                                                                                                                                                                                          |

| Protein Group <sup>a</sup> | IPI ID                                                                       | IPI gene name | Amino Acids in Sequence <sup>b</sup> |      |      | Protein Molecular Weight <sup>c</sup> |         |         | Seq. Cov. (max) | Unique Peptides (max) | Detection |           |          |           | Protein name                                                                                                                                   | Uniprot Id                                                                                                                                                                                                                                                                                                                                                                                                                                                                                           | Uniprot Entry Name                                                                                                        |
|----------------------------|------------------------------------------------------------------------------|---------------|--------------------------------------|------|------|---------------------------------------|---------|---------|-----------------|-----------------------|-----------|-----------|----------|-----------|------------------------------------------------------------------------------------------------------------------------------------------------|------------------------------------------------------------------------------------------------------------------------------------------------------------------------------------------------------------------------------------------------------------------------------------------------------------------------------------------------------------------------------------------------------------------------------------------------------------------------------------------------------|---------------------------------------------------------------------------------------------------------------------------|
|                            |                                                                              |               | Min.                                 | Max. | Mean | Min.                                  | Max.    | Mean    |                 |                       | Expt. I-1 | Expt. I-2 | Expt. II | Expt. III |                                                                                                                                                |                                                                                                                                                                                                                                                                                                                                                                                                                                                                                                      |                                                                                                                           |
| 613                        | IPI00017030; IPI00402167; IPI00477329; IPI00760846; IPI00760925; IPI00828082 | MYO18A; TIAF1 | 2002                                 | 2057 | 2033 | 2.3E+05                               | 2.3E+05 | 2.3E+05 | 1.6             | 2                     | 0         | 0         | 0        | 1         | 234 KDA PROTEIN.; 232 KDA PROTEIN.; 227 KDA PROTEIN.; ISOFORM 1 OF MYOSIN-XVIII.A.; ISOFORM 3 OF MYOSIN-XVIII.A.; ISOFORM 4 OF MYOSIN-XVIII.A. | Q5H9J3; Q5QD01; Q5W9F9; Q5W9G1; Q81XP8; Q92614; Q9NYE8 P35239; P35277; P61020; Q6FI54; Q6PIK9; Q86TH0; Q8IXL2 P00450; Q14063; Q1L857; Q2PP18; Q6NSB2; Q9UKS4                                                                                                                                                                                                                                                                                                                                         | : MY18A_HUMAN; Q5QD01_HUMAN; Q9NYE8_HUMAN                                                                                 |
| 614                        | IPI00017344                                                                  | RAB5B         | 215                                  | 215  | 215  | 2.4E+04                               | 2.4E+04 | 2.4E+04 | 14.0            | 2                     | 0         | 0         | 0        | 1         | RAS-RELATED PROTEIN RAB-5B.                                                                                                                    | Q6FI54_HUMAN; RAB5B_HUMAN                                                                                                                                                                                                                                                                                                                                                                                                                                                                            |                                                                                                                           |
| 615                        | IPI00017601                                                                  | CP            | 1065                                 | 1065 | 1065 | 1.2E+05                               | 1.2E+05 | 1.2E+05 | 11.9            | 9                     | 0         | 1         | 0        | 1         | CERULOPLASMIN PRECURSOR.                                                                                                                       | CERU_HUMAN; Q1L857_HUMAN; Q6NSB2_HUMAN                                                                                                                                                                                                                                                                                                                                                                                                                                                               |                                                                                                                           |
| 616                        | IPI00017672                                                                  | NP            | 293                                  | 293  | 293  | 3.3E+04                               | 3.3E+04 | 3.3E+04 | 14.7            | 3                     | 0         | 0         | 0        | 1         | CDNA FLJ25678 FIS, CLONE TST04067, HIGHLY SIMILAR TO PURINE NUCLEOSIDEPHOSPHORYLASE.                                                           | Q8N7G1; Q9P1G4 Q53FR4; Q561W2; Q5HYM2; Q96QK1; Q9H016; Q9H096; Q9H4P3; Q9H8J0; Q9NR57; Q9NVG2; Q9NX80; Q9NZK2 P10113; P62834; Q5QPH6; Q5U0C3 P00747; Q15146; Q5TEH4; Q68DS2; Q6PA00; Q9UMI2 Q15006; P00751; Q29944; Q53F89; Q5JP67; Q5ST50; Q96HX6; Q9BTF5; Q9BX92 P35613; Q54A51; Q7Z796; Q8IZL7 P257144; Q5VZU8; Q5VZU9                                                                                                                                                                            | Q8N7G1_HUMAN; Q9P1G4_HUMAN                                                                                                |
| 617                        | IPI00018931                                                                  | VPS35         | 796                                  | 796  | 796  | 9.2E+04                               | 9.2E+04 | 9.2E+04 | 12.2            | 7                     | 1         | 1         | 0        | 1         | VACUOLAR PROTEIN SORTING-ASSOCIATED PROTEIN 35.                                                                                                | Q53FR4_HUMAN; Q5HYM2_HUMAN; VPS35_HUMAN                                                                                                                                                                                                                                                                                                                                                                                                                                                              |                                                                                                                           |
| 618                        | IPI00019345; IPI00640287                                                     | RAP1A         | 184                                  | 184  | 184  | 2.1E+04                               | 2.1E+04 | 2.1E+04 | 14.1            | 2                     | 0         | 0         | 0        | 1         | RAS-RELATED PROTEIN RAP-1A PRECURSOR.; RAP1A, MEMBER OF RAS ONCOGENE FAMILY.                                                                   | Q5QPH6_HUMAN; Q5U0C3_HUMAN; RAP1A_HUMAN                                                                                                                                                                                                                                                                                                                                                                                                                                                              |                                                                                                                           |
| 619                        | IPI00019580                                                                  | PLG           | 810                                  | 810  | 810  | 9.1E+04                               | 9.1E+04 | 9.1E+04 | 3.8             | 3                     | 0         | 0         | 0        | 1         | PLASMINOGEN PRECURSOR.                                                                                                                         | PLMN_HUMAN; Q68DS2_HUMAN; Q9UMI2_HUMAN                                                                                                                                                                                                                                                                                                                                                                                                                                                               |                                                                                                                           |
| 620                        | IPI00019591; IPI00639937                                                     | CFB           | 764                                  | 764  | 764  | 8.6E+04                               | 8.6E+04 | 8.6E+04 | 3.3             | 2                     | 0         | 0         | 0        | 1         | ISOFORM 1 OF COMPLEMENT FACTOR B PRECURSOR (FRAGMENT.); B-FACTOR, PROPERDIN.                                                                   | CFAB_HUMAN; Q53F89_HUMAN; Q5JP67_HUMAN                                                                                                                                                                                                                                                                                                                                                                                                                                                               |                                                                                                                           |
| 621                        | IPI00019906; IPI00218019; IPI00795150                                        | BSG           | 269                                  | 432  | 362  | 2.9E+04                               | 4.6E+04 | 3.9E+04 | 11.9            | 2                     | 0         | 1         | 0        | 1         | ISOFORM 2 OF BASIGIN PRECURSOR.; ISOFORM 1 OF BASIGIN PRECURSOR.; 46 KDA PROTEIN.                                                              | : BASI_HUMAN; Q54A51_HUMAN                                                                                                                                                                                                                                                                                                                                                                                                                                                                           |                                                                                                                           |
| 622                        | IPI00020416; IPI00640197                                                     | TPP2          | 1249                                 | 1262 | 1256 | 1.4E+05                               | 1.4E+05 | 1.4E+05 | 3.0             | 3                     | 0         | 1         | 0        | 1         | TRIPEPTIDYL-PEPTIDASE 2.; TRIPEPTIDYL PEPTIDASE II.                                                                                            | Q5VZU8_HUMAN; Q5VZU9_HUMAN; TPP2_HUMAN                                                                                                                                                                                                                                                                                                                                                                                                                                                               |                                                                                                                           |
| 623                        | IPI00020898                                                                  | RPS6KA3       | 740                                  | 740  | 740  | 8.4E+04                               | 8.4E+04 | 8.4E+04 | 7.4             | 4                     | 1         | 1         | 0        | 1         | RIBOSOMAL PROTEIN S6 KINASE ALPHA-3.                                                                                                           | KS6A3_HUMAN; Q7Z2J3_HUMAN; Q7Z2J4_HUMAN                                                                                                                                                                                                                                                                                                                                                                                                                                                              |                                                                                                                           |
| 624                        | IPI00020987                                                                  | PRELP         | 382                                  | 382  | 382  | 4.4E+04                               | 4.4E+04 | 4.4E+04 | 15.7            | 5                     | 0         | 0         | 0        | 1         | PROLARGIN PRECURSOR.                                                                                                                           | PRELP_HUMAN; Q6FG38_HUMAN; Q6FHG6_HUMAN; Q7Z4B2_HUMAN                                                                                                                                                                                                                                                                                                                                                                                                                                                |                                                                                                                           |
| 625                        | IPI00021439; IPI00021440                                                     | ACTB; ACTG1   | 375                                  | 375  | 375  | 4.2E+04                               | 4.2E+04 | 4.2E+04 | 53.1            | 26                    | 1         | 1         | 0        | 1         | ACTIN, CYTOPLASMIC 1.; ACTIN, CYTOPLASMIC 2.                                                                                                   | A1E282_HUMAN; ACTB_HUMAN; ACTG_HUMAN; Q1KLZ0_HUMAN; Q53G76_HUMAN; Q53G99_HUMAN; Q53GK6_HUMAN; Q562L3_HUMAN; Q562L5_HUMAN; Q562L6_HUMAN; Q562L9_HUMAN; Q562M3_HUMAN; Q562M5_HUMAN; Q562N0_HUMAN; Q562N2_HUMAN; Q562N8_HUMAN; Q562P0_HUMAN; Q562R8_HUMAN; Q562S0_HUMAN; Q562U1_HUMAN; Q562U2_HUMAN; Q562V5_HUMAN; Q562X2_HUMAN; Q562X9_HUMAN; Q562Y6_HUMAN; Q562Z4_HUMAN; Q562Z6_HUMAN; Q562Z7_HUMAN; Q5U032_HUMAN; Q96H5; Q9UE89; Q9UMN3 P02549; Q13791; Q6LA97; Q6LBZ1; Q8TC28; Q9P254 P02652 P02743 | Q8WVW5_HUMAN; Q96HG5_HUMAN; Q9UE89_HUMAN; Q9UMN3_HUMAN APOE_HUMAN; Q13791_HUMAN; Q6LA97_HUMAN; Q6LBZ1_HUMAN; Q8TC28_HUMAN |
| 626                        | IPI00021842                                                                  | APOE          | 317                                  | 317  | 317  | 3.6E+04                               | 3.6E+04 | 3.6E+04 | 28.4            | 7                     | 0         | 0         | 0        | 1         | APOLIPOPROTEIN E PRECURSOR.                                                                                                                    | APOE_HUMAN                                                                                                                                                                                                                                                                                                                                                                                                                                                                                           |                                                                                                                           |
| 627                        | IPI00021854                                                                  | APOA2         | 100                                  | 100  | 100  | 1.1E+04                               | 1.1E+04 | 1.1E+04 | 21.0            | 2                     | 0         | 0         | 0        | 1         | APOLIPOPROTEIN A-II PRECURSOR.                                                                                                                 | APOA2_HUMAN                                                                                                                                                                                                                                                                                                                                                                                                                                                                                          |                                                                                                                           |
| 628                        | IPI00022391                                                                  | APCS          | 223                                  | 223  | 223  | 2.5E+04                               | 2.5E+04 | 2.5E+04 | 9.0             | 2                     | 0         | 0         | 0        | 1         | SERUM AMYLOID P-COMPONENT PRECURSOR.                                                                                                           | SAMP_HUMAN                                                                                                                                                                                                                                                                                                                                                                                                                                                                                           |                                                                                                                           |



| Protein Group* | IPI ID                                                                                                                                                                                                                                   | IPI gene name     | Amino Acids in Sequence <sup>1</sup> |      |      | Protein Molecular Weight <sup>1</sup> |         |         | Seq. Cov. (max) | Unique Peptides (max) | Detection |           |          |           | Protein name                                                                                                                                                                                                                                                                                                                                                                                                                                                                                        | Uniprot Id                                                                     | Uniprot Entry Name                                   |
|----------------|------------------------------------------------------------------------------------------------------------------------------------------------------------------------------------------------------------------------------------------|-------------------|--------------------------------------|------|------|---------------------------------------|---------|---------|-----------------|-----------------------|-----------|-----------|----------|-----------|-----------------------------------------------------------------------------------------------------------------------------------------------------------------------------------------------------------------------------------------------------------------------------------------------------------------------------------------------------------------------------------------------------------------------------------------------------------------------------------------------------|--------------------------------------------------------------------------------|------------------------------------------------------|
|                |                                                                                                                                                                                                                                          |                   | Min.                                 | Max. | Mean | Min.                                  | Max.    | Mean    |                 |                       | Expt. I-1 | Expt. I-2 | Expt. II | Expt. III |                                                                                                                                                                                                                                                                                                                                                                                                                                                                                                     |                                                                                |                                                      |
| 654            | IPI00030531; IPI00791574; IPI00794566                                                                                                                                                                                                    | SLMAP             | 790                                  | 828  | 810  | 9.1E+04                               | 9.5E+04 | 9.3E+04 | 5.1             | 2                     | 0         | 0         | 0        | 1         | ISOFORM 3 OF SARCOLEMMA MEMBRANE-ASSOCIATED PROTEIN.; ISOFORM 1 OF SARCOLEMMA MEMBRANE-ASSOCIATED PROTEIN.; ISOFORM 2 OF SARCOLEMMA MEMBRANE-ASSOCIATED PROTEIN.                                                                                                                                                                                                                                                                                                                                    | Q14BN4; Q14C95; Q6A154; Q6UXC9; Q6ZV08; Q8N0W9; Q9H297; Q9HC11; Q9Y681         | SLMAP_HUMAN                                          |
| 655            | IPI00030929; IPI00220278                                                                                                                                                                                                                 | MYL9              | 118                                  | 172  | 145  | 1.4E+04                               | 2.0E+04 | 1.7E+04 | 17.8            | 2                     | 0         | 0         | 0        | 1         | MYOSIN REGULATORY LIGHT CHAIN 9 ISOFORM B.; MYOSIN REGULATORY LIGHT CHAIN 2, SMOOTH MUSCLE ISOFORM.                                                                                                                                                                                                                                                                                                                                                                                                 | P24844; Q6IBG1; Q71U02; Q9BQL9; Q9BUB9; Q9H136                                 | MLRN_HUMAN; Q6IBG1_HUMAN; Q71U02_HUMAN; Q9BUB9_HUMAN |
| 656            | IPI00031564                                                                                                                                                                                                                              | C7orf24           | 188                                  | 188  | 188  | 2.1E+04                               | 2.1E+04 | 2.1E+04 | 10.6            | 2                     | 0         | 0         | 0        | 1         | UNCHARACTERIZED PROTEIN C7ORF24.                                                                                                                                                                                                                                                                                                                                                                                                                                                                    | O75223                                                                         | CG024_HUMAN                                          |
| 657            | IPI00032633                                                                                                                                                                                                                              | COQ6              | 468                                  | 468  | 468  | 5.1E+04                               | 5.1E+04 | 5.1E+04 | 13.9            | 6                     | 1         | 1         | 0        | 1         | UBIQUINONE BIOSYNTHESIS MONOOXYGENASE COQ6.                                                                                                                                                                                                                                                                                                                                                                                                                                                         | Q53GG6; Q96CA1; Q96CK2; Q9Y2Z9; P59550; P63279; Q15698; Q59GX1; Q7KZS0; Q86VB3 | COQ6_HUMAN; Q53GG6_HUMAN                             |
| 658            | IPI00032957; IPI00450472                                                                                                                                                                                                                 | UBE2I             | 158                                  | 184  | 171  | 1.8E+04                               | 2.0E+04 | 1.9E+04 | 16.5            | 2                     | 0         | 0         | 0        | 1         | SUMO-CONJUGATING ENZYME UBC9.; UBIQUITIN-CONJUGATING ENZYME E2I.                                                                                                                                                                                                                                                                                                                                                                                                                                    | Q5M7Z5; Q5T945; Q9H3E9; Q9UBQ7; Q9UKX1                                         | Q7KZS0_HUMAN; UBC9_HUMAN                             |
| 659            | IPI00037448; IPI00550682                                                                                                                                                                                                                 | GRHPR             | 328                                  | 341  | 335  | 3.6E+04                               | 3.7E+04 | 3.6E+04 | 32.6            | 8                     | 1         | 1         | 0        | 1         | GLYOXYLATE REDUCTASE/HYDROXYPYRUVATE REDUCTASE.; GRHPR PROTEIN (FRAGMENT). ISOFORM 1 OF APOLIPOPROTEIN O PRECURSOR.; 13 KDA PROTEIN.; ISOFORM 2 OF APOLIPOPROTEIN O PRECURSOR.                                                                                                                                                                                                                                                                                                                      | Q9H3E9; Q9UBQ7; Q9UKX1                                                         | GRHPR_HUMAN; Q5M7Z5_HUMAN; Q5T945_HUMAN              |
| 660            | IPI00042580; IPI00647123; IPI00797546                                                                                                                                                                                                    | APOO              | 114                                  | 198  | 164  | 1.3E+04                               | 2.2E+04 | 1.9E+04 | 13.1            | 2                     | 0         | 0         | 0        | 1         | ISOFORM 1 OF UBIQUITIN CARBOXYL-TERMINAL HYDROLASE 28.                                                                                                                                                                                                                                                                                                                                                                                                                                              | Q9BUR5; Q9H3J9                                                                 | APOO_HUMAN                                           |
| 661            | IPI00045496                                                                                                                                                                                                                              | USP28             | 1077                                 | 1077 | 1077 | 1.2E+05                               | 1.2E+05 | 1.2E+05 | 2.0             | 2                     | 0         | 0         | 0        | 1         | ISOFORM 1 OF PROTEIN COQ10 A, MITOCHONDRIAL PRECURSOR.; COQ10A PROTEIN.; ISOFORM 2 OF PROTEIN COQ10 A, MITOCHONDRIAL PRECURSOR. ISOFORM 1 OF NUCLEOLAR PROTEIN 3.                                                                                                                                                                                                                                                                                                                                   | Q96RU2; Q9P213 Q96MR6; Q9UWB9; Q86X16; Q8TAL2; Q96MF1; Q96MF6; Q9BUP4          | UBP28_HUMAN                                          |
| 662            | IPI00065495; IPI00152070; IPI00736624                                                                                                                                                                                                    | COQ10A            | 215                                  | 247  | 231  | 2.4E+04                               | 2.8E+04 | 2.6E+04 | 7.7             | 2                     | 0         | 0         | 0        | 1         | ISOFORM 1 OF NUCLEOLAR PROTEIN 3.                                                                                                                                                                                                                                                                                                                                                                                                                                                                   | Q60936; Q60937 Q496C9; Q496D1; Q5W184; Q8TEA8; Q8WXU8; Q9BW67; Q9H464; Q9H474  | COQ10A_HUMAN; Q8TAL2_HUMAN                           |
| 663            | IPI00105916                                                                                                                                                                                                                              | NOL3              | 219                                  | 219  | 219  | 2.4E+04                               | 2.4E+04 | 2.4E+04 | 12.3            | 2                     | 0         | 0         | 0        | 1         | ISOFORM 1 OF NUCLEOLAR PROTEIN 3.                                                                                                                                                                                                                                                                                                                                                                                                                                                                   | Q496C9; Q496D1; Q5W184; Q8TEA8; Q8WXU8; Q9BW67; Q9H464; Q9H474                 | NOL3_HUMAN                                           |
| 664            | IPI00152692; IPI00829870                                                                                                                                                                                                                 | DTD1; HARS2       | 209                                  | 209  | 209  | 2.3E+04                               | 2.3E+04 | 2.3E+04 | 14.8            | 2                     | 0         | 0         | 0        | 1         | PROBABLE D-TYROSYL-TRNA(TYR) DEACYLASE 1.; HISTIDYL-TRNA SYNTHETASE 2.                                                                                                                                                                                                                                                                                                                                                                                                                              | Q9H464; Q9H474                                                                 | DTD1_HUMAN; Q496C9_HUMAN                             |
| 665            | IPI00157790                                                                                                                                                                                                                              | KIAA0368          | 2017                                 | 2017 | 2017 | 2.2E+05                               | 2.2E+05 | 2.2E+05 | 1.9             | 3                     | 0         | 0         | 0        | 1         | KIAA0368 PROTEIN.                                                                                                                                                                                                                                                                                                                                                                                                                                                                                   | Q96GD1                                                                         |                                                      |
| 666            | IPI00168620                                                                                                                                                                                                                              | ADPRHL1           | 354                                  | 354  | 354  | 4.0E+04                               | 4.0E+04 | 4.0E+04 | 16.4            | 6                     | 1         | 1         | 0        | 1         | ISOFORM 1 OF [PROTEIN ADP-RIBOSYLARGININE] HYDROLASE-LIKE PROTEIN 1.                                                                                                                                                                                                                                                                                                                                                                                                                                | Q5JUG2; Q8NDY3; Q96GD1                                                         | ARHL1_HUMAN                                          |
| 667            | IPI00171844                                                                                                                                                                                                                              | COPSA4            | 406                                  | 406  | 406  | 4.6E+04                               | 4.6E+04 | 4.6E+04 | 31.0            | 8                     | 1         | 1         | 0        | 1         | COPI9 SIGNALOSOME COMPLEX SUBUNIT 4.                                                                                                                                                                                                                                                                                                                                                                                                                                                                | Q9Y677                                                                         | CSN4_HUMAN; Q53FV3_HUMAN                             |
| 668            | IPI00180408                                                                                                                                                                                                                              | MYH15             | 1946                                 | 1946 | 1946 | 2.2E+05                               | 2.2E+05 | 2.2E+05 | 1.5             | 5                     | 0         | 0         | 0        | 1         | MYOSIN-15.                                                                                                                                                                                                                                                                                                                                                                                                                                                                                          | Q9Y2K3                                                                         | MYH15_HUMAN                                          |
| 669            | IPI00215719                                                                                                                                                                                                                              | RPL18             | 188                                  | 188  | 188  | 2.2E+04                               | 2.2E+04 | 2.2E+04 | 13.8            | 2                     | 0         | 0         | 0        | 1         | 60S RIBOSOMAL PROTEIN L18.                                                                                                                                                                                                                                                                                                                                                                                                                                                                          | Q07020; Q0QEW2; Q8W1Z6                                                         | Q0QEW2_HUMAN; RPL18_HUMAN                            |
| 670            | IPI00215894; IPI00789376; IPI00797833                                                                                                                                                                                                    | KNG1              | 291                                  | 427  | 382  | 3.3E+04                               | 4.8E+04 | 4.3E+04 | 4.9             | 2                     | 0         | 0         | 0        | 1         | ISOFORM LMW OF KININOGEN-1 PRECURSOR.; KNG1 PROTEIN.; KININOGEN 1.                                                                                                                                                                                                                                                                                                                                                                                                                                  | P01042; P01043; Q05CF8; Q53E00; Q6PAU9                                         | KNG1_HUMAN; Q05CF8_HUMAN; Q53E00_HUMAN; Q6PAU9_HUMAN |
| 671            | IPI00215979                                                                                                                                                                                                                              | BPGM              | 259                                  | 259  | 259  | 3.0E+04                               | 3.0E+04 | 3.0E+04 | 20.1            | 4                     | 0         | 0         | 0        | 1         | BISPHOSPHOGLYCERATE MUTASE.                                                                                                                                                                                                                                                                                                                                                                                                                                                                         | P07738                                                                         | PMGE_HUMAN                                           |
| 672            | IPI00216691                                                                                                                                                                                                                              | PFN1              | 140                                  | 140  | 140  | 1.5E+04                               | 1.5E+04 | 1.5E+04 | 40.0            | 4                     | 1         | 0         | 0        | 1         | PROFILIN-1.                                                                                                                                                                                                                                                                                                                                                                                                                                                                                         | P07737; Q53Y44                                                                 | PROF1_HUMAN; Q53Y44_HUMAN                            |
| 673            | IPI00216697; IPI00297532; IPI00374973; IPI00646300; IPI00654646; IPI00744408; IPI00744946; IPI00744995; IPI00744996; IPI00745246; IPI00745348; IPI00747536; IPI00747552; IPI00748074; IPI00748330; IPI00748439; IPI00748895; IPI00749301 | ANK1              | 1519                                 | 1983 | 1796 | 1.7E+05                               | 2.2E+05 | 2.0E+05 | 5.5             | 7                     | 0         | 1         | 0        | 1         | ISOFORM ER1 OF ANKYRIN-1.; ISOFORM ER2 OF ANKYRIN-1.; ISOFORM ER3 OF ANKYRIN-1.; ISOFORM ER16 OF ANKYRIN-1.; ISOFORM ER5 OF ANKYRIN-1.; ISOFORM ER7 OF ANKYRIN-1.; ISOFORM ER10 OF ANKYRIN-1.; ISOFORM ER6 OF ANKYRIN-1.; ISOFORM ER9 OF ANKYRIN-1.; 207 KDA PROTEIN.; ISOFORM ER4 OF ANKYRIN-1.; ISOFORM ER11 OF ANKYRIN-1.; ISOFORM ER8 OF ANKYRIN-1.; ISOFORM ER15 OF ANKYRIN-1.; ISOFORM BR21 OF ANKYRIN-1.; ISOFORM ER14 OF ANKYRIN-1.; ISOFORM ER13 OF ANKYRIN-1.; ISOFORM ER12 OF ANKYRIN-1. | Q43400; P16157; Q13768; Q59F2; Q8N604; Q99407; Q9UMG4                          | ANK1_HUMAN; Q9UMG4_HUMAN                             |
| 674            | IPI00217960; IPI00396630                                                                                                                                                                                                                 | LOC730418; PRKACA | 343                                  | 351  | 347  | 4.0E+04                               | 4.1E+04 | 4.0E+04 | 29.2            | 8                     | 1         | 1         | 0        | 1         | ISOFORM 2 OF CAMP-DEPENDENT PROTEIN KINASE, ALPHA-CATALYTIC SUBUNIT.; ISOFORM 1 OF CAMP-DEPENDENT PROTEIN KINASE, ALPHA-CATALYTIC SUBUNIT.                                                                                                                                                                                                                                                                                                                                                          | P17612; Q15136; Q32P54; Q9H2Y0; Q9NRB4; Q9NRH9                                 | KAPCA_HUMAN; Q15136_HUMAN; Q32P54_HUMAN              |
| 675            | IPI00218465; IPI00759657                                                                                                                                                                                                                 | PLAA              | 738                                  | 795  | 767  | 8.1E+04                               | 8.7E+04 | 8.4E+04 | 4.0             | 2                     | 0         | 0         | 0        | 1         | PHOSPHOLIPASE A2-ACTIVATING PROTEIN.; PHOSPHOLIPASE A2-ACTIVATING PROTEIN ISOFORM 2.                                                                                                                                                                                                                                                                                                                                                                                                                | Q9Y5L1                                                                         | PLAP_HUMAN                                           |
| 676            | IPI00218728                                                                                                                                                                                                                              | PAFAH1B1          | 410                                  | 410  | 410  | 4.7E+04                               | 4.7E+04 | 4.7E+04 | 11.7            | 3                     | 1         | 1         | 0        | 1         | ISOFORM 1 OF PLATELET-ACTIVATING FACTOR ACETYLDIHYDROLASE IB SUBUNITALPHA.                                                                                                                                                                                                                                                                                                                                                                                                                          | P43034; Q8WZ88; Q8WZ89                                                         | LIS1_HUMAN                                           |
| 677            | IPI00218918                                                                                                                                                                                                                              | ANXA1             | 346                                  | 346  | 346  | 3.9E+04                               | 3.9E+04 | 3.9E+04 | 28.3            | 7                     | 1         | 1         | 0        | 1         | ANNEXIN A1. ISOFORM 2 OF ATP SYNTHASE F CHAIN, MITOCHONDRIAL.; ISOFORM 1 OF ATP SYNTHASE F CHAIN, MITOCHONDRIAL.; ATP SYNTHASE, H+ TRANSPORTING, MITOCHONDRIAL F0 COMPLEX, SUBUNIT F2ISOFORM 2C.; ATP SYNTHASE, H+ TRANSPORTING, MITOCHONDRIAL F0 COMPLEX, SUBUNIT F2ISOFORM 2D.                                                                                                                                                                                                                    | P04083; Q05BR2; Q5TZ29                                                         | ANXA1_HUMAN; Q05BR2_HUMAN; Q5TZ29_HUMAN              |
| 678            | IPI00219291; IPI00220300; IPI00456013;                                                                                                                                                                                                   | ATPSJ2            | 49                                   | 94   | 72   | 5.7E+03                               | 1.1E+04 | 8.3E+03 | 43.6            | 2                     | 0         | 0         | 0        | 1         | ISOFORM 1 OF ATP SYNTHASE F CHAIN, MITOCHONDRIAL.; ATP SYNTHASE, H+ TRANSPORTING, MITOCHONDRIAL F0 COMPLEX, SUBUNIT F2ISOFORM 2C.; ATP SYNTHASE, H+ TRANSPORTING, MITOCHONDRIAL F0 COMPLEX, SUBUNIT F2ISOFORM 2D.                                                                                                                                                                                                                                                                                   | Q76079; P56134; Q53FE1; Q6IBB3; Q96L83; Q9BT18                                 | ATPK_HUMAN; Q53FE1_HUMAN; Q6IBB3_HUMAN               |
| 679            | IPI00219365                                                                                                                                                                                                                              | MSN               | 577                                  | 577  | 577  | 6.8E+04                               | 6.8E+04 | 6.8E+04 | 16.1            | 8                     | 1         | 1         | 0        | 1         | MOESIN.                                                                                                                                                                                                                                                                                                                                                                                                                                                                                             | P26038; Q6PJT4 P27105; Q14087; Q15609; Q5VX95; Q5VX96; Q96FK4                  | MOES_HUMAN; Q6PJT4_HUMAN                             |
| 680            | IPI00219682; IPI00377081                                                                                                                                                                                                                 | STOM              | 123                                  | 288  | 206  | 1.3E+04                               | 3.2E+04 | 2.3E+04 | 16.3            | 3                     | 0         | 0         | 0        | 1         | ERYTHROCYTE BAND 7 INTEGRAL MEMBRANE PROTEIN.; STOMATIN ISOFORM B.                                                                                                                                                                                                                                                                                                                                                                                                                                  | Q5VX96; Q96FK4 P17568; Q6ICN9; Q9UI16                                          | Q5VX95_HUMAN; STOM_HUMAN                             |
| 681            | IPI00219772                                                                                                                                                                                                                              | NDUFB7            | 137                                  | 137  | 137  | 1.6E+04                               | 1.6E+04 | 1.6E+04 | 12.4            | 2                     | 0         | 0         | 0        | 1         | NADH DEHYDROGENASE [UBIQUINONE] 1 BETA SUBCOMPLEX SUBUNIT 7.                                                                                                                                                                                                                                                                                                                                                                                                                                        | Q9UI16                                                                         | NDUB7_HUMAN; Q6ICN9_HUMAN                            |

| Protein Group <sup>a</sup> | IPI ID                                                          | IPI gene name     | Amino Acids in Sequence <sup>b</sup> |      |      | Protein Molecular Weight <sup>c</sup> |         |         | Seq. Cov. (max) | Unique Peptides (max) | Detection |           |          |           | Protein name                                                                                                                                                                                               | Uniprot Id                                                                                                                                                                                                                                             | Uniprot Entry Name                                                                                           |
|----------------------------|-----------------------------------------------------------------|-------------------|--------------------------------------|------|------|---------------------------------------|---------|---------|-----------------|-----------------------|-----------|-----------|----------|-----------|------------------------------------------------------------------------------------------------------------------------------------------------------------------------------------------------------------|--------------------------------------------------------------------------------------------------------------------------------------------------------------------------------------------------------------------------------------------------------|--------------------------------------------------------------------------------------------------------------|
|                            |                                                                 |                   | Min.                                 | Max. | Mean | Min.                                  | Max.    | Mean    |                 |                       | Expt. I-1 | Expt. I-2 | Expt. II | Expt. III |                                                                                                                                                                                                            |                                                                                                                                                                                                                                                        |                                                                                                              |
| 682                        | IPI00220059                                                     | LOC727762; NDUFB4 | 129                                  | 129  | 129  | 1.5E+04                               | 1.5E+04 | 1.5E+04 | 17.1            | 2                     | 0         | 0         | 0        | 1         | NADH DEHYDROGENASE [UBIQUINONE] 1 BETA SUBCOMPLEX SUBUNIT 4.                                                                                                                                               | Q95188; Q93488                                                                                                                                                                                                                                         | NDUB4_HUMAN; Q53H88_HUMAN                                                                                    |
| 683                        | IPI00220303; IPI00793544                                        | DCTN2             | 377                                  | 406  | 392  | 4.2E+04                               | 4.5E+04 | 4.3E+04 | 20.2            | 6                     | 1         | 1         | 0        | 1         | DYNACTIN 2, 42 KDA PROTEIN.                                                                                                                                                                                | P13010; Q027V0; Q4VB05; Q53H77; Q9UCQ0; Q9UCQ1                                                                                                                                                                                                         | KU86_HUMAN; Q027V0_HUMAN; Q53H77_HUMAN                                                                       |
| 684                        | IPI00220834                                                     | XRCC5             | 732                                  | 732  | 732  | 8.3E+04                               | 8.3E+04 | 8.3E+04 | 9.8             | 6                     | 0         | 1         | 0        | 1         | ATP-DEPENDENT DNA HELICASE 2 SUBUNIT 2. HYPOTHETICAL PROTEIN DKFZP781K0743.; 105 KDA PROTEIN.; ISOFORM 1 OF AP-2 COMPLEX SUBUNIT BETA-1.; ISOFORM 2 OF AP-2 COMPLEX SUBUNIT BETA-1.; BETA ADAPTIN SUBUNIT. | P21851; P63010; Q68D10; Q7Z451; Q96EL6; Q96J19                                                                                                                                                                                                         | ; AP2B1_HUMAN; Q68D10_HUMAN; Q7Z451_HUMAN; Q96EL6_HUMAN                                                      |
| 685                        | IPI00220991; IPI00333383; IPI00784156; IPI00784366; IPI00790702 | AP2B1             | 880                                  | 953  | 932  | 9.8E+04                               | 1.1E+05 | 1.0E+05 | 3.5             | 2                     | 0         | 0         | 0        | 1         | NADH DEHYDROGENASE [UBIQUINONE] 1 BETA SUBCOMPLEX SUBUNIT 9.; NADH-UBIQUINONE OXIDOREDUCTASE B22 SUBUNIT.                                                                                                  | Q5JVG7; Q9UC08; Q9UC05; Q9YBM9; Q75369; Q13706; Q59EC2; Q60F7; Q68CT4; Q6MZJ1; Q8WXS9; Q8WXT0; Q8WXT1; Q8WXT2; Q9NRB5; Q9NT26; Q9UEV9                                                                                                                  | NDUB9_HUMAN; Q5JVG7_HUMAN; Q9UC05_HUMAN                                                                      |
| 686                        | IPI00255052; IPI00790752                                        | NDUF9             | 168                                  | 179  | 174  | 2.0E+04                               | 2.2E+04 | 2.1E+04 | 26.8            | 3                     | 0         | 0         | 0        | 1         |                                                                                                                                                                                                            |                                                                                                                                                                                                                                                        |                                                                                                              |
| 687                        | IPI00289334; IPI00382696; IPI00477536; IPI00480131              | FLNB              | 2578                                 | 2602 | 2593 | 2.8E+05                               | 2.8E+05 | 2.8E+05 | 2.9             | 7                     | 0         | 0         | 0        | 1         | ISOFORM 1 OF FILAMIN-B.; ISOFORM 2 OF FILAMIN-B.; FILAMIN B.; 278 KDA PROTEIN.                                                                                                                             | Q00117; Q00118; P12109; Q05B19; Q14040; Q14041; Q16258; Q72645; Q8TBN2; Q9S9A8; P19404; Q6IB76; Q6IPW4; Q6LEN9; Q9BV41; Q9UEH5; P05155; Q16304; Q547W3; Q59E15; Q5UG16; Q96FE0; Q9UC49; Q9UCF9; P19827; P78455; Q01746; Q562G1; Q53XA5; Q92629; Q99644 | ; FLNB_HUMAN; Q60FE7_HUMAN; Q68CT4_HUMAN                                                                     |
| 688                        | IPI00291136                                                     | COL6A1            | 1028                                 | 1028 | 1028 | 1.1E+05                               | 1.1E+05 | 1.1E+05 | 5.1             | 4                     | 0         | 1         | 0        | 1         | COLLAGEN ALPHA-1(VI) CHAIN PRECURSOR.                                                                                                                                                                      | P19404; Q6IB76; Q6IPW4; Q6LEN9; Q9BV41; Q9UEH5; P05155; Q16304; Q547W3; Q59E15; Q5UG16; Q96FE0; Q9UC49; Q9UCF9; P19827; P78455; Q01746; Q562G1; Q53XA5; Q92629; Q99644                                                                                 | CO6A1_HUMAN; Q05BT9_HUMAN; Q8TBN2_HUMAN; NDUV2_HUMAN; Q6IB76_HUMAN; Q6IPW4_HUMAN; Q6LEN9_HUMAN; Q9UEH5_HUMAN |
| 689                        | IPI00291328; IPI00646556; IPI00793910                           | NDUFV2            | 212                                  | 252  | 238  | 2.4E+04                               | 2.8E+04 | 2.6E+04 | 11.3            | 2                     | 1         | 1         | 0        | 1         | PLASMA PROTEASE C1 INHIBITOR PRECURSOR.; SERINE/CYSTEINE PROTEINASE INHIBITOR CLADE G MEMBER 1 SPLICE VARIANT 2(FRAGMENT). INTER-ALPHA-TRYPsin INHIBITOR HEAVY CHAIN H1 PRECURSOR.                         | Q5VVA5; Q00186; Q53FW1; Q5VTL6; Q86YJ3; Q9UPD7; P02675; Q32Q65; Q3KPF2; Q5TCU6; Q89YD0; Q9NZO2; Q9UHH8; Q9UPX3; Q9Y490; Q9H117; Q9NP98; A2RTX1; Q60661; P13533; Q13943; Q14906; Q14907; Q9UQV1                                                         | IC1_HUMAN; Q16304_HUMAN; Q5UG16_HUMAN; Q9UC49_HUMAN; Q9UCF9_HUMAN                                            |
| 690                        | IPI00291866; IPI00556459                                        | SERPING1          | 333                                  | 500  | 417  | 3.7E+04                               | 5.5E+04 | 4.6E+04 | 10.2            | 4                     | 0         | 1         | 0        | 1         | DELTA-SARCOGLYCAN.; DELTA-SARCOGLYCAN ISOFORM 2.                                                                                                                                                           | Q5VVA5; Q00186; Q53FW1; Q5VTL6; Q86YJ3; Q9UPD7; P02675; Q32Q65; Q3KPF2; Q5TCU6; Q89YD0; Q9NZO2; Q9UHH8; Q9UPX3; Q9Y490; Q9H117; Q9NP98; A2RTX1; Q60661; P13533; Q13943; Q14906; Q14907; Q9UQV1                                                         | ITI1_HUMAN                                                                                                   |
| 691                        | IPI00292530                                                     | ITI1              | 911                                  | 911  | 911  | 1.0E+05                               | 1.0E+05 | 1.0E+05 | 5.3             | 3                     | 0         | 0         | 0        | 1         | DELTA-SARCOGLYCAN.; DELTA-SARCOGLYCAN ISOFORM 1.                                                                                                                                                           | Q5VVA5; Q00186; Q53FW1; Q5VTL6; Q86YJ3; Q9UPD7; P02675; Q32Q65; Q3KPF2; Q5TCU6; Q89YD0; Q9NZO2; Q9UHH8; Q9UPX3; Q9Y490; Q9H117; Q9NP98; A2RTX1; Q60661; P13533; Q13943; Q14906; Q14907; Q9UQV1                                                         | ITI1_HUMAN                                                                                                   |
| 692                        | IPI00294216; IPI00373875; IPI00746318                           | SGCD              | 256                                  | 290  | 279  | 2.9E+04                               | 3.2E+04 | 3.1E+04 | 7.2             | 2                     | 0         | 0         | 0        | 1         | DOLYCHYL-DIPHOSPHOOLIGOSACCHARIDE-PROTEIN GLYCOSYLTRANSFERASEPRECURSOR.                                                                                                                                    | Q5VVA5; Q00186; Q53FW1; Q5VTL6; Q86YJ3; Q9UPD7; P02675; Q32Q65; Q3KPF2; Q5TCU6; Q89YD0; Q9NZO2; Q9UHH8; Q9UPX3; Q9Y490; Q9H117; Q9NP98; A2RTX1; Q60661; P13533; Q13943; Q14906; Q14907; Q9UQV1                                                         | Q53XA5_HUMAN; SGCD_HUMAN                                                                                     |
| 693                        | IPI00297084                                                     | DDOST             | 456                                  | 456  | 456  | 5.1E+04                               | 5.1E+04 | 5.1E+04 | 24.6            | 8                     | 1         | 1         | 0        | 1         |                                                                                                                                                                                                            | Q5VVA5                                                                                                                                                                                                                                                 | Q5VVA5_HUMAN                                                                                                 |
| 694                        | IPI00297626                                                     | STXB3             | 592                                  | 592  | 592  | 6.8E+04                               | 6.8E+04 | 6.8E+04 | 3.6             | 2                     | 0         | 0         | 0        | 1         | SYNTAXIN-BINDING PROTEIN 3.                                                                                                                                                                                | Q5VVA5; Q00186; Q53FW1; Q5VTL6; Q86YJ3; Q9UPD7; P02675; Q32Q65; Q3KPF2; Q5TCU6; Q89YD0; Q9NZO2; Q9UHH8; Q9UPX3; Q9Y490; Q9H117; Q9NP98; A2RTX1; Q60661; P13533; Q13943; Q14906; Q14907; Q9UQV1                                                         | Q53FW1_HUMAN; Q5VTL6_HUMAN; STXB3_HUMAN                                                                      |
| 695                        | IPI00298497                                                     | FGB               | 491                                  | 491  | 491  | 5.6E+04                               | 5.6E+04 | 5.6E+04 | 10.6            | 3                     | 1         | 1         | 0        | 1         | FIBRINOGEN BETA CHAIN PRECURSOR.                                                                                                                                                                           | Q5VVA5; Q00186; Q53FW1; Q5VTL6; Q86YJ3; Q9UPD7; P02675; Q32Q65; Q3KPF2; Q5TCU6; Q89YD0; Q9NZO2; Q9UHH8; Q9UPX3; Q9Y490; Q9H117; Q9NP98; A2RTX1; Q60661; P13533; Q13943; Q14906; Q14907; Q9UQV1                                                         | FIBB_HUMAN; Q32Q65_HUMAN                                                                                     |
| 696                        | IPI00298994; IPI00784273                                        | TLN1              | 2541                                 | 2553 | 2547 | 2.7E+05                               | 2.7E+05 | 2.7E+05 | 1.9             | 4                     | 1         | 0         | 0        | 1         | 271 KDA PROTEIN.; TALIN-1.                                                                                                                                                                                 | Q5VVA5; Q00186; Q53FW1; Q5VTL6; Q86YJ3; Q9UPD7; P02675; Q32Q65; Q3KPF2; Q5TCU6; Q89YD0; Q9NZO2; Q9UHH8; Q9UPX3; Q9Y490; Q9H117; Q9NP98; A2RTX1; Q60661; P13533; Q13943; Q14906; Q14907; Q9UQV1                                                         | ; Q53XA5_HUMAN; TLN1_HUMAN                                                                                   |
| 697                        | IPI00300502                                                     | MYOZ1             | 299                                  | 299  | 299  | 3.2E+04                               | 3.2E+04 | 3.2E+04 | 14.4            | 2                     | 0         | 0         | 0        | 1         | MYOZENIN-1.                                                                                                                                                                                                | Q5VVA5; Q00186; Q53FW1; Q5VTL6; Q86YJ3; Q9UPD7; P02675; Q32Q65; Q3KPF2; Q5TCU6; Q89YD0; Q9NZO2; Q9UHH8; Q9UPX3; Q9Y490; Q9H117; Q9NP98; A2RTX1; Q60661; P13533; Q13943; Q14906; Q14907; Q9UQV1                                                         | MYOZ1_HUMAN                                                                                                  |
| 698                        | IPI00302328                                                     | MYH6              | 1939                                 | 1939 | 1939 | 2.2E+05                               | 2.2E+05 | 2.2E+05 | 42.0            | 147                   | 1         | 1         | 0        | 1         | MYOSIN-6.                                                                                                                                                                                                  | Q5VVA5; Q00186; Q53FW1; Q5VTL6; Q86YJ3; Q9UPD7; P02675; Q32Q65; Q3KPF2; Q5TCU6; Q89YD0; Q9NZO2; Q9UHH8; Q9UPX3; Q9Y490; Q9H117; Q9NP98; A2RTX1; Q60661; P13533; Q13943; Q14906; Q14907; Q9UQV1                                                         | A2RTX1_HUMAN; MYH6_HUMAN; Q60661_HUMAN; Q9UQV1_HUMAN                                                         |
| 699                        | IPI00302927                                                     | CCT4              | 539                                  | 539  | 539  | 5.8E+04                               | 5.8E+04 | 5.8E+04 | 21.5            | 9                     | 1         | 1         | 0        | 1         | T-COMPLEX PROTEIN 1 SUBUNIT DELTA. APOLOPROTEIN A-IV PRECURSOR.; SIMILAR TO APOA4                                                                                                                          | Q5VVA5; Q00186; Q53FW1; Q5VTL6; Q86YJ3; Q9UPD7; P02675; Q32Q65; Q3KPF2; Q5TCU6; Q89YD0; Q9NZO2; Q9UHH8; Q9UPX3; Q9Y490; Q9H117; Q9NP98; A2RTX1; Q60661; P13533; Q13943; Q14906; Q14907; Q9UQV1                                                         | TCPD_HUMAN                                                                                                   |
| 700                        | IPI00304273; IPI00784338                                        | APOA4             | 396                                  | 396  | 396  | 4.5E+04                               | 4.5E+04 | 4.5E+04 | 21.2            | 7                     | 1         | 1         | 0        | 1         | PROTEIN.                                                                                                                                                                                                   | Q5VVA5; Q00186; Q53FW1; Q5VTL6; Q86YJ3; Q9UPD7; P02675; Q32Q65; Q3KPF2; Q5TCU6; Q89YD0; Q9NZO2; Q9UHH8; Q9UPX3; Q9Y490; Q9H117; Q9NP98; A2RTX1; Q60661; P13533; Q13943; Q14906; Q14907; Q9UQV1                                                         | APOA4_HUMAN; Q13784_HUMAN                                                                                    |
| 701                        | IPI00304417; IPI00304419; IPI00643978                           | IDH3B             | 383                                  | 389  | 386  | 4.2E+04                               | 4.3E+04 | 4.2E+04 | 18.6            | 5                     | 1         | 1         | 0        | 1         | ISOCITRATE DEHYDROGENASE [NAD] SUBUNIT BETA, MITOCHONDRIAL PRECURSOR.; ISOFORM A OF ISOCITRATE DEHYDROGENASE [NAD] SUBUNIT BETA, MITOCHONDRIAL PRECURSOR.; 42 KDA PROTEIN.                                 | Q5VVA5; Q00186; Q53FW1; Q5VTL6; Q86YJ3; Q9UPD7; P02675; Q32Q65; Q3KPF2; Q5TCU6; Q89YD0; Q9NZO2; Q9UHH8; Q9UPX3; Q9Y490; Q9H117; Q9NP98; A2RTX1; Q60661; P13533; Q13943; Q14906; Q14907; Q9UQV1                                                         | ; IDH3B_HUMAN                                                                                                |
| 702                        | IPI0073454; IPI00220613; IPI00304840                            | COL6A2            | 828                                  | 1019 | 922  | 8.7E+04                               | 1.1E+05 | 9.8E+04 | 4.4             | 4                     | 0         | 1         | 0        | 1         | ISOFORM 2C2A' OF COLLAGEN ALPHA-2(VI) CHAIN PRECURSOR.; ISOFORM 2C2A OF COLLAGEN ALPHA-2(VI) CHAIN PRECURSOR.; ISOFORM 2C2 OF COLLAGEN ALPHA-2(VI) CHAIN PRECURSOR.                                        | Q5VVA5; Q00186; Q53FW1; Q5VTL6; Q86YJ3; Q9UPD7; P02675; Q32Q65; Q3KPF2; Q5TCU6; Q89YD0; Q9NZO2; Q9UHH8; Q9UPX3; Q9Y490; Q9H117; Q9NP98; A2RTX1; Q60661; P13533; Q13943; Q14906; Q14907; Q9UQV1                                                         | CO6A2_HUMAN; Q9BUM6_HUMAN                                                                                    |
| 703                        | IPI00305461; IPI00645038                                        | ITI2              | 935                                  | 946  | 941  | 1.1E+05                               | 1.1E+05 | 1.1E+05 | 4.8             | 3                     | 0         | 0         | 0        | 1         | INTER-ALPHA-TRYPsin INHIBITOR HEAVY CHAIN H2 PRECURSOR.; INTER-ALPHA (GLOBULIN) INHIBITOR H2.                                                                                                              | Q5VVA5; Q00186; Q53FW1; Q5VTL6; Q86YJ3; Q9UPD7; P02675; Q32Q65; Q3KPF2; Q5TCU6; Q89YD0; Q9NZO2; Q9UHH8; Q9UPX3; Q9Y490; Q9H117; Q9NP98; A2RTX1; Q60661; P13533; Q13943; Q14906; Q14907; Q9UQV1                                                         | A2RTY6_HUMAN; ITI2_HUMAN; Q5T985_HUMAN; Q5T986_HUMAN                                                         |
| 704                        | IPI00305692; IPI00642032                                        | TXNL1             | 289                                  | 325  | 307  | 3.2E+04                               | 3.7E+04 | 3.4E+04 | 15.9            | 4                     | 0         | 0         | 0        | 1         | THIOREDOXIN-LIKE PROTEIN 1.; 37 KDA PROTEIN.                                                                                                                                                               | Q5VVA5; Q00186; Q53FW1; Q5VTL6; Q86YJ3; Q9UPD7; P02675; Q32Q65; Q3KPF2; Q5TCU6; Q89YD0; Q9NZO2; Q9UHH8; Q9UPX3; Q9Y490; Q9H117; Q9NP98; A2RTX1; Q60661; P13533; Q13943; Q14906; Q14907; Q9UQV1                                                         | ; Q59G46_HUMAN; TXNL1_HUMAN                                                                                  |
| 705                        | IPI00306280                                                     | DENR              | 199                                  | 199  | 199  | 2.2E+04                               | 2.2E+04 | 2.2E+04 | 10.1            | 2                     | 0         | 0         | 0        | 1         | DENSITY-REGULATED PROTEIN.                                                                                                                                                                                 | Q5VVA5; Q00186; Q53FW1; Q5VTL6; Q86YJ3; Q9UPD7; P02675; Q32Q65; Q3KPF2; Q5TCU6; Q89YD0; Q9NZO2; Q9UHH8; Q9UPX3; Q9Y490; Q9H117; Q9NP98; A2RTX1; Q60661; P13533; Q13943; Q14906; Q14907; Q9UQV1                                                         |                                                                                                              |
| 706                        | IPI00328415; IPI00446235                                        | CYB5R3            | 278                                  | 301  | 290  | 3.2E+04                               | 3.4E+04 | 3.3E+04 | 16.3            | 4                     | 1         | 1         | 0        | 1         | ISOFORM 1 OF NADH-CYTOCHROME B5 REDUCTASE.; ISOFORM 2 OF NADH-CYTOCHROME B5 REDUCTASE.                                                                                                                     | Q5VVA5; Q00186; Q53FW1; Q5VTL6; Q86YJ3; Q9UPD7; P02675; Q32Q65; Q3KPF2; Q5TCU6; Q89YD0; Q9NZO2; Q9UHH8; Q9UPX3; Q9Y490; Q9H117; Q9NP98; A2RTX1; Q60661; P13533; Q13943; Q14906; Q14907; Q9UQV1                                                         | NCB5R_HUMAN; Q6TGM4_HUMAN; Q6TGM5_HUMAN; Q6ZV16_HUMAN                                                        |

| Protein Group <sup>a</sup> | IPI ID                                                          | IPI gene name | Amino Acids in Sequence <sup>b</sup> |      |      | Protein Molecular Weight <sup>c</sup> |         |         | Seq. Cov. (max) | Unique Peptides (max) | Detection |           |          |           | Protein name                                                                                                                                                                                       | Uniprot Id                                                                                                                                                                                                                                           | Uniprot Entry Name                                                                                                                                                                                              |
|----------------------------|-----------------------------------------------------------------|---------------|--------------------------------------|------|------|---------------------------------------|---------|---------|-----------------|-----------------------|-----------|-----------|----------|-----------|----------------------------------------------------------------------------------------------------------------------------------------------------------------------------------------------------|------------------------------------------------------------------------------------------------------------------------------------------------------------------------------------------------------------------------------------------------------|-----------------------------------------------------------------------------------------------------------------------------------------------------------------------------------------------------------------|
|                            |                                                                 |               | Min.                                 | Max. | Mean | Min.                                  | Max.    | Mean    |                 |                       | Expt. I-1 | Expt. I-2 | Expt. II | Expt. III |                                                                                                                                                                                                    |                                                                                                                                                                                                                                                      |                                                                                                                                                                                                                 |
| 707                        | IPI00328650; IPI00411520; IPI00784009                           | C14orf159     | 616                                  | 621  | 618  | 6.6E+04                               | 6.7E+04 | 6.7E+04 | 23.9            | 9                     | 1         | 1         | 0        | 1         | ISOFORM 1 OF UPF0317 PROTEIN C14ORF159. MITOCHONDRIAL PRECURSOR.; ISOFORM 2 OF UPF0317 PROTEIN C14ORF159, MITOCHONDRIAL PRECURSOR.; 67 KDA PROTEIN.                                                | Q4LE40; Q53HP9; Q6IA66; Q7Z3D6; Q8SSV3; Q86SX8; Q8SX9; Q86T08; Q86TV5; Q8NB88; Q96GW5; Q9H7G0; Q9H8Y9; Q9HW6 Q02878; Q2M3Q3; Q8N5Z7; Q8TBK5; Q8WW97; Q9HBB3                                                                                          | ; CN159_HUMAN; Q4LE40_HUMAN; Q53HP9_HUMAN; Q6IA66_HUMAN; Q8NB88_HUMAN                                                                                                                                           |
| 708                        | IPI00329389; IPI00741742; IPI00790342                           | RPL6          | 288                                  | 289  | 288  | 3.3E+04                               | 3.3E+04 | 3.3E+04 | 9.3             | 2                     | 0         | 0         | 0        | 1         | 60S RIBOSOMAL PROTEIN L6.; RIBOSOMAL PROTEIN L6.; DNA-BINDING PROTEIN TAXREB107.                                                                                                                   | Q8N5Z7; Q8TBK5; Q8WW97; Q9HBB3                                                                                                                                                                                                                       | Q8N5Z7_HUMAN; Q8TBK5_HUMAN; Q9HBB3_HUMAN; RL6_HUMAN                                                                                                                                                             |
| 709                        | IPI00329646                                                     | PCBD2         | 130                                  | 130  | 130  | 1.4E+04                               | 1.4E+04 | 1.4E+04 | 13.9            | 2                     | 0         | 0         | 0        | 1         | PTERIN-4-ALPHA-CARBINOLAMINE DEHYDRATASE 2.                                                                                                                                                        | A1L4Q3; Q5I022; Q6XP14; Q6PPW4; Q71RH0; Q8IW18; Q9H0M8; Q9H5L8; Q9H9T2                                                                                                                                                                               | A1L4Q3_HUMAN; RN123_HUMAN                                                                                                                                                                                       |
| 710                        | IPI00335085; IPI00783374                                        | RNF123        | 1314                                 | 1316 | 1315 | 1.5E+05                               | 1.5E+05 | 1.5E+05 | 4.3             | 3                     | 1         | 1         | 0        | 1         | ISOFORM 1 OF E3 UBIQUITIN-PROTEIN LIGASE RNF123.; ISOFORM 2 OF E3 UBIQUITIN-PROTEIN LIGASE RNF123.                                                                                                 | P45378; Q12975; Q12976; Q12977; Q12978; Q17RG9; Q6FH29; Q6N056; Q86TH6                                                                                                                                                                               | Q17RG9_HUMAN; Q6FH29_HUMAN; Q6N056_HUMAN; TNNT3_HUMAN                                                                                                                                                           |
| 711                        | IPI00337454; IPI00337455; IPI00477427; IPI00641544; IPI00747742 | TNNT3         | 256                                  | 269  | 261  | 3.0E+04                               | 3.2E+04 | 3.1E+04 | 38.7            | 15                    | 1         | 1         | 0        | 1         | OF TROPONIN T, FAST SKELETAL MUSCLE.; ISOFORM 2 OF TROPONIN T, FAST SKELETAL MUSCLE.; ISOFORM 3 OF TROPONIN T, FAST SKELETAL MUSCLE.; HYPOTHETICAL PROTEIN DKFZ779M2348.                           | Q6B1T7; Q6S4P3; Q86W19; Q8WU07; Q96AU9; Q96CU0; Q3KNU7; Q5H9D1; Q68DW4; Q6UXV4 A0AVL2; O15500; Q05D68; Q5VW13; Q5VW14; Q6M2K3; Q6N026; Q6N059; Q6NSH8; Q6PDB0; Q719H6; Q86T05; Q86T06; Q86T66; Q86VF6; Q86VF7; Q8N3R6; Q8N8F9; Q8TCH0; Q96MG4 Q8NF44 | Q17RG9_HUMAN; Q6FH29_HUMAN; Q6N056_HUMAN; TNNT3_HUMAN; Q6B1T7_HUMAN; Q6S4P3_HUMAN; Q86W19_HUMAN; Q8WU07_HUMAN; Q96AU9_HUMAN; Q96CU0_HUMAN                                                                       |
| 712                        | IPI00376676                                                     | FTL           | 191                                  | 191  | 191  | 2.1E+04                               | 2.1E+04 | 2.1E+04 | 12.0            | 2                     | 0         | 0         | 0        | 1         | FERRITIN LIGHT POLYPEPTIDE VARIANT.                                                                                                                                                                |                                                                                                                                                                                                                                                      |                                                                                                                                                                                                                 |
| 713                        | IPI00394809                                                     | APOOL         | 268                                  | 268  | 268  | 2.9E+04                               | 2.9E+04 | 2.9E+04 | 10.8            | 2                     | 0         | 0         | 0        | 1         | APOLIPOPROTEIN O-LIKE PRECURSOR.                                                                                                                                                                   |                                                                                                                                                                                                                                                      | APOOL_HUMAN; Q68DW4_HUMAN                                                                                                                                                                                       |
| 714                        | IPI00398162; IPI00478974; IPI00745227; IPI00786896              | NRAP          | 1695                                 | 1738 | 1717 | 1.9E+05                               | 2.0E+05 | 2.0E+05 | 5.1             | 6                     | 0         | 0         | 0        | 1         | ISOFORM 2 OF NEBULIN-RELATED-ANCHORING PROTEIN.; ISOFORM 3 OF NEBULIN-RELATED-ANCHORING PROTEIN.; ISOFORM 1 OF NEBULIN-RELATED-ANCHORING PROTEIN.; ISOFORM 4 OF NEBULIN-RELATED-ANCHORING PROTEIN. | Q8N3R6; Q8N8F9; Q8TCH0; Q96MG4 Q8NF44                                                                                                                                                                                                                | A0AVL2_HUMAN; NRAP_HUMAN; Q05D68_HUMAN                                                                                                                                                                          |
| 715                        | IPI00398837                                                     | CCDC8         | 1476                                 | 1476 | 1476 | 1.6E+05                               | 1.6E+05 | 1.6E+05 | 1.6             | 2                     | 0         | 0         | 0        | 1         | COILED-COIL DOMAIN CONTAINING 88.                                                                                                                                                                  |                                                                                                                                                                                                                                                      | Q8NF44_HUMAN                                                                                                                                                                                                    |
| 716                        | IPI00399007; IPI00426051; IPI00829767                           | IGHG2         | 393                                  | 464  | 425  | 4.4E+04                               | 5.1E+04 | 4.7E+04 | 19.2            | 7                     | 1         | 1         | 0        | 1         | HYPOTHETICAL PROTEIN DKFZP686I04196 (FRAGMENT).; HYPOTHETICAL PROTEIN DKFZP686C15213.; PROTEIN.                                                                                                    | A2J1N1; Q0ZC11; Q6MZU6; Q6N093 Q32Q78; Q96FW1; Q86I13; Q9NXQ4; Q9P0B8                                                                                                                                                                                | ; A2J1N1_HUMAN; Q0ZC11_HUMAN; Q6MZU6_HUMAN; Q6N093_HUMAN                                                                                                                                                        |
| 717                        | IPI00409750                                                     | OTUB1         | 315                                  | 315  | 315  | 3.5E+04                               | 3.5E+04 | 3.5E+04 | 6.0             | 2                     | 0         | 0         | 0        | 1         | ISOFORM 2 OF UBIQUITIN THIOESTERASE PROTEIN OTUB1.                                                                                                                                                 | P10768; Q5TBU8; Q5TBV0; Q5TBV2; Q9BVJ2                                                                                                                                                                                                               | OTUB1_HUMAN                                                                                                                                                                                                     |
| 718                        | IPI00411706; IPI00641040                                        | ESD           | 253                                  | 282  | 268  | 2.8E+04                               | 3.1E+04 | 3.0E+04 | 26.5            | 6                     | 0         | 0         | 0        | 1         | S-FORMYLGLUTATHIONE HYDROLASE.; 28 KDA PROTEIN.                                                                                                                                                    | Q6U2E9; Q6U2F8; Q6U2G0; Q6U2G1; Q6U2H4; Q6U2L1; Q6U2L6; Q6U2L7; Q6U2M2; Q6U2M5; Q6VCV8; Q96SA7; Q96SA8; Q9UNU2 P16671; Q13966; Q16093; Q8TCV7; Q9BP28; Q9BQA7; Q9BQC2; Q9BZM7; Q9BZM8; Q9BZM9; Q9BZN0; Q9BZN1; Q9BZN2; Q9BZN3; Q9BZN4; Q9BZN5        | ; ESTD_HUMAN Q6U2E9_HUMAN; Q6U2F8_HUMAN; Q6U2G0_HUMAN; Q6U2G1_HUMAN; Q6U2H4_HUMAN; Q6U2L1_HUMAN; Q6U2L6_HUMAN; Q6U2L7_HUMAN; Q6U2M2_HUMAN; Q6U2M5_HUMAN; Q6VCV8_HUMAN; Q96SA7_HUMAN; Q96SA8_HUMAN; Q9UNU2_HUMAN |
| 719                        | IPI00418163                                                     | C4B           | 1744                                 | 1744 | 1744 | 1.9E+05                               | 1.9E+05 | 1.9E+05 | 13.1            | 15                    | 0         | 1         | 0        | 1         | COMPLEMENT COMPONENT 4B PREPROTEIN.                                                                                                                                                                | Q16671; Q13966; Q16093; Q8TCV7; Q9BP28; Q9BQA7; Q9BQC2; Q9BZM7; Q9BZM8; Q9BZM9; Q9BZN0; Q9BZN1; Q9BZN2; Q9BZN3; Q9BZN4; Q9BZN5                                                                                                                       | CD36_HUMAN; Q9BQA7_HUMAN; Q9BZM7_HUMAN; Q9BZM9_HUMAN; Q9BZN0_HUMAN; Q9BZN1_HUMAN; Q9BZN2_HUMAN                                                                                                                  |
| 720                        | IPI00418495                                                     | CD36          | 472                                  | 472  | 472  | 5.3E+04                               | 5.3E+04 | 5.3E+04 | 8.9             | 3                     | 1         | 1         | 0        | 1         | PLATELET GLYCOPROTEIN 4. NADH DEHYDROGENASE (UBIQUINONE) 1 ALPHA SUBCOMPLEX, 6, 14KDA.                                                                                                             | Q6FGW0; Q6IBT8 Q53GA8; Q53GF2; Q53TC6; Q6NVY1; Q92931                                                                                                                                                                                                | Q6FGW0_HUMAN; Q6IBT8_HUMAN Q53GA8_HUMAN; Q53GF2_HUMAN; Q53TC6_HUMAN; Q6NVY1_HUMAN; Q92931_HUMAN                                                                                                                 |
| 721                        | IPI00419266                                                     | NDUFA6        | 154                                  | 154  | 154  | 1.8E+04                               | 1.8E+04 | 1.8E+04 | 12.3            | 2                     | 1         | 0         | 0        | 1         | 3-HYDROXYISOBUTYRYL-COENZYME A HYDROLASE ISOFORM 1.                                                                                                                                                |                                                                                                                                                                                                                                                      | Q6FGW0_HUMAN; Q6IBT8_HUMAN Q53GA8_HUMAN; Q53GF2_HUMAN; Q53TC6_HUMAN; Q6NVY1_HUMAN; Q92931_HUMAN                                                                                                                 |
| 722                        | IPI00419802                                                     | HIBCH         | 386                                  | 386  | 386  | 4.3E+04                               | 4.3E+04 | 4.3E+04 | 26.4            | 10                    | 1         | 1         | 0        | 1         | HYPOTHETICAL PROTEIN DKFZP686G21220 (FRAGMENT).                                                                                                                                                    | Q6N090                                                                                                                                                                                                                                               | Q6N090_HUMAN                                                                                                                                                                                                    |
| 723                        | IPI00423460                                                     | IGHA1         | 506                                  | 506  | 506  | 5.4E+04                               | 5.4E+04 | 5.4E+04 | 10.1            | 4                     | 1         | 0         | 0        | 1         | NADH DEHYDROGENASE [UBIQUINONE] 1 ALPHA SUBCOMPLEX SUBUNIT 7.                                                                                                                                      | Q95182; Q32Q14; Q6FG42; Q6IB89                                                                                                                                                                                                                       | Q6N090_HUMAN NDUJ7_HUMAN; Q32Q14_HUMAN; Q6FG42_HUMAN; Q6IB89_HUMAN                                                                                                                                              |
| 724                        | IPI00452731                                                     | NDUFA7        | 113                                  | 113  | 113  | 1.3E+04                               | 1.3E+04 | 1.3E+04 | 34.5            | 3                     | 0         | 0         | 0        | 1         |                                                                                                                                                                                                    |                                                                                                                                                                                                                                                      |                                                                                                                                                                                                                 |

| Protein Group | IPI ID                                | IPI gene name                                                                                                                                                                    | Amino Acids in Sequence <sup>1</sup> |      |      | Protein Molecular Weight <sup>1</sup> |         |         | Seq. Cov. (max) | Unique Peptides (max) | Detection |           |          |           | Protein name                                                                                                                                                                                                                                                                                                                  | Uniprot Id                                                                                                                                                                                | Uniprot Entry Name                                                                                                       |
|---------------|---------------------------------------|----------------------------------------------------------------------------------------------------------------------------------------------------------------------------------|--------------------------------------|------|------|---------------------------------------|---------|---------|-----------------|-----------------------|-----------|-----------|----------|-----------|-------------------------------------------------------------------------------------------------------------------------------------------------------------------------------------------------------------------------------------------------------------------------------------------------------------------------------|-------------------------------------------------------------------------------------------------------------------------------------------------------------------------------------------|--------------------------------------------------------------------------------------------------------------------------|
|               |                                       |                                                                                                                                                                                  | Min.                                 | Max. | Mean | Min.                                  | Max.    | Mean    |                 |                       | Expt. I-1 | Expt. I-2 | Expt. II | Expt. III |                                                                                                                                                                                                                                                                                                                               |                                                                                                                                                                                           |                                                                                                                          |
| 725           | IPI00453473                           | HIST1H4A;<br>HIST1H4B;<br>HIST1H4C;<br>HIST1H4D;<br>HIST1H4E;<br>HIST1H4F;<br>HIST1H4H;<br>HIST1H4I;<br>HIST1H4J;<br>HIST1H4K;<br>HIST1H4L;<br>HIST2H4A;<br>HIST2H4B;<br>HIST4H4 | 103                                  | 103  | 103  | 1.1E+04                               | 1.1E+04 | 1.1E+04 | 40.8            | 4                     | 1         | 0         | 0        | 1         | HISTONE H4.                                                                                                                                                                                                                                                                                                                   | A2VCL0; P02304;<br>P02305; P62805;<br>Q0VAS5; Q6B823;<br>Q6DRA9; Q6FG98;<br>Q6NWP7<br>P01023; Q13677;<br>Q59F47; Q5QT50;<br>Q68DN2; Q6PIY3;<br>Q6PN97; Q9BQ22                             | A2VCL0_HUMAN; H4_HUMAN;<br>Q0VAS5_HUMAN; Q6B823_HUMAN;<br>Q6DRA9_HUMAN; Q6FG98_HUMAN;<br>Q6NWP7_HUMAN                    |
| 726           | IPI00478003                           | A2M                                                                                                                                                                              | 1474                                 | 1474 | 1474 | 1.6E+05                               | 1.6E+05 | 1.6E+05 | 22.4            | 26                    | 1         | 1         | 0        | 1         | ALPHA-2-MACROGLOBULIN PRECURSOR.<br>ISOFORM 1 OF SPECTRIN ALPHA CHAIN, BRAIN.;<br>ISOFORM 3 OF SPECTRIN ALPHA CHAIN, BRAIN.;                                                                                                                                                                                                  | Q6IAB6; Q8WZ96;<br>Q9BXX9; Q9NX14<br>Q5VTT5; Q6AWC0;<br>Q6AWC1; Q6NXF9;<br>Q6ZRG7; Q7Z3G9;<br>Q96C54<br>P37802; Q5JRC6;<br>Q5JRC7; Q6FG11;<br>Q9BUH5; Q9H4P0                              | A2MG_HUMAN; Q9BQ22_HUMAN                                                                                                 |
| 727           | IPI00478292; IPI00744706; IPI00745092 | SPTAN1                                                                                                                                                                           | 2460                                 | 2485 | 2475 | 2.8E+05                               | 2.9E+05 | 2.8E+05 | 1.3             | 2                     | 0         | 0         | 0        | 1         | ISOFORM 2 OF SPECTRIN ALPHA CHAIN, BRAIN.<br>ISOFORM 2 OF NADH DEHYDROGENASE [UBIQUINONE] 1<br>BETA SUBCOMPLEX SUBUNIT11, MITOCHONDRIAL<br>PRECURSOR.                                                                                                                                                                         | Q9UG16<br>Q5JRR3; Q5JRR4;<br>Q6IAB6; Q8WZ96;<br>Q9BXX9; Q9NX14<br>Q5VTT5; Q6AWC0;<br>Q6AWC1; Q6NXF9;<br>Q6ZRG7; Q7Z3G9;<br>Q96C54<br>P37802; Q5JRC6;<br>Q5JRC7; Q6FG11;<br>Q9BUH5; Q9H4P0 | : Q9UG16_HUMAN                                                                                                           |
| 728           | IPI00478450                           | NDUFB11                                                                                                                                                                          | 163                                  | 163  | 163  | 1.8E+04                               | 1.8E+04 | 1.8E+04 | 20.9            | 2                     | 0         | 0         | 0        | 1         | ISOFORM 2 OF NADH DEHYDROGENASE [UBIQUINONE] 1 ALPHA<br>SUBCOMPLEX SUBUNIT 5.                                                                                                                                                                                                                                                 | Q16718; Q5H9R2;<br>Q6IRX7<br>Q59FK3; Q6LES2;<br>Q6MZIO; Q6P452<br>P28070; P31148;<br>Q5SZS5; Q6IB4;<br>Q969L6                                                                             | NDUBB_HUMAN<br>Q5VTT5_HUMAN; Q6AWC0_HUMAN;<br>Q6AWC1_HUMAN; Q6NXF9_HUMAN;<br>Q6ZRG7_HUMAN; Q7Z3G9_HUMAN;<br>Q96C54_HUMAN |
| 729           | IPI00478774                           | MYOM3                                                                                                                                                                            | 1441                                 | 1441 | 1441 | 1.6E+05                               | 1.6E+05 | 1.6E+05 | 9.7             | 11                    | 1         | 1         | 0        | 1         | MYOMESIN-3.                                                                                                                                                                                                                                                                                                                   | Q16791; Q53EP3;<br>Q8EY15<br>Q0VAC5; Q6NSB4;<br>Q6PEJ8                                                                                                                                    | PSB4_HUMAN; Q5SZS5_HUMAN;<br>Q6IB4_HUMAN                                                                                 |
| 730           | IPI00550363; IPI00647915              | CCDC19;<br>TAGLN2                                                                                                                                                                | 199                                  | 220  | 210  | 2.2E+04                               | 2.4E+04 | 2.3E+04 | 13.1            | 2                     | 0         | 0         | 0        | 1         | TRANSGELIN-2; 24 KDA PROTEIN.<br>ISOFORM 1 OF ALPHA-1-ANTICHYMOTRYPSIN<br>PRECURSOR.                                                                                                                                                                                                                                          | Q16791; Q53EP3;<br>Q8EY15<br>Q0VAC5; Q6NSB4;<br>Q6PEJ8                                                                                                                                    | : Q6FG11_HUMAN; TAGL2_HUMAN                                                                                              |
| 731           | IPI00550991                           | SERPINA3                                                                                                                                                                         | 448                                  | 448  | 448  | 5.1E+04                               | 5.1E+04 | 5.1E+04 | 13.6            | 4                     | 1         | 1         | 0        | 1         | HYPOTHETICAL PROTEIN DKFZP781K1356.; NADH<br>DEHYDROGENASE [UBIQUINONE] 1 ALPHA<br>SUBCOMPLEX SUBUNIT 5.                                                                                                                                                                                                                      | Q2TU87; Q2TU88                                                                                                                                                                            | Q2TU87_HUMAN; Q2TU88_HUMAN                                                                                               |
| 732           | IPI00412545; IPI00554681              | NDUFA5                                                                                                                                                                           | 116                                  | 116  | 116  | 1.3E+04                               | 1.4E+04 | 1.4E+04 | 31.0            | 3                     | 1         | 0         | 0        | 1         | ISOFORM 2 OF NADH DEHYDROGENASE [UBIQUINONE] 1 ALPHA<br>SUBCOMPLEX SUBUNIT 5.                                                                                                                                                                                                                                                 | Q16718; Q5H9R2;<br>Q6IRX7<br>Q59FK3; Q6LES2;<br>Q6MZIO; Q6P452<br>P28070; P31148;<br>Q5SZS5; Q6IB4;<br>Q969L6                                                                             | NDUA5_HUMAN; Q5H9R2_HUMAN<br>Q59FK3_HUMAN; Q6LES2_HUMAN;<br>Q6MZIO_HUMAN; Q6P452_HUMAN                                   |
| 733           | IPI00555692; IPI00793199              | ANXA4                                                                                                                                                                            | 299                                  | 321  | 310  | 3.4E+04                               | 3.6E+04 | 3.5E+04 | 8.4             | 2                     | 0         | 0         | 0        | 1         | ANXA4 PROTEIN.; ANNEXIN IV.                                                                                                                                                                                                                                                                                                   | Q16791; Q53EP3;<br>Q8EY15<br>Q0VAC5; Q6NSB4;<br>Q6PEJ8                                                                                                                                    | Q6MZIO_HUMAN; Q6P452_HUMAN                                                                                               |
| 734           | IPI00555956                           | PSMB4                                                                                                                                                                            | 264                                  | 264  | 264  | 2.9E+04                               | 2.9E+04 | 2.9E+04 | 9.1             | 2                     | 0         | 0         | 0        | 1         | PROTEASOME SUBUNIT BETA TYPE 4 PRECURSOR.<br>DIHYDROLIPOAMIDE S-ACETYLTRANSFERASE (E2<br>COMPONENT OF PYRUVATEDEHYDROGENASE<br>COMPLEX) VARIANT.<br>HP PROTEIN.; HP PROTEIN.; HAPTOGLOBIN<br>PRECURSOR.<br>20 KDA PROTEIN.                                                                                                    | Q53F31; Q6GTG1;<br>Q6LDC6<br>Q7Z6R3<br>Q8NEJ1                                                                                                                                             | PSB4_HUMAN; Q5SZS5_HUMAN;<br>Q6IB4_HUMAN                                                                                 |
| 735           | IPI00604707                           | DLAT                                                                                                                                                                             | 647                                  | 647  | 647  | 6.9E+04                               | 6.9E+04 | 6.9E+04 | 18.9            | 12                    | 1         | 1         | 0        | 1         | ISOFORM DELTA-1 OF SERINE/THREONINE-PROTEIN<br>PHOSPHATASE 2A 56 KDAREGULATORY SUBUNIT DELTA<br>ISOFORM.; ISOFORM DELTA-2 OF SERINE/THREONINE-<br>PROTEIN PHOSPHATASE 2A 56 KDAREGULATORY<br>SUBUNIT DELTA ISOFORM.; ISOFORM DELTA-3 OF<br>SERINE/THREONINE-PROTEIN PHOSPHATASE 2A 56<br>KDAREGULATORY SUBUNIT DELTA ISOFORM. | Q16791; Q53EP3;<br>Q8EY15<br>Q0VAC5; Q6NSB4;<br>Q6PEJ8                                                                                                                                    | Q16791_HUMAN; Q53EP3_HUMAN;<br>Q8EY15_HUMAN<br>: Q0VAC5_HUMAN; Q6NSB4_HUMAN;<br>Q6PEJ8_HUMAN                             |
| 736           | IPI00431645; IPI00478493; IPI00641737 | HP                                                                                                                                                                               | 281                                  | 420  | 349  | 3.1E+04                               | 4.7E+04 | 3.9E+04 | 17.1            | 5                     | 1         | 1         | 0        | 1         | PRECURSOR.                                                                                                                                                                                                                                                                                                                    | Q53F31; Q6GTG1;<br>Q6LDC6<br>Q7Z6R3<br>Q8NEJ1                                                                                                                                             | Q53F31_HUMAN; Q6GTG1_HUMAN;<br>Q6LDC6_HUMAN<br>Q7Z6R3_HUMAN<br>Q8NEJ1_HUMAN                                              |
| 737           | IPI00645720                           | COQ7                                                                                                                                                                             | 179                                  | 179  | 179  | 2.0E+04                               | 2.0E+04 | 2.0E+04 | 15.1            | 2                     | 0         | 0         | 0        | 1         | 20 KDA PROTEIN.                                                                                                                                                                                                                                                                                                               | Q53F31; Q6GTG1;<br>Q6LDC6<br>Q7Z6R3<br>Q8NEJ1                                                                                                                                             | Q53F31_HUMAN; Q6GTG1_HUMAN;<br>Q6LDC6_HUMAN<br>Q7Z6R3_HUMAN<br>Q8NEJ1_HUMAN                                              |
| 738           | IPI00742696                           | GC                                                                                                                                                                               | 474                                  | 474  | 474  | 5.3E+04                               | 5.3E+04 | 5.3E+04 | 12.0            | 6                     | 1         | 1         | 0        | 1         | VITAMIN D-BINDING PROTEIN PRECURSOR.                                                                                                                                                                                                                                                                                          | Q53F31; Q6GTG1;<br>Q6LDC6<br>Q7Z6R3<br>Q8NEJ1                                                                                                                                             | Q53F31_HUMAN; Q6GTG1_HUMAN;<br>Q6LDC6_HUMAN<br>Q7Z6R3_HUMAN<br>Q8NEJ1_HUMAN                                              |
| 739           | IPI00745471                           | SYNE1                                                                                                                                                                            | 8410                                 | 8410 | 8410 | 9.7E+05                               | 9.7E+05 | 9.7E+05 | 0.2             | 2                     | 0         | 0         | 0        | 1         | OTTHUMP0000017444.                                                                                                                                                                                                                                                                                                            | Q53F31; Q6GTG1;<br>Q6LDC6<br>Q7Z6R3<br>Q8NEJ1                                                                                                                                             | Q53F31_HUMAN; Q6GTG1_HUMAN;<br>Q6LDC6_HUMAN<br>Q7Z6R3_HUMAN<br>Q8NEJ1_HUMAN                                              |
| 740           | IPI00785200                           |                                                                                                                                                                                  | 236                                  | 236  | 236  | 2.5E+04                               | 2.5E+04 | 2.5E+04 | 23.3            | 2                     | 0         | 0         | 0        | 1         | HYPOTHETICAL PROTEIN.                                                                                                                                                                                                                                                                                                         | Q53F31; Q6GTG1;<br>Q6LDC6<br>Q7Z6R3<br>Q8NEJ1                                                                                                                                             | Q53F31_HUMAN; Q6GTG1_HUMAN;<br>Q6LDC6_HUMAN<br>Q7Z6R3_HUMAN<br>Q8NEJ1_HUMAN                                              |
| 741           | IPI00792352                           | RAN                                                                                                                                                                              | 236                                  | 236  | 236  | 2.6E+04                               | 2.6E+04 | 2.6E+04 | 18.6            | 3                     | 0         | 0         | 0        | 1         | 26 KDA PROTEIN.                                                                                                                                                                                                                                                                                                               | Q53F31; Q6GTG1;<br>Q6LDC6<br>Q7Z6R3<br>Q8NEJ1                                                                                                                                             | Q53F31_HUMAN; Q6GTG1_HUMAN;<br>Q6LDC6_HUMAN<br>Q7Z6R3_HUMAN<br>Q8NEJ1_HUMAN                                              |
| 742           | IPI00000030; IPI00219543; IPI00219544 | PPP2R5D                                                                                                                                                                          | 496                                  | 602  | 556  | 5.8E+04                               | 7.0E+04 | 6.5E+04 | 4.5             | 2                     | 0         | 1         | 0        | 0         | ISOFORM DELTA-1 OF SERINE/THREONINE-PROTEIN<br>PHOSPHATASE 2A 56 KDAREGULATORY SUBUNIT DELTA<br>ISOFORM.; ISOFORM DELTA-2 OF SERINE/THREONINE-<br>PROTEIN PHOSPHATASE 2A 56 KDAREGULATORY<br>SUBUNIT DELTA ISOFORM.; ISOFORM DELTA-3 OF<br>SERINE/THREONINE-PROTEIN PHOSPHATASE 2A 56<br>KDAREGULATORY SUBUNIT DELTA ISOFORM. | Q00494; Q00696;<br>Q14738; Q15171;<br>Q59EF0; Q5TC39<br>Q35YB9; Q5TG98;<br>Q9BWT8; Q9BXI3                                                                                                 | 2A5D_HUMAN; Q59EF0_HUMAN;<br>Q5TC39_HUMAN                                                                                |
| 743           | IPI00000146                           | NT5C1A                                                                                                                                                                           | 368                                  | 368  | 368  | 4.1E+04                               | 4.1E+04 | 4.1E+04 | 28.3            | 7                     | 1         | 1         | 0        | 0         | CYTOSOLIC 5'-NUCLEOTIDASE 1A.<br>ISOFORM MITOCHONDRIAL OF MALONYL-COA<br>DECARBOXYLASE, MITOCHONDRIAL PRECURSOR.;<br>ISOFORM CYTOPLASMIC+PEROXISOMAL OF MALONYL-<br>COA DECARBOXYLASE, MITOCHONDRIAL PRECURSOR.                                                                                                               | Q95822; Q9UNU5;<br>Q9Y3F2<br>A2BEY0; P26640;<br>Q5JQ90; Q9E677;<br>Q9UQM2<br>Q96FC6; Q9H993;<br>Q9UFY5<br>Q0VDG5<br>P28289; Q9BUF1                                                        | 5NT1A_HUMAN                                                                                                              |
| 744           | IPI00000663; IPI00759655              | MLYCD                                                                                                                                                                            | 454                                  | 493  | 474  | 5.1E+04                               | 5.5E+04 | 5.3E+04 | 7.5             | 2                     | 1         | 1         | 0        | 0         | ISOFORM 1 OF SERINE<br>HYDROXYMETHYLTRANSFERASE, CYTOSOLIC.;<br>ISOFORM 2 OF SERINE<br>HYDROXYMETHYLTRANSFERASE, CYTOSOLIC.                                                                                                                                                                                                   | Q95822; Q9UNU5;<br>Q9Y3F2<br>A2BEY0; P26640;<br>Q5JQ90; Q9E677;<br>Q9UQM2<br>Q96FC6; Q9H993;<br>Q9UFY5<br>Q0VDG5<br>P28289; Q9BUF1                                                        | DCMC_HUMAN                                                                                                               |
| 745           | IPI00000873; IPI00829641              | VARS                                                                                                                                                                             | 1264                                 | 1264 | 1264 | 1.4E+05                               | 1.4E+05 | 1.4E+05 | 2.1             | 2                     | 0         | 1         | 0        | 0         | VALYL-TRNA SYNTHETASE.; 140 KDA PROTEIN.                                                                                                                                                                                                                                                                                      | Q95822; Q9UNU5;<br>Q9Y3F2<br>A2BEY0; P26640;<br>Q5JQ90; Q9E677;<br>Q9UQM2<br>Q96FC6; Q9H993;<br>Q9UFY5<br>Q0VDG5<br>P28289; Q9BUF1                                                        | : A2BEY0_HUMAN; SYV_HUMAN                                                                                                |
| 746           | IPI00002270                           | C6orf211                                                                                                                                                                         | 441                                  | 441  | 441  | 5.1E+04                               | 5.1E+04 | 5.1E+04 | 11.6            | 4                     | 1         | 1         | 0        | 0         | UPF0364 PROTEIN C6ORF211.                                                                                                                                                                                                                                                                                                     | Q95822; Q9UNU5;<br>Q9Y3F2<br>A2BEY0; P26640;<br>Q5JQ90; Q9E677;<br>Q9UQM2<br>Q96FC6; Q9H993;<br>Q9UFY5<br>Q0VDG5<br>P28289; Q9BUF1                                                        | CF211_HUMAN                                                                                                              |
| 747           | IPI00002311                           | SCRN3                                                                                                                                                                            | 426                                  | 426  | 426  | 4.9E+04                               | 4.9E+04 | 4.9E+04 | 6.1             | 2                     | 1         | 1         | 0        | 0         | SECERNIN-3.                                                                                                                                                                                                                                                                                                                   | Q95822; Q9UNU5;<br>Q9Y3F2<br>A2BEY0; P26640;<br>Q5JQ90; Q9E677;<br>Q9UQM2<br>Q96FC6; Q9H993;<br>Q9UFY5<br>Q0VDG5<br>P28289; Q9BUF1                                                        | Q0VDG5_HUMAN<br>TMOD1_HUMAN                                                                                              |
| 748           | IPI00002375                           | TMOD1                                                                                                                                                                            | 359                                  | 359  | 359  | 4.1E+04                               | 4.1E+04 | 4.1E+04 | 11.1            | 3                     | 0         | 1         | 0        | 0         | TROPOMODULIN-1.<br>ISOFORM 1 OF SERINE<br>HYDROXYMETHYLTRANSFERASE, CYTOSOLIC.;<br>ISOFORM 2 OF SERINE<br>HYDROXYMETHYLTRANSFERASE, CYTOSOLIC.                                                                                                                                                                                | Q95822; Q9UNU5;<br>Q9Y3F2<br>A2BEY0; P26640;<br>Q5JQ90; Q9E677;<br>Q9UQM2<br>Q96FC6; Q9H993;<br>Q9UFY5<br>Q0VDG5<br>P28289; Q9BUF1                                                        | TMOD1_HUMAN                                                                                                              |
| 749           | IPI00002519; IPI00220668              | SHMT1                                                                                                                                                                            | 444                                  | 483  | 464  | 4.9E+04                               | 5.3E+04 | 5.1E+04 | 6.2             | 2                     | 0         | 1         | 0        | 0         | ISOFORM 1 OF SERINE<br>HYDROXYMETHYLTRANSFERASE, CYTOSOLIC.;<br>ISOFORM 2 OF SERINE<br>HYDROXYMETHYLTRANSFERASE, CYTOSOLIC.                                                                                                                                                                                                   | P34896; Q53E77;<br>Q96HY0; Q9UMD1;<br>Q9UMD2<br>P36578; P39029;<br>Q4VBR0; Q53G74;<br>Q59GY2; Q969Z9                                                                                      | GLYC_HUMAN; Q53E77_HUMAN;<br>Q96HY0_HUMAN                                                                                |
| 750           | IPI00003918                           | RPL4                                                                                                                                                                             | 427                                  | 427  | 427  | 4.8E+04                               | 4.8E+04 | 4.8E+04 | 8.2             | 3                     | 1         | 1         | 0        | 0         | 60S RIBOSOMAL PROTEIN L4.                                                                                                                                                                                                                                                                                                     | P34896; Q53E77;<br>Q96HY0; Q9UMD1;<br>Q9UMD2<br>P36578; P39029;<br>Q4VBR0; Q53G74;<br>Q59GY2; Q969Z9                                                                                      | Q53G74_HUMAN; Q59GY2_HUMAN;<br>RL4_HUMAN                                                                                 |

| Protein Group* | IPI ID                                             | IPI gene name | Amino Acids in Sequence <sup>1</sup> |      |      | Protein Molecular Weight <sup>1</sup> |         |         | Seq. Cov. (max) | Unique Peptides (max) | Detection |           |          |           | Protein name                                                                                                                                                                                                                          | Uniprot Id                                                                     | Uniprot Entry Name                                                                                          |
|----------------|----------------------------------------------------|---------------|--------------------------------------|------|------|---------------------------------------|---------|---------|-----------------|-----------------------|-----------|-----------|----------|-----------|---------------------------------------------------------------------------------------------------------------------------------------------------------------------------------------------------------------------------------------|--------------------------------------------------------------------------------|-------------------------------------------------------------------------------------------------------------|
|                |                                                    |               | Min.                                 | Max. | Mean | Min.                                  | Max.    | Mean    |                 |                       | Expt. I-1 | Expt. I-2 | Expt. II | Expt. III |                                                                                                                                                                                                                                       |                                                                                |                                                                                                             |
| 751            | IPI00003944                                        | DBT           | 482                                  | 482  | 482  | 5.3E+04                               | 5.3E+04 | 5.3E+04 | 6.9             | 2                     | 1         | 1         | 0        | 0         | LIPONAMIDE ACYLTRANSFERASE COMPONENT OF BRANCHED-CHAIN ALPHA-KETO ACID DEHYDROGENASE COMPLEX, MITOCHONDRIAL PRECURSOR.                                                                                                                | P11182; Q5VVL8                                                                 | ODB2_HUMAN; Q5VVL8_HUMAN                                                                                    |
| 752            | IPI00004839                                        | CRKL          | 303                                  | 303  | 303  | 3.4E+04                               | 3.4E+04 | 3.4E+04 | 19.8            | 4                     | 1         | 1         | 0        | 0         | CRK-LIKE PROTEIN.                                                                                                                                                                                                                     | P46109                                                                         | CRKL_HUMAN                                                                                                  |
| 753            | IPI00005198; IPI00641665                           | ILF2          | 115                                  | 390  | 253  | 1.2E+04                               | 4.3E+04 | 2.8E+04 | 8.0             | 2                     | 1         | 1         | 0        | 0         | INTERLEUKIN ENHANCER-BINDING FACTOR 2; 12 KDA                                                                                                                                                                                         | Q9P1N0                                                                         | : ILF2_HUMAN; Q53FG3_HUMAN                                                                                  |
| 754            | IPI00005809                                        | SDPR          | 425                                  | 425  | 425  | 4.7E+04                               | 4.7E+04 | 4.7E+04 | 11.8            | 3                     | 1         | 1         | 0        | 0         | SERUM DEPRIVATION-RESPONSE PROTEIN.                                                                                                                                                                                                   | Q95810                                                                         | SDPR_HUMAN                                                                                                  |
| 755            | IPI00006114                                        | SERPINF1      | 418                                  | 418  | 418  | 4.6E+04                               | 4.6E+04 | 4.6E+04 | 12.9            | 4                     | 1         | 1         | 0        | 0         | PIGMENT EPITHELIUM-DERIVED FACTOR PRECURSOR.                                                                                                                                                                                          | P36955; Q13236; Q2TU83; Q96CT1; Q96R01; Q9W1A4                                 | PEDF_HUMAN; Q2TU83_HUMAN                                                                                    |
| 756            | IPI00006451                                        | NSF           | 744                                  | 744  | 744  | 8.3E+04                               | 8.3E+04 | 8.3E+04 | 5.8             | 3                     | 1         | 1         | 0        | 0         | VESICLE-FUSING ATPASE.                                                                                                                                                                                                                | P46459; Q8N6D7; Q96D47; Q9H3V6; Q9UKZ2                                         | NSF_HUMAN; Q96D47_HUMAN; Q9H3V6_HUMAN                                                                       |
| 757            | IPI00006558; IPI00022824                           | SH3GLB1       | 365                                  | 386  | 376  | 4.1E+04                               | 4.3E+04 | 4.2E+04 | 7.4             | 2                     | 1         | 1         | 0        | 0         | ISOFORM 1 OF SH3 DOMAIN GRB2-LIKE PROTEIN B1.; ISOFORM 2 OF SH3 DOMAIN GRB2-LIKE PROTEIN B1. ISOFORM 1 OF DEHYDROGENASE/REDUCTASE SDR FAMILY MEMBER 7 PRECURSOR.; ISOFORM 2 OF DEHYDROGENASE/REDUCTASE SDR FAMILY MEMBER 7 PRECURSOR. | Q5H8U5; Q9H3Z0; Q9NR47; Q9NYA9; Q9Y371                                         | Q5H8U5_HUMAN; SHLB1_HUMAN                                                                                   |
| 758            | IPI00006957; IPI00339238                           | DHRS7         | 289                                  | 339  | 314  | 3.2E+04                               | 3.8E+04 | 3.5E+04 | 13.6            | 3                     | 1         | 1         | 0        | 0         | HYPOTHETICAL PROTEIN ARL6IP2.; ADP-RIBOSYLATION FACTOR-LIKE PROTEIN 6-INTERACTING PROTEIN 2.                                                                                                                                          | Q9UKU2; Q9Y394                                                                 | DHRS7_HUMAN                                                                                                 |
| 759            | IPI00007183; IPI00169267                           | ARL6IP2       | 579                                  | 583  | 581  | 6.6E+04                               | 6.6E+04 | 6.6E+04 | 5.9             | 2                     | 1         | 1         | 0        | 0         | CYTOPLASMIC DYNEIN 1 LIGHT INTERMEDIATE CHAIN 1. VACUOLAR ATP SYNTHASE CATALYTIC SUBUNIT A, UBIQUITOUS ISOFORM.                                                                                                                       | Q4ZG30; Q7Z630; Q8NH8; Q8NH89; Q9H5M7                                          | Q4ZG30_HUMAN; Q7Z630_HUMAN; Q8NH8_HUMAN; Q8NH89_HUMAN; Q9H5M7_HUMAN                                         |
| 760            | IPI00007675                                        | DYNC1L1       | 523                                  | 523  | 523  | 5.7E+04                               | 5.7E+04 | 5.7E+04 | 9.2             | 3                     | 1         | 1         | 0        | 0         | UV EXCISION REPAIR PROTEIN RAD23 HOMOLOG A.                                                                                                                                                                                           | A2RRG7; Q53HC8; Q53HK7; Q6MZE7; Q9Y6G9                                         | A2RRG7_HUMAN; DC1L1_HUMAN; Q6MZE7_HUMAN                                                                     |
| 761            | IPI00007682                                        | ATP6V1A       | 617                                  | 617  | 617  | 6.8E+04                               | 6.8E+04 | 6.8E+04 | 6.2             | 2                     | 1         | 1         | 0        | 0         | UV EXCISION REPAIR PROTEIN RAD23 HOMOLOG B.                                                                                                                                                                                           | P54725; Q99E08; Q5M721                                                         | Q59E08_HUMAN; Q5M721_HUMAN; RD23A_HUMAN                                                                     |
| 762            | IPI00008219                                        | RAD23A        | 363                                  | 363  | 363  | 4.0E+04                               | 4.0E+04 | 4.0E+04 | 14.1            | 3                     | 0         | 1         | 0        | 0         | UV EXCISION REPAIR PROTEIN RAD23 HOMOLOG B.                                                                                                                                                                                           | P54727; Q53F10; Q7Z5K8; Q8WUB0                                                 | Q53F10_HUMAN; Q7Z5K8_HUMAN; RD23B_HUMAN                                                                     |
| 763            | IPI00008223                                        | RAD23B        | 409                                  | 409  | 409  | 4.3E+04                               | 4.3E+04 | 4.3E+04 | 17.4            | 5                     | 1         | 1         | 0        | 0         | RUVB-LIKE 2.                                                                                                                                                                                                                          | Q6FIB9; Q6PKZ7; Q9Y230; Q9Y361                                                 | Q6FIB9_HUMAN; RUVB2_HUMAN                                                                                   |
| 764            | IPI00009104                                        | RUVBL2        | 463                                  | 463  | 463  | 5.1E+04                               | 5.1E+04 | 5.1E+04 | 9.5             | 3                     | 1         | 1         | 0        | 0         | SULFIDE:QUINONE OXIDOREDUCTASE, MITOCHONDRIAL PRECURSOR.                                                                                                                                                                              | Q53HW7; Q9UHS8; Q9UQM8; Q9Y6N5                                                 | Q53HW7_HUMAN; Q9UHS8_HUMAN; SQRD_HUMAN                                                                      |
| 765            | IPI00009634                                        | SQRDL         | 450                                  | 450  | 450  | 5.0E+04                               | 5.0E+04 | 5.0E+04 | 10.9            | 4                     | 1         | 1         | 0        | 0         | DELTA-AMINOLEVULINIC ACID DEHYDRATASE.; DELTA-AMINOLEVULINIC ACID DEHYDRATASE ISOFORM A.; DELTA-AMINOLEVULINIC ACID DEHYDRATASE ISOFORM B.                                                                                            | P13716; Q16870; Q16871; Q6ZMU0; Q9BVO9                                         | : HEM2_HUMAN; Q6ZMU0_HUMAN                                                                                  |
| 766            | IPI00010314; IPI00442121; IPI00790373              | ALAD          | 330                                  | 359  | 343  | 3.6E+04                               | 3.9E+04 | 3.8E+04 | 8.6             | 2                     | 1         | 1         | 0        | 0         | T-COMPLEX PROTEIN 1 SUBUNIT EPSILON.                                                                                                                                                                                                  | P48643; Q96G11; Q9BU08; Q9HB74                                                 | Q96G11_HUMAN; Q9BU08_HUMAN; Q9HB74_HUMAN                                                                    |
| 767            | IPI00010720                                        | CCT5          | 541                                  | 541  | 541  | 6.0E+04                               | 6.0E+04 | 6.0E+04 | 14.2            | 6                     | 1         | 1         | 0        | 0         | RAS GTPASE-ACTIVATING PROTEIN-BINDING PROTEIN 1. IMPORTIN ALPHA-4 SUBUNIT.                                                                                                                                                            | Q13283; Q32P45; Q53HH4; Q5HYE9; Q5U0Q1; Q6FI03                                 | Q32P45_HUMAN; Q53HH4_HUMAN; Q5HYE9_HUMAN; Q5U0Q1_HUMAN; Q6FI03_HUMAN                                        |
| 768            | IPI00012442                                        | G3BP1         | 466                                  | 466  | 466  | 5.2E+04                               | 5.2E+04 | 5.2E+04 | 7.5             | 2                     | 1         | 1         | 0        | 0         | IMPORTIN ALPHA-4 SUBUNIT.                                                                                                                                                                                                             | Q00190; Q00629; Q43902; P60228; Q64058; Q64059; Q64252; Q6FG33; Q6IAX5; Q8WVK4 | Q64058_HUMAN; Q64059_HUMAN; Q64252_HUMAN; Q6FG33_HUMAN; Q6IAX5_HUMAN; Q8WVK4_HUMAN                          |
| 769            | IPI00012578                                        | KPNA4         | 521                                  | 521  | 521  | 5.8E+04                               | 5.8E+04 | 5.8E+04 | 11.7            | 5                     | 1         | 1         | 0        | 0         | EUKARYOTIC TRANSLATION INITIATION FACTOR 3 SUBUNIT 6.                                                                                                                                                                                 | A1L0W4; Q16543; Q53YA2; Q6FG59                                                 | IF36_HUMAN; Q6FG33_HUMAN; Q6IAX5_HUMAN; Q8WVK4_HUMAN; A1L0W4_HUMAN; CDC37_HUMAN; Q53YA2_HUMAN; Q6FG59_HUMAN |
| 770            | IPI00013068                                        | EIF3S6        | 445                                  | 445  | 445  | 5.2E+04                               | 5.2E+04 | 5.2E+04 | 18.9            | 6                     | 1         | 1         | 0        | 0         | HSP90 CO-CHAPERONE CDC37.                                                                                                                                                                                                             | P57043; Q13418; Q68D23                                                         | ILK_HUMAN                                                                                                   |
| 771            | IPI00013122                                        | CDC37         | 378                                  | 378  | 378  | 4.4E+04                               | 4.4E+04 | 4.4E+04 | 18.8            | 5                     | 1         | 1         | 0        | 0         | INTEGRIN-LINKED PROTEIN KINASE. ARSA ARSENITE TRANSPORTER, ATP-BINDING, HOMOLOG 1 VARIANT.; ARSENICAL PUMP-DRIVING ATPASE.                                                                                                            | Q43681; Q53FC6; Q92849                                                         | ARSA1_HUMAN; Q53FC6_HUMAN                                                                                   |
| 772            | IPI00013219                                        | ILK           | 452                                  | 452  | 452  | 5.1E+04                               | 5.1E+04 | 5.1E+04 | 5.5             | 2                     | 1         | 1         | 0        | 0         | HYPOTHETICAL PROTEIN DNPEP.; DNPEP PROTEIN (FRAGMENT); 48 KDA PROTEIN.; 52 KDA PROTEIN. ISOFORM 1 OF FRAGILE X MENTAL RETARDATION SYNDROME-RELATED PROTEIN 1.; ISOFORM 2 OF FRAGILE X MENTAL RETARDATION SYNDROME-RELATED PROTEIN 1.  | Q53SB6; Q9BSS9                                                                 | : Q53SB6_HUMAN; Q9BSS9_HUMAN                                                                                |
| 773            | IPI00013466; IPI00783136                           | ASNA1         | 348                                  | 363  | 356  | 3.9E+04                               | 4.0E+04 | 4.0E+04 | 5.5             | 2                     | 1         | 1         | 0        | 0         | OCIA DOMAIN CONTAINING 1 ISOFORM 1. ISOFORM 1 OF L-2-HYDROXYGLUTARATE DEHYDROGENASE, MITOCHONDRIAL PRECURSOR.; ISOFORM 2 OF L-2-HYDROXYGLUTARATE DEHYDROGENASE, MITOCHONDRIAL PRECURSOR.                                              | P51114; Q7Z450; Q8N6R8                                                         | FXR1_HUMAN                                                                                                  |
| 774            | IPI00015856; IPI00029820; IPI00658188; IPI00658215 | DNPEP         | 378                                  | 485  | 442  | 4.1E+04                               | 5.3E+04 | 4.9E+04 | 11.1            | 3                     | 1         | 1         | 0        | 0         | OCIA DOMAIN CONTAINING 1 ISOFORM 1. ISOFORM 1 OF L-2-HYDROXYGLUTARATE DEHYDROGENASE, MITOCHONDRIAL PRECURSOR.; ISOFORM 2 OF L-2-HYDROXYGLUTARATE DEHYDROGENASE, MITOCHONDRIAL PRECURSOR.                                              | Q9NX40                                                                         | Q9NX40_HUMAN                                                                                                |
| 775            | IPI00016249; IPI00554715                           | FXR1          | 539                                  | 621  | 580  | 6.1E+04                               | 7.0E+04 | 6.5E+04 | 7.3             | 3                     | 1         | 1         | 0        | 0         | POLY(RC)-BINDING PROTEIN 1.                                                                                                                                                                                                           | Q9BRR1; Q9H9P8                                                                 | L2HDH_HUMAN                                                                                                 |
| 776            | IPI00016405                                        | OCIAD1        | 245                                  | 245  | 245  | 2.8E+04                               | 2.8E+04 | 2.8E+04 | 11.8            | 2                     | 1         | 1         | 0        | 0         | GLUTAMATE DEHYDROGENASE 1, MITOCHONDRIAL PRECURSOR.                                                                                                                                                                                   | Q13157; Q14975; Q15365; Q53SS8                                                 | PCBP1_HUMAN; Q53SS8_HUMAN                                                                                   |
| 777            | IPI00016458; IPI00029239                           | L2HDH         | 441                                  | 463  | 452  | 4.9E+04                               | 5.0E+04 | 4.9E+04 | 8.2             | 3                     | 1         | 1         | 0        | 0         | GLUTAMATE DEHYDROGENASE 1, MITOCHONDRIAL PRECURSOR.                                                                                                                                                                                   | P00367; Q14400; Q53GW3; Q5TBU3; Q9UOV0                                         | DHE3_HUMAN; Q14400_HUMAN; Q53GW3_HUMAN; Q9UOV0_HUMAN                                                        |
| 778            | IPI00016610                                        | PCBP1         | 356                                  | 356  | 356  | 3.7E+04                               | 3.7E+04 | 3.7E+04 | 21.1            | 4                     | 1         | 1         | 0        | 0         | EH DOMAIN-CONTAINING PROTEIN 1.                                                                                                                                                                                                       | Q14611; Q2M3Q4; Q9H4M9; Q9UNR3                                                 | EHD1_HUMAN                                                                                                  |
| 779            | IPI00016801                                        | GLUD1         | 558                                  | 558  | 558  | 6.1E+04                               | 6.1E+04 | 6.1E+04 | 21.3            | 9                     | 1         | 1         | 0        | 0         | NUCLEOSOME ASSEMBLY PROTEIN 1-LIKE 4.                                                                                                                                                                                                 |                                                                                |                                                                                                             |
| 780            | IPI00017184                                        | EHD1          | 534                                  | 534  | 534  | 6.1E+04                               | 6.1E+04 | 6.1E+04 | 9.9             | 4                     | 1         | 1         | 0        | 0         |                                                                                                                                                                                                                                       |                                                                                |                                                                                                             |
| 781            | IPI00017763                                        | NAP1L4        | 377                                  | 377  | 377  | 4.3E+04                               | 4.3E+04 | 4.3E+04 | 18.8            | 5                     | 1         | 1         | 0        | 0         |                                                                                                                                                                                                                                       |                                                                                |                                                                                                             |

| Protein Group <sup>a</sup> | IPI ID                                                          | IPI gene name     | Amino Acids in Sequence <sup>b</sup> |      |      | Protein Molecular Weight <sup>c</sup> |         |         | Seq. Cov. (max) | Unique Peptides (max) | Detection |           |          |           | Protein name                                                                                                                                                                                                                                                                                                                   | Uniprot Id                                                                                                                                                                                                                                                | Uniprot Entry Name                                                                                                         |
|----------------------------|-----------------------------------------------------------------|-------------------|--------------------------------------|------|------|---------------------------------------|---------|---------|-----------------|-----------------------|-----------|-----------|----------|-----------|--------------------------------------------------------------------------------------------------------------------------------------------------------------------------------------------------------------------------------------------------------------------------------------------------------------------------------|-----------------------------------------------------------------------------------------------------------------------------------------------------------------------------------------------------------------------------------------------------------|----------------------------------------------------------------------------------------------------------------------------|
|                            |                                                                 |                   | Min.                                 | Max. | Mean | Min.                                  | Max.    | Mean    |                 |                       | Expt. I-1 | Expt. I-2 | Expt. II | Expt. III |                                                                                                                                                                                                                                                                                                                                |                                                                                                                                                                                                                                                           |                                                                                                                            |
| 782                        | IPI00017895; IPI00719611                                        | GPD2              | 601                                  | 727  | 664  | 6.8E+04                               | 8.1E+04 | 7.4E+04 | 21.6            | 9                     | 1         | 1         | 0        | 0         | ISOFORM 1 OF GLYCEROL-3-PHOSPHATE DEHYDROGENASE, MITOCHONDRIAL PRECURSOR.; ISOFORM 2 OF GLYCEROL-3-PHOSPHATE DEHYDROGENASE, MITOCHONDRIAL PRECURSOR. ISOFORM 1 OF HETEROGENEOUS NUCLEAR RIBONUCLEOPROTEIN Q.; ISOFORM 3 OF HETEROGENEOUS NUCLEAR RIBONUCLEOPROTEIN Q.; ISOFORM 5 OF HETEROGENEOUS NUCLEAR RIBONUCLEOPROTEIN Q. | P43304; Q53RD0; Q53776; Q59FR1; Q8WUQ0; Q9HAP9 Q60506; Q53H05; Q59GL1; Q5TCG2; Q5TCG3; Q8IW78; Q8N599; Q96LC1; Q96LC2; Q9Y583 Q88950; P61201; Q15647; Q53HJ0; Q59EL2; Q6FGP4; Q8BY54; Q9R249; Q9UNJ2; Q9UNQ5                                              | GPDM_HUMAN; Q53RD0_HUMAN; Q53776_HUMAN; Q8WUQ0_HUMAN                                                                       |
| 783                        | IPI00018140; IPI00402183; IPI00402185                           | SYNCRIP           | 410                                  | 623  | 532  | 4.6E+04                               | 7.0E+04 | 6.0E+04 | 4.2             | 2                     | 1         | 1         | 0        | 0         | ISOFORM 2 OF COP9 SIGNALOSOME COMPLEX SUBUNIT 2.; ISOFORM 1 OF COP9 SIGNALOSOME COMPLEX SUBUNIT 2. ISOFORM 1 OF NICOTINAMIDE PHOSPHORIBOSYLTRANSFERASE.; ISOFORM 2 OF NICOTINAMIDE PHOSPHORIBOSYLTRANSFERASE.                                                                                                                  | P43490; Q3KQV0; Q65821; Q8WWW95 Q53EU3; Q5TA84; Q7RTX2; Q7RTX3; Q9H3X5; Q9NVE7                                                                                                                                                                            | HNRPQ_HUMAN; Q59GL1_HUMAN; Q5TCG3_HUMAN                                                                                    |
| 784                        | IPI00018813; IPI00743825                                        | COPS2             | 443                                  | 453  | 448  | 5.2E+04                               | 5.3E+04 | 5.2E+04 | 17.9            | 7                     | 1         | 1         | 0        | 0         | ISOFORM 1 OF NICOTINAMIDE PHOSPHORIBOSYLTRANSFERASE.; ISOFORM 2 OF NICOTINAMIDE PHOSPHORIBOSYLTRANSFERASE.                                                                                                                                                                                                                     | P43490; Q3KQV0; Q65821; Q8WWW95 Q53EU3; Q5TA84; Q7RTX2; Q7RTX3; Q9H3X5; Q9NVE7                                                                                                                                                                            | CSN2_HUMAN; Q53HJ0_HUMAN; Q59EL2_HUMAN                                                                                     |
| 785                        | IPI00018873; IPI00337370                                        | PBEF1             | 368                                  | 491  | 430  | 4.2E+04                               | 5.6E+04 | 4.9E+04 | 19.8            | 5                     | 1         | 1         | 0        | 0         | PANTOTHENATE KINASE 4.                                                                                                                                                                                                                                                                                                         | P43490; Q3KQV0; Q65821; Q8WWW95 Q53EU3; Q5TA84; Q7RTX2; Q7RTX3; Q9H3X5; Q9NVE7                                                                                                                                                                            | NAMPT_HUMAN; Q65821_HUMAN                                                                                                  |
| 786                        | IPI00018946                                                     | PANK4             | 773                                  | 773  | 773  | 8.6E+04                               | 8.6E+04 | 8.6E+04 | 8.4             | 5                     | 1         | 1         | 0        | 0         | NEDD8-ACTIVATING ENZYME E1 REGULATORY SUBUNIT.; 60 KDA PROTEIN.; AMYLOID BETA PRECURSOR PROTEIN-BINDING PROTEIN 1 ISOFORM C.; AMYLOID BETA PRECURSOR PROTEIN-BINDING PROTEIN 1 ISOFORM B.; 61 KDA PROTEIN.                                                                                                                     | Q13564                                                                                                                                                                                                                                                    | ; ULA1_HUMAN                                                                                                               |
| 787                        | IPI00018968; IPI00479845; IPI00604652; IPI00604676; IPI00646350 | APPBP1            | 445                                  | 537  | 516  | 5.1E+04                               | 6.1E+04 | 5.8E+04 | 7.1             | 2                     | 0         | 1         | 0        | 0         | ISOFORM LONG OF 60 KDA SS-A/RO RIBONUCLEOPROTEIN.; TROVE DOMAIN FAMILY, MEMBER 2.; TROVE DOMAIN FAMILY, MEMBER 2.; 60KD RO/SSA AUTOANTIGEN ISOFORM 1.                                                                                                                                                                          | P10155; Q5LJ98; Q5LJ99; Q5LJA0; Q86WL3; Q86WL4; Q92787; Q9H1W6 P51659; Q59H27; Q9UBA4 Q2NL95; Q53FM0; Q53G16; Q68D77; Q69YM2; Q6FIB7; Q6IAE0; Q7Z4W5; Q9H0U0; Q9HBZ9; Q9NUU7; Q9UMR2 P51665; Q6PK12; Q96E97                                               | ; ULA1_HUMAN                                                                                                               |
| 788                        | IPI00019450; IPI00642416; IPI00646322; IPI00646813              | TROVE2            | 518                                  | 538  | 529  | 5.8E+04                               | 6.1E+04 | 6.0E+04 | 4.8             | 2                     | 0         | 1         | 0        | 0         | PEROXISOMAL MULTIFUNCTIONAL ENZYME TYPE 2.                                                                                                                                                                                                                                                                                     | Q9UBA4 Q2NL95; Q53FM0; Q53G16; Q68D77; Q69YM2; Q6FIB7; Q6IAE0; Q7Z4W5; Q9H0U0; Q9HBZ9; Q9NUU7; Q9UMR2 P51665; Q6PK12; Q96E97                                                                                                                              | Q5LJ98_HUMAN; Q5LJ99_HUMAN; Q5LJA0_HUMAN; Q86WL3_HUMAN; Q86WL4_HUMAN; R060_HUMAN; DHB4_HUMAN; Q59H27_HUMAN; Q9UBA4_HUMAN   |
| 789                        | IPI00019912                                                     | HSD17B4           | 736                                  | 736  | 736  | 8.0E+04                               | 8.0E+04 | 8.0E+04 | 3.9             | 2                     | 1         | 1         | 0        | 0         | ISOFORM 1 OF ATP-DEPENDENT RNA HELICASE DDX19B.; ATP-DEPENDENT RNA HELICASE DDX19A.; ISOFORM 2 OF ATP-DEPENDENT RNA HELICASE DDX19B.; HYPOTHETICAL PROTEIN DKFZP686C21137. 26S PROTEASOME NON-ATPASE REGULATORY SUBUNIT 7.                                                                                                     | Q9UBA4 Q2NL95; Q53FM0; Q53G16; Q68D77; Q69YM2; Q6FIB7; Q6IAE0; Q7Z4W5; Q9H0U0; Q9HBZ9; Q9NUU7; Q9UMR2 P51665; Q6PK12; Q96E97                                                                                                                              | DD19A_HUMAN; DD19B_HUMAN; Q2NL95_HUMAN; Q53G16_HUMAN; Q68D77_HUMAN; Q69YM2_HUMAN; Q7Z4W5_HUMAN; Q9H0U0_HUMAN; Q9HBZ9_HUMAN |
| 790                        | IPI00008943; IPI00019918; IPI00027599; IPI00155054              | DDX19A; DDX19B    | 447                                  | 479  | 463  | 5.0E+04                               | 5.4E+04 | 5.2E+04 | 9.0             | 3                     | 1         | 1         | 0        | 0         | ISOFORM 1 OF 26S PROTEASE REGULATORY SUBUNIT 6B.; SIMILAR TO 26S PROTEASE REGULATORY SUBUNIT 6B.                                                                                                                                                                                                                               | P43686; Q96FV5; Q9UBM3; Q9UEX3 Q95748; Q53G14; Q53HL4; Q5JPB8; Q969H2; Q9BV67; Q9HAL6; Q9NY33 P20042; Q3B719; Q6IBR8; Q96I16; Q9BVU0; Q9UUE4 P02679; P04469; P04470; Q53Y18; Q7Z664; Q96A14; Q96KJ3 P49719; P62333; Q06IBU3; Q92524 P02748; Q9UGI4 Q95210 | ; PRS6B_HUMAN                                                                                                              |
| 791                        | IPI00019927                                                     | PSMD7             | 324                                  | 324  | 324  | 3.7E+04                               | 3.7E+04 | 3.7E+04 | 16.4            | 3                     | 0         | 1         | 0        | 0         | ISOFORM 1 OF DIPEPTIDYL-PEPTIDASE 3. EUKARYOTIC TRANSLATION INITIATION FACTOR 2 SUBUNIT 2.; SIMILAR TO EUKARYOTIC TRANSLATION INITIATION FACTOR 2 SUBUNIT 2.; EIF2S2 PROTEIN.                                                                                                                                                  | Q96E97                                                                                                                                                                                                                                                    | PSD7_HUMAN                                                                                                                 |
| 792                        | IPI00020042; IPI00738042                                        | LOC652826; PSMC4  | 414                                  | 418  | 416  | 4.7E+04                               | 4.7E+04 | 4.7E+04 | 28.7            | 9                     | 1         | 1         | 0        | 0         | ISOFORM GAMMA-B OF FIBRINOGEN GAMMA CHAIN PRECURSOR.; ISOFORM GAMMA-A OF FIBRINOGEN GAMMA CHAIN PRECURSOR.; HYPOTHETICAL PROTEIN DKFZP779N0926.                                                                                                                                                                                | P43686; Q96FV5; Q9UBM3; Q9UEX3 Q95748; Q53G14; Q53HL4; Q5JPB8; Q969H2; Q9BV67; Q9HAL6; Q9NY33 P20042; Q3B719; Q6IBR8; Q96I16; Q9BVU0; Q9UUE4 P02679; P04469; P04470; Q53Y18; Q7Z664; Q96A14; Q96KJ3 P49719; P62333; Q06IBU3; Q92524 P02748; Q9UGI4 Q95210 | ; PRS6B_HUMAN                                                                                                              |
| 793                        | IPI00020672                                                     | BBS1; DPP3        | 737                                  | 737  | 737  | 8.3E+04                               | 8.3E+04 | 8.3E+04 | 7.2             | 3                     | 1         | 1         | 0        | 0         | ISOFORM 1 OF DIPEPTIDYL-PEPTIDASE 3. EUKARYOTIC TRANSLATION INITIATION FACTOR 2 SUBUNIT 2.; SIMILAR TO EUKARYOTIC TRANSLATION INITIATION FACTOR 2 SUBUNIT 2.; EIF2S2 PROTEIN.                                                                                                                                                  | Q9UBA4 Q2NL95; Q53FM0; Q53G16; Q68D77; Q69YM2; Q6FIB7; Q6IAE0; Q7Z4W5; Q9H0U0; Q9HBZ9; Q9NUU7; Q9UMR2 P51665; Q6PK12; Q96E97                                                                                                                              | DPP3_HUMAN; Q53GT4_HUMAN; Q53HL4_HUMAN; Q5JPB8_HUMAN                                                                       |
| 794                        | IPI00021728; IPI00176637; IPI00793912                           | EIF2S2; LOC728350 | 327                                  | 333  | 330  | 3.8E+04                               | 3.8E+04 | 3.8E+04 | 14.1            | 3                     | 1         | 1         | 0        | 0         | ISOFORM GAMMA-B OF FIBRINOGEN GAMMA CHAIN PRECURSOR.; ISOFORM GAMMA-A OF FIBRINOGEN GAMMA CHAIN PRECURSOR.; HYPOTHETICAL PROTEIN DKFZP779N0926.                                                                                                                                                                                | P04470; Q53Y18; Q7Z664; Q96A14; Q96KJ3 P49719; P62333; Q06IBU3; Q92524 P02748; Q9UGI4 Q95210                                                                                                                                                              | ; IF2B_HUMAN; Q3B719_HUMAN; Q6IBR8_HUMAN; Q96I16_HUMAN                                                                     |
| 795                        | IPI00021891; IPI00219713; IPI00411626                           | FGG               | 406                                  | 453  | 432  | 4.6E+04                               | 5.2E+04 | 4.9E+04 | 15.9            | 5                     | 1         | 1         | 0        | 0         | 26S PROTEASE REGULATORY SUBUNIT S10B.                                                                                                                                                                                                                                                                                          | P43686; Q96FV5; Q9UBM3; Q9UEX3 Q95748; Q53G14; Q53HL4; Q5JPB8; Q969H2; Q9BV67; Q9HAL6; Q9NY33 P20042; Q3B719; Q6IBR8; Q96I16; Q9BVU0; Q9UUE4 P02679; P04469; P04470; Q53Y18; Q7Z664; Q96A14; Q96KJ3 P49719; P62333; Q06IBU3; Q92524 P02748; Q9UGI4 Q95210 | FIBG_HUMAN; Q53Y18_HUMAN; Q7Z664_HUMAN                                                                                     |
| 796                        | IPI00021926                                                     | PSMC6             | 389                                  | 389  | 389  | 4.4E+04                               | 4.4E+04 | 4.4E+04 | 7.5             | 2                     | 1         | 1         | 0        | 0         | COMPLEMENT COMPONENT C9 PRECURSOR.                                                                                                                                                                                                                                                                                             | P55010; Q05DF3; Q32Q19; Q53XB3; Q6IBU0; Q9H5N2; Q9UG48 P55036; Q5VWC5; Q9NS92                                                                                                                                                                             | PRS10_HUMAN                                                                                                                |
| 797                        | IPI00022395                                                     | C9                | 559                                  | 559  | 559  | 6.3E+04                               | 6.3E+04 | 6.3E+04 | 4.1             | 2                     | 0         | 1         | 0        | 0         | ALPHA-1B-GLYCOPROTEIN PRECURSOR.                                                                                                                                                                                                                                                                                               | P04217; Q8YJ6; Q96P39 Q35051; Q43208; P47210; P52915; P52916; P62195                                                                                                                                                                                      | C09_HUMAN; Q9UGI4_HUMAN                                                                                                    |
| 798                        | IPI00022538                                                     | GENX-3414         | 358                                  | 358  | 358  | 3.9E+04                               | 3.9E+04 | 3.9E+04 | 14.3            | 3                     | 0         | 1         | 0        | 0         | GENETHONIN-1.                                                                                                                                                                                                                                                                                                                  | Q95210                                                                                                                                                                                                                                                    | GET1_HUMAN                                                                                                                 |
| 799                        | IPI00022648                                                     | EIF5              | 431                                  | 431  | 431  | 4.9E+04                               | 4.9E+04 | 4.9E+04 | 10.4            | 4                     | 1         | 1         | 0        | 0         | EUKARYOTIC TRANSLATION INITIATION FACTOR 5. ISOFORM RPN10A OF 26S PROTEASOME NON-ATPASE REGULATORY SUBUNIT 4.                                                                                                                                                                                                                  | P55010; Q05DF3; Q32Q19; Q53XB3; Q6IBU0; Q9H5N2; Q9UG48 P55036; Q5VWC5; Q9NS92                                                                                                                                                                             | IF5_HUMAN; Q05DF3_HUMAN; Q32Q19_HUMAN; Q53XB3_HUMAN; Q6IBU0_HUMAN                                                          |
| 800                        | IPI00022694                                                     | PSMD4             | 377                                  | 377  | 377  | 4.1E+04                               | 4.1E+04 | 4.1E+04 | 9.3             | 2                     | 0         | 1         | 0        | 0         | ALPHA-1B-GLYCOPROTEIN PRECURSOR.                                                                                                                                                                                                                                                                                               | P04217; Q8YJ6; Q96P39 Q35051; Q43208; P47210; P52915; P52916; P62195                                                                                                                                                                                      | PSMD4_HUMAN                                                                                                                |
| 801                        | IPI00022895                                                     | A1BG              | 495                                  | 495  | 495  | 5.4E+04                               | 5.4E+04 | 5.4E+04 | 8.9             | 3                     | 1         | 1         | 0        | 0         | 26S PROTEASE REGULATORY SUBUNIT 8.; 45 KDA PROTEIN.                                                                                                                                                                                                                                                                            | P43686; Q96FV5; Q9UBM3; Q9UEX3 Q95748; Q53G14; Q53HL4; Q5JPB8; Q969H2; Q9BV67; Q9HAL6; Q9NY33 P20042; Q3B719; Q6IBR8; Q96I16; Q9BVU0; Q9UUE4 P02679; P04469; P04470; Q53Y18; Q7Z664; Q96A14; Q96KJ3 P49719; P62333; Q06IBU3; Q92524 P02748; Q9UGI4 Q95210 | A1BG_HUMAN                                                                                                                 |
| 802                        | IPI00023919; IPI00745502                                        | PSMC5             | 402                                  | 406  | 404  | 4.5E+04                               | 4.6E+04 | 4.5E+04 | 29.8            | 8                     | 1         | 1         | 0        | 0         | ISOFORM LONG OF GLUTARYL-COA DEHYDROGENASE, MITOCHONDRIAL PRECURSOR.                                                                                                                                                                                                                                                           | Q14719; Q92947 Q75131; Q05DL8; Q8YV41 Q59E54; Q68D27; Q96RQ3; Q9H959; Q9NS97                                                                                                                                                                              | ; PRS8_HUMAN                                                                                                               |
| 803                        | IPI00024317                                                     | GCDH              | 438                                  | 438  | 438  | 4.8E+04                               | 4.8E+04 | 4.8E+04 | 6.6             | 2                     | 0         | 1         | 0        | 0         | METHYLCROTONOYL-COA CARBOXYLASE SUBUNIT ALPHA, MITOCHONDRIAL PRECURSOR.; 48 KDA PROTEIN.; HYPOTHETICAL PROTEIN DKFZP686B20267. SHORT/BRANCHED CHAIN SPECIFIC ACYL-COA DEHYDROGENASE, MITOCHONDRIAL PRECURSOR.                                                                                                                  | Q14719; Q92947 Q75131; Q05DL8; Q8YV41 Q59E54; Q68D27; Q96RQ3; Q9H959; Q9NS97                                                                                                                                                                              | GCDH_HUMAN                                                                                                                 |
| 804                        | IPI00024403                                                     | CPNE3             | 537                                  | 537  | 537  | 6.0E+04                               | 6.0E+04 | 6.0E+04 | 7.3             | 3                     | 1         | 1         | 0        | 0         | ISOFORM LONG OF GLUTARYL-COA DEHYDROGENASE, MITOCHONDRIAL PRECURSOR.                                                                                                                                                                                                                                                           | Q14719; Q92947 Q75131; Q05DL8; Q8YV41 Q59E54; Q68D27; Q96RQ3; Q9H959; Q9NS97                                                                                                                                                                              | CPNE3_HUMAN; Q05DL8_HUMAN                                                                                                  |
| 805                        | IPI00024580; IPI00789136; IPI00792499                           | MCCC1             | 434                                  | 725  | 592  | 4.8E+04                               | 8.0E+04 | 6.6E+04 | 11.1            | 3                     | 0         | 1         | 0        | 0         | METHYLMALONYL-COA MUTASE, MITOCHONDRIAL PRECURSOR.                                                                                                                                                                                                                                                                             | P45954; Q5SQN6; Q96CK7 P22033; Q59HB4; Q5SY23; Q96B11; Q9UD64                                                                                                                                                                                             | ; MCCA_HUMAN; Q68D27_HUMAN                                                                                                 |
| 806                        | IPI00024623                                                     | ACADSB            | 432                                  | 432  | 432  | 4.7E+04                               | 4.7E+04 | 4.7E+04 | 11.6            | 3                     | 1         | 1         | 0        | 0         | ACADSB_HUMAN; Q5SQN6_HUMAN                                                                                                                                                                                                                                                                                                     |                                                                                                                                                                                                                                                           |                                                                                                                            |
| 807                        | IPI00024934                                                     | MUT               | 750                                  | 750  | 750  | 8.3E+04                               | 8.3E+04 | 8.3E+04 | 9.3             | 6                     | 1         | 1         | 0        | 0         | METHYLMALONYL-COA MUTASE, MITOCHONDRIAL PRECURSOR.                                                                                                                                                                                                                                                                             | P45954; Q5SQN6; Q96CK7 P22033; Q59HB4; Q5SY23; Q96B11; Q9UD64                                                                                                                                                                                             | MUTA_HUMAN; Q59HB4_HUMAN                                                                                                   |

| Protein Group* | IPI ID                                                          | IPI gene name | Amino Acids in Sequence <sup>1</sup> |      |      | Protein Molecular Weight <sup>1</sup> |         |         | Seq. Cov. (max) | Unique Peptides (max) | Detection |           |          |           | Protein name                                                                                                                                                                  | Uniprot Id                                                                                                                                                                                                      | Uniprot Entry Name                                                                                                                                                                                                                                                                                                                                                                                                                             |
|----------------|-----------------------------------------------------------------|---------------|--------------------------------------|------|------|---------------------------------------|---------|---------|-----------------|-----------------------|-----------|-----------|----------|-----------|-------------------------------------------------------------------------------------------------------------------------------------------------------------------------------|-----------------------------------------------------------------------------------------------------------------------------------------------------------------------------------------------------------------|------------------------------------------------------------------------------------------------------------------------------------------------------------------------------------------------------------------------------------------------------------------------------------------------------------------------------------------------------------------------------------------------------------------------------------------------|
|                |                                                                 |               | Min.                                 | Max. | Mean | Min.                                  | Max.    | Mean    |                 |                       | Expt. I-1 | Expt. I-2 | Expt. II | Expt. III |                                                                                                                                                                               |                                                                                                                                                                                                                 |                                                                                                                                                                                                                                                                                                                                                                                                                                                |
| 808            | IPI00026813; IPI00607601; IPI00607790                           | FNTA          | 288                                  | 379  | 326  | 3.5E+04                               | 4.4E+04 | 3.9E+04 | 11.2            | 3                     | 1         | 1         | 0        | 0         | PROTEIN FARNESYLTRANSFERASE/GERANYLGERANYLTRANSFERASE TYPE I ALPHA SUBUNIT.; FARNESYLTRANSFERASE, CAAX BOX, ALPHA ISOFORM C.; FARNESYLTRANSFERASE, CAAX BOX, ALPHA ISOFORM B. | P49354; O53XJ9; Q9UDC1; P32391; P61158; O53QM2; Q59FV6                                                                                                                                                          | ; PFTA_HUMAN; O53XJ9_HUMAN; ARP3_HUMAN; O53QM2_HUMAN; Q59FV6_HUMAN                                                                                                                                                                                                                                                                                                                                                                             |
| 809            | IPI00028091                                                     | ACTR3         | 418                                  | 418  | 418  | 4.7E+04                               | 4.7E+04 | 4.7E+04 | 16.8            | 4                     | 1         | 1         | 0        | 0         | ACTIN-LIKE PROTEIN 3.                                                                                                                                                         | Q0VAH3; Q4W5A9; Q8WTS6; Q9C0E6                                                                                                                                                                                  | Q4W5A9_HUMAN; SETD7_HUMAN                                                                                                                                                                                                                                                                                                                                                                                                                      |
| 810            | IPI00028366                                                     | SETD7         | 366                                  | 366  | 366  | 4.1E+04                               | 4.1E+04 | 4.1E+04 | 11.2            | 3                     | 1         | 1         | 0        | 0         | HISTONE-LYSINE N-METHYLTRANSFERASE, H3 LYSINE-4 SPECIFIC SET7.                                                                                                                | Q2M2V8; Q2YD99; Q658W8; Q8N5V9; Q88M55; Q9C0E8                                                                                                                                                                  | Q4W5A9_HUMAN; SETD7_HUMAN                                                                                                                                                                                                                                                                                                                                                                                                                      |
| 811            | IPI00028369; IPI00784901; IPI00785171                           | KIAA1715      | 305                                  | 428  | 385  | 3.3E+04                               | 4.8E+04 | 4.3E+04 | 6.1             | 2                     | 0         | 1         | 0        | 0         | ISOFORM 1 OF PROTEIN LUNAPARK.; ISOFORM 3 OF PROTEIN LUNAPARK.; ISOFORM 2 OF PROTEIN LUNAPARK.                                                                                | O00653; Q05B50; Q14152; Q15778; Q24JU4; Q3B770; Q5T5X0; Q6P1R0; Q7Z5T5                                                                                                                                          | LNP_HUMAN                                                                                                                                                                                                                                                                                                                                                                                                                                      |
| 812            | IPI00029012                                                     | EIF3S10       | 1382                                 | 1382 | 1382 | 1.7E+05                               | 1.7E+05 | 1.7E+05 | 2.0             | 2                     | 0         | 1         | 0        | 0         | EUKARYOTIC TRANSLATION INITIATION FACTOR 3 SUBUNIT 10.                                                                                                                        | Q53SX1; Q580W8; Q59GY5; Q86YW8; Q9HCC4; Q9HCC5; Q9HDD2; Q9NVE9; Q8NYL2                                                                                                                                          | IF3A_HUMAN; Q05B50_HUMAN; Q24JU4_HUMAN; Q3B770_HUMAN; Q5T5X0_HUMAN; Q6P1R0_HUMAN; Q7Z5T5_HUMAN                                                                                                                                                                                                                                                                                                                                                 |
| 813            | IPI00029643                                                     | ZAK           | 455                                  | 455  | 455  | 5.2E+04                               | 5.2E+04 | 5.2E+04 | 8.4             | 3                     | 1         | 1         | 0        | 0         | ISOFORM 2 OF MITOGEN-ACTIVATED PROTEIN KINASE KINASE KINASE MLT.                                                                                                              | P26196; Q5D048; Q8IV96                                                                                                                                                                                          | MLTK_HUMAN                                                                                                                                                                                                                                                                                                                                                                                                                                     |
| 814            | IPI00030320                                                     | DDX6          | 483                                  | 483  | 483  | 5.4E+04                               | 5.4E+04 | 5.4E+04 | 7.5             | 2                     | 0         | 1         | 0        | 0         | PROBABLE ATP-DEPENDENT RNA HELICASE DDX6.                                                                                                                                     | P16930; Q53XA7; A0JLU4; P16990; P16991; P67809; Q05D43; Q14972;                                                                                                                                                 | DDX6_HUMAN; Q8IV96_HUMAN                                                                                                                                                                                                                                                                                                                                                                                                                       |
| 815            | IPI00031708; IPI00793664                                        | FAH           | 295                                  | 419  | 357  | 3.3E+04                               | 4.6E+04 | 4.0E+04 | 12.2            | 4                     | 1         | 1         | 0        | 0         | FUMARYLACETOACETASE.; 33 KDA PROTEIN.                                                                                                                                         | Q15325; Q5FV0; Q6PKI6                                                                                                                                                                                           | ; FAAA_HUMAN; Q53XA7_HUMAN                                                                                                                                                                                                                                                                                                                                                                                                                     |
| 816            | IPI00031812; IPI00385699; IPI00643351                           | YBX1          | 315                                  | 374  | 338  | 3.5E+04                               | 4.2E+04 | 3.8E+04 | 27.5            | 4                     | 1         | 1         | 0        | 0         | NUCLEASE SENSITIVE ELEMENT-BINDING PROTEIN 1.; 35 KDA PROTEIN.; PROTEIN.                                                                                                      | Q15325; Q5FV0; Q6PKI6                                                                                                                                                                                           | ; A0JLU4_HUMAN; Q05D43_HUMAN; Q6PKI6_HUMAN; YBOX1_HUMAN                                                                                                                                                                                                                                                                                                                                                                                        |
| 817            | IPI00031820                                                     | FARSA         | 508                                  | 508  | 508  | 5.8E+04                               | 5.8E+04 | 5.8E+04 | 5.5             | 2                     | 0         | 1         | 0        | 0         | PHENYLALANYL-TRNA SYNTHETASE ALPHA CHAIN.                                                                                                                                     | Q6IBR2; Q9NSD8; Q9Y285; Q9Y4V8; Q5TC78; Q7KYQ5; Q7KYY4; Q7KZ97; Q8IZZ8; Q8IZZ9; Q8J000; Q8J001; Q8TCE1; Q9UBW9; Q9UE54                                                                                          | Q6IBR2_HUMAN; SYFA_HUMAN; Q5TC78_HUMAN; Q7KYQ5_HUMAN; Q7KYY4_HUMAN; Q7KZ97_HUMAN; Q8IZZ8_HUMAN; Q8IZZ9_HUMAN; Q8J000_HUMAN; Q8J001_HUMAN; Q8TCE1_HUMAN; Q9UBW9_HUMAN; Q9UE54_HUMAN                                                                                                                                                                                                                                                             |
| 818            | IPI00032179                                                     | SERPINC1      | 465                                  | 465  | 465  | 5.3E+04                               | 5.3E+04 | 5.3E+04 | 18.5            | 5                     | 1         | 1         | 0        | 0         | ANTITHROMBIN III VARIANT.                                                                                                                                                     | Q16181; Q309B3; Q3B7A3; Q3LIE9; Q52M76; Q59EY4; Q5JXL7; Q6NX50; Q8TC62                                                                                                                                          | ; A0JLU4_HUMAN; Q05D43_HUMAN; Q6PKI6_HUMAN; YBOX1_HUMAN                                                                                                                                                                                                                                                                                                                                                                                        |
| 819            | IPI00033025; IPI00552502; IPI00816201                           | SEPT7         | 418                                  | 438  | 431  | 4.9E+04                               | 5.1E+04 | 5.0E+04 | 4.3             | 2                     | 0         | 1         | 0        | 0         | ISOFORM 1 OF SEPTIN-7.; CELL DIVISION CYCLE 10 ISOFORM 2.; ISOFORM 2 OF SEPTIN-7.                                                                                             | P02724; Q03867; Q03870; Q13030; Q14419; Q14420; Q14421; Q14423; Q14424; Q14438; Q14440; Q14446; Q16308; Q16336; Q59HE6; Q59HE7; Q6IVB37; Q7KZ29; Q8WTS2; Q8WWP1; Q8WWP2; Q8WWP3; Q8WWP4; Q8BS11; Q9BZD9; Q9UM93 | Q3B7A3_HUMAN; Q3LIE9_HUMAN; Q59EY4_HUMAN; Q5JXL7_HUMAN; Q8TC62_HUMAN; SEPT7_HUMAN; GLPA_HUMAN; Q03867_HUMAN; Q03870_HUMAN; Q13030_HUMAN; Q14419_HUMAN; Q14420_HUMAN; Q14421_HUMAN; Q14423_HUMAN; Q14424_HUMAN; Q14438_HUMAN; Q14440_HUMAN; Q14446_HUMAN; Q16308_HUMAN; Q16336_HUMAN; Q59HE6_HUMAN; Q59HE7_HUMAN; Q6IVB37_HUMAN; Q7KZ29_HUMAN; Q8WTS2_HUMAN; Q8WWP1_HUMAN; Q8WWP2_HUMAN; Q8WWP3_HUMAN; Q8WWP4_HUMAN; Q9BZD9_HUMAN; Q9UM93_HUMAN |
| 820            | IPI00043073; IPI00178745; IPI00298800; IPI00384414              | GYPA          | 85                                   | 150  | 115  | 9.3E+03                               | 1.6E+04 | 1.2E+04 | 29.5            | 2                     | 1         | 1         | 0        | 0         | GLYCOPHORIN ERIK (STA) PRECURSOR.; GLYCOPHORIN MZ II-V.; GLYCOPHORIN A PRECURSOR.; GLYCOPHORIN ERIK I-IV PRECURSOR.                                                           | Q8WWP2; Q8WWP3; Q8WWP4; Q8BS11; Q9BZD9; Q9UM93                                                                                                                                                                  | Q8WWP2_HUMAN; Q8WWP3_HUMAN; Q8WWP4_HUMAN; Q9BZD9_HUMAN; Q9UM93_HUMAN                                                                                                                                                                                                                                                                                                                                                                           |
| 821            | IPI00065491; IPI00748058                                        | STAC3         | 325                                  | 364  | 345  | 3.7E+04                               | 4.2E+04 | 3.9E+04 | 13.2            | 5                     | 1         | 1         | 0        | 0         | ISOFORM 1 OF SH3 AND CYSTEINE-RICH DOMAIN-CONTAINING PROTEIN 3.; ISOFORM 2 OF SH3 AND CYSTEINE-RICH DOMAIN-CONTAINING PROTEIN 3.                                              | Q96HU5; Q96MF2                                                                                                                                                                                                  | STAC3_HUMAN                                                                                                                                                                                                                                                                                                                                                                                                                                    |
| 822            | IPI00075080; IPI00219941                                        | OSBPL1A       | 437                                  | 950  | 694  | 5.0E+04                               | 1.1E+05 | 7.9E+04 | 7.6             | 3                     | 1         | 1         | 0        | 0         | ISOFORM B OF OXYSTEROL-BINDING PROTEIN-RELATED PROTEIN 1.; ISOFORM A OF OXYSTEROL-BINDING PROTEIN-RELATED PROTEIN 1.                                                          | Q6DKJ0; Q6GSK5; Q96IZ3; Q96XW6; Q9BZF5; Q9NWR7; Q95195; Q32CV5; Q6NUH7; Q66VX8; Q8WUQ1; Q96I99; Q8N4P7; Q8NCC1; Q9H1E5; Q9UJA1; Q9ULQ8                                                                          | OSBPL1_HUMAN; Q6DKJ0_HUMAN; Q6GSK5_HUMAN; Q96IZ3_HUMAN                                                                                                                                                                                                                                                                                                                                                                                         |
| 823            | IPI00096066                                                     | SUCLG2        | 432                                  | 432  | 432  | 4.7E+04                               | 4.7E+04 | 4.7E+04 | 11.8            | 5                     | 1         | 1         | 0        | 0         | SUCCINYL-COA LIGASE [GDP-FORMING] BETA-CHAIN, MITOCHONDRIAL PRECURSOR.                                                                                                        | Q6NUH7; Q66VX8; Q8WUQ1; Q96I99; Q8N4P7; Q8NCC1; Q9H1E5; Q9UJA1; Q9ULQ8                                                                                                                                          | Q32CW5_HUMAN; SUCB2_HUMAN                                                                                                                                                                                                                                                                                                                                                                                                                      |
| 824            | IPI00100247                                                     | TXNDC13       | 349                                  | 349  | 349  | 3.9E+04                               | 3.9E+04 | 3.9E+04 | 7.2             | 2                     | 0         | 1         | 0        | 0         | THIOREDOXIN DOMAIN-CONTAINING PROTEIN 13 PRECURSOR.                                                                                                                           | Q9H1E5; Q9UJA1; Q9ULQ8                                                                                                                                                                                          | TXD13_HUMAN                                                                                                                                                                                                                                                                                                                                                                                                                                    |
| 825            | IPI00100292; IPI00168532; IPI00252412; IPI00744937; IPI00746278 | NPEPL1; STX16 | 412                                  | 523  | 487  | 4.4E+04                               | 5.6E+04 | 5.2E+04 | 5.2             | 2                     | 0         | 1         | 0        | 0         | ISOFORM 1 OF PROBABLE AMINOPEPTIDASE NPEPL1.; ISOFORM 3 OF PROBABLE AMINOPEPTIDASE NPEPL1.; ISOFORM 2 OF PROBABLE AMINOPEPTIDASE NPEPL1.; 52 KDA PROTEIN.; 56 KDA PROTEIN.    | Q53G37; Q5W083; Q8NDH3; Q8TF28; Q8WU12; Q9H1T6; Q9HA15                                                                                                                                                          | ; PEPL1_HUMAN                                                                                                                                                                                                                                                                                                                                                                                                                                  |
| 826            | IPI00101405; IPI00797614                                        | FDPS          | 353                                  | 419  | 386  | 4.1E+04                               | 4.8E+04 | 4.4E+04 | 7.9             | 2                     | 0         | 1         | 0        | 0         | FARNESYL DIPHOSPHATE SYNTHASE.; FARNESYL PYROPHOSPHATE SYNTHETASE.                                                                                                            | P14324; Q96G29                                                                                                                                                                                                  | FPPS_HUMAN; Q96G29_HUMAN                                                                                                                                                                                                                                                                                                                                                                                                                       |
| 827            | IPI00105598                                                     | PSMD11        | 423                                  | 423  | 423  | 4.8E+04                               | 4.8E+04 | 4.8E+04 | 18.7            | 6                     | 1         | 1         | 0        | 0         | PROTEASOME 26S NON-ATPASE SUBUNIT 11 VARIANT (FRAGMENT).                                                                                                                      | Q53FT5; Q13035; Q58KZ7; Q96A39; Q99536; Q9BU8                                                                                                                                                                   | Q53FT5_HUMAN                                                                                                                                                                                                                                                                                                                                                                                                                                   |
| 828            | IPI00156689                                                     | VAT1          | 393                                  | 393  | 393  | 4.2E+04                               | 4.2E+04 | 4.2E+04 | 7.9             | 2                     | 1         | 1         | 0        | 0         | SYNAPTIC VESICLE MEMBRANE PROTEIN VAT-1 HOMOLOG.                                                                                                                              | Q96A39; Q99536; Q9BU8                                                                                                                                                                                           | VAT1_HUMAN                                                                                                                                                                                                                                                                                                                                                                                                                                     |
| 829            | IPI00163230                                                     | COPS6         | 327                                  | 327  | 327  | 3.6E+04                               | 3.6E+04 | 3.6E+04 | 9.5             | 2                     | 1         | 1         | 0        | 0         | COP9 SIGNALOSOME COMPLEX SUBUNIT 6.                                                                                                                                           | O15387; Q7L5N1                                                                                                                                                                                                  | CSN6_HUMAN                                                                                                                                                                                                                                                                                                                                                                                                                                     |

| Protein Group <sup>a</sup> | IPI ID                                                                                                              | IPI gene name | Amino Acids in Sequence <sup>b</sup> |      |      | Protein Molecular Weight <sup>c</sup> |         |         | Seq. Cov. (max) | Unique Peptides (max) | Detection |           |          |           | Protein name                                                                                                                                                                                                                                                                                                                                                                                                                                                                                                                                                                                                                                                                                                                                                                                                                                                                                                                                                                                                                                                                                                                                                                                                                                                                                                                                                                                              | Uniprot Id                                                                                                     | Uniprot Entry Name                                                                                                                                        |
|----------------------------|---------------------------------------------------------------------------------------------------------------------|---------------|--------------------------------------|------|------|---------------------------------------|---------|---------|-----------------|-----------------------|-----------|-----------|----------|-----------|-----------------------------------------------------------------------------------------------------------------------------------------------------------------------------------------------------------------------------------------------------------------------------------------------------------------------------------------------------------------------------------------------------------------------------------------------------------------------------------------------------------------------------------------------------------------------------------------------------------------------------------------------------------------------------------------------------------------------------------------------------------------------------------------------------------------------------------------------------------------------------------------------------------------------------------------------------------------------------------------------------------------------------------------------------------------------------------------------------------------------------------------------------------------------------------------------------------------------------------------------------------------------------------------------------------------------------------------------------------------------------------------------------------|----------------------------------------------------------------------------------------------------------------|-----------------------------------------------------------------------------------------------------------------------------------------------------------|
|                            |                                                                                                                     |               | Min.                                 | Max. | Mean | Min.                                  | Max.    | Mean    |                 |                       | Expt. I-1 | Expt. I-2 | Expt. II | Expt. III |                                                                                                                                                                                                                                                                                                                                                                                                                                                                                                                                                                                                                                                                                                                                                                                                                                                                                                                                                                                                                                                                                                                                                                                                                                                                                                                                                                                                           |                                                                                                                |                                                                                                                                                           |
| 830                        | IPI00164528                                                                                                         | SNTA1         | 505                                  | 505  | 505  | 5.4E+04                               | 5.4E+04 | 5.4E+04 | 11.1            | 3                     | 0         | 1         | 0        | 0         | ALPHA-1-SYNTROPHIN; SEC1 FAMILY DOMAIN-CONTAINING PROTEIN 1.; VESICLE TRANSPORT-RELATED PROTEIN ISOFORM B.; VESICLE TRANSPORT-RELATED PROTEIN ISOFORM A VARIANT (FRAGMENT).                                                                                                                                                                                                                                                                                                                                                                                                                                                                                                                                                                                                                                                                                                                                                                                                                                                                                                                                                                                                                                                                                                                                                                                                                               | Q13424; Q16438; Q29RY0                                                                                         | Q29RY0_HUMAN; SNTA1_HUMAN                                                                                                                                 |
| 831                        | IPI00165261; IPI00374338; IPI00794956                                                                               | SCFD1         | 575                                  | 642  | 620  | 6.5E+04                               | 7.2E+04 | 7.0E+04 | 10.1            | 4                     | 1         | 1         | 0        | 0         | IGHA1 PROTEIN.; CDNA FLJ14473 FIS. CLONE MAMMA1001080, HIGHLY SIMILAR TO HOMO SAPIENSNC73 PROTEIN (SNC73) MRNA. ISOFORM 1 OF ZINC-BINDING ALCOHOL DEHYDROGENASE DOMAIN-CONTAINING PROTEIN 1.; SIMILAR TO ZINC BINDING ALCOHOL DEHYDROGENASE, DOMAIN CONTAINING 1.                                                                                                                                                                                                                                                                                                                                                                                                                                                                                                                                                                                                                                                                                                                                                                                                                                                                                                                                                                                                                                                                                                                                         | Q8VVM8; Q9BZ13; Q9UNL3; Q9Y6A8                                                                                 | ; Q53GW1_HUMAN; SCFD1_HUMAN                                                                                                                               |
| 832                        | IPI00166866; IPI00386879                                                                                            | IGHA1         | 494                                  | 499  | 497  | 5.3E+04                               | 5.3E+04 | 5.3E+04 | 12.6            | 4                     | 0         | 1         | 0        | 0         | IGHA1 PROTEIN.; CDNA FLJ14473 FIS. CLONE MAMMA1001080, HIGHLY SIMILAR TO HOMO SAPIENSNC73 PROTEIN (SNC73) MRNA. ISOFORM 1 OF ZINC-BINDING ALCOHOL DEHYDROGENASE DOMAIN-CONTAINING PROTEIN 1.; SIMILAR TO ZINC BINDING ALCOHOL DEHYDROGENASE, DOMAIN CONTAINING 1.                                                                                                                                                                                                                                                                                                                                                                                                                                                                                                                                                                                                                                                                                                                                                                                                                                                                                                                                                                                                                                                                                                                                         | Q8N5K4; Q96K68                                                                                                 | Q8N5K4_HUMAN; Q96K68_HUMAN                                                                                                                                |
| 833                        | IPI00167515; IPI00745895                                                                                            | ZADH1         | 287                                  | 351  | 319  | 3.2E+04                               | 3.8E+04 | 3.5E+04 | 22.3            | 4                     | 1         | 1         | 0        | 0         | HYPOTHETICAL PROTEIN DKFZP686J1643. ISOFORM 4 OF CALCIUM/CALMODULIN-DEPENDENT PROTEIN KINASE TYPE II GAMMACHAIN.; CALCIUM/CALMODULIN-DEPENDENT PROTEIN KINASE II GAMMA ISOFORM 6.; CALCIUM/CALMODULIN-DEPENDENT PROTEIN KINASE II GAMMA ISOFORM 1.; CALCIUM/CALMODULIN-DEPENDENT PROTEIN KINASE II GAMMA ISOFORM 2.; ISOFORM 1 OF CALCIUM/CALMODULIN-DEPENDENT PROTEIN KINASE TYPE II GAMMACHAIN.; CALCIUM/CALMODULIN-DEPENDENT PROTEIN KINASE II GAMMA ISOFORM 4.; ISOFORM 3 OF CALCIUM/CALMODULIN-DEPENDENT PROTEIN KINASE TYPE II GAMMACHAIN.; CALCIUM/CALMODULIN-DEPENDENT PROTEIN KINASE (CAM KINASE) II GAMMA. ISOFORM DELTA 6 OF CALCIUM/CALMODULIN-DEPENDENT PROTEIN KINASE TYPE IIDELTA CHAIN.; ISOFORM DELTA 2 OF CALCIUM/CALMODULIN-DEPENDENT PROTEIN KINASE TYPE IIDELTA CHAIN.; ISOFORM DELTA 10 OF CALCIUM/CALMODULIN-DEPENDENT PROTEIN KINASE TYPEII DELTA CHAIN.; ISOFORM DELTA 7 OF CALCIUM/CALMODULIN-DEPENDENT PROTEIN KINASE TYPE IIDELTA CHAIN.; ISOFORM DELTA 11 OF CALCIUM/CALMODULIN-DEPENDENT PROTEIN KINASE TYPEII DELTA CHAIN.; ISOFORM DELTA 3 OF CALCIUM/CALMODULIN-DEPENDENT PROTEIN KINASE TYPE IIDELTA CHAIN.; ISOFORM DELTA 4 OF CALCIUM/CALMODULIN-DEPENDENT PROTEIN KINASE TYPE IIDELTA CHAIN.; ISOFORM DELTA 8 OF CALCIUM/CALMODULIN-DEPENDENT PROTEIN KINASE TYPE IIDELTA CHAIN.; ISOFORM DELTA 9 OF CALCIUM/CALMODULIN-DEPENDENT PROTEIN KINASE TYPE IIDELTA CHAIN. | Q3L8A4; Q6MZH8; Q8N8N7                                                                                         | ; Q3L8A4_HUMAN; ZADH1_HUMAN                                                                                                                               |
| 834                        | IPI00168407                                                                                                         | P DPR         | 879                                  | 879  | 879  | 9.9E+04                               | 9.9E+04 | 9.9E+04 | 3.4             | 2                     | 0         | 1         | 0        | 0         | HYPOTHETICAL PROTEIN DKFZP686J1643. ISOFORM 4 OF CALCIUM/CALMODULIN-DEPENDENT PROTEIN KINASE TYPE II GAMMACHAIN.; CALCIUM/CALMODULIN-DEPENDENT PROTEIN KINASE II GAMMA ISOFORM 6.; CALCIUM/CALMODULIN-DEPENDENT PROTEIN KINASE II GAMMA ISOFORM 1.; CALCIUM/CALMODULIN-DEPENDENT PROTEIN KINASE II GAMMA ISOFORM 2.; ISOFORM 1 OF CALCIUM/CALMODULIN-DEPENDENT PROTEIN KINASE TYPE II GAMMACHAIN.; CALCIUM/CALMODULIN-DEPENDENT PROTEIN KINASE II GAMMA ISOFORM 4.; ISOFORM 3 OF CALCIUM/CALMODULIN-DEPENDENT PROTEIN KINASE TYPE II GAMMACHAIN.; CALCIUM/CALMODULIN-DEPENDENT PROTEIN KINASE (CAM KINASE) II GAMMA. ISOFORM DELTA 6 OF CALCIUM/CALMODULIN-DEPENDENT PROTEIN KINASE TYPE IIDELTA CHAIN.; ISOFORM DELTA 2 OF CALCIUM/CALMODULIN-DEPENDENT PROTEIN KINASE TYPE IIDELTA CHAIN.; ISOFORM DELTA 10 OF CALCIUM/CALMODULIN-DEPENDENT PROTEIN KINASE TYPEII DELTA CHAIN.; ISOFORM DELTA 7 OF CALCIUM/CALMODULIN-DEPENDENT PROTEIN KINASE TYPE IIDELTA CHAIN.; ISOFORM DELTA 11 OF CALCIUM/CALMODULIN-DEPENDENT PROTEIN KINASE TYPEII DELTA CHAIN.; ISOFORM DELTA 3 OF CALCIUM/CALMODULIN-DEPENDENT PROTEIN KINASE TYPE IIDELTA CHAIN.; ISOFORM DELTA 4 OF CALCIUM/CALMODULIN-DEPENDENT PROTEIN KINASE TYPE IIDELTA CHAIN.; ISOFORM DELTA 8 OF CALCIUM/CALMODULIN-DEPENDENT PROTEIN KINASE TYPE IIDELTA CHAIN.; ISOFORM DELTA 9 OF CALCIUM/CALMODULIN-DEPENDENT PROTEIN KINASE TYPE IIDELTA CHAIN. | Q8NCN5                                                                                                         | Q8NCN5_HUMAN                                                                                                                                              |
| 835                        | IPI00172450; IPI00172452; IPI00216378; IPI00296678; IPI00334344; IPI00336118; IPI00556423; IPI00646849              | CAMK2G        | 495                                  | 558  | 526  | 5.6E+04                               | 6.3E+04 | 5.9E+04 | 12.5            | 5                     | 1         | 1         | 0        | 0         | HYPOTHETICAL PROTEIN DKFZP686J1643. ISOFORM 4 OF CALCIUM/CALMODULIN-DEPENDENT PROTEIN KINASE TYPE II GAMMACHAIN.; CALCIUM/CALMODULIN-DEPENDENT PROTEIN KINASE II GAMMA ISOFORM 6.; CALCIUM/CALMODULIN-DEPENDENT PROTEIN KINASE II GAMMA ISOFORM 1.; CALCIUM/CALMODULIN-DEPENDENT PROTEIN KINASE II GAMMA ISOFORM 2.; ISOFORM 1 OF CALCIUM/CALMODULIN-DEPENDENT PROTEIN KINASE TYPE II GAMMACHAIN.; CALCIUM/CALMODULIN-DEPENDENT PROTEIN KINASE II GAMMA ISOFORM 4.; ISOFORM 3 OF CALCIUM/CALMODULIN-DEPENDENT PROTEIN KINASE TYPE II GAMMACHAIN.; CALCIUM/CALMODULIN-DEPENDENT PROTEIN KINASE (CAM KINASE) II GAMMA. ISOFORM DELTA 6 OF CALCIUM/CALMODULIN-DEPENDENT PROTEIN KINASE TYPE IIDELTA CHAIN.; ISOFORM DELTA 2 OF CALCIUM/CALMODULIN-DEPENDENT PROTEIN KINASE TYPE IIDELTA CHAIN.; ISOFORM DELTA 10 OF CALCIUM/CALMODULIN-DEPENDENT PROTEIN KINASE TYPEII DELTA CHAIN.; ISOFORM DELTA 7 OF CALCIUM/CALMODULIN-DEPENDENT PROTEIN KINASE TYPE IIDELTA CHAIN.; ISOFORM DELTA 11 OF CALCIUM/CALMODULIN-DEPENDENT PROTEIN KINASE TYPEII DELTA CHAIN.; ISOFORM DELTA 3 OF CALCIUM/CALMODULIN-DEPENDENT PROTEIN KINASE TYPE IIDELTA CHAIN.; ISOFORM DELTA 4 OF CALCIUM/CALMODULIN-DEPENDENT PROTEIN KINASE TYPE IIDELTA CHAIN.; ISOFORM DELTA 8 OF CALCIUM/CALMODULIN-DEPENDENT PROTEIN KINASE TYPE IIDELTA CHAIN.; ISOFORM DELTA 9 OF CALCIUM/CALMODULIN-DEPENDENT PROTEIN KINASE TYPE IIDELTA CHAIN. | Q00561; Q15378; Q13279; Q13280; Q13282; Q13555; Q13556; Q5SQZ3; Q5SQZ4; Q5SWX3; Q5SWX4; Q7KYX5; Q8N4I3; Q8N1A4 | ; KCC2G_HUMAN; Q00561_HUMAN; Q13279_HUMAN; Q13280_HUMAN; Q13282_HUMAN; Q5SQZ3_HUMAN; Q5SWX3_HUMAN; Q5SWX4_HUMAN; Q7KYX5_HUMAN; Q8N4I3_HUMAN; Q8N1A4_HUMAN |
| 836                        | IPI00172636; IPI00430291; IPI00827573; IPI00827606; IPI00827625; IPI00827717; IPI00828081; IPI00828139; IPI00828178 | CAMK2D        | 478                                  | 518  | 499  | 5.4E+04                               | 5.8E+04 | 5.6E+04 | 15.0            | 5                     | 1         | 1         | 0        | 0         | HYPOTHETICAL PROTEIN DKFZP686J1643. ISOFORM 4 OF CALCIUM/CALMODULIN-DEPENDENT PROTEIN KINASE TYPE II GAMMACHAIN.; CALCIUM/CALMODULIN-DEPENDENT PROTEIN KINASE II GAMMA ISOFORM 6.; CALCIUM/CALMODULIN-DEPENDENT PROTEIN KINASE II GAMMA ISOFORM 1.; CALCIUM/CALMODULIN-DEPENDENT PROTEIN KINASE II GAMMA ISOFORM 2.; ISOFORM 1 OF CALCIUM/CALMODULIN-DEPENDENT PROTEIN KINASE TYPE II GAMMACHAIN.; CALCIUM/CALMODULIN-DEPENDENT PROTEIN KINASE II GAMMA ISOFORM 4.; ISOFORM 3 OF CALCIUM/CALMODULIN-DEPENDENT PROTEIN KINASE TYPE II GAMMACHAIN.; CALCIUM/CALMODULIN-DEPENDENT PROTEIN KINASE (CAM KINASE) II GAMMA. ISOFORM DELTA 6 OF CALCIUM/CALMODULIN-DEPENDENT PROTEIN KINASE TYPE IIDELTA CHAIN.; ISOFORM DELTA 2 OF CALCIUM/CALMODULIN-DEPENDENT PROTEIN KINASE TYPE IIDELTA CHAIN.; ISOFORM DELTA 10 OF CALCIUM/CALMODULIN-DEPENDENT PROTEIN KINASE TYPEII DELTA CHAIN.; ISOFORM DELTA 7 OF CALCIUM/CALMODULIN-DEPENDENT PROTEIN KINASE TYPE IIDELTA CHAIN.; ISOFORM DELTA 11 OF CALCIUM/CALMODULIN-DEPENDENT PROTEIN KINASE TYPEII DELTA CHAIN.; ISOFORM DELTA 3 OF CALCIUM/CALMODULIN-DEPENDENT PROTEIN KINASE TYPE IIDELTA CHAIN.; ISOFORM DELTA 4 OF CALCIUM/CALMODULIN-DEPENDENT PROTEIN KINASE TYPE IIDELTA CHAIN.; ISOFORM DELTA 8 OF CALCIUM/CALMODULIN-DEPENDENT PROTEIN KINASE TYPE IIDELTA CHAIN.; ISOFORM DELTA 9 OF CALCIUM/CALMODULIN-DEPENDENT PROTEIN KINASE TYPE IIDELTA CHAIN. | Q13557; Q52PK4; Q59G21; Q8N553; Q9UGH6; Q9UOE9                                                                 | KCC2D_HUMAN                                                                                                                                               |
| 837                        | IPI00179057; IPI00480142; IPI00643885; IPI00644450                                                                  | CUL4B         | 234                                  | 917  | 737  | 2.8E+04                               | 1.0E+05 | 8.4E+04 | 2.1             | 2                     | 0         | 1         | 0        | 0         | ISOFORM 1 OF CULLIN-4B.; ISOFORM 2 OF CULLIN-4B.; 103 KDA PROTEIN.; 28 KDA PROTEIN. ISOFORM 1 OF SERINE/THREONINE-PROTEIN PHOSPHATASE 2B CATALYTIC SUBUNITALPHA ISOFORM.; ISOFORM 2 OF SERINE/THREONINE-PROTEIN PHOSPHATASE 2B CATALYTIC SUBUNITALPHA ISOFORM.                                                                                                                                                                                                                                                                                                                                                                                                                                                                                                                                                                                                                                                                                                                                                                                                                                                                                                                                                                                                                                                                                                                                            | Q7Z673; Q9BY37; Q9UEB7; Q9UED7                                                                                 | ; CUL4B_HUMAN; Q5JRZ4_HUMAN                                                                                                                               |
| 838                        | IPI00179415; IPI00747748                                                                                            | PPP3CA        | 511                                  | 521  | 516  | 5.8E+04                               | 5.9E+04 | 5.8E+04 | 7.5             | 3                     | 1         | 1         | 0        | 0         | ISOFORM 1 OF CULLIN-4B.; ISOFORM 2 OF CULLIN-4B.; 103 KDA PROTEIN.; 28 KDA PROTEIN. ISOFORM 1 OF SERINE/THREONINE-PROTEIN PHOSPHATASE 2B CATALYTIC SUBUNITALPHA ISOFORM.; ISOFORM 2 OF SERINE/THREONINE-PROTEIN PHOSPHATASE 2B CATALYTIC SUBUNITALPHA ISOFORM.                                                                                                                                                                                                                                                                                                                                                                                                                                                                                                                                                                                                                                                                                                                                                                                                                                                                                                                                                                                                                                                                                                                                            | A1A441; Q08209; Q8TAW9; Q9UMM5                                                                                 | A1A441_HUMAN; PP2BA_HUMAN; Q9UMM5_HUMAN                                                                                                                   |
| 839                        | IPI00180675                                                                                                         | TUBA1A        | 451                                  | 451  | 451  | 5.0E+04                               | 5.0E+04 | 5.0E+04 | 41.9            | 13                    | 1         | 1         | 0        | 0         | TUBULIN ALPHA-3 CHAIN.                                                                                                                                                                                                                                                                                                                                                                                                                                                                                                                                                                                                                                                                                                                                                                                                                                                                                                                                                                                                                                                                                                                                                                                                                                                                                                                                                                                    | Q71U36; Q9UQM3                                                                                                 | Q9UQM3_HUMAN; TBA3_HUMAN                                                                                                                                  |
| 840                        | IPI00181231; IPI00783302                                                                                            | PTCD3         | 689                                  | 690  | 690  | 7.9E+04                               | 7.9E+04 | 7.9E+04 | 6.0             | 3                     | 1         | 1         | 0        | 0         | 79 KDA PROTEIN.; PENTATRICOPEPTIDE REPEAT DOMAIN 3.                                                                                                                                                                                                                                                                                                                                                                                                                                                                                                                                                                                                                                                                                                                                                                                                                                                                                                                                                                                                                                                                                                                                                                                                                                                                                                                                                       | Q597H0; Q658Y9; Q96EY7; Q9BUZ8; Q9NWL0                                                                         | ; Q597H0_HUMAN; Q658Y9_HUMAN; Q96EY7_HUMAN; Q9BUZ8_HUMAN; Q9NWL0_HUMAN                                                                                    |
| 841                        | IPI00185374; IPI00335069; IPI00787055                                                                               | PSMD12        | 397                                  | 456  | 430  | 4.6E+04                               | 5.3E+04 | 5.0E+04 | 14.9            | 6                     | 1         | 1         | 0        | 0         | 26S PROTEASOME NON-ATPASE REGULATORY SUBUNIT 12.; SIMILAR TO PROTEASOME 26S NON-ATPASE SUBUNIT 12 ISOFORM 2.; SIMILAR TO 26S PROTEASOME NON-ATPASE REGULATORY SUBUNIT 12.                                                                                                                                                                                                                                                                                                                                                                                                                                                                                                                                                                                                                                                                                                                                                                                                                                                                                                                                                                                                                                                                                                                                                                                                                                 | Q00232; Q53HA2; Q6P053                                                                                         | ; PSD12_HUMAN                                                                                                                                             |
| 842                        | IPI00216003                                                                                                         | CUL5          | 837                                  | 837  | 837  | 9.7E+04                               | 9.7E+04 | 9.7E+04 | 11.3            | 8                     | 1         | 1         | 0        | 0         | CULLIN HOMOLOG 5.                                                                                                                                                                                                                                                                                                                                                                                                                                                                                                                                                                                                                                                                                                                                                                                                                                                                                                                                                                                                                                                                                                                                                                                                                                                                                                                                                                                         |                                                                                                                |                                                                                                                                                           |
| 843                        | IPI00216470                                                                                                         | PIP5K2B       | 416                                  | 416  | 416  | 4.7E+04                               | 4.7E+04 | 4.7E+04 | 5.5             | 2                     | 0         | 1         | 0        | 0         | ISOFORM 1 OF PHOSPHATIDYLINOSITOL-4-PHOSPHATE 5-KINASE TYPE-2 BETA.                                                                                                                                                                                                                                                                                                                                                                                                                                                                                                                                                                                                                                                                                                                                                                                                                                                                                                                                                                                                                                                                                                                                                                                                                                                                                                                                       | P78356; Q5U0E8; Q8TBP2                                                                                         | PI52B_HUMAN                                                                                                                                               |
| 844                        | IPI00216694                                                                                                         | PLS3          | 630                                  | 630  | 630  | 7.1E+04                               | 7.1E+04 | 7.1E+04 | 3.5             | 2                     | 0         | 1         | 0        | 0         | PLASTIN 3.                                                                                                                                                                                                                                                                                                                                                                                                                                                                                                                                                                                                                                                                                                                                                                                                                                                                                                                                                                                                                                                                                                                                                                                                                                                                                                                                                                                                | Q53GY0; Q5JRN9; Q96H11                                                                                         | Q53GY0_HUMAN; Q5JRN9_HUMAN; Q96H11_HUMAN                                                                                                                  |
| 845                        | IPI00216951                                                                                                         | DARS          | 501                                  | 501  | 501  | 5.7E+04                               | 5.7E+04 | 5.7E+04 | 8.2             | 3                     | 0         | 1         | 0        | 0         | ASPARTYL-TRNA SYNTHETASE, CYTOPLASMIC. ISOFORM 2 OF PROBABLE D-LACTATE DEHYDROGENASE, MITOCHONDRIALPRECURSOR.; ISOFORM 1 OF PROBABLE D-LACTATE DEHYDROGENASE, MITOCHONDRIALPRECURSOR.                                                                                                                                                                                                                                                                                                                                                                                                                                                                                                                                                                                                                                                                                                                                                                                                                                                                                                                                                                                                                                                                                                                                                                                                                     | Q53YC5; Q68CR9; Q9BW52                                                                                         | Q53YC5_HUMAN; Q53T60_HUMAN; Q68CR9_HUMAN; SYDC_HUMAN                                                                                                      |
| 846                        | IPI00218015; IPI00329133                                                                                            | LDHD          | 484                                  | 507  | 496  | 5.2E+04                               | 5.5E+04 | 5.4E+04 | 5.6             | 2                     | 1         | 1         | 0        | 0         | DEHYDROGENASE, MITOCHONDRIALPRECURSOR.                                                                                                                                                                                                                                                                                                                                                                                                                                                                                                                                                                                                                                                                                                                                                                                                                                                                                                                                                                                                                                                                                                                                                                                                                                                                                                                                                                    | Q86WU2; Q8IZK5                                                                                                 | LDHD_HUMAN                                                                                                                                                |

| Protein Group* | IPI ID                                                          | IPI gene name | Amino Acids in Sequence <sup>1</sup> |         |         | Protein Molecular Weight <sup>1</sup> |                 |                 | Seq. Cov. (max) | Unique Peptides (max) | Detection |           |          |           | Protein name                                                                                                                                                                                                  | Uniprot Id                                                                                                                                                 | Uniprot Entry Name                                                                                         |
|----------------|-----------------------------------------------------------------|---------------|--------------------------------------|---------|---------|---------------------------------------|-----------------|-----------------|-----------------|-----------------------|-----------|-----------|----------|-----------|---------------------------------------------------------------------------------------------------------------------------------------------------------------------------------------------------------------|------------------------------------------------------------------------------------------------------------------------------------------------------------|------------------------------------------------------------------------------------------------------------|
|                |                                                                 |               | Min.                                 | Max.    | Mean    | Min.                                  | Max.            | Mean            |                 |                       | Expt. I-1 | Expt. I-2 | Expt. II | Expt. III |                                                                                                                                                                                                               |                                                                                                                                                            |                                                                                                            |
| 847            | IPI00218971; IPI00788806; IPI00790255; IPI00794806              | PPM2C         | 537                                  | 588     | 565     | 6.1E+04                               | 6.7E+04         | 6.4E+04         | 10.6            | 4                     | 0         | 1         | 0        | 0         | [PYRUVATE DEHYDROGENASE [LIPOAMIDE]]-PHOSPHATASE 1, MITOCHONDRIALPRECURSOR.; PYRUVATE DEHYDROGENASE PHOSPHATASE PRECURSOR.; 65 KDA PROTEIN.; 67 KDA PROTEIN.                                                  | Q5U5K1; Q6P1N1; Q9P0J1 Q13867; Q53F86; Q9UER9 Q95204; Q2M2G6; Q4VBR1; Q5JRW7; Q5JRX3; Q7L5Z7; Q9BS16; Q9BVJ5; Q9UPP8                                       | ; PDP1_HUMAN; Q6P1N1_HUMAN                                                                                 |
| 848            | IPI00219575; IPI00794082                                        | BLMH          | 279                                  | 455     | 367     | 3.2E+04                               | 5.3E+04         | 4.2E+04         | 10.0            | 2                     | 1         | 1         | 0        | 0         | BLEOMYCIN HYDROLASE.; 32 KDA PROTEIN.                                                                                                                                                                         |                                                                                                                                                            | ; BLMH_HUMAN                                                                                               |
| 849            | IPI00219613; IPI00787827                                        | PITRM1        | 1037                                 | 1038    | 1038    | 1.2E+05                               | 1.2E+05         | 1.2E+05         | 3.2             | 2                     | 0         | 1         | 0        | 0         | ISOFORM 1 OF PRESEQUENCE PROTEASE, MITOCHONDRIAL PRECURSOR.; ISOFORM 2 OF PRESEQUENCE PROTEASE, MITOCHONDRIAL PRECURSOR.                                                                                      |                                                                                                                                                            | PREP_HUMAN                                                                                                 |
| 850            | IPI00220150                                                     | IDH3G         | 393                                  | 393     | 393     | 4.3E+04                               | 4.3E+04         | 4.3E+04         | 21.4            | 4                     | 1         | 1         | 0        | 0         | ISOCITRATE DEHYDROGENASE [NAD] SUBUNIT GAMMA, MITOCHONDRIAL PRECURSOR.                                                                                                                                        | P51553; Q9BUU5 Q6NS24; Q75LP5 P49591; OOVGA5; Q53HA4; Q5T5C7; Q5T5C8; Q9NSE3 Q5BKX8                                                                        | IDH3G_HUMAN Q6NS24_HUMAN; Q75LP5_HUMAN QOVGA5_HUMAN; Q53HA4_HUMAN; Q5T5C7_HUMAN; Q5T5C8_HUMAN Q5BKX8_HUMAN |
| 851            | IPI002220396                                                    | PHKG1         | 390                                  | 390     | 390     | 4.5E+04                               | 4.5E+04         | 4.5E+04         | 15.6            | 4                     | 1         | 1         | 0        | 0         | PFKFB2 PROTEIN.                                                                                                                                                                                               |                                                                                                                                                            |                                                                                                            |
| 852            | IPI00220637; IPI00514587                                        | SARS          | 514                                  | 536     | 525     | 5.9E+04                               | 6.1E+04         | 6.0E+04         | 8.0             | 3                     | 0         | 1         | 0        | 0         | SERYL-TRNA SYNTHETASE, CYTOPLASMIC.; SERYL-TRNA SYNTHETASE.                                                                                                                                                   |                                                                                                                                                            | SYSC_HUMAN                                                                                                 |
| 853            | IPI00249656                                                     | LOC347273     | 364                                  | 364     | 364     | 4.2E+04                               | 4.2E+04         | 4.2E+04         | 5.8             | 2                     | 1         | 1         | 0        | 0         | HYPOTHEtical PROTEIN LOC347273.                                                                                                                                                                               |                                                                                                                                                            | Q5BKX8_HUMAN                                                                                               |
| 854            | IPI00257508                                                     | DPYSL2        | 572                                  | 572     | 572     | 6.2E+04                               | 6.2E+04         | 6.2E+04         | 20.6            | 6                     | 1         | 1         | 0        | 0         | DIHYDROPYRIMIDINASE-RELATED PROTEIN 2. NADH-UBIQUINONE OXIDOREDUCTASE FLAVOPROTEIN 3 ISOFORM A PRECURSOR.                                                                                                     | O00424; Q16555; Q53ET2; Q59GB4; Q8NAN9                                                                                                                     | DPYL2_HUMAN; Q53ET2_HUMAN; Q59GB4_HUMAN; Q8NAN9_HUMAN                                                      |
| 855            | IPI00291016                                                     | NDUFV3        | 473                                  | 473     | 473     | 5.1E+04                               | 5.1E+04         | 5.1E+04         | 7.0             | 2                     | 0         | 1         | 0        | 0         | Q8WU60; Q96DP0 P10909; P11380; P11381; O2TU75; Q5HYC1; Q7Z5B9 P12268; O6LEF3 Q8N9B3; Q8WVV3; Q8WZ66; Q9BRA4 Q6FHZ7; Q99541; Q9BSC3                                                                            | Q8WU60_HUMAN; Q96DP0_HUMAN                                                                                                                                 |                                                                                                            |
| 856            | IPI00291262; IPI00400826; IPI00795633                           | CLU IMPDH2    | 448 514                              | 501 514 | 466 514 | 5.2E+04 5.6E+04                       | 5.8E+04 5.6E+04 | 5.4E+04 5.6E+04 | 10.2 17.1       | 3 6                   | 0 1       | 0 1       | 0 0      | 0 0       | CLUSTERIN PRECURSOR.; CLUSTERIN ISOFORM 1.; 52 KDA PROTEIN.                                                                                                                                                   |                                                                                                                                                            | ; CLUS_HUMAN; Q2TU75_HUMAN                                                                                 |
| 857            | IPI00291510                                                     | IMPDH2        | 514                                  | 514     | 514     | 5.6E+04                               | 5.6E+04         | 5.6E+04         | 17.1            | 6                     | 1         | 1         | 0        | 0         | INOSINE-5'-MONOPHOSPHATE DEHYDROGENASE 2. ISOFORM 1 OF RETICULON-4-INTERACTING PROTEIN 1, MITOCHONDRIALPRECURSOR.                                                                                             |                                                                                                                                                            | IMDH2_HUMAN                                                                                                |
| 858            | IPI00291972                                                     | RTN4IP1       | 396                                  | 396     | 396     | 4.4E+04                               | 4.4E+04         | 4.4E+04         | 5.6             | 2                     | 0         | 1         | 0        | 0         | Q8WZ66; Q9BRA4 Q6FHZ7; Q99541; Q9BSC3                                                                                                                                                                         |                                                                                                                                                            | RT411_HUMAN                                                                                                |
| 859            | IPI00293307                                                     | ADFP          | 437                                  | 437     | 437     | 4.8E+04                               | 4.8E+04         | 4.8E+04         | 11.2            | 3                     | 1         | 1         | 0        | 0         | ADIPOPHILIN.                                                                                                                                                                                                  |                                                                                                                                                            | ADFP_HUMAN; Q6FHZ7_HUMAN                                                                                   |
| 860            | IPI00293616                                                     | DDX3Y         | 660                                  | 660     | 660     | 7.3E+04                               | 7.3E+04         | 7.3E+04         | 5.2             | 2                     | 0         | 1         | 0        | 0         | ATP-DEPENDENT RNA HELICASE DDX3Y.                                                                                                                                                                             | Q15523; Q81YV7 Q82499                                                                                                                                      | DDX3Y_HUMAN                                                                                                |
| 861            | IPI00293655                                                     | DDX1          | 740                                  | 740     | 740     | 8.2E+04                               | 8.2E+04         | 8.2E+04         | 11.2            | 5                     | 1         | 1         | 0        | 0         | ATP-DEPENDENT RNA HELICASE DDX1.                                                                                                                                                                              | Q95019; P53004; Q86UX0; Q96QL4; Q9BRW8                                                                                                                     | DDX1_HUMAN                                                                                                 |
| 862            | IPI00294158                                                     | BLVRA         | 296                                  | 296     | 296     | 3.3E+04                               | 3.3E+04         | 3.3E+04         | 17.6            | 4                     | 1         | 1         | 0        | 0         | BILIVERDIN REDUCTASE A PRECURSOR. ISOFORM 2 OF ATPASE FAMILY AAA DOMAIN-CONTAINING PROTEIN 3A.; ISOFORM 1 OF ATPASE FAMILY AAA DOMAIN-CONTAINING PROTEIN 3A.; ATPASE FAMILY, AAA DOMAIN CONTAINING 3A.        | Q5SV23; Q5SV24; Q8N275; Q96A50; Q9NV17                                                                                                                     | BIEA_HUMAN                                                                                                 |
| 863            | IPI00295992; IPI00643435; IPI00646144                           | ATAD3A        | 572                                  | 634     | 597     | 6.4E+04                               | 7.1E+04         | 6.7E+04         | 5.3             | 3                     | 0         | 1         | 0        | 0         | EUKARYOTIC TRANSLATION INITIATION FACTOR 2 SUBUNIT 3.                                                                                                                                                         | Q53HK3                                                                                                                                                     | ATD3A_HUMAN; Q5SV24_HUMAN                                                                                  |
| 864            | IPI00297982                                                     | EIF2S3        | 472                                  | 472     | 472     | 5.1E+04                               | 5.1E+04         | 5.1E+04         | 8.7             | 2                     | 1         | 1         | 0        | 0         | 88 KDA PROTEIN.; ISOFORM DEL-701 OF SIGNAL TRANSDUCER AND ACTIVATOR OF TRANSCRIPTION 3.; SIGNAL TRANSDUCER AND ACTIVATOR OF TRANSCRIPTION 3. ISOFORM 1 OF SIGNAL TRANSDUCER AND ACTIVATOR OF TRANSCRIPTION 3. | Q14916; P40763; Q9BW54; Q9BXH2                                                                                                                             | IF2G_HUMAN; Q2VIR3_HUMAN; Q53HK3_HUMAN                                                                     |
| 865            | IPI00298887; IPI00306436; IPI00412752; IPI00784414              | STAT3         | 722                                  | 773     | 759     | 8.3E+04                               | 8.8E+04         | 8.7E+04         | 5.1             | 2                     | 1         | 1         | 0        | 0         | VOLTAGE-DEPENDENT L-TYPE CALCIUM CHANNEL SUBUNIT ALPHA-1S.; CALCIUM CHANNEL, VOLTAGE-DEPENDENT, L TYPE, ALPHA 1S SUBUNIT.; CALCIUM CHANNEL, VOLTAGE-DEPENDENT, L TYPE, ALPHA 1S SUBUNIT.                      | Q12966; Q13062; Q5T4J6; Q5T4J7                                                                                                                             | ; Q12966_HUMAN; Q13062_HUMAN; Q5T4J6_HUMAN; Q5T4J7_HUMAN                                                   |
| 866            | IPI00299240; IPI00514837; IPI00642897                           | CACNA1S       | 1856                                 | 1875    | 1868    | 2.1E+05                               | 2.1E+05         | 2.1E+05         | 1.7             | 2                     | 0         | 1         | 0        | 0         | ISOFORM 2 OF PROTEIN DISULFIDE-ISOMERASE A6 PRECURSOR.; ISOFORM 1 OF PROTEIN DISULFIDE-ISOMERASE A6 PRECURSOR.                                                                                                | Q15084; Q53RC7; Q6ZSH5; Q99778 Q96AN5 Q5JRB3; Q8WVLL3; Q9NZQ9; Q9UKH2 P36959; Q96H06 Q5VTK4; Q8NBX0; Q8TAR0; Q9Y363 P26639; Q53GX7; Q5M7Z9; Q96FP5; Q9BWA6 |                                                                                                            |
| 867            | IPI00299571; IPI00644989                                        | PDIA6         | 440                                  | 492     | 466     | 4.8E+04                               | 5.4E+04         | 5.1E+04         | 16.1            | 5                     | 1         | 1         | 0        | 0         | TRANSMEMBRANE PROTEIN 143.                                                                                                                                                                                    |                                                                                                                                                            | PDIA6_HUMAN; Q53RC7_HUMAN                                                                                  |
| 868            | IPI00303120                                                     | TMEM143       | 459                                  | 459     | 459     | 5.2E+04                               | 5.2E+04         | 5.2E+04         | 17.2            | 6                     | 1         | 1         | 0        | 0         | TROPOMODULIN-4.                                                                                                                                                                                               |                                                                                                                                                            | Q96AN5_HUMAN                                                                                               |
| 869            | IPI00303200                                                     | TMOD4         | 345                                  | 345     | 345     | 3.9E+04                               | 3.9E+04         | 3.9E+04         | 24.1            | 6                     | 1         | 1         | 0        | 0         | GMP REDUCTASE 1.                                                                                                                                                                                              |                                                                                                                                                            | Q5JRB3_HUMAN; TMOD4_HUMAN                                                                                  |
| 870            | IPI00304803                                                     | GMPR          | 345                                  | 345     | 345     | 3.7E+04                               | 3.7E+04         | 3.7E+04         | 9.9             | 3                     | 1         | 1         | 0        | 0         | PROBABLE SACCHAROPINE DEHYDROGENASE.; SACCHAROPINE DEHYDROGENASE.                                                                                                                                             | Q5VTK4; Q8NBX0; Q8TAR0; Q9Y363 P26639; Q53GX7; Q5M7Z9; Q96FP5; Q9BWA6                                                                                      | GMPR1_HUMAN                                                                                                |
| 871            | IPI00329600; IPI00641681                                        | SCCPDH        | 241                                  | 429     | 335     | 2.6E+04                               | 4.7E+04         | 3.7E+04         | 11.6            | 3                     | 1         | 1         | 0        | 0         | THREONYL-TRNA SYNTHETASE, CYTOPLASMIC.                                                                                                                                                                        |                                                                                                                                                            | Q5VTK4_HUMAN; SCPDH_HUMAN                                                                                  |
| 872            | IPI00329633                                                     | TARS          | 723                                  | 723     | 723     | 8.3E+04                               | 8.3E+04         | 8.3E+04         | 3.2             | 2                     | 0         | 1         | 0        | 0         | ISOFORM 5 OF PROTEIN CORDON-BLEU.; ISOFORM 1 OF PROTEIN CORDON-BLEU.; ISOFORM 2 OF PROTEIN CORDON-BLEU.; ISOFORM 3 OF PROTEIN CORDON-BLEU.; ISOFORM 4 OF PROTEIN CORDON-BLEU.                                 |                                                                                                                                                            | Q53GX7_HUMAN; Q5M7Z9_HUMAN; SYTC_HUMAN                                                                     |
| 873            | IPI00329653; IPI00384529; IPI00807589; IPI00807621; IPI00807645 | COBL          | 379                                  | 1343    | 933     | 4.2E+04                               | 1.4E+05         | 1.0E+05         | 3.5             | 3                     | 1         | 1         | 0        | 0         | ISOFORM 1 OF FATTY ALDEHYDE DEHYDROGENASE.; ISOFORM 2 OF FATTY ALDEHYDE DEHYDROGENASE. ISOFORM 1 OF KELCH REPEAT AND BTB DOMAIN-CONTAINING PROTEIN 5.                                                         | O75128; Q2T9J3; Q504Y4; Q86XA7; Q8N304; Q8TCM1 P51648; Q59H65; Q68D64; Q6I9T3; Q93011; Q96J37 Q2TBA0; Q86S11; Q96MR2                                       | COBL_HUMAN; Q8TCM1_HUMAN                                                                                   |
| 874            | IPI00333619; IPI00394758                                        | ALDH3A2       | 485                                  | 508     | 497     | 5.5E+04                               | 5.8E+04         | 5.6E+04         | 11.6            | 4                     | 1         | 1         | 0        | 0         |                                                                                                                                                                                                               |                                                                                                                                                            | AL3A2_HUMAN; Q59H65_HUMAN; Q68D64_HUMAN; Q6I9T3_HUMAN                                                      |
| 875            | IPI00383947                                                     | KBTBD5        | 621                                  | 621     | 621     | 6.9E+04                               | 6.9E+04         | 6.9E+04         | 5.8             | 3                     | 1         | 1         | 0        | 0         |                                                                                                                                                                                                               |                                                                                                                                                            | KBTB5_HUMAN                                                                                                |

| Protein Group* | IPI ID                                                          | IPI gene name                         | Amino Acids in Sequence <sup>1</sup> |      |      | Protein Molecular Weight <sup>1</sup> |         |         | Seq. Cov. (max) | Unique Peptides (max) | Detection |           |          |           | Protein name                                                                                                                                                                                                                                                                                                                                                                                                                                                                                                                                                                                                                                                                         | Uniprot Id                                                                                                                                                                                                                      | Uniprot Entry Name                                                                                                                                                                                                                                                                                                                                          |
|----------------|-----------------------------------------------------------------|---------------------------------------|--------------------------------------|------|------|---------------------------------------|---------|---------|-----------------|-----------------------|-----------|-----------|----------|-----------|--------------------------------------------------------------------------------------------------------------------------------------------------------------------------------------------------------------------------------------------------------------------------------------------------------------------------------------------------------------------------------------------------------------------------------------------------------------------------------------------------------------------------------------------------------------------------------------------------------------------------------------------------------------------------------------|---------------------------------------------------------------------------------------------------------------------------------------------------------------------------------------------------------------------------------|-------------------------------------------------------------------------------------------------------------------------------------------------------------------------------------------------------------------------------------------------------------------------------------------------------------------------------------------------------------|
|                |                                                                 |                                       | Min.                                 | Max. | Mean | Min.                                  | Max.    | Mean    |                 |                       | Expt. I-1 | Expt. I-2 | Expt. II | Expt. III |                                                                                                                                                                                                                                                                                                                                                                                                                                                                                                                                                                                                                                                                                      |                                                                                                                                                                                                                                 |                                                                                                                                                                                                                                                                                                                                                             |
| 876            | IPI00396485; IPI00472724                                        | EEF1A1                                | 462                                  | 462  | 462  | 5.0E+04                               | 5.0E+04 | 5.0E+04 | 23.6            | 9                     | 1         | 1         | 0        | 0         | ELONGATION FACTOR 1-ALPHA 1.; EUKARYOTIC TRANSLATION ELONGATION FACTOR 1 ALPHA-LIKE 3. SIMILAR TO 40S RIBOSOMAL PROTEIN SA (P40) [34/67 KDA LAMININ RECEPTOR(COLON CARCINOMA LAMININ-BINDING PROTEIN) (NEM1/CHD4) (MULTIDRUGRESISTANCE-ASSOCIATED PROTEIN MGR1-AG) ISOFORM 1.; LAMININ RECEPTOR-LIKE PROTEIN LAMRL5.; RIBOSOMAL PROTEIN SA.; 40S RIBOSOMAL PROTEIN SA.; 16 KDA PROTEIN. HYPOTHETICAL PROTEIN DKFZP686I04222. ISOFORM 2 OF IMPORT INNER MEMBRANE TRANSLOCASE SUBUNIT TIM50.MITOCHONDRIAL PRECURSOR.; ISOFORM 1 OF IMPORT INNER MEMBRANE TRANSLOCASE SUBUNIT TIM50.MITOCHONDRIAL PRECURSOR. ISOFORM 1 OF CYTOSOL AMINOPEPTIDASE.; ISOFORM 2 OF CYTOSOL AMINOPEPTIDASE. | P04719; P04720; P68104; Q16577; Q53G35; Q53G89; Q53GA1; Q53GE9; Q53HM9; Q53HQ7; Q53HR1; Q53HR5; Q5VTE0; Q6IPN6; Q6IPS9; Q6IPT9; Q6IQ15; Q6P082; Q6P4C9; Q8IUB0; Q8TBL1; Q96C29; Q96CD8; Q96EB3; Q96RE1; Q9H217; Q9NZ86          | EF1A1_HUMAN; Q16577_HUMAN; Q53G85_HUMAN; Q53G89_HUMAN; Q53GA1_HUMAN; Q53GE9_HUMAN; Q53HM9_HUMAN; Q53HQ7_HUMAN; Q53HR1_HUMAN; Q53HR5_HUMAN; Q5VTE0_HUMAN; Q6IPN6_HUMAN; Q6IPS9_HUMAN; Q6IPT9_HUMAN; Q6IQ15_HUMAN; Q6P082_HUMAN; Q6P4C9_HUMAN; Q8IUB0_HUMAN; Q8TBL1_HUMAN; Q96C29_HUMAN; Q96CD8_HUMAN; Q96EB3_HUMAN; Q96RE1_HUMAN; Q9H217_HUMAN; Q9NZ86_HUMAN |
| 877            | IPI00399036; IPI00411639; IPI00413108; IPI00553164; IPI00790580 | LOC388524; RPSA; RPSAP15; hCG_1984468 | 147                                  | 300  | 266  | 1.6E+04                               | 3.3E+04 | 3.0E+04 | 19.0            | 5                     | 1         | 1         | 0        | 0         | PROTEIN SA.; 16 KDA PROTEIN. HYPOTHETICAL PROTEIN DKFZP686I04222. ISOFORM 2 OF IMPORT INNER MEMBRANE TRANSLOCASE SUBUNIT TIM50.MITOCHONDRIAL PRECURSOR.; ISOFORM 1 OF IMPORT INNER MEMBRANE TRANSLOCASE SUBUNIT TIM50.MITOCHONDRIAL PRECURSOR. ISOFORM 1 OF CYTOSOL AMINOPEPTIDASE.; ISOFORM 2 OF CYTOSOL AMINOPEPTIDASE.                                                                                                                                                                                                                                                                                                                                                            | P08865; P11085; P12030; Q16471; Q6IPD1; Q6IPD2; Q6NSD1; Q6NXQ8; Q86VC0; Q96RS2; Q59F97; Q7Z2Y7                                                                                                                                  | ; Q6NSD1_HUMAN; Q6NXQ8_HUMAN; Q86VC0_HUMAN; Q96RS2_HUMAN; R5SA_HUMAN Q59F97_HUMAN; Q7Z2Y7_HUMAN                                                                                                                                                                                                                                                             |
| 878            | IPI00413451                                                     | SERPINB6                              | 409                                  | 409  | 409  | 4.6E+04                               | 4.6E+04 | 4.6E+04 | 21.5            | 6                     | 1         | 1         | 0        | 0         | PROTEIN SA.; 16 KDA PROTEIN. HYPOTHETICAL PROTEIN DKFZP686I04222. ISOFORM 2 OF IMPORT INNER MEMBRANE TRANSLOCASE SUBUNIT TIM50.MITOCHONDRIAL PRECURSOR.; ISOFORM 1 OF IMPORT INNER MEMBRANE TRANSLOCASE SUBUNIT TIM50.MITOCHONDRIAL PRECURSOR. ISOFORM 1 OF CYTOSOL AMINOPEPTIDASE.; ISOFORM 2 OF CYTOSOL AMINOPEPTIDASE.                                                                                                                                                                                                                                                                                                                                                            | Q0VAB1; Q330K1; Q3ZC08; Q6QA00; Q96FJ5; Q96GY2; Q9H370                                                                                                                                                                          | Q0VAB1_HUMAN; Q330K1_HUMAN; TIM50_HUMAN                                                                                                                                                                                                                                                                                                                     |
| 879            | IPI00418497; IPI00656071                                        | TIMM50                                | 353                                  | 456  | 405  | 4.0E+04                               | 5.0E+04 | 4.5E+04 | 8.1             | 3                     | 1         | 1         | 0        | 0         | MEMBRANE TRANSLOCASE SUBUNIT TIM50.MITOCHONDRIAL PRECURSOR. ISOFORM 1 OF CYTOSOL AMINOPEPTIDASE.; ISOFORM 2 OF CYTOSOL AMINOPEPTIDASE.                                                                                                                                                                                                                                                                                                                                                                                                                                                                                                                                               | P28838; Q6IAM6; Q6P0L6; Q9UQE3; Q75521; Q53GC8; Q53HG3; Q59E94; Q5JYK5; Q5JYK7; Q6IBN4; Q7L124; Q8N0X0; Q9BLUE9; Q9HOT9; Q9NOH1; Q9NYD2; Q9NYH7; Q9UN55; Q95278; Q95483; Q5THQ4; Q6IS15; Q8IU96; Q8IX24; Q8IX25; Q9BS66; Q9JEN2 | Q0VAB1_HUMAN; Q330K1_HUMAN; TIM50_HUMAN                                                                                                                                                                                                                                                                                                                     |
| 880            | IPI00419237; IPI00789806                                        | LAP3                                  | 488                                  | 519  | 504  | 5.3E+04                               | 5.6E+04 | 5.4E+04 | 20.4            | 8                     | 1         | 1         | 0        | 0         | ISOFORM 1 OF LAFORIN.; ISOFORM 3 OF LAFORIN. CGMP-DEPENDENT PROTEIN KINASE 1, ALPHA ISOZYME.; CGMP-DEPENDENT PROTEIN KINASE 1, BETA ISOZYME.                                                                                                                                                                                                                                                                                                                                                                                                                                                                                                                                         | P28838; Q6IAM6; Q6P0L6; Q9UQE3; Q75521; Q53GC8; Q53HG3; Q59E94; Q5JYK5; Q5JYK7; Q6IBN4; Q7L124; Q8N0X0; Q9BLUE9; Q9HOT9; Q9NOH1; Q9NYD2; Q9NYH7; Q9UN55; Q95278; Q95483; Q5THQ4; Q6IS15; Q8IU96; Q8IX24; Q8IX25; Q9BS66; Q9JEN2 | AMPL_HUMAN                                                                                                                                                                                                                                                                                                                                                  |
| 881            | IPI00419263; IPI00639841; IPI00827665                           | PECI                                  | 195                                  | 394  | 316  | 2.2E+04                               | 4.4E+04 | 3.5E+04 | 18.1            | 4                     | 1         | 1         | 0        | 0         | PEROXISOMAL 3,2-TRANS-ENOYL-COA ISOMERASE.; PEROXISOMAL 3,2-TRANS-ENOYL-COA ISOMERASE.; 22 KDA PROTEIN.                                                                                                                                                                                                                                                                                                                                                                                                                                                                                                                                                                              | P14619; Q13976; Q5JSJ6; Q5SQU3; Q6P5T7                                                                                                                                                                                          | ; PEC1_HUMAN; Q53GC8_HUMAN; Q53HG3_HUMAN; Q59E94_HUMAN; Q5JYK7_HUMAN; Q6IBN4_HUMAN; Q7L124_HUMAN; Q9NYD2_HUMAN                                                                                                                                                                                                                                              |
| 882            | IPI00423426; IPI00423430                                        | EPM2A                                 | 331                                  | 331  | 331  | 3.7E+04                               | 3.7E+04 | 3.7E+04 | 9.7             | 2                     | 1         | 1         | 0        | 0         | ISOFORM 1 OF LAFORIN.; ISOFORM 3 OF LAFORIN. CGMP-DEPENDENT PROTEIN KINASE 1, ALPHA ISOZYME.; CGMP-DEPENDENT PROTEIN KINASE 1, BETA ISOZYME.                                                                                                                                                                                                                                                                                                                                                                                                                                                                                                                                         | P14619; Q13976; Q5JSJ6; Q5SQU3; Q6P5T7                                                                                                                                                                                          | EPM2A_HUMAN; Q5THQ4_HUMAN; Q6IS15_HUMAN                                                                                                                                                                                                                                                                                                                     |
| 883            | IPI00427586; IPI00436355                                        | PRKG1                                 | 671                                  | 686  | 679  | 7.6E+04                               | 7.8E+04 | 7.7E+04 | 7.0             | 3                     | 1         | 1         | 0        | 0         | ISOZYME.; CGMP-DEPENDENT PROTEIN KINASE 1, BETA ISOZYME.                                                                                                                                                                                                                                                                                                                                                                                                                                                                                                                                                                                                                             | Q5JSJ6; Q5SQU3; Q6P5T7                                                                                                                                                                                                          | KGP1A_HUMAN; KGP1B_HUMAN; Q5SQU3_HUMAN; Q6P5T7_HUMAN                                                                                                                                                                                                                                                                                                        |
| 884            | IPI00444179; IPI00787636                                        | LSDP5                                 | 463                                  | 524  | 494  | 5.1E+04                               | 5.7E+04 | 5.4E+04 | 6.3             | 2                     | 0         | 1         | 0        | 0         | LIPID STORAGE DROPLET PROTEIN 5.; LIPID STORAGE DROPLET PROTEIN 5.                                                                                                                                                                                                                                                                                                                                                                                                                                                                                                                                                                                                                   | A2RRC1; Q00G26; P09874; Q05D33; Q5VX86; Q6PJL0; Q8IU29; Q96P95                                                                                                                                                                  | ; A2RRC1_HUMAN; Q00G26_HUMAN P09874_HUMAN; Q05D33_HUMAN; Q5VX86_HUMAN; Q6PJL0_HUMAN; Q96P95_HUMAN                                                                                                                                                                                                                                                           |
| 885            | IPI00449049                                                     | PARP1                                 | 1014                                 | 1014 | 1014 | 1.1E+05                               | 1.1E+05 | 1.1E+05 | 2.8             | 2                     | 1         | 1         | 0        | 0         | POLY [ADP-RIBOSE] POLYMERASE 1.                                                                                                                                                                                                                                                                                                                                                                                                                                                                                                                                                                                                                                                      | Q53HQ1; Q53HT4; Q5QTR1; Q5T115; Q6ICD2; Q7Z5X3; Q8N7H0; Q9Y282; P12956; Q6FG89; Q6IC76; Q9UCQ2; Q9UCQ3                                                                                                                          | IF3I_HUMAN; Q53HQ1_HUMAN; Q53HT4_HUMAN; Q5QTR1_HUMAN; Q5T115_HUMAN; Q6ICD2_HUMAN; Q7Z5X3_HUMAN; Q8N7H0_HUMAN                                                                                                                                                                                                                                                |
| 886            | IPI00465233; IPI00745266                                        | EIF3S6IP                              | 564                                  | 607  | 586  | 6.7E+04                               | 7.1E+04 | 6.9E+04 | 5.1             | 2                     | 0         | 1         | 0        | 0         | DJ1014D13.1 PROTEIN.; EUKARYOTIC TRANSLATION INITIATION FACTOR 3 SUBUNIT 6-INTERACTINGPROTEIN.                                                                                                                                                                                                                                                                                                                                                                                                                                                                                                                                                                                       | Q53HQ1; Q53HT4; Q5QTR1; Q5T115; Q6ICD2; Q7Z5X3; Q8N7H0; Q9Y282; P12956; Q6FG89; Q6IC76; Q9UCQ2; Q9UCQ3                                                                                                                          | ; KU70_HUMAN; Q6FG89_HUMAN; Q6IC76_HUMAN                                                                                                                                                                                                                                                                                                                    |
| 887            | IPI00465430; IPI00644712                                        | XRCC6                                 | 609                                  | 609  | 609  | 7.0E+04                               | 7.0E+04 | 7.0E+04 | 11.2            | 5                     | 1         | 1         | 0        | 0         | 70 KDA PROTEIN.; ATP-DEPENDENT DNA HELICASE 2 SUBUNIT 1.                                                                                                                                                                                                                                                                                                                                                                                                                                                                                                                                                                                                                             | Q6IC76; Q9UCQ2; Q9UCQ3                                                                                                                                                                                                          | ; KU70_HUMAN; Q6FG89_HUMAN; Q6IC76_HUMAN                                                                                                                                                                                                                                                                                                                    |
| 888            | IPI00477616                                                     | PPP2R4                                | 373                                  | 373  | 373  | 4.2E+04                               | 4.2E+04 | 4.2E+04 | 6.2             | 2                     | 1         | 1         | 0        | 0         | REGULATORY SUBUNIT PR 53 OF PROTEIN PHOSPHATASE 2A ISOFORM B.                                                                                                                                                                                                                                                                                                                                                                                                                                                                                                                                                                                                                        | P14618; P14786; Q53GK4; Q8WUW7; Q9E76; Q9BW95; Q8NY17; Q9UKJ31; Q9UKK4; Q9UPF2                                                                                                                                                  | PPP2R4_HUMAN                                                                                                                                                                                                                                                                                                                                                |
| 889            | IPI00479186                                                     | PKM2                                  | 531                                  | 531  | 531  | 5.8E+04                               | 5.8E+04 | 5.8E+04 | 63.7            | 46                    | 1         | 1         | 0        | 0         | ISOFORM M2 OF PYRUVATE KINASE ISOZYMES M1/M2. ISOFORM SHORT OF HETEROGENEOUS NUCLEAR RIBONUCLEOPROTEIN U.; HETEROGENEOUS NUCLEAR RIBONUCLEOPROTEIN U. ISOFORM A.; HETEROGENEOUS NUCLEAR RIBONUCLEOPROTEIN U.                                                                                                                                                                                                                                                                                                                                                                                                                                                                         | Q75507; Q00839; Q5R117; Q5R119; Q7Z4Q5; Q8N174; Q96BA7; Q96H99; Q53GN6; Q53XU2; Q9Y6E3                                                                                                                                          | Q9UKK4_HUMAN; Q9UKK4_HUMAN                                                                                                                                                                                                                                                                                                                                  |
| 890            | IPI00479217; IPI00644079; IPI00644224                           | HNRPU                                 | 549                                  | 825  | 727  | 6.2E+04                               | 9.1E+04 | 8.0E+04 | 6.1             | 3                     | 0         | 1         | 0        | 0         | HETEROGENEOUS NUCLEAR RIBONUCLEOPROTEIN U.                                                                                                                                                                                                                                                                                                                                                                                                                                                                                                                                                                                                                                           | Q5R117; Q5R119; Q7Z4Q5; Q8N174; Q96BA7; Q96H99; Q53GN6; Q53XU2; Q9Y6E3                                                                                                                                                          | HNRPU_HUMAN; Q5R117_HUMAN; Q5R119_HUMAN; Q7Z4Q5_HUMAN; Q96BA7_HUMAN; Q96H99_HUMAN; Q53GN6_HUMAN; Q53XU2_HUMAN; Q9Y6E3_HUMAN                                                                                                                                                                                                                                 |
| 891            | IPI00549672                                                     | PSMD13                                | 377                                  | 377  | 377  | 4.3E+04                               | 4.3E+04 | 4.3E+04 | 19.1            | 5                     | 1         | 1         | 0        | 0         | HSPC027.                                                                                                                                                                                                                                                                                                                                                                                                                                                                                                                                                                                                                                                                             | Q6IAI0; Q9BWL4; Q9NTH1; Q9P037; Q9PJ03; Q9Y310; Q8TAN8; Q9NSJ5; Q9LJW0                                                                                                                                                          | CV028_HUMAN                                                                                                                                                                                                                                                                                                                                                 |
| 892            | IPI00550689                                                     | C22orf28                              | 505                                  | 505  | 505  | 5.5E+04                               | 5.5E+04 | 5.5E+04 | 5.0             | 2                     | 0         | 1         | 0        | 0         | UPF0027 PROTEIN C22ORF28.                                                                                                                                                                                                                                                                                                                                                                                                                                                                                                                                                                                                                                                            | Q9LJW0; Q0EFA1; Q2L6F9; Q53GL9                                                                                                                                                                                                  | DCTN4_HUMAN; Q9NSJ5_HUMAN; Q0EFA1_HUMAN; Q2L6F9_HUMAN; Q53GL9_HUMAN                                                                                                                                                                                                                                                                                         |
| 893            | IPI00550852                                                     | DCTN4                                 | 460                                  | 460  | 460  | 5.2E+04                               | 5.2E+04 | 5.2E+04 | 5.9             | 2                     | 0         | 1         | 0        | 0         | DYNACTIN SUBUNIT 4.                                                                                                                                                                                                                                                                                                                                                                                                                                                                                                                                                                                                                                                                  | Q5JNX2; Q6U2F6; P29401; Q53EM5; Q6MZE3; Q8TBA3; Q96HH3                                                                                                                                                                          | DCTN4_HUMAN; Q9NSJ5_HUMAN; Q0EFA1_HUMAN; Q2L6F9_HUMAN; Q53GL9_HUMAN                                                                                                                                                                                                                                                                                         |
| 894            | IPI00641829                                                     | ATP6V1G2; BAT1                        | 443                                  | 443  | 443  | 5.1E+04                               | 5.1E+04 | 5.1E+04 | 7.7             | 3                     | 1         | 1         | 0        | 0         | BAT1 PROTEIN.                                                                                                                                                                                                                                                                                                                                                                                                                                                                                                                                                                                                                                                                        | Q5JNX2; Q6U2F6; P29401; Q53EM5; Q6MZE3; Q8TBA3; Q96HH3                                                                                                                                                                          | Q5JNX2_HUMAN; Q6U2F6_HUMAN                                                                                                                                                                                                                                                                                                                                  |
| 895            | IPI00643525                                                     | C4A                                   | 1744                                 | 1744 | 1744 | 1.9E+05                               | 1.9E+05 | 1.9E+05 | 13.1            | 15                    | 1         | 1         | 0        | 0         | COMPLEMENT COMPONENT 4A. TRANSKETOLASE.; TRANSKETOLASE VARIANT (FRAGMENT).; 37 KDA PROTEIN.; HYPOTHETICAL PROTEIN DKFZP686J13123.; 39 KDA PROTEIN. TUBULIN ALPHA-8 CHAIN.; 52 KDA PROTEIN.                                                                                                                                                                                                                                                                                                                                                                                                                                                                                           | P29401; Q53EM5; Q6MZE3; Q8TBA3; Q96HH3; Q2M3N4; Q9NY65                                                                                                                                                                          | ; Q53EM5_HUMAN; Q6MZE3_HUMAN; TKT_HUMAN ; TBA8_HUMAN                                                                                                                                                                                                                                                                                                        |
| 896            | IPI00643920; IPI00788802; IPI00789310; IPI00792641; IPI00793119 | TKT                                   | 339                                  | 623  | 497  | 3.7E+04                               | 6.8E+04 | 5.4E+04 | 6.4             | 2                     | 0         | 1         | 0        | 0         | PROTEIN DKFZP686J13123.; 39 KDA PROTEIN.                                                                                                                                                                                                                                                                                                                                                                                                                                                                                                                                                                                                                                             | Q96HH3                                                                                                                                                                                                                          | TKT_HUMAN                                                                                                                                                                                                                                                                                                                                                   |
| 897            | IPI00646909; IPI00791613                                        | TUBA8                                 | 449                                  | 467  | 458  | 5.0E+04                               | 5.2E+04 | 5.1E+04 | 37.6            | 12                    | 1         | 1         | 0        | 0         | TUBULIN ALPHA-8 CHAIN.; 52 KDA PROTEIN.                                                                                                                                                                                                                                                                                                                                                                                                                                                                                                                                                                                                                                              | Q2M3N4; Q9NY65                                                                                                                                                                                                                  | ; TBA8_HUMAN                                                                                                                                                                                                                                                                                                                                                |



| Protein Group <sup>1</sup> | IPI ID                                             | IPI gene name | Amino Acids in Sequence <sup>1</sup> |      |      | Protein Molecular Weight <sup>1</sup> |         |         | Seq. Cov. (max) | Unique Peptides (max) | Detection |           |          |           | Protein name                                                                                                                                                                                                                                                                       | Uniprot Id                                                                                                             | Uniprot Entry Name                                                                                                                         |
|----------------------------|----------------------------------------------------|---------------|--------------------------------------|------|------|---------------------------------------|---------|---------|-----------------|-----------------------|-----------|-----------|----------|-----------|------------------------------------------------------------------------------------------------------------------------------------------------------------------------------------------------------------------------------------------------------------------------------------|------------------------------------------------------------------------------------------------------------------------|--------------------------------------------------------------------------------------------------------------------------------------------|
|                            |                                                    |               | Min.                                 | Max. | Mean | Min.                                  | Max.    | Mean    |                 |                       | Expt. I-1 | Expt. I-2 | Expt. II | Expt. III |                                                                                                                                                                                                                                                                                    |                                                                                                                        |                                                                                                                                            |
| 933                        | IPI00291165; IPI00744711                           | PNPT1         | 783                                  | 785  | 784  | 8.6E+04                               | 8.6E+04 | 8.6E+04 | 3.4             | 2                     | 1         | 0         | 0        | 0         | POLYRIBONUCLEOTIDE NUCLEOTIDYLTRANSFERASE 1, MITOCHONDRIAL PRECURSOR.; 86 KDA PROTEIN.                                                                                                                                                                                             | Q53SU0; Q68CN1; Q7Z7D1; Q81WX1; Q81TC38; Q96105; Q9BRU3; Q9BVX0 P21980; Q16436; Q6B838; Q6DKH2; Q6ZTL3; Q9BTN7; Q9UHS5 | ; PNPT1_HUMAN                                                                                                                              |
| 934                        | IPI00294578                                        | TGM2          | 687                                  | 687  | 687  | 7.7E+04                               | 7.7E+04 | 7.7E+04 | 4.2             | 2                     | 1         | 0         | 0        | 0         | ISOFORM 1 OF PROTEIN-GLUTAMINE GAMMA-GLUTAMYLTRANSFERASE 2.                                                                                                                                                                                                                        | P53778; Q14260; Q6IC53; Q6N076; Q99588; Q99672                                                                         | Q6B838_HUMAN; Q6DKH2_HUMAN; Q6ZTL3_HUMAN; TGM2_HUMAN                                                                                       |
| 935                        | IPI00296283                                        | MAPK12        | 367                                  | 367  | 367  | 4.2E+04                               | 4.2E+04 | 4.2E+04 | 10.6            | 3                     | 1         | 0         | 0        | 0         | MITOGEN-ACTIVATED PROTEIN KINASE 12. ISOFORM 1 OF TRIPEPTIDYL-PEPTIDASE 1 PRECURSOR.; ISOFORM 3 OF TRIPEPTIDYL-PEPTIDASE 1 PRECURSOR.                                                                                                                                              | Q14773; Q53HP2; Q53HT1; Q5JAK6; Q6LX56; Q96C37                                                                         | MK12_HUMAN; Q6IC53_HUMAN; Q6N076_HUMAN                                                                                                     |
| 936                        | IPI00298237; IPI00554538; IPI00554617              | TPP1          | 320                                  | 563  | 480  | 3.4E+04                               | 6.1E+04 | 5.2E+04 | 5.0             | 2                     | 1         | 0         | 0        | 0         | 1 PRECURSOR.; ISOFORM 2 OF TRIPEPTIDYL-PEPTIDASE 1 PRECURSOR.                                                                                                                                                                                                                      | P48444; Q52M80; Q6MZV5                                                                                                 | Q53HP2_HUMAN; TPP1_HUMAN                                                                                                                   |
| 937                        | IPI00298520; IPI00514053                           | ARCN1         | 511                                  | 552  | 532  | 5.7E+04                               | 6.2E+04 | 5.9E+04 | 4.2             | 2                     | 1         | 0         | 0        | 0         | HYPOTHETICAL PROTEIN DKFZP686M09245.; COATOMER SUBUNIT DELTA.                                                                                                                                                                                                                      | P01141; P04004; Q9BSH7                                                                                                 | COPD_HUMAN; Q6MZV5_HUMAN                                                                                                                   |
| 938                        | IPI00298971                                        | VTN           | 478                                  | 478  | 478  | 5.4E+04                               | 5.4E+04 | 5.4E+04 | 5.7             | 2                     | 1         | 0         | 0        | 0         | VITRONECTIN PRECURSOR.                                                                                                                                                                                                                                                             | Q13586; Q8N382                                                                                                         | VTNC_HUMAN                                                                                                                                 |
| 939                        | IPI00299063                                        | STIM1         | 685                                  | 685  | 685  | 7.7E+04                               | 7.7E+04 | 7.7E+04 | 3.7             | 2                     | 1         | 0         | 0        | 0         | STROMAL INTERACTION MOLECULE 1 PRECURSOR.                                                                                                                                                                                                                                          | Q13586; Q8N382                                                                                                         | Q8N382_HUMAN; STIM1_HUMAN                                                                                                                  |
| 940                        | IPI00301280                                        | TMEM43        | 400                                  | 400  | 400  | 4.5E+04                               | 4.5E+04 | 4.5E+04 | 11.8            | 2                     | 1         | 0         | 0        | 0         | TRANSMEMBRANE PROTEIN 43.                                                                                                                                                                                                                                                          |                                                                                                                        |                                                                                                                                            |
| 941                        | IPI00302329                                        | MYH8          | 1937                                 | 1937 | 1937 | 2.2E+05                               | 2.2E+05 | 2.2E+05 | 38.4            | 135                   | 1         | 0         | 0        | 0         | MYOSIN-8.                                                                                                                                                                                                                                                                          | P13535; Q14910 P29329; Q05C45; Q14214; Q14918; Q15346; Q53QO2; Q53TG8; Q6PJ54; Q7Z2R0; Q96MF8; Q9Y521                  | MYH8_HUMAN                                                                                                                                 |
| 942                        | IPI00303335                                        | NEB           | 6669                                 | 6669 | 6669 | 7.7E+05                               | 7.7E+05 | 7.7E+05 | 0.6             | 3                     | 1         | 0         | 0        | 0         | NEBULIN.                                                                                                                                                                                                                                                                           | Q96CM8; Q9H7G2                                                                                                         |                                                                                                                                            |
| 943                        | IPI00304071                                        | FLJ20920      | 615                                  | 615  | 615  | 6.8E+04                               | 6.8E+04 | 6.8E+04 | 7.5             | 2                     | 1         | 0         | 0        | 0         | HYPOTHETICAL PROTEIN FLJ20920.                                                                                                                                                                                                                                                     | Q60376; Q53G29; Q96FY2; Q9P042; Q9UJZ1                                                                                 | Q96CM8_HUMAN; Q9H7G2_HUMAN                                                                                                                 |
| 944                        | IPI00334190                                        | STOML2        | 356                                  | 356  | 356  | 3.9E+04                               | 3.9E+04 | 3.9E+04 | 8.7             | 2                     | 1         | 0         | 0        | 0         | STOMATIN-LIKE PROTEIN 2.                                                                                                                                                                                                                                                           | P55942; Q92788; Q96F39                                                                                                 | STML2_HUMAN                                                                                                                                |
| 945                        | IPI00375333                                        | RRAD          | 308                                  | 308  | 308  | 3.3E+04                               | 3.3E+04 | 3.3E+04 | 10.1            | 2                     | 1         | 0         | 0        | 0         | GTP-BINDING PROTEIN RAD. ISOFORM 1 OF EUKARYOTIC TRANSLATION INITIATION FACTOR 3 SUBUNIT 9.; ISOFORM 2 OF EUKARYOTIC TRANSLATION INITIATION FACTOR 3 SUBUNIT 9.; 99 KDA PROTEIN.                                                                                                   | Q96F39                                                                                                                 | Q92788_HUMAN; RAD_HUMAN                                                                                                                    |
| 946                        | IPI00396370; IPI00719752; IPI00747447              | EIF3S9        | 814                                  | 874  | 854  | 9.2E+04                               | 9.9E+04 | 9.7E+04 | 3.6             | 2                     | 1         | 0         | 0        | 0         | ISOFORM 1 OF PLASMINOGEN ACTIVATOR INHIBITOR 1 RNA-BINDING PROTEIN.; ISOFORM 4 OF PLASMINOGEN ACTIVATOR INHIBITOR 1 RNA-BINDING PROTEIN.; ISOFORM 2 OF PLASMINOGEN ACTIVATOR INHIBITOR 1 RNA-BINDING PROTEIN.; ISOFORM 3 OF PLASMINOGEN ACTIVATOR INHIBITOR 1 RNA-BINDING PROTEIN. | Q5VU19; Q5VU20; Q5VU21; Q5VU22; Q63HR1; Q8NC51; Q8WUHO; Q96SE2; Q98TY3; Q98UM4; Q9Y367; Q9Y453                         | ; IF39_HUMAN; Q59FS8_HUMAN; Q86UM1_HUMAN; Q96G38_HUMAN                                                                                     |
| 947                        | IPI00410693; IPI00412714; IPI00470497; IPI00470498 | SERBP1        | 387                                  | 408  | 398  | 4.2E+04                               | 4.5E+04 | 4.4E+04 | 8.7             | 2                     | 1         | 0         | 0        | 0         | ACTIVATOR INHIBITOR 1 RNA-BINDING PROTEIN.                                                                                                                                                                                                                                         | Q63HR1; Q8NC51; Q8WUHO; Q96SE2; Q98TY3; Q98UM4; Q9Y367; Q9Y453                                                         | PAIRB_HUMAN; Q5VU19_HUMAN; Q5VU20_HUMAN; Q5VU21_HUMAN; Q5VU22_HUMAN; Q63HR1_HUMAN                                                          |
| 948                        | IPI00465260                                        | GARS          | 751                                  | 751  | 751  | 8.5E+04                               | 8.5E+04 | 8.5E+04 | 3.2             | 2                     | 1         | 0         | 0        | 0         | GARS PROTEIN.                                                                                                                                                                                                                                                                      | Q9Y367; Q9Y453                                                                                                         |                                                                                                                                            |
| 949                        | IPI00604624                                        | NIF3L1        | 377                                  | 377  | 377  | 4.2E+04                               | 4.2E+04 | 4.2E+04 | 10.3            | 2                     | 1         | 0         | 0        | 0         | HYPOTHETICAL PROTEIN NIF3L1.                                                                                                                                                                                                                                                       | Q53TX4; Q658J0                                                                                                         | Q53TX4_HUMAN; Q658J0_HUMAN                                                                                                                 |
| 950                        | IPI00642211                                        | RNPEP         | 658                                  | 658  | 658  | 7.3E+04                               | 7.3E+04 | 7.3E+04 | 5.3             | 2                     | 1         | 0         | 0        | 0         | AMINOPEPTIDASE B. ALANYL-TRANSFER RNA SYNTHETASE FAMILY PROTEIN.; ISOFORM 1 OF ALANYL-TRNA SYNTHETASE DOMAIN-CONTAINING PROTEIN 1.                                                                                                                                                 | Q7RU04                                                                                                                 | Q7RU04_HUMAN                                                                                                                               |
| 951                        | IPI00748490; IPI00827636                           | AARSD1        | 412                                  | 586  | 499  | 4.5E+04                               | 6.6E+04 | 5.6E+04 | 7.3             | 2                     | 1         | 0         | 0        | 0         | DOMAIN-CONTAINING PROTEIN 1.                                                                                                                                                                                                                                                       | Q9BTE6                                                                                                                 | ; AASD1_HUMAN                                                                                                                              |
| 952                        | IPI00791835                                        | ANK1          | 1040                                 | 1040 | 1040 | 1.2E+05                               | 1.2E+05 | 1.2E+05 | 3.1             | 2                     | 1         | 0         | 0        | 0         | PROTEIN.                                                                                                                                                                                                                                                                           | A2KBB9; A2KBC0; A2KBC1; A2KBC2; A2KBC3; A2KBC4; A2KBC5; A2KBC6; A2KBC7; A2KBC8                                         | A2KBB9_HUMAN; A2KBC0_HUMAN; A2KBC1_HUMAN; A2KBC2_HUMAN; A2KBC3_HUMAN; A2KBC4_HUMAN; A2KBC5_HUMAN; A2KBC6_HUMAN; A2KBC7_HUMAN; A2KBC8_HUMAN |
| 953                        | IPI00828062                                        |               | 238                                  | 238  | 238  | 2.5E+04                               | 2.5E+04 | 2.5E+04 | 19.3            | 3                     | 1         | 0         | 0        | 0         | ANTI-(ED-B) SCFV (FRAGMENT).                                                                                                                                                                                                                                                       |                                                                                                                        |                                                                                                                                            |
| 954                        | IPI00830047                                        |               | 106                                  | 106  | 106  | 1.1E+04                               | 1.1E+04 | 1.1E+04 | 32.1            | 2                     | 1         | 0         | 0        | 0         | PROTEIN.                                                                                                                                                                                                                                                                           |                                                                                                                        |                                                                                                                                            |

<sup>1</sup>Values for min (minimum), max (maximum) and mean are for the proteins in each group

<sup>2</sup>Proteins that share the same group of assigned peptides

Type of file: table

Label: Table 2

Filename: PubMed\_17911086\_Hojlund\_Table2.pdf

## M700304-MCP 2

## Supplemental Table 2. Peptides identified in human muscle biopsy tissue

| Protein group <sup>1</sup> | IPI ID                                | IPI gene name | Protein name                                                                                                                           | Sequence             | Prev. amino acid                                   | Next amino acid | Peptide identification probability                                         | Mascot ions score       | Modification                 | Observed m/z | Precursor charge state | Mass error (ppm) | First amino acid | Last amino acid | Shared <sup>2</sup> |     |     |     |    |
|----------------------------|---------------------------------------|---------------|----------------------------------------------------------------------------------------------------------------------------------------|----------------------|----------------------------------------------------|-----------------|----------------------------------------------------------------------------|-------------------------|------------------------------|--------------|------------------------|------------------|------------------|-----------------|---------------------|-----|-----|-----|----|
| 1                          | IPI00000690; IPI00157908              | AIFM1         | ISOFORM 1 OF APOPTOSIS-INDUCING FACTOR 1, MITOCHONDRIAL PRECURSOR.; ISOFORM 3 OF APOPTOSIS-INDUCING FACTOR 1, MITOCHONDRIAL PRECURSOR. | AALSASEGEEVPQDK      | K                                                  | A               | 95.00%                                                                     | 71                      |                              | 765.8689     | 2                      | 0.7              | 113              | 127             | No                  |     |     |     |    |
|                            |                                       |               |                                                                                                                                        | ALGTEVIQLFPEK        | R                                                  | G               | 95.00%                                                                     | 84                      |                              | 722.9114     | 2                      | 6.7              | 321              | 333             | No                  |     |     |     |    |
|                            |                                       |               |                                                                                                                                        | ALGTEVIQLFPEKGNMGK   | R                                                  | I               | 95.00%                                                                     | 33                      | M16: Oxidation               | 650.0184     | 3                      | 9.1              | 325              | 342             | No                  |     |     |     |    |
|                            |                                       |               |                                                                                                                                        | APSHVPFLLIGGGTAFAAAR | K                                                  | S               | 95.00%                                                                     | 80                      |                              | 1012.5640    | 2                      | 5.6              | 128              | 148             | No                  |     |     |     |    |
|                            |                                       |               |                                                                                                                                        | APSHVPFLLIGGGTAFAAAR | K                                                  | S               | 95.00%                                                                     | 74                      |                              | 675.3788     | 3                      | 6.2              | 124              | 144             | No                  |     |     |     |    |
|                            |                                       |               |                                                                                                                                        | ELWFSDDPNVTK         | K                                                  | T               | 95.00%                                                                     | 63                      |                              | 725.8503     | 2                      | 5.0              | 174              | 185             | No                  |     |     |     |    |
|                            |                                       |               |                                                                                                                                        | GVIFYLR              | K                                                  | D               | 95.00%                                                                     | 36                      |                              | 434.2602     | 2                      | 3.7              | 559              | 565             | No                  |     |     |     |    |
|                            |                                       |               |                                                                                                                                        | ILPEYLSNWTMEK        | K                                                  | V               | 95.00%                                                                     | 60                      | M11: Oxidation               | 820.4120     | 2                      | 7.3              | 343              | 355             | No                  |     |     |     |    |
|                            |                                       |               |                                                                                                                                        | ISGLGLTPEQK          | R                                                  | Q               | 95.00%                                                                     | 59                      |                              | 571.8262     | 2                      | 1.8              | 99               | 109             | No                  |     |     |     |    |
|                            |                                       |               |                                                                                                                                        | KAALSASEGEEVPQDK     | K                                                  | A               | 95.00%                                                                     | 79                      |                              | 829.9232     | 2                      | 8.8              | 112              | 127             | No                  |     |     |     |    |
|                            |                                       |               |                                                                                                                                        | KVETDHIVAAGLEPNVELAK | R                                                  | T               | 95.00%                                                                     | 64                      |                              | 744.7514     | 3                      | 6.6              | 384              | 404             | No                  |     |     |     |    |
|                            |                                       |               |                                                                                                                                        | KVETDHIVAAGLEPNVELAK | R                                                  | T               | 95.00%                                                                     | 34                      |                              | 558.8163     | 4                      | 8.0              | 388              | 408             | No                  |     |     |     |    |
|                            |                                       |               |                                                                                                                                        | LNDGSQITYEK          | K                                                  | C               | 95.00%                                                                     | 63                      |                              | 634.3160     | 2                      | 5.6              | 245              | 255             | No                  |     |     |     |    |
|                            |                                       |               |                                                                                                                                        | TGGLIEDSDFGGFR       | K                                                  | V               | 95.00%                                                                     | 79                      |                              | 735.8522     | 2                      | 6.7              | 405              | 418             | No                  |     |     |     |    |
|                            |                                       |               |                                                                                                                                        | VLIVSEDPPELPMRPPLSK  | R                                                  | E               | 95.00%                                                                     | 46                      | M13: Oxidation               | 733.7342     | 3                      | 6.0              | 155              | 173             | No                  |     |     |     |    |
|                            |                                       |               |                                                                                                                                        | VMPNAIVQSVGVSSGK     | K                                                  | L               | 95.00%                                                                     | 102                     | M2: Oxidation                | 794.9280     | 2                      | 7.2              | 359              | 374             | No                  |     |     |     |    |
|                            |                                       |               |                                                                                                                                        | VMPNAIVQSVGVSSGK     | K                                                  | L               | 95.00%                                                                     | 52                      | M2: Oxidation                | 530.2852     | 3                      | 2.1              | 363              | 378             | No                  |     |     |     |    |
|                            |                                       |               |                                                                                                                                        | 2                    | IPI00000792; IPI00641565; IPI00642016; IPI00647366 | CRYZ            | QUINONE OXIDOREDUCTASE.; 26 KDA PROTEIN.; 22 KDA PROTEIN.; 32 KDA PROTEIN. | DLSLLSHGGR              | K                            | V            | 95.00%                 | 33               |                  | 527.7882        | 2                   | 3.7 | 233 | 242 | No |
|                            |                                       |               |                                                                                                                                        |                      |                                                    |                 |                                                                            | KPLLPYTPGSDVAGVIEAVGDNA | R                            | K            | 95.00%                 | 58               |                  | 906.1515        | 3                   | 7.0 | 62  | 88  | No |
| SAFK                       | R                                     | D             | 95.00%                                                                                                                                 |                      |                                                    |                 |                                                                            | 61                      |                              | 470.2830     | 2                      | 7.0              | 26               | 34              | No                  |     |     |     |    |
| VAAEAHENIIHGSGATGK         | K                                     | M             | 95.00%                                                                                                                                 |                      |                                                    |                 |                                                                            | 77                      |                              | 845.9377     | 2                      | 9.5              | 308              | 324             | No                  |     |     |     |    |
| VFEFGGPEVLK                | R                                     | L             | 95.00%                                                                                                                                 |                      |                                                    |                 |                                                                            | 52                      |                              | 611.3336     | 2                      | 6.0              | 13               | 23              | No                  |     |     |     |    |
|                            |                                       |               |                                                                                                                                        |                      |                                                    |                 |                                                                            |                         |                              |              |                        |                  |                  |                 |                     |     |     |     |    |
| 3                          | IPI00000811; IPI00789119; IPI00796198 | PSMB6         | PROTEASOME SUBUNIT BETA TYPE 6 PRECURSOR.; 20 KDA PROTEIN.; 12 KDA PROTEIN.                                                            | LAAIAESGVER          | R                                                  | Q               | 95.00%                                                                     | 72                      |                              | 558.3111     | 2                      | 7.3              | 210              | 220             | No                  |     |     |     |    |
|                            |                                       |               |                                                                                                                                        | QVLLGDQIPK           | R                                                  | F               | 95.00%                                                                     | 31                      |                              | 555.8340     | 2                      | 6.8              | 221              | 230             | No                  |     |     |     |    |
| 4                          | IPI00000816                           | YWHAE         | 14-3-3 PROTEIN EPSILON.                                                                                                                | VTDKLTPIHDR          | R                                                  | I               | 95.00%                                                                     | 32                      |                              | 647.8652     | 2                      | 8.0              | 64               | 74              | No                  |     |     |     |    |
|                            |                                       |               |                                                                                                                                        | AAFDDAIAELDTLSEESYK  | K                                                  | D               | 95.00%                                                                     | 110                     |                              | 1044.4970    | 2                      | 9.5              | 197              | 215             | No                  |     |     |     |    |
|                            |                                       |               |                                                                                                                                        | AAFDDAIAELDTLSEESYK  | K                                                  | D               | 95.00%                                                                     | 80                      |                              | 696.6644     | 3                      | 5.4              | 197              | 215             | No                  |     |     |     |    |
|                            |                                       |               |                                                                                                                                        | AASDIAMTELPPTHPIR    | K                                                  | L               | 95.00%                                                                     | 45                      | M7: Oxidation                | 918.4792     | 2                      | 9.6              | 154              | 170             | No                  |     |     |     |    |
|                            |                                       |               |                                                                                                                                        | AASDIAMTELPPTHPIR    | K                                                  | L               | 95.00%                                                                     | 81                      | M7: Oxidation                | 612.6551     | 3                      | 9.1              | 154              | 170             | No                  |     |     |     |    |
|                            |                                       |               |                                                                                                                                        | DSTLIMQLLR           | K                                                  | D               | 95.00%                                                                     | 65                      | M6: Oxidation                | 603.3372     | 2                      | 8.2              | 216              | 225             | Yes                 |     |     |     |    |
|                            |                                       |               |                                                                                                                                        | DSTLIMQLLR           | K                                                  | D               | 95.00%                                                                     | 63                      |                              | 595.3373     | 2                      | 4.3              | 216              | 225             | No                  |     |     |     |    |
|                            |                                       |               |                                                                                                                                        | EAAENSLVAYK          | K                                                  | A               | 95.00%                                                                     | 59                      |                              | 597.8077     | 2                      | 5.8              | 143              | 153             | No                  |     |     |     |    |
|                            |                                       |               |                                                                                                                                        | KVAGMDVELTVEER       | K                                                  | N               | 95.00%                                                                     | 84                      | M5: Oxidation                | 796.4111     | 2                      | 8.9              | 29               | 42              | No                  |     |     |     |    |
|                            |                                       |               |                                                                                                                                        | KVAGMDVELTVEER       | K                                                  | N               | 95.00%                                                                     | 31                      | M5: Oxidation                | 531.2753     | 3                      | 6.4              | 29               | 42              | No                  |     |     |     |    |
|                            |                                       |               |                                                                                                                                        | NLLSVAYK             | R                                                  | N               | 95.00%                                                                     | 33                      |                              | 907.5325     | 1                      | 7.9              | 43               | 50              | Yes                 |     |     |     |    |
|                            |                                       |               |                                                                                                                                        | NLLSVAYK             | R                                                  | N               | 95.00%                                                                     | 39                      |                              | 454.2683     | 2                      | 3.9              | 43               | 50              | Yes                 |     |     |     |    |
|                            |                                       |               |                                                                                                                                        | QMVETELK             | R                                                  | L               | 95.00%                                                                     | 45                      | M2: Oxidation                | 497.2534     | 2                      | 6.2              | 87               | 94              | No                  |     |     |     |    |
|                            |                                       |               |                                                                                                                                        | VAGMDVELTVEER        | K                                                  | N               | 95.00%                                                                     | 99                      | M4: Oxidation, M8: Oxidation | 732.3632     | 2                      | 9.1              | 30               | 42              | No                  |     |     |     |    |
|                            |                                       |               |                                                                                                                                        |                      |                                                    |                 |                                                                            |                         |                              |              |                        |                  |                  |                 |                     |     |     |     |    |
|                            |                                       |               |                                                                                                                                        | 5                    | IPI00000874; IPI00640741                           | PRDX1           | PEROXIREDOXIN-1.; 19 KDA PROTEIN.                                          | YDEMVESMK               | R                            | K            | 95.00%                 | 59               |                  | 582.2376        | 2                   | 6.3 | 20  | 28  | No |
|                            |                                       |               |                                                                                                                                        |                      |                                                    |                 |                                                                            | YLAEFATGNDR             | R                            | K            | 95.00%                 | 42               |                  | 628.8040        | 2                   | 7.1 | 131 | 141 | No |
| ADEGISFR                   | K                                     | G             | 95.00%                                                                                                                                 |                      |                                                    |                 |                                                                            | 56                      |                              | 447.7229     | 2                      | 6.5              | 121              | 128             | No                  |     |     |     |    |
| ATAVMPDGGQFK               | K                                     | D             | 95.00%                                                                                                                                 |                      |                                                    |                 |                                                                            | 37                      | M5: Oxidation                | 1180.5790    | 1                      | 9.6              | 17               | 27              | No                  |     |     |     |    |
| ATAVMPDGGQFK               | K                                     | D             | 95.00%                                                                                                                                 |                      |                                                    |                 |                                                                            | 55                      | M5: Oxidation                | 590.7916     | 2                      | 6.7              | 17               | 27              | No                  |     |     |     |    |
| DISLSDYK                   | K                                     | G             | 95.00%                                                                                                                                 |                      |                                                    |                 |                                                                            | 65                      |                              | 940.4717     | 1                      | 9.5              | 28               | 35              | No                  |     |     |     |    |
| DISLSDYK                   | K                                     | G             | 95.00%                                                                                                                                 |                      |                                                    |                 |                                                                            | 39                      |                              | 470.7386     | 2                      | 6.9              | 28               | 35              | No                  |     |     |     |    |
| GLFIIDDK                   | R                                     | G             | 95.00%                                                                                                                                 |                      |                                                    |                 |                                                                            | 39                      |                              | 920.5165     | 1                      | 7.5              | 129              | 136             | No                  |     |     |     |    |
| GLFIIDDK                   | R                                     | G             | 95.00%                                                                                                                                 |                      |                                                    |                 |                                                                            | 53                      |                              | 460.7613     | 2                      | 5.6              | 129              | 136             | No                  |     |     |     |    |
| IGHAPAPNFK                 | K                                     | A             | 95.00%                                                                                                                                 |                      |                                                    |                 |                                                                            | 32                      |                              | 980.5358     | 1                      | 3.9              | 8                | 16              | No                  |     |     |     |    |
| IGHAPAPNFK                 | K                                     | A             | 95.00%                                                                                                                                 |                      |                                                    |                 |                                                                            | 28                      |                              | 490.7730     | 2                      | 6.4              | 8                | 16              | No                  |     |     |     |    |
| KQGGLGPMNIPLVSDPK          | K                                     | R             | 95.00%                                                                                                                                 |                      |                                                    |                 |                                                                            | 33                      | M8: Oxidation                | 883.9849     | 2                      | 8.0              | 93               | 109             | No                  |     |     |     |    |
| KQGGLGPMNIPLVSDPK          | K                                     | R             | 95.00%                                                                                                                                 |                      |                                                    |                 |                                                                            | 39                      | M8: Oxidation                | 589.6590     | 3                      | 7.6              | 93               | 109             | No                  |     |     |     |    |
| KQGGLGPMNIPLVSDPKR         | K                                     | T             | 95.00%                                                                                                                                 |                      |                                                    |                 |                                                                            | 36                      | M8: Oxidation                | 481.5211     | 4                      | 6.2              | 93               | 110             | No                  |     |     |     |    |
| LVQAFQFTDK                 | R                                     | H             | 95.00%                                                                                                                                 |                      |                                                    |                 |                                                                            | 70                      |                              | 598.8239     | 2                      | 6.9              | 159              | 168             | No                  |     |     |     |    |
| QGGLGPMNIPLVSDPK           | K                                     | R             | 95.00%                                                                                                                                 |                      |                                                    |                 |                                                                            | 54                      | M7: Oxidation                | 819.9382     | 2                      | 9.6              | 94               | 109             | No                  |     |     |     |    |
| QGGLGPMNIPLVSDPKR          | K                                     | T             | 95.00%                                                                                                                                 |                      |                                                    |                 |                                                                            | 29                      | M7: Oxidation                | 598.9940     | 3                      | 6.8              | 94               | 110             | No                  |     |     |     |    |

|    |                         |        |                                                                |                         |   |   |        |     |                |           |   |     |      |      |     |
|----|-------------------------|--------|----------------------------------------------------------------|-------------------------|---|---|--------|-----|----------------|-----------|---|-----|------|------|-----|
|    |                         |        |                                                                | QITVNDLPVGR             | R | S | 95.00% | 73  |                | 606.3436  | 2 | 3.6 | 141  | 151  | Yes |
|    |                         |        |                                                                | QITVNDLPVGR             | R | S | 95.00% | 28  |                | 404.5660  | 3 | 6.1 | 141  | 151  | Yes |
|    |                         |        |                                                                | TIAQDYGVLK              | R | A | 95.00% | 31  |                | 1107.6140 | 1 | 8.2 | 111  | 120  | No  |
|    |                         |        |                                                                | TIAQDYGVLK              | R | A | 95.00% | 73  |                | 554.3098  | 2 | 6.0 | 111  | 120  | No  |
| 6  | IPI0000875; IPI00747497 | EEF1G  | ELONGATION FACTOR 1-GAMMA.; 50 KDA PROTEIN.                    | ALJAAQYSGAQR            | K | V | 95.00% | 94  |                | 674.3751  | 2 | 3.0 | 18   | 30   | No  |
|    |                         |        |                                                                | EYFSWEGAFQHVGR          | R | A | 95.00% | 54  |                | 842.9003  | 2 | 9.9 | 415  | 428  | No  |
|    |                         |        |                                                                | ILGLLDAYLK              | R | T | 95.00% | 81  |                | 559.8497  | 2 | 7.7 | 138  | 147  | No  |
|    |                         |        |                                                                | KLDPGSEETQTLVR          | R | E | 95.00% | 46  |                | 786.9181  | 2 | 3.0 | 401  | 414  | No  |
|    |                         |        |                                                                | KLDPGSEETQTLVR          | R | E | 95.00% | 32  |                | 524.9486  | 3 | 4.2 | 401  | 414  | No  |
|    |                         |        |                                                                | LDPGSEETQTLVR           | K | E | 95.00% | 34  |                | 722.8750  | 2 | 9.4 | 402  | 414  | No  |
|    |                         |        |                                                                | STFVLDEFKR              | K | K | 95.00% | 61  |                | 621.3339  | 2 | 5.6 | 286  | 295  | No  |
|    |                         |        |                                                                | STFVLDEFKR              | K | K | 95.00% | 42  |                | 414.5581  | 3 | 4.5 | 286  | 295  | No  |
| 7  | IPI00001091             | AFG3L2 | AFG3-LIKE PROTEIN 2.                                           | GLGYAQYLPK              | K | E | 95.00% | 42  |                | 555.3058  | 2 | 3.7 | 602  | 611  | No  |
|    |                         |        |                                                                | GMGGFLSVGETTAK          | R | V | 95.00% | 75  | M2: Oxidation  | 685.8368  | 2 | 2.1 | 284  | 297  | No  |
|    |                         |        |                                                                | HFEQAIER                | K | V | 95.00% | 32  |                | 515.2620  | 2 | 4.2 | 544  | 551  | No  |
|    |                         |        |                                                                | NLETLQELGIEGENR         | R | V | 95.00% | 126 |                | 921.9710  | 2 | 7.8 | 225  | 240  | No  |
|    |                         |        |                                                                | NLETLQELGIEGENR         | R | V | 95.00% | 43  |                | 614.9824  | 3 | 6.4 | 225  | 240  | No  |
|    |                         |        |                                                                | VALLLLEK                | K | E | 95.00% | 54  |                | 449.8041  | 2 | 2.8 | 726  | 733  | No  |
|    |                         |        |                                                                | VGQISFDLPR              | K | Q | 95.00% | 59  |                | 566.3138  | 2 | 3.0 | 670  | 679  | No  |
|    |                         |        |                                                                | VSEEIFFR                | R | I | 95.00% | 56  |                | 542.2803  | 2 | 4.8 | 633  | 641  | No  |
|    |                         |        |                                                                | VTQSAYAQIVQFGMNEK       | K | V | 95.00% | 89  | M14: Oxidation | 965.4816  | 2 | 9.0 | 653  | 669  | No  |
| 8  | IPI00001539             | ACAA2  | 3-KETOACYL-COA THIOLASE, MITOCHONDRIAL.                        | AANDAGYFNDEMAPIEVK      | K | T | 95.00% | 100 | M12: Oxidation | 985.9534  | 2 | 9.2 | 192  | 209  | No  |
|    |                         |        |                                                                | AANDAGYFNDEMAPIEVK      | K | T | 95.00% | 37  | M12: Oxidation | 657.6349  | 3 | 4.2 | 192  | 209  | No  |
|    |                         |        |                                                                | DFTATDLSEFAAK           | K | A | 95.00% | 77  |                | 708.3437  | 2 | 7.1 | 26   | 38   | No  |
|    |                         |        |                                                                | DGTVTAGNASGVADGAGAVIIAS |   |   |        |     |                |           |   |     |      |      |     |
|    |                         |        |                                                                | EDAVK                   | K | K | 95.00% | 80  |                | 839.4294  | 3 | 9.6 | 242  | 269  | No  |
|    |                         |        |                                                                | DGTVTAGNASGVADGAGAVIIAS |   |   |        |     |                |           |   |     |      |      |     |
|    |                         |        |                                                                | EDAVKK                  | K | H | 95.00% | 65  |                | 882.1277  | 3 | 9.1 | 242  | 270  | No  |
|    |                         |        |                                                                | DMDLVEVNEAFAPQYLAVER    | K | S | 95.00% | 94  | M2: Oxidation  | 1163.0680 | 2 | 9.2 | 313  | 332  | No  |
|    |                         |        |                                                                | ETPALTINR               | K | L | 95.00% | 31  |                | 507.7844  | 2 | 2.5 | 82   | 90   | No  |
|    |                         |        |                                                                | GVFVVAEK                | R | R | 95.00% | 32  |                | 790.4889  | 1 | 7.8 | 6    | 13   | No  |
|    |                         |        |                                                                | ITAHLVHELK              | R | R | 95.00% | 29  |                | 594.8503  | 2 | 6.2 | 361  | 370  | No  |
|    |                         |        |                                                                | RTPFGAYGGLLK            | K | D | 95.00% | 36  |                | 640.3659  | 2 | 5.9 | 14   | 25   | No  |
|    |                         |        |                                                                | SLDLDISK                | R | T | 95.00% | 56  |                | 445.7487  | 2 | 6.7 | 333  | 340  | No  |
|    |                         |        |                                                                | TNVNGGAIALGHPLGGSGSR    | K | I | 95.00% | 113 |                | 917.9863  | 2 | 6.7 | 341  | 360  | No  |
|    |                         |        |                                                                | TNVNGGAIALGHPLGGSGSR    | K | I | 95.00% | 63  |                | 612.3249  | 3 | 3.7 | 341  | 360  | No  |
|    |                         |        |                                                                | TPFGAYGGLLK             | R | D | 95.00% | 39  |                | 1123.6250 | 1 | 8.9 | 15   | 25   | No  |
|    |                         |        |                                                                | TPFGAYGGLLK             | R | D | 95.00% | 70  |                | 562.3151  | 2 | 6.3 | 15   | 25   | No  |
|    |                         |        |                                                                | VSPETVDSVIMGNVLQSSSDAIY |   |   |        |     |                |           |   |     |      |      |     |
|    |                         |        |                                                                | LAR                     | K | H | 95.00% | 50  | M11: Oxidation | 923.1413  | 3 | 9.5 | 46   | 71   | No  |
| 9  | IPI00001589             | TIMM13 | MITOCHONDRIAL IMPORT INNER MEMBRANE TRANSLOCASE SUBUNIT TIM13. | LDPGLIMEQVK             | K | V | 95.00% | 32  | M7: Oxidation  | 629.8458  | 2 | 9.4 | 17   | 27   | No  |
|    |                         |        |                                                                | VQIAVANAEQLLR           | K | M | 95.00% | 52  |                | 776.9520  | 2 | 9.6 | 28   | 41   | No  |
| 10 | IPI00001639             | KPNB1  | IMPORTIN BETA-1 SUBUNIT.                                       | AAVENLPTFLVELSR         | R | V | 95.00% | 95  |                | 829.9642  | 2 | 5.3 | 28   | 42   | No  |
|    |                         |        |                                                                | AAVENLPTFLVELSR         | R | V | 95.00% | 48  |                | 553.6446  | 3 | 3.8 | 28   | 42   | No  |
|    |                         |        |                                                                | GALQYLVPIQTTLTK         | K | Q | 95.00% | 81  |                | 880.0279  | 2 | 6.1 | 317  | 332  | No  |
|    |                         |        |                                                                | GALQYLVPIQTTLTK         | K | Q | 95.00% | 79  |                | 587.0220  | 3 | 7.4 | 317  | 332  | No  |
|    |                         |        |                                                                | LAATNALLNSLEFTK         | K | A | 95.00% | 103 |                | 803.4517  | 2 | 6.5 | 192  | 206  | No  |
|    |                         |        |                                                                | LQQVLQMESHIQSTSDR       | R | I | 95.00% | 38  | M7: Oxidation  | 672.6670  | 3 | 1.7 | 558  | 574  | No  |
|    |                         |        |                                                                | SNEILTALIQGMR           | K | K | 95.00% | 47  | M12: Oxidation | 731.3964  | 2 | 7.7 | 170  | 182  | No  |
|    |                         |        |                                                                | TTLVIMER                | K | L | 95.00% | 33  | M6: Oxidation  | 489.7711  | 2 | 5.1 | 550  | 557  | No  |
|    |                         |        |                                                                | TVSPDRLELEAAQK          | K | F | 95.00% | 45  |                | 778.9223  | 2 | 5.3 | 10   | 23   | No  |
|    |                         |        |                                                                | VAALQNLVK               | R | I | 95.00% | 37  |                | 478.3020  | 2 | 2.3 | 235  | 243  | No  |
|    |                         |        |                                                                | VLANPGNSQVAR            | R | V | 95.00% | 44  |                | 613.3404  | 2 | 6.4 | 43   | 54   | No  |
| 11 | IPI00001730             | FHOD1  | FH1/FH2 DOMAIN-CONTAINING PROTEIN.                             | AALLNFDEFVSK            | K | D | 95.00% | 77  |                | 712.8802  | 2 | 7.1 | 718  | 730  | No  |
|    |                         |        |                                                                | AEPIWELPTR              | K | A | 95.00% | 51  |                | 606.3265  | 2 | 2.1 | 526  | 535  | No  |
|    |                         |        |                                                                | AETLAGAMPNEAGGHPDAR     | R | Q | 95.00% | 69  | M8: Oxidation  | 940.9390  | 2 | 7.3 | 463  | 481  | No  |
|    |                         |        |                                                                | AETLAGAMPNEAGGHPDAR     | R | Q | 95.00% | 34  | M8: Oxidation  | 627.6254  | 3 | 2.3 | 463  | 481  | No  |
|    |                         |        |                                                                | EIAEPLFDLK              | R | V | 95.00% | 43  |                | 587.8243  | 2 | 3.9 | 796  | 805  | No  |
|    |                         |        |                                                                | FLENVAAATEK             | R | Q | 95.00% | 74  |                | 661.3381  | 2 | 3.3 | 443  | 454  | No  |
|    |                         |        |                                                                | FSGVAGEAPSNPSVPAVSSGP   |   |   |        |     |                |           |   |     |      |      |     |
|    |                         |        |                                                                | GR                      | K | G | 95.00% | 45  |                | 1113.5720 | 2 | 9.3 | 1021 | 1044 | No  |
|    |                         |        |                                                                | HLGTAGTDVDLR            | R | T | 95.00% | 55  |                | 627.8314  | 2 | 8.5 | 313  | 324  | No  |
|    |                         |        |                                                                | LYSSSGPELR              | K | R | 95.00% | 47  |                | 554.7885  | 2 | 4.8 | 127  | 136  | No  |
|    |                         |        |                                                                | SGLGDDLQALGLSK          | K | G | 95.00% | 96  |                | 736.9078  | 2 | 7.7 | 1144 | 1158 | No  |
|    |                         |        |                                                                | SNAINIGLTTLPVHVIK       | R | A | 95.00% | 21  |                | 629.7100  | 3 | 3.9 | 700  | 717  | No  |
|    |                         |        |                                                                | TQLVLYENALK             | R | L | 95.00% | 39  |                | 646.3712  | 2 | 6.4 | 325  | 335  | No  |
|    |                         |        |                                                                | VDFEQLTENLQGLER         | K | R | 95.00% | 103 |                | 895.9567  | 2 | 7.2 | 890  | 904  | No  |

|                         |             |       |                            |                           |               |           |        |     |                    |           |    |      |     |     |    |  |  |  |  |
|-------------------------|-------------|-------|----------------------------|---------------------------|---------------|-----------|--------|-----|--------------------|-----------|----|------|-----|-----|----|--|--|--|--|
| 12                      | IPI00002149 | SAR1B | GTP-BINDING PROTEIN SAR1B. | VGMEQLVQNATFR             | K             | C         | 95.00% | 40  | M3: Oxidation      | 754.8852  | 2  | 6.2  | 806 | 818 | No |  |  |  |  |
|                         |             |       |                            | IDRPEAISEER               | K             | L         | 95.00% | 32  |                    | 657.8417  | 2  | 7.6  | 136 | 146 | No |  |  |  |  |
|                         |             |       |                            | LLSKSEELDSLMTDETIANVPILIL |               |           |        |     |                    |           |    |      |     |     |    |  |  |  |  |
|                         |             |       |                            | GNK                       | R             | I         | 95.00% | 63  | M12: Oxidation     | 1038.8930 | 3  | 4.8  | 108 | 135 | No |  |  |  |  |
|                         |             |       |                            | LVFLGLDNAGK               | K             | T         | 95.00% | 60  |                    | 573.8346  | 2  | 7.8  | 28  | 38  | No |  |  |  |  |
|                         |             |       |                            | DGIIDKEDLR                | R             | D         | 95.00% | 46  |                    | 1173.6210 | 1  | 7.6  | 43  | 52  | No |  |  |  |  |
|                         |             |       |                            | DGIIDKEDLR                | R             | D         | 95.00% | 66  |                    | 587.3118  | 2  | 3.2  | 43  | 52  | No |  |  |  |  |
| 13                      | IPI00002352 | MYLPF | MYOSIN LIGHT CHAIN 2.      | DGIIDKEDLRDTFAAMGR        | R             | L         | 95.00% | 37  | M16: Oxidation     | 1020.0070 | 2  | 9.7  | 43  | 60  | No |  |  |  |  |
|                         |             |       |                            | DTFAAMGR                  | R             | L         | 95.00% | 44  | M6: Oxidation      | 442.7033  | 2  | 5.9  | 53  | 60  | No |  |  |  |  |
|                         |             |       |                            | DTFAAMGR                  | R             | L         | 95.00% | 32  |                    | 868.4038  | 1  | 5.8  | 53  | 60  | No |  |  |  |  |
|                         |             |       |                            | DTFAAMGR                  | R             | L         | 95.00% | 46  |                    | 434.7052  | 2  | 4.5  | 53  | 60  | No |  |  |  |  |
|                         |             |       |                            | EAFTVIDQNR                | K             | D         | 95.00% | 77  |                    | 1192.6040 | 1  | 6.3  | 33  | 42  | No |  |  |  |  |
|                         |             |       |                            | EAFTVIDQNR                | K             | D         | 95.00% | 91  |                    | 596.8051  | 2  | 5.1  | 33  | 42  | No |  |  |  |  |
|                         |             |       |                            | EAFTVIDQNRDGIIDK          | K             | E         | 95.00% | 55  |                    | 917.4791  | 2  | 8.5  | 33  | 48  | No |  |  |  |  |
|                         |             |       |                            | EAFTVIDQNRDGIIDK          | K             | E         | 95.00% | 34  |                    | 611.9881  | 3  | 7.5  | 33  | 48  | No |  |  |  |  |
|                         |             |       |                            | EAFTVIDQNRDGIIDKEDLR      | K             | D         | 95.00% | 42  |                    | 1174.1090 | 2  | 9.0  | 33  | 52  | No |  |  |  |  |
|                         |             |       |                            | EAFTVIDQNRDGIIDKEDLR      | K             | D         | 95.00% | 57  |                    | 783.0724  | 3  | 5.2  | 33  | 52  | No |  |  |  |  |
|                         |             |       |                            | EASGPIINFTVFLTMFGEK       | K             | L         | 95.00% | 116 | M14: Oxidation     | 1002.5000 | 2  | 7.0  | 74  | 91  | No |  |  |  |  |
|                         |             |       |                            | EASGPIINFTVFLTMFGEK       | K             | L         | 95.00% | 63  | M14: Oxidation     | 668.6692  | 3  | 6.5  | 74  | 91  | No |  |  |  |  |
|                         |             |       |                            | EASGPIINFTVFLTMFGEK       | K             | L         | 95.00% | 116 |                    | 994.5029  | 2  | 7.0  | 74  | 91  | No |  |  |  |  |
|                         |             |       |                            | EASGPIINFTVFLTMFGEK       | K             | L         | 95.00% | 71  |                    | 663.3384  | 3  | 7.9  | 74  | 91  | No |  |  |  |  |
|                         |             |       |                            | EDLRDTFAAMGR              | K             | L         | 95.00% | 31  | M10: Oxidation     | 466.5565  | 3  | 4.0  | 49  | 60  | No |  |  |  |  |
|                         |             |       |                            | FSQEEIK                   | R             | N         | 95.00% | 52  |                    | 440.7258  | 2  | 2.3  | 132 | 138 | No |  |  |  |  |
|                         |             |       |                            | GADPEDVITGAFK             | K             | V         | 95.00% | 107 |                    | 660.3326  | 2  | 6.8  | 94  | 106 | No |  |  |  |  |
|                         |             |       |                            | GADPEDVITGAFK             | K             | V         | 95.00% | 66  |                    | 440.5567  | 3  | 4.5  | 94  | 106 | No |  |  |  |  |
|                         |             |       |                            | GADPEDVITGAFKVDPEGK       | K             | G         | 95.00% | 42  |                    | 686.6912  | 3  | 8.8  | 94  | 113 | No |  |  |  |  |
|                         |             |       |                            | LKGADPEDVITGAFK           | K             | V         | 95.00% | 90  |                    | 780.9232  | 2  | 6.9  | 92  | 106 | No |  |  |  |  |
|                         |             |       |                            | LKGADPEDVITGAFK           | K             | V         | 95.00% | 50  |                    | 520.9510  | 3  | 6.1  | 92  | 106 | No |  |  |  |  |
|                         |             |       |                            | LNVKNEELDAMMK             | R             | E         | 95.00% | 69  | M11: Oxidation     | 775.8879  | 2  | 7.7  | 61  | 73  | No |  |  |  |  |
|                         |             |       |                            | LNVKNEELDAMMK             | R             | E         | 95.00% | 61  | M11: Oxidation     | 783.8856  | 2  | 7.9  | 61  | 73  | No |  |  |  |  |
|                         |             |       |                            |                           |               |           |        |     | M11: Oxidation,    |           |    |      |     |     |    |  |  |  |  |
|                         |             |       |                            | LNVKNEELDAMMK             | R             | E         | 95.00% | 64  | M12: Oxidation     | 783.8760  | 2  | -4.4 | 61  | 73  | No |  |  |  |  |
|                         |             |       |                            |                           |               |           |        |     | M11: Oxidation,    |           |    |      |     |     |    |  |  |  |  |
|                         |             |       |                            | LNVKNEELDAMMK             | R             | E         | 95.00% | 47  | M12: Oxidation     | 522.9226  | 3  | 0.6  | 61  | 73  | No |  |  |  |  |
|                         |             |       |                            | LNVKNEELDAMMK             | R             | E         | 95.00% | 60  | M12: Oxidation     | 775.8878  | 2  | 7.5  | 61  | 73  | No |  |  |  |  |
|                         |             |       |                            | LNVKNEELDAMMK             | R             | E         | 95.00% | 45  | M12: Oxidation     | 517.5928  | 3  | 4.3  | 61  | 73  | No |  |  |  |  |
|                         |             |       |                            | LNVKNEELDAMMK             | R             | E         | 95.00% | 80  |                    | 767.8875  | 2  | 3.9  | 61  | 73  | No |  |  |  |  |
|                         |             |       |                            | NEELDAMMK                 | K             | E         | 95.00% | 59  | M7: Oxidation      | 548.7391  | 2  | 4.5  | 65  | 73  | No |  |  |  |  |
|                         |             |       |                            | NEELDAMMK                 | K             | E         | 95.00% | 68  | M7: Oxidation      | 556.7370  | 2  | 5.2  | 65  | 73  | No |  |  |  |  |
|                         |             |       |                            |                           |               |           |        |     | M7: Oxidation, M8: |           |    |      |     |     |    |  |  |  |  |
|                         |             |       |                            | NEELDAMMK                 | K             | E         | 95.00% | 68  | Oxidation          | 556.7370  | 2  | 5.2  | 65  | 73  | No |  |  |  |  |
|                         |             |       |                            | NEELDAMMK                 | K             | E         | 95.00% | 38  | M8: Oxidation      | 1096.4730 | 1  | 7.1  | 65  | 73  | No |  |  |  |  |
|                         |             |       |                            | NEELDAMMK                 | K             | E         | 95.00% | 58  | M8: Oxidation      | 548.7397  | 2  | 5.5  | 65  | 73  | No |  |  |  |  |
|                         |             |       |                            | NEELDAMMK                 | K             | E         | 95.00% | 63  |                    | 1080.4810 | 1  | 9.5  | 65  | 73  | No |  |  |  |  |
|                         |             |       |                            | NEELDAMMK                 | K             | E         | 95.00% | 62  |                    | 540.7403  | 2  | 1.9  | 65  | 73  | No |  |  |  |  |
|                         |             |       |                            | NICYVITHGDAK              | K             | D         | 95.00% | 84  |                    | 667.3389  | 2  | 9.2  | 156 | 167 | No |  |  |  |  |
|                         |             |       |                            | NMWAAFPDPVGGNVVYK         | K             | N         | 95.00% | 89  | M2: Oxidation      | 948.9410  | 2  | 8.0  | 139 | 155 | No |  |  |  |  |
|                         |             |       |                            | NMWAAFPDPVGGNVVYK         | K             | N         | 95.00% | 44  | M2: Oxidation      | 632.9595  | 3  | 2.0  | 139 | 155 | No |  |  |  |  |
|                         |             |       |                            | NMWAAFPDPVGGNVVYK         | K             | N         | 95.00% | 118 |                    | 940.9445  | 2  | 9.0  | 139 | 155 | No |  |  |  |  |
|                         |             |       |                            | ALJELATR                  | K             | T         | 95.00% | 28  |                    | 999.6271  | 1  | 6.8  | 457 | 465 | No |  |  |  |  |
|                         |             |       |                            | ALJELATR                  | K             | T         | 95.00% | 70  |                    | 500.3157  | 2  | 3.2  | 457 | 465 | No |  |  |  |  |
|                         |             |       |                            | DAFVAIVQSVK               | R             | N         | 95.00% | 54  |                    | 1176.6690 | 1  | 5.0  | 588 | 598 | No |  |  |  |  |
|                         |             |       |                            | DAFVAIVQSVK               | R             | N         | 95.00% | 75  |                    | 588.8383  | 2  | 5.1  | 588 | 598 | No |  |  |  |  |
|                         |             |       |                            | DAISGIGTDEK               | K             | C         | 95.00% | 32  |                    | 553.2738  | 2  | 1.7  | 103 | 113 | No |  |  |  |  |
|                         |             |       |                            | DAYERDLEADIGDTSGHFQK      | K             | M         | 95.00% | 57  |                    | 794.0455  | 3  | 6.3  | 136 | 156 | No |  |  |  |  |
|                         |             |       |                            | DLEADIGDTSGHFQK           | R             | M         | 95.00% | 113 |                    | 873.4283  | 2  | 8.0  | 141 | 156 | No |  |  |  |  |
|                         |             |       |                            | DLEADIGDTSGHFQK           | R             | M         | 95.00% | 56  |                    | 582.6213  | 3  | 7.8  | 141 | 156 | No |  |  |  |  |
|                         |             |       |                            | DLIADLK                   | K             | Y         | 95.00% | 45  |                    | 787.4626  | 1  | 7.4  | 69  | 75  | No |  |  |  |  |
|                         |             |       |                            | DLIADLKYELTGK             | K             | F         | 95.00% | 77  |                    | 739.9139  | 2  | 6.2  | 69  | 81  | No |  |  |  |  |
|                         |             |       |                            | DLIADLKYELTGK             | K             | F         | 95.00% | 33  |                    | 493.6115  | 3  | 5.4  | 69  | 81  | No |  |  |  |  |
| DLMTDLK                 | R           | S     | 95.00%                     | 29                        | M3: Oxidation | 426.2160  | 2      | 6.5 | 412                | 418       | No |      |     |     |    |  |  |  |  |
| DLMTDLKSEISGDLAR        | R           | L     | 95.00%                     | 62                        | M3: Oxidation | 890.4506  | 2      | 7.5 | 412                | 427       | No |      |     |     |    |  |  |  |  |
| DLMTDLKSEISGDLAR        | R           | L     | 95.00%                     | 55                        | M3: Oxidation | 593.9691  | 3      | 6.4 | 412                | 427       | No |      |     |     |    |  |  |  |  |
| DLMTDLKSEISGDLAR        | R           | L     | 95.00%                     | 50                        |               | 882.4510  | 2      | 5.1 | 412                | 427       | No |      |     |     |    |  |  |  |  |
| EAILDIISR               | K           | S     | 95.00%                     | 90                        |               | 565.8278  | 2      | 4.8 | 41                 | 50        | No |      |     |     |    |  |  |  |  |
| EDAQVAAEILEIADTPSGDK    | R           | T     | 95.00%                     | 127                       |               | 1036.5100 | 2      | 4.0 | 521                | 540       | No |      |     |     |    |  |  |  |  |
| EDAQVAAEILEIADTPSGDK    | R           | T     | 95.00%                     | 38                        |               | 691.3428  | 3      | 4.2 | 521                | 540       | No |      |     |     |    |  |  |  |  |
| EDAQVAAEILEIADTPSGDKTSL |             |       |                            |                           |               |           |        |     |                    |           |    |      |     |     |    |  |  |  |  |
| ETR                     | R           | F     | 95.00%                     | 87                        |               | 920.4633  | 3      | 5.6 | 521                | 546       | No |      |     |     |    |  |  |  |  |



|    |                          |        |                |                                          |   |   |        |     |                |           |   |      |     |     |    |
|----|--------------------------|--------|----------------|------------------------------------------|---|---|--------|-----|----------------|-----------|---|------|-----|-----|----|
|    |                          |        |                | AGGIETIANEYSDR                           | R | C | 95.00% | 62  |                | 748.3599  | 2 | 6.0  | 20  | 33  | No |
|    |                          |        |                | EDIYAVEIVGGATR                           | K | I | 95.00% | 68  |                | 746.8933  | 2 | 9.2  | 333 | 346 | No |
|    |                          |        |                | EFSDIVVYPYISLR                           | R | W | 95.00% | 70  |                | 868.4728  | 2 | 6.1  | 391 | 405 | No |
|    |                          |        |                | ELSTTLNADEAVTR                           | K | G | 95.00% | 62  |                | 760.3884  | 2 | 5.6  | 361 | 374 | No |
|    |                          |        |                | LKETAESVLK                               | K | K | 95.00% | 35  |                | 559.3285  | 2 | 1.9  | 125 | 134 | No |
|    |                          |        |                | MQVDQEEPHVEEQQQTPAEN                     |   |   |        |     |                |           |   |      |     |     |    |
|    |                          |        |                | K                                        | K | A | 95.00% | 52  | M1: Oxidation  | 880.0652  | 3 | 4.1  | 522 | 543 | No |
|    |                          |        |                | NFTTEQVTAMLSK                            | R | L | 95.00% | 98  | M10: Oxidation | 799.9130  | 2 | 5.1  | 111 | 124 | No |
|    |                          |        |                | SNLAYDIVQLPTGLTGIK                       | K | V | 95.00% | 83  |                | 952.0374  | 2 | 6.6  | 85  | 102 | No |
|    |                          |        |                | SNLAYDIVQLPTGLTGIK                       | K | V | 95.00% | 66  |                | 635.0279  | 3 | 7.1  | 85  | 102 | No |
|    |                          |        |                | VLATAFDTTLGR                             | K | K | 95.00% | 88  |                | 661.3635  | 2 | 5.5  | 222 | 234 | No |
|    |                          |        |                | SODIUM/POTASSIUM-TRANSPORTING ATPASE     |   |   |        |     |                |           |   |      |     |     |    |
|    |                          |        |                | ALPHA-2 CHAIN PRECURSOR.; CATION-        |   |   |        |     |                |           |   |      |     |     |    |
|    |                          |        |                | TRANSPORTING ATPASE.                     |   |   |        |     |                |           |   |      |     |     |    |
| 19 | IPI00003021; IPI00640401 | ATP1A2 |                | ADIGIAMGISGSDVSK                         | K | Q | 95.00% | 73  | M7: Oxidation  | 768.8896  | 2 | 8.7  | 725 | 740 | No |
|    |                          |        |                | DMTSEQLDELK                              | K | N | 95.00% | 60  | M2: Oxidation  | 719.3482  | 2 | 7.0  | 669 | 680 | No |
|    |                          |        |                | DTAGDASESALLK                            | R | C | 95.00% | 66  |                | 639.3187  | 2 | 5.4  | 444 | 456 | No |
|    |                          |        |                | FDTDELNFPTEK                             | K | L | 95.00% | 35  |                | 728.3406  | 2 | 6.0  | 568 | 579 | No |
|    |                          |        |                | GVGIISEGNETVEDIAAR                       | K | L | 95.00% | 116 |                | 915.4734  | 2 | 7.8  | 627 | 644 | No |
|    |                          |        |                | IATLASGLEVGR                             | R | T | 95.00% | 107 |                | 593.8454  | 2 | 2.8  | 268 | 279 | No |
|    |                          |        |                | LNIPMSQVNP                               | R | E | 95.00% | 52  | M5: Oxidation  | 642.8454  | 2 | 7.4  | 645 | 655 | No |
|    |                          |        |                | NHTEIVFAR                                | K | T | 95.00% | 30  |                | 543.7916  | 2 | 5.2  | 681 | 689 | No |
|    |                          |        |                | NMVPPQALVIR                              | K | E | 95.00% | 41  | M2: Oxidation  | 642.8618  | 2 | 4.7  | 161 | 171 | No |
|    |                          |        |                | QGAIIVATGDGVNDSPALK                      | R | K | 95.00% | 112 |                | 906.4850  | 2 | 6.5  | 705 | 723 | No |
|    |                          |        |                | SPEFTHENPLETR                            | R | N | 95.00% | 63  |                | 778.8776  | 2 | 8.2  | 226 | 238 | No |
|    |                          |        |                | VAEIPFNSTNK                              | K | Y | 95.00% | 34  |                | 610.3238  | 2 | 6.2  | 475 | 485 | No |
|    |                          |        |                | VDNSSLTGESEPOQR                          | K | S | 95.00% | 85  |                | 810.3841  | 2 | 5.5  | 211 | 225 | No |
|    |                          |        |                | VIMVTGDHPITAK                            | K | A | 95.00% | 62  | M3: Oxidation  | 699.3825  | 2 | 7.7  | 610 | 622 | No |
| 20 | IPI00003362              | HSPA5  | HSPA5 PROTEIN. | AKFEELNMDLFR                             | R | S | 95.00% | 63  | M8: Oxidation  | 764.8805  | 2 | 4.0  | 326 | 337 | No |
|    |                          |        |                | AKFEELNMDLFR                             | R | S | 95.00% | 39  | M8: Oxidation  | 510.2559  | 3 | 3.2  | 326 | 337 | No |
|    |                          |        |                | DAGTLAGLNMVR                             | K | I | 95.00% | 54  | M11: Oxidation | 617.3226  | 2 | 8.9  | 187 | 198 | No |
|    |                          |        |                | DNHLLGTFDLTGIPPAPR                       | K | G | 95.00% | 48  |                | 645.3473  | 3 | 6.4  | 476 | 493 | No |
|    |                          |        |                | ELEEIVQPIISK                             | K | L | 95.00% | 68  |                | 699.4017  | 2 | 4.4  | 623 | 634 | No |
|    |                          |        |                | IEWLESHQDADIEDFK                         | K | A | 95.00% | 40  |                | 658.9782  | 3 | 5.2  | 603 | 618 | No |
|    |                          |        |                | IEWLESHQDADIEDFKAK                       | K | K | 95.00% | 39  |                | 725.3547  | 3 | 3.5  | 603 | 620 | No |
|    |                          |        |                | IINEPTAAAIAYGLDK                         | R | R | 95.00% | 122 |                | 830.4572  | 2 | 6.3  | 199 | 214 | No |
|    |                          |        |                | IINEPTAAAIAYGLDK                         | R | R | 95.00% | 68  |                | 553.9742  | 3 | 6.5  | 199 | 214 | No |
|    |                          |        |                | IINEPTAAAIAYGLDKR                        | R | E | 95.00% | 112 |                | 908.5094  | 2 | 7.6  | 199 | 215 | No |
|    |                          |        |                | IINEPTAAAIAYGLDKR                        | R | E | 95.00% | 55  |                | 606.0097  | 3 | 8.9  | 199 | 215 | No |
|    |                          |        |                | ITPSYVAFTPEGER                           | R | L | 95.00% | 78  |                | 783.8976  | 2 | 4.3  | 62  | 75  | No |
|    |                          |        |                | KKELEEIVQPIISK                           | K | L | 95.00% | 38  |                | 827.4983  | 2 | 5.7  | 621 | 634 | No |
|    |                          |        |                | KKELEEIVQPIISK                           | K | L | 95.00% | 31  |                | 552.0007  | 3 | 4.3  | 621 | 634 | No |
|    |                          |        |                | KSDIDEIVLVGGSTR                          | K | I | 95.00% | 117 |                | 794.9345  | 2 | 4.0  | 354 | 368 | No |
|    |                          |        |                | KSDIDEIVLVGGSTR                          | K | I | 95.00% | 33  |                | 530.2916  | 3 | 2.8  | 354 | 368 | No |
|    |                          |        |                | KVTHAVVTVPAYFNDAQR                       | K | Q | 95.00% | 54  |                | 672.6971  | 3 | 4.6  | 165 | 182 | No |
|    |                          |        |                | NELESYAYSLK                              | R | N | 95.00% | 81  |                | 658.8268  | 2 | 6.4  | 564 | 574 | No |
|    |                          |        |                | NQLTSNPENTVFDAK                          | K | R | 95.00% | 112 |                | 839.4127  | 2 | 5.5  | 83  | 97  | No |
|    |                          |        |                | SDIDEIVLVGGSTR                           | K | I | 95.00% | 50  |                | 730.8892  | 2 | 7.3  | 355 | 368 | No |
|    |                          |        |                | SQIFSTASDNQPTVTIK                        | K | V | 95.00% | 106 |                | 918.9733  | 2 | 2.4  | 449 | 465 | No |
|    |                          |        |                | SQIFSTASDNQPTVTIK                        | K | V | 95.00% | 38  |                | 612.9861  | 3 | 4.6  | 449 | 465 | No |
|    |                          |        |                | TFAPEEISAMVLTK                           | K | M | 95.00% | 78  | M10: Oxidation | 776.9043  | 2 | 4.8  | 140 | 153 | No |
|    |                          |        |                | TKPYIQVDIGGGQTK                          | K | T | 95.00% | 91  |                | 802.9398  | 2 | 4.2  | 125 | 139 | No |
|    |                          |        |                | TKPYIQVDIGGGQTK                          | K | T | 95.00% | 48  |                | 535.6284  | 3 | 2.8  | 125 | 139 | No |
|    |                          |        |                | TWNDPSVQQDIK                             | R | F | 95.00% | 82  |                | 715.8525  | 2 | 3.8  | 103 | 114 | No |
|    |                          |        |                | VEIANDQGNR                               | R | I | 95.00% | 52  |                | 1228.6370 | 1 | 7.0  | 51  | 61  | No |
|    |                          |        |                | VEIANDQGNR                               | R | I | 95.00% | 81  |                | 614.8218  | 2 | 5.9  | 51  | 61  | No |
|    |                          |        |                | VTHAVVTVPAYFNDAQR                        | K | Q | 95.00% | 83  |                | 944.4955  | 2 | 6.2  | 166 | 182 | No |
|    |                          |        |                | VTHAVVTVPAYFNDAQR                        | K | Q | 95.00% | 38  |                | 629.9987  | 3 | 4.7  | 166 | 182 | No |
|    |                          |        |                | VYEGERPLTK                               | K | D | 95.00% | 48  |                | 596.3259  | 2 | 5.4  | 466 | 475 | No |
|    |                          |        |                | 2,4-DIENOYL-COA REDUCTASE, MITOCHONDRIAL |   |   |        |     |                |           |   |      |     |     |    |
|    |                          |        |                | PRECURSOR.                               |   |   |        |     |                |           |   |      |     |     |    |
| 21 | IPI00003482              | DEC1   |                | AMLPPNSFQGK                              | K | V | 95.00% | 42  | M2: Oxidation  | 603.3060  | 2 | 4.4  | 50  | 60  | No |
|    |                          |        |                | ATAEQISSQTGNK                            | K | V | 95.00% | 52  |                | 667.8370  | 2 | 8.2  | 98  | 110 | No |
|    |                          |        |                | EQWDTIEELIR                              | K | K | 95.00% | 59  |                | 716.3656  | 2 | 7.8  | 320 | 330 | No |
|    |                          |        |                | FNVIQPGPIK                               | R | T | 95.00% | 35  |                | 556.8318  | 2 | 7.9  | 235 | 244 | No |
|    |                          |        |                | VAFITGGGTGLGK                            | K | G | 95.00% | 67  |                | 589.3372  | 2 | 6.9  | 61  | 73  | No |
|    |                          |        |                | VAGHPNIVINNAAGNFISPTER                   | K | L | 95.00% | 73  |                | 764.4065  | 3 | 6.2  | 134 | 155 | No |
|    |                          |        |                | ISOFORM 1 OF DUAL SPECIFICITY MITOGEN-   |   |   |        |     |                |           |   |      |     |     |    |
|    |                          |        |                | ACTIVATED PROTEIN KINASE KINASE6.        |   |   |        |     |                |           |   |      |     |     |    |
| 22 | IPI00003814              | MAP2K6 |                | ADDLEPIMELGR                             | K | G | 95.00% | 51  | M8: Oxidation  | 687.8363  | 2 | 5.2  | 50  | 61  | No |
|    |                          |        |                | DVKPSNLINALGQVK                          | R | M | 95.00% | 43  |                | 848.0018  | 2 | 8.9  | 179 | 194 | No |
|    |                          |        |                | DVKPSNLINALGQVK                          | R | M | 95.00% | 44  |                | 565.6689  | 3 | 6.1  | 179 | 194 | No |
|    |                          |        |                | EAFEQPQTSSTPPR                           | K | D | 95.00% | 47  |                | 787.8737  | 2 | -3.7 | 18  | 31  | No |

|    |                                       |        |                                                                                 |                         |   |   |        |     |                |           |   |      |     |     |     |
|----|---------------------------------------|--------|---------------------------------------------------------------------------------|-------------------------|---|---|--------|-----|----------------|-----------|---|------|-----|-----|-----|
|    |                                       |        |                                                                                 | GTDVASFVK               | K | L | 95.00% | 32  |                | 462.2486  | 2 | 5.9  | 321 | 329 | No  |
|    |                                       |        |                                                                                 | QVVEEPSQLPADK           | K | F | 95.00% | 32  |                | 768.9023  | 2 | 3.7  | 269 | 282 | No  |
| 23 | IPI00003815; IPI00794402; IPI00796541 | ARHGDI | RHO GDP-DISSOCIATION INHIBITOR 1.; 28 KDA PROTEIN.; 26 KDA PROTEIN.             | IDKTDYMGVSGYPR          | K | A | 95.00% | 64  | M7: Oxidation  | 809.3879  | 2 | 5.8  | 139 | 152 | No  |
|    |                                       |        |                                                                                 | SIQEIQLDKDDES LR        | K | K | 95.00% | 41  |                | 639.9910  | 3 | 8.7  | 34  | 49  | No  |
|    |                                       |        |                                                                                 | SIQEIQLDKDDES LRK       | K | Y | 95.00% | 43  |                | 682.6899  | 3 | 9.0  | 34  | 50  | No  |
|    |                                       |        |                                                                                 | TDYMGVSGYGPR            | K | A | 95.00% | 32  | M4: Oxidation  | 631.2843  | 2 | 6.7  | 142 | 152 | No  |
| 24 | IPI00003833                           | MTCH2  | MITOCHONDRIAL CARRIER HOMOLOG 2.                                                | EVSSSFDHVIK             | K | E | 95.00% | 33  |                | 624.3213  | 2 | 6.1  | 112 | 122 | No  |
|    |                                       |        |                                                                                 | GLFTGLTPR               | R | L | 95.00% | 43  |                | 481.2806  | 2 | 6.3  | 69  | 77  | No  |
|    |                                       |        |                                                                                 | SAATLITHPFHVITLR        | R | S | 95.00% | 36  |                | 593.0146  | 3 | 8.8  | 132 | 147 | No  |
|    |                                       |        |                                                                                 | VLIQVGYEPLPPTIGR        | K | N | 95.00% | 56  |                | 876.5143  | 2 | 8.3  | 26  | 41  | No  |
|    |                                       |        |                                                                                 | VLQHYQESDKGEELGPGNVQK   | K | E | 95.00% | 61  |                | 785.7311  | 3 | 8.3  | 91  | 111 | No  |
| 25 | IPI00003865                           | HSPA8  | ISOFORM 1 OF HEAT SHOCK COGNATE 71 KDA PROTEIN.                                 | ARFEELNADLFR            | R | G | 95.00% | 63  |                | 740.8885  | 2 | 9.6  | 300 | 311 | Yes |
|    |                                       |        |                                                                                 | ARFEELNADLFR            | R | G | 95.00% | 51  |                | 494.2596  | 3 | 5.6  | 300 | 311 | Yes |
|    |                                       |        |                                                                                 | DAGTIAGLNVL             | K | I | 95.00% | 54  |                | 1199.6850 | 1 | 8.2  | 160 | 171 | No  |
|    |                                       |        |                                                                                 | DAGTIAGLNVL             | K | I | 95.00% | 105 |                | 600.3444  | 2 | 4.9  | 160 | 171 | No  |
|    |                                       |        |                                                                                 | EIAEAYLGK               | K | T | 95.00% | 38  |                | 993.5342  | 1 | 8.4  | 129 | 137 | No  |
|    |                                       |        |                                                                                 | EIAEAYLGK               | K | T | 95.00% | 33  |                | 497.2662  | 2 | -1.2 | 129 | 137 | No  |
|    |                                       |        |                                                                                 | FDDAVVQSDMK             | R | H | 95.00% | 48  | M10: Oxidation | 635.7892  | 2 | 6.3  | 78  | 88  | No  |
|    |                                       |        |                                                                                 | FEELNADLFR              | R | G | 95.00% | 69  |                | 627.3177  | 2 | 8.7  | 302 | 311 | Yes |
|    |                                       |        |                                                                                 | IINEPTAAAIAYGLDK        | R | K | 95.00% | 122 |                | 830.4572  | 2 | 6.3  | 172 | 187 | Yes |
|    |                                       |        |                                                                                 | IINEPTAAAIAYGLDK        | R | K | 95.00% | 68  |                | 553.9742  | 3 | 6.5  | 172 | 187 | Yes |
|    |                                       |        |                                                                                 | IINEPTAAAIAYGLDKK       | R | V | 95.00% | 112 |                | 894.5021  | 2 | 2.9  | 172 | 188 | No  |
|    |                                       |        |                                                                                 | IINEPTAAAIAYGLDKK       | R | V | 95.00% | 55  |                | 596.6706  | 3 | 2.9  | 172 | 188 | No  |
|    |                                       |        |                                                                                 | LDKSIQHIDIVLVGGSTR      | K | I | 95.00% | 77  |                | 919.5145  | 2 | 4.1  | 326 | 342 | No  |
|    |                                       |        |                                                                                 | LDKSIQHIDIVLVGGSTR      | K | I | 95.00% | 65  |                | 613.3461  | 3 | 4.8  | 326 | 342 | No  |
|    |                                       |        |                                                                                 | LDKSIQHIDIVLVGGSTR      | K | I | 95.00% | 28  |                | 460.2613  | 4 | 4.3  | 326 | 342 | No  |
|    |                                       |        |                                                                                 | LLQDFFNGK               | K | E | 95.00% | 49  |                | 1081.5780 | 1 | 8.5  | 349 | 357 | Yes |
|    |                                       |        |                                                                                 | LLQDFFNGK               | K | E | 95.00% | 68  |                | 541.2897  | 2 | 2.9  | 349 | 357 | Yes |
|    |                                       |        |                                                                                 | LYQSAGGMPGGMPGGFPGGGA   |   |   |        |     | M8: Oxidation, |           |   |      |     |     |     |
|    |                                       |        |                                                                                 | PPSGGASSGPTIEVD         | K | - | 95.00% | 61  | M12: Oxidation | 1126.8420 | 3 | 6.3  | 610 | 646 | No  |
|    |                                       |        |                                                                                 | MKEIAEAYLGK             | K | T | 95.00% | 66  | M1: Oxidation  | 634.8339  | 2 | 3.1  | 127 | 137 | No  |
|    |                                       |        |                                                                                 | MKEIAEAYLGK             | K | T | 95.00% | 32  | M1: Oxidation  | 423.5583  | 3 | 2.6  | 127 | 137 | No  |
|    |                                       |        |                                                                                 | MKEIAEAYLGK             | K | T | 95.00% | 51  |                | 626.8364  | 2 | 3.0  | 127 | 137 | No  |
|    |                                       |        |                                                                                 | MVNHFAIEFK              | R | R | 95.00% | 41  | M1: Oxidation  | 626.3170  | 2 | 5.2  | 237 | 246 | No  |
|    |                                       |        |                                                                                 | MVNHFAIEFK              | R | R | 95.00% | 57  |                | 618.3194  | 2 | 5.0  | 237 | 246 | No  |
|    |                                       |        |                                                                                 | NQTAEKEEFHQK            | K | E | 95.00% | 37  |                | 582.6132  | 3 | 8.3  | 584 | 597 | No  |
|    |                                       |        |                                                                                 | NQVAMNPTNTVFDK          | K | R | 95.00% | 118 | M5: Oxidation  | 833.3993  | 2 | 0.1  | 57  | 71  | No  |
|    |                                       |        |                                                                                 | NSLESYAFNMK             | K | A | 95.00% | 73  | M10: Oxidation | 660.3025  | 2 | 2.3  | 540 | 550 | No  |
|    |                                       |        |                                                                                 | NSLESYAFNMK             | K | A | 95.00% | 49  |                | 652.3066  | 2 | 4.7  | 540 | 550 | No  |
|    |                                       |        |                                                                                 | QTQTFTTYSNQPGLVQVYEG    |   |   |        |     |                |           |   |      |     |     |     |
|    |                                       |        |                                                                                 | ER                      | K | A | 95.00% | 78  |                | 925.4553  | 3 | 8.3  | 424 | 447 | No  |
|    |                                       |        |                                                                                 | RFDDAVVQSDMK            | R | H | 95.00% | 59  | M11: Oxidation | 713.8381  | 2 | 3.2  | 77  | 88  | No  |
|    |                                       |        |                                                                                 | RFDDAVVQSDMK            | R | H | 95.00% | 39  | M11: Oxidation | 476.2284  | 3 | 4.1  | 77  | 88  | No  |
|    |                                       |        |                                                                                 | SFYPEEVSSMVLTK          | K | M | 95.00% | 108 | M10: Oxidation | 816.9008  | 2 | 6.5  | 113 | 126 | No  |
|    |                                       |        |                                                                                 | SFYPEEVSSMVLTK          | K | M | 95.00% | 39  | M10: Oxidation | 544.9362  | 3 | 6.0  | 113 | 126 | No  |
|    |                                       |        |                                                                                 | SINPDEAVAYGAAVQAAILSGDK | K | S | 95.00% | 132 |                | 1130.5860 | 2 | 7.9  | 362 | 384 | No  |
|    |                                       |        |                                                                                 | SINPDEAVAYGAAVQAAILSGDK | K | S | 95.00% | 82  |                | 754.0588  | 3 | 6.5  | 362 | 384 | No  |
|    |                                       |        |                                                                                 | SQIHIDIVLVGGSTR         | K | I | 95.00% | 98  |                | 741.4109  | 2 | 4.2  | 329 | 342 | No  |
|    |                                       |        |                                                                                 | SQIHIDIVLVGGSTR         | K | I | 95.00% | 40  |                | 494.6086  | 3 | 1.5  | 329 | 342 | No  |
|    |                                       |        |                                                                                 | STAGDTHLGGEDFDNR        | K | M | 95.00% | 77  |                | 846.3690  | 2 | 2.2  | 221 | 236 | Yes |
|    |                                       |        |                                                                                 | STAGDTHLGGEDFDNR        | K | M | 95.00% | 48  |                | 564.5830  | 3 | 4.2  | 221 | 236 | Yes |
|    |                                       |        |                                                                                 | TTPSYAFDTER             | R | L | 95.00% | 100 |                | 744.3601  | 2 | 7.1  | 37  | 49  | Yes |
|    |                                       |        |                                                                                 | TVTNNAVTVPAYFNDSQR      | K | Q | 95.00% | 73  |                | 991.5108  | 2 | 7.9  | 138 | 155 | No  |
|    |                                       |        |                                                                                 | TVTNNAVTVPAYFNDSQR      | K | Q | 95.00% | 65  |                | 661.3413  | 3 | 5.1  | 138 | 155 | No  |
|    |                                       |        |                                                                                 | VEIANDQGNR              | K | T | 95.00% | 52  |                | 1228.6370 | 1 | 7.0  | 26  | 36  | Yes |
|    |                                       |        |                                                                                 | VEIANDQGNR              | K | T | 95.00% | 81  |                | 614.8218  | 2 | 5.9  | 26  | 36  | Yes |
|    |                                       |        | HYDROXYACYL GLUTATHIONE HYDROLASE ISOFORM 1.; HYDROXYACYLGLUTATHIONE HYDROLASE. | ALLEVLGR                | K | L | 95.00% | 33  |                | 435.7768  | 2 | 5.1  | 203 | 210 | No  |
| 26 | IPI00003933; IPI00745553              | HAGH   |                                                                                 | EAIVDPVQPQK             | K | V | 95.00% | 75  |                | 647.8584  | 2 | 6.2  | 72  | 83  | No  |
|    |                                       |        |                                                                                 | EKTVQQHAGETDPVTTMR      | R | A | 95.00% | 50  | M17: Oxidation | 682.0040  | 3 | 9.3  | 277 | 294 | No  |
|    |                                       |        |                                                                                 | ITHLSTLQVGLNVK          | K | C | 95.00% | 93  |                | 805.4750  | 2 | 8.9  | 137 | 151 | No  |
|    |                                       |        |                                                                                 | ITHLSTLQVGLNVK          | K | C | 95.00% | 35  |                | 537.3192  | 3 | 8.8  | 137 | 151 | No  |
|    |                                       |        |                                                                                 | TVQQHAGETDPVTTMR        | K | A | 95.00% | 58  | M15: Oxidation | 893.9311  | 2 | 8.3  | 279 | 294 | No  |
|    |                                       |        |                                                                                 | TVQQHAGETDPVTTMR        | K | A | 95.00% | 42  | M15: Oxidation | 596.2883  | 3 | 5.5  | 279 | 294 | No  |



|    |                          |       |  |                                                                                                                                      |   |   |        |     |                              |           |   |      |     |     |    |
|----|--------------------------|-------|--|--------------------------------------------------------------------------------------------------------------------------------------|---|---|--------|-----|------------------------------|-----------|---|------|-----|-----|----|
|    |                          |       |  | VLQGMVDDGSDDRPAGTR                                                                                                                   | R | S | 95.00% | 73  | M5: Oxidation                | 952.9459  | 2 | 3.3  | 255 | 272 | No |
|    |                          |       |  | VLQGMVDDGSDDRPAGTR                                                                                                                   | R | S | 95.00% | 74  | M5: Oxidation                | 635.6345  | 3 | 5.4  | 255 | 272 | No |
|    |                          |       |  | VLQGMVDDGSDDRPAGTR                                                                                                                   | R | S | 95.00% | 63  |                              | 944.9504  | 2 | 5.4  | 255 | 272 | No |
|    |                          |       |  | VLQGMVDDGSDDRPAGTR                                                                                                                   | R | S | 95.00% | 59  |                              | 630.3015  | 3 | 3.3  | 255 | 272 | No |
|    |                          |       |  | ISOFORM COMPLEXED OF ARGINYL-TRNA SYNTHETASE, CYTOPLASMIC.; ISOFORM MONOMERIC OF ARGINYL-TRNA SYNTHETASE, CYTOPLASMIC.               |   |   |        |     |                              |           |   |      |     |     |    |
| 31 | IPI00004860; IPI00759723 | RARS  |  | IYDALDVSLIER                                                                                                                         | K | G | 95.00% | 82  |                              | 703.8864  | 2 | 8.2  | 322 | 333 | No |
|    |                          |       |  | VEIAGPGFINVHLR                                                                                                                       | K | K | 95.00% | 33  |                              | 507.9596  | 3 | 5.9  | 154 | 167 | No |
|    |                          |       |  | ISOFORM 1 OF ELECTRON TRANSFER FLAVOPROTEIN SUBUNIT BETA.; ISOFORM 2 OF ELECTRON TRANSFER FLAVOPROTEIN SUBUNIT BETA.                 |   |   |        |     |                              |           |   |      |     |     |    |
| 32 | IPI00004902; IPI00556451 | ETFB  |  | EIDGGLETLR                                                                                                                           | R | L | 95.00% | 33  |                              | 551.7964  | 2 | 9.3  | 165 | 174 | No |
|    |                          |       |  | GIHVEVPPAEAEER                                                                                                                       | R | L | 95.00% | 43  |                              | 702.3734  | 2 | 7.5  | 86  | 98  | No |
|    |                          |       |  | GIHVEVPPAEAEER                                                                                                                       | R | L | 95.00% | 42  |                              | 468.5836  | 3 | 4.7  | 86  | 98  | No |
|    |                          |       |  | IEVIKPGDLGVDLTSK                                                                                                                     | K | L | 95.00% | 43  |                              | 561.9945  | 3 | 8.5  | 206 | 221 | No |
|    |                          |       |  | LGPLQVAR                                                                                                                             | R | V | 95.00% | 42  |                              | 427.2685  | 2 | 3.6  | 99  | 106 | No |
|    |                          |       |  | LKLPVAVTADLR                                                                                                                         | R | L | 95.00% | 52  |                              | 648.4110  | 2 | 6.9  | 175 | 186 | No |
|    |                          |       |  | LKLPVAVTADLR                                                                                                                         | R | L | 95.00% | 40  |                              | 432.6097  | 3 | 6.4  | 175 | 186 | No |
|    |                          |       |  | LPVAVTADLR                                                                                                                           | K | L | 95.00% | 38  |                              | 527.8155  | 2 | -2.9 | 177 | 186 | No |
|    |                          |       |  | LSVISVEDPPQR                                                                                                                         | K | T | 95.00% | 37  |                              | 670.3710  | 2 | 8.8  | 222 | 233 | No |
|    |                          |       |  | TAGVKVETTEDLVAK                                                                                                                      | R | L | 95.00% | 58  |                              | 780.9316  | 2 | 4.3  | 234 | 248 | No |
|    |                          |       |  | VDLVLLGK                                                                                                                             | K | Q | 95.00% | 37  |                              | 428.7810  | 2 | 3.8  | 117 | 124 | No |
|    |                          |       |  | VETTEDLVAK                                                                                                                           | K | L | 95.00% | 31  |                              | 552.7960  | 2 | 4.6  | 239 | 248 | No |
|    |                          |       |  | MEDIUM-CHAIN SPECIFIC ACYL-COA DEHYDROGENASE, MITOCHONDRIAL PRECURSOR.; HYPOTHETICAL PROTEIN DKFZP686M24262.                         |   |   |        |     |                              |           |   |      |     |     |    |
| 33 | IPI00005040; IPI00513827 | ACADM |  | AFAGDIANQLATDAVQILGGNGF                                                                                                              | K | L | 95.00% | 46  |                              | 1075.2130 | 3 | 9.6  | 359 | 389 | No |
|    |                          |       |  | NTEYPVEK                                                                                                                             | K | L | 95.00% | 43  |                              | 806.6610  | 4 | 9.1  | 359 | 389 | No |
|    |                          |       |  | AFAGDIANQLATDAVQILGGNGF                                                                                                              | K | K | 95.00% | 114 |                              | 946.5075  | 2 | 7.9  | 218 | 235 | No |
|    |                          |       |  | NTEYPVEK                                                                                                                             | K | L | 95.00% | 70  |                              | 631.3387  | 3 | 4.4  | 218 | 235 | No |
|    |                          |       |  | AFTGFIVEADTPGIQIGR                                                                                                                   | K | K | 95.00% | 68  |                              | 577.3157  | 2 | 6.7  | 198 | 206 | No |
|    |                          |       |  | ANWYFLLAR                                                                                                                            | K | S | 95.00% | 57  |                              | 688.8541  | 2 | 3.9  | 58  | 69  | No |
|    |                          |       |  | EEIIPVAAEYDK                                                                                                                         | R | R | 95.00% | 60  |                              | 834.7807  | 3 | 5.3  | 58  | 79  | No |
|    |                          |       |  | EEIIPVAAEYDKTGEYVPLIR                                                                                                                | R | R | 95.00% | 60  |                              | 834.7807  | 3 | 5.3  | 58  | 79  | No |
|    |                          |       |  | ENVLIGDGAGFK                                                                                                                         | K | V | 95.00% | 49  |                              | 610.3227  | 2 | 4.2  | 260 | 271 | No |
|    |                          |       |  | GIVFEDVKVPK                                                                                                                          | R | E | 95.00% | 65  |                              | 615.8628  | 2 | 6.4  | 249 | 259 | No |
|    |                          |       |  | GIVFEDVKVPK                                                                                                                          | R | E | 95.00% | 30  |                              | 410.9098  | 3 | 3.0  | 249 | 259 | No |
|    |                          |       |  | IYQIYEGTSQIQR                                                                                                                        | K | L | 95.00% | 100 |                              | 799.9183  | 2 | 6.8  | 396 | 408 | No |
|    |                          |       |  | IYQIYEGTSQIQR                                                                                                                        | K | L | 95.00% | 63  |                              | 533.6135  | 3 | 4.2  | 396 | 408 | No |
|    |                          |       |  | QREPLGFSFEFTEQQK                                                                                                                     | R | E | 95.00% | 46  |                              | 676.6697  | 3 | 5.2  | 30  | 46  | No |
|    |                          |       |  | TGEYVPLIR                                                                                                                            | K | R | 95.00% | 42  |                              | 572.8240  | 2 | 2.9  | 70  | 79  | No |
|    |                          |       |  | TRPVVAAGAVGLAQR                                                                                                                      | K | A | 95.00% | 64  |                              | 733.4404  | 2 | 8.7  | 280 | 294 | No |
|    |                          |       |  | TRPVVAAGAVGLAQR                                                                                                                      | K | A | 95.00% | 40  |                              | 489.2924  | 3 | 0.7  | 280 | 294 | No |
|    |                          |       |  | VAMGAFDK                                                                                                                             | K | T | 95.00% | 36  | M3: Oxidation                | 427.7100  | 2 | 4.6  | 272 | 279 | No |
|    |                          |       |  | LON PROTEASE HOMOLOG, MITOCHONDRIAL PRECURSOR.; CDNA FLJ39307 FIS, CLONE OCBBF2013208, HIGHLY SIMILAR TO MITOCHONDRIAL LON PROTEASE. |   |   |        |     |                              |           |   |      |     |     |    |
| 34 | IPI00005158; IPI00334291 | LONP1 |  | DIIALNPLYR                                                                                                                           | R | E | 95.00% | 45  |                              | 594.3467  | 2 | 5.6  | 239 | 248 | No |
|    |                          |       |  | ELGLEKDDKDAIEEK                                                                                                                      | K | F | 95.00% | 53  |                              | 866.4290  | 2 | -8.9 | 343 | 357 | No |
|    |                          |       |  | FSVGGMTDVAEIK                                                                                                                        | R | G | 95.00% | 64  | M6: Oxidation                | 685.3388  | 2 | 1.7  | 547 | 559 | No |
|    |                          |       |  | HVMDVDEELSK                                                                                                                          | K | L | 95.00% | 67  | M3: Oxidation                | 708.8423  | 2 | 6.0  | 433 | 444 | No |
|    |                          |       |  | ILEFIAVSQLR                                                                                                                          | R | G | 95.00% | 68  |                              | 644.8915  | 2 | 9.4  | 438 | 448 | No |
|    |                          |       |  | LGLLDNHSSEFNVTR                                                                                                                      | K | N | 95.00% | 55  |                              | 851.4385  | 2 | 7.8  | 382 | 396 | No |
|    |                          |       |  | LGLLDNHSSEFNVTR                                                                                                                      | K | N | 95.00% | 49  |                              | 567.9595  | 3 | 4.0  | 445 | 459 | No |
|    |                          |       |  | LKELVVPK                                                                                                                             | R | H | 95.00% | 35  |                              | 463.3107  | 2 | 5.1  | 362 | 369 | No |
|    |                          |       |  | LSSDVLTLIK                                                                                                                           | K | Q | 95.00% | 88  |                              | 601.3763  | 2 | 3.3  | 691 | 701 | No |
|    |                          |       |  | MEMINVSQYVAQEK                                                                                                                       | R | L | 95.00% | 68  | M1: Oxidation, M3: Oxidation | 815.8840  | 2 | 8.9  | 590 | 603 | No |
|    |                          |       |  | QNLAMTGEVSLTGK                                                                                                                       | R | I | 95.00% | 57  | M5: Oxidation                | 732.8784  | 2 | 8.1  | 875 | 888 | No |
|    |                          |       |  | TENPLILIDEVDK                                                                                                                        | K | I | 95.00% | 68  |                              | 749.9109  | 2 | 8.8  | 582 | 594 | No |
|    |                          |       |  | TENPLILIDEVDKIGR                                                                                                                     | K | G | 95.00% | 69  |                              | 913.0115  | 2 | 4.2  | 582 | 597 | No |
|    |                          |       |  | TENPLILIDEVDKIGR                                                                                                                     | K | G | 95.00% | 48  |                              | 609.0118  | 3 | 6.8  | 582 | 597 | No |
|    |                          |       |  | TKTENPLILIDEVDKIGR                                                                                                                   | K | G | 95.00% | 37  |                              | 685.3940  | 3 | 8.1  | 580 | 597 | No |
|    |                          |       |  | YSNENLDLAR                                                                                                                           | K | A | 95.00% | 45  |                              | 597.7964  | 2 | 7.9  | 410 | 419 | No |

|    |                                                                                                             |                                                 |                                                                                                                                                                                                                                                                                                                                                                                                                                                                                                        |                                                                                                                                                                                                                                                                     |                                                                                   |                                                                    |                                                                                                                                                              |                                                                                         |                                                                                    |                                                                                                                                                                                   |                                                                         |                                                                                                       |                                                                                                                    |                                                                                                                    |                                                                                              |  |  |  |  |
|----|-------------------------------------------------------------------------------------------------------------|-------------------------------------------------|--------------------------------------------------------------------------------------------------------------------------------------------------------------------------------------------------------------------------------------------------------------------------------------------------------------------------------------------------------------------------------------------------------------------------------------------------------------------------------------------------------|---------------------------------------------------------------------------------------------------------------------------------------------------------------------------------------------------------------------------------------------------------------------|-----------------------------------------------------------------------------------|--------------------------------------------------------------------|--------------------------------------------------------------------------------------------------------------------------------------------------------------|-----------------------------------------------------------------------------------------|------------------------------------------------------------------------------------|-----------------------------------------------------------------------------------------------------------------------------------------------------------------------------------|-------------------------------------------------------------------------|-------------------------------------------------------------------------------------------------------|--------------------------------------------------------------------------------------------------------------------|--------------------------------------------------------------------------------------------------------------------|----------------------------------------------------------------------------------------------|--|--|--|--|
|    |                                                                                                             |                                                 | ALDO-KETO REDUCTASE FAMILY 1 MEMBER C2.;<br>ALDO-KETO REDUCTASE FAMILY 1 MEMBER C1.;<br>ALDO-KETO REDUCTASE FAMILY 1 MEMBER C4.;<br>ALDO-KETO REDUCTASE FAMILY 1 MEMBER C3.;<br>DIHYDRODIOL DEHYDROGENASE DD1<br>(FRAGMENT).; DIHYDRODIOL DEHYDROGENASE<br>DD2.; ALDO-KETO REDUCTASE FAMILY 1,<br>MEMBER C1.; SIMILAR TO ALDO-KETO<br>REDUCTASE FAMILY 1 MEMBER C1 (20-ALPHA-<br>HYDROXYSTEROID DEHYDROGENASE) (20-<br>ALPHA-HSD) (TRANS-1,2-DIHYDROBENZENE-1,2-<br>DIOL DEHYDROGENASE) (HIGH-AFFINITY |                                                                                                                                                                                                                                                                     |                                                                                   |                                                                    |                                                                                                                                                              |                                                                                         |                                                                                    |                                                                                                                                                                                   |                                                                         |                                                                                                       |                                                                                                                    |                                                                                                                    |                                                                                              |  |  |  |  |
| 35 | IPI0005668; IPI00029733; IPI00289524;<br>IPI00291483; IPI00394704; IPI00455167;<br>IPI00514814; IPI00736657 | AKR1C1; AKR1C2;<br>AKR1C3; AKR1C4;<br>LOC648517 | HEPATIC BILEACID-BINDING PROTEIN (HBAB)<br>(CHLORDECONE REDUCTASE HOMOLOG<br>HAKRC...ISOFORM 1.                                                                                                                                                                                                                                                                                                                                                                                                        | LLEMILNKPLGK<br>LLEMILNKPLGK                                                                                                                                                                                                                                        | R<br>R                                                                            | Y<br>Y                                                             | 95.00%<br>95.00%                                                                                                                                             | 37<br>33                                                                                | M4: Oxidation<br>M4: Oxidation                                                     | 692.9191<br>462.2837                                                                                                                                                              | 2<br>3                                                                  | 4.5<br>8.1                                                                                            | 172<br>172                                                                                                         | 183<br>183                                                                                                         | No<br>No                                                                                     |  |  |  |  |
|    |                                                                                                             |                                                 |                                                                                                                                                                                                                                                                                                                                                                                                                                                                                                        | LNDGHFMPVLGFGTYAPAEVPK<br>REDIFYTSK<br>TPALIALR                                                                                                                                                                                                                     | K<br>K<br>R                                                                       | S<br>L<br>Y                                                        | 95.00%<br>95.00%<br>95.00%                                                                                                                                   | 52<br>43<br>60                                                                          | M7: Oxidation                                                                      | 792.7331<br>579.7971<br>427.7782                                                                                                                                                  | 3<br>2<br>2                                                             | 5.8<br>5.9<br>2.5                                                                                     | 10<br>76<br>251                                                                                                    | 31<br>84<br>258                                                                                                    | No<br>No<br>No                                                                               |  |  |  |  |
| 36 | IPI00005957                                                                                                 | SMPX                                            | SMALL MUSCLE PROTEIN, X-LINKED.                                                                                                                                                                                                                                                                                                                                                                                                                                                                        | AIQANINIPMGAFRPGAGQPPR<br>KLPGPAVNLSEIQNIK                                                                                                                                                                                                                          | R<br>K                                                                            | R<br>S                                                             | 95.00%<br>95.00%                                                                                                                                             | 57<br>49                                                                                | M10: Oxidation                                                                     | 764.7466<br>574.3426                                                                                                                                                              | 3<br>3                                                                  | 9.1<br>9.2                                                                                            | 13<br>62                                                                                                           | 34<br>77                                                                                                           | No<br>No                                                                                     |  |  |  |  |
| 37 | IPI00006091; IPI00304639; IPI00375141;<br>IPI00472316                                                       | DMD                                             | ISOFORM 4 OF DYSTROPHIN.; ISOFORM 3 OF<br>DYSTROPHIN.; DYSTROPHIN DP427L ISOFORM.;<br>DYSTROPHIN DP427P1 ISOFORM.                                                                                                                                                                                                                                                                                                                                                                                      | AKQPDPLAPLTTIGASPTQTVTL<br>VTQPVVTK<br>EEAEQVLGQAR<br>EGPYTVDAIQK<br>ELEGFNSDIQK<br>LLEQSIQSAQETEK<br>LLQQFPLDLEK<br>LLVEELPLR<br>LLOELQATDELDLK<br>NILSEFQR<br>NIMAGLQQTNSEK<br>RPQLEELITAAQNLIK<br>TLNATGEEIIQQSSK<br>VGNILQLGSK<br>VLSQIDVAQK<br>VMVGDLEDINEMIIK | R<br>K<br>K<br>K<br>K<br>R<br>K<br>R<br>K<br>K<br>R<br>R<br>R<br>R<br>R<br>R<br>R | E<br>A<br>K<br>L<br>S<br>F<br>Q<br>L<br>D<br>I<br>N<br>T<br>L<br>K | 95.00%<br>95.00%<br>95.00%<br>95.00%<br>95.00%<br>95.00%<br>95.00%<br>95.00%<br>95.00%<br>95.00%<br>95.00%<br>95.00%<br>95.00%<br>95.00%<br>95.00%<br>95.00% | 76<br>55<br>31<br>42<br>103<br>29<br>64<br>90<br>37<br>80<br>34<br>95<br>40<br>67<br>30 | M3: Oxidation<br>M2: Oxidation,<br>M12: Oxidation                                  | 1044.9300<br>615.3122<br>610.8154<br>675.8360<br>802.4192<br>672.3892<br>541.3390<br>822.9285<br>503.7730<br>725.3581<br>575.3316<br>809.9248<br>514.8099<br>550.8223<br>875.9424 | 3<br>2<br>2<br>2<br>2<br>2<br>2<br>2<br>2<br>3<br>2<br>2<br>2<br>2<br>2 | 7.4<br>3.2<br>5.3<br>7.3<br>7.8<br>9.4<br>7.3<br>9.4<br>6.0<br>5.3<br>4.8<br>7.9<br>1.3<br>4.5<br>9.2 | 2422<br>2590<br>2608<br>1782<br>1364<br>2690<br>2255<br>2936<br>2211<br>126<br>2524<br>2161<br>396<br>1440<br>2498 | 2452<br>2600<br>2618<br>1792<br>1377<br>2700<br>2263<br>2949<br>2218<br>138<br>2538<br>2175<br>405<br>1449<br>2512 | No<br>No<br>No<br>No<br>No<br>No<br>No<br>No<br>No<br>No<br>No<br>No<br>No<br>No<br>No<br>No |  |  |  |  |
| 38 | IPI00006211                                                                                                 | VAPB                                            | ISOFORM 1 OF VESICLE-ASSOCIATED<br>MEMBRANE PROTEIN-ASSOCIATED PROTEINB/C.                                                                                                                                                                                                                                                                                                                                                                                                                             | FRGPFDDVVTNLK<br>GPFTDVVTNLK<br>TVQSNPISALAPTGK<br>VEQVLSLEPQHELK                                                                                                                                                                                                   | K<br>R<br>K<br>K                                                                  | L<br>L<br>E<br>F                                                   | 95.00%<br>95.00%<br>95.00%<br>95.00%                                                                                                                         | 61<br>83<br>61<br>38                                                                    |                                                                                    | 797.9407<br>646.3526<br>785.9321<br>550.3066                                                                                                                                      | 2<br>2<br>2<br>3                                                        | 8.8<br>5.7<br>7.8<br>7.9                                                                              | 18<br>20<br>201<br>4                                                                                               | 31<br>31<br>216<br>17                                                                                              | No<br>No<br>No<br>No                                                                         |  |  |  |  |
| 39 | IPI00006579                                                                                                 | COX411                                          | CYTOCHROME C OXIDASE SUBUNIT 4 ISOFORM<br>1, MITOCHONDRIAL PRECURSOR.                                                                                                                                                                                                                                                                                                                                                                                                                                  | ASWSSLSMDEK<br>ASWSSLSMDEK<br>ASWSSLSMDEKVELYR<br>DHPLPEVAHVK<br>DHPLPEVAHVK<br>ESFAEMNR<br>FKESFAEMNR<br>HYVYGPLPQSFDK<br>HYVYGPLPQSFDKEWVAK<br>RDHPLPEVAHVK<br>SEDFSLPAYMDR<br>SEDFSLPAYMDR<br>VNPIQLGASK                                                         | K<br>K<br>K<br>R<br>R<br>K<br>K<br>K<br>K<br>R<br>K<br>K<br>K                     | V<br>V<br>I<br>H<br>H<br>G<br>G<br>E<br>Q<br>H<br>R<br>R<br>W      | 95.00%<br>95.00%<br>95.00%<br>95.00%<br>95.00%<br>95.00%<br>95.00%<br>95.00%<br>95.00%<br>95.00%<br>95.00%<br>95.00%<br>95.00%                               | 39<br>69<br>36<br>51<br>53<br>36<br>40<br>31<br>51<br>54<br>89<br>95<br>67              | M8: Oxidation<br>M8: Oxidation<br>M6: Oxidation<br>M8: Oxidation<br>M10: Oxidation | 628.7833<br>620.7830<br>639.6445<br>621.3398<br>414.5619<br>500.2191<br>637.7996<br>775.8921<br>722.0394<br>699.3906<br>723.8199<br>715.8189<br>513.8034                          | 2<br>2<br>3<br>3<br>3<br>2<br>2<br>2<br>3<br>2<br>2<br>2<br>2           | 9.6<br>5.1<br>6.2<br>6.0<br>4.6<br>9.8<br>5.8<br>7.7<br>7.3<br>5.6<br>7.6<br>2.6<br>4.0               | 68<br>68<br>68<br>43<br>43<br>88<br>86<br>123<br>123<br>42<br>30<br>30<br>150                                      | 78<br>78<br>83<br>53<br>53<br>95<br>95<br>135<br>140<br>53<br>41<br>41<br>159                                      | No<br>No<br>No<br>No<br>No<br>No<br>No<br>No<br>No<br>No<br>No<br>No<br>No                   |  |  |  |  |
| 40 | IPI00006663; IPI00792207                                                                                    | ALDH2                                           | ALDEHYDE DEHYDROGENASE, MITOCHONDRIAL<br>PRECURSOR.; MITOCHONDRIAL ALDEHYDE<br>DEHYDROGENASE 2 VARIANT (FRAGMENT).                                                                                                                                                                                                                                                                                                                                                                                     | ANNSTYGLAAAVFTK<br>EEIFGPMQILK<br>ELGEYGLQAYTEVK<br>LGPALATGNVVVMK                                                                                                                                                                                                  | R<br>K<br>R<br>K                                                                  | D<br>F<br>T<br>V                                                   | 95.00%<br>95.00%<br>95.00%<br>95.00%                                                                                                                         | 116<br>41<br>91<br>78                                                                   | M8: Oxidation<br>M13: Oxidation                                                    | 764.4007<br>710.3872<br>800.4062<br>693.3989                                                                                                                                      | 2<br>2<br>2<br>2                                                        | 8.5<br>7.5<br>8.7<br>5.1                                                                              | 437<br>415<br>493<br>196                                                                                           | 451<br>426<br>506<br>209                                                                                           | No<br>No<br>No<br>No                                                                         |  |  |  |  |

|    |                          |                |                                                                                                                                    |                        |   |   |        |     |           |   |      |     |     |     |
|----|--------------------------|----------------|------------------------------------------------------------------------------------------------------------------------------------|------------------------|---|---|--------|-----|-----------|---|------|-----|-----|-----|
|    |                          |                |                                                                                                                                    | TEQGPQVDETQFK          | K | K | 95.00% | 81  | 753.8607  | 2 | 3.8  | 356 | 368 | No  |
|    |                          |                |                                                                                                                                    | TFVQEDIYDEFVER         | R | S | 95.00% | 96  | 895.4269  | 2 | 9.8  | 325 | 338 | No  |
|    |                          |                |                                                                                                                                    | TFVQEDIYDEFVER         | R | S | 95.00% | 45  | 597.2854  | 3 | 6.8  | 325 | 338 | No  |
|    |                          |                |                                                                                                                                    | TIPIDGFFSYTR           | K | H | 95.00% | 63  | 766.3818  | 2 | 8.0  | 160 | 172 | No  |
|    |                          |                |                                                                                                                                    | TVTVK                  | K | V | 95.00% | 29  | 547.3508  | 1 | 9.6  | 507 | 511 | No  |
|    |                          |                |                                                                                                                                    | VAEQTPLTALYVANLIK      | K | E | 95.00% | 89  | 922.5360  | 2 | 5.8  | 210 | 226 | No  |
|    |                          |                |                                                                                                                                    | VAEQTPLTALYVANLIK      | K | E | 95.00% | 47  | 615.3605  | 3 | 6.8  | 210 | 226 | No  |
|    |                          |                |                                                                                                                                    | VAFTGSTEIGR            | K | V | 95.00% | 56  | 569.2983  | 2 | -1.4 | 258 | 268 | No  |
|    |                          |                |                                                                                                                                    | VIQVAAGSSNLK           | R | R | 95.00% | 62  | 593.8466  | 2 | 4.8  | 269 | 280 | No  |
|    |                          |                |                                                                                                                                    | VIQVAAGSSNLKR          | R | V | 95.00% | 47  | 671.9005  | 2 | 9.4  | 269 | 281 | No  |
|    |                          |                |                                                                                                                                    | VVGNPFDSK              | R | T | 95.00% | 29  | 481.7527  | 2 | 3.0  | 347 | 355 | No  |
| 41 | IPI00007052              | FIS1           | MITOCHONDRIAL FISSION 1 PROTEIN.                                                                                                   | GIVLLELLPK             | K | G | 95.00% | 70  | 612.3880  | 2 | 5.2  | 54  | 64  | No  |
|    |                          |                |                                                                                                                                    | GLLQTEPQNNQAK          | R | E | 95.00% | 72  | 720.8804  | 2 | 5.7  | 96  | 108 | No  |
| 42 | IPI00007402; IPI00784008 | IPO7           | 120 KDA PROTEIN.; IMPORTIN-7.                                                                                                      | AFAVGQVQLLK            | K | V | 95.00% | 83  | 636.8916  | 2 | 5.8  | 297 | 308 | No  |
|    |                          |                |                                                                                                                                    | AIFQTIQNR              | K | N | 95.00% | 35  | 545.8077  | 2 | 6.0  | 966 | 974 | No  |
|    |                          |                |                                                                                                                                    | ENIVEAIHSPELIR         | R | V | 95.00% | 52  | 578.3284  | 3 | 5.5  | 95  | 109 | No  |
|    |                          |                |                                                                                                                                    | EYNEFAEVFLK            | K | A | 95.00% | 48  | 694.8472  | 2 | 9.1  | 286 | 296 | No  |
|    |                          |                |                                                                                                                                    | FIQLLSDQSDQSVLIQK      | R | Q | 95.00% | 40  | 981.5355  | 2 | 4.2  | 187 | 203 | No  |
|    |                          |                |                                                                                                                                    | KEVLQK                 | R | T | 95.00% | 31  | 744.4678  | 1 | 7.7  | 407 | 412 | No  |
| 43 | IPI00007611              | ATP5O          | ATP SYNTHASE O SUBUNIT, MITOCHONDRIAL PRECURSOR.                                                                                   | FSPLTTNLINLLAENGR      | R | L | 95.00% | 104 | 937.0219  | 2 | 9.3  | 101 | 117 | No  |
|    |                          |                |                                                                                                                                    | FSPLTTNLINLLAENGR      | R | L | 95.00% | 69  | 625.0157  | 3 | 6.8  | 101 | 117 | No  |
|    |                          |                |                                                                                                                                    | LSNTQGVVSAFSTMMSVHR    | R | G | 95.00% | 69  | 1042.5070 | 2 | 7.4  | 118 | 136 | No  |
|    |                          |                |                                                                                                                                    | LSNTQGVVSAFSTMMSVHR    | R | G | 95.00% | 36  | 695.3404  | 3 | 7.4  | 118 | 136 | No  |
|    |                          |                |                                                                                                                                    | LSNTQGVVSAFSTMMSVHR    | R | G | 95.00% | 42  | 684.6764  | 3 | 6.4  | 118 | 136 | No  |
|    |                          |                |                                                                                                                                    | LVRPPVQVYVYIEGR        | K | Y | 95.00% | 43  | 791.9626  | 2 | 6.6  | 27  | 40  | No  |
|    |                          |                |                                                                                                                                    | LVRPPVQVYVYIEGR        | K | Y | 95.00% | 47  | 528.3086  | 3 | 1.9  | 27  | 40  | No  |
|    |                          |                |                                                                                                                                    | SFLSQGGVLK             | K | L | 95.00% | 51  | 553.8165  | 2 | 3.6  | 163 | 172 | No  |
|    |                          |                |                                                                                                                                    | TDPSILGGMIVR           | K | I | 95.00% | 74  | 637.8462  | 2 | 5.3  | 177 | 188 | No  |
|    |                          |                |                                                                                                                                    | TDPSILGGMIVR           | K | I | 95.00% | 33  | 629.8492  | 2 | 5.9  | 177 | 188 | No  |
|    |                          |                |                                                                                                                                    | VAASVLNPNYVK           | K | R | 95.00% | 63  | 580.8416  | 2 | 6.4  | 74  | 84  | No  |
|    |                          |                |                                                                                                                                    | VAQILKEPK              | R | V | 95.00% | 38  | 513.3242  | 2 | 4.4  | 65  | 73  | No  |
|    |                          |                |                                                                                                                                    | YATALYSAASK            | R | Q | 95.00% | 56  | 573.3000  | 2 | 7.0  | 41  | 51  | No  |
|    |                          |                | COILED-COIL-HELIX-COILED-COIL-HELIX DOMAIN-CONTAINING PROTEIN 2.; COILED-COIL-HELIX-COILED-COIL-HELIX DOMAIN-CONTAINING PROTEIN 9. | AAPRPAPVAQPPAAAPPSAVGS | R | Q | 95.00% | 64  | 845.1323  | 3 | 6.8  | 24  | 51  | No  |
| 44 | IPI00007673; IPI00401259 | CHCHD2; CHCHD9 |                                                                                                                                    | SAAAPR                 | R | Q | 95.00% | 64  |           |   |      |     |     |     |
|    |                          |                |                                                                                                                                    | PAPVAQPPAAAPPSAVGS     | R | Q | 95.00% | 64  |           |   |      |     |     |     |
|    |                          |                |                                                                                                                                    | PR                     | R | Q | 95.00% | 36  | 713.3902  | 3 | 8.9  | 28  | 51  | No  |
|    |                          |                |                                                                                                                                    | ARFEELNADLFR           | R | G | 95.00% | 63  | 740.8885  | 2 | 9.6  | 303 | 314 | Yes |
|    |                          |                |                                                                                                                                    | ARFEELNADLFR           | R | G | 95.00% | 51  | 494.2596  | 3 | 5.6  | 303 | 314 | Yes |
|    |                          |                |                                                                                                                                    | DAGTITGLNVLK           | K | I | 95.00% | 65  | 615.3499  | 2 | 5.2  | 161 | 172 | No  |
|    |                          |                |                                                                                                                                    | EIAEAYLGK              | K | V | 95.00% | 34  | 525.7799  | 2 | 4.3  | 130 | 139 | No  |
|    |                          |                |                                                                                                                                    | FDLTGIPPAPR            | K | G | 95.00% | 55  | 592.3301  | 2 | 3.9  | 462 | 472 | No  |
|    |                          |                |                                                                                                                                    | FEELNADLFR             | R | G | 95.00% | 69  | 627.3177  | 2 | 8.7  | 305 | 314 | Yes |
|    |                          |                |                                                                                                                                    | GQIQEIVLVGGSTR         | K | I | 95.00% | 67  | 728.9127  | 2 | 3.4  | 332 | 345 | No  |
|    |                          |                |                                                                                                                                    | IINEPTAAAIAYGLDK       | R | K | 95.00% | 122 | 830.4572  | 2 | 6.3  | 173 | 188 | Yes |
|    |                          |                |                                                                                                                                    | IINEPTAAAIAYGLDK       | R | K | 95.00% | 68  | 553.9742  | 3 | 6.5  | 173 | 188 | Yes |
|    |                          |                |                                                                                                                                    | IINEPTAAAIAYGLDKK      | R | G | 95.00% | 112 | 894.5021  | 2 | 2.9  | 173 | 189 | No  |
|    |                          |                |                                                                                                                                    | IINEPTAAAIAYGLDKK      | R | G | 95.00% | 55  | 596.6706  | 3 | 2.9  | 173 | 189 | No  |
|    |                          |                |                                                                                                                                    | KFEDATVQSDMK           | R | H | 95.00% | 69  | 707.8348  | 2 | 6.6  | 78  | 89  | No  |
|    |                          |                |                                                                                                                                    | LDKGQIQEIVLVGGSTR      | K | I | 95.00% | 92  | 907.0199  | 2 | 7.4  | 329 | 345 | No  |
|    |                          |                |                                                                                                                                    | LDKGQIQEIVLVGGSTR      | K | I | 95.00% | 52  | 605.0132  | 3 | 3.0  | 329 | 345 | No  |
|    |                          |                |                                                                                                                                    | LLQDFNKG               | K | E | 95.00% | 49  | 1081.5780 | 1 | 8.5  | 352 | 360 | Yes |
|    |                          |                |                                                                                                                                    | LLQDFNKG               | K | E | 95.00% | 68  | 541.2897  | 2 | 2.9  | 352 | 360 | Yes |
|    |                          |                |                                                                                                                                    | MKEIAEAYLGK            | K | V | 95.00% | 71  | 663.3439  | 2 | 1.8  | 128 | 139 | No  |
|    |                          |                |                                                                                                                                    | MVSHLAEFFK             | R | R | 95.00% | 30  | 603.7944  | 2 | -1.6 | 240 | 249 | No  |
|    |                          |                |                                                                                                                                    | MVSHLAEFFK             | R | K | 95.00% | 58  | 681.8475  | 2 | 2.3  | 240 | 250 | No  |
|    |                          |                |                                                                                                                                    | MVSHLAEFFK             | R | K | 95.00% | 35  | 454.9012  | 3 | 3.0  | 240 | 250 | No  |
|    |                          |                |                                                                                                                                    | NALESYTYNIK            | K | Q | 95.00% | 78  | 658.3336  | 2 | 4.5  | 543 | 553 | No  |
|    |                          |                |                                                                                                                                    | NQVAMNPTNTIFDAK        | K | R | 95.00% | 108 | 840.4150  | 2 | 9.4  | 58  | 72  | No  |
|    |                          |                |                                                                                                                                    | SINPDEAVYGAAVQAAALIGDK | K | S | 95.00% | 49  | 762.7451  | 3 | 9.4  | 365 | 387 | No  |
|    |                          |                |                                                                                                                                    | STAGDTHLGGEDFDNR       | K | M | 95.00% | 77  | 846.3690  | 2 | 2.2  | 224 | 239 | Yes |
|    |                          |                |                                                                                                                                    | STAGDTHLGGEDFDNR       | K | M | 95.00% | 48  | 564.5830  | 3 | 4.2  | 224 | 239 | Yes |
|    |                          |                |                                                                                                                                    | TFPPEEISSMVLTK         | K | M | 95.00% | 91  | 822.9188  | 2 | 6.2  | 114 | 127 | No  |
|    |                          |                |                                                                                                                                    | TFPPEEISSMVLTK         | K | M | 95.00% | 36  | 548.9471  | 3 | 3.8  | 114 | 127 | No  |
|    |                          |                |                                                                                                                                    | TTPSYVAFDTER           | R | L | 95.00% | 100 | 744.3601  | 2 | 7.1  | 38  | 50  | Yes |

|    |                          |        |                                             |                        |   |   |        |     |                                              |           |   |     |     |     |     |
|----|--------------------------|--------|---------------------------------------------|------------------------|---|---|--------|-----|----------------------------------------------|-----------|---|-----|-----|-----|-----|
|    |                          |        |                                             | VEIANDQGNR             | K | T | 95.00% | 52  |                                              | 1228.6370 | 1 | 7.0 | 27  | 37  | Yes |
|    |                          |        |                                             | VEIANDQGNR             | K | T | 95.00% | 81  |                                              | 614.8218  | 2 | 5.9 | 27  | 37  | Yes |
|    |                          |        |                                             | VHSAVITVPAYFNDSQR      | K | Q | 95.00% | 97  |                                              | 952.4949  | 2 | 8.2 | 140 | 156 | No  |
|    |                          |        |                                             | VHSAVITVPAYFNDSQR      | K | Q | 95.00% | 53  |                                              | 635.3296  | 3 | 3.6 | 140 | 156 | No  |
| 46 | IPI00007750; IPI00794663 | TUBA4A | TUBULIN ALPHA-1 CHAIN.; 48 KDA PROTEIN.     | AFVHWYVGEEMEEGEFSEAR   | R | E | 95.00% | 47  | M11: Oxidation                               | 782.6827  | 3 | 8.1 | 403 | 422 | Yes |
|    |                          |        |                                             | AVFVDLEPTVIDEIR        | R | N | 95.00% | 114 |                                              | 858.4703  | 2 | 6.3 | 65  | 79  | No  |
|    |                          |        |                                             | AVFVDLEPTVIDEIR        | R | N | 95.00% | 94  |                                              | 572.6498  | 3 | 6.9 | 65  | 79  | No  |
|    |                          |        |                                             | DVNAIAIAIK             | K | T | 95.00% | 39  |                                              | 985.5715  | 1 | 3.2 | 327 | 336 | No  |
|    |                          |        |                                             | DVNAIAIAIK             | K | T | 95.00% | 91  |                                              | 493.2895  | 2 | 2.8 | 327 | 336 | No  |
|    |                          |        |                                             | EIIDPVLDR              | K | I | 95.00% | 43  |                                              | 1069.5950 | 1 | 5.3 | 113 | 121 | No  |
|    |                          |        |                                             | EIIDPVLDR              | K | I | 95.00% | 48  |                                              | 535.3010  | 2 | 4.2 | 113 | 121 | No  |
|    |                          |        |                                             | FDGALNVDLTFEQTNLVPYPR  | R | I | 95.00% | 128 |                                              | 1205.1200 | 2 | 9.5 | 244 | 264 | Yes |
|    |                          |        |                                             | FDGALNVDLTFEQTNLVPYPR  | R | I | 95.00% | 64  |                                              | 803.7485  | 3 | 8.6 | 244 | 264 | Yes |
|    |                          |        |                                             | FDLMYAK                | K | R | 95.00% | 33  | M4: Oxidation                                | 452.2205  | 2 | 5.0 | 395 | 401 | Yes |
|    |                          |        |                                             | IHFPLATYAPVISAIEK      | R | A | 95.00% | 94  |                                              | 878.9923  | 2 | 7.4 | 265 | 280 | Yes |
|    |                          |        |                                             | IHFPLATYAPVISAIEK      | R | A | 95.00% | 78  |                                              | 586.3296  | 3 | 5.4 | 265 | 280 | Yes |
|    |                          |        |                                             | LDHKFDLMYAK            | R | R | 95.00% | 38  | M8: Oxidation                                | 698.8528  | 2 | 3.0 | 391 | 401 | Yes |
|    |                          |        |                                             | LISQIVSSITASLR         | R | F | 95.00% | 98  |                                              | 744.4507  | 2 | 9.3 | 230 | 243 | Yes |
|    |                          |        |                                             | LISQIVSSITASLR         | R | F | 95.00% | 83  |                                              | 496.6353  | 3 | 7.1 | 230 | 243 | Yes |
|    |                          |        |                                             | NLDIERPTYTNLNR         | R | L | 95.00% | 60  |                                              | 859.9495  | 2 | 4.9 | 216 | 229 | Yes |
|    |                          |        |                                             | NLDIERPTYTNLNR         | R | L | 95.00% | 50  |                                              | 573.6350  | 3 | 3.9 | 216 | 229 | Yes |
|    |                          |        |                                             | QLFHPEQLITGK           | R | E | 95.00% | 45  |                                              | 705.8943  | 2 | 4.2 | 85  | 96  | Yes |
|    |                          |        |                                             | QLFHPEQLITGK           | R | E | 95.00% | 44  |                                              | 470.9336  | 3 | 7.3 | 85  | 96  | Yes |
|    |                          |        |                                             | QLFHPEQLITGKEDAANNYAR  | R | G | 95.00% | 73  |                                              | 805.7444  | 3 | 5.1 | 85  | 105 | Yes |
|    |                          |        |                                             | VGINYQPPTVPPGGDLAK     | K | V | 95.00% | 84  |                                              | 912.9996  | 2 | 2.8 | 353 | 370 | Yes |
| 47 | IPI00007752              | TUBB2C | TUBULIN BETA-2C CHAIN.                      | ALTVPELTQQMFDKAK       | R | N | 95.00% | 102 | M11: Oxidation                               | 854.4418  | 2 | 7.5 | 283 | 297 | No  |
|    |                          |        |                                             | AVLDLEPGTMDSVVR        | R | S | 95.00% | 102 | M11: Oxidation                               | 809.4167  | 2 | 6.0 | 63  | 77  | No  |
|    |                          |        |                                             | EVDEQMLNVQNK           | K | N | 95.00% | 79  | M6: Oxidation                                | 731.8483  | 2 | 2.7 | 325 | 336 | Yes |
|    |                          |        |                                             | EVDEQMLNVQNK           | K | N | 95.00% | 55  |                                              | 723.8522  | 2 | 4.6 | 325 | 336 | Yes |
|    |                          |        |                                             | FPGQLNADLR             | R | K | 95.00% | 59  |                                              | 565.8047  | 2 | 4.9 | 242 | 251 | Yes |
|    |                          |        |                                             | FWEVISDEHGIDPTGTYHGSD  |   |   |        |     |                                              |           |   |     |     |     |     |
|    |                          |        |                                             | LQLER                  | K | I | 95.00% | 58  |                                              | 1039.4860 | 3 | 5.4 | 20  | 46  | No  |
|    |                          |        |                                             | GHYTEGAELVDSVLDVVR     | K | K | 95.00% | 168 |                                              | 980.0037  | 2 | 8.8 | 104 | 121 | Yes |
|    |                          |        |                                             | GHYTEGAELVDSVLDVVR     | K | K | 95.00% | 68  |                                              | 653.6696  | 3 | 5.5 | 104 | 121 | Yes |
|    |                          |        |                                             | GHYTEGAELVDSVLDVVRK    | K | E | 95.00% | 82  |                                              | 696.3701  | 3 | 8.4 | 104 | 122 | Yes |
|    |                          |        |                                             | GHYTEGAELVDSVLDVVRK    | K | E | 95.00% | 47  |                                              | 522.5282  | 4 | 5.8 | 104 | 122 | Yes |
|    |                          |        |                                             | IMNTFSVVPSPK           | R | V | 95.00% | 88  | M2: Oxidation                                | 668.3550  | 2 | 2.9 | 163 | 174 | Yes |
|    |                          |        |                                             | INVYYNEATGCK           | R | Y | 95.00% | 97  |                                              | 664.8307  | 2 | 3.7 | 47  | 58  | No  |
|    |                          |        |                                             | ISEQFTAMFR             | R | R | 95.00% | 76  | M8: Oxidation                                | 623.3034  | 2 | 4.2 | 381 | 390 | Yes |
|    |                          |        |                                             | KLAVNMVFPFR            | R | L | 95.00% | 56  | M6: Oxidation                                | 644.3694  | 2 | 4.7 | 252 | 262 | Yes |
|    |                          |        |                                             | LAVNMVFPFR             | K | L | 95.00% | 77  | M5: Oxidation                                | 580.3237  | 2 | 8.4 | 253 | 262 | Yes |
|    |                          |        |                                             | LHFFMPGFAPLTSR         | R | G | 95.00% | 43  | M5: Oxidation                                | 818.9237  | 2 | 5.1 | 263 | 276 | Yes |
|    |                          |        |                                             | LHFFMPGFAPLTSR         | R | G | 95.00% | 57  | M5: Oxidation                                | 546.2853  | 3 | 5.5 | 263 | 276 | Yes |
|    |                          |        |                                             | MSATFIGNSTAIQELFK      | K | R | 95.00% | 125 | M1: Oxidation                                | 937.4791  | 2 | 7.1 | 363 | 379 | No  |
|    |                          |        |                                             | MSATFIGNSTAIQELFKR     | K | I | 95.00% | 38  | M1: Oxidation                                | 677.3540  | 3 | 4.1 | 363 | 380 | No  |
|    |                          |        |                                             | MSMKEVDEQMLNVQNK       | R | N | 95.00% | 67  | M1: Oxidation, M3: Oxidation, M10: Oxidation | 986.4527  | 2 | 7.6 | 321 | 336 | Yes |
|    |                          |        |                                             | MSMKEVDEQMLNVQNK       | R | N | 95.00% | 48  | M1: Oxidation, M3: Oxidation, M10: Oxidation | 657.9688  | 3 | 4.1 | 321 | 336 | Yes |
|    |                          |        |                                             | NSSYFVEWIPNNVK         | K | T | 95.00% | 53  |                                              | 848.9281  | 2 | 8.9 | 337 | 350 | Yes |
|    |                          |        |                                             | SGPFGQIFRPDNFVFGSGAGN  |   |   |        |     |                                              |           |   |     |     |     |     |
|    |                          |        |                                             | NWAK                   | R | G | 95.00% | 81  |                                              | 933.4605  | 3 | 7.9 | 78  | 103 | Yes |
|    |                          |        |                                             | YLTVAAVFR              | R | G | 95.00% | 81  |                                              | 520.3027  | 2 | 3.3 | 310 | 318 | Yes |
| 48 | IPI00007765              | HSPA9  | STRESS-70 PROTEIN, MITOCHONDRIAL PRECURSOR. | AQFEGIVTDLIR           | R | R | 95.00% | 88  |                                              | 681.3818  | 2 | 9.3 | 349 | 360 | No  |
|    |                          |        |                                             | AQFEGIVTDLIR           | R | R | 95.00% | 61  |                                              | 454.5884  | 3 | 4.7 | 349 | 360 | No  |
|    |                          |        |                                             | DAGQISGLNVLR           | K | V | 95.00% | 80  |                                              | 621.8463  | 2 | 3.2 | 207 | 218 | No  |
|    |                          |        |                                             | EQQIVIQSSGGLSK         | R | D | 95.00% | 87  |                                              | 737.4028  | 2 | 4.2 | 542 | 555 | No  |
|    |                          |        |                                             | EQQIVIQSSGGLSKDDIENMVK | R | N | 95.00% | 67  | M20: Oxidation                               | 812.0825  | 3 | 7.4 | 542 | 563 | No  |
|    |                          |        |                                             | ERVEAVNMAEGIIHDTETK    | K | M | 95.00% | 56  | M8: Oxidation                                | 720.0254  | 3 | 7.2 | 577 | 595 | No  |
|    |                          |        |                                             | ETGVDLTKDNMALQR        | R | V | 95.00% | 64  | M11: Oxidation                               | 853.9250  | 2 | 2.1 | 293 | 307 | No  |
|    |                          |        |                                             | LLGQFTLIGIPPAPR        | K | G | 95.00% | 74  |                                              | 796.9855  | 2 | 6.1 | 499 | 513 | No  |
|    |                          |        |                                             | LLGQFTLIGIPPAPR        | K | G | 95.00% | 40  |                                              | 531.6602  | 3 | 7.3 | 499 | 513 | No  |
|    |                          |        |                                             | LYSPSQIGAFVLMK         | K | M | 95.00% | 83  | M13: Oxidation                               | 785.4260  | 2 | 5.8 | 160 | 173 | No  |
|    |                          |        |                                             | LYSPSQIGAFVLMK         | K | M | 95.00% | 60  | M13: Oxidation                               | 523.9528  | 3 | 4.9 | 160 | 173 | No  |
|    |                          |        |                                             | MKETAENYLGHHTAK        | K | N | 95.00% | 82  | M1: Oxidation                                | 804.8928  | 2 | 5.3 | 174 | 187 | No  |
|    |                          |        |                                             | MKETAENYLGHHTAK        | K | N | 95.00% | 55  | M1: Oxidation                                | 536.9300  | 3 | 3.2 | 174 | 187 | No  |

49 IPI00007856

MYH2

MYOSIN-2.

|                              |   |   |        |     |                                 |           |   |      |      |      |     |
|------------------------------|---|---|--------|-----|---------------------------------|-----------|---|------|------|------|-----|
| NAVITVPAYFNDSQR              | K | Q | 95.00% | 66  |                                 | 847.9360  | 2 | 8.3  | 188  | 202  | No  |
| QAASSLQQASLK                 | R | L | 95.00% | 41  |                                 | 616.3398  | 2 | 5.8  | 635  | 646  | No  |
| QAVTNPNTFYATK                | R | R | 95.00% | 96  |                                 | 784.8916  | 2 | 2.8  | 108  | 121  | No  |
| RYDDPEVQKDIK                 | R | N | 95.00% | 53  |                                 | 753.3890  | 2 | 6.6  | 127  | 138  | No  |
| SDIGEVILVGGMTR               | K | M | 95.00% | 97  | M12: Oxidation                  | 731.8890  | 2 | 8.3  | 378  | 391  | No  |
| SQVFSTAADGQQTQVEIK           | K | V | 95.00% | 121 |                                 | 904.9600  | 2 | 4.9  | 469  | 485  | No  |
| STNGDTFLGGEDFDQALLR          | K | H | 95.00% | 115 |                                 | 1028.4940 | 2 | 8.1  | 266  | 284  | No  |
| STNGDTFLGGEDFDQALLR          | K | H | 95.00% | 54  |                                 | 685.9959  | 3 | 4.6  | 266  | 284  | No  |
| TTPSVVAFTADGER               | R | L | 95.00% | 90  |                                 | 725.8657  | 2 | 4.0  | 86   | 99   | No  |
| VEAVNMAEGIIHDTETK            | R | M | 95.00% | 85  | M6: Oxidation                   | 936.9606  | 2 | 6.4  | 579  | 595  | No  |
| VEAVNMAEGIIHDTETK            | R | M | 95.00% | 52  | M6: Oxidation                   | 624.9737  | 3 | 2.1  | 579  | 595  | No  |
| VINEPTAAALAYGLDK             | R | S | 95.00% | 109 |                                 | 823.4509  | 2 | 8.4  | 219  | 234  | No  |
| VINEPTAAALAYGLDK             | R | S | 95.00% | 61  |                                 | 549.3010  | 3 | 4.3  | 219  | 234  | No  |
| VQQTVDLFR                    | K | A | 95.00% | 93  |                                 | 645.8470  | 2 | 4.3  | 395  | 405  | No  |
| AAYLQSLNSADLLK               | K | A | 95.00% | 105 |                                 | 753.9156  | 2 | 4.3  | 387  | 400  | Yes |
| AAYLQSLNSADLLK               | K | A | 95.00% | 74  |                                 | 502.9464  | 3 | 4.4  | 387  | 400  | Yes |
| ADIAESQVNK                   | R | L | 95.00% | 52  |                                 | 1074.5510 | 1 | 7.4  | 1916 | 1925 | Yes |
| ADIAESQVNK                   | R | L | 95.00% | 81  |                                 | 537.7761  | 2 | 1.1  | 1916 | 1925 | Yes |
| ADIAESQVNKLR                 | R | V | 95.00% | 34  |                                 | 448.5825  | 3 | 2.7  | 1916 | 1927 | Yes |
| AEAHFALIHYAGVVDYNITGWLE<br>K | K | N | 95.00% | 109 |                                 | 906.4701  | 3 | 8.2  | 576  | 599  | No  |
| AEAHFALIHYAGVVDYNITGWLE<br>K | K | N | 95.00% | 58  |                                 | 680.1039  | 4 | 7.3  | 576  | 599  | No  |
| AEDEEEINAELTAK               | R | K | 95.00% | 117 |                                 | 781.3685  | 2 | 3.7  | 932  | 945  | Yes |
| AEDEEEINAELTAK               | R | K | 95.00% | 73  |                                 | 521.2471  | 3 | 1.3  | 932  | 945  | Yes |
| AGLLGELLEMR                  | K | D | 95.00% | 88  | M10: Oxidation                  | 609.3355  | 2 | 5.4  | 773  | 783  | Yes |
| AGLLGELLEMR                  | K | D | 95.00% | 58  | M10: Oxidation                  | 406.5597  | 3 | 5.7  | 773  | 783  | Yes |
| AGLLGELLEMR                  | K | D | 95.00% | 62  |                                 | 1201.6510 | 1 | -9.1 | 773  | 783  | Yes |
| AGLLGELLEMR                  | K | D | 95.00% | 94  |                                 | 601.3371  | 2 | 3.9  | 773  | 783  | Yes |
| AGLLGELLEMRDDK               | K | L | 95.00% | 72  | M10: Oxidation                  | 788.4116  | 2 | 6.3  | 773  | 786  | No  |
| AGLLGELLEMRDDK               | K | L | 95.00% | 44  | M10: Oxidation                  | 525.9426  | 3 | 4.1  | 773  | 786  | No  |
| AGLLGELLEMRDDK               | K | L | 95.00% | 76  |                                 | 780.4151  | 2 | 7.5  | 773  | 786  | No  |
| AGLLGELLEMRDDK               | K | L | 95.00% | 47  |                                 | 520.6109  | 3 | 4.1  | 773  | 786  | No  |
| AGLLGELLEMRDDKLAQLITR        | K | T | 95.00% | 56  | M10: Oxidation                  | 791.1098  | 3 | 4.9  | 773  | 793  | No  |
| AGLLGELLEMRDDKLAQLITR        | K | T | 95.00% | 32  | M10: Oxidation                  | 593.5849  | 4 | 6.0  | 773  | 793  | No  |
| AGLLGELLEMRDDKLAQLITR        | K | T | 95.00% | 66  |                                 | 785.7807  | 3 | 8.2  | 773  | 793  | No  |
| AGLLGELLEMRDDKLAQLITR        | K | T | 95.00% | 24  |                                 | 589.5864  | 4 | 6.3  | 773  | 793  | No  |
| AITDAAMMAEELK                | K | K | 95.00% | 86  | M7: Oxidation, M8:<br>Oxidation | 713.3404  | 2 | 8.6  | 1764 | 1776 | Yes |
| AITDAAMMAEELK                | K | K | 95.00% | 45  | M7: Oxidation, M8:<br>Oxidation | 475.8937  | 3 | 3.3  | 1764 | 1776 | Yes |
| AITDAAMMAEELKK               | K | E | 95.00% | 102 | M7: Oxidation                   | 769.3866  | 2 | 3.0  | 1764 | 1777 | Yes |
| AITDAAMMAEELKK               | K | E | 95.00% | 44  | M7: Oxidation                   | 513.2606  | 3 | 3.4  | 1764 | 1777 | Yes |
| AITDAAMMAEELKK               | K | E | 95.00% | 83  | M7: Oxidation                   | 777.3852  | 2 | 4.5  | 1764 | 1777 | Yes |
| AITDAAMMAEELKK               | K | E | 95.00% | 52  | M7: Oxidation                   | 518.5913  | 3 | 1.7  | 1764 | 1777 | Yes |
| AITDAAMMAEELKK               | K | E | 95.00% | 83  | M7: Oxidation, M8:<br>Oxidation | 777.3852  | 2 | 4.5  | 1764 | 1777 | Yes |
| AITDAAMMAEELKK               | K | E | 95.00% | 52  | M7: Oxidation, M8:<br>Oxidation | 518.5913  | 3 | 1.7  | 1764 | 1777 | Yes |
| AITDAAMMAEELKK               | K | E | 95.00% | 97  | M8: Oxidation                   | 769.3875  | 2 | 4.2  | 1764 | 1777 | Yes |
| AITDAAMMAEELKK               | K | E | 95.00% | 52  | M8: Oxidation                   | 513.2598  | 3 | 1.9  | 1764 | 1777 | Yes |
| AITDAAMMAEELKK               | K | E | 95.00% | 111 |                                 | 761.3883  | 2 | 1.9  | 1764 | 1777 | Yes |
| AITDAAMMAEELKK               | K | E | 95.00% | 77  |                                 | 507.9281  | 3 | 1.8  | 1764 | 1777 | Yes |
| AITDAAMMAEELKKEQDTSAHLE<br>R | K | M | 95.00% | 37  | M7: Oxidation, M8:<br>Oxidation | 907.4404  | 3 | 6.9  | 1764 | 1787 | Yes |
| ALQEAHQQTLDLQAEEDK           | K | V | 95.00% | 52  |                                 | 728.0195  | 3 | 7.4  | 1004 | 1022 | Yes |
| ALQEAHQQTLDLQAEEDKVNT<br>LTK | K | A | 95.00% | 100 |                                 | 946.8147  | 3 | 5.8  | 1004 | 1028 | Yes |
| ALQEAHQQTLDLQAEEDKVNT<br>LTK | K | A | 95.00% | 63  |                                 | 710.3631  | 4 | 5.9  | 1004 | 1028 | Yes |
| ANLLQAEIEELR                 | R | A | 95.00% | 105 |                                 | 699.8846  | 2 | 1.4  | 1684 | 1695 | Yes |
| ANLLQAEIEELR                 | R | A | 95.00% | 108 |                                 | 466.9276  | 3 | 5.6  | 1684 | 1695 | Yes |
| ANLLQAEIEELRATLEQTER         | R | S | 95.00% | 46  |                                 | 1164.1250 | 2 | 9.2  | 1684 | 1703 | Yes |
| ANLLQAEIEELRATLEQTER         | R | S | 95.00% | 73  |                                 | 776.4185  | 3 | 8.2  | 1684 | 1703 | Yes |
| ANTEVAQWR                    | K | T | 95.00% | 61  |                                 | 1074.5350 | 1 | 2.0  | 1370 | 1378 | No  |
| ANTEVAQWR                    | K | T | 95.00% | 81  |                                 | 537.7719  | 2 | 2.6  | 1370 | 1378 | No  |
| ATLEQTER                     | R | S | 95.00% | 72  |                                 | 474.2453  | 2 | 3.0  | 1696 | 1703 | Yes |
| CELQAALEEEAEASLEHEEGK        | K | I | 95.00% | 44  |                                 | 1093.5080 | 2 | 7.6  | 1544 | 1563 | No  |
| CELQAALEEEAEASLEHEEGK        | K | I | 95.00% | 45  |                                 | 729.3390  | 3 | 4.1  | 1544 | 1563 | No  |
| DDKLAQLITR                   | R | T | 95.00% | 69  |                                 | 586.8381  | 2 | 3.5  | 784  | 793  | No  |

|                         |   |   |        |     |                              |           |   |      |      |      |     |
|-------------------------|---|---|--------|-----|------------------------------|-----------|---|------|------|------|-----|
| DDQVFPNPPK              | K | Y | 95.00% | 90  | M7: Oxidation                | 652.3057  | 2 | 3.1  | 74   | 84   | Yes |
| DDQVFPNPPK              | K | Y | 95.00% | 84  |                              | 644.3124  | 2 | 9.6  | 74   | 84   | Yes |
| DDQVFPNPPKYDK           | K | I | 95.00% | 47  | M7: Oxidation                | 855.4003  | 2 | 4.7  | 74   | 87   | Yes |
| DIDDLTLAK               | K | V | 95.00% | 54  |                              | 1245.6670 | 1 | 7.2  | 959  | 969  | Yes |
| DIDDLTLAK               | K | V | 95.00% | 99  |                              | 623.3293  | 2 | -5.9 | 959  | 969  | Yes |
| DLEEATLQHEATAATLR       | R | K | 95.00% | 159 |                              | 934.9748  | 2 | 3.3  | 1183 | 1199 | Yes |
| DLEEATLQHEATAATLR       | R | K | 95.00% | 65  |                              | 623.6530  | 3 | 4.2  | 1183 | 1199 | Yes |
| DLEEATLQHEATAATLRK      | R | K | 95.00% | 120 |                              | 999.0282  | 2 | 9.0  | 1183 | 1200 | Yes |
| DLEEATLQHEATAATLRK      | R | K | 95.00% | 83  |                              | 666.3520  | 3 | 4.8  | 1183 | 1200 | Yes |
| DPLNETVGLYQK            | K | S | 95.00% | 91  |                              | 738.3958  | 2 | 6.1  | 602  | 614  | Yes |
| DTQIHLDLALR             | K | S | 95.00% | 86  |                              | 648.8323  | 2 | 1.4  | 1658 | 1668 | No  |
| DTQIHLDLALR             | K | S | 95.00% | 38  |                              | 432.8916  | 3 | 3.3  | 1658 | 1668 | No  |
| EAEFQK                  | R | M | 95.00% | 32  |                              | 751.3677  | 1 | 6.7  | 1174 | 1179 | Yes |
| EALVQLSR                | K | G | 95.00% | 52  |                              | 1002.5580 | 1 | -0.4 | 1301 | 1309 | No  |
| EALVQLSR                | K | G | 95.00% | 74  |                              | 501.7846  | 2 | 3.0  | 1301 | 1309 | No  |
| EEQAEPDGTVEADK          | R | A | 95.00% | 98  |                              | 759.3368  | 2 | 3.3  | 373  | 386  | Yes |
| EEQAEPDGTVEADKAAAYLQSLN |   |   |        |     |                              |           |   |      |      |      |     |
| SADLLK                  | R | A | 95.00% | 84  |                              | 1002.4970 | 3 | 5.4  | 373  | 400  | Yes |
| EFEISNLQSK              | K | I | 95.00% | 59  |                              | 1194.6090 | 1 | 6.5  | 1090 | 1099 | No  |
| EFEISNLQSK              | K | I | 95.00% | 74  |                              | 597.8066  | 2 | 3.9  | 1090 | 1099 | No  |
| EKNDLQLVQAEAEGLADAEER   | K | C | 95.00% | 167 |                              | 1228.6090 | 2 | 7.7  | 889  | 910  | No  |
| EKNDLQLVQAEAEGLADAEER   | K | C | 95.00% | 113 |                              | 819.4094  | 3 | 8.9  | 889  | 910  | No  |
| EKSEMKEIDDLASNVETVSK    | K | A | 95.00% | 50  | M5: Oxidation                | 800.3869  | 3 | 5.4  | 1226 | 1246 | No  |
| EKSEMKEIDDLASNVETVSK    | K | A | 95.00% | 99  | M5: Oxidation                | 1208.0750 | 2 | 6.7  | 1226 | 1246 | No  |
| EKSEMKEIDDLASNVETVSK    | K | A | 95.00% | 72  | M5: Oxidation                | 805.7170  | 3 | 3.5  | 1226 | 1246 | No  |
| EKSEMKEIDDLASNVETVSK    | K | A | 95.00% | 99  | M5: Oxidation, M7: Oxidation | 1208.0750 | 2 | 6.7  | 1226 | 1246 | No  |
| EKSEMKEIDDLASNVETVSK    | K | A | 95.00% | 72  | M5: Oxidation, M7: Oxidation | 805.7170  | 3 | 3.5  | 1226 | 1246 | No  |
| EKSEMKEIDDLASNVETVSK    | K | A | 95.00% | 58  | M7: Oxidation                | 800.3870  | 3 | 5.5  | 1226 | 1246 | No  |
| ELEEISER                | R | L | 95.00% | 49  |                              | 1004.4910 | 1 | 0.9  | 1148 | 1155 | Yes |
| ELEEISER                | R | L | 95.00% | 42  |                              | 502.7503  | 2 | 2.7  | 1148 | 1155 | Yes |
| ELEEISERLEEAGGATSAQIEMN | R | K | 95.00% | 100 | M22: Oxidation               | 1325.6430 | 2 | 9.9  | 1148 | 1171 | Yes |
| ELEEISERLEEAGGATSAQIEMN | R | K | 95.00% | 95  | M22: Oxidation               | 884.0965  | 3 | 8.4  | 1148 | 1171 | Yes |
| ELEEISERLEEAGGATSAQIEMN | R | K | 95.00% | 76  | M22: Oxidation               | 663.3228  | 4 | 6.1  | 1148 | 1171 | Yes |
| ELEEISERLEEAGGATSAQIEMN | R | K | 95.00% | 120 |                              | 1317.6430 | 2 | 7.9  | 1148 | 1171 | Yes |
| ELEEISERLEEAGGATSAQIEMN | R | K | 95.00% | 84  |                              | 878.7634  | 3 | 6.7  | 1148 | 1171 | Yes |
| ELEEISERLEEAGGATSAQIEMN | R | K | 95.00% | 51  |                              | 659.3240  | 4 | 5.9  | 1148 | 1171 | Yes |
| ELEEISERLEEAGGATSAQIEMN | R | R | 95.00% | 70  | M22: Oxidation               | 926.7932  | 3 | 6.2  | 1148 | 1172 | Yes |
| ELEEISERLEEAGGATSAQIEMN | R | R | 95.00% | 37  | M22: Oxidation               | 695.3460  | 4 | 5.0  | 1148 | 1172 | Yes |
| ELEEISERLEEAGGATSAQIEMN | R | R | 95.00% | 47  |                              | 921.4638  | 3 | 8.7  | 1148 | 1172 | Yes |
| ELEGEVESEQK             | R | R | 95.00% | 49  |                              | 638.8011  | 2 | 2.7  | 1827 | 1837 | Yes |
| ELEGEVESEQKR            | R | N | 95.00% | 74  |                              | 716.8548  | 2 | 6.8  | 1827 | 1838 | Yes |
| ELEGEVESEQKR            | R | N | 95.00% | 38  |                              | 478.2381  | 3 | 4.6  | 1827 | 1838 | Yes |
| ELTYQTEEDR              | K | K | 95.00% | 51  |                              | 642.2961  | 2 | 6.8  | 1855 | 1864 | Yes |
| ELTYQTEEDRK             | K | N | 95.00% | 70  |                              | 706.3410  | 2 | 2.5  | 1855 | 1865 | Yes |
| ELTYQTEEDRK             | K | N | 95.00% | 42  |                              | 471.2320  | 3 | 6.8  | 1855 | 1865 | Yes |
| ELTYQTEEDRKNILR         | K | L | 95.00% | 46  |                              | 954.5008  | 2 | 5.8  | 1855 | 1869 | Yes |
| ELTYQTEEDRKNILR         | K | L | 95.00% | 39  |                              | 636.6688  | 3 | 4.2  | 1855 | 1869 | Yes |
| EMATMKEEFQK             | K | I | 95.00% | 41  | M2: Oxidation                | 694.3182  | 2 | 3.5  | 854  | 864  | No  |
| EMATMKEEFQK             | K | I | 95.00% | 45  | M2: Oxidation                | 702.3162  | 2 | 4.3  | 854  | 864  | No  |
| EMATMKEEFQK             | K | I | 95.00% | 34  | M2: Oxidation                | 468.5471  | 3 | 5.0  | 854  | 864  | No  |
| EMATMKEEFQK             | K | I | 95.00% | 45  | M2: Oxidation, M5: Oxidation | 702.3162  | 2 | 4.3  | 854  | 864  | No  |
| EMATMKEEFQK             | K | I | 95.00% | 35  | M2: Oxidation, M5: Oxidation | 468.5475  | 3 | 5.8  | 854  | 864  | No  |
| EMATMKEEFQK             | K | I | 95.00% | 48  | M5: Oxidation                | 694.3182  | 2 | 3.5  | 854  | 864  | No  |
| EMATMKEEFQK             | K | I | 95.00% | 56  |                              | 686.3207  | 2 | 3.4  | 854  | 864  | No  |
| ENKNLQQEISDLTEQIAEGGK   | R | R | 95.00% | 56  |                              | 782.0655  | 3 | 7.4  | 1507 | 1527 | Yes |

|                          |   |   |        |     |                                                  |           |   |     |      |      |     |
|--------------------------|---|---|--------|-----|--------------------------------------------------|-----------|---|-----|------|------|-----|
| ENKNLQQEISDLTEQIAEGGKR   | R | I | 95.00% | 59  |                                                  | 834.1010  | 3 | 9.1 | 1507 | 1528 | Yes |
| ENKNLQQEISDLTEQIAEGGKR   | R | I | 95.00% | 50  |                                                  | 625.8258  | 4 | 6.1 | 1507 | 1528 | Yes |
| ENQSILITGESGAGK          | R | T | 95.00% | 118 |                                                  | 752.3882  | 2 | 1.9 | 171  | 185  | Yes |
| ENQSILITGESGAGK          | R | T | 95.00% | 46  |                                                  | 501.9288  | 3 | 3.5 | 171  | 185  | Yes |
| EODTSAHLER               | K | M | 95.00% | 69  |                                                  | 593.2841  | 2 | 8.6 | 1778 | 1787 | Yes |
| EQLAMVER                 | K | R | 95.00% | 54  | M5: Oxidation                                    | 496.2496  | 2 | 3.0 | 1675 | 1682 | Yes |
| EQLAMVER                 | K | R | 95.00% | 41  |                                                  | 488.2543  | 2 | 7.4 | 1675 | 1682 | Yes |
| EQYEEEQESK               | R | A | 95.00% | 54  |                                                  | 649.7764  | 2 | 4.7 | 1351 | 1360 | No  |
| EQYEEEQESKAE LQR         | R | A | 95.00% | 113 |                                                  | 948.4391  | 2 | 4.3 | 1351 | 1365 | No  |
| EQYEEEQESKAE LQR         | R | A | 95.00% | 47  |                                                  | 632.6265  | 3 | 0.8 | 1351 | 1365 | No  |
| ERIEAQNRPFDK             | R | T | 95.00% | 34  |                                                  | 787.4102  | 2 | 2.3 | 23   | 35   | No  |
| EVT ERAE DEEEINAELTAK    | K | K | 95.00% | 123 |                                                  | 1088.5220 | 2 | 4.6 | 927  | 945  | Yes |
| EVT ERAE DEEEINAELTAK    | K | K | 95.00% | 64  |                                                  | 726.0180  | 3 | 5.7 | 927  | 945  | Yes |
| GFLAR                    | R | V | 95.00% | 24  |                                                  | 563.3323  | 1 | 3.0 | 800  | 804  | Yes |
| GKAEAHFALIH YAGVVDYNITGW |   |   |        |     |                                                  |           |   |     |      |      |     |
| LEK                      | K | N | 95.00% | 83  |                                                  | 968.1733  | 3 | 5.4 | 574  | 599  | No  |
| GKAEAHFALIH YAGVVDYNITGW |   |   |        |     |                                                  |           |   |     |      |      |     |
| LEK                      | K | N | 95.00% | 33  |                                                  | 726.3828  | 4 | 6.6 | 574  | 599  | No  |
| GKQAF TQIEELKR           | R | Q | 95.00% | 103 |                                                  | 838.4631  | 2 | 2.9 | 1310 | 1323 | Yes |
| GKQAF TQIEELKR           | R | Q | 95.00% | 75  |                                                  | 559.3111  | 3 | 2.5 | 1310 | 1323 | Yes |
| GKQAF TQIEELKR           | R | Q | 95.00% | 35  |                                                  | 419.7347  | 4 | 1.2 | 1310 | 1323 | Yes |
| GQTVEQVSNV GALAK         | K | A | 95.00% | 128 |                                                  | 786.4274  | 2 | 4.9 | 417  | 432  | No  |
| GQTVEQVSNV GALAK         | K | A | 95.00% | 86  |                                                  | 524.6203  | 3 | 3.7 | 417  | 432  | No  |
| GRLQTESGEFSR             | R | Q | 95.00% | 54  |                                                  | 683.8425  | 2 | 4.1 | 1284 | 1295 | No  |
| GRLQTESGEFSR             | R | Q | 95.00% | 77  |                                                  | 456.2314  | 3 | 5.3 | 1284 | 1295 | No  |
| GSSFQTVSALFR             | K | E | 95.00% | 46  |                                                  | 1299.6800 | 1 | 7.8 | 647  | 658  | Yes |
| GSSFQTVSALFR             | K | E | 95.00% | 99  |                                                  | 650.3406  | 2 | 2.9 | 647  | 658  | Yes |
| GSSFQTVSALFR             | K | E | 95.00% | 47  |                                                  | 433.8970  | 3 | 4.3 | 647  | 658  | Yes |
| HADSV AELGEQIDNLQR       | K | V | 95.00% | 166 |                                                  | 947.9739  | 2 | 7.4 | 1202 | 1218 | Yes |
| HADSV AELGEQIDNLQR       | K | V | 95.00% | 85  |                                                  | 632.3179  | 3 | 6.4 | 1202 | 1218 | Yes |
| IAEKDEEIDQLK             | K | R | 95.00% | 92  |                                                  | 715.8789  | 2 | 8.2 | 1582 | 1593 | Yes |
| IAEKDEEIDQLK             | K | R | 95.00% | 50  |                                                  | 477.5868  | 3 | 4.6 | 1582 | 1593 | Yes |
| IAEKDEEIDQLKR            | K | N | 95.00% | 95  |                                                  | 793.9271  | 2 | 4.4 | 1582 | 1594 | Yes |
| IAEKDEEIDQLKR            | K | N | 95.00% | 79  |                                                  | 529.6197  | 3 | 2.6 | 1582 | 1594 | Yes |
| IAEQELLDASER             | K | V | 95.00% | 87  |                                                  | 687.3516  | 2 | 2.9 | 1707 | 1718 | Yes |
| IAEQELLDASER             | K | V | 95.00% | 37  |                                                  | 458.5717  | 3 | 6.0 | 1707 | 1718 | Yes |
| IEAQNRPFDK               | R | T | 95.00% | 71  |                                                  | 644.8393  | 2 | 4.4 | 25   | 35   | No  |
| IEDEQALGIQLQK            | K | K | 95.00% | 131 |                                                  | 742.9053  | 2 | 4.3 | 1100 | 1112 | No  |
| IEDEQALGIQLQK            | K | K | 95.00% | 88  |                                                  | 495.6058  | 3 | 3.7 | 1100 | 1112 | No  |
| IEDEQALGIQLQKK           | K | I | 95.00% | 81  |                                                  | 806.9530  | 2 | 4.2 | 1100 | 1113 | No  |
| IEDEQALGIQLQKK           | K | I | 95.00% | 34  |                                                  | 538.3045  | 3 | 4.0 | 1100 | 1113 | No  |
|                          |   |   |        |     |                                                  |           |   |     |      |      |     |
|                          |   |   |        |     |                                                  |           |   |     |      |      |     |
| IEDMAMMTHLHEPAVLN LK     | K | E | 95.00% | 43  | M4: Oxidation, M6: Oxidation, M7: Oxidation, M7: | 802.0569  | 3 | 8.3 | 88   | 107  | Yes |
|                          |   |   |        |     |                                                  |           |   |     |      |      |     |
| IEDMAMMTHLHEPAVLN LK     | K | E | 95.00% | 35  | Oxidation                                        | 601.7939  | 4 | 7.0 | 88   | 107  | Yes |
| IEDMAMMTHLHEPAVLN LK     | K | E | 95.00% | 58  | M6: Oxidation                                    | 791.3938  | 3 | 8.5 | 88   | 107  | Yes |
| IEDMAMMTHLHEPAVLN LK     | K | E | 95.00% | 39  | M6: Oxidation                                    | 796.7230  | 3 | 5.4 | 88   | 107  | Yes |
|                          |   |   |        |     |                                                  |           |   |     |      |      |     |
| IEDMAMMTHLHEPAVLN LK     | K | E | 95.00% | 39  | M6: Oxidation, M7: Oxidation                     | 796.7230  | 3 | 5.4 | 88   | 107  | Yes |
| IEDMAMMTHLHEPAVLN LK     | K | E | 95.00% | 46  | M7: Oxidation                                    | 791.3921  | 3 | 6.4 | 88   | 107  | Yes |
| IEDMAMMTHLHEPAVLN LK     | K | E | 95.00% | 58  |                                                  | 786.0606  | 3 | 6.6 | 88   | 107  | Yes |
| IEEEEEIEAER              | R | A | 95.00% | 103 |                                                  | 744.8617  | 2 | 5.7 | 1121 | 1132 | Yes |
| IEEEEEIEAER              | R | A | 95.00% | 67  |                                                  | 496.9096  | 3 | 4.0 | 1121 | 1132 | Yes |
| IHF GTTGK                | R | L | 95.00% | 46  |                                                  | 860.4694  | 1 | 7.2 | 253  | 260  | Yes |
| IHF GTTGK                | R | L | 95.00% | 29  |                                                  | 430.7379  | 2 | 5.7 | 253  | 260  | Yes |
| IKDELAK                  | K | S | 95.00% | 32  |                                                  | 408.7472  | 2 | 3.9 | 865  | 871  | No  |
| IKELQAR                  | K | I | 95.00% | 31  |                                                  | 429.2654  | 2 | 2.3 | 1114 | 1120 | Yes |
| IKEVTER                  | K | A | 95.00% | 35  |                                                  | 437.7546  | 2 | 1.7 | 925  | 931  | Yes |
| IKEVTERAEDEEEINAELTAK    | K | K | 95.00% | 115 |                                                  | 1209.1170 | 2 | 9.3 | 925  | 945  | Yes |
| IKEVTERAEDEEEINAELTAK    | K | K | 95.00% | 82  |                                                  | 806.4095  | 3 | 3.4 | 925  | 945  | Yes |
| IKEVTERAEDEEEINAELTAK    | K | K | 95.00% | 50  |                                                  | 605.0596  | 4 | 4.3 | 925  | 945  | Yes |
| IKLEQQVDDLEGSLEQEK       | K | K | 95.00% | 166 |                                                  | 1051.0440 | 2 | 6.2 | 1031 | 1048 | Yes |
| IKLEQQVDDLEGSLEQEK       | K | K | 95.00% | 72  |                                                  | 701.0316  | 3 | 5.8 | 1031 | 1048 | Yes |
| IKLEQQVDDLEGSLEQEKK      | K | L | 95.00% | 137 |                                                  | 1115.0950 | 2 | 9.1 | 1031 | 1049 | No  |
| IKLEQQVDDLEGSLEQEKK      | K | L | 95.00% | 82  |                                                  | 743.7285  | 3 | 3.6 | 1031 | 1049 | No  |
| IKLEQQVDDLEGSLEQEKK      | K | L | 95.00% | 45  |                                                  | 558.0484  | 4 | 3.7 | 1031 | 1049 | No  |
| IKNAYEESLDQLET LK        | K | R | 95.00% | 115 |                                                  | 947.5031  | 2 | 9.1 | 1490 | 1505 | Yes |
| IKNAYEESLDQLET LK        | K | R | 95.00% | 64  |                                                  | 632.0006  | 3 | 2.6 | 1490 | 1505 | Yes |

|                         |   |   |        |     |                                |           |   |     |      |      |     |
|-------------------------|---|---|--------|-----|--------------------------------|-----------|---|-----|------|------|-----|
| IKNAYEESLDQLETLKR       | K | E | 95.00% | 144 |                                | 1025.5530 | 2 | 7.5 | 1490 | 1506 | Yes |
| IKNAYEESLDQLETLKR       | K | E | 95.00% | 88  |                                | 684.0358  | 3 | 4.6 | 1490 | 1506 | Yes |
| IKNAYEESLDQLETLKR       | K | E | 95.00% | 74  |                                | 513.2789  | 4 | 4.8 | 1490 | 1506 | Yes |
| ILAEWK                  | K | Q | 95.00% | 33  |                                | 759.4422  | 1 | 2.1 | 1458 | 1463 | Yes |
| ILYADFK                 | R | Q | 95.00% | 47  |                                | 869.4793  | 1 | 2.2 | 719  | 725  | Yes |
| ILYADFK                 | R | Q | 95.00% | 55  |                                | 435.2437  | 2 | 2.5 | 719  | 725  | Yes |
| INQLDTK                 | R | Q | 95.00% | 55  |                                | 480.2638  | 2 | 3.6 | 446  | 453  | Yes |
| INQLDTKQPR              | R | Q | 95.00% | 60  |                                | 670.8722  | 2 | 5.7 | 446  | 456  | Yes |
| INQLDTKQPR              | R | Q | 95.00% | 37  |                                | 447.5833  | 3 | 4.1 | 446  | 456  | Yes |
| IQGTLEDQIISANPLLEAFGNAK | K | T | 95.00% | 129 |                                | 1221.6510 | 2 | 2.6 | 215  | 237  | No  |
| IQGTLEDQIISANPLLEAFGNAK | K | T | 95.00% | 121 |                                | 814.7736  | 3 | 6.9 | 215  | 237  | No  |
| IQLEAK                  | K | I | 95.00% | 37  |                                | 701.4219  | 1 | 2.9 | 919  | 924  | Yes |
| IQLELNQVK               | R | S | 95.00% | 46  |                                | 1084.6430 | 1 | 5.9 | 1567 | 1575 | Yes |
| IQLELNQVK               | R | S | 95.00% | 74  |                                | 542.8235  | 2 | 2.1 | 1567 | 1575 | Yes |
| IQLELNQVKSEVDR          | R | K | 95.00% | 62  |                                | 835.9645  | 2 | 8.0 | 1567 | 1580 | Yes |
| IQLELNQVKSEVDRK         | R | I | 95.00% | 28  |                                | 450.5092  | 4 | 5.9 | 1567 | 1581 | Yes |
| IVESMQSTLDAEIR          | R | S | 95.00% | 129 | M5: Oxidation                  | 804.4081  | 2 | 8.2 | 1599 | 1612 | Yes |
| IVESMQSTLDAEIR          | R | S | 95.00% | 55  | M5: Oxidation                  | 536.6071  | 3 | 6.6 | 1599 | 1612 | Yes |
| IVESMQSTLDAEIR          | R | S | 95.00% | 114 |                                | 796.4084  | 2 | 5.4 | 1599 | 1612 | Yes |
| IVESMQSTLDAEIR          | R | S | 95.00% | 65  |                                | 531.2747  | 3 | 5.1 | 1599 | 1612 | Yes |
| KAITDAAMMAEELKK         | K | E | 95.00% | 101 | M8: Oxidation                  | 833.4363  | 2 | 5.3 | 1763 | 1777 | Yes |
| KAITDAAMMAEELKK         | K | E | 95.00% | 81  | M8: Oxidation                  | 555.9587  | 3 | 2.7 | 1763 | 1777 | Yes |
| KAITDAAMMAEELKK         | K | E | 95.00% | 35  | M8: Oxidation                  | 417.2235  | 4 | 8.8 | 1763 | 1777 | Yes |
| KAITDAAMMAEELKK         | K | E | 95.00% | 80  | M8: Oxidation                  | 841.4315  | 2 | 2.7 | 1763 | 1777 | Yes |
| KAITDAAMMAEELKK         | K | E | 95.00% | 64  | M8: Oxidation                  | 561.2909  | 3 | 3.8 | 1763 | 1777 | Yes |
| KAITDAAMMAEELKK         | K | E | 95.00% | 80  | M8: Oxidation, M9: Oxidation   | 841.4315  | 2 | 2.7 | 1763 | 1777 | Yes |
| KAITDAAMMAEELKK         | K | E | 95.00% | 64  | M8: Oxidation, M9: Oxidation   | 561.2909  | 3 | 3.8 | 1763 | 1777 | Yes |
| KAITDAAMMAEELKK         | K | E | 95.00% | 103 | M9: Oxidation                  | 833.4359  | 2 | 4.9 | 1763 | 1777 | Yes |
| KAITDAAMMAEELKK         | K | E | 95.00% | 63  | M9: Oxidation                  | 555.9584  | 3 | 2.3 | 1763 | 1777 | Yes |
| KAITDAAMMAEELKK         | K | E | 95.00% | 37  | M9: Oxidation                  | 417.2219  | 4 | 5.0 | 1763 | 1777 | Yes |
| KAITDAAMMAEELKK         | K | E | 95.00% | 107 |                                | 825.4387  | 2 | 5.2 | 1763 | 1777 | Yes |
| KAITDAAMMAEELKK         | K | E | 95.00% | 92  |                                | 550.6276  | 3 | 3.8 | 1763 | 1777 | Yes |
| KAITDAAMMAEELKK         | K | E | 95.00% | 42  |                                | 413.2216  | 4 | 1.3 | 1763 | 1777 | Yes |
| KALQEAHQQTLDLQAEEDKVN   |   |   |        |     |                                |           |   |     |      |      |     |
| TLTK                    | K | A | 95.00% | 112 |                                | 989.5156  | 3 | 8.1 | 1003 | 1028 | Yes |
| KALQEAHQQTLDLQAEEDKVN   |   |   |        |     |                                |           |   |     |      |      |     |
| TLTK                    | K | A | 95.00% | 62  |                                | 742.3849  | 4 | 3.0 | 1003 | 1028 | Yes |
| KALQEAHQQTLDLQAEEDKVN   |   |   |        |     |                                |           |   |     |      |      |     |
| TLTK                    | K | A | 95.00% | 35  |                                | 594.1111  | 5 | 5.8 | 1003 | 1028 | Yes |
| KDIDDLELTLAK            | K | V | 95.00% | 109 |                                | 687.3849  | 2 | 6.4 | 958  | 969  | Yes |
| KDIDDLELTLAK            | K | V | 95.00% | 46  |                                | 458.5916  | 3 | 4.3 | 958  | 969  | Yes |
| KEFEISNLQSK             | K | I | 95.00% | 69  |                                | 661.8563  | 2 | 6.9 | 1089 | 1099 | No  |
| KEFEISNLQSK             | K | I | 95.00% | 38  |                                | 441.5729  | 3 | 5.6 | 1089 | 1099 | No  |
| KGSSFQTVSALFR           | K | E | 95.00% | 125 |                                | 714.3884  | 2 | 3.1 | 646  | 658  | Yes |
| KGSSFQTVSALFR           | K | E | 95.00% | 57  |                                | 476.5949  | 3 | 3.2 | 646  | 658  | Yes |
| KHADSVaelGEQIDNLQR      | K | V | 95.00% | 137 |                                | 1012.0210 | 2 | 6.5 | 1201 | 1218 | Yes |
| KHADSVaelGEQIDNLQR      | K | V | 95.00% | 93  |                                | 675.0148  | 3 | 3.8 | 1201 | 1218 | Yes |
| KHADSVaelGEQIDNLQR      | K | V | 95.00% | 66  |                                | 506.5136  | 4 | 4.9 | 1201 | 1218 | Yes |
| KIAEKDEEIDQLK           | R | R | 95.00% | 31  |                                | 520.2861  | 3 | 6.2 | 1581 | 1593 | No  |
| KIAEQELLDASER           | R | V | 95.00% | 123 |                                | 751.3984  | 2 | 1.7 | 1706 | 1718 | Yes |
| KIAEQELLDASER           | R | V | 95.00% | 64  |                                | 501.2686  | 3 | 2.5 | 1706 | 1718 | Yes |
| KKEEITSGK               | K | I | 95.00% | 39  |                                | 510.2911  | 2 | 0.6 | 206  | 214  | No  |
| KKEFEISNLQSK            | K | I | 95.00% | 96  |                                | 725.9011  | 2 | 2.5 | 1088 | 1099 | No  |
| KKEFEISNLQSK            | K | I | 95.00% | 57  |                                | 484.2698  | 3 | 2.2 | 1088 | 1099 | No  |
| KKGSSFQTVSALFR          | K | E | 95.00% | 66  |                                | 778.4344  | 2 | 0.8 | 645  | 658  | Yes |
| KKGSSFQTVSALFR          | K | E | 95.00% | 49  |                                | 519.2949  | 3 | 6.0 | 645  | 658  | Yes |
| KKHADSVaelGEQIDNLQR     | R | V | 95.00% | 89  |                                | 717.7142  | 3 | 5.1 | 1200 | 1218 | Yes |
| KKHADSVaelGEQIDNLQR     | R | V | 95.00% | 53  |                                | 538.5365  | 4 | 3.1 | 1200 | 1218 | Yes |
| KKLETDISMQGEMEDILQEAR   | K | N | 95.00% | 90  | M10: Oxidation                 | 870.0991  | 3 | 8.1 | 1734 | 1755 | No  |
| KKLETDISMQGEMEDILQEAR   | K | N | 95.00% | 35  | M10: Oxidation                 | 652.8235  | 4 | 4.0 | 1734 | 1755 | No  |
| KKLETDISMQGEMEDILQEAR   | K | N | 95.00% | 93  | M10: Oxidation                 | 875.4277  | 3 | 4.7 | 1734 | 1755 | No  |
| KKLETDISMQGEMEDILQEAR   | K | N | 95.00% | 41  | M10: Oxidation                 | 656.8224  | 4 | 4.3 | 1734 | 1755 | No  |
| KKLETDISMQGEMEDILQEAR   | K | N | 95.00% | 93  | M10: Oxidation, M14: Oxidation | 875.4277  | 3 | 4.7 | 1734 | 1755 | No  |

|                              |   |   |        |     |                                                     |           |   |     |      |      |     |
|------------------------------|---|---|--------|-----|-----------------------------------------------------|-----------|---|-----|------|------|-----|
| KKLETDISMQGEMEDILQEAR        | K | N | 95.00% | 41  | M10: Oxidation,<br>M14: Oxidation                   | 656.8224  | 4 | 4.3 | 1734 | 1755 | No  |
| KKLETDISMQGEMEDILQEAR        | K | N | 95.00% | 62  | M14: Oxidation                                      | 870.0975  | 3 | 6.4 | 1734 | 1755 | No  |
| KKLETDISMQGEMEDILQEAR        | K | N | 95.00% | 96  |                                                     | 864.7649  | 3 | 5.4 | 1734 | 1755 | No  |
| KKLETDISMQGEMEDILQEAR        | K | N | 95.00% | 56  |                                                     | 648.8265  | 4 | 6.7 | 1734 | 1755 | No  |
| KKMEGDLNEMEIQLNHANR          | K | M | 95.00% | 39  | M10: Oxidation                                      | 762.7066  | 3 | 3.1 | 1622 | 1640 | Yes |
| KKMEGDLNEMEIQLNHANR          | K | M | 95.00% | 39  | M10: Oxidation                                      | 572.2825  | 4 | 4.2 | 1622 | 1640 | Yes |
| KKMEGDLNEMEIQLNHANR          | K | M | 95.00% | 70  | M3: Oxidation                                       | 762.7060  | 3 | 2.4 | 1622 | 1640 | Yes |
| KKMEGDLNEMEIQLNHANR          | K | M | 95.00% | 77  | M3: Oxidation                                       | 572.2819  | 4 | 3.1 | 1622 | 1640 | Yes |
| KKMEGDLNEMEIQLNHANR          | K | M | 95.00% | 58  | M3: Oxidation                                       | 768.0369  | 3 | 1.3 | 1622 | 1640 | Yes |
| KKMEGDLNEMEIQLNHANR          | K | M | 95.00% | 54  | M3: Oxidation,<br>M3: Oxidation,                    | 576.2810  | 4 | 3.7 | 1622 | 1640 | Yes |
| KKMEGDLNEMEIQLNHANR          | K | M | 95.00% | 58  | M10: Oxidation,<br>M3: Oxidation,<br>M10: Oxidation | 768.0369  | 3 | 1.3 | 1622 | 1640 | Yes |
| KKMEGDLNEMEIQLNHANR          | K | M | 95.00% | 54  |                                                     | 576.2810  | 4 | 3.7 | 1622 | 1640 | Yes |
| KKMEGDLNEMEIQLNHANR          | K | M | 95.00% | 53  |                                                     | 757.3764  | 3 | 4.9 | 1622 | 1640 | Yes |
| KKMEGDLNEMEIQLNHANR          | K | M | 95.00% | 79  |                                                     | 568.2838  | 4 | 4.2 | 1622 | 1640 | Yes |
| KLEGDLK                      | R | L | 95.00% | 39  |                                                     | 401.7396  | 2 | 4.6 | 1060 | 1066 | Yes |
| KLETDISMQGEMEDILQEAR         | K | N | 95.00% | 67  | M13: Oxidation                                      | 827.3995  | 3 | 7.2 | 1735 | 1755 | No  |
| KLETDISMQGEMEDILQEAR         | K | N | 95.00% | 99  | M9: Oxidation                                       | 1240.5960 | 2 | 7.7 | 1735 | 1755 | No  |
| KLETDISMQGEMEDILQEAR         | K | N | 95.00% | 75  | M9: Oxidation                                       | 827.3989  | 3 | 6.5 | 1735 | 1755 | No  |
| KLETDISMQGEMEDILQEAR         | K | N | 95.00% | 80  | M9: Oxidation                                       | 1248.5950 | 2 | 9.1 | 1735 | 1755 | No  |
| KLETDISMQGEMEDILQEAR         | K | N | 95.00% | 92  | M9: Oxidation,<br>M9: Oxidation,                    | 832.7300  | 3 | 5.8 | 1735 | 1755 | No  |
| KLETDISMQGEMEDILQEAR         | K | N | 95.00% | 93  | M13: Oxidation,<br>M9: Oxidation,                   | 1248.5890 | 2 | 4.2 | 1735 | 1755 | No  |
| KLETDISMQGEMEDILQEAR         | K | N | 95.00% | 92  | M13: Oxidation                                      | 832.7300  | 3 | 5.8 | 1735 | 1755 | No  |
| KLETDISMQGEMEDILQEAR         | K | N | 95.00% | 122 |                                                     | 1232.6010 | 2 | 9.3 | 1735 | 1755 | No  |
| KLETDISMQGEMEDILQEAR         | K | N | 95.00% | 72  |                                                     | 822.0666  | 3 | 5.6 | 1735 | 1755 | No  |
| KLQHELEEAER                  | R | A | 95.00% | 84  |                                                     | 755.8823  | 2 | 4.3 | 1904 | 1915 | Yes |
| KLQHELEEAER                  | R | A | 95.00% | 64  |                                                     | 504.2562  | 3 | 1.7 | 1904 | 1915 | Yes |
| KLQHELEEAERADIAESQVNK        | R | L | 95.00% | 93  |                                                     | 1283.6470 | 2 | 4.3 | 1904 | 1925 | Yes |
| KLQHELEEAERADIAESQVNK        | R | L | 95.00% | 46  |                                                     | 856.0989  | 3 | 2.3 | 1904 | 1925 | Yes |
| KLQHELEEAERADIAESQVNK        | R | L | 95.00% | 69  |                                                     | 642.3272  | 4 | 4.0 | 1904 | 1925 | Yes |
| KMEGDLNEMEIQLNHANR           | K | M | 95.00% | 46  | M2: Oxidation                                       | 1079.5140 | 2 | 8.4 | 1623 | 1640 | Yes |
| KMEGDLNEMEIQLNHANR           | K | M | 95.00% | 76  | M2: Oxidation                                       | 720.0093  | 3 | 4.8 | 1623 | 1640 | Yes |
| KMEGDLNEMEIQLNHANR           | K | M | 95.00% | 53  | M2: Oxidation                                       | 540.2613  | 4 | 9.1 | 1623 | 1640 | Yes |
| KMEGDLNEMEIQLNHANR           | K | M | 95.00% | 90  | M2: Oxidation                                       | 1087.5110 | 2 | 8.1 | 1623 | 1640 | Yes |
| KMEGDLNEMEIQLNHANR           | K | M | 95.00% | 57  | M2: Oxidation                                       | 725.3447  | 3 | 9.9 | 1623 | 1640 | Yes |
| KMEGDLNEMEIQLNHANR           | K | M | 95.00% | 50  | M2: Oxidation                                       | 544.2559  | 4 | 1.3 | 1623 | 1640 | Yes |
| KMEGDLNEMEIQLNHANR           | K | M | 95.00% | 90  | M2: Oxidation, M9:<br>Oxidation                     | 1087.5110 | 2 | 8.1 | 1623 | 1640 | Yes |
| KMEGDLNEMEIQLNHANR           | K | M | 95.00% | 57  | M2: Oxidation, M9:<br>Oxidation                     | 725.3447  | 3 | 9.9 | 1623 | 1640 | Yes |
| KMEGDLNEMEIQLNHANR           | K | M | 95.00% | 50  | M2: Oxidation, M9:<br>Oxidation                     | 544.2559  | 4 | 1.3 | 1623 | 1640 | Yes |
| KMEGDLNEMEIQLNHANR           | K | M | 95.00% | 69  | M9: Oxidation                                       | 1079.5140 | 2 | 8.5 | 1623 | 1640 | Yes |
| KMEGDLNEMEIQLNHANR           | K | M | 95.00% | 67  | M9: Oxidation                                       | 720.0086  | 3 | 3.7 | 1623 | 1640 | Yes |
| KMEGDLNEMEIQLNHANR           | K | M | 95.00% | 36  | M9: Oxidation                                       | 540.2574  | 4 | 1.8 | 1623 | 1640 | Yes |
| KMEGDLNEMEIQLNHANR           | K | M | 95.00% | 115 |                                                     | 1071.5170 | 2 | 8.7 | 1623 | 1640 | Yes |
| KMEGDLNEMEIQLNHANR           | K | M | 95.00% | 89  |                                                     | 714.6783  | 3 | 5.6 | 1623 | 1640 | Yes |
| KMEGDLNEMEIQLNHANR           | K | M | 95.00% | 59  |                                                     | 536.2598  | 4 | 4.0 | 1623 | 1640 | Yes |
| KRQEAPPHIFSISDNAYQFMLTD<br>R | K | E | 95.00% | 89  | M20: Oxidation                                      | 960.8171  | 3 | 8.9 | 147  | 170  | Yes |
| KRQEAPPHIFSISDNAYQFMLTD<br>R | K | E | 95.00% | 97  |                                                     | 955.4839  | 3 | 7.2 | 147  | 170  | Yes |
| LAQESIMDIENEK                | K | Q | 95.00% | 105 | M7: Oxidation                                       | 768.3721  | 2 | 6.5 | 1067 | 1079 | No  |
| LAQESIMDIENEK                | K | Q | 95.00% | 95  |                                                     | 760.3719  | 2 | 3.0 | 1067 | 1079 | No  |
| LAQESIMDIENEKQQLDEK          | K | L | 95.00% | 95  | M7: Oxidation                                       | 1139.0580 | 2 | 7.1 | 1067 | 1085 | No  |
| LAQESIMDIENEKQQLDEK          | K | L | 95.00% | 66  | M7: Oxidation                                       | 759.7066  | 3 | 5.4 | 1067 | 1085 | No  |
| LAQESIMDIENEKQQLDEK          | K | L | 95.00% | 97  |                                                     | 1131.0620 | 2 | 8.2 | 1067 | 1085 | No  |
| LAQESIMDIENEKQQLDEK          | K | L | 95.00% | 61  |                                                     | 754.3740  | 3 | 4.1 | 1067 | 1085 | No  |
| LAQESIMDIENEKQQLDEK          | K | K | 95.00% | 36  | M7: Oxidation                                       | 840.1025  | 3 | 8.3 | 1067 | 1087 | No  |
| LAQLITR                      | K | T | 95.00% | 37  |                                                     | 814.5181  | 1 | 3.6 | 787  | 793  | Yes |

|                      |   |   |        |     |                                                     |           |   |      |      |      |     |
|----------------------|---|---|--------|-----|-----------------------------------------------------|-----------|---|------|------|------|-----|
| LAQLITR              | K | T | 95.00% | 59  |                                                     | 407.7621  | 2 | 1.4  | 787  | 793  | Yes |
| LASADIETYLLEK        | K | S | 95.00% | 129 |                                                     | 733.3926  | 2 | -1.2 | 261  | 273  | Yes |
| LASADIETYLLEK        | K | S | 95.00% | 66  |                                                     | 489.2671  | 3 | 4.5  | 261  | 273  | Yes |
| LDEAEQLALK           | R | G | 95.00% | 51  |                                                     | 1129.6220 | 1 | 9.6  | 1803 | 1812 | Yes |
| LDEAEQLALK           | R | G | 95.00% | 97  |                                                     | 565.3107  | 2 | 2.5  | 1803 | 1812 | Yes |
| LDEAEQLALKGGK        | R | K | 95.00% | 66  |                                                     | 686.3813  | 2 | 4.5  | 1803 | 1815 | Yes |
| LDEAEQLALKGGK        | R | K | 95.00% | 42  |                                                     | 457.9226  | 3 | 2.6  | 1803 | 1815 | Yes |
| LDEAEQLALKGGKK       | R | Q | 95.00% | 81  |                                                     | 750.4314  | 2 | 7.6  | 1803 | 1816 | Yes |
| LDEAEQLALKGGKK       | R | Q | 95.00% | 45  |                                                     | 500.6212  | 3 | 2.9  | 1803 | 1816 | Yes |
| LEEAGGATSAQIEMNK     | R | K | 95.00% | 157 | M14: Oxidation                                      | 832.8970  | 2 | 3.6  | 1156 | 1171 | Yes |
| LEEAGGATSAQIEMNK     | R | K | 95.00% | 68  | M14: Oxidation                                      | 555.6020  | 3 | 6.1  | 1156 | 1171 | Yes |
| LEEAGGATSAQIEMNK     | R | K | 95.00% | 134 |                                                     | 824.8989  | 2 | 2.7  | 1156 | 1171 | Yes |
| LEEAGGATSAQIEMNKK    | R | R | 95.00% | 88  | M14: Oxidation                                      | 896.9449  | 2 | 3.7  | 1156 | 1172 | Yes |
| LEEAGGATSAQIEMNKK    | R | R | 95.00% | 37  | M14: Oxidation                                      | 598.2982  | 3 | 2.0  | 1156 | 1172 | Yes |
| LEEAGGATSAQIEMNKK    | R | R | 95.00% | 105 |                                                     | 888.9479  | 2 | 4.3  | 1156 | 1172 | Yes |
| LEQQVDDLEGSLEQEK     | K | K | 95.00% | 144 |                                                     | 930.4526  | 2 | 5.2  | 1033 | 1048 | Yes |
| LEQQVDDLEGSLEQEK     | K | K | 95.00% | 113 |                                                     | 620.6381  | 3 | 5.9  | 1033 | 1048 | Yes |
| LEQQVDDLEGSLEQEKK    | K | L | 95.00% | 116 |                                                     | 994.5015  | 2 | 6.3  | 1033 | 1049 | Yes |
| LEQQVDDLEGSLEQEKK    | K | L | 95.00% | 69  |                                                     | 663.3355  | 3 | 4.1  | 1033 | 1049 | Yes |
| LETDISQMQGEMEDILQEAR | K | N | 95.00% | 36  | M12: Oxidation                                      | 784.6980  | 3 | 3.4  | 1736 | 1755 | No  |
| LETDISQMQGEMEDILQEAR | K | N | 95.00% | 68  | M8: Oxidation,<br>M12: Oxidation,<br>M8: Oxidation, | 1184.5460 | 2 | 8.1  | 1736 | 1755 | No  |
| LETDISQMQGEMEDILQEAR | K | N | 95.00% | 55  | M12: Oxidation                                      | 790.0312  | 3 | 5.4  | 1736 | 1755 | No  |
| LETDISQMQGEMEDILQEAR | K | N | 95.00% | 135 |                                                     | 1168.5530 | 2 | 9.7  | 1736 | 1755 | No  |
| LETDISQMQGEMEDILQEAR | K | N | 95.00% | 45  |                                                     | 779.3713  | 3 | 9.7  | 1736 | 1755 | No  |
| LINDLTAQR            | R | G | 95.00% | 51  |                                                     | 1043.5890 | 1 | 3.4  | 1275 | 1283 | No  |
| LINDLTAQR            | R | G | 95.00% | 89  |                                                     | 522.2970  | 2 | 1.1  | 1275 | 1283 | No  |
| LQAAEEHVAVNAK        | R | C | 95.00% | 118 |                                                     | 754.8915  | 2 | 2.8  | 1403 | 1416 | No  |
| LQAAEEHVAVNAK        | R | C | 95.00% | 48  |                                                     | 503.5963  | 3 | 1.6  | 1403 | 1416 | No  |
| LQDLVDK              | R | L | 95.00% | 35  |                                                     | 830.4684  | 1 | 7.0  | 1870 | 1876 | Yes |
| LQDLVDK              | R | L | 95.00% | 42  |                                                     | 415.7369  | 2 | 4.1  | 1870 | 1876 | Yes |
| LQDLVDKLAQK          | R | V | 95.00% | 88  |                                                     | 635.8749  | 2 | 3.6  | 1870 | 1880 | Yes |
| LQDLVDKLAQK          | R | V | 95.00% | 55  |                                                     | 424.2524  | 3 | 3.4  | 1870 | 1880 | Yes |
| LQHELEEAER           | K | A | 95.00% | 69  |                                                     | 691.8343  | 2 | 4.1  | 1905 | 1915 | Yes |
| LQHELEEAER           | K | A | 95.00% | 59  |                                                     | 461.5593  | 3 | 5.1  | 1905 | 1915 | Yes |
| LQHELEEAERADIAESQVNK | K | L | 95.00% | 114 |                                                     | 1219.6040 | 2 | 8.0  | 1905 | 1925 | Yes |
| LQHELEEAERADIAESQVNK | K | L | 95.00% | 59  |                                                     | 813.4023  | 3 | 4.6  | 1905 | 1925 | Yes |
| LQHELEEAERADIAESQVNK | K | L | 95.00% | 59  |                                                     | 610.3048  | 4 | 6.5  | 1905 | 1925 | Yes |
| LQNEVEDMLDVER        | R | T | 95.00% | 122 | M9: Oxidation                                       | 859.9229  | 2 | 6.3  | 1427 | 1440 | No  |
| LQNEVEDMLDVER        | R | T | 95.00% | 86  | M9: Oxidation                                       | 573.6165  | 3 | 3.8  | 1427 | 1440 | No  |
| LQNEVEDMLDVER        | R | T | 95.00% | 115 |                                                     | 851.9251  | 2 | 5.9  | 1427 | 1440 | No  |
| LQNEVEDMLDVER        | R | T | 95.00% | 75  |                                                     | 568.2850  | 3 | 4.2  | 1427 | 1440 | No  |
| LQQFFNHMFVLEQEEYK    | K | K | 95.00% | 58  | M9: Oxidation                                       | 795.0480  | 3 | 4.4  | 488  | 505  | Yes |
| LQQFFNHMFVLEQEEYK    | K | K | 95.00% | 35  | M9: Oxidation                                       | 596.5412  | 4 | 9.8  | 488  | 505  | Yes |
| LQQFFNHMFVLEQEEYK    | K | K | 95.00% | 43  |                                                     | 789.7178  | 3 | 6.2  | 488  | 505  | Yes |
| LQQFFNHMFVLEQEEYK    | K | K | 95.00% | 42  |                                                     | 592.5402  | 4 | 6.1  | 488  | 505  | Yes |
| LQQFFNHMFVLEQEEYK    | K | E | 95.00% | 68  | M9: Oxidation                                       | 1256.1180 | 2 | 5.7  | 488  | 506  | Yes |
| LQQFFNHMFVLEQEEYK    | K | E | 95.00% | 51  | M9: Oxidation                                       | 837.7500  | 3 | 8.6  | 488  | 506  | Yes |
| LQQFFNHMFVLEQEEYK    | K | E | 95.00% | 103 |                                                     | 1248.1230 | 2 | 8.3  | 488  | 506  | Yes |
| LQQFFNHMFVLEQEEYK    | K | E | 95.00% | 57  |                                                     | 832.4158  | 3 | 5.6  | 488  | 506  | Yes |
| LQQFFNHMFVLEQEEYK    | K | E | 95.00% | 42  |                                                     | 499.8525  | 5 | 5.4  | 488  | 506  | Yes |
| LOTESGEFSR           | R | Q | 95.00% | 59  |                                                     | 1153.5580 | 1 | 7.4  | 1286 | 1295 | No  |
| LOTESGEFSR           | R | Q | 95.00% | 77  |                                                     | 577.2810  | 2 | 4.4  | 1286 | 1295 | No  |
| LTGAVMHYGNLK         | K | F | 95.00% | 81  | M6: Oxidation                                       | 660.3458  | 2 | 4.2  | 355  | 366  | No  |
| LTGAVMHYGNLK         | K | F | 95.00% | 36  | M6: Oxidation                                       | 440.5658  | 3 | 2.8  | 355  | 366  | No  |
| LTGAVMHYGNLK         | K | F | 95.00% | 85  |                                                     | 652.3475  | 2 | 2.9  | 355  | 366  | No  |
| LYDQHLGK             | K | S | 95.00% | 55  |                                                     | 487.2609  | 2 | 3.1  | 555  | 562  | Yes |
| MEGDLNEMEIQLNHANR    | K | M | 95.00% | 108 | M1: Oxidation                                       | 1015.4620 | 2 | 4.8  | 1624 | 1640 | Yes |
| MEGDLNEMEIQLNHANR    | K | M | 95.00% | 73  | M1: Oxidation                                       | 677.3097  | 3 | 3.1  | 1624 | 1640 | Yes |
| MEGDLNEMEIQLNHANR    | K | M | 95.00% | 98  | M1: Oxidation                                       | 1023.4620 | 2 | 6.9  | 1624 | 1640 | Yes |
| MEGDLNEMEIQLNHANR    | K | M | 95.00% | 71  | M1: Oxidation                                       | 682.6416  | 3 | 3.5  | 1624 | 1640 | Yes |
| MEGDLNEMEIQLNHANR    | K | M | 95.00% | 98  | M1: Oxidation, M8:<br>Oxidation, M8:                | 1023.4620 | 2 | 6.9  | 1624 | 1640 | Yes |
| MEGDLNEMEIQLNHANR    | K | M | 95.00% | 71  | Oxidation                                           | 682.6416  | 3 | 3.5  | 1624 | 1640 | Yes |
| MEGDLNEMEIQLNHANR    | K | M | 95.00% | 90  | M8: Oxidation                                       | 1015.4650 | 2 | 7.0  | 1624 | 1640 | Yes |
| MEGDLNEMEIQLNHANR    | K | M | 95.00% | 49  | M8: Oxidation                                       | 677.3115  | 3 | 5.7  | 1624 | 1640 | Yes |
| MEGDLNEMEIQLNHANR    | K | M | 95.00% | 124 |                                                     | 1007.4680 | 2 | 8.1  | 1624 | 1640 | Yes |
| MEGDLNEMEIQLNHANR    | K | M | 95.00% | 77  |                                                     | 671.9785  | 3 | 3.8  | 1624 | 1640 | Yes |

|                        |   |   |        |     |                              |           |   |      |      |      |     |
|------------------------|---|---|--------|-----|------------------------------|-----------|---|------|------|------|-----|
| MEIDDLASNVETVSK        | K | A | 95.00% | 137 | M1: Oxidation                | 833.8993  | 2 | 3.7  | 1232 | 1246 | No  |
| MEIDDLASNVETVSK        | K | A | 95.00% | 73  | M1: Oxidation                | 556.2673  | 3 | 1.0  | 1232 | 1246 | No  |
| MEIDDLASNVETVSK        | K | A | 95.00% | 150 |                              | 825.9019  | 2 | 3.7  | 1232 | 1246 | No  |
| MEIDDLASNVETVSK        | K | A | 95.00% | 51  |                              | 550.9376  | 3 | 4.5  | 1232 | 1246 | No  |
| MFLWMVAR               | K | I | 95.00% | 44  | M1: Oxidation                | 535.2735  | 2 | 6.0  | 438  | 445  | No  |
| MFLWMVAR               | K | I | 95.00% | 60  | M1: Oxidation                | 543.2704  | 2 | 4.9  | 438  | 445  | No  |
|                        |   |   |        |     | M1: Oxidation, M5: Oxidation | 543.2704  | 2 | 4.9  | 438  | 445  | No  |
| MFLWMVAR               | K | I | 95.00% | 60  |                              | 535.2723  | 2 | 3.9  | 438  | 445  | No  |
| MFLWMVAR               | K | I | 95.00% | 54  | M5: Oxidation                | 527.2748  | 2 | 3.8  | 438  | 445  | No  |
| MFLWMVAR               | K | I | 95.00% | 54  |                              | 720.4358  | 1 | 3.7  | 883  | 888  | No  |
| MVTLLK                 | K | E | 95.00% | 27  | M1: Oxidation                | 704.4404  | 1 | 3.2  | 883  | 888  | Yes |
| MVTLLK                 | K | E | 95.00% | 37  |                              | 1167.6270 | 1 | 3.0  | 1333 | 1343 | Yes |
| NALAHALQSSR            | K | H | 95.00% | 52  |                              | 584.3176  | 2 | 3.3  | 1333 | 1343 | Yes |
| NALAHALQSSR            | K | H | 95.00% | 94  |                              | 826.9099  | 2 | 6.0  | 1492 | 1505 | Yes |
| NAYEESLDQLETLK         | K | R | 95.00% | 111 |                              | 551.6096  | 3 | 6.6  | 1492 | 1505 | Yes |
| NAYEESLDQLETLK         | K | R | 95.00% | 61  |                              | 904.9635  | 2 | 8.8  | 1492 | 1506 | Yes |
| NAYEESLDQLETLK         | K | E | 95.00% | 138 |                              | 603.6429  | 3 | 5.5  | 1492 | 1506 | Yes |
| NAYEESLDQLETLK         | K | E | 95.00% | 53  |                              | 1100.0410 | 2 | 9.5  | 891  | 910  | No  |
| NDLQLQVQAEAEGLADAEER   | K | C | 95.00% | 159 |                              | 733.6920  | 3 | 3.2  | 891  | 910  | No  |
| NDLQLQVQAEAEGLADAEER   | K | C | 95.00% | 63  |                              | 632.3444  | 2 | 5.5  | 1454 | 1463 | Yes |
| NFDKILAEWK             | R | Q | 95.00% | 40  |                              | 421.8982  | 3 | 4.0  | 1454 | 1463 | Yes |
| NFDKILAEWK             | R | Q | 95.00% | 30  |                              | 859.4654  | 2 | 6.0  | 600  | 614  | Yes |
| NKDPPLNETVVGLYQK       | K | S | 95.00% | 121 |                              | 573.3107  | 3 | 2.1  | 600  | 614  | Yes |
| NKDPPLNETVVGLYQK       | K | S | 95.00% | 75  |                              | 987.0017  | 2 | 6.4  | 1510 | 1527 | Yes |
| NLQQEISDLTEQIAEGGK     | K | R | 95.00% | 163 |                              | 658.3360  | 3 | 4.8  | 1510 | 1527 | Yes |
| NLQQEISDLTEQIAEGGK     | K | R | 95.00% | 98  |                              | 1065.0560 | 2 | 9.5  | 1510 | 1528 | Yes |
| NLQQEISDLTEQIAEGGK     | K | I | 95.00% | 145 |                              | 710.3688  | 3 | 3.2  | 1510 | 1528 | Yes |
| NLQQEISDLTEQIAEGGK     | K | I | 95.00% | 53  |                              | 533.0291  | 4 | 4.1  | 1510 | 1528 | Yes |
| NLQQEISDLTEQIAEGGK     | K | I | 95.00% | 75  |                              | 825.9053  | 2 | 7.8  | 983  | 997  | Yes |
| NLTEEMAGLDETIK         | K | L | 95.00% | 124 | M6: Oxidation                | 550.9387  | 3 | 6.4  | 983  | 997  | Yes |
| NLTEEMAGLDETIK         | K | L | 95.00% | 71  | M6: Oxidation                | 817.9079  | 2 | 7.9  | 983  | 997  | Yes |
| NLTEEMAGLDETIK         | K | L | 95.00% | 131 |                              | 545.6058  | 3 | 4.2  | 983  | 997  | Yes |
| NLTEEMAGLDETIK         | K | L | 95.00% | 77  |                              | 433.2104  | 2 | 4.5  | 1791 | 1797 | No  |
| NMEQTVK                | K | D | 95.00% | 36  | M2: Oxidation                | 425.2119  | 2 | 2.2  | 1791 | 1797 | No  |
| NMEQTVK                | K | D | 95.00% | 34  |                              | 773.4569  | 1 | 5.9  | 1651 | 1657 | No  |
| NTQGILK                | R | D | 95.00% | 34  |                              | 1026.0540 | 2 | 5.0  | 1651 | 1668 | No  |
| NTQGILKDTQIHDDALR      | R | S | 95.00% | 97  |                              | 684.3727  | 3 | 6.7  | 1651 | 1668 | No  |
| NTQGILKDTQIHDDALR      | R | S | 95.00% | 59  |                              | 831.3815  | 2 | -4.0 | 1887 | 1901 | No  |
| QAEAEAEQSNNTLAK        | R | F | 95.00% | 100 |                              | 554.5954  | 3 | 5.3  | 1887 | 1901 | No  |
| QAEAEAEQSNNTLAK        | R | F | 95.00% | 59  |                              | 667.8544  | 2 | 3.8  | 1312 | 1322 | Yes |
| QAFTQIEELK             | K | R | 95.00% | 37  |                              | 745.9052  | 2 | 3.8  | 1312 | 1323 | Yes |
| QAFTQIEELK             | K | Q | 95.00% | 90  |                              | 497.6067  | 3 | 5.1  | 1312 | 1323 | Yes |
| QAFTQIEELK             | K | Q | 95.00% | 61  |                              | 866.0826  | 3 | 7.0  | 149  | 170  | Yes |
| QEAPPHFISIDNAYQFMLTDR  | R | E | 95.00% | 103 | M18: Oxidation               | 860.7453  | 3 | 0.4  | 149  | 170  | Yes |
| QEAPPHFISIDNAYQFMLTDR  | R | E | 95.00% | 81  |                              | 686.6686  | 3 | 7.7  | 369  | 386  | Yes |
| QKQREEQAEPDGTEVADK     | K | A | 95.00% | 33  |                              | 808.4416  | 2 | 6.0  | 1296 | 1309 | No  |
| QLDEKEALVQSLR          | R | G | 95.00% | 101 |                              | 539.2956  | 3 | 3.3  | 1296 | 1309 | No  |
| QLDEKEALVQSLR          | R | G | 95.00% | 67  |                              | 444.7393  | 2 | 3.2  | 1324 | 1330 | Yes |
| QLEEEIK                | R | A | 95.00% | 50  |                              | 901.4207  | 2 | 7.2  | 371  | 386  | Yes |
| QREEQAEPDGTEVADK       | K | A | 95.00% | 104 |                              | 601.2809  | 3 | 3.6  | 371  | 386  | Yes |
| QREEQAEPDGTEVADK       | K | A | 95.00% | 62  |                              | 1097.2200 | 3 | 7.7  | 371  | 400  | Yes |
| QREEQAEPDGTEVADKAAYLQS | K | A | 95.00% | 96  |                              | 668.3357  | 3 | 2.3  | 1425 | 1440 | No  |
| LNSADLLK               | K | A | 95.00% | 96  | M11: Oxidation               | 663.0079  | 3 | 8.0  | 1425 | 1440 | No  |
| QRLQNEVEDLMLDVER       | K | T | 95.00% | 44  |                              |           |   |      |      |      |     |
| QRLQNEVEDLMLDVER       | K | T | 95.00% | 64  |                              |           |   |      |      |      |     |
| QVEQEKCELQAALEAEASLEH  | K | I | 95.00% | 90  |                              | 976.4582  | 3 | 0.4  | 1538 | 1563 | No  |
| EEGK                   | K | I | 95.00% | 90  |                              | 777.9383  | 2 | 5.3  | 1683 | 1695 | Yes |
| RANLLQAEIEELR          | R | A | 95.00% | 86  |                              | 518.9605  | 3 | 3.5  | 1683 | 1695 | Yes |
| RANLLQAEIEELR          | R | A | 95.00% | 90  |                              | 828.4529  | 3 | 8.5  | 1683 | 1703 | Yes |
| RANLLQAEIEELRATLEQTER  | R | S | 95.00% | 41  |                              | 621.5908  | 4 | 7.2  | 1683 | 1703 | Yes |
| RANLLQAEIEELRATLEQTER  | R | S | 95.00% | 79  |                              | 1013.0270 | 2 | 4.5  | 1182 | 1199 | Yes |
| RDLEEAATLOHEATAATLR    | R | K | 95.00% | 113 |                              | 675.6859  | 3 | 2.7  | 1182 | 1199 | Yes |
| RDLEEAATLOHEATAATLR    | R | K | 95.00% | 81  |                              | 507.0161  | 4 | 2.1  | 1182 | 1199 | Yes |
| RDLEEAATLOHEATAATLR    | R | K | 95.00% | 61  |                              | 539.0399  | 4 | 2.2  | 1182 | 1200 | Yes |
| RDLEEAATLOHEATAATLRK   | R | K | 95.00% | 41  |                              | 909.4431  | 2 | 8.5  | 1886 | 1901 | No  |
| RQAEAEAEQSNNTLAK       | K | F | 95.00% | 68  |                              | 606.6308  | 3 | 7.6  | 1886 | 1901 | No  |
| RQAEAEAEQSNNTLAK       | K | F | 95.00% | 45  |                              |           |   |      |      |      |     |
| RQAEAEAEQSNNTLAK       | K | F | 95.00% | 45  |                              |           |   |      |      |      |     |
| ROEAPPHFISIDNAYQFMLTDR | K | E | 95.00% | 106 | M19: Oxidation               | 918.1165  | 3 | 6.7  | 148  | 170  | Yes |

|                                |   |   |        |     |                                                    |           |   |      |      |      |     |
|--------------------------------|---|---|--------|-----|----------------------------------------------------|-----------|---|------|------|------|-----|
| RQEAPPHIFISIDNAYQFMLTDR        | K | E | 95.00% | 34  | M19: Oxidation                                     | 688.8396  | 4 | 7.2  | 148  | 170  | Yes |
| RQEAPPHIFISIDNAYQFMLTDR        | K | E | 95.00% | 114 |                                                    | 912.7863  | 3 | 8.4  | 148  | 170  | Yes |
| RQEAPPHIFISIDNAYQFMLTDR        |   |   |        |     |                                                    |           |   |      |      |      |     |
| ENQSILITGESGAGK                | K | T | 95.00% | 70  | M19: Oxidation                                     | 1060.0320 | 4 | 9.5  | 148  | 185  | Yes |
| RVIQYFATIAVTGEK                | K | K | 95.00% | 106 |                                                    | 848.4809  | 2 | 6.2  | 191  | 205  | Yes |
| RVIQYFATIAVTGEK                | K | K | 95.00% | 71  |                                                    | 565.9888  | 3 | 4.3  | 191  | 205  | Yes |
| SAETEKEMATMK                   | K | E | 95.00% | 40  | M11: Oxidation                                     | 686.3135  | 2 | 4.0  | 848  | 859  | Yes |
| SAETEKEMATMK                   | K | E | 95.00% | 34  | M11: Oxidation<br>M8: Oxidation,                   | 457.8794  | 3 | 6.5  | 848  | 859  | Yes |
| SAETEKEMATMK                   | K | E | 95.00% | 37  | M11: Oxidation                                     | 694.3143  | 2 | 8.8  | 848  | 859  | Yes |
| SAETEKEMATMK                   | K | E | 95.00% | 68  |                                                    | 678.3158  | 2 | 3.6  | 848  | 859  | Yes |
| SAETEKEMATMK                   | K | E | 95.00% | 41  |                                                    | 452.5479  | 3 | 6.8  | 848  | 859  | Yes |
| SAETEKEMATMKKEEFQK             | K | I | 95.00% | 83  | M11: Oxidation                                     | 1016.9680 | 2 | 4.0  | 848  | 864  | No  |
| SAETEKEMATMKKEEFQK             | K | I | 95.00% | 47  | M11: Oxidation                                     | 678.3137  | 3 | 2.3  | 848  | 864  | No  |
| SAETEKEMATMKKEEFQK             | K | I | 95.00% | 75  | M8: Oxidation                                      | 1016.9690 | 2 | 4.3  | 848  | 864  | No  |
| SAETEKEMATMKKEEFQK             | K | I | 95.00% | 33  | M8: Oxidation                                      | 678.3148  | 3 | 3.8  | 848  | 864  | No  |
| SAETEKEMATMKKEEFQK             | K | I | 95.00% | 75  | M8: Oxidation                                      | 1024.9670 | 2 | 5.5  | 848  | 864  | No  |
| SAETEKEMATMKKEEFQK             | K | I | 95.00% | 51  | M8: Oxidation                                      | 683.6451  | 3 | 1.9  | 848  | 864  | No  |
| SAETEKEMATMKKEEFQK             | K | I | 95.00% | 75  | M8: Oxidation,<br>M11: Oxidation<br>M8: Oxidation, | 1024.9670 | 2 | 5.5  | 848  | 864  | No  |
| SAETEKEMATMKKEEFQK             | K | I | 95.00% | 51  | M11: Oxidation                                     | 683.6451  | 3 | 1.9  | 848  | 864  | No  |
| SAETEKEMATMKKEEFQK             | K | I | 95.00% | 96  |                                                    | 1008.9730 | 2 | 6.2  | 848  | 864  | No  |
| SAETEKEMATMKKEEFQK             | K | I | 95.00% | 53  |                                                    | 672.9824  | 3 | 2.8  | 848  | 864  | No  |
| SAMKTLAQLFSGAQTAELEGAG<br>GGAK | K | K | 95.00% | 94  | M3: Oxidation                                      | 818.7440  | 3 | 9.3  | 615  | 640  | No  |
| SANFQPKPK                      | K | V | 95.00% | 43  |                                                    | 460.2563  | 2 | 4.9  | 563  | 570  | Yes |
| SEMKMEIDDLASNVETVSK            | K | A | 95.00% | 41  | M3: Oxidation                                      | 714.6738  | 3 | 5.2  | 1228 | 1246 | No  |
| SEMKMEIDDLASNVETVSK            | K | A | 95.00% | 129 | M3: Oxidation                                      | 1079.5080 | 2 | 8.4  | 1228 | 1246 | No  |
| SEMKMEIDDLASNVETVSK            | K | A | 95.00% | 77  | M3: Oxidation                                      | 720.0056  | 3 | 5.4  | 1228 | 1246 | No  |
| SEMKMEIDDLASNVETVSK            | K | A | 95.00% | 129 | M3: Oxidation, M5:<br>Oxidation                    | 1079.5080 | 2 | 8.4  | 1228 | 1246 | No  |
| SEMKMEIDDLASNVETVSK            | K | A | 95.00% | 86  | M3: Oxidation, M5:<br>Oxidation                    | 720.0066  | 3 | 6.9  | 1228 | 1246 | No  |
| SEMKMEIDDLASNVETVSK            | K | A | 95.00% | 102 | M5: Oxidation                                      | 1071.5100 | 2 | 8.3  | 1228 | 1246 | No  |
| SEMKMEIDDLASNVETVSK            | K | A | 95.00% | 52  | M5: Oxidation                                      | 714.6751  | 3 | 7.1  | 1228 | 1246 | No  |
| SKEEEEQR                       | K | L | 95.00% | 51  |                                                    | 517.2525  | 2 | 5.4  | 1267 | 1274 | No  |
| SLGTELFK                       | R | I | 95.00% | 34  |                                                    | 894.4965  | 1 | 3.1  | 1482 | 1489 | No  |
| SLGTELFK                       | R | I | 95.00% | 73  |                                                    | 447.7524  | 2 | 3.6  | 1482 | 1489 | No  |
| SOEDLKEQLAMVER                 | R | R | 95.00% | 98  | M11: Oxidation                                     | 846.4202  | 2 | 3.0  | 1669 | 1682 | Yes |
| SOEDLKEQLAMVER                 | R | R | 95.00% | 65  | M11: Oxidation                                     | 564.6167  | 3 | 4.1  | 1669 | 1682 | Yes |
| SOEDLKEQLAMVER                 | R | R | 95.00% | 117 |                                                    | 838.4244  | 2 | 5.0  | 1669 | 1682 | Yes |
| SOEDLKEQLAMVER                 | R | R | 95.00% | 65  |                                                    | 559.2847  | 3 | 3.5  | 1669 | 1682 | Yes |
| STHPHFVR                       | R | C | 95.00% | 32  |                                                    | 490.7590  | 2 | 3.7  | 670  | 677  | Yes |
| SYHIFYQITSNK                   | R | K | 95.00% | 87  |                                                    | 750.8779  | 2 | -0.5 | 285  | 296  | Yes |
| SYHIFYQITSNK                   | R | K | 95.00% | 43  |                                                    | 500.9233  | 3 | 3.7  | 285  | 296  | Yes |
| TEELEEA                        | R | K | 95.00% | 33  |                                                    | 948.4558  | 1 | 3.3  | 1389 | 1396 | Yes |
| TEELEEA                        | R | K | 95.00% | 39  |                                                    | 474.7330  | 2 | 5.9  | 1389 | 1396 | Yes |
| TEELEEA                        | R | K | 95.00% | 40  |                                                    | 538.7797  | 2 | 3.5  | 1389 | 1397 | Yes |
| TEEGATLVK                      | K | D | 95.00% | 54  |                                                    | 488.7739  | 2 | 8.4  | 64   | 73   | No  |
| TEGGATLVKDDQVFPMPNPK           | K | Y | 95.00% | 79  | M17: Oxidation                                     | 1131.0700 | 2 | 8.4  | 64   | 84   | No  |
| TEGGATLVKDDQVFPMPNPK           | K | Y | 95.00% | 91  | M17: Oxidation                                     | 754.3829  | 3 | 9.0  | 64   | 84   | No  |
| TEGGATLVKDDQVFPMPNPK           | K | Y | 95.00% | 96  |                                                    | 1123.0720 | 2 | 7.7  | 64   | 84   | No  |
| TEGGATLVKDDQVFPMPNPK           | K | Y | 95.00% | 79  |                                                    | 749.0500  | 3 | 7.4  | 64   | 84   | No  |
| TEGGATLVKDDQVFPMPNPKY<br>DK    | K | I | 95.00% | 67  | M17: Oxidation                                     | 889.7742  | 3 | 3.3  | 64   | 87   | No  |
| TEGGATLVKDDQVFPMPNPKY<br>DK    | K | I | 95.00% | 51  |                                                    | 884.4431  | 3 | 4.0  | 64   | 87   | No  |
| TKYETDAIQR                     | R | T | 95.00% | 69  |                                                    | 612.8171  | 2 | 3.2  | 1379 | 1388 | Yes |
| TKYETDAIQR                     | R | T | 95.00% | 55  |                                                    | 408.8806  | 3 | 3.1  | 1379 | 1388 | Yes |
| TKYETDAIQRTEELEEA              | R | K | 95.00% | 74  |                                                    | 1077.5420 | 2 | 8.6  | 1379 | 1396 | Yes |
| TKYETDAIQRTEELEEA              | R | K | 95.00% | 38  |                                                    | 718.6949  | 3 | 5.7  | 1379 | 1396 | Yes |
| TKYETDAIQRTEELEEA              | R | K | 95.00% | 31  |                                                    | 539.2729  | 4 | 5.3  | 1379 | 1396 | Yes |
| TLAQLFSGAQTAELEGAGGGAK         | K | K | 95.00% | 170 |                                                    | 1011.0050 | 2 | 3.9  | 619  | 640  | No  |
| TLAQLFSGAQTAELEGAGGGAK         | K | K | 95.00% | 109 |                                                    | 674.3394  | 3 | 4.1  | 619  | 640  | No  |

|                        |   |   |        |     |                                                    |           |   |     |      |      |     |  |
|------------------------|---|---|--------|-----|----------------------------------------------------|-----------|---|-----|------|------|-----|--|
| TLAQLFSGAQTAELEGAGGGAK |   |   |        |     |                                                    |           |   |     |      |      |     |  |
| K                      | K | G | 95.00% | 41  |                                                    | 717.0399  | 3 | 6.9 | 619  | 641  | No  |  |
| TLEDQLSELK             | R | S | 95.00% | 44  |                                                    | 1175.6260 | 1 | 8.0 | 1257 | 1266 | No  |  |
| TLEDQLSELK             | R | S | 95.00% | 72  |                                                    | 588.3142  | 2 | 3.7 | 1257 | 1266 | No  |  |
| TLEDQLSELKSKEEQQR      | R | L | 95.00% | 60  |                                                    | 730.7078  | 3 | 8.5 | 1257 | 1274 | No  |  |
| TNAACAALDKK            | R | Q | 95.00% | 39  |                                                    | 553.2895  | 2 | 3.1 | 1441 | 1451 | Yes |  |
| TPGAMEHELVLHQLR        | K | C | 95.00% | 68  | M5: Oxidation                                      | 873.9575  | 2 | 6.3 | 686  | 700  | Yes |  |
| TPGAMEHELVLHQLR        | K | C | 95.00% | 75  | M5: Oxidation                                      | 582.9732  | 3 | 4.5 | 686  | 700  | Yes |  |
| TPGAMEHELVLHQLR        | K | C | 95.00% | 35  | M5: Oxidation                                      | 437.4808  | 4 | 2.1 | 686  | 700  | Yes |  |
| TPGAMEHELVLHQLR        | K | C | 95.00% | 109 |                                                    | 865.9571  | 2 | 2.9 | 686  | 700  | Yes |  |
| TPGAMEHELVLHQLR        | K | C | 95.00% | 77  |                                                    | 577.6414  | 3 | 4.2 | 686  | 700  | Yes |  |
| TPGAMEHELVLHQLR        | K | C | 95.00% | 45  |                                                    | 433.4824  | 4 | 2.8 | 686  | 700  | Yes |  |
| TSVFVAEPK              | K | E | 95.00% | 36  |                                                    | 977.5336  | 1 | 2.9 | 36   | 44   | Yes |  |
| TSVFVAEPK              | K | E | 95.00% | 71  |                                                    | 489.2706  | 2 | 2.6 | 36   | 44   | Yes |  |
| TVNTRVIQYFATIAVTGEK    | K | K | 95.00% | 35  |                                                    | 747.0939  | 3 | 9.4 | 186  | 205  | Yes |  |
| VGNEYVTK               | K | G | 95.00% | 69  |                                                    | 455.2391  | 2 | 2.3 | 409  | 416  | Yes |  |
| VIQYFATIAVTGEK         | R | K | 95.00% | 132 |                                                    | 770.4273  | 2 | 2.9 | 192  | 205  | Yes |  |
| VIQYFATIAVTGEK         | R | K | 95.00% | 82  |                                                    | 513.9557  | 3 | 6.0 | 192  | 205  | Yes |  |
| VKELTYQTEEDRK          | R | K | 95.00% | 71  |                                                    | 755.8765  | 2 | 4.1 | 1853 | 1864 | No  |  |
| VKELTYQTEEDRK          | R | N | 95.00% | 86  |                                                    | 819.9239  | 2 | 3.7 | 1853 | 1865 | Yes |  |
| VKELTYQTEEDRK          | R | N | 95.00% | 58  |                                                    | 546.9517  | 3 | 3.3 | 1853 | 1865 | Yes |  |
| VKELTYQTEEDRK          | R | N | 95.00% | 40  |                                                    | 410.4650  | 4 | 1.6 | 1853 | 1865 | Yes |  |
| VKNLTEEMAGLDETIAK      | K | L | 95.00% | 107 | M8: Oxidation                                      | 939.4888  | 2 | 8.8 | 981  | 997  | Yes |  |
| VKNLTEEMAGLDETIAK      | K | L | 95.00% | 57  | M8: Oxidation                                      | 626.6605  | 3 | 6.7 | 981  | 997  | Yes |  |
| VKNLTEEMAGLDETIAK      | K | L | 95.00% | 140 |                                                    | 931.4891  | 2 | 6.4 | 981  | 997  | Yes |  |
| VKNLTEEMAGLDETIAK      | K | L | 95.00% | 63  |                                                    | 621.3273  | 3 | 4.2 | 981  | 997  | Yes |  |
| VKVGNEYVTK             | R | G | 95.00% | 59  |                                                    | 568.8224  | 2 | 4.7 | 407  | 416  | Yes |  |
| VLNAsAIPeGQFIDSK       | K | K | 95.00% | 115 |                                                    | 844.9546  | 2 | 9.1 | 730  | 745  | Yes |  |
| VLNAsAIPeGQFIDSK       | K | K | 95.00% | 76  |                                                    | 563.6365  | 3 | 4.6 | 730  | 745  | Yes |  |
| VLNAsAIPeGQFIDSKK      | K | A | 95.00% | 88  |                                                    | 909.0018  | 2 | 8.1 | 730  | 746  | Yes |  |
| VLNAsAIPeGQFIDSKK      | K | A | 95.00% | 54  |                                                    | 606.3343  | 3 | 3.4 | 730  | 746  | Yes |  |
| VQLLHTQNTSLINTK        | R | K | 95.00% | 116 |                                                    | 855.4858  | 2 | 5.1 | 1719 | 1733 | Yes |  |
| VQLLHTQNTSLINTK        | R | K | 95.00% | 74  |                                                    | 570.6585  | 3 | 2.8 | 1719 | 1733 | Yes |  |
| VQLLHTQNTSLINTKK       | R | K | 95.00% | 102 |                                                    | 919.5307  | 2 | 1.9 | 1719 | 1734 | Yes |  |
| VQLLHTQNTSLINTKK       | R | K | 95.00% | 62  |                                                    | 613.3572  | 3 | 3.3 | 1719 | 1734 | Yes |  |
| VQLLHTQNTSLINTKK       | R | K | 95.00% | 34  |                                                    | 460.2692  | 4 | 1.7 | 1719 | 1734 | Yes |  |
| VRELEGEVESEQK          | R | R | 95.00% | 79  |                                                    | 766.3853  | 2 | 1.5 | 1825 | 1837 | Yes |  |
| VRELEGEVESEQK          | R | R | 95.00% | 42  |                                                    | 511.2623  | 3 | 7.0 | 1825 | 1837 | Yes |  |
| VRELEGEVESEQKR         | R | N | 95.00% | 95  |                                                    | 844.4380  | 2 | 3.9 | 1825 | 1838 | Yes |  |
| VRELEGEVESEQKR         | R | N | 95.00% | 87  |                                                    | 563.2943  | 3 | 3.4 | 1825 | 1838 | Yes |  |
| VRELEGEVESEQKR         | R | N | 95.00% | 57  |                                                    | 422.7220  | 4 | 1.9 | 1825 | 1838 | Yes |  |
| VVFQLK                 | R | A | 95.00% | 28  |                                                    | 733.4636  | 1 | 3.2 | 276  | 281  | No  |  |
| VVFQLKAER              | R | S | 95.00% | 35  |                                                    | 545.3275  | 2 | 4.7 | 276  | 284  | No  |  |
| YDKIEDMAMMTHLHEPAVLNKL | K | E | 95.00% | 39  | M10: Oxidation                                     | 695.3429  | 4 | 6.3 | 85   | 107  | Yes |  |
| YDKIEDMAMMTHLHEPAVLNKL | K | E | 95.00% | 51  | M7: Oxidation                                      | 695.3415  | 4 | 4.3 | 85   | 107  | Yes |  |
| YDKIEDMAMMTHLHEPAVLNKL | K | E | 95.00% | 44  | M7: Oxidation                                      | 932.1197  | 3 | 6.5 | 85   | 107  | Yes |  |
| YDKIEDMAMMTHLHEPAVLNKL | K | E | 95.00% | 41  | M7: Oxidation                                      | 699.3425  | 4 | 7.5 | 85   | 107  | Yes |  |
| YDKIEDMAMMTHLHEPAVLNKL | K | E | 95.00% | 38  | M7: Oxidation                                      | 703.3388  | 4 | 4.1 | 85   | 107  | Yes |  |
| YDKIEDMAMMTHLHEPAVLNKL | K | E | 95.00% | 45  | M7: Oxidation,<br>M10: Oxidation                   | 932.1219  | 3 | 8.8 | 85   | 107  | Yes |  |
| YDKIEDMAMMTHLHEPAVLNKL | K | E | 95.00% | 47  | M7: Oxidation,<br>M10: Oxidation                   | 699.3423  | 4 | 7.3 | 85   | 107  | Yes |  |
| YDKIEDMAMMTHLHEPAVLNKL | K | E | 95.00% | 44  | M7: Oxidation, M9:<br>Oxidation                    | 932.1197  | 3 | 6.5 | 85   | 107  | Yes |  |
| YDKIEDMAMMTHLHEPAVLNKL | K | E | 95.00% | 37  | M7: Oxidation, M9:<br>Oxidation                    | 699.3398  | 4 | 3.7 | 85   | 107  | Yes |  |
| YDKIEDMAMMTHLHEPAVLNKL | K | E | 95.00% | 38  | M7: Oxidation, M9:<br>Oxidation                    | 703.3388  | 4 | 4.1 | 85   | 107  | Yes |  |
| YDKIEDMAMMTHLHEPAVLNKL | K | E | 95.00% | 38  | M7: Oxidation, M9:<br>Oxidation, M10:<br>Oxidation | 703.3388  | 4 | 4.1 | 85   | 107  | Yes |  |
| YDKIEDMAMMTHLHEPAVLNKL | K | E | 95.00% | 37  | M9: Oxidation                                      | 695.3418  | 4 | 4.7 | 85   | 107  | Yes |  |
| YDKIEDMAMMTHLHEPAVLNKL | K | E | 95.00% | 44  | M9: Oxidation                                      | 932.1201  | 3 | 6.8 | 85   | 107  | Yes |  |

|    |                                                                                           |          |                                                                                                                                                |                          |   |   |        |     |                               |           |   |      |      |      |     |
|----|-------------------------------------------------------------------------------------------|----------|------------------------------------------------------------------------------------------------------------------------------------------------|--------------------------|---|---|--------|-----|-------------------------------|-----------|---|------|------|------|-----|
|    |                                                                                           |          |                                                                                                                                                | YDKIEDMAMMTHLHEPAVLNLIK  | K | E | 95.00% | 42  | M9: Oxidation                 | 699.3422  | 4 | 7.2  | 85   | 107  | Yes |
|    |                                                                                           |          |                                                                                                                                                | YDKIEDMAMMTHLHEPAVLNLIK  | K | E | 95.00% | 44  | M9: Oxidation, M10: Oxidation | 932.1201  | 3 | 6.8  | 85   | 107  | Yes |
|    |                                                                                           |          |                                                                                                                                                | YDKIEDMAMMTHLHEPAVLNLIK  | K | E | 95.00% | 54  | M9: Oxidation, M10: Oxidation | 699.3412  | 4 | 5.7  | 85   | 107  | Yes |
|    |                                                                                           |          |                                                                                                                                                | YDKIEDMAMMTHLHEPAVLNLIK  | K | E | 95.00% | 48  |                               | 691.3441  | 4 | 6.3  | 85   | 107  | Yes |
|    |                                                                                           |          |                                                                                                                                                | YETDAIQR                 | K | T | 95.00% | 34  |                               | 498.2464  | 2 | 5.1  | 1381 | 1388 | Yes |
|    |                                                                                           |          |                                                                                                                                                | YKVLNASAIPEGQFIDSK       | R | K | 95.00% | 110 |                               | 990.5358  | 2 | 9.8  | 728  | 745  | Yes |
|    |                                                                                           |          |                                                                                                                                                | YKVLNASAIPEGQFIDSK       | R | K | 95.00% | 53  |                               | 660.6901  | 3 | 5.3  | 728  | 745  | Yes |
|    |                                                                                           |          |                                                                                                                                                | YKVLNASAIPEGQFIDSKK      | R | A | 95.00% | 82  |                               | 703.3906  | 3 | 8.1  | 728  | 746  | Yes |
|    |                                                                                           |          |                                                                                                                                                | YKVLNASAIPEGQFIDSKK      | R | A | 95.00% | 28  |                               | 527.7926  | 4 | 3.7  | 728  | 746  | Yes |
| 50 | IPI00007926                                                                               | C6orf108 | C-MYC-RESPONSIVE PROTEIN RCL.                                                                                                                  | FGTVLTEHVAAAELGAR        | R | G | 95.00% | 29  |                               | 871.4609  | 2 | -5.6 | 49   | 65   | No  |
|    |                                                                                           |          |                                                                                                                                                | FGTVLTEHVAAAELGAR        | R | G | 95.00% | 61  |                               | 581.3182  | 3 | 8.8  | 49   | 65   | No  |
|    |                                                                                           |          |                                                                                                                                                | YFEADPPGQVAASPDTT        | R | - | 95.00% | 72  |                               | 931.9316  | 2 | 5.4  | 157  | 174  | No  |
| 51 | IPI00008215                                                                               | ME1      | NADP-DEPENDENT MALIC ENZYME.                                                                                                                   | DLAFTLEER                | K | Q | 95.00% | 35  |                               | 547.2827  | 2 | 4.1  | 27   | 35   | No  |
|    |                                                                                           |          |                                                                                                                                                | DMAAFNERPIIFALSNPSTK     | K | A | 95.00% | 56  | M2: Oxidation                 | 746.7180  | 3 | 6.8  | 393  | 412  | No  |
|    |                                                                                           |          |                                                                                                                                                | GHIASVLNAWPEVDIK         | R | A | 95.00% | 66  |                               | 874.9781  | 2 | 8.4  | 131  | 146  | No  |
|    |                                                                                           |          |                                                                                                                                                | GLFITIHDR                | R | G | 95.00% | 37  |                               | 536.3048  | 2 | 6.0  | 122  | 130  | No  |
|    |                                                                                           |          |                                                                                                                                                | GSEYDDFLDEFMEAVSSK       | R | Y | 95.00% | 104 | M12: Oxidation                | 1042.9440 | 2 | 7.4  | 218  | 235  | No  |
|    |                                                                                           |          |                                                                                                                                                | NFEHLNSDFDR              | K | Y | 95.00% | 35  |                               | 697.3160  | 2 | 7.6  | 61   | 71   | No  |
|    |                                                                                           |          |                                                                                                                                                | TATVYPEPQNK              | K | E | 95.00% | 50  |                               | 624.3223  | 2 | 7.6  | 526  | 536  | No  |
|    |                                                                                           |          | ISOFORM 1 OF DIABLO HOMOLOG, MITOCHONDRIAL PRECURSOR.; ISOFORM 2 OF DIABLO HOMOLOG, MITOCHONDRIAL PRECURSOR.; 19 KDA PROTEIN.; 18 KDA PROTEIN. | AESEQEAYLRD              | R | - | 95.00% | 62  |                               | 720.3254  | 2 | 9.7  | 228  | 239  | No  |
| 52 | IPI00008418; IPI00219865; IPI00789460; IPI00794003                                        | DIABLO   |                                                                                                                                                | AVYTLTSLYR               | K | Q | 95.00% | 50  |                               | 593.8289  | 2 | 2.3  | 53   | 62   | No  |
|    |                                                                                           |          |                                                                                                                                                | LAEAQIEELR               | K | Q | 95.00% | 72  |                               | 586.3259  | 2 | 9.8  | 208  | 217  | No  |
|    |                                                                                           |          |                                                                                                                                                | SEPHLSSEALMR             | K | R | 95.00% | 32  | M12: Oxidation                | 487.2368  | 3 | 6.7  | 63   | 75   | No  |
| 53 | IPI00008485                                                                               | ACO1     | IRON-RESPONSIVE ELEMENT-BINDING PROTEIN 1.                                                                                                     | ANYLASPPLVIAYAIGTIR      | R | I | 95.00% | 54  |                               | 1037.5970 | 2 | 8.0  | 548  | 567  | No  |
|    |                                                                                           |          |                                                                                                                                                | FVEFFGPGVAQLSIADR        | K | A | 95.00% | 81  |                               | 926.9877  | 2 | 4.2  | 277  | 293  | No  |
|    |                                                                                           |          |                                                                                                                                                | GPFLLGK                  | K | A | 95.00% | 39  |                               | 422.7718  | 2 | 7.2  | 786  | 793  | No  |
|    |                                                                                           |          |                                                                                                                                                | IDFEKEPLGVNAK            | R | G | 95.00% | 42  |                               | 487.2677  | 3 | 5.1  | 568  | 580  | No  |
|    |                                                                                           |          |                                                                                                                                                | IETVNESWINALTPSDK        | K | L | 95.00% | 87  |                               | 937.9639  | 2 | 3.4  | 616  | 632  | No  |
|    |                                                                                           |          |                                                                                                                                                | QAPQTIHLPSGEILDVFDAAER   | K | Y | 95.00% | 60  |                               | 803.0839  | 3 | 4.3  | 737  | 758  | No  |
|    |                                                                                           |          |                                                                                                                                                | VILQDFTGVPVVDFAAMR       | R | D | 95.00% | 87  | M18: Oxidation                | 1033.0510 | 2 | 6.9  | 83   | 101  | No  |
|    |                                                                                           |          |                                                                                                                                                | VILQDFTGVPVVDFAAMR       | R | D | 95.00% | 49  | M18: Oxidation                | 689.0339  | 3 | 3.2  | 83   | 101  | No  |
|    |                                                                                           |          |                                                                                                                                                | VLLAAAIR                 | R | N | 95.00% | 35  |                               | 442.7845  | 2 | 4.9  | 41   | 48   | No  |
|    |                                                                                           |          |                                                                                                                                                | YQQAGLPLIVLAGK           | R | E | 95.00% | 58  |                               | 735.9407  | 2 | 3.4  | 759  | 772  | No  |
|    |                                                                                           |          | 60S ACIDIC RIBOSOMAL PROTEIN P0.; RPLP0 PROTEIN.; 18 KDA PROTEIN.; 16 KDA PROTEIN.; 19 KDA PROTEIN.; 23 KDA PROTEIN.; 24 KDA PROTEIN.          | GHLENNPALEK              | R | L | 95.00% | 47  |                               | 611.3198  | 2 | 7.2  | 67   | 77   | No  |
| 54 | IPI00008530; IPI00556485; IPI00791188; IPI00792267; IPI00793002; IPI00793584; IPI00794884 | RPLP0    |                                                                                                                                                | GNVGFVFTK                | R | E | 95.00% | 40  |                               | 484.7666  | 2 | 5.0  | 84   | 92   | No  |
|    |                                                                                           |          |                                                                                                                                                | GTIEILSDVQLIK            | R | T | 95.00% | 74  |                               | 714.9258  | 2 | 8.5  | 150  | 162  | No  |
|    |                                                                                           |          |                                                                                                                                                | IIQLDDYPK                | K | C | 95.00% | 66  |                               | 609.3489  | 2 | 9.4  | 17   | 26   | No  |
|    |                                                                                           |          |                                                                                                                                                | TSFFQALGITTK             | K | I | 95.00% | 100 |                               | 657.3638  | 2 | 6.9  | 135  | 146  | No  |
|    |                                                                                           |          |                                                                                                                                                | VLALSIVETDYTFPLAEK       | R | V | 95.00% | 56  |                               | 948.5131  | 2 | 9.3  | 248  | 264  | No  |
|    |                                                                                           |          | ISOFORM 1 OF PROTEIN NDRG2.; ISOFORM 2 OF PROTEIN NDRG2.; ISOFORM 3 OF PROTEIN NDRG2.; CYTOPLASMIC PROTEIN NDR1.                               | GWMDWAAHK                | K | L | 95.00% | 31  | M3: Oxidation                 | 559.2505  | 2 | 3.7  | 177  | 185  | No  |
| 55 | IPI00008994; IPI00218108; IPI00218109; IPI00382995                                        | NDRG2    |                                                                                                                                                | ILLDQGQTHSVETPYGVSFTVY   | K | L | 95.00% | 84  |                               | 1055.2240 | 3 | 7.7  | 33   | 61   | No  |
|    |                                                                                           |          |                                                                                                                                                | GTPKPK                   | R | R | 95.00% | 48  |                               | 575.3138  | 2 | 3.4  | 278  | 287  | No  |
|    |                                                                                           |          |                                                                                                                                                | LDPTQTSFLK               | K | M | 95.00% | 49  |                               |           |   |      |      |      |     |
|    |                                                                                           |          |                                                                                                                                                | LTGLTSSIPEMILGHLFSQEELSG | K | Y | 95.00% | 49  | M11: Oxidation                | 1129.9280 | 3 | 9.9  | 186  | 216  | No  |
|    |                                                                                           |          |                                                                                                                                                | NSELIQK                  | K | L | 95.00% | 102 | M1: Oxidation                 | 765.8677  | 2 | 3.3  | 288  | 302  | No  |
|    |                                                                                           |          |                                                                                                                                                | MADSGGQPQLTQPGK          | K | L | 95.00% | 39  | M1: Oxidation                 | 510.9159  | 3 | 6.2  | 288  | 302  | No  |
|    |                                                                                           |          |                                                                                                                                                | MADSGGQPQLTQPGK          | K | L | 95.00% | 60  |                               | 757.8745  | 2 | 8.9  | 288  | 302  | No  |
|    |                                                                                           |          |                                                                                                                                                | NIITHAPNLDNIELYWNSYNNR   | R | R | 95.00% | 60  |                               | 892.1123  | 3 | 7.4  | 219  | 240  | No  |
|    |                                                                                           |          |                                                                                                                                                | RPAILTYHDVGLNYK          | K | S | 95.00% | 84  |                               | 880.4828  | 2 | 4.7  | 62   | 76   | No  |
|    |                                                                                           |          |                                                                                                                                                | RPAILTYHDVGLNYK          | K | S | 95.00% | 65  |                               | 587.3244  | 3 | 4.6  | 62   | 76   | No  |
|    |                                                                                           |          |                                                                                                                                                | RPAILTYHDVGLNYK          | K | S | 95.00% | 38  |                               | 440.7449  | 4 | 3.7  | 62   | 76   | No  |
|    |                                                                                           |          |                                                                                                                                                | TASLTSAAASVDGNR          | R | S | 95.00% | 54  |                               | 675.3409  | 2 | 5.9  | 330  | 343  | No  |
|    |                                                                                           |          |                                                                                                                                                | YALNHPDIVEGLVINIDPNAK    | R | G | 95.00% | 64  |                               | 802.7676  | 3 | 8.3  | 155  | 176  | No  |
| 56 | IPI00009236                                                                               | CAV1     | ISOFORM ALPHA OF CAVEOLIN-1.                                                                                                                   | ASFTTFTVTK               | K | Y | 95.00% | 27  |                               | 551.7985  | 2 | 9.6  | 87   | 96   | No  |
|    |                                                                                           |          |                                                                                                                                                | YVDSEGHLYTVPIR           | K | E | 95.00% | 42  |                               | 550.2881  | 3 | 9.3  | 6    | 19   | No  |



|                         |                                       |        |                                                                                                      |                          |             |      |                                                           |            |          |    |        |      |           |    |     |     |     |    |
|-------------------------|---------------------------------------|--------|------------------------------------------------------------------------------------------------------|--------------------------|-------------|------|-----------------------------------------------------------|------------|----------|----|--------|------|-----------|----|-----|-----|-----|----|
| 65                      | IPI00010331; IPI00016807              | SIRT5  | ISOFORM 2 OF NAD-DEPENDENT DEACETYLASE SIRTUIN-5.; ISOFORM 1 OF NAD-DEPENDENT DEACETYLASE SIRTUIN-5. | GAPEPGTQDASIPVEK         | K           | L    | 95.00%                                                    | 88         | 798.4052 | 2  | 6.7    | 188  | 203       | No |     |     |     |    |
|                         |                                       |        |                                                                                                      | NLLEIHGSLFK              | K           | T    | 95.00%                                                    | 33         | 635.8678 | 2  | 9.2    | 153  | 163       | No |     |     |     |    |
|                         |                                       |        |                                                                                                      | RVVVITQNLDELHR           | R           | K    | 95.00%                                                    | 60         | 564.6617 | 3  | 8.0    | 134  | 147       | No |     |     |     |    |
| 66                      | IPI00010414; IPI00798196              | PDLIM1 | PDZ AND LIM DOMAIN PROTEIN 1.; 29 KDA PROTEIN.                                                       | DFEQPLAIRS               | K           | V    | 95.00%                                                    | 41         | 588.3087 | 2  | 2.9    | 23   | 32        | No |     |     |     |    |
|                         |                                       |        |                                                                                                      | MNLASEPQEVHLHIGSAHNR     | K           | S    | 95.00%                                                    | 48         | 530.5186 | 4  | 7.3    | 104  | 122       | No |     |     |     |    |
|                         |                                       |        |                                                                                                      | SAMPFTASPASSTTAR         | R           | V    | 95.00%                                                    | 81         | 799.8859 | 2  | 9.7    | 123  | 138       | No |     |     |     |    |
|                         |                                       |        |                                                                                                      | VTPPEGYEVTVFPK           | R           | -    | 95.00%                                                    | 42         | 831.4498 | 2  | 7.6    | 315  | 329       | No |     |     |     |    |
|                         |                                       |        |                                                                                                      | M1: Oxidation            |             |      |                                                           |            |          |    |        |      |           |    |     |     |     |    |
| 67                      | IPI00010418; IPI00743335; IPI00829992 | MYO1C  | MYOSIN-IC.; MYOSIN IC ISOFORM A.; MYOSIN IC ISOFORM B.                                               | DGTIDFTPGSELLITK         | R           | A    | 95.00%                                                    | 68         | 853.9514 | 2  | 5.5    | 1032 | 1047      | No |     |     |     |    |
|                         |                                       |        |                                                                                                      | GEELLSPLNLEQAAYAR        | K           | D    | 95.00%                                                    | 92         | 937.4922 | 2  | 5.6    | 362  | 378       | No |     |     |     |    |
|                         |                                       |        |                                                                                                      | LLQSNPVEAFGNAK           | R           | T    | 95.00%                                                    | 50         | 800.9434 | 2  | 5.6    | 139  | 153       | No |     |     |     |    |
|                         |                                       |        |                                                                                                      | MSLLQLVEILQSK            | K           | E    | 95.00%                                                    | 84         | 759.4399 | 2  | 6.9    | 606  | 618       | No |     |     |     |    |
|                         |                                       |        |                                                                                                      | M1: Oxidation            |             |      |                                                           |            |          |    |        |      |           |    |     |     |     |    |
|                         |                                       |        |                                                                                                      | NPQSYLYLVK               | R           | G    | 95.00%                                                    | 45         | 612.8398 | 2  | 7.3    | 225  | 234       | No |     |     |     |    |
|                         |                                       |        |                                                                                                      | TLFATEDALEVR             | K           | R    | 95.00%                                                    | 52         | 682.8636 | 2  | 9.6    | 687  | 698       | No |     |     |     |    |
|                         |                                       |        |                                                                                                      | TSFLLNLR                 | R           | R    | 95.00%                                                    | 59         | 482.2880 | 2  | 5.6    | 814  | 821       | No |     |     |     |    |
|                         |                                       |        |                                                                                                      | VLQALGSEPIQYAVPVVK       | R           | Y    | 95.00%                                                    | 95         | 956.0569 | 2  | 5.5    | 910  | 927       | No |     |     |     |    |
|                         |                                       |        |                                                                                                      | YLGLEENLR                | K           | V    | 95.00%                                                    | 43         | 545.8204 | 2  | 6.2    | 613  | 621       | No |     |     |     |    |
|                         |                                       |        |                                                                                                      | 68                       | IPI00010796 | P4HB | PROTEIN DISULFIDE-ISOMERASE PRECURSOR.                    | EADDIVNWLK | R        | K  | 95.00% | 51   | 601.8101  | 2  | 5.3 | 121 | 130 | No |
| ENLLDFIK                | K                                     | H      | 95.00%                                                                                               |                          |             |      |                                                           | 49         | 496.2789 | 2  | 3.4    | 223  | 230       | No |     |     |     |    |
| HNQLPLVIEFTEQTAPK       | K                                     | I      | 95.00%                                                                                               |                          |             |      |                                                           | 108        | 983.0319 | 2  | 5.6    | 231  | 247       | No |     |     |     |    |
| HNQLPLVIEFTEQTAPK       | K                                     | I      | 95.00%                                                                                               |                          |             |      |                                                           | 74         | 655.6915 | 3  | 7.0    | 231  | 247       | No |     |     |     |    |
| IKPHLMSQELPEDWDKQPVK    | K                                     | V      | 95.00%                                                                                               |                          |             |      |                                                           | 41         | 812.0906 | 3  | 4.9    | 351  | 370       | No |     |     |     |    |
| M6: Oxidation           |                                       |        |                                                                                                      |                          |             |      |                                                           |            |          |    |        |      |           |    |     |     |     |    |
| IKPHLMSQELPEDWDKQPVK    | K                                     | V      | 95.00%                                                                                               |                          |             |      |                                                           | 47         | 609.3206 | 4  | 5.9    | 351  | 370       | No |     |     |     |    |
| ILEFFGLK                | R                                     | K      | 95.00%                                                                                               |                          |             |      |                                                           | 27         | 966.5754 | 1  | 9.1    | 301  | 308       | No |     |     |     |    |
| ILEFFGLK                | R                                     | K      | 95.00%                                                                                               |                          |             |      |                                                           | 57         | 483.7891 | 2  | 4.0    | 301  | 308       | No |     |     |     |    |
| ILFIFIDSHTDNQR          | K                                     | I      | 95.00%                                                                                               |                          |             |      |                                                           | 95         | 917.4669 | 2  | 6.7    | 286  | 300       | No |     |     |     |    |
| KSNFAEALAAHK            | R                                     | Y      | 95.00%                                                                                               |                          |             |      |                                                           | 38         | 429.5694 | 3  | 5.3    | 31   | 42        | No |     |     |     |    |
| LGETYKDHENIVIAK         | K                                     | M      | 95.00%                                                                                               |                          |             |      |                                                           | 70         | 865.4641 | 2  | 4.5    | 410  | 424       | No |     |     |     |    |
| LGETYKDHENIVIAK         | K                                     | M      | 95.00%                                                                                               |                          |             |      |                                                           | 47         | 577.3116 | 3  | 3.8    | 410  | 424       | No |     |     |     |    |
| LITLEEEMTK              | R                                     | Y      | 95.00%                                                                                               |                          |             |      |                                                           | 58         | 611.8201 | 2  | 6.7    | 317  | 326       | No |     |     |     |    |
| M8: Oxidation           |                                       |        |                                                                                                      |                          |             |      |                                                           |            |          |    |        |      |           |    |     |     |     |    |
| MDSTANEVEAVK            | K                                     | V      | 95.00%                                                                                               |                          |             |      |                                                           | 75         | 655.3034 | 2  | 3.4    | 425  | 436       | No |     |     |     |    |
| NFEDVAFDEKK             | K                                     | N      | 95.00%                                                                                               |                          |             |      |                                                           | 44         | 671.3231 | 2  | 4.1    | 376  | 386       | No |     |     |     |    |
| M1: Oxidation           |                                       |        |                                                                                                      |                          |             |      |                                                           |            |          |    |        |      |           |    |     |     |     |    |
| NNFEVETKENLLDFIK        | R                                     | H      | 95.00%                                                                                               |                          |             |      |                                                           | 35         | 670.6835 | 3  | 8.2    | 214  | 230       | No |     |     |     |    |
| SNFAEALAAHK             | K                                     | Y      | 95.00%                                                                                               |                          |             |      |                                                           | 70         | 579.8012 | 2  | 3.3    | 32   | 42        | No |     |     |     |    |
| TGPAATTLPDGAAAESLVESSEV |                                       |        |                                                                                                      |                          |             |      |                                                           |            |          |    |        |      |           |    |     |     |     |    |
| AVIGFFK                 | R                                     | D      | 95.00%                                                                                               |                          |             |      |                                                           | 89         | 979.1789 | 3  | 9.3    | 133  | 162       | No |     |     |     |    |
| THILLFLPK               | K                                     | S      | 95.00%                                                                                               |                          |             |      |                                                           | 58         | 541.3455 | 2  | 5.1    | 255  | 263       | No |     |     |     |    |
| VDATEESDLAQYQYVGR       | K                                     | G      | 95.00%                                                                                               |                          |             |      |                                                           | 102        | 890.9261 | 2  | 5.1    | 82   | 97        | No |     |     |     |    |
| YKPESEELTAER            | K                                     | I      | 95.00%                                                                                               |                          |             |      |                                                           | 56         | 726.3579 | 2  | 4.2    | 327  | 338       | No |     |     |     |    |
| YKPESEELTAER            | K                                     | I      | 95.00%                                                                                               |                          |             |      |                                                           | 34         | 484.5733 | 3  | 1.7    | 327  | 338       | No |     |     |     |    |
| YQLDKDGVVLFK            | K                                     | K      | 95.00%                                                                                               |                          |             |      |                                                           | 72         | 712.8961 | 2  | 3.6    | 196  | 207       | No |     |     |     |    |
| YQLDKDGVVLFK            | K                                     | K      | 95.00%                                                                                               | 60                       | 475.6001    | 3    | 3.8                                                       | 196        | 207      | No |        |      |           |    |     |     |     |    |
| 69                      | IPI00010810                           | ETFA   | ELECTRON TRANSFER FLAVOPROTEIN SUBUNIT ALPHA, MITOCHONDRIAL PRECURSOR.                               | AAVDAGFVPNDMQVGQTGK      | R           | I    | 95.00%                                                    | 69         | 952.9708 | 2  | 8.3    | 250  | 268       | No |     |     |     |    |
|                         |                                       |        |                                                                                                      | ASSTSPVEISEWLDQK         | K           | L    | 95.00%                                                    | 93         | 888.9456 | 2  | 9.9    | 188  | 203       | No |     |     |     |    |
|                         |                                       |        |                                                                                                      | GLLPEELTPLILATQK         | K           | Q    | 95.00%                                                    | 65         | 868.5226 | 2  | 9.2    | 86   | 101       | No |     |     |     |    |
|                         |                                       |        |                                                                                                      | GLLPEELTPLILATQK         | K           | Q    | 95.00%                                                    | 55         | 579.3498 | 3  | 7.2    | 86   | 101       | No |     |     |     |    |
|                         |                                       |        |                                                                                                      | GTSFDAAATSGGSASSEK       | R           | A    | 95.00%                                                    | 121        | 815.8692 | 2  | 6.7    | 170  | 187       | No |     |     |     |    |
|                         |                                       |        |                                                                                                      | LEVAPISDIIAIK            | K           | S    | 95.00%                                                    | 69         | 691.4261 | 2  | 9.8    | 127  | 139       | No |     |     |     |    |
|                         |                                       |        |                                                                                                      | LLYDLADQLHAAVGASR        | K           | A    | 95.00%                                                    | 119        | 906.9928 | 2  | 9.4    | 233  | 249       | No |     |     |     |    |
|                         |                                       |        |                                                                                                      | LLYDLADQLHAAVGASR        | K           | A    | 95.00%                                                    | 69         | 604.9961 | 3  | 6.5    | 233  | 249       | No |     |     |     |    |
|                         |                                       |        |                                                                                                      | SPDTFVR                  | K           | T    | 95.00%                                                    | 45         | 411.2148 | 2  | 7.3    | 140  | 146       | No |     |     |     |    |
|                         |                                       |        |                                                                                                      | TIVAINKDPEAPIFQVADYGIVAD |             |      |                                                           |            |          |    |        |      |           |    |     |     |     |    |
|                         |                                       |        |                                                                                                      | LFK                      | K           | V    | 95.00%                                                    | 66         | 983.2071 | 3  | 8.0    | 295  | 321       | No |     |     |     |    |
|                         |                                       |        |                                                                                                      | VLVAQHVVYK               | K           | G    | 95.00%                                                    | 62         | 586.3311 | 2  | 5.7    | 76   | 85        | No |     |     |     |    |
|                         |                                       |        |                                                                                                      | 70                       | IPI00011107 | IDH2 | ISOCITRATE DEHYDROGENASE [NADP], MITOCHONDRIAL PRECURSOR. | ATDFVADR   | K        | A  | 95.00% | 41   | 447.7214  | 2  | 3.1 | 181 | 188 | No |
|                         |                                       |        |                                                                                                      |                          |             |      |                                                           | DIFQEIFDK  | K        | H  | 95.00% | 41   | 1154.5800 | 1  | 5.8 | 264 | 272 | No |
|                         |                                       |        |                                                                                                      |                          |             |      |                                                           | DIFQEIFDK  | K        | H  | 95.00% | 55   | 577.7952  | 2  | 7.8 | 264 | 272 | No |
| DQTDQVTVTIDSLATQK       | R                                     | Y      | 95.00%                                                                                               |                          |             |      |                                                           | 159        | 924.9539 | 2  | 9.1    | 90   | 106       | No |     |     |     |    |
| DQTDQVTVTIDSLATQK       | R                                     | Y      | 95.00%                                                                                               |                          |             |      |                                                           | 60         | 616.9709 | 3  | 7.5    | 90   | 106       | No |     |     |     |    |
| EKLILPHVDIQLK           | K                                     | Y      | 95.00%                                                                                               |                          |             |      |                                                           | 67         | 773.4772 | 2  | 6.1    | 68   | 80        | No |     |     |     |    |
| EKLILPHVDIQLK           | K                                     | Y      | 95.00%                                                                                               |                          |             |      |                                                           | 30         | 515.9878 | 3  | 6.8    | 68   | 80        | No |     |     |     |    |
| FAQMLEK                 | R                                     | V      | 95.00%                                                                                               |                          |             |      |                                                           | 42         | 441.7250 | 2  | 2.9    | 394  | 400       | No |     |     |     |    |
| M4: Oxidation           |                                       |        |                                                                                                      |                          |             |      |                                                           |            |          |    |        |      |           |    |     |     |     |    |
| FAQMLEK                 | R                                     | V      | 95.00%                                                                                               |                          |             |      |                                                           | 43         | 433.7271 | 2  | 2.1    | 394  | 400       | No |     |     |     |    |

|    |             |       |                                    |  |  |                                                                       |   |   |        |     |                                                    |           |   |     |     |     |     |
|----|-------------|-------|------------------------------------|--|--|-----------------------------------------------------------------------|---|---|--------|-----|----------------------------------------------------|-----------|---|-----|-----|-----|-----|
|    |             |       |                                    |  |  | FKDIFQEIFDK                                                           | R | H | 95.00% | 78  |                                                    | 715.3778  | 2 | 7.6 | 262 | 272 | No  |
|    |             |       |                                    |  |  | FKDIFQEIFDK                                                           | R | H | 95.00% | 54  |                                                    | 477.2538  | 3 | 6.1 | 262 | 272 | No  |
|    |             |       |                                    |  |  | FKDIFQEIFDKHYK                                                        | R | T | 95.00% | 43  |                                                    | 929.4889  | 2 | 8.7 | 262 | 275 | No  |
|    |             |       |                                    |  |  | FKDIFQEIFDKHYK                                                        | R | T | 95.00% | 46  |                                                    | 619.9929  | 3 | 4.9 | 262 | 275 | No  |
|    |             |       |                                    |  |  | FKDIFQEIFDKHYK                                                        | R | T | 95.00% | 37  |                                                    | 465.2470  | 4 | 5.7 | 262 | 275 | No  |
|    |             |       |                                    |  |  | GKLDGNQDLIR                                                           | R | F | 95.00% | 77  |                                                    | 614.8373  | 2 | 1.3 | 383 | 393 | No  |
|    |             |       |                                    |  |  | GKLDGNQDLIR                                                           | R | F | 95.00% | 42  |                                                    | 410.2280  | 3 | 2.5 | 383 | 393 | No  |
|    |             |       |                                    |  |  | GRPTSTNPIASIFAWTR                                                     | K | G | 95.00% | 80  |                                                    | 938.0064  | 2 | 9.1 | 361 | 377 | No  |
|    |             |       |                                    |  |  | GRPTSTNPIASIFAWTR                                                     | K | G | 95.00% | 75  |                                                    | 625.6714  | 3 | 5.7 | 361 | 377 | No  |
|    |             |       |                                    |  |  | IIWQFIK                                                               | R | E | 95.00% | 46  |                                                    | 474.2942  | 2 | 9.1 | 61  | 67  | No  |
|    |             |       |                                    |  |  | LDGNQDLIR                                                             | K | F | 95.00% | 64  |                                                    | 522.2833  | 2 | 9.6 | 385 | 393 | No  |
|    |             |       |                                    |  |  | LIDDMVAQVLK                                                           | R | S | 95.00% | 37  |                                                    | 1260.6980 | 1 | 8.1 | 289 | 299 | No  |
|    |             |       |                                    |  |  | LIDDMVAQVLK                                                           | R | S | 95.00% | 99  | M5: Oxidation                                      | 630.8519  | 2 | 6.7 | 289 | 299 | No  |
|    |             |       |                                    |  |  | LIDDMVAQVLK                                                           | R | S | 95.00% | 92  | M5: Oxidation                                      | 622.8544  | 2 | 6.7 | 289 | 299 | No  |
|    |             |       |                                    |  |  | LILPHVDIQLK                                                           | K | Y | 95.00% | 68  |                                                    | 644.9088  | 2 | 8.0 | 70  | 80  | No  |
|    |             |       |                                    |  |  | LILPHVDIQLK                                                           | K | Y | 95.00% | 44  |                                                    | 430.2731  | 3 | 3.2 | 70  | 80  | No  |
|    |             |       |                                    |  |  | LNEHFLNTTDFLDTIK                                                      | K | S | 95.00% | 94  |                                                    | 960.9984  | 2 | 9.3 | 427 | 442 | No  |
|    |             |       |                                    |  |  | LNEHFLNTTDFLDTIK                                                      | K | S | 95.00% | 69  |                                                    | 640.9986  | 3 | 4.8 | 427 | 442 | No  |
|    |             |       |                                    |  |  | LVPGWTKPITIGR                                                         | R | H | 95.00% | 60  |                                                    | 719.4380  | 2 | 6.8 | 160 | 172 | No  |
|    |             |       |                                    |  |  | LVPGWTKPITIGR                                                         | R | H | 95.00% | 46  |                                                    | 479.9597  | 3 | 3.6 | 160 | 172 | No  |
|    |             |       |                                    |  |  | MVFTPK                                                                | K | D | 95.00% | 27  |                                                    | 722.3978  | 1 | 9.1 | 194 | 199 | No  |
|    |             |       |                                    |  |  | NILGGTVFR                                                             | R | E | 95.00% | 57  |                                                    | 488.7877  | 2 | 9.7 | 141 | 149 | Yes |
|    |             |       |                                    |  |  | PTSTNPIASIFAWTR                                                       | R | G | 95.00% | 108 |                                                    | 831.4431  | 2 | 7.9 | 363 | 377 | No  |
|    |             |       |                                    |  |  | PVEMDGEDMTR                                                           | K | I | 95.00% | 66  | M10: Oxidation                                     | 697.8043  | 2 | 5.3 | 49  | 60  | No  |
|    |             |       |                                    |  |  | PVEMDGEDMTR                                                           | K | I | 95.00% | 55  | M5: Oxidation                                      | 697.8019  | 2 | 1.8 | 49  | 60  | No  |
|    |             |       |                                    |  |  | PVEMDGEDMTR                                                           | K | I | 95.00% | 67  | M5: Oxidation,<br>M5: Oxidation,<br>M10: Oxidation | 705.8010  | 2 | 4.2 | 49  | 60  | No  |
|    |             |       |                                    |  |  | PVEMDGEDMTR                                                           | K | I | 95.00% | 67  | M10: Oxidation                                     | 705.8010  | 2 | 4.2 | 49  | 60  | No  |
|    |             |       |                                    |  |  | TIEEAAHGTVTR                                                          | K | H | 95.00% | 107 |                                                    | 678.3520  | 2 | 3.2 | 341 | 353 | No  |
|    |             |       |                                    |  |  | TIEEAAHGTVTR                                                          | K | H | 95.00% | 58  |                                                    | 452.5698  | 3 | 1.3 | 341 | 353 | No  |
|    |             |       |                                    |  |  | VAKPVEMDGEDMTR                                                        | K | I | 95.00% | 77  | M8: Oxidation                                      | 846.9026  | 2 | 2.1 | 46  | 60  | No  |
|    |             |       |                                    |  |  | VAKPVEMDGEDMTR                                                        | K | I | 95.00% | 65  | M8: Oxidation                                      | 564.9377  | 3 | 2.2 | 46  | 60  | No  |
|    |             |       |                                    |  |  | VAKPVEMDGEDMTR                                                        | K | I | 95.00% | 77  | M8: Oxidation                                      | 854.9019  | 2 | 4.2 | 46  | 60  | No  |
|    |             |       |                                    |  |  | VAKPVEMDGEDMTR                                                        | K | I | 95.00% | 86  | M8: Oxidation,<br>M8: Oxidation,                   | 570.2722  | 3 | 7.1 | 46  | 60  | No  |
|    |             |       |                                    |  |  | VAKPVEMDGEDMTR                                                        | K | I | 95.00% | 77  | M13: Oxidation<br>M8: Oxidation,<br>M13: Oxidation | 854.9019  | 2 | 4.2 | 46  | 60  | No  |
|    |             |       |                                    |  |  | VAKPVEMDGEDMTR                                                        | K | I | 95.00% | 86  |                                                    | 570.2722  | 3 | 7.1 | 46  | 60  | No  |
|    |             |       |                                    |  |  | VAKPVEMDGEDMTR                                                        | K | I | 95.00% | 81  |                                                    | 838.9076  | 2 | 5.1 | 46  | 60  | No  |
|    |             |       |                                    |  |  | VAKPVEMDGEDMTR                                                        | K | I | 95.00% | 52  |                                                    | 559.6060  | 3 | 2.1 | 46  | 60  | No  |
|    |             |       |                                    |  |  | YFDLGLPNR                                                             | K | D | 95.00% | 51  |                                                    | 1094.5700 | 1 | 5.6 | 81  | 89  | No  |
|    |             |       |                                    |  |  | YFDLGLPNR                                                             | K | D | 95.00% | 58  |                                                    | 547.7892  | 2 | 6.4 | 81  | 89  | No  |
|    |             |       |                                    |  |  | YFDLGLPNRDQDDQVTTIDSALA                                               |   |   |        |     |                                                    |           |   |     |     |     |     |
|    |             |       |                                    |  |  | TOK                                                                   | K | Y | 95.00% | 90  |                                                    | 975.4889  | 3 | 7.9 | 81  | 106 | No  |
| 71 | IPI00011126 | PSMC1 | 26S PROTEASE REGULATORY SUBUNIT 4. |  |  | APQETYADIGLDNQIQEIK                                                   | K | E | 95.00% | 70  |                                                    | 1102.0590 | 2 | 9.6 | 179 | 198 | No  |
|    |             |       |                                    |  |  | GVIYGGPPGTGK                                                          | K | T | 95.00% | 39  |                                                    | 579.8320  | 2 | 3.1 | 221 | 232 | No  |
|    |             |       |                                    |  |  | IKDYLLMEEEFIR                                                         | R | N | 95.00% | 60  | M7: Oxidation                                      | 572.3011  | 3 | 8.8 | 68  | 80  | No  |
|    |             |       |                                    |  |  | MTLADDVTLDDLIMAK                                                      | R | D | 95.00% | 96  | M1: Oxidation,                                     | 898.9439  | 2 | 7.5 | 372 | 387 | No  |
|    |             |       |                                    |  |  | TMLELLNQLDGFDSR                                                       | R | G | 95.00% | 109 | M2: Oxidation                                      | 884.4419  | 2 | 9.7 | 308 | 322 | No  |
|    |             |       |                                    |  |  | VAEEHAPSIVFIDEIDAIGTK                                                 | R | R | 95.00% | 49  |                                                    | 752.0656  | 3 | 9.0 | 273 | 293 | No  |
|    |             |       |                                    |  |  | VVGSELIQK                                                             | R | Y | 95.00% | 30  |                                                    | 486.7931  | 2 | 5.6 | 250 | 258 | No  |
|    |             |       |                                    |  |  | NAD-DEPENDENT MALIC ENZYME,<br>MITOCHONDRIAL PRECURSOR.               |   |   |        |     |                                                    |           |   |     |     |     |     |
|    |             |       |                                    |  |  | HISDSVFLEAAK                                                          | R | A | 95.00% | 39  |                                                    | 658.8495  | 2 | 4.5 | 485 | 496 | No  |
|    |             |       |                                    |  |  | IETQDIQALR                                                            | K | F | 95.00% | 47  |                                                    | 593.8313  | 2 | 9.6 | 58  | 67  | No  |
|    |             |       |                                    |  |  | LFTPDVIR                                                              | R | A | 95.00% | 30  |                                                    | 480.7834  | 2 | 7.3 | 398 | 405 | No  |
|    |             |       |                                    |  |  | DPDAQPGGELMLGGTDSK                                                    | R | Y | 95.00% | 107 | M11: Oxidation                                     | 902.4130  | 2 | 5.9 | 236 | 253 | No  |
|    |             |       |                                    |  |  | FDGILGMAYPR                                                           | K | I | 95.00% | 28  | M7: Oxidation                                      | 628.3166  | 2 | 8.7 | 195 | 205 | No  |
|    |             |       |                                    |  |  | VSTLPAITLK                                                            | K | L | 95.00% | 37  |                                                    | 521.8336  | 2 | 7.6 | 332 | 341 | No  |
|    |             |       |                                    |  |  | UBIQUITIN CARBOXYL-TERMINAL HYDROLASE<br>ISOZYME L3.; 17 KDA PROTEIN. |   |   |        |     |                                                    |           |   |     |     |     |     |
|    |             |       |                                    |  |  | FLEESVSMSPEER                                                         | K | A | 95.00% | 51  | M8: Oxidation                                      | 778.3583  | 2 | 8.9 | 122 | 134 | No  |
|    |             |       |                                    |  |  | SQGQDVTSSVYFMK                                                        | K | Q | 95.00% | 76  | M13: Oxidation                                     | 796.8687  | 2 | 1.8 | 75  | 88  | No  |
|    |             |       |                                    |  |  | VTHETSAHEGQTEAPSIDEK                                                  | R | V | 95.00% | 55  |                                                    | 722.6761  | 3 | 8.0 | 146 | 165 | No  |
|    |             |       |                                    |  |  | YLENYDAIR                                                             | R | V | 95.00% | 43  |                                                    | 578.7897  | 2 | 6.5 | 137 | 145 | No  |
|    |             |       |                                    |  |  | APSDLYQIILK                                                           | K | A | 95.00% | 77  |                                                    | 630.8695  | 2 | 8.4 | 230 | 240 | No  |
|    |             |       |                                    |  |  | DFFLANASR                                                             | R | A | 95.00% | 34  |                                                    | 520.7643  | 2 | 4.1 | 463 | 471 | No  |
|    |             |       |                                    |  |  | DMETIGFAVYEVPPPELVGQPAV                                               |   |   |        |     |                                                    |           |   |     |     |     |     |
|    |             |       |                                    |  |  | HLK                                                                   | R | R | 95.00% | 80  | M2: Oxidation                                      | 919.1470  | 3 | 8.6 | 437 | 461 | No  |
|    |             |       |                                    |  |  | KAPSDLYQIILK                                                          | R | A | 95.00% | 66  |                                                    | 694.9148  | 2 | 4.5 | 229 | 240 | No  |
|    |             |       |                                    |  |  | KLYELIITR                                                             | K | Y | 95.00% | 32  |                                                    | 574.8592  | 2 | 5.3 | 654 | 662 | No  |

|    |             |         |                                                                       |                          |   |   |        |     |                                              |           |   |     |     |     |    |
|----|-------------|---------|-----------------------------------------------------------------------|--------------------------|---|---|--------|-----|----------------------------------------------|-----------|---|-----|-----|-----|----|
|    |             |         |                                                                       | LDETDPPDDYGDR            | R | E | 95.00% | 70  |                                              | 763.3061  | 2 | 7.3 | 401 | 413 | No |
|    |             |         |                                                                       | LPPGEYVVVSTFEPNKEGDFV    |   |   |        |     |                                              |           |   |     |     |     |    |
|    |             |         |                                                                       | LR                       | R | F | 95.00% | 31  |                                              | 897.1423  | 3 | 8.7 | 489 | 512 | No |
|    |             |         |                                                                       | LVFVHSAEGNEFWALLEK       | K | A | 95.00% | 33  |                                              | 726.0479  | 3 | 9.4 | 175 | 193 | No |
|    |             |         |                                                                       | LYELIITR                 | K | Y | 95.00% | 49  |                                              | 510.8105  | 2 | 3.7 | 655 | 662 | No |
|    |             |         |                                                                       | NYLSIFR                  | R | K | 95.00% | 44  |                                              | 456.7530  | 2 | 4.2 | 619 | 625 | No |
|    |             |         |                                                                       | QLAGEDMEISVK             | R | E | 95.00% | 40  | M7: Oxidation                                | 668.3284  | 2 | 1.6 | 553 | 564 | No |
|    |             |         |                                                                       | RPTSELLSNPQFIVDGATR      | K | T | 95.00% | 74  |                                              | 672.0342  | 3 | 7.4 | 87  | 104 | No |
|    |             |         |                                                                       | SEQFINLR                 | R | E | 95.00% | 43  |                                              | 503.7735  | 2 | 7.0 | 474 | 481 | No |
|    |             |         |                                                                       | TLDTDLGVTFDLFK           | K | W | 95.00% | 132 |                                              | 899.9680  | 2 | 9.0 | 691 | 706 | No |
|    |             |         |                                                                       | WNNTLYEGTWR              | K | R | 95.00% | 42  |                                              | 713.8479  | 2 | 8.6 | 366 | 376 | No |
|    |             |         |                                                                       | YLGQDYEQLR               | K | V | 95.00% | 63  |                                              | 642.8206  | 2 | 8.5 | 37  | 46  | No |
| 76 | IPI00011416 | ECH1    | DELTA(3,5)-DELTA(2,4)-DIENOYL-COA ISOMERASE, MITOCHONDRIAL PRECURSOR. | EVDVGLAADVGTLQR          | K | L | 95.00% | 34  |                                              | 771.9180  | 2 | 9.7 | 197 | 211 | No |
|    |             |         |                                                                       | EVDVGLAADVGTLQR          | K | L | 95.00% | 51  |                                              | 514.9453  | 3 | 4.7 | 197 | 211 | No |
|    |             |         |                                                                       | HVLHVQLNRPNK             | K | R | 95.00% | 45  |                                              | 727.9257  | 2 | 6.3 | 66  | 77  | No |
|    |             |         |                                                                       | HVLHVQLNRPNK             | K | R | 95.00% | 26  |                                              | 485.6189  | 3 | 4.6 | 66  | 77  | No |
|    |             |         |                                                                       | HVLHVQLNRPNKR            | K | N | 95.00% | 28  |                                              | 805.9782  | 2 | 8.1 | 66  | 78  | No |
|    |             |         |                                                                       | ISWYLR                   | R | D | 95.00% | 42  |                                              | 419.2372  | 2 | 5.2 | 138 | 143 | No |
|    |             |         |                                                                       | KMMADEALGSGLVSR          | R | V | 95.00% | 101 | M2: Oxidation, M3: Oxidation                 | 798.8948  | 2 | 5.7 | 231 | 245 | No |
|    |             |         |                                                                       | LTGSSAQEEAAGVGEAPDHS     |   |   |        |     |                                              |           |   |     |     |     |    |
|    |             |         |                                                                       | YESLR                    | R | V | 95.00% | 34  |                                              | 921.1038  | 3 | 1.6 | 33  | 59  | No |
|    |             |         |                                                                       | MFTAGIDLMDMASDILQPK      | K | G | 95.00% | 60  | M1: Oxidation, M9: Oxidation, M11: Oxidation | 715.6747  | 3 | 7.6 | 113 | 131 | No |
|    |             |         |                                                                       | MMADEALGSGLVSR           | K | V | 95.00% | 87  | M1: Oxidation, M2: Oxidation                 | 734.8492  | 2 | 8.8 | 232 | 245 | No |
|    |             |         |                                                                       | MMADEALGSGLVSR           | K | V | 95.00% | 112 |                                              | 718.8513  | 2 | 4.8 | 232 | 245 | No |
|    |             |         |                                                                       | VFPDKEVMLDAALAAEISSK     | R | S | 95.00% | 40  |                                              | 773.4227  | 3 | 8.8 | 246 | 267 | No |
|    |             |         |                                                                       | VIGNQSLVNELAFTAR         | K | K | 95.00% | 111 |                                              | 866.4772  | 2 | 4.1 | 215 | 230 | No |
|    |             |         |                                                                       | VIGNQSLVNELAFTAR         | K | K | 95.00% | 65  |                                              | 577.9905  | 3 | 9.6 | 215 | 230 | No |
|    |             |         |                                                                       | VNLLYSR                  | K | D | 95.00% | 38  |                                              | 432.7525  | 2 | 3.4 | 277 | 283 | No |
|    |             |         |                                                                       | YQETFNVIER               | R | C | 95.00% | 58  |                                              | 649.8269  | 2 | 6.1 | 149 | 158 | No |
| 77 | IPI00011525 | CASQ1   | CALSEQUESTRIN 1.                                                      | AFEDAAEEFHPYIPFFATFDSK   | K | V | 95.00% | 91  |                                              | 1290.1020 | 2 | 7.7 | 196 | 217 | No |
|    |             |         |                                                                       | AFEDAAEEFHPYIPFFATFDSK   | K | V | 95.00% | 74  |                                              | 860.4022  | 3 | 5.3 | 196 | 217 | No |
|    |             |         |                                                                       | ELQAFENIEDEIK            | R | L | 95.00% | 100 |                                              | 789.3923  | 2 | 4.2 | 169 | 181 | No |
|    |             |         |                                                                       | ELQAFENIEDEIK            | R | L | 95.00% | 45  |                                              | 526.5987  | 3 | 6.6 | 169 | 181 | No |
|    |             |         |                                                                       | ELQAFENIEDEIKLIGYFK      | R | S | 95.00% | 49  |                                              | 767.0740  | 3 | 8.7 | 169 | 187 | No |
|    |             |         |                                                                       | GVGFGLVDSEK              | K | D | 95.00% | 67  |                                              | 1107.5730 | 1 | 3.9 | 103 | 113 | No |
|    |             |         |                                                                       | GVGFGLVDSEK              | K | D | 95.00% | 65  |                                              | 554.2908  | 2 | 4.5 | 103 | 113 | No |
|    |             |         |                                                                       | GVGFGLVDSEKDAAVAK        | K | K | 95.00% | 92  |                                              | 831.9419  | 2 | 3.3 | 103 | 119 | No |
|    |             |         |                                                                       | GVGFGLVDSEKDAAVAK        | K | K | 95.00% | 41  |                                              | 554.9629  | 3 | 1.5 | 103 | 119 | No |
|    |             |         |                                                                       | GVGFGLVDSEKDAAVAKK       | K | L | 95.00% | 99  |                                              | 895.9917  | 2 | 5.7 | 103 | 120 | No |
|    |             |         |                                                                       | GVGFGLVDSEKDAAVAKK       | K | L | 95.00% | 52  |                                              | 597.6627  | 3 | 4.0 | 103 | 120 | No |
|    |             |         |                                                                       | GVGFGLVDSEKDAAVAKK       | K | L | 95.00% | 45  |                                              | 448.4985  | 4 | 2.9 | 103 | 120 | No |
|    |             |         |                                                                       | KLGLTEVDSMYVFK           | K | G | 95.00% | 88  | M10: Oxidation                               | 823.4346  | 2 | 6.2 | 120 | 133 | No |
|    |             |         |                                                                       | KLGLTEVDSMYVFK           | K | G | 95.00% | 49  | M10: Oxidation                               | 549.2911  | 3 | 3.9 | 120 | 133 | No |
|    |             |         |                                                                       | KLGLTEVDSMYVFK           | K | G | 95.00% | 68  |                                              | 815.4382  | 2 | 7.5 | 120 | 133 | No |
|    |             |         |                                                                       | KYEVLLALLYHEPPEDDK       | K | A | 95.00% | 57  |                                              | 687.0231  | 3 | 7.1 | 63  | 79  | No |
|    |             |         |                                                                       | KYEVLLALLYHEPPEDDK       | K | A | 95.00% | 34  |                                              | 515.5203  | 4 | 9.0 | 63  | 79  | No |
|    |             |         |                                                                       | KYEVLLALLYHEPPEDDKASQR   | K | Q | 95.00% | 121 |                                              | 1251.1490 | 2 | 8.8 | 63  | 83  | No |
|    |             |         |                                                                       | KYEVLLALLYHEPPEDDKASQR   | K | Q | 95.00% | 83  |                                              | 834.4307  | 3 | 3.5 | 63  | 83  | No |
|    |             |         |                                                                       | KYEVLLALLYHEPPEDDKASQR   | K | Q | 95.00% | 66  |                                              | 626.0768  | 4 | 6.3 | 63  | 83  | No |
|    |             |         |                                                                       | LGLTEVDSMYVFK            | K | G | 95.00% | 91  | M9: Oxidation                                | 759.3861  | 2 | 5.4 | 121 | 133 | No |
|    |             |         |                                                                       | LGLTEVDSMYVFK            | K | G | 95.00% | 75  |                                              | 751.3912  | 2 | 8.9 | 121 | 133 | No |
|    |             |         |                                                                       | QFEMEELILELAAQVLEDK      | R | G | 95.00% | 140 | M4: Oxidation                                | 1132.5830 | 2 | 9.0 | 84  | 102 | No |
|    |             |         |                                                                       | QFEMEELILELAAQVLEDK      | R | G | 95.00% | 90  | M4: Oxidation                                | 755.3885  | 3 | 5.5 | 84  | 102 | No |
|    |             |         |                                                                       | QFEMEELILELAAQVLEDK      | R | G | 95.00% | 61  |                                              | 750.0582  | 3 | 7.3 | 84  | 102 | No |
|    |             |         |                                                                       | YEVLLALLYHEPPEDDK        | K | A | 95.00% | 62  |                                              | 965.9816  | 2 | 5.8 | 64  | 79  | No |
|    |             |         |                                                                       | YEVLLALLYHEPPEDDK        | K | A | 95.00% | 47  |                                              | 644.3240  | 3 | 6.4 | 64  | 79  | No |
|    |             |         |                                                                       | YEVLLALLYHEPPEDDKASQR    | K | Q | 95.00% | 113 |                                              | 1187.1010 | 2 | 9.3 | 64  | 83  | No |
|    |             |         |                                                                       | YEVLLALLYHEPPEDDKASQR    | K | Q | 95.00% | 79  |                                              | 791.7358  | 3 | 7.9 | 64  | 83  | No |
|    |             |         |                                                                       | YEVLLALLYHEPPEDDKASQR    | K | Q | 95.00% | 37  |                                              | 594.0515  | 4 | 4.1 | 64  | 83  | No |
| 78 | IPI00011635 | BCL2L13 | ISOFORM 2 OF BCL-2-LIKE 13 PROTEIN.                                   | ALQMLLSQPVTYQAFR         | K | E | 95.00% | 74  | M4: Oxidation                                | 941.5052  | 2 | 6.9 | 122 | 137 | No |
|    |             |         |                                                                       | EESLVEELSPASEK           | R | K | 95.00% | 63  |                                              | 773.8840  | 2 | 7.3 | 418 | 431 | No |
|    |             |         |                                                                       | ELQEALPEAPAPLLPHITATSLLG |   |   |        |     |                                              |           |   |     |     |     |    |
|    |             |         |                                                                       | TR                       | R | E | 95.00% | 33  |                                              | 913.5142  | 3 | 6.4 | 333 | 358 | No |
|    |             |         |                                                                       | EPDTEVITVEK              | R | S | 95.00% | 40  |                                              | 630.3254  | 2 | 4.6 | 359 | 369 | No |

|    |                                                    |        |                                                                                                                                                                                |   |   |        |     |                |  |           |   |     |     |     |     |
|----|----------------------------------------------------|--------|--------------------------------------------------------------------------------------------------------------------------------------------------------------------------------|---|---|--------|-----|----------------|--|-----------|---|-----|-----|-----|-----|
|    |                                                    |        | ILVPLVLLR                                                                                                                                                                      | K | Q | 95.00% | 63  |                |  | 518.3710  | 2 | 4.4 | 153 | 161 | No  |
|    |                                                    |        | LSPAGEMKMPPLSEGK                                                                                                                                                               | R | S | 95.00% | 32  | M7: Oxidation, |  | 852.4273  | 2 | 7.0 | 443 | 458 | No  |
|    |                                                    |        | YVLSYLGLLSQEK                                                                                                                                                                  | K | L | 95.00% | 92  | M10: Oxidation |  | 806.4565  | 2 | 3.4 | 17  | 30  | No  |
| 79 | IPI00011770                                        | NDUFA4 | NADH DEHYDROGENASE [UBIQUINONE] 1 ALPHA SUBCOMPLEX SUBUNIT 4.                                                                                                                  | K | L | 95.00% | 57  |                |  | 611.2986  | 2 | 8.5 | 64  | 73  | No  |
|    |                                                    |        | FYSVNVVDYSK                                                                                                                                                                    | K | L | 95.00% | 57  |                |  | 611.2986  | 2 | 8.5 | 64  | 73  | No  |
|    |                                                    |        | LGPNQDYK                                                                                                                                                                       | K | F | 95.00% | 63  |                |  | 467.7371  | 2 | 3.1 | 56  | 63  | No  |
| 80 | IPI00012007; IPI00827743                           | AHCY   | ADENOSYLHOMOCYSTEINASE.; 31 KDA PROTEIN.                                                                                                                                       | R | M | 95.00% | 86  |                |  | 824.9156  | 2 | 3.0 | 152 | 166 | No  |
|    |                                                    |        | IIILAEGR                                                                                                                                                                       | R | L | 95.00% | 55  |                |  | 442.7842  | 2 | 4.0 | 336 | 343 | No  |
|    |                                                    |        | VADIGLAAWGR                                                                                                                                                                    | K | K | 95.00% | 66  |                |  | 564.8151  | 2 | 5.0 | 9   | 19  | No  |
|    |                                                    |        | VAVVAGYGDVVK                                                                                                                                                                   | K | G | 95.00% | 51  |                |  | 567.8129  | 2 | 1.8 | 215 | 226 | No  |
|    |                                                    |        | VPAINVNDVTK                                                                                                                                                                    | K | S | 95.00% | 73  |                |  | 628.8481  | 2 | 2.7 | 175 | 186 | No  |
|    |                                                    |        | YPQLLPGR                                                                                                                                                                       | K | G | 95.00% | 55  |                |  | 528.8168  | 2 | 4.7 | 143 | 151 | No  |
| 81 | IPI00012048; IPI00375531                           | NME1   | NUCLEOSIDE DIPHOSPHATE KINASE A.; NON-METASTATIC CELLS 1, PROTEIN (NM23A) EXPRESSED IN ISOFORM A.                                                                              | K | Y | 95.00% | 50  |                |  | 575.3287  | 2 | 6.3 | 57  | 66  | No  |
|    |                                                    |        | DRPFFAGLVK                                                                                                                                                                     | R | R | 95.00% | 27  |                |  | 414.7665  | 2 | 6.6 | 19  | 26  | No  |
|    |                                                    |        | GLVGEIIR                                                                                                                                                                       | R | F | 95.00% | 54  |                |  | 492.8185  | 2 | 8.4 | 19  | 27  | Yes |
|    |                                                    |        | NIHGSDSVESAEK                                                                                                                                                                  | R | E | 95.00% | 38  |                |  | 743.3703  | 2 | 9.6 | 115 | 128 | No  |
|    |                                                    |        | VMLGETNPADSKPGTIR                                                                                                                                                              | R | G | 95.00% | 49  | M2: Oxidation  |  | 901.4667  | 2 | 7.5 | 89  | 105 | Yes |
| 82 | IPI00012268                                        | PSMD2  | 26S PROTEASOME NON-ATPASE REGULATORY SUBUNIT 2.                                                                                                                                | K | E | 95.00% | 51  |                |  | 740.0431  | 3 | 1.4 | 9   | 31  | No  |
|    |                                                    |        | AVPLALALISVSNPR                                                                                                                                                                | R | L | 95.00% | 24  |                |  | 760.9694  | 2 | 9.6 | 689 | 703 | No  |
|    |                                                    |        | AVPLALALISVSNPR                                                                                                                                                                | R | L | 95.00% | 77  |                |  | 507.6469  | 3 | 5.6 | 689 | 703 | No  |
|    |                                                    |        | ELDIMEPK                                                                                                                                                                       | R | V | 95.00% | 29  | M5: Oxidation  |  | 495.7480  | 2 | 6.1 | 336 | 343 | No  |
|    |                                                    |        | FGSGSQVDSAR                                                                                                                                                                    | R | M | 95.00% | 30  |                |  | 584.2764  | 2 | 4.8 | 358 | 369 | No  |
|    |                                                    |        | LAQGLTHLKG                                                                                                                                                                     | R | G | 95.00% | 41  |                |  | 519.3112  | 2 | 3.4 | 764 | 773 | No  |
|    |                                                    |        | LLTDDGNKWLK                                                                                                                                                                    | K | N | 95.00% | 44  |                |  | 733.3956  | 2 | 9.6 | 390 | 401 | No  |
|    |                                                    |        | LNILDLSK                                                                                                                                                                       | R | F | 95.00% | 58  |                |  | 508.8060  | 2 | 4.8 | 704 | 712 | No  |
|    |                                                    |        | MLVTFDEELRPLPVSVR                                                                                                                                                              | R | V | 95.00% | 46  | M1: Oxidation  |  | 673.0356  | 3 | 5.8 | 829 | 845 | No  |
|    |                                                    |        | SETELKDTYAR                                                                                                                                                                    | K | W | 95.00% | 47  |                |  | 656.8272  | 2 | 6.1 | 546 | 556 | No  |
|    |                                                    |        | TITGFQHTTPVLLAHGER                                                                                                                                                             | K | A | 95.00% | 62  |                |  | 693.7076  | 3 | 3.9 | 861 | 879 | No  |
|    |                                                    |        | VGQAVDVVGQAGKPK                                                                                                                                                                | R | T | 95.00% | 97  |                |  | 726.9166  | 2 | 5.3 | 846 | 860 | No  |
|    |                                                    |        | VGQAVDVVGQAGKPK                                                                                                                                                                | R | T | 95.00% | 34  |                |  | 484.9455  | 3 | 2.1 | 846 | 860 | No  |
| 83 | IPI00012726; IPI00555747; IPI00642904; IPI00642944 | PABPC4 | ISOFORM 1 OF POLYADENYLATE-BINDING PROTEIN 4.; ISOFORM 2 OF POLYADENYLATE-BINDING PROTEIN 4.; POLY(A) BINDING PROTEIN, CYTOPLASMIC 4.; POLY(A) BINDING PROTEIN, CYTOPLASMIC 4. | R | G | 95.00% | 66  | M5: Oxidation  |  | 641.8240  | 2 | 3.6 | 68  | 78  | No  |
|    |                                                    |        | ALDTMNFVVIK                                                                                                                                                                    | K | V | 95.00% | 34  |                |  | 635.8217  | 2 | 2.8 | 313 | 324 | No  |
|    |                                                    |        | EFSPFGSITSAK                                                                                                                                                                   | K | V | 95.00% | 46  |                |  | 572.3324  | 2 | 3.7 | 31  | 41  | No  |
|    |                                                    |        | FSPAGPVLISIR                                                                                                                                                                   | K | V | 95.00% | 46  |                |  | 572.3324  | 2 | 3.7 | 31  | 41  | No  |
|    |                                                    |        | ITGMILLEIDNSELLHMLESPELR                                                                                                                                                       | K | S | 95.00% | 50  | M4: Oxidation, |  | 924.8050  | 3 | 7.0 | 577 | 600 | No  |
|    |                                                    |        | IVGSKPLYVALAQR                                                                                                                                                                 | R | K | 95.00% | 49  | M16: Oxidation |  | 757.9620  | 2 | 6.7 | 357 | 370 | No  |
|    |                                                    |        | IVGSKPLYVALAQR                                                                                                                                                                 | R | K | 95.00% | 33  |                |  | 505.6423  | 3 | 3.5 | 357 | 370 | No  |
|    |                                                    |        | SLGYAYVNFQQPADAER                                                                                                                                                              | R | A | 95.00% | 117 |                |  | 964.9683  | 2 | 7.5 | 51  | 67  | No  |
| 84 | IPI00012728                                        | ACSL1  | ISOFORM 1 OF LONG-CHAIN-FATTY-ACID--COA LIGASE 1.                                                                                                                              | K | A | 95.00% | 79  |                |  | 737.9163  | 2 | 5.9 | 193 | 205 | No  |
|    |                                                    |        | AELSLVFVDKPEK                                                                                                                                                                  | K | A | 95.00% | 53  |                |  | 492.2789  | 3 | 3.4 | 193 | 205 | No  |
|    |                                                    |        | AILEDMVR                                                                                                                                                                       | K | L | 95.00% | 41  | M6: Oxidation  |  | 481.7555  | 2 | 5.0 | 633 | 640 | No  |
|    |                                                    |        | DGWLHTGDIGK                                                                                                                                                                    | K | W | 95.00% | 34  |                |  | 599.8013  | 2 | 7.4 | 533 | 543 | No  |
|    |                                                    |        | DSGLKPFQVK                                                                                                                                                                     | K | G | 95.00% | 35  |                |  | 624.3368  | 2 | 1.6 | 644 | 654 | No  |
|    |                                                    |        | GITLHPELFSIDNGLLTPTMK                                                                                                                                                          | K | A | 95.00% | 57  | M20: Oxidation |  | 1157.1210 | 2 | 7.8 | 655 | 675 | No  |
|    |                                                    |        | GITLHPELFSIDNGLLTPTMK                                                                                                                                                          | K | A | 95.00% | 63  | M20: Oxidation |  | 771.7495  | 3 | 7.0 | 655 | 675 | No  |
|    |                                                    |        | GPNVFQGYLK                                                                                                                                                                     | K | D | 95.00% | 56  |                |  | 561.8044  | 2 | 5.3 | 512 | 521 | No  |
|    |                                                    |        | GPNVFQGYLKDPKAP                                                                                                                                                                | K | T | 95.00% | 64  |                |  | 767.4094  | 2 | 2.6 | 512 | 525 | No  |
|    |                                                    |        | GPNVFQGYLKDPKAP                                                                                                                                                                | K | T | 95.00% | 44  |                |  | 511.9424  | 3 | 3.0 | 512 | 525 | No  |
|    |                                                    |        | IENIYMR                                                                                                                                                                        | K | S | 95.00% | 34  | M6: Oxidation  |  | 477.7422  | 2 | 5.0 | 573 | 579 | No  |
|    |                                                    |        | IFGQANTLKR                                                                                                                                                                     | R | W | 95.00% | 54  |                |  | 624.8608  | 2 | 5.8 | 377 | 387 | No  |
|    |                                                    |        | IFGQANTLKR                                                                                                                                                                     | R | W | 95.00% | 25  |                |  | 416.9091  | 3 | 3.9 | 377 | 387 | No  |
|    |                                                    |        | IGFFQGDIR                                                                                                                                                                      | K | L | 95.00% | 64  |                |  | 526.7827  | 2 | 4.2 | 341 | 349 | No  |
|    |                                                    |        | IIVMDAYGSELVER                                                                                                                                                                 | K | G | 95.00% | 108 | M5: Oxidation  |  | 855.4506  | 2 | 8.8 | 223 | 237 | No  |
|    |                                                    |        | KPDQPYEWSYK                                                                                                                                                                    | R | Q | 95.00% | 73  |                |  | 777.3935  | 2 | 9.6 | 113 | 124 | No  |
|    |                                                    |        | LAQGEYIAPEK                                                                                                                                                                    | K | I | 95.00% | 72  |                |  | 609.8270  | 2 | 7.3 | 562 | 572 | No  |
|    |                                                    |        | LAQGEYIAPEKIENIYMR                                                                                                                                                             | K | S | 95.00% | 49  | M17: Oxidation |  | 718.7056  | 3 | 4.9 | 562 | 579 | No  |
|    |                                                    |        | LIPGLK                                                                                                                                                                         | K | I | 95.00% | 27  |                |  | 640.4440  | 1 | 6.3 | 217 | 222 | No  |
|    |                                                    |        | LLLEGVENK                                                                                                                                                                      | K | L | 95.00% | 31  |                |  | 1014.5920 | 1 | 7.8 | 208 | 216 | No  |
|    |                                                    |        | LLLEGVENK                                                                                                                                                                      | K | L | 95.00% | 57  |                |  | 507.7982  | 2 | 4.8 | 208 | 216 | No  |
|    |                                                    |        | LMVTGAAPVSATVLTFLR                                                                                                                                                             | R | A | 95.00% | 142 | M2: Oxidation  |  | 932.0304  | 2 | 6.2 | 430 | 447 | No  |

|    |                                                    |                    |                                                                                                                           |                        |   |   |        |     |                |           |   |     |     |     |    |
|----|----------------------------------------------------|--------------------|---------------------------------------------------------------------------------------------------------------------------|------------------------|---|---|--------|-----|----------------|-----------|---|-----|-----|-----|----|
|    |                                                    |                    |                                                                                                                           | LMVTGAAPVSATVLTFLR     | R | A | 95.00% | 87  | M2: Oxidation  | 621.6905  | 3 | 7.7 | 430 | 447 | No |
|    |                                                    |                    |                                                                                                                           | MPELVDFR               | R | Q | 95.00% | 56  | M1: Oxidation  | 511.7558  | 2 | 5.5 | 12  | 19  | No |
|    |                                                    |                    |                                                                                                                           | SQIDDLSTIK             | R | - | 95.00% | 54  |                | 641.8340  | 2 | 5.4 | 687 | 697 | No |
|    |                                                    |                    |                                                                                                                           | SQIDDLSTIKV            | R | - | 95.00% | 79  |                | 691.3688  | 2 | 5.9 | 687 | 698 | No |
|    |                                                    |                    |                                                                                                                           | TAEALDKDGLHTGDIGK      | K | W | 95.00% | 106 |                | 963.9886  | 2 | 6.7 | 526 | 543 | No |
|    |                                                    |                    |                                                                                                                           | TAEALDKDGLHTGDIGK      | K | W | 95.00% | 53  |                | 642.9943  | 3 | 5.6 | 526 | 543 | No |
|    |                                                    |                    |                                                                                                                           | VLQPTVPVVP             | K | L | 95.00% | 58  |                | 676.4144  | 2 | 7.9 | 357 | 368 | No |
|    |                                                    |                    |                                                                                                                           | WLLDFASK               | R | R | 95.00% | 37  |                | 490.2692  | 2 | 5.3 | 388 | 395 | No |
| 85 | IPI00012750; IPI00401105; IPI00478694; IPI00740757 | RPS25; hCG_1640785 | 40S RIBOSOMAL PROTEIN S25.; SIMILAR TO 40S RIBOSOMAL PROTEIN S25.; 14 KDA PROTEIN.; SIMILAR TO 40S RIBOSOMAL PROTEIN S25. | AALQELLSK              | R | G | 95.00% | 63  |                | 486.7945  | 2 | 8.4 | 86  | 94  | No |
|    |                                                    |                    |                                                                                                                           | DKLNNLVLFDK            | R | A | 95.00% | 54  |                | 659.8787  | 2 | 9.3 | 42  | 52  | No |
|    |                                                    |                    |                                                                                                                           | LITPAVVSER             | K | L | 95.00% | 29  |                | 542.8263  | 2 | 7.5 | 67  | 76  | No |
|    |                                                    |                    |                                                                                                                           | LNNLVLFDK              | K | A | 95.00% | 35  |                | 538.3151  | 2 | 6.6 | 43  | 51  | No |
| 86 | IPI00012912                                        | CPT2               | CARNITINE O-PALMITOYLTRANSFERASE 2, MITOCHONDRIAL PRECURSOR.                                                              | AGLLEPEVFLNPAK         | R | S | 95.00% | 41  |                | 817.9565  | 2 | 8.7 | 168 | 182 | No |
|    |                                                    |                    |                                                                                                                           | ALEDMDFALEK            | K | S | 95.00% | 50  | M5: Oxidation  | 677.8198  | 2 | 8.6 | 643 | 654 | No |
|    |                                                    |                    |                                                                                                                           | DGSTAVHFEHSGDGVAVLR    | K | F | 95.00% | 45  |                | 714.0176  | 3 | 7.4 | 363 | 382 | No |
|    |                                                    |                    |                                                                                                                           | DSTQTPAVTPQSQPATTSTVT  |   |   |        |     |                |           |   |     |     |     |    |
|    |                                                    |                    |                                                                                                                           | VQK                    | K | L | 95.00% | 41  |                | 863.4359  | 3 | 8.7 | 390 | 414 | No |
|    |                                                    |                    |                                                                                                                           | DSVVLNFPFMAFNPDPK      | R | S | 95.00% | 101 | M11: Oxidation | 1034.5040 | 2 | 7.1 | 125 | 142 | No |
|    |                                                    |                    |                                                                                                                           | ELHEQLVALDK            | K | Q | 95.00% | 37  |                | 647.8561  | 2 | 2.7 | 94  | 104 | No |
|    |                                                    |                    |                                                                                                                           | FFNEVFK                | R | D | 95.00% | 46  |                | 465.7423  | 2 | 4.7 | 383 | 389 | No |
|    |                                                    |                    |                                                                                                                           | KGNFYIFDVLDDQGNVSPSEIQ |   |   |        |     |                |           |   |     |     |     |    |
|    |                                                    |                    |                                                                                                                           | AHLK                   | R | Y | 95.00% | 67  |                | 1016.5300 | 3 | 8.5 | 248 | 274 | No |
|    |                                                    |                    |                                                                                                                           | LNFEITDALK             | K | T | 95.00% | 70  |                | 582.3218  | 2 | 3.9 | 415 | 424 | No |
|    |                                                    |                    |                                                                                                                           | SFNLLIAK               | K | D | 95.00% | 28  |                | 905.5507  | 1 | 5.1 | 355 | 362 | No |
|    |                                                    |                    |                                                                                                                           | SFNLLIAK               | K | D | 95.00% | 35  |                | 453.2788  | 2 | 4.0 | 355 | 362 | No |
|    |                                                    |                    |                                                                                                                           | SIVPTMHYQDSLPR         | R | L | 95.00% | 47  | M6: Oxidation  | 830.4202  | 2 | 9.6 | 38  | 51  | No |
|    |                                                    |                    |                                                                                                                           | YLSAQKPLLNDGQFR        | R | K | 95.00% | 43  |                | 583.9842  | 3 | 4.5 | 64  | 78  | No |
| 87 | IPI00013459; IPI00556190; IPI00791036              | NDUF5              | NADH DEHYDROGENASE [UBIQUINONE] 1 BETA SUBCOMPLEX SUBUNIT 5, MITOCHONDRIAL PRECURSOR.; NDUF5 PROTEIN.; 22 KDA PROTEIN.    | LFVIRPSR               | R | F | 95.00% | 22  |                | 494.3120  | 2 | 5.8 | 54  | 61  | No |
|    |                                                    |                    |                                                                                                                           | TMAVLQIEAEK            | R | A | 95.00% | 63  | M2: Oxidation  | 624.8351  | 2 | 9.2 | 134 | 144 | No |
|    |                                                    |                    |                                                                                                                           | TMAVLQIEAEKAELE        | R | V | 95.00% | 64  | M2: Oxidation  | 859.4701  | 2 | 9.7 | 134 | 148 | No |
|    |                                                    |                    |                                                                                                                           | TMAVLQIEAEKAELE        | R | V | 95.00% | 51  | M2: Oxidation  | 573.3135  | 3 | 5.3 | 134 | 148 | No |
| 88 | IPI00013723                                        | PIN1               | PEPTIDYL-PROLYL CIS-TRANS ISOMERASE NIMA-INTERACTING 1.                                                                   | GDLGAFSR               | R | G | 95.00% | 28  |                | 411.7118  | 2 | 5.7 | 120 | 127 | No |
|    |                                                    |                    |                                                                                                                           | GQMCKPFEDASFALR        | R | T | 95.00% | 38  | M3: Oxidation  | 580.9567  | 3 | 9.5 | 128 | 142 | No |
|    |                                                    |                    |                                                                                                                           | TGEMSGPVFTDSGIIHLR     | R | T | 95.00% | 41  | M4: Oxidation  | 682.6887  | 3 | 8.4 | 143 | 161 | No |
| 89 | IPI00013745                                        | PLCD4              | PHOSPHOLIPASE C DELTA 4.                                                                                                  | AEVQELFESFSADGQK       | R | L | 95.00% | 112 |                | 892.9255  | 2 | 4.9 | 207 | 222 | No |
|    |                                                    |                    |                                                                                                                           | AQTLLIQVISGQQLPK       | K | V | 95.00% | 82  |                | 869.0234  | 2 | 6.4 | 627 | 642 | No |
|    |                                                    |                    |                                                                                                                           | AQTLLIQVISGQQLPK       | K | V | 95.00% | 72  |                | 579.6860  | 3 | 8.4 | 627 | 642 | No |
|    |                                                    |                    |                                                                                                                           | DIQSSFHPEKPISPFK       | R | A | 95.00% | 32  |                | 928.9902  | 2 | 9.5 | 611 | 626 | No |
|    |                                                    |                    |                                                                                                                           | DIQSSFHPEKPISPFK       | R | A | 95.00% | 29  |                | 619.6602  | 3 | 5.5 | 611 | 626 | No |
|    |                                                    |                    |                                                                                                                           | EGSIVDPLVK             | K | V | 95.00% | 27  |                | 528.8030  | 2 | 3.6 | 648 | 657 | No |
|    |                                                    |                    |                                                                                                                           | EHYHFYEISSFSETK        | K | A | 95.00% | 40  |                | 635.2909  | 3 | 3.7 | 514 | 528 | No |
|    |                                                    |                    |                                                                                                                           | GLQLLVDLVTSMDHQR       | R | L | 95.00% | 44  | M12: Oxidation | 657.3442  | 3 | 7.6 | 118 | 134 | No |
|    |                                                    |                    |                                                                                                                           | GSAKPSFSISDVETIR       | R | N | 95.00% | 77  |                | 847.4455  | 2 | 4.1 | 55  | 70  | No |
|    |                                                    |                    |                                                                                                                           | GSAKPSFSISDVETIR       | R | N | 95.00% | 41  |                | 565.2995  | 3 | 3.9 | 55  | 70  | No |
|    |                                                    |                    |                                                                                                                           | LTLLEFLDFLQEEQKER      | K | D | 95.00% | 42  |                | 717.7219  | 3 | 7.5 | 223 | 239 | No |
|    |                                                    |                    |                                                                                                                           | RAEVQELFESFSADGQK      | K | L | 95.00% | 58  |                | 647.6539  | 3 | 5.5 | 206 | 222 | No |
|    |                                                    |                    |                                                                                                                           | SLAEELPLEQGFTIVFHGR    | R | R | 95.00% | 32  |                | 715.0513  | 3 | 9.1 | 80  | 98  | No |
|    |                                                    |                    |                                                                                                                           | VLVPELAMLR             | R | F | 95.00% | 27  | M8: Oxidation  | 578.8450  | 2 | 4.9 | 692 | 701 | No |
| 90 | IPI00013847                                        | UQCRC1             | UBIQUINOL-CYTOCHROME-C REDUCTASE COMPLEX CORE PROTEIN 1, MITOCHONDRIAL PRECURSOR.                                         | ADLTEYLSTHYK           | R | A | 95.00% | 90  |                | 720.8578  | 2 | 4.7 | 214 | 225 | No |
|    |                                                    |                    |                                                                                                                           | ADLTEYLSTHYK           | R | A | 95.00% | 49  |                | 480.9071  | 3 | 3.3 | 214 | 225 | No |
|    |                                                    |                    |                                                                                                                           | DVVFNYLHATAFQGTPLAQAVE |   |   |        |     |                |           |   |     |     |     |    |
|    |                                                    |                    |                                                                                                                           | GPSENV                 | R | K | 95.00% | 84  |                | 1044.2020 | 3 | 9.7 | 181 | 209 | No |
|    |                                                    |                    |                                                                                                                           | DVVFNYLHATAFQGTPLAQAVE |   |   |        |     |                |           |   |     |     |     |    |
|    |                                                    |                    |                                                                                                                           | GPSENV                 | R | K | 95.00% | 50  |                | 783.4022  | 4 | 8.2 | 181 | 209 | No |
|    |                                                    |                    |                                                                                                                           | EVESMG AHLNAYSTR       | K | E | 95.00% | 81  | M5: Oxidation  | 840.8907  | 2 | 5.0 | 112 | 126 | No |
|    |                                                    |                    |                                                                                                                           | EVESMG AHLNAYSTR       | K | E | 95.00% | 48  | M5: Oxidation  | 560.9295  | 3 | 4.6 | 112 | 126 | No |
|    |                                                    |                    |                                                                                                                           | IAEVDASVVR             | R | E | 95.00% | 63  |                | 1058.5910 | 1 | 6.1 | 433 | 442 | No |
|    |                                                    |                    |                                                                                                                           | IAEVDASVVR             | R | E | 95.00% | 89  |                | 529.7981  | 2 | 3.5 | 433 | 442 | No |



|                       |   |   |        |     |                                              |           |   |      |     |     |     |
|-----------------------|---|---|--------|-----|----------------------------------------------|-----------|---|------|-----|-----|-----|
| AMKDEEKMELQEMQLK      | R | E | 95.00% | 77  | M2: Oxidation, M8: Oxidation, M13: Oxidation | 1014.9720 | 2 | 2.9  | 134 | 149 | No  |
| AMKDEEKMELQEMQLK      | R | E | 95.00% | 67  | M2: Oxidation, M8: Oxidation, M13: Oxidation | 676.9842  | 3 | 3.7  | 134 | 149 | No  |
| AMKDEEKMELQEMQLK      | R | E | 95.00% | 61  | M8: Oxidation, M13: Oxidation                | 1006.9760 | 2 | 5.1  | 134 | 149 | No  |
| ATDAEADVASLNR         | K | R | 95.00% | 69  |                                              | 666.8254  | 2 | 2.6  | 78  | 90  | Yes |
| ATDAEADVASLNR         | K | R | 95.00% | 41  |                                              | 444.8863  | 3 | 2.9  | 78  | 90  | Yes |
| ATDAEADVASLNR         | K | I | 95.00% | 32  |                                              | 744.8780  | 2 | 5.2  | 78  | 91  | Yes |
| ATDAEADVASLNR         | K | I | 95.00% | 46  |                                              | 496.9205  | 3 | 3.5  | 78  | 91  | Yes |
| EAQEKLEQAEKK          | K | A | 95.00% | 45  |                                              | 715.8844  | 2 | 8.2  | 66  | 77  | No  |
| EDKYEIEIK             | K | L | 95.00% | 30  |                                              | 591.7847  | 2 | 7.0  | 218 | 226 | No  |
| EDKYEIEIKLLEEK        | K | L | 95.00% | 82  |                                              | 897.9592  | 2 | 5.0  | 218 | 231 | No  |
| EDKYEIEIKLLEEK        | K | L | 95.00% | 37  |                                              | 598.9751  | 3 | 4.5  | 218 | 231 | No  |
| ENAIIDRAEQAEADKK      | K | Q | 95.00% | 51  |                                              | 844.4244  | 2 | 9.3  | 16  | 30  | No  |
| ENAIIDRAEQAEADKK      | K | Q | 95.00% | 34  |                                              | 563.2828  | 3 | 4.5  | 16  | 30  | No  |
| GTEDEVEK              | K | Y | 95.00% | 44  |                                              | 453.7086  | 2 | 3.8  | 52  | 59  | No  |
| GTEDEVEKYESVVK        | K | E | 95.00% | 100 |                                              | 800.3806  | 2 | 9.0  | 52  | 65  | No  |
| GTEDEVEKYESVVK        | K | E | 95.00% | 35  |                                              | 533.9196  | 3 | 2.7  | 52  | 65  | No  |
| GTEDEVEKYESVKEAQEK    | K | L | 95.00% | 48  |                                              | 729.0127  | 3 | 3.5  | 52  | 70  | No  |
| HIAEDSDR              | K | K | 95.00% | 45  |                                              | 471.7206  | 2 | 5.6  | 153 | 160 | No  |
| IQLVVEEELDR           | R | A | 95.00% | 57  |                                              | 1243.6630 | 1 | 7.9  | 92  | 101 | Yes |
| IQLVVEEELDR           | R | A | 95.00% | 95  |                                              | 622.3312  | 2 | 0.8  | 92  | 101 | Yes |
| IQLVVEEELDRAQER       | R | L | 95.00% | 66  |                                              | 864.4579  | 2 | 8.8  | 92  | 105 | Yes |
| IQLVVEEELDRAQER       | R | L | 95.00% | 52  |                                              | 576.6364  | 3 | 0.4  | 92  | 105 | Yes |
| KATDAEADVASLNR        | K | R | 95.00% | 134 |                                              | 730.8758  | 2 | 6.3  | 77  | 90  | Yes |
| KATDAEADVASLNR        | K | R | 95.00% | 48  |                                              | 487.5850  | 3 | 3.3  | 77  | 90  | Yes |
| KATDAEADVASLNR        | K | I | 95.00% | 48  |                                              | 808.9189  | 2 | -3.5 | 77  | 91  | Yes |
| KATDAEADVASLNR        | K | I | 95.00% | 62  |                                              | 539.6207  | 3 | 6.6  | 77  | 91  | Yes |
| KATDAEADVASLNR        | K | I | 95.00% | 33  |                                              | 404.9667  | 4 | 4.7  | 77  | 91  | Yes |
| KLVILEGELER           | R | S | 95.00% | 94  |                                              | 649.8893  | 2 | 1.6  | 168 | 178 | No  |
| KLVILEGELER           | R | S | 95.00% | 72  |                                              | 433.5980  | 3 | 7.5  | 168 | 178 | No  |
| KLVILEGELERSEER       | R | A | 95.00% | 37  |                                              | 600.6729  | 3 | 9.0  | 168 | 182 | No  |
| LATALQKLEEA EK        | R | A | 95.00% | 87  |                                              | 722.4111  | 2 | 5.7  | 106 | 118 | Yes |
| LATALQKLEEA EK        | R | A | 95.00% | 38  |                                              | 481.9438  | 3 | 6.8  | 106 | 118 | Yes |
| LATALQKLEEA EKAADESER | R | G | 95.00% | 71  |                                              | 734.7194  | 3 | 7.8  | 106 | 125 | Yes |
| LATALQKLEEA EKAADESER | R | G | 95.00% | 30  |                                              | 551.2904  | 4 | 5.8  | 106 | 125 | Yes |
| LDKENAIDR             | K | A | 95.00% | 45  |                                              | 537.2878  | 2 | 8.0  | 13  | 21  | No  |
| LEEA EKAADESER        | K | G | 95.00% | 94  |                                              | 738.8469  | 2 | 2.8  | 113 | 125 | Yes |
| LEEA EKAADESER        | K | G | 95.00% | 63  |                                              | 492.8999  | 3 | 1.4  | 113 | 125 | Yes |
| LEEA EKAADESERGMK     | K | V | 95.00% | 62  | M15: Oxidation                               | 904.9289  | 2 | 9.0  | 113 | 128 | Yes |
| LEEA EKAADESERGMK     | K | V | 95.00% | 37  | M15: Oxidation                               | 603.6193  | 3 | 4.7  | 113 | 128 | Yes |
| LKEAETR               | K | A | 95.00% | 32  |                                              | 423.7403  | 2 | 4.9  | 232 | 238 | Yes |
| LKGTEDEVEKYESVVK      | K | E | 95.00% | 108 |                                              | 920.9661  | 2 | 3.4  | 50  | 65  | No  |
| LKGTEDEVEKYESVVK      | K | E | 95.00% | 50  |                                              | 614.3133  | 3 | 3.2  | 50  | 65  | No  |
| LKGTEDEVEKYESVVK      | K | E | 95.00% | 37  |                                              | 460.9861  | 4 | 1.5  | 50  | 65  | No  |
| LVILEGELER            | K | S | 95.00% | 42  |                                              | 1170.6820 | 1 | 7.1  | 169 | 178 | No  |
| LVILEGELER            | K | S | 95.00% | 85  |                                              | 585.8433  | 2 | 4.4  | 169 | 178 | No  |
| MELQEMQLK             | K | E | 95.00% | 33  | M1: Oxidation                                | 583.2861  | 2 | 3.8  | 141 | 149 | No  |
| MELQEMQLK             | K | E | 95.00% | 41  | M1: Oxidation                                | 591.2838  | 2 | 4.2  | 141 | 149 | No  |
| MELQEMQLK             | K | E | 95.00% | 41  | M1: Oxidation, M6: Oxidation                 | 591.2838  | 2 | 4.2  | 141 | 149 | No  |
| MELQEMQLK             | K | E | 95.00% | 36  | M6: Oxidation                                | 583.2852  | 2 | 2.3  | 141 | 149 | No  |
| MELQEMQLK             | K | E | 95.00% | 34  |                                              | 575.2895  | 2 | 5.3  | 141 | 149 | No  |
| MQMLKLDKENAIDR        | K | A | 95.00% | 36  | M1: Oxidation, M3: Oxidation                 | 868.9426  | 2 | 5.6  | 8   | 21  | No  |
| QLEEEQQALQK           | K | K | 95.00% | 88  |                                              | 672.3480  | 2 | 5.5  | 38  | 48  | No  |
| QLEEEQQALQK           | K | L | 95.00% | 79  |                                              | 736.3961  | 2 | 5.8  | 38  | 49  | No  |
| RIQLVEEELDR           | R | A | 95.00% | 73  |                                              | 700.3859  | 2 | 6.7  | 91  | 101 | Yes |
| RIQLVEEELDR           | R | A | 95.00% | 60  |                                              | 467.2593  | 3 | 5.4  | 91  | 101 | Yes |
| RIQLVEEELDRAQER       | R | L | 95.00% | 41  |                                              | 628.6716  | 3 | 2.7  | 91  | 105 | Yes |
| RIQLVEEELDRAQER       | R | L | 95.00% | 48  |                                              | 471.7569  | 4 | 5.3  | 91  | 105 | Yes |
| SEERA EVAESK          | R | C | 95.00% | 39  |                                              | 617.8019  | 2 | 3.7  | 179 | 189 | No  |
| SLEAQADK              | K | Y | 95.00% | 31  |                                              | 431.2221  | 2 | 5.2  | 206 | 213 | No  |
| SLEAQADKYSTK          | K | E | 95.00% | 80  |                                              | 670.8419  | 2 | 4.6  | 206 | 217 | No  |
| SLEAQADKYSTK          | K | E | 95.00% | 36  |                                              | 447.5639  | 3 | 4.6  | 206 | 217 | No  |
| TIDDLEDEVYAQK         | K | M | 95.00% | 105 |                                              | 769.8696  | 2 | 5.6  | 252 | 264 | No  |
| TIDDLEDEVYAQK         | K | M | 95.00% | 54  |                                              | 513.5820  | 3 | 4.8  | 252 | 264 | No  |

|                          |                          |      |                                                                                     |                          |          |          |        |     |           |     |     |     |     |     |
|--------------------------|--------------------------|------|-------------------------------------------------------------------------------------|--------------------------|----------|----------|--------|-----|-----------|-----|-----|-----|-----|-----|
| 95                       | IPI00014398              | FHL1 | FOUR AND A HALF LIM DOMAINS 1 VARIANT.                                              | YSESVKEAQEKLEQAEK        | K        | K        | 95.00% | 80  | 998.5045  | 2   | 6.9 | 60  | 76  | No  |
|                          |                          |      |                                                                                     | YSESVKEAQEKLEQAEK        | K        | K        | 95.00% | 32  | 666.0038  | 3   | 4.2 | 60  | 76  | No  |
|                          |                          |      |                                                                                     | YSTKEDKYEEEIK            | K        | L        | 95.00% | 67  | 831.4021  | 2   | 3.1 | 214 | 226 | No  |
|                          |                          |      |                                                                                     | YSTKEDKYEEEIK            | K        | L        | 95.00% | 31  | 554.6056  | 3   | 6.0 | 214 | 226 | No  |
|                          |                          |      |                                                                                     | AIVAGDQNVVEYK            | K        | G        | 95.00% | 80  | 653.8383  | 2   | 3.4 | 123 | 134 | No  |
|                          |                          |      |                                                                                     | HSGPSSYK                 | R        | V        | 95.00% | 34  | 431.7105  | 2   | 8.6 | 6   | 13  | No  |
|                          |                          |      |                                                                                     | KPIGADSK                 | R        | E        | 95.00% | 30  | 408.2377  | 2   | 5.8 | 61  | 68  | No  |
|                          |                          |      |                                                                                     | KPIGADSKEVHYK            | R        | N        | 95.00% | 57  | 736.4056  | 2   | 8.5 | 61  | 73  | No  |
|                          |                          |      |                                                                                     | NFVAK                    | K        | K        | 95.00% | 25  | 578.3353  | 1   | 9.0 | 231 | 235 | No  |
|                          |                          |      |                                                                                     | NPITGFGK                 | K        | G        | 95.00% | 56  | 833.4571  | 1   | 5.7 | 242 | 249 | No  |
|                          |                          |      |                                                                                     | NPITGFGK                 | K        | G        | 95.00% | 50  | 417.2305  | 2   | 1.1 | 242 | 249 | No  |
|                          |                          |      |                                                                                     | QVIGTGSFFPK              | K        | G        | 95.00% | 44  | 1180.6460 | 1   | 8.1 | 150 | 160 | No  |
|                          |                          |      |                                                                                     | QVIGTGSFFPK              | K        | G        | 95.00% | 74  | 590.8245  | 2   | 3.6 | 150 | 160 | No  |
|                          |                          |      |                                                                                     | ELFYEDR                  | R        | H        | 95.00% | 36  | 971.4569  | 1   | 9.7 | 53  | 59  | No  |
|                          |                          |      |                                                                                     | ELFYEDR                  | R        | H        | 95.00% | 55  | 486.2306  | 2   | 6.0 | 53  | 59  | No  |
| RPIVGLGGGK               | K                        | Y    | 95.00%                                                                              | 50                       | 477.3007 | 2        | 3.9    | 226 | 235       | No  |     |     |     |     |
| 96                       | IPI00014399              | FHL3 | FOUR AND A HALF LIM DOMAINS PROTEIN 3.                                              | EGNASGVSLLLEALDITLPPTRPT | K        | P        | 95.00% | 101 | 865.4687  | 3   | 8.6 | 220 | 244 | No  |
|                          |                          |      |                                                                                     | DK                       | K        | L        | 95.00% | 94  | 987.5497  | 3   | 9.3 | 220 | 247 | No  |
|                          |                          |      |                                                                                     | EGNASGVSLLLEALDITLPPTRPT | K        | L        | 95.00% | 33  | 740.9122  | 4   | 6.6 | 220 | 247 | No  |
|                          |                          |      |                                                                                     | DKPLR                    | R        | Q        | 95.00% | 74  | 657.8776  | 2   | 3.8 | 135 | 146 | Yes |
|                          |                          |      |                                                                                     | EHALLAYTLGVK             | R        | Q        | 95.00% | 44  | 438.9220  | 3   | 6.0 | 135 | 146 | Yes |
|                          |                          |      |                                                                                     | EHALLAYTLGVK             | R        | Q        | 95.00% | 44  | 438.9220  | 3   | 6.0 | 135 | 146 | Yes |
|                          |                          |      |                                                                                     | EVSAYIK                  | K        | K        | 95.00% | 27  | 809.4472  | 1   | 7.8 | 173 | 179 | No  |
|                          |                          |      |                                                                                     | IGGIGTVPVGR              | K        | V        | 95.00% | 42  | 1025.6200 | 1   | 8.7 | 256 | 266 | Yes |
|                          |                          |      |                                                                                     | IGGIGTVPVGR              | K        | V        | 95.00% | 90  | 513.3107  | 2   | 2.6 | 256 | 266 | Yes |
|                          |                          |      |                                                                                     | LPLQDVYK                 | R        | I        | 95.00% | 39  | 975.5573  | 1   | 5.8 | 248 | 255 | Yes |
|                          |                          |      |                                                                                     | LPLQDVYK                 | R        | I        | 95.00% | 61  | 488.2806  | 2   | 1.8 | 248 | 255 | Yes |
|                          |                          |      |                                                                                     | MDSTEPAYSEK              | K        | R        | 95.00% | 56  | 637.2691  | 2   | 3.5 | 155 | 165 | No  |
|                          |                          |      |                                                                                     | MDSTEPAYSEK              | K        | R        | 95.00% | 56  | 629.2739  | 2   | 7.1 | 155 | 165 | No  |
|                          |                          |      |                                                                                     | PGMVVTFAPVNIITTEVK       | R        | S        | 95.00% | 62  | 909.9955  | 2   | 8.5 | 274 | 290 | No  |
|                          |                          |      |                                                                                     | QLIVGVNK                 | K        | M        | 95.00% | 42  | 870.5441  | 1   | 3.1 | 147 | 154 | Yes |
| QLIVGVNK                 | K                        | M    | 95.00%                                                                              | 37                       | 435.7753 | 2        | 1.6    | 147 | 154       | Yes |     |     |     |     |
| QLIVGVNKMDSTEPAYSEK      | K                        | R    | 95.00%                                                                              | 37                       | 709.0242 | 3        | 3.8    | 147 | 165       | No  |     |     |     |     |
| QTVAVGVK                 | R                        | N    | 95.00%                                                                              | 38                       | 914.5709 | 1        | 3.7    | 431 | 439       | No  |     |     |     |     |
| QTVAVGVK                 | R                        | N    | 95.00%                                                                              | 43                       | 457.7881 | 2        | 0.9    | 431 | 439       | No  |     |     |     |     |
| RYDEIVK                  | K                        | E    | 95.00%                                                                              | 34                       | 461.7557 | 2        | 4.0    | 166 | 172       | No  |     |     |     |     |
| STTTGHLIYK               | K                        | C    | 95.00%                                                                              | 53                       | 560.8058 | 2        | 3.1    | 21  | 30        | Yes |     |     |     |     |
| THINIVVIGHVDSGK          | K                        | S    | 95.00%                                                                              | 58                       | 530.3015 | 3        | 4.8    | 6   | 20        | Yes |     |     |     |     |
| VETGILRPGMVVTFAPVNIITTEV | K                        | R    | S                                                                                   | 95.00%                   | 73       | 863.1512 | 3      | 8.2 | 267       | 290 | No  |     |     |     |
| VETGILRPGMVVTFAPVNIITTEV | K                        | R    | S                                                                                   | 95.00%                   | 27       | 857.8209 | 3      | 9.8 | 267       | 290 | No  |     |     |     |
| YYITIDAPGHR              | K                        | D    | 95.00%                                                                              | 79                       | 709.8791 | 2        | 4.9    | 85  | 96        | No  |     |     |     |     |
| YYITIDAPGHR              | K                        | D    | 95.00%                                                                              | 74                       | 473.5880 | 3        | 3.5    | 85  | 96        | No  |     |     |     |     |
| 98                       | IPI00014439              | QDPR | DIHYDROPTERIDINE REDUCTASE.                                                         | AALDGTGPMIGYGMAK         | K        | G        | 95.00% | 65  | 792.8792  | 2   | 6.5 | 139 | 154 | No  |
|                          |                          |      |                                                                                     | EGGLTLGAK                | K        | A        | 95.00% | 91  | 515.3052  | 2   | 7.6 | 128 | 138 | No  |
|                          |                          |      |                                                                                     | MTDSFTEQADQVTAEVGK       | K        | L        | 95.00% | 38  | 658.3036  | 3   | 7.2 | 56  | 73  | No  |
|                          |                          |      |                                                                                     | NRPSSGSLIQVVTTEGR        | K        | T        | 95.00% | 51  | 900.9895  | 2   | 8.0 | 220 | 236 | No  |
|                          |                          |      |                                                                                     | NRPSSGSLIQVVTTEGR        | K        | T        | 95.00% | 52  | 600.9953  | 3   | 7.5 | 220 | 236 | No  |
|                          |                          |      |                                                                                     | NSGMPPGAAAIAPVTLDTMP     | K        | K        | 95.00% | 59  | 809.0865  | 3   | 9.0 | 168 | 191 | No  |
|                          |                          |      |                                                                                     | NR                       | K        | K        | 95.00% | 59  | 809.0865  | 3   | 9.0 | 168 | 191 | No  |
|                          |                          |      |                                                                                     | AADESER                  | K        | G        | 95.00% | 29  | 777.3453  | 1   | 9.6 | 119 | 125 | Yes |
|                          |                          |      |                                                                                     | AEQAEADKK                | R        | A        | 95.00% | 53  | 495.2527  | 2   | 7.3 | 22  | 30  | No  |
|                          |                          |      |                                                                                     | AISEELDHALNDMTSI         | K        | -        | 95.00% | 65  | 887.9175  | 2   | 5.8 | 269 | 284 | Yes |
|                          |                          |      |                                                                                     | AISEELDHALNDMTSI         | K        | -        | 95.00% | 35  | 592.2813  | 3   | 6.4 | 269 | 284 | Yes |
|                          |                          |      |                                                                                     | AISEELDHALNDMTSI         | K        | -        | 95.00% | 44  | 879.9221  | 2   | 8.1 | 269 | 284 | Yes |
|                          |                          |      |                                                                                     | AQKDEEKMEIQEIQLK         | R        | E        | 95.00% | 88  | 988.5129  | 2   | 8.3 | 134 | 149 | No  |
|                          |                          |      |                                                                                     | AQKDEEKMEIQEIQLK         | R        | E        | 95.00% | 48  | 659.3420  | 3   | 4.6 | 134 | 149 | No  |
|                          |                          |      |                                                                                     | ATDAEADVASLNR            | K        | R        | 95.00% | 69  | 666.8254  | 2   | 2.6 | 78  | 90  | Yes |
| ATDAEADVASLNR            | K                        | R    | 95.00%                                                                              | 41                       | 444.8863 | 3        | 2.9    | 78  | 90        | Yes |     |     |     |     |
| ATDAEADVASLNR            | K                        | I    | 95.00%                                                                              | 32                       | 744.8780 | 2        | 5.2    | 78  | 91        | Yes |     |     |     |     |
| ATDAEADVASLNR            | K                        | I    | 95.00%                                                                              | 46                       | 496.9205 | 3        | 3.5    | 78  | 91        | Yes |     |     |     |     |
| DAQEKLELAEK              | K                        | K    | 95.00%                                                                              | 42                       | 637.3395 | 2        | 5.5    | 66  | 76        | Yes |     |     |     |     |
| DAQEKLELAEK              | K                        | K    | 95.00%                                                                              | 39                       | 425.2288 | 3        | 5.1    | 66  | 76        | Yes |     |     |     |     |
| DEEKMEIQEIQLK            | K                        | E    | 95.00%                                                                              | 62                       | 824.9155 | 2        | 7.6    | 137 | 149       | No  |     |     |     |     |
| 99                       | IPI00014581; IPI00296039 | TPM1 | ISOFORM 1 OF TROPOMYOSIN-1 ALPHA CHAIN.;<br>ISOFORM 4 OF TROPOMYOSIN-1 ALPHA CHAIN. | AADESER                  | K        | G        | 95.00% | 29  | 777.3453  | 1   | 9.6 | 119 | 125 | Yes |
|                          |                          |      |                                                                                     | AEQAEADKK                | R        | A        | 95.00% | 53  | 495.2527  | 2   | 7.3 | 22  | 30  | No  |
|                          |                          |      |                                                                                     | AISEELDHALNDMTSI         | K        | -        | 95.00% | 65  | 887.9175  | 2   | 5.8 | 269 | 284 | Yes |
|                          |                          |      |                                                                                     | AISEELDHALNDMTSI         | K        | -        | 95.00% | 35  | 592.2813  | 3   | 6.4 | 269 | 284 | Yes |
|                          |                          |      |                                                                                     | AISEELDHALNDMTSI         | K        | -        | 95.00% | 44  | 879.9221  | 2   | 8.1 | 269 | 284 | Yes |
|                          |                          |      |                                                                                     | AQKDEEKMEIQEIQLK         | R        | E        | 95.00% | 88  | 988.5129  | 2   | 8.3 | 134 | 149 | No  |
|                          |                          |      |                                                                                     | AQKDEEKMEIQEIQLK         | R        | E        | 95.00% | 48  | 659.3420  | 3   | 4.6 | 134 | 149 | No  |
|                          |                          |      |                                                                                     | ATDAEADVASLNR            | K        | R        | 95.00% | 69  | 666.8254  | 2   | 2.6 | 78  | 90  | Yes |
|                          |                          |      |                                                                                     | ATDAEADVASLNR            | K        | R        | 95.00% | 41  | 444.8863  | 3   | 2.9 | 78  | 90  | Yes |
|                          |                          |      |                                                                                     | ATDAEADVASLNR            | K        | I        | 95.00% | 32  | 744.8780  | 2   | 5.2 | 78  | 91  | Yes |
|                          |                          |      |                                                                                     | ATDAEADVASLNR            | K        | I        | 95.00% | 46  | 496.9205  | 3   | 3.5 | 78  | 91  | Yes |
|                          |                          |      |                                                                                     | DAQEKLELAEK              | K        | K        | 95.00% | 42  | 637.3395  | 2   | 5.5 | 66  | 76  | Yes |
|                          |                          |      |                                                                                     | DAQEKLELAEK              | K        | K        | 95.00% | 39  | 425.2288  | 3   | 5.1 | 66  | 76  | Yes |
|                          |                          |      |                                                                                     | DEEKMEIQEIQLK            | K        | E        | 95.00% | 62  | 824.9155  | 2   | 7.6 | 137 | 149 | No  |

|                      |   |   |        |     |                              |           |   |      |     |     |     |
|----------------------|---|---|--------|-----|------------------------------|-----------|---|------|-----|-----|-----|
| ENALDRAEQAEADKK      | K | A | 95.00% | 51  |                              | 844.4244  | 2 | 9.3  | 16  | 30  | No  |
| ENALDRAEQAEADKK      | K | A | 95.00% | 34  |                              | 563.2828  | 3 | 4.5  | 16  | 30  | No  |
| GTEDELDKYSEALK       | K | D | 95.00% | 100 |                              | 799.3884  | 2 | 5.7  | 52  | 65  | Yes |
| GTEDELDKYSEALKDQAEK  | K | L | 95.00% | 69  |                              | 723.6816  | 3 | 4.3  | 52  | 70  | Yes |
| HIAEDADR             | K | K | 95.00% | 31  |                              | 463.7247  | 2 | 9.0  | 153 | 160 | No  |
| HIAEDADRKYEEVAR      | K | K | 95.00% | 54  |                              | 901.4524  | 2 | 7.6  | 153 | 167 | No  |
| HIAEDADRKYEEVAR      | K | K | 95.00% | 31  |                              | 601.3011  | 3 | 2.4  | 153 | 167 | No  |
| HIAEDADRKYEEVAR      | K | K | 95.00% | 31  |                              | 451.2280  | 4 | 2.8  | 153 | 167 | No  |
| QLVEEELDR            | R | A | 95.00% | 57  |                              | 1243.6630 | 1 | 7.9  | 92  | 101 | Yes |
| QLVEEELDR            | R | A | 95.00% | 95  |                              | 622.3312  | 2 | 0.8  | 92  | 101 | Yes |
| QLVEEELDRAQER        | R | L | 95.00% | 66  |                              | 864.4579  | 2 | 8.8  | 92  | 105 | Yes |
| QLVEEELDRAQER        | R | L | 95.00% | 52  |                              | 576.6364  | 3 | 0.4  | 92  | 105 | Yes |
| KATDAEADVASLNR       | K | R | 95.00% | 134 |                              | 730.8758  | 2 | 6.3  | 77  | 90  | Yes |
| KATDAEADVASLNR       | K | R | 95.00% | 48  |                              | 487.5850  | 3 | 3.3  | 77  | 90  | Yes |
| KATDAEADVASLNR       | K | I | 95.00% | 48  |                              | 808.9189  | 2 | -3.5 | 77  | 91  | Yes |
| KATDAEADVASLNR       | K | I | 95.00% | 62  |                              | 539.6207  | 3 | 6.6  | 77  | 91  | Yes |
| KATDAEADVASLNR       | K | I | 95.00% | 33  |                              | 404.9667  | 4 | 4.7  | 77  | 91  | Yes |
| KLVIIESDLR           | R | A | 95.00% | 89  |                              | 657.8894  | 2 | 5.7  | 168 | 178 | No  |
| KLVIIESDLR           | R | A | 95.00% | 58  |                              | 438.9276  | 3 | 2.9  | 168 | 178 | No  |
| KLVIIESDLERAEEER     | R | A | 95.00% | 30  |                              | 900.5045  | 2 | 7.9  | 168 | 182 | No  |
| KLVIIESDLERAEEER     | R | A | 95.00% | 53  |                              | 600.6713  | 3 | 6.2  | 168 | 182 | No  |
| LATALQKLEEAKE        | R | A | 95.00% | 87  |                              | 722.4111  | 2 | 5.7  | 106 | 118 | Yes |
| LATALQKLEEAKE        | R | A | 95.00% | 38  |                              | 481.9438  | 3 | 6.8  | 106 | 118 | Yes |
| LATALQKLEEAKEAADESER | R | G | 95.00% | 71  |                              | 734.7194  | 3 | 7.8  | 106 | 125 | Yes |
| LATALQKLEEAKEAADESER | R | G | 95.00% | 30  |                              | 551.2904  | 4 | 5.8  | 106 | 125 | Yes |
| LDKENALDR            | K | A | 95.00% | 45  |                              | 537.2878  | 2 | 8.0  | 13  | 21  | Yes |
| LEEAKEAADESER        | K | G | 95.00% | 94  |                              | 738.8469  | 2 | 2.8  | 113 | 125 | Yes |
| LEEAKEAADESER        | K | G | 95.00% | 63  |                              | 492.8999  | 3 | 1.4  | 113 | 125 | Yes |
| LEEAKEAADESERGMK     | K | V | 95.00% | 62  | M15: Oxidation               | 904.9289  | 2 | 9.0  | 113 | 128 | Yes |
| LEEAKEAADESERGMK     | K | V | 95.00% | 37  | M15: Oxidation               | 603.6193  | 3 | 4.7  | 113 | 128 | Yes |
| LKEAETR              | K | A | 95.00% | 32  |                              | 423.7403  | 2 | 4.9  | 232 | 238 | Yes |
| LKGTDELDKYSEALK      | K | D | 95.00% | 100 |                              | 919.9786  | 2 | 5.6  | 50  | 65  | Yes |
| LKGTDELDKYSEALK      | K | D | 95.00% | 54  |                              | 613.6548  | 3 | 5.4  | 50  | 65  | Yes |
| LKGTDELDKYSEALK      | K | D | 95.00% | 40  |                              | 460.4929  | 4 | 4.8  | 50  | 65  | Yes |
| LVIIIESDLR           | K | A | 95.00% | 64  |                              | 593.8419  | 2 | 6.3  | 169 | 178 | No  |
| LVIIIESDLERAEEER     | K | A | 95.00% | 43  |                              | 836.4561  | 2 | 7.5  | 169 | 182 | No  |
| LVIIIESDLERAEEER     | K | A | 95.00% | 35  |                              | 557.9724  | 3 | 5.7  | 169 | 182 | No  |
| MEIQEIQLK            | K | E | 95.00% | 52  | M1: Oxidation                | 574.3075  | 2 | 3.2  | 141 | 149 | No  |
|                      |   |   |        |     | M1: Oxidation, M3: Oxidation | 868.9426  | 2 | 5.6  | 8   | 21  | Yes |
| MQMLKLDKENALDR       | K | A | 95.00% | 36  |                              | 651.3500  | 2 | -2.4 | 38  | 48  | No  |
| QLEDELVSLQK          | K | L | 95.00% | 70  |                              | 715.4048  | 2 | 7.9  | 38  | 49  | No  |
| QLEDELVSLQK          | K | L | 95.00% | 70  |                              | 715.4048  | 2 | 7.9  | 38  | 49  | No  |
| RIQLVEEELDR          | R | A | 95.00% | 73  |                              | 700.3859  | 2 | 6.7  | 91  | 101 | Yes |
| RIQLVEEELDR          | R | A | 95.00% | 60  |                              | 467.2593  | 3 | 5.4  | 91  | 101 | Yes |
| RIQLVEEELDRAQER      | R | L | 95.00% | 41  |                              | 628.6716  | 3 | 2.7  | 91  | 105 | Yes |
| RIQLVEEELDRAQER      | R | L | 95.00% | 48  |                              | 471.7569  | 4 | 5.3  | 91  | 105 | Yes |
| SIDDELELYAQK         | K | L | 95.00% | 104 |                              | 769.8660  | 2 | 1.0  | 252 | 264 | No  |
| SIDDELELYAQK         | K | L | 95.00% | 61  |                              | 513.5827  | 3 | 6.3  | 252 | 264 | No  |
| SKQLEDELVSLQK        | R | K | 95.00% | 113 |                              | 758.9185  | 2 | 4.4  | 36  | 48  | No  |
| SKQLEDELVSLQK        | R | K | 95.00% | 62  |                              | 506.2813  | 3 | 3.8  | 36  | 48  | No  |
| SKQLEDELVSLQK        | R | L | 95.00% | 68  |                              | 822.9703  | 2 | 9.3  | 36  | 49  | No  |
| SKQLEDELVSLQK        | R | L | 95.00% | 65  |                              | 548.9800  | 3 | 4.3  | 36  | 49  | No  |
| SKQLEDELVSLQK        | R | L | 95.00% | 33  |                              | 411.9867  | 4 | 3.5  | 36  | 49  | No  |
| SLEAQAQK             | K | Y | 95.00% | 43  |                              | 438.2304  | 2 | 6.3  | 206 | 213 | Yes |
| VLSDKLKEAETR         | K | A | 95.00% | 59  |                              | 694.8957  | 2 | 6.1  | 227 | 238 | No  |
| YSQKEDRYEEI          | K | V | 95.00% | 62  |                              | 858.9160  | 2 | 9.3  | 214 | 226 | No  |
| YSQKEDRYEEI          | K | V | 95.00% | 36  |                              | 572.9430  | 3 | 3.0  | 214 | 226 | No  |
| DLEALVTDK            | R | S | 95.00% | 50  |                              | 502.2716  | 2 | 4.1  | 388 | 396 | No  |
| FDYEGDPK             | R | T | 95.00% | 45  |                              | 542.2562  | 2 | 4.1  | 372 | 380 | No  |
| FFSNLMDSGR           | R | C | 95.00% | 57  | M6: Oxidation                | 595.2731  | 2 | 6.2  | 305 | 314 | No  |
| FNVANGGAPDVVSDK      | K | I | 95.00% | 84  |                              | 793.8935  | 2 | -1.5 | 75  | 90  | No  |
| GGEYGFGAFFDADGDR     | K | Y | 95.00% | 41  |                              | 802.8396  | 2 | 5.9  | 222 | 237 | No  |
| GLLTGPSQLK           | K | I | 95.00% | 36  |                              | 507.3061  | 2 | 4.5  | 154 | 163 | No  |
| SFIGQQFVAVGSHVYVAK   | K | T | 95.00% | 106 |                              | 963.0049  | 2 | 5.1  | 397 | 414 | No  |
| SFIGQQFVAVGSHVYVAK   | K | T | 95.00% | 45  |                              | 642.3394  | 3 | 5.5  | 397 | 414 | No  |
| TDSFEYVDPVDTVTK      | K | K | 95.00% | 76  |                              | 886.9226  | 2 | 8.0  | 415 | 430 | No  |
| TDSFEYVDPVDTVTK      | K | Q | 95.00% | 46  |                              | 950.9698  | 2 | 7.1  | 415 | 431 | No  |
| VEIVDPDIYLNLLR       | R | T | 95.00% | 110 |                              | 886.0109  | 2 | 7.4  | 130 | 144 | No  |
| VPVYETPAGWR          | K | F | 95.00% | 36  |                              | 637.8357  | 2 | 8.0  | 294 | 304 | No  |

|     |             |         |                                                                  |                         |   |   |        |     |           |   |     |     |     |     |
|-----|-------------|---------|------------------------------------------------------------------|-------------------------|---|---|--------|-----|-----------|---|-----|-----|-----|-----|
| 101 | IPI00015141 | CKMT2   | CREATINE KINASE, SARCOMERIC MITOCHONDRIAL PRECURSOR.             | DWPDAR                  | R | G | 95.00% | 44  | 759.3495  | 1 | 8.9 | 244 | 249 | Yes |
|     |             |         |                                                                  | EVENVAITALEGLK          | R | G | 95.00% | 109 | 743.4170  | 2 | 6.4 | 187 | 200 | No  |
|     |             |         |                                                                  | EVENVAITALEGLK          | R | G | 95.00% | 65  | 495.9463  | 3 | 4.4 | 187 | 200 | No  |
|     |             |         |                                                                  | EVENVAITALEGLKGDLAGR    | R | Y | 95.00% | 49  | 685.7143  | 3 | 8.9 | 187 | 206 | No  |
|     |             |         |                                                                  | GIWHNYDK                | R | T | 95.00% | 28  | 1032.4990 | 1 | 8.0 | 250 | 257 | No  |
|     |             |         |                                                                  | GIWHNYDK                | R | T | 95.00% | 41  | 516.7514  | 2 | 4.5 | 250 | 257 | No  |
|     |             |         |                                                                  | GQDIKVPPLPQFGK          | R | - | 95.00% | 47  | 540.9775  | 3 | 3.2 | 404 | 418 | No  |
|     |             |         |                                                                  | GTGGVDTAADVVDYDISNIDR   | R | I | 95.00% | 157 | 1055.0190 | 2 | 9.1 | 355 | 375 | No  |
|     |             |         |                                                                  | GTGGVDTAADVVDYDISNIDR   | R | I | 95.00% | 90  | 703.6804  | 3 | 7.3 | 355 | 375 | No  |
|     |             |         |                                                                  | GWEFMWNER               | R | L | 95.00% | 74  | 635.7739  | 2 | 6.7 | 302 | 310 | No  |
|     |             |         |                                                                  | GWEFMWNER               | R | L | 95.00% | 51  | 627.7744  | 2 | 3.5 | 302 | 310 | No  |
|     |             |         |                                                                  | HTTDLDASK               | K | I | 95.00% | 55  | 494.2451  | 2 | 7.6 | 141 | 149 | No  |
|     |             |         |                                                                  | ILENLR                  | K | L | 95.00% | 31  | 757.4597  | 1 | 3.1 | 345 | 350 | No  |
|     |             |         |                                                                  | ITQGQFDEHYVLSSR         | K | V | 95.00% | 117 | 890.4412  | 2 | 4.5 | 150 | 164 | No  |
|     |             |         |                                                                  | ITQGQFDEHYVLSSR         | K | V | 95.00% | 56  | 593.9640  | 3 | 5.6 | 150 | 164 | No  |
|     |             |         |                                                                  | LFPPSADYPDLR            | R | K | 95.00% | 64  | 695.8595  | 2 | 7.4 | 47  | 58  | No  |
|     |             |         |                                                                  | LFPPSADYPDLRK           | R | H | 95.00% | 37  | 759.9048  | 2 | 3.9 | 47  | 59  | No  |
|     |             |         |                                                                  | LIDHFLFDK               | R | P | 95.00% | 51  | 421.5542  | 3 | 3.5 | 221 | 230 | No  |
|     |             |         |                                                                  | LSEMTEQDQQR             | K | L | 95.00% | 80  | 690.8138  | 2 | 9.6 | 210 | 220 | No  |
|     |             |         |                                                                  | LSEMTEQDQQR             | K | L | 95.00% | 81  | 682.8136  | 2 | 5.6 | 210 | 220 | No  |
|     |             |         |                                                                  | REVENVAITALEGLK         | R | G | 95.00% | 120 | 821.4691  | 2 | 7.7 | 186 | 200 | No  |
|     |             |         |                                                                  | REVENVAITALEGLK         | R | G | 95.00% | 58  | 547.9806  | 3 | 5.1 | 186 | 200 | No  |
|     |             |         |                                                                  | RGTGGVDTAADVVDYDISNIDR  | K | I | 95.00% | 96  | 755.7149  | 3 | 8.0 | 354 | 375 | No  |
|     |             |         |                                                                  | TFLIWINEEDHTR           | K | V | 95.00% | 89  | 837.4237  | 2 | 6.4 | 258 | 270 | No  |
|     |             |         |                                                                  | TFLIWINEEDHTR           | K | V | 95.00% | 44  | 558.6182  | 3 | 6.0 | 258 | 270 | No  |
|     |             |         |                                                                  | TVGMVAGDEESYEVFADLFDVPI | K | L | 95.00% | 112 | 1324.1410 | 2 | 9.5 | 105 | 128 | No  |
|     |             |         |                                                                  | TVGMVAGDEESYEVFADLFDVPI | K | L | 95.00% | 98  | 883.0949  | 3 | 7.7 | 105 | 128 | No  |
|     |             |         |                                                                  | TVGMVAGDEESYEVFADLFDVPI | K | L | 95.00% | 116 | 1316.1370 | 2 | 4.3 | 105 | 128 | No  |
|     |             |         |                                                                  | TVGMVAGDEESYEVFADLFDVPI | K | L | 95.00% | 85  | 877.7638  | 3 | 8.4 | 105 | 128 | No  |
|     |             |         |                                                                  | VPPPLPQFGK              | K | - | 95.00% | 39  | 1079.6320 | 1 | 5.4 | 409 | 418 | No  |
|     |             |         |                                                                  | VPPPLPQFGK              | K | - | 95.00% | 56  | 540.3202  | 2 | 6.4 | 409 | 418 | No  |
|     |             |         |                                                                  | VPPPLPQFGKK             | K | - | 95.00% | 26  | 604.3666  | 2 | 3.9 | 409 | 419 | No  |
|     |             |         |                                                                  | VPPPLPQFGKK             | K | - | 95.00% | 32  | 403.2463  | 3 | 2.2 | 409 | 419 | No  |
| 102 | IPI00015421 | KLHL31  | KELCH-LIKE PROTEIN 31.                                           | VLVTGGYIANAYS           | R | S | 95.00% | 74  | 742.4028  | 2 | 4.6 | 468 | 481 | No  |
|     |             |         |                                                                  | VYVMGGSQLGPR            | R | G | 95.00% | 72  | 640.3309  | 2 | 5.4 | 515 | 526 | No  |
|     |             |         |                                                                  | YAADLLSNIR              | K | F | 95.00% | 52  | 568.3119  | 2 | 4.3 | 250 | 259 | No  |
| 103 | IPI00015833 | CHCHD3  | COILED-COIL-HELIX-COILED-COIL-HELIX DOMAIN-CONTAINING PROTEIN 3. | LSENVDR                 | R | M | 95.00% | 49  | 473.2579  | 2 | 7.9 | 28  | 35  | No  |
|     |             |         |                                                                  | RVAEELALEQAKK           | R | E | 95.00% | 45  | 495.6219  | 3 | 4.2 | 65  | 77  | No  |
|     |             |         |                                                                  | VAEELALEQAK             | R | K | 95.00% | 84  | 600.8314  | 2 | 6.0 | 66  | 76  | No  |
|     |             |         |                                                                  | VAEELALEQAKK            | R | E | 95.00% | 60  | 664.8806  | 2 | 8.1 | 66  | 77  | No  |
|     |             |         |                                                                  | VAEELALEQAKK            | R | E | 95.00% | 36  | 443.5868  | 3 | 1.5 | 66  | 77  | No  |
|     |             |         |                                                                  | YSGAYGASVSDEELK         | R | R | 95.00% | 115 | 788.3681  | 2 | 6.7 | 49  | 63  | No  |
|     |             |         |                                                                  | YSGAYGASVSDEELKR        | R | R | 95.00% | 98  | 866.4198  | 2 | 7.4 | 49  | 64  | No  |
| 104 | IPI00015865 | ADPRHL2 | POLY(ADP-RIBOSE) GLYCOHYDROLASE ARH3.                            | ALVQSLAK                | R | E | 95.00% | 45  | 471.8055  | 2 | 4.6 | 84  | 92  | No  |
|     |             |         |                                                                  | YGAGVTVFK               | R | K | 95.00% | 50  | 549.3073  | 2 | 6.6 | 115 | 125 | No  |
|     |             |         |                                                                  | HVQSLEPDPTGSE           | R | T | 95.00% | 55  | 853.4125  | 2 | 1.4 | 54  | 69  | No  |
|     |             |         |                                                                  | IGELLDQASVTR            | K | E | 95.00% | 78  | 651.3599  | 2 | 4.1 | 249 | 260 | No  |
|     |             |         |                                                                  | TEALYYTDDTAMAR          | R | A | 95.00% | 36  | 818.8671  | 2 | 6.0 | 70  | 83  | No  |
| 105 | IPI00015911 | DLD     | DIHYDROLIPOYL DEHYDROGENASE, MITOCHONDRIAL PRECURSOR.            | ADGGTQVIDTK             | K | N | 95.00% | 59  | 552.7858  | 2 | 8.8 | 167 | 177 | No  |
|     |             |         |                                                                  | ALTGGIAHLFK             | K | Q | 95.00% | 64  | 564.3355  | 2 | 4.7 | 133 | 143 | No  |
|     |             |         |                                                                  | EANLAASFGK              | R | S | 95.00% | 44  | 1007.5200 | 1 | 3.4 | 496 | 505 | No  |
|     |             |         |                                                                  | EANLAASFGK              | R | S | 95.00% | 64  | 504.2634  | 2 | 2.8 | 496 | 505 | No  |
|     |             |         |                                                                  | GIEMSEVR                | R | L | 95.00% | 47  | 468.7291  | 2 | 4.4 | 110 | 117 | No  |
|     |             |         |                                                                  | IDVSIEAASGK             | K | A | 95.00% | 52  | 1146.6090 | 1 | 6.8 | 289 | 300 | No  |
|     |             |         |                                                                  | IDVSIEAASGK             | K | A | 95.00% | 93  | 573.8051  | 2 | 1.4 | 289 | 300 | No  |
|     |             |         |                                                                  | IPNIYAIGDVVAGPMLAHK     | K | A | 95.00% | 93  | 998.0476  | 2 | 6.7 | 347 | 365 | No  |
|     |             |         |                                                                  | IPNIYAIGDVVAGPMLAHK     | K | A | 95.00% | 64  | 665.6996  | 3 | 4.5 | 347 | 365 | No  |
|     |             |         |                                                                  | LGADVTAVEFLGHVGGVGDMEI  | R | N | 95.00% | 100 | 844.1079  | 3 | 8.7 | 235 | 259 | No  |
|     |             |         |                                                                  | LGADVTAVEFLGHVGGVGDMEI  | R | N | 95.00% | 33  | 633.3320  | 4 | 7.3 | 235 | 259 | No  |
|     |             |         |                                                                  | SK                      | R | N | 95.00% | 33  | 633.3320  | 4 | 7.3 | 235 | 259 | No  |
|     |             |         |                                                                  | NLGLEELGIELDPR          | K | G | 95.00% | 93  | 784.4252  | 2 | 5.8 | 321 | 334 | No  |

|     |                                                    |       |                                                                                                                                                 |                        |   |   |        |     |                               |           |   |     |     |     |     |
|-----|----------------------------------------------------|-------|-------------------------------------------------------------------------------------------------------------------------------------------------|------------------------|---|---|--------|-----|-------------------------------|-----------|---|-----|-----|-----|-----|
|     |                                                    |       |                                                                                                                                                 | NLGLEELGIEDPR          | K | G | 95.00% | 47  |                               | 523.2845  | 3 | 2.9 | 321 | 334 | No  |
|     |                                                    |       |                                                                                                                                                 | SEEQKKEEGIEYK          | K | V | 95.00% | 93  |                               | 791.3902  | 2 | 4.8 | 405 | 417 | No  |
|     |                                                    |       |                                                                                                                                                 | SEEQKKEEGIEYK          | K | V | 95.00% | 42  |                               | 527.9293  | 3 | 4.5 | 405 | 417 | No  |
| 106 | IPI00015972                                        | COX6C | CYTOCHROME C OXIDASE POLYPEPTIDE VIC PRECURSOR.                                                                                                 | AGIFQSVK               | K | - | 95.00% | 37  |                               | 849.4908  | 1 | 8.7 | 68  | 75  | No  |
|     |                                                    |       |                                                                                                                                                 | AGIFQSVK               | K | - | 95.00% | 58  |                               | 425.2483  | 2 | 6.3 | 68  | 75  | No  |
|     |                                                    |       |                                                                                                                                                 | AYADFYR                | K | N | 95.00% | 40  |                               | 453.2141  | 2 | 5.1 | 48  | 54  | No  |
|     |                                                    |       |                                                                                                                                                 | KAGIFQSVK              | R | - | 95.00% | 40  |                               | 489.2972  | 2 | 8.3 | 67  | 75  | No  |
|     |                                                    |       |                                                                                                                                                 | NYDVMKDFEEMR           | R | K | 95.00% | 42  | M5: Oxidation, M11: Oxidation | 804.8406  | 2 | 3.6 | 55  | 66  | No  |
|     |                                                    |       |                                                                                                                                                 | NYDVMKDFEEMRK          | R | A | 95.00% | 40  | M5: Oxidation, M11: Oxidation | 868.8925  | 2 | 8.4 | 55  | 67  | No  |
| 107 | IPI00016006; IPI00184477; IPI00797784              | GPHN  | ISOFORM 1 OF GEPHYRIN.; ISOFORM 2 OF GEPHYRIN.; 41 KDA PROTEIN.                                                                                 | DLVQDPSLLGGTISAYK      | K | I | 95.00% | 37  |                               | 888.9811  | 2 | 8.9 | 41  | 57  | No  |
|     |                                                    |       |                                                                                                                                                 | DTASLSTTPSESPR         | R | A | 95.00% | 54  |                               | 724.8532  | 2 | 8.0 | 259 | 272 | No  |
| 108 | IPI00016077                                        | GBAS  | PROTEIN NIPSNAP2.                                                                                                                               | KNQLLLEFSFWNEPVPR      | R | S | 95.00% | 69  |                               | 706.3832  | 3 | 7.4 | 165 | 181 | No  |
|     |                                                    |       |                                                                                                                                                 | QDQNEAVGGFFSQIGQLYMVHH |   |   |        |     |                               |           |   |     |     |     |     |
|     |                                                    |       |                                                                                                                                                 | LWAYR                  | R | D | 95.00% | 57  |                               | 781.6340  | 4 | 7.3 | 214 | 240 | No  |
|     |                                                    |       |                                                                                                                                                 | SDMLLSR                | R | K | 95.00% | 64  | M3: Oxidation                 | 419.2128  | 2 | 4.4 | 158 | 164 | No  |
|     |                                                    |       |                                                                                                                                                 | SGPNIYELR              | R | S | 95.00% | 85  |                               | 524.7783  | 2 | 5.6 | 182 | 190 | No  |
|     |                                                    |       |                                                                                                                                                 | SYQLRPGTMIEWGNYWAR     | R | A | 95.00% | 55  | M9: Oxidation                 | 748.7005  | 3 | 8.9 | 191 | 208 | No  |
|     |                                                    |       |                                                                                                                                                 | YEGGYPALTEVMNK         | R | L | 95.00% | 91  | M12: Oxidation                | 794.3779  | 2 | 7.2 | 130 | 143 | No  |
|     |                                                    |       |                                                                                                                                                 | YEGGYPALTEVMNK         | R | L | 95.00% | 79  |                               | 786.3810  | 2 | 8.1 | 130 | 143 | No  |
| 109 | IPI00016342; IPI00791850; IPI00792578; IPI00795370 | RAB7A | RAS-RELATED PROTEIN RAB-7.; 9 KDA PROTEIN.; 11 KDA PROTEIN.; 9 KDA PROTEIN.                                                                     | ATIGADFLTK             | K | E | 95.00% | 43  |                               | 518.7886  | 2 | 1.2 | 39  | 48  | No  |
|     |                                                    |       |                                                                                                                                                 | DPENFPFVVLGNK          | R | I | 95.00% | 75  |                               | 738.3811  | 2 | 0.6 | 114 | 126 | No  |
|     |                                                    |       |                                                                                                                                                 | EAINVEQAFQTIAR         | K | N | 95.00% | 43  |                               | 530.6186  | 3 | 7.0 | 158 | 171 | No  |
|     |                                                    |       |                                                                                                                                                 | VIIIGDSGVGK            | K | T | 95.00% | 44  |                               | 529.3215  | 2 | 8.8 | 11  | 21  | No  |
| 110 | IPI00016346                                        | PROSC | PROLINE SYNTHETASE CO-TRANSCRIBED BACTERIAL HOMOLOG PROTEIN.                                                                                    | TFGENYVQELLEK          | R | A | 95.00% | 42  |                               | 785.3999  | 2 | 7.5 | 64  | 76  | No  |
|     |                                                    |       |                                                                                                                                                 | VMVQINTSGEESK          | K | H | 95.00% | 77  | M2: Oxidation                 | 719.3541  | 2 | 7.6 | 141 | 153 | No  |
| 111 | IPI00016457; IPI00029140; IPI00514595              | CRAT  | ISOFORM 1 OF CARNITINE O-ACETYLTRANSFERASE.; ISOFORM 3 OF CARNITINE O-ACETYLTRANSFERASE.; ISOFORM 2 OF CARNITINE O-ACETYLTRANSFERASE.           | ALQPIVSEEEWAHTK        | K | Q | 95.00% | 92  |                               | 869.4513  | 2 | 7.7 | 53  | 67  | No  |
|     |                                                    |       |                                                                                                                                                 | AYNTLIK                | K | D | 95.00% | 27  |                               | 822.4748  | 1 | 2.7 | 262 | 268 | No  |
|     |                                                    |       |                                                                                                                                                 | AYNTLIK                | K | D | 95.00% | 33  |                               | 411.7413  | 2 | 2.7 | 262 | 268 | No  |
|     |                                                    |       |                                                                                                                                                 | FNITPEIK               | R | S | 95.00% | 29  |                               | 961.5443  | 1 | 8.7 | 383 | 390 | No  |
|     |                                                    |       |                                                                                                                                                 | IWNSSLQTNKEPVGILTSNHR  | K | N | 95.00% | 78  |                               | 798.7612  | 3 | 6.2 | 236 | 256 | No  |
|     |                                                    |       |                                                                                                                                                 | IWNSSLQTNKEPVGILTSNHR  | K | N | 95.00% | 43  |                               | 599.3227  | 4 | 6.0 | 236 | 256 | No  |
|     |                                                    |       |                                                                                                                                                 | LIEGVLDK               | K | V | 95.00% | 46  |                               | 1033.6010 | 1 | 7.4 | 121 | 129 | No  |
|     |                                                    |       |                                                                                                                                                 | LIEGVLDK               | K | V | 95.00% | 54  |                               | 517.3040  | 2 | 6.4 | 142 | 150 | No  |
|     |                                                    |       |                                                                                                                                                 | LPVPLQQLDHYLK          | R | A | 95.00% | 35  |                               | 874.4987  | 2 | 8.4 | 38  | 52  | No  |
|     |                                                    |       |                                                                                                                                                 | LPVPLQQLDHYLK          | R | A | 95.00% | 54  |                               | 583.3318  | 3 | 2.9 | 17  | 31  | No  |
|     |                                                    |       |                                                                                                                                                 | LSPDAFIQMALQLAYYR      | K | I | 95.00% | 134 | M9: Oxidation                 | 1008.5260 | 2 | 9.0 | 406 | 422 | No  |
|     |                                                    |       |                                                                                                                                                 | LSPDAFIQMALQLAYYR      | K | I | 95.00% | 59  | M9: Oxidation                 | 672.6858  | 3 | 7.7 | 427 | 443 | No  |
|     |                                                    |       |                                                                                                                                                 | QDFVDLQGLR             | K | F | 95.00% | 59  |                               | 659.8456  | 2 | 5.8 | 127 | 137 | No  |
|     |                                                    |       |                                                                                                                                                 | QLVDEFQASGGVGER        | K | L | 95.00% | 131 |                               | 796.3930  | 2 | 4.1 | 68  | 82  | No  |
|     |                                                    |       |                                                                                                                                                 | QPVIYSSPGVMLPK         | R | Q | 95.00% | 86  | M12: Oxidation                | 815.9545  | 2 | 8.1 | 112 | 126 | No  |
|     |                                                    |       |                                                                                                                                                 | SASMDSLTFVK            | R | A | 95.00% | 57  | M4: Oxidation                 | 601.2963  | 2 | 6.0 | 470 | 480 | No  |
|     |                                                    |       |                                                                                                                                                 | SHVAGQMLHGGGSR         | R | L | 95.00% | 55  |                               | 697.3472  | 2 | 7.6 | 302 | 315 | No  |
|     |                                                    |       |                                                                                                                                                 | SPMVPLPMPK             | R | K | 95.00% | 31  | M3: Oxidation, M8: Oxidation  | 564.7971  | 2 | 5.8 | 370 | 379 | No  |
|     |                                                    |       |                                                                                                                                                 | TENWLSEWVK             | K | T | 95.00% | 49  |                               | 746.3747  | 2 | 9.5 | 94  | 104 | No  |
|     |                                                    |       |                                                                                                                                                 | VMIDNETLPVEYLGKK       | K | P | 95.00% | 72  | M2: Oxidation                 | 897.4612  | 2 | 8.4 | 130 | 145 | No  |
| 112 | IPI00016513                                        | RAB10 | RAS-RELATED PROTEIN RAB-10.                                                                                                                     | AFLTAEILR              | K | K | 95.00% | 76  |                               | 631.3678  | 2 | 9.5 | 162 | 172 | No  |
|     |                                                    |       |                                                                                                                                                 | FHTITTSYR              | R | G | 95.00% | 35  |                               | 644.8256  | 2 | 8.3 | 71  | 80  | No  |
|     |                                                    |       |                                                                                                                                                 | LLIIGDSGVGK            | K | T | 95.00% | 55  |                               | 536.3286  | 2 | 7.2 | 12  | 22  | No  |
|     |                                                    |       |                                                                                                                                                 | LQIWDTAGQER            | K | F | 95.00% | 51  |                               | 658.8402  | 2 | 9.5 | 60  | 70  | Yes |
|     |                                                    |       |                                                                                                                                                 | NIDEHANEDVER           | R | M | 95.00% | 62  |                               | 720.8284  | 2 | 9.2 | 106 | 117 | No  |
|     |                                                    |       |                                                                                                                                                 | TPVKEPNSENVDISSGGGVTGW |   |   |        |     |                               |           |   |     |     |     |     |
|     |                                                    |       |                                                                                                                                                 | K                      | K | S | 95.00% | 35  |                               | 786.7321  | 3 | 9.7 | 174 | 196 | No  |
| 113 | IPI00016862; IPI00759575                           | GSR   | ISOFORM MITOCHONDRIAL OF GLUTATHIONE REDUCTASE, MITOCHONDRIALPRECURSOR.; ISOFORM CYTOPLASMIC OF GLUTATHIONE REDUCTASE, MITOCHONDRIAL PRECURSOR. | ADFNTVAIHPTSSEELVTLR   | K | - | 95.00% | 54  |                               | 772.3939  | 3 | 6.0 | 502 | 522 | No  |
|     |                                                    |       |                                                                                                                                                 | ALLTPVAIAAGR           | K | K | 95.00% | 66  |                               | 576.8621  | 2 | 5.0 | 380 | 391 | No  |
|     |                                                    |       |                                                                                                                                                 | LGIQTDKGGHIVDEFQNTNVK  | K | G | 95.00% | 52  |                               | 828.7673  | 3 | 5.1 | 347 | 368 | No  |
|     |                                                    |       |                                                                                                                                                 | TLSGLEVSMVAVPGR        | K | L | 95.00% | 38  | M9: Oxidation                 | 816.9376  | 2 | 2.5 | 301 | 316 | No  |

| Accession          | Gene                     | Protein           | Residue                                                                                                                                   | Mod                      | Score                    | Count    | Label                                                                                                      | Value               | Value          | Value     | Value  | Value | Value         |           |     |     |     |     |    |
|--------------------|--------------------------|-------------------|-------------------------------------------------------------------------------------------------------------------------------------------|--------------------------|--------------------------|----------|------------------------------------------------------------------------------------------------------------|---------------------|----------------|-----------|--------|-------|---------------|-----------|-----|-----|-----|-----|----|
| 114                | IPI00016910; IPI00646839 | EIF3S8; LOC728689 | EUKARYOTIC TRANSLATION INITIATION FACTOR 3 SUBUNIT 8.; SIMILAR TO EUKARYOTIC TRANSLATION INITIATION FACTOR 3, SUBUNIT 8,110KDA ISOFORM 1. | DAHNALLDIQSSGR           | K                        | A        | 95.00%                                                                                                     | 57                  |                | 748.8801  | 2      | 4.4   | 628           | 641       | No  |     |     |     |    |
|                    |                          |                   |                                                                                                                                           | DFESHITSYK               | R                        | Q        | 95.00%                                                                                                     | 36                  |                | 613.7937  | 2      | 8.3   | 151           | 160       | No  |     |     |     |    |
|                    |                          |                   |                                                                                                                                           | ELLGQGLLLR               | K                        | S        | 95.00%                                                                                                     | 28                  |                | 556.3497  | 2      | 6.7   | 644           | 653       | No  |     |     |     |    |
|                    |                          |                   |                                                                                                                                           | FEELTNLIR                | R                        | T        | 95.00%                                                                                                     | 58                  |                | 567.8148  | 2      | 4.9   | 57            | 65        | No  |     |     |     |    |
|                    |                          |                   |                                                                                                                                           | GGVPLVK                  | R                        | E        | 95.00%                                                                                                     | 24                  |                | 669.4353  | 1      | 7.8   | 306           | 312       | No  |     |     |     |    |
|                    |                          |                   |                                                                                                                                           | IQEESLR                  | K                        | T        | 95.00%                                                                                                     | 33                  |                | 437.7324  | 2      | -7.4  | 783           | 789       | No  |     |     |     |    |
|                    |                          |                   |                                                                                                                                           | TEPTAQNNLALQLAEK         | R                        | L        | 95.00%                                                                                                     | 82                  |                | 877.9736  | 2      | 5.9   | 847           | 862       | No  |     |     |     |    |
|                    |                          |                   |                                                                                                                                           | 115                      | IPI00017283              | IARS2    | ISOLEUCYL-TRNA SYNTHETASE, MITOCHONDRIAL PRECURSOR.                                                        | AVLEEGTDVVIK        | K              | M         | 95.00% | 51    |               | 636.8583  | 2   | 2.8 | 434 | 445 | No |
| DSFLGSIPGK         | R                        | N                 | 95.00%                                                                                                                                    |                          |                          |          |                                                                                                            | 49                  |                | 510.7749  | 2      | 5.1   | 887           | 896       | No  |     |     |     |    |
| EAQNLSAMEIR        | R                        | K                 | 95.00%                                                                                                                                    |                          |                          |          |                                                                                                            | 31                  | M8: Oxidation  | 639.3149  | 2      | 4.8   | 171           | 181       | No  |     |     |     |    |
| ELSNFYFSIIK        | R                        | D                 | 95.00%                                                                                                                                    |                          |                          |          |                                                                                                            | 65                  |                | 680.8649  | 2      | 4.8   | 793           | 803       | No  |     |     |     |    |
| FLINLEGGDIR        | K                        | E                 | 95.00%                                                                                                                                    |                          |                          |          |                                                                                                            | 58                  |                | 623.8472  | 2      | 5.6   | 960           | 970       | No  |     |     |     |    |
| FLINLEGGDIREESSYK  | K                        | V                 | 95.00%                                                                                                                                    |                          |                          |          |                                                                                                            | 48                  |                | 657.3384  | 3      | 6.3   | 960           | 976       | No  |     |     |     |    |
| QQPDTLELIQK        | R                        | C                 | 95.00%                                                                                                                                    |                          |                          |          |                                                                                                            | 51                  |                | 728.8741  | 2      | 8.0   | 79            | 90        | No  |     |     |     |    |
| QWFINITDIK         | K                        | T                 | 95.00%                                                                                                                                    |                          |                          |          |                                                                                                            | 46                  |                | 639.3508  | 2      | 3.3   | 480           | 489       | No  |     |     |     |    |
| TALAEAELEYNPEHVSR  | R                        | S                 | 95.00%                                                                                                                                    |                          |                          |          |                                                                                                            | 111                 |                | 964.9793  | 2      | 8.0   | 251           | 267       | No  |     |     |     |    |
| TALAEAELEYNPEHVSR  | R                        | S                 | 95.00%                                                                                                                                    |                          |                          |          |                                                                                                            | 93                  |                | 643.6534  | 3      | 4.7   | 251           | 267       | No  |     |     |     |    |
| TKDEYLINSQTTEHIVK  | K                        | L                 | 95.00%                                                                                                                                    |                          |                          |          |                                                                                                            | 45                  |                | 673.6877  | 3      | 3.6   | 539           | 555       | No  |     |     |     |    |
| TVIVHGFTLGEK       | K                        | G                 | 95.00%                                                                                                                                    |                          |                          |          |                                                                                                            | 57                  |                | 650.8697  | 2      | 3.8   | 650           | 661       | No  |     |     |     |    |
| 116                | IPI00017334; IPI00791634 | PHB               | PROHIBITIN.; PROHIBITIN VARIANT (FRAGMENT).                                                                                               |                          |                          |          |                                                                                                            | AAIISAEGDSK         | K              | A         | 95.00% | 39    |               | 531.2806  | 2   | 5.2 | 209 | 219 | No |
|                    |                          |                   |                                                                                                                                           |                          |                          |          |                                                                                                            | AATFGLLDDVSLTHLTFGK | R              | E         | 95.00% | 45    |               | 707.0593  | 3   | 8.5 | 158 | 177 | No |
|                    |                          |                   |                                                                                                                                           |                          |                          |          |                                                                                                            | DLQNVNITLR          | K              | I         | 95.00% | 51    |               | 593.3343  | 2   | 1.2 | 84  | 93  | No |
|                    |                          |                   |                                                                                                                                           | FDAGELITQR               | R                        | E        | 95.00%                                                                                                     | 81                  |                | 575.3025  | 2      | 5.7   | 134           | 143       | No  |     |     |     |    |
|                    |                          |                   |                                                                                                                                           | IFTSIGEDYDER             | R                        | V        | 95.00%                                                                                                     | 71                  |                | 722.8407  | 2      | 9.5   | 106           | 117       | No  |     |     |     |    |
|                    |                          |                   |                                                                                                                                           | ILFRPVASQLPR             | R                        | I        | 95.00%                                                                                                     | 23                  |                | 698.9304  | 2      | 7.2   | 94            | 105       | No  |     |     |     |    |
|                    |                          |                   |                                                                                                                                           | ILFRPVASQLPR             | R                        | I        | 95.00%                                                                                                     | 36                  |                | 466.2883  | 3      | 4.5   | 94            | 105       | No  |     |     |     |    |
|                    |                          |                   |                                                                                                                                           | KLEAAEDIAYQLSR           | R                        | S        | 95.00%                                                                                                     | 35                  |                | 536.2900  | 3      | 6.3   | 240           | 253       | No  |     |     |     |    |
|                    |                          |                   |                                                                                                                                           | NITYLPAGOSVLLQLPQ        | R                        | -        | 95.00%                                                                                                     | 42                  |                | 928.0264  | 2      | 6.4   | 256           | 272       | No  |     |     |     |    |
|                    |                          |                   |                                                                                                                                           | VLPSITTEILK              | R                        | S        | 95.00%                                                                                                     | 30                  |                | 607.3773  | 2      | 4.6   | 118           | 128       | No  |     |     |     |    |
|                    |                          |                   |                                                                                                                                           | AFAAQEDLEK               | K                        | T        | 95.00%                                                                                                     | 36                  |                | 561.2786  | 2      | 1.3   | 449           | 458       | No  |     |     |     |    |
|                    |                          |                   |                                                                                                                                           | AFAAQEDLEKTEELK          | K                        | T        | 95.00%                                                                                                     | 32                  |                | 617.3270  | 3      | 5.5   | 449           | 464       | No  |     |     |     |    |
|                    |                          |                   |                                                                                                                                           | APDFVYAPR                | K                        | L        | 95.00%                                                                                                     | 81                  |                | 591.8027  | 2      | 2.3   | 264           | 273       | Yes |     |     |     |    |
|                    |                          |                   |                                                                                                                                           | EVWFFGLQYVDSK            | R                        | G        | 95.00%                                                                                                     | 76                  |                | 809.4048  | 2      | 4.0   | 41            | 53        | No  |     |     |     |    |
|                    |                          |                   |                                                                                                                                           | 117                      | IPI00017367              | RDX      | RADIXIN.                                                                                                   | FFPEDVSEELIQEITQR   | K              | L         | 95.00% | 100   |               | 1040.5250 | 2   | 9.0 | 84  | 100 | No |
| FFPEDVSEELIQEITQR  | K                        | L                 | 95.00%                                                                                                                                    |                          |                          |          |                                                                                                            | 67                  |                | 694.0181  | 3      | 7.0   | 84            | 100       | No  |     |     |     |    |
| IAQDLEMYGVNYFEIK   | K                        | N                 | 95.00%                                                                                                                                    |                          |                          |          |                                                                                                            | 73                  | M7: Oxidation  | 974.9771  | 2      | 4.9   | 194           | 209       | No  |     |     |     |    |
| IGFPWSEIR          | K                        | N                 | 95.00%                                                                                                                                    |                          |                          |          |                                                                                                            | 65                  |                | 552.7990  | 2      | 5.2   | 238           | 246       | Yes |     |     |     |    |
| KAPDFVYAPR         | K                        | L                 | 95.00%                                                                                                                                    |                          |                          |          |                                                                                                            | 47                  |                | 655.8540  | 2      | 7.8   | 263           | 273       | No  |     |     |     |    |
| KAPDFVYAPR         | K                        | L                 | 95.00%                                                                                                                                    |                          |                          |          |                                                                                                            | 43                  |                | 437.5703  | 3      | 4.2   | 263           | 273       | No  |     |     |     |    |
| LFFLQVK            | R                        | E                 | 95.00%                                                                                                                                    |                          |                          |          |                                                                                                            | 44                  |                | 447.7794  | 2      | 6.4   | 101           | 107       | Yes |     |     |     |    |
| NQEQLAAELAEFTAK    | K                        | I                 | 95.00%                                                                                                                                    |                          |                          |          |                                                                                                            | 133                 |                | 831.9247  | 2      | 4.6   | 413           | 427       | No  |     |     |     |    |
| NQEQLAAELAEFTAK    | K                        | I                 | 95.00%                                                                                                                                    |                          |                          |          |                                                                                                            | 58                  |                | 554.9526  | 3      | 4.9   | 413           | 427       | No  |     |     |     |    |
| QLFDQVVK           | K                        | T                 | 95.00%                                                                                                                                    |                          |                          |          |                                                                                                            | 42                  |                | 488.7801  | 2      | 5.5   | 28            | 35        | Yes |     |     |     |    |
| QLQALSSELAQAR      | K                        | D                 | 95.00%                                                                                                                                    |                          |                          |          |                                                                                                            | 63                  |                | 707.8934  | 2      | 9.5   | 527           | 539       | No  |     |     |     |    |
| RKPDITIEVQQMK      | R                        | A                 | 95.00%                                                                                                                                    |                          |                          |          |                                                                                                            | 37                  | M11: Oxidation | 744.9012  | 2      | 6.6   | 295           | 306       | Yes |     |     |     |    |
| RKPDITIEVQQMK      | R                        | A                 | 95.00%                                                                                                                                    |                          |                          |          |                                                                                                            | 33                  | M11: Oxidation | 496.9362  | 3      | 5.4   | 295           | 306       | Yes |     |     |     |    |
| VTTMDAELEFQIPNTTGK | R                        | Q                 | 95.00%                                                                                                                                    |                          |                          |          |                                                                                                            | 133                 | M4: Oxidation  | 1041.5160 | 2      | 8.1   | 9             | 27        | Yes |     |     |     |    |
| IFEMGPVFTL         | K                        | -                 | 95.00%                                                                                                                                    |                          |                          |          |                                                                                                            | 31                  | M4: Oxidation  | 585.3054  | 2      | 9.5   | 218           | 227       | No  |     |     |     |    |
| IFEMGPVFTL         | K                        | -                 | 95.00%                                                                                                                                    | 34                       |                          | 577.3055 | 2                                                                                                          | 5.5                 | 218            | 227       | No     |       |               |           |     |     |     |     |    |
| ILYMTDEVNDPSLTIK   | R                        | S                 | 95.00%                                                                                                                                    | 95                       | M4: Oxidation            | 934.4807 | 2                                                                                                          | 9.0                 | 83             | 98        | No     |       |               |           |     |     |     |     |    |
| ILYMTDEVNDPSLTIK   | R                        | S                 | 95.00%                                                                                                                                    | 97                       |                          | 926.4833 | 2                                                                                                          | 9.2                 | 83             | 98        | No     |       |               |           |     |     |     |     |    |
| LLDVDNR            | R                        | V                 | 95.00%                                                                                                                                    | 40                       |                          | 844.4611 | 1                                                                                                          | 9.7                 | 135            | 141       | No     |       |               |           |     |     |     |     |    |
| LLDVDNR            | R                        | V                 | 95.00%                                                                                                                                    | 41                       |                          | 422.7319 | 2                                                                                                          | 3.7                 | 135            | 141       | No     |       |               |           |     |     |     |     |    |
| LNQTTFTATR         | R                        | P                 | 95.00%                                                                                                                                    | 65                       |                          | 576.8094 | 2                                                                                                          | 8.3                 | 179            | 188       | No     |       |               |           |     |     |     |     |    |
| 118                | IPI00017510              | COX2              | CYTOCHROME C OXIDASE SUBUNIT 2.                                                                                                           | LTNTNISDAQEMETVWVILPAIIL |                          |          |                                                                                                            |                     |                |           |        |       |               |           |     |     |     |     |    |
|                    |                          |                   |                                                                                                                                           | VLIALPSLR                | K                        | I        | 95.00%                                                                                                     | 31                  |                | 913.0215  | 4      | 9.4   | 50            | 82        | No  |     |     |     |    |
|                    |                          |                   |                                                                                                                                           | MMITSQDVLHSHWAVPTLGLK    | R                        | T        | 95.00%                                                                                                     | 49                  | M2: Oxidation  | 748.3959  | 3      | 6.7   | 152           | 171       | No  |     |     |     |    |
|                    |                          |                   |                                                                                                                                           | MMITSQDVLHSHWAVPTLGLK    | R                        | T        | 95.00%                                                                                                     | 65                  |                | 743.0660  | 3      | 9.1   | 152           | 171       | No  |     |     |     |    |
|                    |                          |                   |                                                                                                                                           | VVLPPIEAPIR              | R                        | M        | 95.00%                                                                                                     | 36                  |                | 1106.7010 | 1      | 6.5   | 142           | 151       | No  |     |     |     |    |
|                    |                          |                   |                                                                                                                                           | VVLPPIEAPIR              | R                        | M        | 95.00%                                                                                                     | 59                  |                | 553.8561  | 2      | 9.5   | 142           | 151       | No  |     |     |     |    |
|                    |                          |                   |                                                                                                                                           | 119                      | IPI00017726; IPI00336094 | HSD17B10 | ISOFORM 1 OF 3-HYDROXYACYL-COA DEHYDROGENASE TYPE-2.; ISOFORM 2 OF 3-HYDROXYACYL-COA DEHYDROGENASE TYPE-2. | DLAPIGIR            | R              | V         | 95.00% | 25    |               | 427.7598  | 2   | 1.9 | 185 | 192 | No |
|                    |                          |                   |                                                                                                                                           |                          |                          |          |                                                                                                            | GGIVGMTLPIAR        | K              | D         | 95.00% | 49    | M6: Oxidation | 600.8486  | 2   | 9.7 | 173 | 184 | No |

|  |  |  |  |                          |   |   |        |     |               |  |           |   |     |     |     |    |
|--|--|--|--|--------------------------|---|---|--------|-----|---------------|--|-----------|---|-----|-----|-----|----|
|  |  |  |  | GQHTLEDFQR               | K | V | 95.00% | 58  |               |  | 666.3260  | 2 | 7.2 | 106 | 116 | No |
|  |  |  |  | LVAGEMGQNEPDQGGQR        | R | G | 95.00% | 41  | M6: Oxidation |  | 601.2804  | 3 | 6.4 | 131 | 147 | No |
|  |  |  |  | LVGGGASAVLLDLPNSGGEAQA   |   |   |        |     |               |  |           |   |     |     |     |    |
|  |  |  |  | K                        | R | K | 95.00% | 78  |               |  | 1098.0980 | 2 | 9.9 | 30  | 52  | No |
|  |  |  |  | AKDINQEVYNFLATAGAK       | R | Y | 95.00% | 137 |               |  | 977.0128  | 2 | 4.9 | 143 | 160 | No |
|  |  |  |  | AKDINQEVYNFLATAGAK       | R | Y | 95.00% | 70  |               |  | 651.6774  | 3 | 4.2 | 143 | 160 | No |
|  |  |  |  | ATIERDGYAQLR             | R | D | 95.00% | 34  |               |  | 502.6116  | 3 | 7.5 | 450 | 462 | No |
|  |  |  |  | DGYAQLR                  | R | D | 95.00% | 50  |               |  | 935.4977  | 1 | 2.7 | 430 | 437 | No |
|  |  |  |  | DGYAQLR                  | R | D | 95.00% | 55  |               |  | 468.2527  | 2 | 2.7 | 455 | 462 | No |
|  |  |  |  | DINQEVYNFLATAGAK         | K | Y | 95.00% | 128 |               |  | 877.4463  | 2 | 4.9 | 145 | 160 | No |
|  |  |  |  | DINQEVYNFLATAGAK         | K | Y | 95.00% | 82  |               |  | 585.3013  | 3 | 6.9 | 145 | 160 | No |
|  |  |  |  | DLEDLQILIK               | K | V | 95.00% | 81  |               |  | 600.3510  | 2 | 4.3 | 578 | 587 | No |
|  |  |  |  | DSSGQHVDVSPTSQR          | K | L | 95.00% | 90  |               |  | 800.3758  | 2 | 4.6 | 575 | 589 | No |
|  |  |  |  | DSSGQHVDVSPTSQR          | K | L | 95.00% | 69  |               |  | 533.9194  | 3 | 3.9 | 575 | 589 | No |
|  |  |  |  | EDIANLADEFK              | R | D | 95.00% | 59  |               |  | 632.8101  | 2 | 4.8 | 313 | 323 | No |
|  |  |  |  | EGWPLDIR                 | K | V | 95.00% | 72  |               |  | 493.2605  | 2 | 2.5 | 396 | 403 | No |
|  |  |  |  | EHAALEPR                 | R | H | 95.00% | 28  |               |  | 461.7441  | 2 | 6.2 | 697 | 704 | No |
|  |  |  |  | FNPETDYLGTGDK            | K | K | 95.00% | 90  |               |  | 779.3619  | 2 | 5.5 | 507 | 520 | No |
|  |  |  |  | FNPETDYLGTGDKK           | K | F | 95.00% | 91  |               |  | 843.4083  | 2 | 3.8 | 532 | 546 | No |
|  |  |  |  | FNPETDYLGTGDKK           | K | F | 95.00% | 39  |               |  | 562.6083  | 3 | 4.1 | 532 | 546 | No |
|  |  |  |  | FRLEAPDADELPK            | K | G | 95.00% | 57  |               |  | 750.8925  | 2 | 4.6 | 522 | 534 | No |
|  |  |  |  | FRLEAPDADELPK            | K | G | 95.00% | 79  |               |  | 500.9310  | 3 | 4.9 | 547 | 559 | No |
|  |  |  |  | FRLEAPDADELPKGEFDPGQDT   |   |   |        |     |               |  |           |   |     |     |     |    |
|  |  |  |  | YQHPPK                   | K | D | 95.00% | 75  |               |  | 1066.5180 | 3 | 6.1 | 522 | 549 | No |
|  |  |  |  | FRLEAPDADELPKGEFDPGQDT   |   |   |        |     |               |  |           |   |     |     |     |    |
|  |  |  |  | YQHPPK                   | K | D | 95.00% | 52  |               |  | 800.1395  | 4 | 5.0 | 547 | 574 | No |
|  |  |  |  | FRLEAPDADELPKGEFDPGQDT   |   |   |        |     |               |  |           |   |     |     |     |    |
|  |  |  |  | YQHPPK                   | K | D | 95.00% | 37  |               |  | 640.3125  | 5 | 4.0 | 522 | 549 | No |
|  |  |  |  | GEFDPGQDTYQHPPK          | K | D | 95.00% | 48  |               |  | 858.3895  | 2 | 2.5 | 535 | 549 | No |
|  |  |  |  | GHLDNISNLLIGAINIENGK     | R | A | 95.00% | 151 |               |  | 1110.1040 | 2 | 9.7 | 633 | 653 | No |
|  |  |  |  | GHLDNISNLLIGAINIENGK     | R | A | 95.00% | 72  |               |  | 740.4041  | 3 | 8.3 | 633 | 653 | No |
|  |  |  |  | HPNGTQETILLNHTFNETQIEWF  |   |   |        |     |               |  |           |   |     |     |     |    |
|  |  |  |  | R                        | K | A | 95.00% | 55  |               |  | 975.8236  | 3 | 9.2 | 769 | 792 | No |
|  |  |  |  | HPNGTQETILLNHTFNETQIEWF  |   |   |        |     |               |  |           |   |     |     |     |    |
|  |  |  |  | R                        | K | A | 95.00% | 54  |               |  | 732.1179  | 4 | 6.8 | 769 | 792 | No |
|  |  |  |  | IHPVDKLTIQGLK            | K | D | 95.00% | 22  |               |  | 731.4466  | 2 | 3.8 | 743 | 755 | No |
|  |  |  |  | IHPVDKLTIQGLK            | K | D | 95.00% | 41  |               |  | 487.9670  | 3 | 3.8 | 743 | 755 | No |
|  |  |  |  | IVYGHLLDDPASQEIER        | K | G | 95.00% | 93  |               |  | 921.4598  | 2 | 4.5 | 69  | 84  | No |
|  |  |  |  | IVYGHLLDDPASQEIER        | K | G | 95.00% | 70  |               |  | 614.6423  | 3 | 4.1 | 69  | 84  | No |
|  |  |  |  | KQGLLPLTFADPADYNK        | K | I | 95.00% | 72  |               |  | 946.0107  | 2 | 8.9 | 726 | 742 | No |
|  |  |  |  | KQGLLPLTFADPADYNK        | K | I | 95.00% | 53  |               |  | 631.0071  | 3 | 4.6 | 726 | 742 | No |
|  |  |  |  | LEAPDADELPK              | R | G | 95.00% | 44  |               |  | 599.3057  | 2 | 2.4 | 524 | 534 | No |
|  |  |  |  | LEAPDADELPKGEFDPGQDTYQ   |   |   |        |     |               |  |           |   |     |     |     |    |
|  |  |  |  | HPPK                     | R | D | 95.00% | 65  |               |  | 965.4617  | 3 | 7.3 | 549 | 574 | No |
|  |  |  |  | LNRPLTSEK                | R | I | 95.00% | 33  |               |  | 585.8486  | 2 | 3.9 | 59  | 68  | No |
|  |  |  |  | LQLLEPFDK                | R | W | 95.00% | 47  |               |  | 551.8143  | 2 | 5.2 | 590 | 598 | No |
|  |  |  |  | LQLLEPFDKWDGK            | R | D | 95.00% | 33  |               |  | 794.9290  | 2 | 7.7 | 590 | 602 | No |
|  |  |  |  | LQLLEPFDKWDGKDLEDLQILIK  | R | V | 95.00% | 63  |               |  | 923.8500  | 3 | 9.5 | 590 | 612 | No |
|  |  |  |  | LTGSLSGWSSPK             | K | D | 95.00% | 82  |               |  | 610.3224  | 2 | 3.9 | 234 | 245 | No |
|  |  |  |  | LTIQGLKDFTPGKPLK         | K | C | 95.00% | 29  |               |  | 586.0201  | 3 | 4.0 | 749 | 764 | No |
|  |  |  |  | NAVTFEQFGVPTAR           | R | Y | 95.00% | 111 |               |  | 801.4012  | 2 | 1.3 | 634 | 648 | No |
|  |  |  |  | NAVTFEQFGVPTAR           | R | Y | 95.00% | 44  |               |  | 534.6039  | 3 | 2.3 | 634 | 648 | No |
|  |  |  |  | NDANPETHAFVTSPEIVTALAIAG |   |   |        |     |               |  |           |   |     |     |     |    |
|  |  |  |  | TLK                      | R | F | 95.00% | 102 |               |  | 927.4931  | 3 | 6.1 | 480 | 506 | No |
|  |  |  |  | NDANPETHAFVTSPEIVTALAIAG |   |   |        |     |               |  |           |   |     |     |     |    |
|  |  |  |  | TLK                      | R | F | 95.00% | 49  |               |  | 695.8743  | 4 | 9.7 | 505 | 531 | No |
|  |  |  |  | NTIVTSYNR                | K | N | 95.00% | 44  |               |  | 1067.5550 | 1 | 6.3 | 491 | 499 | No |
|  |  |  |  | NTIVTSYNR                | K | N | 95.00% | 49  |               |  | 534.2795  | 2 | 2.6 | 491 | 499 | No |
|  |  |  |  | QGLLPLTFADPADYNK         | K | I | 95.00% | 85  |               |  | 881.9586  | 2 | 4.2 | 702 | 717 | No |
|  |  |  |  | QGLLPLTFADPADYNK         | K | I | 95.00% | 43  |               |  | 588.3088  | 3 | 5.1 | 702 | 717 | No |
|  |  |  |  | RLNRPLTSEK               | K | I | 95.00% | 30  |               |  | 663.8987  | 2 | 2.8 | 58  | 68  | No |
|  |  |  |  | RLNRPLTSEK               | K | I | 95.00% | 26  |               |  | 442.9345  | 3 | 1.5 | 58  | 68  | No |
|  |  |  |  | SQFTITPGSEQIR            | K | A | 95.00% | 84  |               |  | 732.3802  | 2 | 2.2 | 412 | 424 | No |
|  |  |  |  | TGREDIANLADEFK           | K | D | 95.00% | 82  |               |  | 789.8954  | 2 | 4.2 | 310 | 323 | No |
|  |  |  |  | TGREDIANLADEFK           | K | D | 95.00% | 35  |               |  | 526.9322  | 3 | 2.9 | 310 | 323 | No |
|  |  |  |  | VAEKEGWPLDIR             | K | V | 95.00% | 52  |               |  | 706.8859  | 2 | 7.1 | 392 | 403 | No |
|  |  |  |  | VAEKEGWPLDIR             | K | V | 95.00% | 52  |               |  | 471.5920  | 3 | 4.5 | 392 | 403 | No |

120 IPI00017855; IPI00790739

ACO2

ACONITATE HYDRATASE, MITOCHONDRIAL  
 PRECURSOR.; ACONITASE 2, MITOCHONDRIAL.

|     |                                                       |  |      |                                                                                        |   |   |        |     |                                   |           |   |      |     |     |    |
|-----|-------------------------------------------------------|--|------|----------------------------------------------------------------------------------------|---|---|--------|-----|-----------------------------------|-----------|---|------|-----|-----|----|
|     |                                                       |  |      | VAGILTVK                                                                               | K | G | 95.00% | 32  |                                   | 800.5273  | 1 | 3.2  | 251 | 258 | No |
|     |                                                       |  |      | VAGILTVK                                                                               | K | G | 95.00% | 65  |                                   | 400.7680  | 2 | 4.3  | 251 | 258 | No |
|     |                                                       |  |      | VAMQDATAQMAMLQFISSGLSK                                                                 | R | V | 95.00% | 38  | M10: Oxidation,<br>M12: Oxidation | 787.3857  | 3 | 4.9  | 96  | 117 | No |
|     |                                                       |  |      | VAMQDATAQMAMLQFISSGLSK                                                                 | R | V | 95.00% | 70  | M3: Oxidation,<br>M10: Oxidation  | 787.3857  | 3 | 4.9  | 96  | 117 | No |
|     |                                                       |  |      | VAMQDATAQMAMLQFISSGLSK                                                                 | R | V | 95.00% | 115 | M3: Oxidation,<br>M10: Oxidation  | 1188.5750 | 2 | 7.0  | 96  | 117 | No |
|     |                                                       |  |      | VAMQDATAQMAMLQFISSGLSK                                                                 | R | V | 95.00% | 74  | M3: Oxidation,<br>M10: Oxidation  | 792.7177  | 3 | 5.3  | 96  | 117 | No |
|     |                                                       |  |      | VAMQDATAQMAMLQFISSGLSK                                                                 | R | V | 95.00% | 118 | M3: Oxidation,<br>M10: Oxidation  | 1188.5750 | 2 | 7.5  | 96  | 117 | No |
|     |                                                       |  |      | VAMQDATAQMAMLQFISSGLSK                                                                 | R | V | 95.00% | 83  | M12: Oxidation,<br>M3: Oxidation  | 792.7178  | 3 | 5.5  | 96  | 117 | No |
|     |                                                       |  |      | VAMQDATAQMAMLQFISSGLSK                                                                 | R | V | 95.00% | 49  | M12: Oxidation                    | 787.3857  | 3 | 4.9  | 96  | 117 | No |
|     |                                                       |  |      | VAMSHFEPNEYHYDLLEK                                                                     | K | N | 95.00% | 78  | M3: Oxidation                     | 1176.0660 | 2 | 9.3  | 32  | 50  | No |
|     |                                                       |  |      | VAMSHFEPNEYHYDLLEK                                                                     | K | N | 95.00% | 70  | M3: Oxidation                     | 784.3799  | 3 | 9.6  | 32  | 50  | No |
|     |                                                       |  |      | VAMSHFEPNEYHYDLLEK                                                                     | K | N | 95.00% | 59  |                                   | 779.0442  | 3 | 4.3  | 32  | 50  | No |
|     |                                                       |  |      | WDGKDLEDLQILK                                                                          | K | V | 95.00% | 55  |                                   | 562.6464  | 3 | 7.0  | 599 | 612 | No |
|     |                                                       |  |      | WVIGDENYEGGSSR                                                                         | R | E | 95.00% | 111 |                                   | 834.3922  | 2 | 6.0  | 682 | 696 | No |
|     |                                                       |  |      | YGVGFVK                                                                                | K | P | 95.00% | 30  |                                   | 428.7232  | 2 | 3.4  | 161 | 167 | No |
| 121 | IPI00018206                                           |  | GOT2 | ASPARTATE AMINOTRANSFERASE,<br>MITOCHONDRIAL PRECURSOR.                                |   |   |        |     |                                   |           |   |      |     |     |    |
|     |                                                       |  |      | ASAEALGENSEVLK                                                                         | K | S | 95.00% | 106 |                                   | 765.9072  | 2 | 3.2  | 108 | 122 | No |
|     |                                                       |  |      | ASAEALGENSEVLK                                                                         | K | S | 95.00% | 82  |                                   | 510.9415  | 3 | 4.8  | 108 | 122 | No |
|     |                                                       |  |      | DAGMQLGGYR                                                                             | R | Y | 95.00% | 36  | M4: Oxidation                     | 1154.5350 | 1 | 7.3  | 171 | 180 | No |
|     |                                                       |  |      | DAGMQLGGYR                                                                             | R | Y | 95.00% | 78  | M4: Oxidation                     | 577.7673  | 2 | 0.2  | 171 | 180 | No |
|     |                                                       |  |      | DAGMQLGGYR                                                                             | R | Y | 95.00% | 71  |                                   | 569.7708  | 2 | 1.8  | 171 | 180 | No |
|     |                                                       |  |      | DDNGKPYVLPVSR                                                                          | R | K | 95.00% | 52  |                                   | 730.3827  | 2 | 2.0  | 69  | 81  | No |
|     |                                                       |  |      | DDNGKPYVLPVSR                                                                          | R | K | 95.00% | 32  |                                   | 487.2585  | 3 | 3.6  | 69  | 81  | No |
|     |                                                       |  |      | EFISIYMTK                                                                              | K | D | 95.00% | 31  | M6: Oxidation                     | 1034.4900 | 1 | 3.3  | 397 | 404 | No |
|     |                                                       |  |      | EFISIYMTK                                                                              | K | D | 95.00% | 42  | M6: Oxidation                     | 517.7492  | 2 | 3.5  | 397 | 404 | No |
|     |                                                       |  |      | EFISIYMTK                                                                              | K | D | 95.00% | 35  |                                   | 509.7526  | 2 | 5.3  | 397 | 404 | No |
|     |                                                       |  |      | FVTVQTIISGTALR                                                                         | R | I | 95.00% | 114 |                                   | 725.4075  | 2 | 0.3  | 126 | 139 | No |
|     |                                                       |  |      | FVTVQTIISGTALR                                                                         | R | I | 95.00% | 48  |                                   | 483.9423  | 3 | 3.2  | 126 | 139 | No |
|     |                                                       |  |      | IAAAILNTPDLR                                                                           | R | K | 95.00% | 55  |                                   | 1267.7470 | 1 | 7.7  | 326 | 337 | No |
|     |                                                       |  |      | IAAAILNTPDLR                                                                           | R | K | 95.00% | 82  |                                   | 634.3755  | 2 | 4.5  | 326 | 337 | No |
|     |                                                       |  |      | IAAAILNTPDLRK                                                                          | R | Q | 95.00% | 75  |                                   | 698.4230  | 2 | 4.1  | 326 | 338 | No |
|     |                                                       |  |      | IAAAILNTPDLRK                                                                          | R | Q | 95.00% | 50  |                                   | 465.9505  | 3 | 2.4  | 326 | 338 | No |
|     |                                                       |  |      | IGASFLQR                                                                               | R | F | 95.00% | 31  |                                   | 891.5037  | 1 | -1.8 | 140 | 147 | No |
|     |                                                       |  |      | IGASFLQR                                                                               | R | F | 95.00% | 77  |                                   | 446.2567  | 2 | 0.4  | 140 | 147 | No |
|     |                                                       |  |      | ILIRPMYSNPPLNGAR                                                                       | K | I | 95.00% | 35  | M6: Oxidation                     | 914.5048  | 2 | 6.1  | 310 | 325 | No |
|     |                                                       |  |      | ILIRPMYSNPPLNGAR                                                                       | K | I | 95.00% | 35  | M6: Oxidation                     | 610.0030  | 3 | 1.6  | 310 | 325 | No |
|     |                                                       |  |      | ISVAGVTSSNVGYLAHAHQVTK                                                                 | R | - | 95.00% | 114 |                                   | 1176.6480 | 2 | 9.0  | 408 | 430 | No |
|     |                                                       |  |      | ISVAGVTSSNVGYLAHAHQVTK                                                                 | R | - | 95.00% | 62  |                                   | 784.7670  | 3 | 7.6  | 408 | 430 | No |
|     |                                                       |  |      | ISVAGVTSSNVGYLAHAHQVTK                                                                 | R | - | 95.00% | 43  |                                   | 588.8259  | 4 | 5.3  | 408 | 430 | No |
|     |                                                       |  |      | KMNLGVGAYR                                                                             | K | D | 95.00% | 48  | M2: Oxidation                     | 562.7993  | 2 | 1.7  | 59  | 68  | No |
|     |                                                       |  |      | KQLWQEVK                                                                               | R | G | 95.00% | 46  |                                   | 529.8041  | 2 | 0.3  | 338 | 345 | No |
|     |                                                       |  |      | MNLGVGAYR                                                                              | K | D | 95.00% | 87  | M1: Oxidation                     | 498.7522  | 2 | 2.9  | 60  | 68  | No |
|     |                                                       |  |      | MNLGVGAYR                                                                              | K | D | 95.00% | 61  |                                   | 490.7537  | 2 | 0.8  | 60  | 68  | No |
|     |                                                       |  |      | MNLGVGAYRDDNGKPYVLPVSR                                                                 | R |   |        |     |                                   |           |   |      |     |     |    |
|     |                                                       |  |      | NLFAFFDMAYQGFASGDGDKDA                                                                 | K | K | 95.00% | 52  | M1: Oxidation                     | 813.0864  | 3 | 5.7  | 60  | 81  | No |
|     |                                                       |  |      | WAVR                                                                                   | R | H | 95.00% | 113 | M8: Oxidation                     | 972.4512  | 3 | 9.6  | 237 | 262 | No |
|     |                                                       |  |      | NMGLYGER                                                                               | K | V | 95.00% | 62  | M2: Oxidation                     | 478.2204  | 2 | 2.4  | 280 | 287 | No |
|     |                                                       |  |      | PMYSNPPLNGAR                                                                           | R | I | 95.00% | 35  | M2: Oxidation                     | 666.8265  | 2 | 6.0  | 314 | 325 | No |
|     |                                                       |  |      | PTWGNHTPIFR                                                                            | K | D | 95.00% | 61  |                                   | 663.3451  | 2 | 5.1  | 160 | 170 | No |
|     |                                                       |  |      | QWLQEVK                                                                                | K | G | 95.00% | 35  |                                   | 465.7574  | 2 | 2.3  | 339 | 345 | No |
|     |                                                       |  |      | TQLVSNLK                                                                               | R | K | 95.00% | 35  |                                   | 451.7707  | 2 | 2.6  | 356 | 363 | No |
|     |                                                       |  |      | TQLVSNLKK                                                                              | R | E | 95.00% | 24  |                                   | 515.8180  | 2 | 1.9  | 356 | 364 | No |
|     |                                                       |  |      | ISOFORM 1 OF HEXOKINASE-1.; ISOFORM 2 OF<br>HEXOKINASE-1.; ISOFORM 3 OF HEXOKINASE-1.; |   |   |        |     |                                   |           |   |      |     |     |    |
|     |                                                       |  |      | ISOFORM 4 OF HEXOKINASE-1.                                                             |   |   |        |     |                                   |           |   |      |     |     |    |
|     |                                                       |  |      | AEMELGLR                                                                               | R | K | 95.00% | 36  | M3: Oxidation                     | 467.7395  | 2 | 4.5  | 497 | 504 | No |
| 122 | IPI00018246; IPI00220663; IPI00220665;<br>IPI00220667 |  | HK1  | ASGVEGADVVK                                                                            | K | L | 95.00% | 34  |                                   | 516.2748  | 2 | 4.1  | 181 | 191 | No |

|     |                          |       |                                                    |                       |   |   |        |     |                              |           |   |     |     |     |    |
|-----|--------------------------|-------|----------------------------------------------------|-----------------------|---|---|--------|-----|------------------------------|-----------|---|-----|-----|-----|----|
|     |                          |       |                                                    | DFNPTATVK             | R | M | 95.00% | 29  |                              | 992.5108  | 1 | 5.4 | 58  | 66  | No |
|     |                          |       |                                                    | DMLLEVK               | K | K | 95.00% | 37  | M2: Oxidation                | 432.2330  | 2 | 3.5 | 486 | 492 | No |
|     |                          |       |                                                    | FKASGVGADVVK          | R | L | 95.00% | 29  |                              | 653.8574  | 2 | 4.8 | 179 | 191 | No |
|     |                          |       |                                                    | FLLSESGSGK            | R | G | 95.00% | 41  |                              | 1024.5370 | 1 | 5.5 | 446 | 455 | No |
|     |                          |       |                                                    | FLLSESGSGK            | R | G | 95.00% | 64  |                              | 512.7718  | 2 | 4.2 | 446 | 455 | No |
|     |                          |       |                                                    | FLSQIESDR             | K | L | 95.00% | 60  |                              | 547.7809  | 2 | 5.1 | 790 | 798 | No |
|     |                          |       |                                                    | FLSQIESDRLALLQVR      | K | A | 95.00% | 31  |                              | 630.0289  | 3 | 2.8 | 786 | 801 | No |
|     |                          |       |                                                    | FNTSDVSAIEK           | K | N | 95.00% | 64  |                              | 605.8042  | 2 | 4.1 | 334 | 344 | No |
|     |                          |       |                                                    | GAALITAVGVR           | K | L | 95.00% | 84  |                              | 514.3193  | 2 | 4.2 | 904 | 914 | No |
|     |                          |       |                                                    | GAAMVTAVAYR           | K | L | 95.00% | 55  | M4: Oxidation                | 563.2930  | 2 | 4.9 | 456 | 466 | No |
|     |                          |       |                                                    | GDFIALDLGSSFR         | K | I | 95.00% | 82  |                              | 727.8703  | 2 | 3.2 | 78  | 91  | No |
|     |                          |       |                                                    | GKFNTSDVSAIEK         | R | N | 95.00% | 62  |                              | 698.3614  | 2 | 2.1 | 336 | 348 | No |
|     |                          |       |                                                    | HIDLVEGDEGR           | R | M | 95.00% | 51  |                              | 620.3043  | 2 | 2.9 | 248 | 258 | No |
|     |                          |       |                                                    | IDEALITWTK            | K | R | 95.00% | 48  |                              | 651.8742  | 2 | 7.0 | 167 | 177 | No |
|     |                          |       |                                                    | LALLQVR               | R | A | 95.00% | 45  |                              | 406.7732  | 2 | 3.3 | 799 | 805 | No |
|     |                          |       |                                                    | LNVTVGVDGTLTK         | R | L | 95.00% | 61  |                              | 689.8885  | 2 | 7.9 | 858 | 870 | No |
|     |                          |       |                                                    | LSDETLIDIMTR          | R | F | 95.00% | 88  | M10: Oxidation               | 711.8637  | 2 | 3.0 | 31  | 42  | No |
|     |                          |       |                                                    | LSDETLIDIMTR          | R | F | 95.00% | 45  |                              | 703.8665  | 2 | 3.3 | 31  | 42  | No |
|     |                          |       |                                                    | LVDEYSLNAGK           | R | Q | 95.00% | 72  |                              | 604.8128  | 2 | 1.1 | 728 | 738 | No |
|     |                          |       |                                                    | MISGMYLGEIVR          | K | N | 95.00% | 84  | M1: Oxidation, M5: Oxidation | 700.8550  | 2 | 7.4 | 748 | 759 | No |
|     |                          |       |                                                    | MVSGMYLGELVR          | K | L | 95.00% | 70  | M1: Oxidation, M5: Oxidation | 693.8474  | 2 | 7.9 | 300 | 311 | No |
|     |                          |       |                                                    | NILIDFTK              | R | K | 95.00% | 31  |                              | 963.5584  | 1 | 7.0 | 760 | 767 | No |
|     |                          |       |                                                    | NILIDFTK              | R | K | 95.00% | 39  |                              | 482.2811  | 2 | 2.8 | 756 | 763 | No |
|     |                          |       |                                                    | SANLVAATLGAILNR       | R | L | 95.00% | 91  |                              | 742.4398  | 2 | 8.2 | 386 | 400 | No |
|     |                          |       |                                                    | SANLVAATLGAILNR       | R | L | 95.00% | 90  |                              | 495.2943  | 3 | 5.1 | 386 | 400 | No |
|     |                          |       |                                                    | TPDGTENGDFLALDLGGTNFR | R | V | 95.00% | 127 |                              | 1105.5290 | 2 | 6.4 | 519 | 539 | No |
|     |                          |       |                                                    | TPDGTENGDFLALDLGGTNFR | R | V | 95.00% | 57  |                              | 737.3536  | 3 | 3.8 | 523 | 543 | No |
| 123 | IPI00018342; IPI00640817 | AK1   | ADENYLATE KINASE ISOENZYME 1.; ADENYLATE KINASE 1. | ATEPVIAFYEK           | K | R | 95.00% | 80  |                              | 634.3385  | 2 | 9.1 | 156 | 166 | No |
|     |                          |       |                                                    | ATEPVIAFYEK           | K | G | 95.00% | 43  |                              | 712.3876  | 2 | 6.2 | 156 | 167 | No |
|     |                          |       |                                                    | ATEPVIAFYEK           | K | G | 95.00% | 49  |                              | 475.2605  | 3 | 5.1 | 156 | 167 | No |
|     |                          |       |                                                    | EVQQGEEFER            | R | R | 95.00% | 42  |                              | 1250.5760 | 1 | 8.7 | 98  | 107 | No |
|     |                          |       |                                                    | EVQQGEEFER            | R | R | 95.00% | 38  |                              | 625.7917  | 2 | 8.2 | 98  | 107 | No |
|     |                          |       |                                                    | GETSGRVDNEETIK        | R | K | 95.00% | 59  |                              | 825.3912  | 2 | 7.5 | 133 | 147 | No |
|     |                          |       |                                                    | GETSGRVDNEETIKK       | R | R | 95.00% | 34  |                              | 889.4401  | 2 | 8.6 | 133 | 148 | No |
|     |                          |       |                                                    | GFLIDGYPR             | K | E | 95.00% | 72  |                              | 519.2772  | 2 | 4.2 | 89  | 97  | No |
|     |                          |       |                                                    | GQLVPLETVLDMLR        | K | D | 95.00% | 101 | M12: Oxidation               | 800.4493  | 2 | 7.9 | 64  | 77  | No |
|     |                          |       |                                                    | GQLVPLETVLDMLR        | K | D | 95.00% | 71  | M12: Oxidation               | 533.9672  | 3 | 4.8 | 64  | 77  | No |
|     |                          |       |                                                    | GQLVPLETVLDMLR        | K | D | 95.00% | 96  |                              | 792.4528  | 2 | 9.2 | 64  | 77  | No |
|     |                          |       |                                                    | GQLVPLETVLDMLR        | K | D | 95.00% | 51  |                              | 528.6359  | 3 | 5.5 | 64  | 77  | No |
|     |                          |       |                                                    | IGQPTLLLYVDAGPETMTQR  | R | L | 95.00% | 73  | M17: Oxidation               | 740.3899  | 3 | 7.0 | 109 | 128 | No |
|     |                          |       |                                                    | IGQPTLLLYVDAGPETMTQR  | R | L | 95.00% | 104 |                              | 1102.0860 | 2 | 9.3 | 109 | 128 | No |
|     |                          |       |                                                    | IGQPTLLLYVDAGPETMTQR  | R | L | 95.00% | 68  |                              | 735.0596  | 3 | 8.8 | 109 | 128 | No |
|     |                          |       |                                                    | IIFVVGPGSGK           | K | G | 95.00% | 50  |                              | 1130.6660 | 1 | 7.7 | 10  | 21  | No |
|     |                          |       |                                                    | IIFVVGPGSGK           | K | G | 95.00% | 93  |                              | 565.8331  | 2 | 0.6 | 10  | 21  | No |
|     |                          |       |                                                    | LSEIMEK               | K | G | 95.00% | 32  | M5: Oxidation                | 433.2236  | 2 | 6.1 | 57  | 63  | No |
|     |                          |       |                                                    | RIGQPTLLLYVDAGPETMTQR | R | L | 95.00% | 76  | M18: Oxidation               | 792.4258  | 3 | 9.4 | 108 | 128 | No |
|     |                          |       |                                                    | RLETYYK               | K | A | 95.00% | 41  |                              | 486.7644  | 2 | 5.7 | 149 | 155 | No |
|     |                          |       |                                                    | SEVSSGSAR             | R | G | 95.00% | 36  |                              | 440.2156  | 2 | 7.3 | 45  | 53  | No |
|     |                          |       |                                                    | VDDNEETIK             | R | K | 95.00% | 45  |                              | 531.7561  | 2 | 8.2 | 139 | 147 | No |
|     |                          |       |                                                    | VDDNEETIKK            | R | R | 95.00% | 47  |                              | 595.8050  | 2 | 9.6 | 139 | 148 | No |
|     |                          |       |                                                    | YGYTHLSTGDLR          | K | S | 95.00% | 92  |                              | 748.3867  | 2 | 7.3 | 32  | 44  | No |
|     |                          |       |                                                    | YGYTHLSTGDLR          | K | S | 95.00% | 59  |                              | 499.2585  | 3 | 3.5 | 32  | 44  | No |
| 124 | IPI00018398              | PSMC3 | 26S PROTEASE REGULATORY SUBUNIT 6A.                | AMEVDERPTEQYSDIGGLDK  | K | Q | 95.00% | 48  | M2: Oxidation                | 1135.0300 | 2 | 9.7 | 174 | 193 | No |
|     |                          |       |                                                    | AMEVDERPTEQYSDIGGLDK  | K | Q | 95.00% | 70  | M2: Oxidation                | 757.0187  | 3 | 4.8 | 174 | 193 | No |
|     |                          |       |                                                    | DSYLILELTPTEYDSR      | K | V | 95.00% | 64  |                              | 957.9783  | 2 | 7.8 | 156 | 171 | No |
|     |                          |       |                                                    | EKAPSIIFIDELDAIGTK    | K | R | 95.00% | 63  |                              | 654.0322  | 3 | 8.2 | 277 | 294 | No |
|     |                          |       |                                                    | GATELTHEDYMEGILEVQAK  | R | K | 95.00% | 52  | M11: Oxidation               | 1125.5390 | 2 | 4.9 | 411 | 430 | No |
|     |                          |       |                                                    | GATELTHEDYMEGILEVQAK  | R | K | 95.00% | 64  | M11: Oxidation               | 750.6966  | 3 | 6.3 | 411 | 430 | No |
|     |                          |       |                                                    | GVLMYGPPGTGK          | K | T | 95.00% | 68  | M4: Oxidation                | 596.8076  | 2 | 2.9 | 222 | 233 | No |
|     |                          |       |                                                    | KMNVSPDVNYEELAR       | R | C | 95.00% | 65  | M2: Oxidation                | 890.9378  | 2 | 7.7 | 372 | 386 | No |
|     |                          |       |                                                    | KMNVSPDVNYEELAR       | R | C | 95.00% | 70  | M2: Oxidation                | 594.2919  | 3 | 3.5 | 372 | 386 | No |
|     |                          |       |                                                    | LAGPQLVQMFIDGAK       | K | L | 95.00% | 58  | M9: Oxidation                | 830.9458  | 2 | 6.2 | 251 | 266 | No |
|     |                          |       |                                                    | MSTEEIQR              | K | T | 95.00% | 35  | M1: Oxidation                | 561.7796  | 2 | 4.2 | 36  | 44  | No |
|     |                          |       |                                                    | QIQELVEAIVLPMNHK      | K | E | 95.00% | 48  | M13: Oxidation               | 626.6811  | 3 | 6.2 | 194 | 209 | No |
|     |                          |       |                                                    | QTYFLPVIGLVDAEK       | R | L | 95.00% | 82  |                              | 846.9720  | 2 | 8.7 | 130 | 144 | No |
|     |                          |       |                                                    | TMLELLNQLDGFQPNQVK    | R | V | 95.00% | 124 | M2: Oxidation                | 1103.0760 | 2 | 9.5 | 309 | 327 | No |
|     |                          |       |                                                    | TMLELLNQLDGFQPNQVK    | R | V | 95.00% | 112 | M2: Oxidation                | 735.7193  | 3 | 8.9 | 309 | 327 | No |

|                |                                                                                           |                |                                                                                                                                                                                                                                            |                       |                                       |        |                                                                                       |                         |                                             |           |        |       |               |          |    |     |     |     |    |  |
|----------------|-------------------------------------------------------------------------------------------|----------------|--------------------------------------------------------------------------------------------------------------------------------------------------------------------------------------------------------------------------------------------|-----------------------|---------------------------------------|--------|---------------------------------------------------------------------------------------|-------------------------|---------------------------------------------|-----------|--------|-------|---------------|----------|----|-----|-----|-----|----|--|
| 125            | IPI00018465                                                                               | CCT7           | T-COMPLEX PROTEIN 1 SUBUNIT ETA.                                                                                                                                                                                                           | VDILDPLLRR            | R                                     | S      | 95.00%                                                                                | 39                      |                                             | 562.8411  | 2      | 5.4   | 335           | 344      | No |     |     |     |    |  |
|                |                                                                                           |                |                                                                                                                                                                                                                                            | VIAATNRVDILDPLLRR     | K                                     | S      | 95.00%                                                                                | 50                      |                                             | 617.3708  | 3      | 5.5   | 328           | 344      | No |     |     |     |    |  |
|                |                                                                                           |                |                                                                                                                                                                                                                                            | AIKNDSSVAGGGAIEMELSK  | R                                     | Y      | 95.00%                                                                                | 33                      | M16: Oxidation                              | 669.0182  | 3      | 5.6   | 399           | 418      | No |     |     |     |    |  |
|                |                                                                                           |                |                                                                                                                                                                                                                                            | ATISNDGATILK          | K                                     | L      | 95.00%                                                                                | 53                      |                                             | 602.3354  | 2      | 3.7   | 56            | 67       | No |     |     |     |    |  |
|                |                                                                                           |                |                                                                                                                                                                                                                                            | GGAEQFMEETER          | R                                     | S      | 95.00%                                                                                | 66                      | M7: Oxidation                               | 700.2950  | 2      | 1.5   | 376           | 387      | No |     |     |     |    |  |
|                |                                                                                           |                |                                                                                                                                                                                                                                            | IALLNVELELK           | K                                     | A      | 95.00%                                                                                | 25                      |                                             | 627.8921  | 2      | 7.2   | 237           | 247      | No |     |     |     |    |  |
|                |                                                                                           |                |                                                                                                                                                                                                                                            | LIVDGRGK              | K                                     | A      | 95.00%                                                                                | 37                      |                                             | 429.2602  | 2      | -10.0 | 48            | 55       | No |     |     |     |    |  |
|                |                                                                                           |                |                                                                                                                                                                                                                                            | LPIGDVATQYFADR        | K                                     | D      | 95.00%                                                                                | 79                      |                                             | 783.4083  | 2      | 7.7   | 293           | 306      | No |     |     |     |    |  |
|                |                                                                                           |                |                                                                                                                                                                                                                                            | MVVDVAVMMLDLDLQK      | K                                     | M      | 95.00%                                                                                | 110                     | M1: Oxidation, M7: Oxidation, M8: Oxidation | 941.4817  | 2      | 9.4   | 178           | 193      | No |     |     |     |    |  |
|                |                                                                                           |                |                                                                                                                                                                                                                                            | MVVDVAVMMLDLDLQK      | K                                     | M      | 95.00%                                                                                | 45                      | Oxidation                                   | 627.9886  | 3      | 6.6   | 178           | 193      | No |     |     |     |    |  |
| 126            | IPI00018671; IPI00790757                                                                  | DUSP3          | DUAL SPECIFICITY PROTEIN PHOSPHATASE 3.; 23 KDA PROTEIN.                                                                                                                                                                                   | NDSVVAGGGAIEMELSK     | K                                     | Y      | 95.00%                                                                                | 71                      | M13: Oxidation                              | 846.9149  | 2      | 6.1   | 402           | 418      | No |     |     |     |    |  |
|                |                                                                                           |                |                                                                                                                                                                                                                                            | QQLLIGAYAK            | K                                     | A      | 95.00%                                                                                | 45                      |                                             | 552.8265  | 2      | 3.0   | 431           | 440      | No |     |     |     |    |  |
|                |                                                                                           |                |                                                                                                                                                                                                                                            | QVKPYVEEGLHPQIIIR     | K                                     | A      | 95.00%                                                                                | 39                      |                                             | 673.7206  | 3      | 3.4   | 107           | 123      | No |     |     |     |    |  |
|                |                                                                                           |                |                                                                                                                                                                                                                                            | QVKPYVEEGLHPQIIIR     | K                                     | A      | 95.00%                                                                                | 28                      |                                             | 505.5418  | 4      | 2.2   | 107           | 123      | No |     |     |     |    |  |
|                |                                                                                           |                |                                                                                                                                                                                                                                            | SQDAEVGDGTTSVTLAAEFLK | K                                     | Q      | 95.00%                                                                                | 159                     |                                             | 1126.5800 | 2      | 9.5   | 85            | 106      | No |     |     |     |    |  |
|                |                                                                                           |                |                                                                                                                                                                                                                                            | SQDAEVGDGTTSVTLAAEFLK | K                                     | Q      | 95.00%                                                                                | 69                      |                                             | 751.3879  | 3      | 8.1   | 85            | 106      | No |     |     |     |    |  |
|                |                                                                                           |                |                                                                                                                                                                                                                                            | TFSYAGFEMQPK          | K                                     | K      | 95.00%                                                                                | 64                      | M9: Oxidation                               | 711.3267  | 2      | 3.0   | 219           | 230      | No |     |     |     |    |  |
|                |                                                                                           |                |                                                                                                                                                                                                                                            | VQGGALEDSQLVAGVAFK    | K                                     | K      | 95.00%                                                                                | 97                      |                                             | 894.9836  | 2      | 5.5   | 200           | 217      | No |     |     |     |    |  |
|                |                                                                                           |                |                                                                                                                                                                                                                                            | AADFIDQALAQK          | R                                     | N      | 95.00%                                                                                | 72                      |                                             | 645.8444  | 2      | 8.9   | 105           | 116      | No |     |     |     |    |  |
|                |                                                                                           |                |                                                                                                                                                                                                                                            | 127                   | IPI00018740                           | IDI2   | ISOPENTENYL-DIPHOSPHATE DELTA-ISOMERASE 2.                                            | DSGITYLGIK              | K                                           | A         | 95.00% | 46    |               | 533.7960 | 2  | 5.2 | 80  | 89  | No |  |
| IYVGNASVAQDIPK | R                                                                                         | L              | 95.00%                                                                                                                                                                                                                                     |                       |                                       |        |                                                                                       | 95                      |                                             | 737.9059  | 2      | 8.9   | 37            | 50       | No |     |     |     |    |  |
| LGITHVLNAAEGR  | K                                                                                         | S              | 95.00%                                                                                                                                                                                                                                     |                       |                                       |        |                                                                                       | 46                      |                                             | 675.8835  | 2      | 7.1   | 54            | 66       | No |     |     |     |    |  |
| LGITHVLNAAEGR  | K                                                                                         | S              | 95.00%                                                                                                                                                                                                                                     |                       |                                       |        |                                                                                       | 54                      |                                             | 450.9242  | 3      | 5.5   | 54            | 66       | No |     |     |     |    |  |
| SFMHVNTNANFYK  | R                                                                                         | D              | 95.00%                                                                                                                                                                                                                                     |                       |                                       |        |                                                                                       | 39                      | M3: Oxidation                               | 794.8725  | 2      | 9.8   | 67            | 79       | No |     |     |     |    |  |
| SFMHVNTNANFYK  | R                                                                                         | D              | 95.00%                                                                                                                                                                                                                                     |                       |                                       |        |                                                                                       | 41                      | M3: Oxidation                               | 530.2490  | 3      | 6.2   | 67            | 79       | No |     |     |     |    |  |
| SPTLVIAYLMMR   | R                                                                                         | Q              | 95.00%                                                                                                                                                                                                                                     |                       |                                       |        |                                                                                       | 81                      | M11: Oxidation                              | 713.8823  | 2      | 9.1   | 131           | 142      | No |     |     |     |    |  |
| SPTLVIAYLMMR   | R                                                                                         | Q              | 95.00%                                                                                                                                                                                                                                     |                       |                                       |        |                                                                                       | 61                      | M10: Oxidation, M11: Oxidation              | 476.2560  | 3      | 5.8   | 131           | 142      | No |     |     |     |    |  |
| AFSVVLFNTK     | R                                                                                         | N              | 95.00%                                                                                                                                                                                                                                     |                       |                                       |        |                                                                                       | 64                      |                                             | 563.3247  | 2      | 9.5   | 53            | 62       | No |     |     |     |    |  |
| 128            | IPI00018755; IPI00335132; IPI00419258; IPI00644653; IPI00645948; IPI00742929; IPI00815806 | HMG1L10; HMGB1 | HIGH MOBILITY GROUP PROTEIN 1-LIKE 10.; 22 KDA PROTEIN.; HIGH MOBILITY GROUP PROTEIN B1.; HIGH-MOBILITY GROUP BOX 1.; HIGH-MOBILITY GROUP BOX 1.; SIMILAR TO HIGH MOBILITY GROUP PROTEIN 1.; HIGH-MOBILITY GROUP BOX 1 VARIANT (FRAGMENT). |                       |                                       |        |                                                                                       | KNVTLNPPDSETK           | R                                           | S         | 95.00% | 60    |               | 721.8834 | 2  | 6.8 | 157 | 169 | No |  |
|                |                                                                                           |                |                                                                                                                                                                                                                                            | LEEMLIVVDENDK         | R                                     | V      | 95.00%                                                                                | 86                      | M4: Oxidation                               | 781.8915  | 2      | 8.0   | 17            | 29       | No |     |     |     |    |  |
|                |                                                                                           |                |                                                                                                                                                                                                                                            | IKGEHPGLSIGDVAK       | K                                     | K      | 95.00%                                                                                | 35                      |                                             | 507.6233  | 3      | 6.7   | 113           | 127      | No |     |     |     |    |  |
|                |                                                                                           |                |                                                                                                                                                                                                                                            | LGEMWNNTAADDKQPYEK    | K                                     | K      | 95.00%                                                                                | 45                      | M4: Oxidation                               | 709.3274  | 3      | 7.8   | 129           | 146      | No |     |     |     |    |  |
|                |                                                                                           |                |                                                                                                                                                                                                                                            | 129                   | IPI00018804; IPI00168849              | TRIP10 | ISOFORM 2 OF CDC42-INTERACTING PROTEIN 4.; ISOFORM 1 OF CDC42-INTERACTING PROTEIN 4.  | EGGEGYVPTSYLRR          | K                                           | V         | 95.00% | 41    |               | 714.3481 | 2  | 5.2 | 585 | 597 | No |  |
|                |                                                                                           |                |                                                                                                                                                                                                                                            |                       |                                       |        |                                                                                       | HARPPDPPASAPPDSSNSASQ   |                                             |           |        |       |               |          |    |     |     |     |    |  |
|                |                                                                                           |                |                                                                                                                                                                                                                                            |                       |                                       |        |                                                                                       | DTK                     | R                                           | E         | 95.00% | 58    |               | 839.7281 | 3  | 3.2 | 486 | 510 | No |  |
|                |                                                                                           |                |                                                                                                                                                                                                                                            |                       |                                       |        |                                                                                       | SGRDPLAILSEISK          | R                                           | S         | 95.00% | 31    |               | 495.9495 | 3  | 3.4 | 354 | 367 | No |  |
|                |                                                                                           |                |                                                                                                                                                                                                                                            |                       |                                       |        |                                                                                       | SHMAEESKNEYAAQLQR       | R                                           | F         | 95.00% | 41    | M3: Oxidation | 669.9817 | 3  | 5.0 | 180 | 196 | No |  |
|                |                                                                                           |                |                                                                                                                                                                                                                                            |                       |                                       |        |                                                                                       | TPQMGDPASLEPQIAETLSNIER | K                                           | L         | 95.00% | 62    | M4: Oxidation | 838.4155 | 3  | 4.7 | 434 | 456 | No |  |
| GPMSDDSHGSLVLR | R                                                                                         | L              | 95.00%                                                                                                                                                                                                                                     |                       |                                       |        |                                                                                       | 30                      | M3: Oxidation                               | 744.8284  | 2      | 6.6   | 220           | 233      | No |     |     |     |    |  |
| LSQALGNVTVVQK  | R                                                                                         | G              | 95.00%                                                                                                                                                                                                                                     |                       |                                       |        |                                                                                       | 73                      |                                             | 678.9029  | 2      | 9.4   | 234           | 246      | No |     |     |     |    |  |
| NVQGILEVSK     | R                                                                                         | A              | 95.00%                                                                                                                                                                                                                                     |                       |                                       |        |                                                                                       | 42                      |                                             | 543.8123  | 2      | 0.6   | 163           | 172      | No |     |     |     |    |  |
| 130            | IPI00018942; IPI00645172                                                                  | FLJ10769       | FLJ10769 PROTEIN.; HYPOTHETICAL PROTEIN LOC55739.                                                                                                                                                                                          |                       |                                       |        |                                                                                       | ENMKLPQPEGQTYNN         | K                                           | -         | 95.00% | 32    | M3: Oxidation | 938.4347 | 2  | 3.6 | 130 | 145 | No |  |
|                |                                                                                           |                |                                                                                                                                                                                                                                            | LLEELEEGQK            | R                                     | G      | 95.00%                                                                                | 62                      |                                             | 594.3162  | 2      | 7.1   | 15            | 24       | No |     |     |     |    |  |
|                |                                                                                           |                |                                                                                                                                                                                                                                            | VVLQELR               | K                                     | R      | 95.00%                                                                                | 36                      |                                             | 428.7682  | 2      | 3.5   | 117           | 123      | No |     |     |     |    |  |
|                |                                                                                           |                |                                                                                                                                                                                                                                            | WTGMIIGPPR            | R                                     | T      | 95.00%                                                                                | 47                      | M4: Oxidation                               | 572.3064  | 2      | 5.6   | 46            | 55       | No |     |     |     |    |  |
|                |                                                                                           |                |                                                                                                                                                                                                                                            | YPEAPPSVR             | K                                     | F      | 95.00%                                                                                | 37                      |                                             | 508.2669  | 2      | 4.7   | 73            | 81       | No |     |     |     |    |  |
|                |                                                                                           |                |                                                                                                                                                                                                                                            | 132                   | IPI00019755; IPI00642936; IPI00797661 | GSTO1  | GLUTATHIONE TRANSFERASE OMEGA-1.; GLUTATHIONE S-TRANSFERASE OMEGA 1.; 17 KDA PROTEIN. | EFTKLEEVLTNK            | K                                           | K         | 95.00% | 33    |               | 725.8998 | 2  | 8.4 | 149 | 160 | No |  |

|                         |                          |           |                                                                                                                           |                        |   |          |        |     |                |          |          |      |     |     |     |    |
|-------------------------|--------------------------|-----------|---------------------------------------------------------------------------------------------------------------------------|------------------------|---|----------|--------|-----|----------------|----------|----------|------|-----|-----|-----|----|
| 133                     | IPI00019884              | ACTN2     | ALPHA-ACTININ-2.                                                                                                          | EFTKLEEVLTNKK          | K | T        | 95.00% | 31  |                |          | 526.9676 | 3    | 8.0 | 149 | 161 | No |
|                         |                          |           |                                                                                                                           | MILELFSK               | K | V        | 95.00% | 33  | M1: Oxidation  | 498.7807 | 2        | 9.5  | 115 | 122 | No  |    |
|                         |                          |           |                                                                                                                           | MILELFSK               | K | V        | 95.00% | 38  |                | 490.7812 | 2        | 5.7  | 87  | 94  | No  |    |
|                         |                          |           |                                                                                                                           | VPSLVGSFIR             | K | S        | 95.00% | 56  |                | 537.8225 | 2        | 5.6  | 123 | 132 | No  |    |
|                         |                          |           |                                                                                                                           | AGTQIENIEEDFR          | K | N        | 95.00% | 78  |                | 761.3696 | 2        | 8.3  | 55  | 67  | Yes |    |
|                         |                          |           |                                                                                                                           | ALDYIASK               | K | G        | 95.00% | 32  |                | 440.7440 | 2        | 2.5  | 103 | 110 | No  |    |
|                         |                          |           |                                                                                                                           | ASFNFHFR               | R | R        | 95.00% | 39  |                | 497.2327 | 2        | 3.5  | 760 | 767 | No  |    |
|                         |                          |           |                                                                                                                           | ASTHETWAYGK            | K | E        | 95.00% | 35  |                | 625.7995 | 2        | 8.5  | 410 | 420 | No  |    |
|                         |                          |           |                                                                                                                           | ASTHETWAYGKEQILLQK     | K | D        | 95.00% | 30  |                | 701.7066 | 3        | 7.9  | 410 | 427 | No  |    |
|                         |                          |           |                                                                                                                           | ATLPEADGER             | K | Q        | 95.00% | 46  |                | 529.7622 | 2        | 4.4  | 563 | 572 | No  |    |
|                         |                          |           |                                                                                                                           | ATLPEADGERQSIMAIQNEVEK | K | V        | 95.00% | 42  | M14: Oxidation | 815.7425 | 3        | 7.7  | 563 | 584 | No  |    |
|                         |                          |           |                                                                                                                           | DQSLQEELAR             | R | Q        | 95.00% | 67  |                | 594.7998 | 2        | 4.6  | 622 | 631 | No  |    |
|                         |                          |           |                                                                                                                           | DYESASLTEVR            | K | A        | 95.00% | 74  |                | 635.3043 | 2        | 3.6  | 428 | 438 | No  |    |
|                         |                          |           |                                                                                                                           | ETADTDTAEQVIASFR       | R | I        | 95.00% | 126 |                | 877.4207 | 2        | 5.2  | 821 | 836 | No  |    |
|                         |                          |           |                                                                                                                           | ETADTDTAEQVIASFR       | R | I        | 95.00% | 38  |                | 585.2835 | 3        | 5.9  | 821 | 836 | No  |    |
|                         |                          |           |                                                                                                                           | FAIQDISVEETSAK         | R | E        | 95.00% | 89  |                | 769.3964 | 2        | 6.4  | 141 | 154 | Yes |    |
|                         |                          |           |                                                                                                                           | GITQEQMNEFR            | K | A        | 95.00% | 67  | M7: Oxidation  | 684.8176 | 2        | 3.9  | 749 | 759 | No  |    |
|                         |                          |           |                                                                                                                           | GYEWEILLNEIR           | K | R        | 95.00% | 67  |                | 711.3620 | 2        | 6.8  | 384 | 394 | No  |    |
|                         |                          |           |                                                                                                                           | HRPDLIDYSK             | R | L        | 95.00% | 44  |                | 622.3271 | 2        | 2.2  | 193 | 202 | No  |    |
|                         |                          |           |                                                                                                                           | HRPDLIDYSK             | R | L        | 95.00% | 50  |                | 415.2207 | 3        | 2.3  | 193 | 202 | No  |    |
|                         |                          |           |                                                                                                                           | ILASDKPYIAEELR         | R | R        | 95.00% | 92  |                | 865.9912 | 2        | 3.0  | 837 | 851 | No  |    |
|                         |                          |           |                                                                                                                           | ILASDKPYIAEELR         | R | R        | 95.00% | 60  |                | 577.6648 | 3        | 5.4  | 837 | 851 | No  |    |
|                         |                          |           |                                                                                                                           | ISNRPAFMPSEK           | R | M        | 95.00% | 43  | M8: Oxidation  | 725.3658 | 2        | 5.2  | 354 | 366 | No  |    |
|                         |                          |           |                                                                                                                           | ISNRPAFMPSEK           | R | M        | 95.00% | 36  | M8: Oxidation  | 483.9117 | 3        | 2.4  | 354 | 366 | No  |    |
|                         |                          |           |                                                                                                                           | ISSSNPYSTVTMDEL        | R | T        | 95.00% | 113 | M12: Oxidation | 908.4327 | 2        | 7.9  | 593 | 608 | No  |    |
|                         |                          |           |                                                                                                                           | KAGTQIENIEEDFR         | R | N        | 95.00% | 52  |                | 825.4128 | 2        | 2.5  | 54  | 67  | Yes |    |
|                         |                          |           |                                                                                                                           | KAGTQIENIEEDFRNGLK     | R | L        | 95.00% | 38  |                | 688.0298 | 3        | 8.3  | 54  | 71  | Yes |    |
|                         |                          |           |                                                                                                                           | KHEAFESDLAAHQDR        | R | V        | 95.00% | 58  |                | 585.2830 | 3        | 4.2  | 443 | 457 | Yes |    |
|                         |                          |           |                                                                                                                           | KHEAFESDLAAHQDR        | R | V        | 95.00% | 48  |                | 439.2136 | 4        | 2.9  | 443 | 457 | Yes |    |
|                         |                          |           |                                                                                                                           | LASELLEWIR             | R | R        | 95.00% | 93  |                | 615.3513 | 2        | 4.3  | 289 | 298 | No  |    |
|                         |                          |           |                                                                                                                           | LLETIDQLHLEFAK         | K | R        | 95.00% | 88  |                | 835.4643 | 2        | 2.4  | 510 | 523 | No  |    |
|                         |                          |           |                                                                                                                           | LLETIDQLHLEFAK         | K | R        | 95.00% | 51  |                | 557.3145 | 3        | 6.7  | 510 | 523 | No  |    |
|                         |                          |           |                                                                                                                           | LMEEYER                | R | L        | 95.00% | 30  | M2: Oxidation  | 493.2221 | 2        | 6.4  | 282 | 288 | No  |    |
|                         |                          |           |                                                                                                                           | LMLLLEVISGER           | K | L        | 95.00% | 84  | M2: Oxidation  | 694.9011 | 2        | 8.5  | 72  | 83  | Yes |    |
|                         |                          |           |                                                                                                                           | LNKDDPIGNINLAMEIAEK    | K | H        | 95.00% | 86  | M14: Oxidation | 705.3670 | 3        | 2.3  | 203 | 221 | No  |    |
|                         |                          |           |                                                                                                                           | LVSIGAEIIVDGNVK        | K | M        | 95.00% | 107 |                | 771.9276 | 2        | 6.1  | 114 | 128 | No  |    |
|                         |                          |           |                                                                                                                           | MLDAEDIVNTPKPDER       | K | A        | 95.00% | 70  | M1: Oxidation  | 929.9517 | 2        | 5.1  | 228 | 243 | No  |    |
|                         |                          |           |                                                                                                                           | MLDAEDIVNTPKPDER       | K | A        | 95.00% | 59  | M1: Oxidation  | 620.3021 | 3        | 2.4  | 228 | 243 | No  |    |
|                         |                          |           |                                                                                                                           | MVSDIAGAWQR            | K | L        | 95.00% | 63  | M1: Oxidation  | 625.3060 | 2        | 3.3  | 367 | 377 | No  |    |
|                         |                          |           |                                                                                                                           | NNIDKLEGDHQLIQEALVFDNK | K | H        | 95.00% | 60  |                | 851.7722 | 3        | 2.2  | 690 | 711 | No  |    |
|                         |                          |           |                                                                                                                           | NVNIQNFHTSWK           | R | D        | 95.00% | 39  |                | 744.3690 | 2        | -6.3 | 170 | 181 | No  |    |
|                         |                          |           |                                                                                                                           | QSIMAIQNEVEK           | R | V        | 95.00% | 78  | M4: Oxidation  | 703.3589 | 2        | 7.3  | 573 | 584 | No  |    |
|                         |                          |           |                                                                                                                           | SSIQITGALEDQMNQLK      | R | Q        | 95.00% | 110 | M13: Oxidation | 946.4827 | 2        | 7.3  | 663 | 679 | No  |    |
|                         |                          |           |                                                                                                                           | SSIQITGALEDQMNQLK      | R | Q        | 95.00% | 29  | M13: Oxidation | 631.3221 | 3        | 3.6  | 663 | 679 | No  |    |
|                         |                          |           |                                                                                                                           | SSIQITGALEDQMNQLK      | R | Q        | 95.00% | 85  |                | 938.4833 | 2        | 5.3  | 663 | 679 | No  |    |
| TINEVETQILTR            | R                        | D         | 95.00%                                                                                                                    | 79                     |   | 708.8932 | 2      | 6.0 | 734            | 745      | No       |      |     |     |     |    |
| TINEVETQILTR            | R                        | D         | 95.00%                                                                                                                    | 45                     |   | 472.9306 | 3      | 4.3 | 734            | 745      | No       |      |     |     |     |    |
| VEQIAAIAQELNELDYHDAVNVN |                          |           |                                                                                                                           |                        |   |          |        |     |                |          |          |      |     |     |     |    |
| DR                      | R                        | C         | 95.00%                                                                                                                    | 76                     |   | 947.1430 | 3      | 9.5 | 458            | 482      | No       |      |     |     |     |    |
| VGWELLTTIAR             | R                        | T         | 95.00%                                                                                                                    | 64                     |   | 686.4095 | 2      | 7.9 | 722            | 733      | No       |      |     |     |     |    |
| VIQSYNIR                | K                        | I         | 95.00%                                                                                                                    | 39                     |   | 496.7821 | 2      | 3.4 | 585            | 592      | No       |      |     |     |     |    |
| VLAVNQENER              | K                        | L         | 95.00%                                                                                                                    | 64                     |   | 586.3094 | 2      | 3.2 | 272            | 281      | No       |      |     |     |     |    |
|                         |                          |           | SUCCINATE SEMIALDEHYDE DEHYDROGENASE,<br>MITOCHONDRIAL PRECURSOR.; ALDEHYDE<br>DEHYDROGENASE 5A1 PRECURSOR, ISOFORM<br>1. |                        |   |          |        |     |                |          |          |      |     |     |     |    |
| 134                     | IPI00019888; IPI00336008 | ALDH5A1   |                                                                                                                           | AGGLVPASGPAPGPAQLR     | R | C        | 95.00% | 40  |                |          | 808.4523 | 2    | 2.8 | 28  | 45  | No |
|                         |                          |           |                                                                                                                           | IITAESGKPLK            | R | E        | 95.00% | 41  |                | 578.8546 | 2        | 6.0  | 141 | 151 | No  |    |
|                         |                          |           |                                                                                                                           | LAGLSAALLR             | R | T        | 95.00% | 90  |                | 492.8167 | 2        | 4.9  | 51  | 60  | No  |    |
|                         |                          |           |                                                                                                                           | VGNGFEEGTTQGPLINEK     | R | A        | 95.00% | 91  |                | 945.4742 | 2        | 8.3  | 370 | 387 | No  |    |
|                         |                          |           |                                                                                                                           | YGIDEVLELK             | K | Y        | 95.00% | 83  |                | 621.8217 | 2        | 7.7  | 519 | 528 | No  |    |
| 135                     | IPI00019987              | SUOX      | SULFITE OXIDASE.                                                                                                          | DGETVESGEVTK           | R | G        | 95.00% | 34  |                |          | 682.3398 | 2    | 9.1 | 434 | 446 | No |
|                         |                          |           |                                                                                                                           | VAPTVEITSDPYADDPVR     | K | H        | 95.00% | 67  |                | 916.4473 | 2        | 8.3  | 166 | 182 | No  |    |
|                         |                          |           |                                                                                                                           | VVVPVVVGAR             | R | H        | 95.00% | 21  |                | 476.8032 | 2        | 4.5  | 367 | 376 | No  |    |
| 136                     | IPI00020035              | NIPSNAP3B | PROTEIN NIPSNAP3B.                                                                                                        | AINAHVNLGYTK           | R | V        | 95.00% | 30  |                |          | 434.2411 | 3    | 4.9 | 168 | 179 | No |
|                         |                          |           |                                                                                                                           | IDKQETEITYLIPWSK       | R | L        | 95.00% | 88  |                | 982.5291 | 2        | 6.0  | 121 | 136 | No  |    |
|                         |                          |           |                                                                                                                           | PGGPALWGDAFER          | K | A        | 95.00% | 33  |                | 686.8427 | 2        | 9.1  | 155 | 167 | No  |    |
|                         |                          |           |                                                                                                                           | VHVLWWNESADSR          | R | A        | 95.00% | 34  |                | 533.5988 | 3        | 5.7  | 194 | 206 | No  |    |
|                         |                          |           |                                                                                                                           | VVGVFHTEYGELNR         | K | V        | 95.00% | 53  |                | 810.4203 | 2        | 9.0  | 180 | 193 | No  |    |
|                         |                          |           |                                                                                                                           | VVGVFHTEYGELNR         | K | V        | 95.00% | 41  |                | 540.6151 | 3        | 7.1  | 180 | 193 | No  |    |

|                |                                                    |                |                                                                                              |                        |                          |          |                                             |                    |                |           |        |      |               |          |     |     |     |     |     |
|----------------|----------------------------------------------------|----------------|----------------------------------------------------------------------------------------------|------------------------|--------------------------|----------|---------------------------------------------|--------------------|----------------|-----------|--------|------|---------------|----------|-----|-----|-----|-----|-----|
| 137            | IPI00020210                                        | DYSF           | DYSFERLIN_V1.                                                                                | AEDLPQMDDAVMDNVK       | R                        | Q        | 95.00%                                      | 66                 | M7: Oxidation, | 911.9008  | 2      | 5.4  | 389           | 404      | No  |     |     |     |     |
|                |                                                    |                |                                                                                              | ALGRPGPPFNITPR         | K                        | R        | 95.00%                                      | 43                 | M12: Oxidation | 498.2883  | 3      | 6.8  | 1794          | 1807     | No  |     |     |     |     |
|                |                                                    |                |                                                                                              | DVILDDLSTGEK           | R                        | M        | 95.00%                                      | 79                 |                | 709.3813  | 2      | 8.4  | 1823          | 1835     | No  |     |     |     |     |
|                |                                                    |                |                                                                                              | EFTGFPDPYTELNTGK       | R                        | G        | 95.00%                                      | 33                 |                | 908.4313  | 2      | 5.6  | 532           | 547      | No  |     |     |     |     |
|                |                                                    |                |                                                                                              | EVLATPPLSASFNAPLLDTK   | R                        | K        | 95.00%                                      | 116                |                | 1037.5650 | 2      | 7.2  | 91            | 110      | No  |     |     |     |     |
|                |                                                    |                |                                                                                              | IETQNQLGIADR           | R                        | L        | 95.00%                                      | 43                 |                | 735.9067  | 2      | 9.4  | 673           | 685      | No  |     |     |     |     |
|                |                                                    |                |                                                                                              | IGETVVDLENR            | K                        | L        | 95.00%                                      | 70                 |                | 622.8319  | 2      | 5.8  | 1660          | 1670     | No  |     |     |     |     |
|                |                                                    |                |                                                                                              | ISAPGGEIEEEPAGAVKPSK   | K                        | A        | 95.00%                                      | 53                 |                | 656.0126  | 3      | 4.5  | 486           | 505      | No  |     |     |     |     |
|                |                                                    |                |                                                                                              | LALHVLQQQGLVPEHVESRPLY |                          |          |                                             |                    |                |           |        |      |               |          |     |     |     |     |     |
|                |                                                    |                |                                                                                              | SPLQPDIEQ GK           | R                        | L        | 95.00%                                      | 26                 |                | 930.5105  | 4      | 7.1  | 1751          | 1783     | No  |     |     |     |     |
|                |                                                    |                |                                                                                              | LGHSELPAALEQAEDWLLR    | K                        | L        | 95.00%                                      | 48                 |                | 716.7129  | 3      | 6.5  | 761           | 779      | No  |     |     |     |     |
|                |                                                    |                |                                                                                              | LLLSLETK               | R                        | L        | 95.00%                                      | 39                 |                | 458.7926  | 2      | 5.9  | 557           | 564      | No  |     |     |     |     |
|                |                                                    |                |                                                                                              | LOTIFLK                | K                        | Y        | 95.00%                                      | 22                 |                | 431.7778  | 2      | 8.6  | 832           | 838      | No  |     |     |     |     |
|                |                                                    |                |                                                                                              | NLVDPFVEVSFAGK         | K                        | M        | 95.00%                                      | 43                 |                | 761.4075  | 2      | 7.7  | 415           | 428      | No  |     |     |     |     |
|                |                                                    |                |                                                                                              | TAIEILAWGLR            | R                        | N        | 95.00%                                      | 54                 |                | 621.8696  | 2      | 8.3  | 1333          | 1343     | No  |     |     |     |     |
|                |                                                    |                |                                                                                              | TDALLGEFR              | R                        | M        | 95.00%                                      | 32                 |                | 511.2740  | 2      | 8.1  | 295           | 303      | No  |     |     |     |     |
|                |                                                    |                |                                                                                              | THHLSQITEAALALK        | R                        | L        | 95.00%                                      | 55                 |                | 544.9767  | 3      | 4.3  | 746           | 760      | No  |     |     |     |     |
| VEDLPADDILR    | K                                                  | V              | 95.00%                                                                                       | 35                     |                          | 628.3352 | 2                                           | 7.1                | 573            | 583       | No     |      |               |          |     |     |     |     |     |
| 138            | IPI00020436; IPI00429190; IPI00790785; IPI00795676 | RAB11A; RAB11B | RAS-RELATED PROTEIN RAB-11B.; RAS-RELATED PROTEIN RAB-11A.; 24 KDA PROTEIN.; 22 KDA PROTEIN. | GAVGALLVYDIAK          | R                        | H        | 95.00%                                      | 76                 |                | 645.3825  | 2      | 7.9  | 83            | 95       | No  |     |     |     |     |
|                |                                                    |                |                                                                                              | STIGVEFATR             | K                        | S        | 95.00%                                      | 43                 |                | 540.7930  | 2      | 8.5  | 42            | 51       | No  |     |     |     |     |
| 139            | IPI00020495                                        | MRPS36         | MITOCHONDRIAL 28S RIBOSOMAL PROTEIN S36.                                                     | SAGLPSHSSVISQHSK       | R                        | G        | 95.00%                                      | 37                 |                | 541.2857  | 3      | 7.2  | 42            | 57       | No  |     |     |     |     |
| 140            | IPI00020510                                        | ZCD1           | ZINC FINGER CDGSH DOMAIN-CONTAINING PROTEIN 1.                                               | SPDLLMYQGPPDTAEIHK     | K                        | T        | 95.00%                                      | 57                 | M6: Oxidation  | 1002.5020 | 2      | -2.1 | 61            | 78       | No  |     |     |     |     |
|                |                                                    |                |                                                                                              | AMINLHIQK              | K                        | D        | 95.00%                                      | 43                 | M2: Oxidation  | 542.3077  | 2      | 8.2  | 43            | 51       | No  |     |     |     |     |
| 141            | IPI00020530                                        | THEM2          | THIOESTERASE SUPERFAMILY MEMBER 2.                                                           | HNEETGDNVGPLIK         | K                        | K        | 95.00%                                      | 98                 |                | 818.4281  | 2      | 8.4  | 90            | 104      | No  |     |     |     |     |
|                |                                                    |                |                                                                                              | HNEETGDNVGPLIK         | K                        | K        | 95.00%                                      | 35                 |                | 545.9542  | 3      | 7.5  | 90            | 104      | No  |     |     |     |     |
| 142            | IPI00020906                                        | IMPA1          | INOSITOL MONOPHOSPHATASE.                                                                    | IVHAFDMEDLGDK          | K                        | A        | 95.00%                                      | 64                 | M7: Oxidation  | 753.3584  | 2      | 9.4  | 56            | 68       | No  |     |     |     |     |
|                |                                                    |                |                                                                                              | IVHAFDMEDLGDK          | K                        | A        | 95.00%                                      | 47                 | M7: Oxidation  | 502.5733  | 3      | 6.2  | 56            | 68       | No  |     |     |     |     |
| 143            | IPI00020984                                        | CANX           | CALNEXIN PRECURSOR.                                                                          | ITLVSAAPGK             | K                        | V        | 95.00%                                      | 53                 |                | 478.7970  | 2      | 8.4  | 28            | 37       | No  |     |     |     |     |
|                |                                                    |                |                                                                                              | LGEDIVITAHVLK          | K                        | Q        | 95.00%                                      | 57                 |                | 469.9488  | 3      | 6.8  | 96            | 108      | No  |     |     |     |     |
|                |                                                    |                |                                                                                              | TLAFTSVDLTNK           | K                        | A        | 95.00%                                      | 38                 |                | 655.3577  | 2      | 5.4  | 112           | 123      | No  |     |     |     |     |
|                |                                                    |                |                                                                                              | EIQVIPLQR              | K                        | D        | 95.00%                                      | 23                 |                | 548.3345  | 2      | 7.6  | 265           | 273      | No  |     |     |     |     |
|                |                                                    |                |                                                                                              | EKYPSHSGIEESVAAGEK     | K                        | S        | 95.00%                                      | 56                 |                | 689.0059  | 3      | 6.9  | 60            | 78       | No  |     |     |     |     |
|                |                                                    |                |                                                                                              | LOVSQQEDITK            | K                        | S        | 95.00%                                      | 59                 |                | 644.8462  | 2      | 7.5  | 146           | 156      | No  |     |     |     |     |
|                |                                                    |                |                                                                                              | LLVTELGSSR             | K                        | T        | 95.00%                                      | 56                 |                | 581.3335  | 2      | 9.7  | 157           | 167      | No  |     |     |     |     |
|                |                                                    |                |                                                                                              | SSPVDLVTATDQK          | K                        | V        | 95.00%                                      | 55                 |                | 680.8567  | 2      | 7.0  | 37            | 49       | No  |     |     |     |     |
|                |                                                    |                |                                                                                              | AEDEILNR               | K                        | S        | 95.00%                                      | 30                 |                | 544.7664  | 2      | 2.1  | 574           | 582      | No  |     |     |     |     |
|                |                                                    |                |                                                                                              | APVPTGEVYFADSFDR       | K                        | G        | 95.00%                                      | 106                |                | 885.9280  | 2      | 8.1  | 62            | 77       | No  |     |     |     |     |
|                |                                                    |                |                                                                                              | APVPTGEVYFADSFDR       | K                        | G        | 95.00%                                      | 35                 |                | 590.9553  | 3      | 9.3  | 62            | 77       | No  |     |     |     |     |
|                |                                                    |                |                                                                                              | GTLSGWILSK             | R                        | A        | 95.00%                                      | 54                 |                | 531.3071  | 2      | 6.2  | 78            | 87       | No  |     |     |     |     |
|                |                                                    |                |                                                                                              | KIPNPDFFEDLEPFR        | R                        | M        | 95.00%                                      | 78                 |                | 932.4747  | 2      | 7.0  | 401           | 415      | No  |     |     |     |     |
|                |                                                    |                |                                                                                              | KIPNPDFFEDLEPFR        | R                        | M        | 95.00%                                      | 61                 |                | 621.9855  | 3      | 6.6  | 401           | 415      | No  |     |     |     |     |
|                |                                                    |                |                                                                                              | PVIDNPNYK              | R                        | G        | 95.00%                                      | 37                 |                | 530.2792  | 2      | 2.9  | 372           | 380      | No  |     |     |     |     |
|                |                                                    |                |                                                                                              | SDAEEEDGGTVSQEEDRKP    | K                        | A        | 95.00%                                      | 45                 |                | 736.0015  | 3      | 6.4  | 554           | 573      | No  |     |     |     |     |
|                |                                                    |                |                                                                                              | TPELNLDQFHDK           | K                        | T        | 95.00%                                      | 77                 |                | 728.8632  | 2      | 7.5  | 171           | 182      | No  |     |     |     |     |
| TPELNLDQFHDK   | K                                                  | T              | 95.00%                                                                                       | 45                     |                          | 486.2429 | 3                                           | 3.9                | 171            | 182       | No     |      |               |          |     |     |     |     |     |
| 144            | IPI00020986; IPI00794403; IPI00796888              | LUM            | LUMICAN PRECURSOR.; 23 KDA PROTEIN.; 26 KDA PROTEIN.                                         | FNALQYLR               | R                        | L        | 95.00%                                      | 60                 |                | 512.7856  | 2      | 5.1  | 228           | 235      | No  |     |     |     |     |
|                |                                                    |                |                                                                                              | ISNIPDEYFK             | K                        | R        | 95.00%                                      | 49                 |                | 613.3118  | 2      | 4.3  | 217           | 226      | No  |     |     |     |     |
|                |                                                    |                |                                                                                              | LKEDAVSAAF             | R                        | G        | 95.00%                                      | 31                 |                | 589.8265  | 2      | 2.6  | 171           | 181      | No  |     |     |     |     |
|                |                                                    |                |                                                                                              | LPSGLPVSLTLYLDNKK      | R                        | I        | 95.00%                                      | 130                |                | 979.0618  | 2      | 7.4  | 199           | 216      | No  |     |     |     |     |
|                |                                                    |                |                                                                                              | LPSGLPVSLTLYLDNKK      | R                        | I        | 95.00%                                      | 54                 |                | 653.0441  | 3      | 7.9  | 199           | 216      | No  |     |     |     |     |
|                |                                                    |                |                                                                                              | NIPTVVENLENYYLEVNQLEK  | K                        | F        | 95.00%                                      | 48                 |                | 846.0956  | 3      | 5.7  | 268           | 288      | No  |     |     |     |     |
|                |                                                    |                |                                                                                              | RFNALQYLR              | K                        | L        | 95.00%                                      | 45                 |                | 590.8374  | 2      | 6.6  | 227           | 235      | No  |     |     |     |     |
|                |                                                    |                |                                                                                              | SLEDLQLTHNK            | K                        | I        | 95.00%                                      | 79                 |                | 649.3464  | 2      | 7.4  | 138           | 148      | No  |     |     |     |     |
|                |                                                    |                |                                                                                              | SLEDLQLTHNK            | K                        | I        | 95.00%                                      | 34                 |                | 433.2313  | 3      | 2.4  | 138           | 148      | No  |     |     |     |     |
|                |                                                    |                |                                                                                              | SLEYLDLSFNQIAR         | K                        | L        | 95.00%                                      | 78                 |                | 834.9396  | 2      | 7.0  | 185           | 198      | No  |     |     |     |     |
|                |                                                    |                |                                                                                              | 145                    | IPI00021263; IPI00790768 | YWHAZ    | 14-3-3 PROTEIN ZETA/Delta.; 26 KDA PROTEIN. | DSTLIMQLLR         | K              | D         | 95.00% | 65   | M6: Oxidation | 603.3372 | 2   | 8.2 | 213 | 222 | Yes |
|                |                                                    |                |                                                                                              |                        |                          |          |                                             | GIVDQSQAYQEAIFEISK | K              | K         | 95.00% | 54   |               | 681.0065 | 3   | 7.8 | 140 | 157 | No  |
| NLLSVAYK       | R                                                  | N              | 95.00%                                                                                       |                        |                          |          |                                             | 33                 |                | 907.5325  | 1      | 7.9  | 42            | 49       | Yes |     |     |     |     |
| NLLSVAYK       | R                                                  | N              | 95.00%                                                                                       |                        |                          |          |                                             | 39                 |                | 454.2683  | 2      | 3.9  | 42            | 49       | Yes |     |     |     |     |
| SVTEQGAELSNEER | K                                                  | N              | 95.00%                                                                                       |                        |                          |          |                                             | 112                |                | 774.8660  | 2      | 6.5  | 28            | 41       | No  |     |     |     |     |
| YLAEVAAGDDKK   | R                                                  | G              | 95.00%                                                                                       |                        |                          |          |                                             | 61                 |                | 640.3357  | 2      | 7.9  | 128           | 139      | No  |     |     |     |     |
| YLAEVAAGDDKK   | R                                                  | G              | 95.00%                                                                                       |                        |                          |          |                                             | 39                 |                | 427.2254  | 3      | 5.4  | 128           | 139      | No  |     |     |     |     |

| Accession               | Gene        | Protein | Residue                                                                                                             | Position               | Score                         | Mod       | Score                               | Mod       | Score          | Mod       | Score  | Mod  | Score | Mod      |     |     |   |
|-------------------------|-------------|---------|---------------------------------------------------------------------------------------------------------------------|------------------------|-------------------------------|-----------|-------------------------------------|-----------|----------------|-----------|--------|------|-------|----------|-----|-----|---|
| 146                     | IPI00021338 | DLAT    | DIHYDROLIPOYLLYSINE-RESIDUE ACETYLTRANSFERASE COMPONENT OF PYRUVATE DEHYDROGENASE COMPLEX, MITOCHONDRIAL PRECURSOR. | DIDSFVPSK              | K                             | V         | 95.00%                              | 29        |                | 504.2588  | 2      | 4.8  | 355   | 363      | Yes |     |   |
|                         |             |         |                                                                                                                     | GIDLTVQK               | K                             | G         | 95.00%                              | 31        |                | 437.2582  | 2      | 4.3  | 336   | 343      | Yes |     |   |
|                         |             |         |                                                                                                                     | GVETIANDVVSATK         | K                             | A         | 95.00%                              | 81        |                | 506.2826  | 3      | 6.4  | 500   | 514      | Yes |     |   |
|                         |             |         |                                                                                                                     | ISVNDFIK               | K                             | A         | 95.00%                              | 41        |                | 524.8099  | 2      | 7.2  | 441   | 449      | Yes |     |   |
|                         |             |         |                                                                                                                     | VPEANSSWMDTVIR         | K                             | Q         | 95.00%                              | 66        | M9: Oxidation  | 810.8954  | 2      | 8.6  | 458   | 471      | Yes |     |   |
|                         |             |         |                                                                                                                     | VPLPSLSPMTMQAGTIAR     | K                             | W         | 95.00%                              | 50        | M10: Oxidation | 877.9856  | 2      | 8.9  | 61    | 77       | Yes |     |   |
|                         |             |         |                                                                                                                     | YLEKPITMLL             | K                             | -         | 95.00%                              | 37        | M8: Oxidation  | 618.8555  | 2      | 9.4  | 605   | 614      | Yes |     |   |
|                         |             |         |                                                                                                                     | IEINFPAEYPFKPPK        | R                             | I         | 95.00%                              | 48        |                | 597.3284  | 3      | 9.1  | 53    | 67       | No  |     |   |
|                         |             |         |                                                                                                                     | TDQVIQSLIALVNDPQPEHPLR | K                             | A         | 95.00%                              | 81        |                | 828.4543  | 3      | 8.7  | 101   | 122      | No  |     |   |
|                         |             |         |                                                                                                                     | TDQVIQSLIALVNDPQPEHPLR | K                             | A         | 95.00%                              | 28        |                | 621.5934  | 4      | 9.8  | 101   | 122      | No  |     |   |
|                         |             |         |                                                                                                                     | APSWFDTGLSEMR          | R                             | L         | 95.00%                              | 82        | M12: Oxidation | 756.8485  | 2      | 6.5  | 57    | 69       | No  |     |   |
|                         |             |         |                                                                                                                     | APSWFDTGLSEMR          | R                             | L         | 95.00%                              | 39        | M12: Oxidation | 504.8957  | 3      | -5.2 | 57    | 69       | No  |     |   |
|                         |             |         |                                                                                                                     | APSWFDTGLSEMR          | R                             | L         | 95.00%                              | 92        |                | 748.8503  | 2      | 5.6  | 57    | 69       | No  |     |   |
|                         |             |         |                                                                                                                     | 147                    | IPI00021347                   | UBE2L3    | UBIQUITIN-CONJUGATING ENZYME E2 L3. | DIAIHPWIR | M              | R         | 95.00% | 62   |       | 629.3518 | 2   | 8.0 | 2 |
| DRFSVNLQVK              | K           | H       | 95.00%                                                                                                              |                        |                               |           |                                     | 40        |                | 596.8247  | 2      | 7.5  | 73    | 82       | No  |     |   |
| FSVNLQVK                | R           | H       | 95.00%                                                                                                              |                        |                               |           |                                     | 60        |                | 461.2592  | 2      | 6.5  | 75    | 82       | No  |     |   |
| HEERQDEHGFISR           | K           | E       | 95.00%                                                                                                              |                        |                               |           |                                     | 68        |                | 820.3892  | 2      | 7.8  | 104   | 116      | No  |     |   |
| HEERQDEHGFISR           | K           | E       | 95.00%                                                                                                              |                        |                               |           |                                     | 46        |                | 547.2609  | 3      | 5.6  | 104   | 116      | No  |     |   |
| HFSPEELK                | K           | V       | 95.00%                                                                                                              |                        |                               |           |                                     | 53        |                | 493.7541  | 2      | 5.6  | 83    | 90       | No  |     |   |
| HFSPEELKVK              | K           | V       | 95.00%                                                                                                              |                        |                               |           |                                     | 28        |                | 405.2267  | 3      | 5.1  | 83    | 92       | No  |     |   |
| IPADVPLTITSSSLSSDGLTVNG |             |         |                                                                                                                     |                        |                               |           |                                     |           |                |           |        |      |       |          |     |     |   |
| PR                      | R           | K       | 95.00%                                                                                                              |                        |                               |           |                                     | 73        |                | 875.4700  | 3      | 6.1  | 124   | 149      | No  |     |   |
| QDEHGFISR               | R           | E       | 95.00%                                                                                                              |                        |                               |           |                                     | 38        |                | 544.7646  | 2      | 8.0  | 108   | 116      | No  |     |   |
| RPFPPFHSPSR             | R           | L       | 95.00%                                                                                                              |                        |                               |           |                                     | 56        |                | 687.8613  | 2      | 5.6  | 12    | 22       | No  |     |   |
| RPFPPFHSPSR             | R           | L       | 95.00%                                                                                                              |                        |                               |           |                                     | 51        |                | 458.9096  | 3      | 4.4  | 12    | 22       | No  |     |   |
| VLGDVIEVHGK             | K           | H       | 95.00%                                                                                                              |                        |                               |           |                                     | 83        |                | 583.3348  | 2      | 3.0  | 93    | 103      | No  |     |   |
| VLGDVIEVHGKHEER         | K           | Q       | 95.00%                                                                                                              |                        |                               |           |                                     | 52        |                | 858.9621  | 2      | 7.5  | 93    | 107      | No  |     |   |
| 148                     | IPI00021369 | CRYAB   | ALPHA CRYSTALLIN B CHAIN.                                                                                           | IRIDSLAQLSQLQK         | R                             | Q         | 95.00%                              | 60        |                | 715.9004  | 2      | 5.1  | 299   | 311      | No  |     |   |
|                         |             |         |                                                                                                                     | IRIDSLAQLSQLQK         | R                             | Q         | 95.00%                              | 46        |                | 850.4954  | 2      | 7.1  | 297   | 311      | No  |     |   |
|                         |             |         |                                                                                                                     | IRIDSLAQLSQLQK         | R                             | Q         | 95.00%                              | 41        |                | 567.3304  | 3      | 2.7  | 297   | 311      | No  |     |   |
|                         |             |         |                                                                                                                     | ITESEEVVSR             | R                             | E         | 95.00%                              | 42        |                | 574.7988  | 2      | 8.6  | 63    | 72       | No  |     |   |
|                         |             |         |                                                                                                                     | LADALQELR              | R                             | A         | 95.00%                              | 71        |                | 514.7931  | 2      | 4.2  | 241   | 249      | No  |     |   |
|                         |             |         |                                                                                                                     | LKDLEALLNSK            | R                             | E         | 95.00%                              | 32        |                | 415.2487  | 3      | 3.1  | 134   | 144      | No  |     |   |
|                         |             |         |                                                                                                                     | MQQQLDEYQELLDIK        | R                             | L         | 95.00%                              | 113       | M1: Oxidation  | 955.4732  | 2      | 8.6  | 352   | 366      | No  |     |   |
|                         |             |         |                                                                                                                     | MQQQLDEYQELLDIK        | R                             | L         | 95.00%                              | 34        | M1: Oxidation  | 637.3156  | 3      | 4.7  | 352   | 366      | No  |     |   |
|                         |             |         |                                                                                                                     | NSNLVGAHHEELQQSR       | R                             | I         | 95.00%                              | 84        |                | 876.9406  | 2      | 6.0  | 281   | 296      | No  |     |   |
|                         |             |         |                                                                                                                     | NSNLVGAHHEELQQSR       | R                             | I         | 95.00%                              | 46        |                | 584.9615  | 3      | 3.4  | 281   | 296      | No  |     |   |
|                         |             |         |                                                                                                                     | SGAQAASSTPLSPTR        | R                             | I         | 95.00%                              | 62        |                | 680.3489  | 2      | 2.3  | 12    | 25       | No  |     |   |
|                         |             |         |                                                                                                                     | SVGGSGGGSFGDNLVTR      | R                             | S         | 95.00%                              | 107       |                | 783.8821  | 2      | 3.2  | 628   | 644      | No  |     |   |
|                         |             |         |                                                                                                                     | TALINSTGEEVAMR         | R                             | K         | 95.00%                              | 39        | M13: Oxidation | 754.3778  | 2      | 3.4  | 528   | 541      | No  |     |   |
|                         |             |         |                                                                                                                     | TLEGELHDLR             | R                             | G         | 95.00%                              | 62        |                | 591.8122  | 2      | 3.7  | 157   | 166      | No  |     |   |
| 150                     | IPI00021428 | ACTA1   | ACTIN, ALPHA SKELETAL MUSCLE.                                                                                       | AGFAGDDAPR             | K                             | A         | 95.00%                              | 57        |                | 976.4520  | 1      | 3.2  | 21    | 30       | Yes |     |   |
|                         |             |         |                                                                                                                     | AGFAGDDAPR             | K                             | A         | 95.00%                              | 90        |                | 488.7286  | 2      | 0.4  | 21    | 30       | Yes |     |   |
|                         |             |         |                                                                                                                     | AVFPSIVGR              | R                             | P         | 95.00%                              | 78        |                | 473.2801  | 2      | 0.1  | 31    | 39       | Yes |     |   |
|                         |             |         |                                                                                                                     | AVFPSIVGRPR            | R                             | H         | 95.00%                              | 77        |                | 599.8580  | 2      | 1.6  | 31    | 41       | Yes |     |   |
|                         |             |         |                                                                                                                     | AVFPSIVGRPR            | R                             | H         | 95.00%                              | 29        |                | 400.2415  | 3      | 2.1  | 31    | 41       | Yes |     |   |
|                         |             |         |                                                                                                                     | DLTDYLMK               | R                             | I         | 95.00%                              | 45        | M7: Oxidation  | 1014.4920 | 1      | 9.3  | 186   | 193      | Yes |     |   |
|                         |             |         |                                                                                                                     | DLTDYLMK               | R                             | I         | 95.00%                              | 56        | M7: Oxidation  | 507.7452  | 2      | 0.5  | 186   | 193      | Yes |     |   |
|                         |             |         |                                                                                                                     | DLTDYLMK               | R                             | I         | 95.00%                              | 44        |                | 499.7504  | 2      | 5.9  | 186   | 193      | Yes |     |   |
|                         |             |         |                                                                                                                     | DLYANNVMSGGTTMPGIADR   | K                             | M         | 95.00%                              | 139       | M14: Oxidation | 1131.5230 | 2      | 9.0  | 294   | 314      | No  |     |   |
|                         |             |         |                                                                                                                     | DLYANNVMSGGTTMPGIADR   | K                             | M         | 95.00%                              | 83        | M14: Oxidation | 754.6836  | 3      | 7.9  | 294   | 314      | No  |     |   |
|                         |             |         |                                                                                                                     | DLYANNVMSGGTTMPGIADR   | K                             | M         | 95.00%                              | 111       | M8: Oxidation  | 1131.5230 | 2      | 9.2  | 294   | 314      | No  |     |   |
|                         |             |         |                                                                                                                     | DLYANNVMSGGTTMPGIADR   | K                             | M         | 95.00%                              | 58        | M8: Oxidation  | 754.6824  | 3      | 6.4  | 294   | 314      | No  |     |   |
|                         |             |         |                                                                                                                     | DLYANNVMSGGTTMPGIADR   | K                             | M         | 95.00%                              | 130       | M8: Oxidation  | 1139.5170 | 2      | 6.2  | 294   | 314      | No  |     |   |
|                         |             |         |                                                                                                                     | DLYANNVMSGGTTMPGIADR   | K                             | M         | 95.00%                              | 88        | M8: Oxidation  | 760.0115  | 3      | 3.0  | 294   | 314      | No  |     |   |
| DLYANNVMSGGTTMPGIADR    | K           | M       | 95.00%                                                                                                              | 130                    | M8: Oxidation, M14: Oxidation | 1139.5170 | 2                                   | 6.2       | 294            | 314       | No     |      |       |          |     |     |   |
| DLYANNVMSGGTTMPGIADR    | K           | M       | 95.00%                                                                                                              | 88                     | M14: Oxidation                | 760.0115  | 3                                   | 3.0       | 294            | 314       | No     |      |       |          |     |     |   |
| DSYVGDEAQSQR            | K           | R       | 95.00%                                                                                                              | 85                     |                               | 599.7709  | 2                                   | 9.3       | 53             | 63        | Yes    |      |       |          |     |     |   |
| DSYVGDEAQSQR            | K           | G       | 95.00%                                                                                                              | 65                     |                               | 677.8182  | 2                                   | 3.5       | 53             | 64        | Yes    |      |       |          |     |     |   |
| DSYVGDEAQSQR            | K           | G       | 95.00%                                                                                                              | 36                     |                               | 452.2152  | 3                                   | 4.6       | 53             | 64        | Yes    |      |       |          |     |     |   |

|                         |   |   |        |     |                                              |           |   |      |     |     |     |
|-------------------------|---|---|--------|-----|----------------------------------------------|-----------|---|------|-----|-----|-----|
| EITALAPSTMK             | K | I | 95.00% | 71  | M10: Oxidation                               | 1177.6180 | 1 | 3.4  | 318 | 328 | Yes |
| EITALAPSTMK             | K | I | 95.00% | 91  | M10: Oxidation                               | 589.3099  | 2 | -1.7 | 318 | 328 | Yes |
| EITALAPSTMK             | K | I | 95.00% | 58  |                                              | 1161.6240 | 1 | 4.3  | 318 | 328 | Yes |
| EITALAPSTMK             | K | I | 95.00% | 76  |                                              | 581.3145  | 2 | 1.8  | 318 | 328 | Yes |
| EITALAPSTMKIK           | K | I | 95.00% | 36  | M10: Oxidation                               | 709.9036  | 2 | 4.5  | 318 | 330 | Yes |
| GILTLK                  | R | Y | 95.00% | 37  |                                              | 644.4368  | 1 | 3.0  | 65  | 70  | Yes |
| GYSFVTTAER              | R | E | 95.00% | 43  |                                              | 1130.5600 | 1 | 9.9  | 199 | 208 | Yes |
| GYSFVTTAER              | R | E | 95.00% | 80  |                                              | 565.7778  | 2 | -0.4 | 199 | 208 | Yes |
| GYSFVTTAEREIVR          | R | D | 95.00% | 31  |                                              | 543.2880  | 3 | 2.4  | 199 | 212 | No  |
| HQGVVMVGMGQK            | R | D | 95.00% | 63  | M5: Oxidation                                | 594.2880  | 2 | 1.2  | 42  | 52  | Yes |
| HQGVVMVGMGQK            | R | D | 95.00% | 62  | M5: Oxidation                                | 602.2896  | 2 | 8.2  | 42  | 52  | Yes |
| HQGVVMVGMGQK            | R | D | 95.00% | 62  | M5: Oxidation                                | 401.8615  | 3 | 6.2  | 42  | 52  | Yes |
| HQGVVMVGMGQK            | R | D | 95.00% | 62  | M5: Oxidation, M8: Oxidation                 | 602.2896  | 2 | 8.2  | 42  | 52  | Yes |
| HQGVVMVGMGQK            | R | D | 95.00% | 62  | M5: Oxidation, M8: Oxidation                 | 401.8615  | 3 | 6.2  | 42  | 52  | Yes |
| HQGVVMVGMGQK            | R | D | 95.00% | 61  | M8: Oxidation                                | 594.2899  | 2 | 4.4  | 42  | 52  | Yes |
| HQGVVMVGMGQK            | R | D | 95.00% | 71  |                                              | 1171.5740 | 1 | 2.1  | 42  | 52  | Yes |
| HQGVVMVGMGQK            | R | D | 95.00% | 85  |                                              | 586.2923  | 2 | 4.3  | 42  | 52  | Yes |
| IIAPPERK                | K | Y | 95.00% | 36  |                                              | 462.2889  | 2 | 2.3  | 331 | 338 | Yes |
| IKIIAPPER               | K | K | 95.00% | 32  |                                              | 518.8319  | 2 | 3.8  | 329 | 337 | Yes |
| IKIIAPPERK              | K | Y | 95.00% | 26  |                                              | 582.8785  | 2 | 1.9  | 329 | 338 | Yes |
| IWHHTFYNELR             | K | V | 95.00% | 70  |                                              | 758.3789  | 2 | 0.2  | 87  | 97  | Yes |
| IWHHTFYNELR             | K | V | 95.00% | 66  |                                              | 505.9227  | 3 | 1.9  | 87  | 97  | Yes |
| KDLYANNVMSGGTTMYPGIADR  | R | M | 95.00% | 89  | M15: Oxidation                               | 1195.5650 | 2 | 4.5  | 293 | 314 | No  |
| KDLYANNVMSGGTTMYPGIADR  | R | M | 95.00% | 73  | M15: Oxidation                               | 797.3807  | 3 | 5.9  | 293 | 314 | No  |
| KDLYANNVMSGGTTMYPGIADR  | R | M | 95.00% | 80  | M9: Oxidation                                | 797.3804  | 3 | 5.6  | 293 | 314 | No  |
| KDLYANNVMSGGTTMYPGIADR  | R | M | 95.00% | 99  | M9: Oxidation                                | 1203.5660 | 2 | 7.1  | 293 | 314 | No  |
| KDLYANNVMSGGTTMYPGIADR  | R | M | 95.00% | 101 | M9: Oxidation                                | 802.7129  | 3 | 6.7  | 293 | 314 | No  |
| KDLYANNVMSGGTTMYPGIADR  | R | M | 95.00% | 99  | M15: Oxidation, M9: Oxidation                | 1203.5660 | 2 | 7.1  | 293 | 314 | No  |
| KDLYANNVMSGGTTMYPGIADR  | R | M | 95.00% | 101 | M15: Oxidation, M9: Oxidation                | 802.7129  | 3 | 6.7  | 293 | 314 | No  |
| KDLYANNVMSGGTTMYPGIADR  | R | M | 95.00% | 57  |                                              | 792.0503  | 3 | 7.5  | 293 | 314 | No  |
| KYSVWIGGSILASLSTFQQMWIT | K | Q | 95.00% | 52  | M20: Oxidation                               | 920.8272  | 3 | 8.1  | 338 | 361 | No  |
| KYSVWIGGSILASLSTFQQMWIT | R | Q | 95.00% | 34  |                                              | 915.4942  | 3 | 6.8  | 338 | 361 | No  |
| LDLAGRDLTDYLMK          | R | I | 95.00% | 34  | M13: Oxidation                               | 547.2877  | 3 | 6.4  | 180 | 193 | Yes |
| MQKEITALAPSTMK          | R | I | 95.00% | 62  | M1: Oxidation, M13: Oxidation                | 790.9117  | 2 | 8.0  | 315 | 328 | Yes |
| MTQIMFETFNVPAMYVAIQAVLS | K | T | 95.00% | 64  | M1: Oxidation                                | 1089.8870 | 3 | 6.0  | 121 | 149 | Yes |
| LYASGR                  | K | T | 95.00% | 87  | M1: Oxidation                                | 1095.2200 | 3 | 7.4  | 121 | 149 | Yes |
| MTQIMFETFNVPAMYVAIQAVLS | K | T | 95.00% | 38  | M1: Oxidation                                | 821.6656  | 4 | 5.9  | 121 | 149 | Yes |
| LYASGR                  | K | T | 95.00% | 63  | M1: Oxidation                                | 1100.5530 | 3 | 8.7  | 121 | 149 | Yes |
| MTQIMFETFNVPAMYVAIQAVLS | K | T | 95.00% | 87  | M1: Oxidation, M5: Oxidation                 | 1095.2200 | 3 | 7.4  | 121 | 149 | Yes |
| LYASGR                  | K | T | 95.00% | 38  | M1: Oxidation, M5: Oxidation                 | 821.6656  | 4 | 5.9  | 121 | 149 | Yes |
| MTQIMFETFNVPAMYVAIQAVLS | K | T | 95.00% | 63  | M1: Oxidation, M5: Oxidation                 | 1100.5530 | 3 | 8.7  | 121 | 149 | Yes |
| LYASGR                  | K | T | 95.00% | 63  | M1: Oxidation, M5: Oxidation, M14: Oxidation | 1100.5530 | 3 | 8.7  | 121 | 149 | Yes |
| MTQIMFETFNVPAMYVAIQAVLS | K | T | 95.00% | 91  | M5: Oxidation                                | 1089.8870 | 3 | 6.1  | 121 | 149 | Yes |
| QEYDEAGPSIVHR           | K | K | 95.00% | 88  |                                              | 750.8618  | 2 | 5.0  | 362 | 374 | Yes |
| QEYDEAGPSIVHR           | K | K | 95.00% | 63  |                                              | 500.9097  | 3 | 3.4  | 362 | 374 | Yes |
| QEYDEAGPSIVHRK          | K | C | 95.00% | 64  |                                              | 814.9073  | 2 | 2.1  | 362 | 375 | Yes |
| QEYDEAGPSIVHRK          | K | C | 95.00% | 39  |                                              | 543.6076  | 3 | 2.3  | 362 | 375 | Yes |

|     |                          |         |                                                                                   |                                                                                   |   |   |        |     |                |           |   |     |      |      |     |
|-----|--------------------------|---------|-----------------------------------------------------------------------------------|-----------------------------------------------------------------------------------|---|---|--------|-----|----------------|-----------|---|-----|------|------|-----|
|     |                          |         |                                                                                   | RGILTLK                                                                           | K | Y | 95.00% | 40  |                | 400.7732  | 2 | 3.4 | 64   | 70   | Yes |
|     |                          |         |                                                                                   | SYELPDGQVITIGNER                                                                  | K | F | 95.00% | 132 |                | 895.9526  | 2 | 2.7 | 241  | 256  | Yes |
|     |                          |         |                                                                                   | SYELPDGQVITIGNER                                                                  | K | F | 95.00% | 73  |                | 597.6398  | 3 | 6.2 | 241  | 256  | Yes |
|     |                          |         |                                                                                   | TTGIVLDSGDGVTHNVPIYEGYA                                                           |   |   |        |     |                |           |   |     |      |      |     |
|     |                          |         |                                                                                   | LPHAIMR                                                                           | R | L | 95.00% | 79  | M29: Oxidation | 1071.5480 | 3 | 6.9 | 150  | 179  | Yes |
|     |                          |         |                                                                                   | TTGIVLDSGDGVTHNVPIYEGYA                                                           |   |   |        |     |                |           |   |     |      |      |     |
|     |                          |         |                                                                                   | LPHAIMR                                                                           | R | L | 95.00% | 56  | M29: Oxidation | 643.3307  | 5 | 5.5 | 150  | 179  | Yes |
|     |                          |         |                                                                                   | TTGIVLDSGDGVTHNVPIYEGYA                                                           |   |   |        |     |                |           |   |     |      |      |     |
|     |                          |         |                                                                                   | LPHAIMR                                                                           | R | L | 95.00% | 72  |                | 1066.2180 | 3 | 9.2 | 150  | 179  | Yes |
|     |                          |         |                                                                                   | TTGIVLDSGDGVTHNVPIYEGYA                                                           |   |   |        |     |                |           |   |     |      |      |     |
|     |                          |         |                                                                                   | LPHAIMR                                                                           | R | L | 95.00% | 39  |                | 799.9139  | 4 | 7.0 | 150  | 179  | Yes |
|     |                          |         |                                                                                   | VAPEEHPDLLTEAPLNPK                                                                | R | A | 95.00% | 102 |                | 978.5344  | 2 | 8.3 | 98   | 115  | Yes |
|     |                          |         |                                                                                   | VAPEEHPDLLTEAPLNPK                                                                | R | A | 95.00% | 64  |                | 652.6884  | 3 | 2.6 | 98   | 115  | Yes |
|     |                          |         |                                                                                   | VAPEEHPDLLTEAPLNPKANR                                                             | R | E | 95.00% | 33  |                | 766.4174  | 3 | 4.8 | 98   | 118  | No  |
|     |                          |         |                                                                                   | YPIEHGIITNWDDMEK                                                                  | K | I | 95.00% | 42  | M14: Oxidation | 988.9642  | 2 | 7.1 | 71   | 86   | Yes |
|     |                          |         |                                                                                   | YSVWIGGSILASLSTFQQMWITK                                                           | K | Q | 95.00% | 118 | M19: Oxidation | 1316.6880 | 2 | 7.4 | 339  | 361  | No  |
|     |                          |         |                                                                                   | YSVWIGGSILASLSTFQQMWITK                                                           | K | Q | 95.00% | 75  | M19: Oxidation | 878.1273  | 3 | 6.9 | 339  | 361  | No  |
|     |                          |         |                                                                                   | YSVWIGGSILASLSTFQQMWITK                                                           | K | Q | 95.00% | 78  |                | 872.7983  | 3 | 9.9 | 339  | 361  | No  |
| 151 | IPI00021435              | PSMC2   | 26S PROTEASE REGULATORY SUBUNIT 7.                                                | ALDEGDIALK                                                                        | R | T | 95.00% | 83  |                | 579.3276  | 2 | 4.6 | 24   | 34   | No  |
|     |                          |         |                                                                                   | FDDGAGGDNEVQR                                                                     | R | T | 95.00% | 59  |                | 690.3010  | 2 | 8.1 | 285  | 297  | No  |
|     |                          |         |                                                                                   | FVNLGIEPPK                                                                        | R | G | 95.00% | 49  |                | 557.3231  | 2 | 6.5 | 201  | 210  | No  |
|     |                          |         |                                                                                   | GVLLFGPPGTGK                                                                      | K | T | 95.00% | 28  |                | 571.8361  | 2 | 5.9 | 211  | 222  | No  |
|     |                          |         |                                                                                   | IATEKDFLEAVNK                                                                     | K | V | 95.00% | 64  |                | 739.4018  | 2 | 3.7 | 403  | 415  | No  |
|     |                          |         |                                                                                   | QTLQSEQPLQVAR                                                                     | K | C | 95.00% | 70  |                | 749.4098  | 2 | 6.2 | 85   | 97   | No  |
| 152 | IPI00021785              | COX5B   | CYTOCHROME C OXIDASE SUBUNIT 5B, MITOCHONDRIAL PRECURSOR.                         | GLDPYINVLPK                                                                       | K | G | 95.00% | 47  |                | 593.8314  | 2 | 6.4 | 58   | 68   | No  |
|     |                          |         |                                                                                   | KGLDPYINVLPK                                                                      | K | G | 95.00% | 53  |                | 657.8810  | 2 | 8.9 | 57   | 68   | No  |
|     |                          |         |                                                                                   | KGLDPYINVLPK                                                                      | K | G | 95.00% | 48  |                | 438.9227  | 3 | 7.6 | 57   | 68   | No  |
|     |                          |         |                                                                                   | NEUROBLAST DIFFERENTIATION-ASSOCIATED PROTEIN AHNAK (FRAGMENT).; 313 KDA PROTEIN. |   |   |        |     |                |           |   |     |      |      |     |
| 153 | IPI00021812; IPI00555610 | AHNAK   | NEUROBLAST DIFFERENTIATION-ASSOCIATED PROTEIN AHNAK (FRAGMENT).; 313 KDA PROTEIN. | GEGPDVDVNLPK                                                                      | K | A | 95.00% | 40  |                | 620.3199  | 2 | 7.8 | 1737 | 1748 | No  |
|     |                          |         |                                                                                   | GEGPEVDVNLPK                                                                      | K | A | 95.00% | 30  |                | 627.3245  | 2 | 2.5 | 894  | 905  | No  |
|     |                          |         |                                                                                   | VDVEVPDVSLEGPEGK                                                                  | K | L | 95.00% | 38  |                | 834.9283  | 2 | 9.1 | 1043 | 1058 | No  |
| 154 | IPI00021831              | PRKAR1A | CAMP-DEPENDENT PROTEIN KINASE TYPE I-ALPHA REGULATORY SUBUNIT.                    | GAISAEVYTEEDAASYVR                                                                | R | K | 95.00% | 109 |                | 965.9646  | 2 | 9.3 | 98   | 115  | No  |
|     |                          |         |                                                                                   | HNIQALLK                                                                          | K | D | 95.00% | 36  |                | 468.7861  | 2 | 1.2 | 25   | 32   | No  |
|     |                          |         |                                                                                   | ILMGSTLR                                                                          | R | K | 95.00% | 32  | M3: Oxidation  | 453.7595  | 2 | 3.2 | 234  | 241  | No  |
|     |                          |         |                                                                                   | LGPSDYFGEIALLMNRPR                                                                | R | A | 95.00% | 33  | M14: Oxidation | 689.0267  | 3 | 5.0 | 318  | 335  | No  |
|     |                          |         |                                                                                   | LTVADALEPVQFEDGQK                                                                 | R | I | 95.00% | 118 |                | 930.4805  | 2 | 7.4 | 265  | 281  | No  |
|     |                          |         |                                                                                   | LTVADALEPVQFEDGQK                                                                 | R | I | 95.00% | 68  |                | 620.6557  | 3 | 6.5 | 265  | 281  | No  |
|     |                          |         |                                                                                   | NIQQYNSFVLSV                                                                      | R | - | 95.00% | 60  |                | 749.8871  | 2 | 8.3 | 369  | 381  | No  |
|     |                          |         |                                                                                   | NVLFSLDDNER                                                                       | K | S | 95.00% | 95  |                | 729.8559  | 2 | 4.3 | 135  | 146  | No  |
|     |                          |         |                                                                                   | NVLFSLDDNER                                                                       | K | S | 95.00% | 36  |                | 486.9060  | 3 | 3.2 | 135  | 146  | No  |
|     |                          |         |                                                                                   | RSENEEFVEVGR                                                                      | R | L | 95.00% | 76  |                | 725.8531  | 2 | 4.0 | 306  | 317  | No  |
|     |                          |         |                                                                                   | RSENEEFVEVGR                                                                      | R | L | 95.00% | 63  |                | 484.2379  | 3 | 3.9 | 306  | 317  | No  |
|     |                          |         |                                                                                   | RSENEEFVEVGR                                                                      | R | L | 95.00% | 81  |                | 647.8026  | 2 | 4.4 | 307  | 317  | No  |
|     |                          |         |                                                                                   | TDSREDEISPPPPNPVVK                                                                | R | G | 95.00% | 36  | S9: Phospho    | 686.3270  | 3 | 2.8 | 75   | 92   | No  |
|     |                          |         |                                                                                   | TDSREDEISPPPPNPVVK                                                                | R | G | 95.00% | 53  |                | 989.0057  | 2 | 5.2 | 75   | 92   | No  |
|     |                          |         |                                                                                   | VSILESLDK                                                                         | K | W | 95.00% | 42  |                | 502.2894  | 2 | 3.2 | 253  | 261  | No  |
|     |                          |         |                                                                                   | VSILESLDKWER                                                                      | K | L | 95.00% | 56  |                | 737.9034  | 2 | 5.5 | 253  | 264  | No  |
|     |                          |         |                                                                                   | VSILESLDKWER                                                                      | K | L | 95.00% | 56  |                | 492.2717  | 3 | 6.0 | 253  | 264  | No  |
| 155 | IPI00021841              | APOA1   | APOLIPOPROTEIN A-I PRECURSOR.                                                     | AKPAEDLR                                                                          | K | Q | 95.00% | 37  |                | 506.7962  | 2 | 5.2 | 231  | 239  | No  |
|     |                          |         |                                                                                   | ATEHLSTLSEK                                                                       | K | A | 95.00% | 60  |                | 608.3187  | 2 | 6.1 | 220  | 230  | No  |
|     |                          |         |                                                                                   | DLATVYVDVVK                                                                       | K | D | 95.00% | 87  |                | 618.3542  | 2 | 9.6 | 37   | 47   | No  |
|     |                          |         |                                                                                   | DSGRDYYSQFEGSALGK                                                                 | K | Q | 95.00% | 62  |                | 908.4341  | 2 | 4.9 | 48   | 64   | No  |
|     |                          |         |                                                                                   | DSGRDYYSQFEGSALGK                                                                 | K | Q | 95.00% | 45  |                | 605.9594  | 3 | 6.1 | 48   | 64   | No  |
|     |                          |         |                                                                                   | DYVSQFEGSALGK                                                                     | R | Q | 95.00% | 70  |                | 700.8445  | 2 | 8.2 | 52   | 64   | No  |
|     |                          |         |                                                                                   | EQLGPVTQEFWDNLEK                                                                  | R | E | 95.00% | 93  |                | 966.9803  | 2 | 9.4 | 86   | 101  | No  |
|     |                          |         |                                                                                   | LLDNWDSVTSTFSK                                                                    | K | L | 95.00% | 103 |                | 806.9048  | 2 | 9.8 | 70   | 83   | No  |
|     |                          |         |                                                                                   | LRELQGPVTQEFWDNLEK                                                                | K | E | 95.00% | 54  |                | 734.7180  | 3 | 8.4 | 84   | 101  | No  |
|     |                          |         |                                                                                   | LSPIDGEEMR                                                                        | K | D | 95.00% | 35  | M8: Oxidation  | 524.2638  | 2 | 5.1 | 165  | 173  | No  |
|     |                          |         |                                                                                   | QGLLPVLESFK                                                                       | R | V | 95.00% | 50  |                | 615.8642  | 2 | 8.6 | 240  | 250  | No  |
|     |                          |         |                                                                                   | QKVEPLRAELQEGAR                                                                   | R | Q | 95.00% | 31  |                | 862.4835  | 2 | 7.9 | 141  | 155  | No  |
|     |                          |         |                                                                                   | THLAPYSDELK                                                                       | R | Q | 95.00% | 35  |                | 651.3331  | 2 | 7.2 | 185  | 195  | No  |
|     |                          |         |                                                                                   | THLAPYSDELK                                                                       | R | Q | 95.00% | 33  |                | 434.5575  | 3 | 6.1 | 185  | 195  | No  |
|     |                          |         |                                                                                   | VEPLRAELQEGAR                                                                     | K | Q | 95.00% | 28  |                | 734.4052  | 2 | 7.2 | 143  | 155  | No  |
|     |                          |         |                                                                                   | VKDLATVYVDVVK                                                                     | R | D | 95.00% | 76  |                | 731.9343  | 2 | 5.8 | 35   | 47   | No  |

|     |                                                                              |         |                                                                                                                                                                                                                                                                                                   |                        |   |   |        |     |          |   |     |      |      |    |
|-----|------------------------------------------------------------------------------|---------|---------------------------------------------------------------------------------------------------------------------------------------------------------------------------------------------------------------------------------------------------------------------------------------------------|------------------------|---|---|--------|-----|----------|---|-----|------|------|----|
|     |                                                                              |         |                                                                                                                                                                                                                                                                                                   | VKDLATVYVDVLK          | R | D | 95.00% | 41  | 488.2926 | 3 | 6.8 | 35   | 47   | No |
|     |                                                                              |         |                                                                                                                                                                                                                                                                                                   | VSFLSALEEYTK           | K | K | 95.00% | 87  | 693.8683 | 2 | 9.3 | 251  | 262  | No |
| 156 | IPI00021890; IPI00747151                                                     | HSD17B8 | ESTRADIOL 17-BETA-DEHYDROGENASE 8.; 24 KDA PROTEIN.                                                                                                                                                                                                                                               | AGVIGLTQTAAR           | K | E | 95.00% | 47  | 579.3407 | 2 | 7.9 | 174  | 185  | No |
|     |                                                                              |         |                                                                                                                                                                                                                                                                                                   | GNHAAFQADVSEAR         | R | A | 95.00% | 73  | 736.8537 | 2 | 7.7 | 67   | 80   | No |
|     |                                                                              |         |                                                                                                                                                                                                                                                                                                   | SALALVTGAGSGIGR        | R | A | 95.00% | 85  | 665.3843 | 2 | 8.7 | 11   | 25   | No |
|     |                                                                              |         |                                                                                                                                                                                                                                                                                                   | VGNVGQTNYAASK          | K | A | 95.00% | 47  | 654.8375 | 2 | 9.4 | 161  | 173  | No |
| 157 | IPI00021925                                                                  | CPT1B   | CARNITINE O-PALMITOYLTRANSFERASE I, MUSCLE ISOFORM.                                                                                                                                                                                                                                               | ALLDIADLFQVPK          | K | A | 95.00% | 63  | 721.9199 | 2 | 4.1 | 828  | 840  | No |
|     |                                                                              |         |                                                                                                                                                                                                                                                                                                   | DTDVLQHLSDSR           | K | H | 95.00% | 32  | 693.3437 | 2 | 9.7 | 393  | 404  | No |
|     |                                                                              |         |                                                                                                                                                                                                                                                                                                   | ILDDPSPPPQGEEK         | R | L | 95.00% | 50  | 761.3801 | 2 | 5.4 | 438  | 451  | No |
|     |                                                                              |         |                                                                                                                                                                                                                                                                                                   | KALLDIADLFQVPK         | R | A | 95.00% | 38  | 524.3168 | 3 | 8.7 | 827  | 840  | No |
|     |                                                                              |         |                                                                                                                                                                                                                                                                                                   | LLKPQDLEMQFOR          | R | I | 95.00% | 55  | 554.6282 | 3 | 0.1 | 425  | 437  | No |
|     |                                                                              |         |                                                                                                                                                                                                                                                                                                   | LSTSQIPQSQIR           | R | M | 95.00% | 31  | 679.3818 | 2 | 8.5 | 755  | 766  | No |
|     |                                                                              |         |                                                                                                                                                                                                                                                                                                   | SFTLISFK               | K | N | 95.00% | 35  | 471.7715 | 2 | 5.5 | 527  | 534  | No |
| 158 | IPI00022143; IPI00746655                                                     | FAM62A  | ISOFORM 1 OF PROTEIN FAM62A.; ISOFORM 2 OF PROTEIN FAM62A.                                                                                                                                                                                                                                        | ALTLGALTLPLAR          | R | L | 95.00% | 78  | 655.4168 | 2 | 3.7 | 561  | 573  | No |
|     |                                                                              |         |                                                                                                                                                                                                                                                                                                   | FFLQDPQSQELDVQVK       | R | D | 95.00% | 33  | 960.9974 | 2 | 8.3 | 531  | 546  | No |
|     |                                                                              |         |                                                                                                                                                                                                                                                                                                   | GNKEPNPMVQLSIQDVTQESK  | K | A | 95.00% | 42  | 786.7332 | 3 | 9.7 | 495  | 515  | No |
|     |                                                                              |         |                                                                                                                                                                                                                                                                                                   | HLSPTYATLVGDSSHK       | K | T | 95.00% | 46  | 571.6290 | 3 | 6.1 | 818  | 833  | No |
|     |                                                                              |         |                                                                                                                                                                                                                                                                                                   | LLAETVAPAVR            | K | G | 95.00% | 50  | 570.3469 | 2 | 6.2 | 160  | 170  | No |
|     |                                                                              |         |                                                                                                                                                                                                                                                                                                   | LLVPLVPDLQDVAQLR       | R | S | 95.00% | 76  | 895.0395 | 2 | 6.8 | 308  | 323  | No |
|     |                                                                              |         |                                                                                                                                                                                                                                                                                                   | LLVPLVPDLQDVAQLR       | R | S | 95.00% | 55  | 597.0296 | 3 | 8.0 | 308  | 323  | No |
|     |                                                                              |         |                                                                                                                                                                                                                                                                                                   | LTHVDSPLFAPAGPLGQVK    | R | L | 95.00% | 36  | 643.6223 | 3 | 8.5 | 958  | 976  | No |
|     |                                                                              |         |                                                                                                                                                                                                                                                                                                   | QLLDDEEQLTAK           | R | T | 95.00% | 66  | 701.8596 | 2 | 3.1 | 107  | 118  | No |
|     |                                                                              |         |                                                                                                                                                                                                                                                                                                   | SAELAAALLSIYMER        | K | A | 95.00% | 62  | 827.4344 | 2 | 5.3 | 802  | 816  | No |
|     |                                                                              |         |                                                                                                                                                                                                                                                                                                   | VQLDLAETDLSQGVAR       | K | W | 95.00% | 118 | 857.9568 | 2 | 4.8 | 1086 | 1101 | No |
|     |                                                                              |         | ALPHA 3 TYPE VI COLLAGEN ISOFORM 1 PRECURSOR.; ALPHA 3 TYPE VI COLLAGEN ISOFORM 3 PRECURSOR.; ALPHA 3 TYPE VI COLLAGEN ISOFORM 4 PRECURSOR.; ISOFORM 2 OF COLLAGEN ALPHA-3(VI) CHAIN PRECURSOR.; ALPHA 3 TYPE VI COLLAGEN ISOFORM 2 PRECURSOR.                                                    | LLTPITTLTSEIQIK        | K | L | 95.00% | 69  | 843.4940 | 2 | 6.4 | 1204 | 1218 | No |
| 159 | IPI00022200; IPI00072917; IPI00072918; IPI00220701; IPI00376964              | COL6A3  |                                                                                                                                                                                                                                                                                                   | LQPVLQPLPSPGVGGK       | R | R | 95.00% | 38  | 793.9743 | 2 | 8.5 | 1016 | 1031 | No |
|     |                                                                              |         |                                                                                                                                                                                                                                                                                                   | SVEDAQDVSALTQR         | K | G | 95.00% | 79  | 816.4230 | 2 | 8.6 | 1755 | 1769 | No |
|     |                                                                              |         |                                                                                                                                                                                                                                                                                                   | VPQIAFVITGGK           | R | S | 95.00% | 55  | 615.3719 | 2 | 8.0 | 1743 | 1754 | No |
|     |                                                                              |         | ISOFORM A OF PHOSPHATE CARRIER PROTEIN, MITOCHONDRIAL PRECURSOR.; ISOFORM B OF PHOSPHATE CARRIER PROTEIN, MITOCHONDRIAL PRECURSOR.; 31 KDA PROTEIN.; 36 KDA PROTEIN.; CDNA FLJ90278 FIS, CLONE NT2RP1000325, HIGHLY SIMILAR TO PHOSPHATECARRIER PROTEIN, MITOCHONDRIALPRECURSOR.; 24 KDA PROTEIN. | FGFYEVFK               | K | V | 95.00% | 28  | 518.7650 | 2 | 7.3 | 138  | 145  | No |
| 160 | IPI00022202; IPI00215777; IPI00788624; IPI00789657; IPI00790115; IPI00793177 | SLC25A3 |                                                                                                                                                                                                                                                                                                   | GIFNGFSVTLK            | K | E | 95.00% | 65  | 591.8336 | 2 | 5.9 | 102  | 112  | No |
|     |                                                                              |         |                                                                                                                                                                                                                                                                                                   | GSSASLVLKR             | K | L | 95.00% | 60  | 509.3076 | 2 | 1.7 | 296  | 305  | No |
|     |                                                                              |         |                                                                                                                                                                                                                                                                                                   | IQTQPGYANTLR           | R | D | 95.00% | 78  | 681.3658 | 2 | 4.3 | 190  | 201  | No |
|     |                                                                              |         |                                                                                                                                                                                                                                                                                                   | LPRPPPEMPESLK          | R | K | 95.00% | 32  | 535.2914 | 3 | 4.1 | 342  | 355  | No |
| 161 | IPI00022305                                                                  | BZW2    | BASIC LEUCINE ZIPPER AND W2 DOMAIN-CONTAINING PROTEIN 2.                                                                                                                                                                                                                                          | ADVLSEEAILK            | K | W | 95.00% | 83  | 594.3327 | 2 | 4.3 | 370  | 380  | No |
|     |                                                                              |         |                                                                                                                                                                                                                                                                                                   | DTLVQGLNEAGDDLEAVAK    | R | F | 95.00% | 113 | 979.4982 | 2 | 8.5 | 32   | 50   | No |
|     |                                                                              |         |                                                                                                                                                                                                                                                                                                   | LLELFPVNR              | R | Q | 95.00% | 34  | 550.8317 | 2 | 7.9 | 216  | 224  | No |
| 162 | IPI00022314                                                                  | SOD2    | SUPEROXIDE DISMUTASE [MN], MITOCHONDRIAL PRECURSOR.                                                                                                                                                                                                                                               | AIWNVINWENVTER         | K | Y | 95.00% | 79  | 872.4503 | 2 | 6.2 | 203  | 216  | No |
|     |                                                                              |         |                                                                                                                                                                                                                                                                                                   | AIWNVINWENVTER         | K | Y | 95.00% | 71  | 581.9689 | 3 | 5.3 | 203  | 216  | No |
|     |                                                                              |         |                                                                                                                                                                                                                                                                                                   | DFGSFDK                | R | F | 95.00% | 50  | 815.3646 | 1 | 8.6 | 124  | 130  | No |
|     |                                                                              |         |                                                                                                                                                                                                                                                                                                   | GDVTAQIALQPALK         | K | F | 95.00% | 109 | 712.9128 | 2 | 4.4 | 76   | 89   | No |
|     |                                                                              |         |                                                                                                                                                                                                                                                                                                   | GDVTAQIALQPALK         | K | F | 95.00% | 25  | 475.6118 | 3 | 5.8 | 76   | 89   | No |
|     |                                                                              |         |                                                                                                                                                                                                                                                                                                   | GELLEAIK               | K | R | 95.00% | 28  | 872.5176 | 1 | 9.3 | 115  | 122  | No |
|     |                                                                              |         |                                                                                                                                                                                                                                                                                                   | GELLEAIK               | K | R | 95.00% | 42  | 436.7610 | 2 | 5.5 | 115  | 122  | No |
|     |                                                                              |         |                                                                                                                                                                                                                                                                                                   | GELLEAIKR              | K | D | 95.00% | 61  | 514.8114 | 2 | 4.3 | 115  | 123  | No |
|     |                                                                              |         |                                                                                                                                                                                                                                                                                                   | HHAAYVNNLNVTEEK        | K | Y | 95.00% | 75  | 869.9321 | 2 | 3.0 | 54   | 68   | No |
|     |                                                                              |         |                                                                                                                                                                                                                                                                                                   | HHAAYVNNLNVTEEK        | K | Y | 95.00% | 58  | 580.2930 | 3 | 7.0 | 54   | 68   | No |
|     |                                                                              |         |                                                                                                                                                                                                                                                                                                   | HHAAYVNNLNVTEEKYQEALAK | K | G | 95.00% | 43  | 848.1018 | 3 | 8.4 | 54   | 75   | No |
|     |                                                                              |         |                                                                                                                                                                                                                                                                                                   | HHAAYVNNLNVTEEKYQEALAK | K | G | 95.00% | 46  | 636.3286 | 4 | 8.8 | 54   | 75   | No |
|     |                                                                              |         |                                                                                                                                                                                                                                                                                                   | NVRPDYLK               | K | A | 95.00% | 33  | 502.7837 | 2 | 6.6 | 195  | 202  | No |

| Index                  | Accession                | Gene    | Protein                                                                                    | Residue              | Mod                          | Score     | Length                           | Score                | Length                   | Score     | Length                                                       | Score                    | Length        | Score    | Length |     |     |          |    |
|------------------------|--------------------------|---------|--------------------------------------------------------------------------------------------|----------------------|------------------------------|-----------|----------------------------------|----------------------|--------------------------|-----------|--------------------------------------------------------------|--------------------------|---------------|----------|--------|-----|-----|----------|----|
| 163                    | IPI00022361; IPI00791534 | SLC4A1  | BAND 3 ANION TRANSPORT PROTEIN.; SOLUTE CARRIER FAMILY 4 ANION EXCHANGER MEMBER 1 VARIANT. | ADFLEQPVLGIVR        | R                            | L         | 95.00%                           | 76                   |                          | 745.9098  | 2                                                            | 7.3                      | 234           | 246      | No     |     |     |          |    |
|                        |                          |         |                                                                                            | ASTPAAAAQIQEVK       | K                            | E         | 95.00%                           | 69                   |                          | 685.8720  | 2                                                            | 5.9                      | 744           | 757      | No     |     |     |          |    |
|                        |                          |         |                                                                                            | ATFDEEGRDEYDEVAMPV   | K                            | -         | 95.00%                           | 66                   | M17: Oxidation           | 1109.4700 | 2                                                            | 8.7                      | 893           | 911      | No     |     |     |          |    |
|                        |                          |         |                                                                                            | FLFVLLGPEAPHIDYTLQGR | R                            | A         | 95.00%                           | 59                   |                          | 762.7523  | 3                                                            | 5.4                      | 264           | 283      | No     |     |     |          |    |
|                        |                          |         |                                                                                            | GWVVIHPLGLR          | R                            | S         | 95.00%                           | 27                   |                          | 574.3448  | 2                                                            | 6.7                      | 647           | 656      | No     |     |     |          |    |
|                        |                          |         |                                                                                            | HSAGLEALGGVVKPAVLTR  | K                            | S         | 95.00%                           | 73                   |                          | 681.3821  | 3                                                            | 7.8                      | 161           | 180      | No     |     |     |          |    |
|                        |                          |         |                                                                                            | HSAGLEALGGVVKPAVLTR  | K                            | S         | 95.00%                           | 103                  |                          | 511.2863  | 4                                                            | 3.3                      | 161           | 180      | No     |     |     |          |    |
|                        |                          |         |                                                                                            | IDAYMAQSR            | R                            | G         | 95.00%                           | 35                   | M5: Oxidation            | 535.7534  | 2                                                            | 4.7                      | 296           | 304      | No     |     |     |          |    |
|                        |                          |         |                                                                                            | IPPDSEATLVVGR        | K                            | A         | 95.00%                           | 110                  |                          | 733.9171  | 2                                                            | 3.0                      | 220           | 233      | No     |     |     |          |    |
|                        |                          |         |                                                                                            | IPPDSEATLVVGR        | K                            | A         | 95.00%                           | 33                   |                          | 489.6136  | 3                                                            | 2.1                      | 220           | 233      | No     |     |     |          |    |
|                        |                          |         |                                                                                            | LOEAAELEAVELVPIR     | R                            | F         | 95.00%                           | 126                  |                          | 939.0304  | 2                                                            | 7.6                      | 247           | 263      | No     |     |     |          |    |
|                        |                          |         |                                                                                            | LOEAAELEAVELVPIR     | R                            | F         | 95.00%                           | 83                   |                          | 626.3553  | 3                                                            | 6.1                      | 247           | 263      | No     |     |     |          |    |
|                        |                          |         |                                                                                            | SVTHANALVIMGK        | R                            | A         | 95.00%                           | 60                   | M11: Oxidation           | 672.8539  | 2                                                            | 4.0                      | 731           | 743      | No     |     |     |          |    |
|                        |                          |         |                                                                                            | TY'NYNVLMPVK         | K                            | P         | 95.00%                           | 36                   | M8: Oxidation            | 679.3481  | 2                                                            | 4.3                      | 552           | 562      | No     |     |     |          |    |
|                        |                          |         |                                                                                            | VLLPLIFR             | R                            | N         | 95.00%                           | 43                   |                          | 485.8283  | 2                                                            | 3.5                      | 872           | 879      | No     |     |     |          |    |
|                        |                          |         |                                                                                            | VYVELQELVMDEK        | K                            | N         | 95.00%                           | 100                  | M10: Oxidation           | 805.9091  | 2                                                            | 7.1                      | 57            | 69       | No     |     |     |          |    |
|                        |                          |         |                                                                                            | VYVELQELVMDEKNQELR   | K                            | W         | 95.00%                           | 62                   | M10: Oxidation           | 751.0538  | 3                                                            | 7.9                      | 57            | 74       | No     |     |     |          |    |
|                        |                          |         |                                                                                            | YQSSPAKPDSSFYK       | R                            | G         | 95.00%                           | 48                   |                          | 802.8889  | 2                                                            | 6.5                      | 347           | 360      | No     |     |     |          |    |
|                        |                          |         |                                                                                            | 164                  | IPI00022433                  | HSPB6     | ALPHA CRYSTALLIN FAMILY PROTEIN. | APSVLPAQVPTDPGHFSVLL | R                        | H         | 95.00%                                                       | 51                       |               | 853.1479 | 3      | 9.7 | 72  | 96       | No |
|                        |                          |         |                                                                                            |                      |                              |           |                                  | DVK                  | R                        | L         | 95.00%                                                       | 52                       |               | 597.3407 | 2      | 7.7 | 30  | 42       | No |
| ASAPLPGLSAPGR          | R                        | L       | 95.00%                                                                                     |                      |                              |           |                                  | 42                   |                          | 526.9212  | 3                                                            | 4.2                      | 118           | 130      | No     |     |     |          |    |
| HEERPDEHGFVAR          | R                        | E       | 95.00%                                                                                     |                      |                              |           |                                  | 36                   |                          | 1156.6100 | 1                                                            | 8.7                      | 97            | 106      | No     |     |     |          |    |
| HFSPEEIAVK             | K                        | V       | 95.00%                                                                                     |                      |                              |           |                                  | 54                   |                          | 578.8068  | 2                                                            | 4.7                      | 97            | 106      | No     |     |     |          |    |
| HFSPEEIAVK             | K                        | V       | 95.00%                                                                                     |                      |                              |           |                                  | 54                   |                          | 578.8068  | 2                                                            | 4.7                      | 97            | 106      | No     |     |     |          |    |
| LPPGVDPAAVTSALSPGVLSIQ | R                        | -       | 95.00%                                                                                     |                      |                              |           |                                  | 45                   |                          | 880.2362  | 4                                                            | 8.7                      | 138           | 175      | No     |     |     |          |    |
| AAPASQAQPPPAAK         | R                        | -       | 95.00%                                                                                     |                      |                              |           |                                  | 45                   |                          | 704.3876  | 5                                                            | 4.5                      | 138           | 175      | No     |     |     |          |    |
| LPPGVDPAAVTSALSPGVLSIQ | R                        | -       | 95.00%                                                                                     |                      |                              |           |                                  | 45                   |                          | 715.3743  | 2                                                            | 6.2                      | 29            | 42       | No     |     |     |          |    |
| AAPASQAQPPPAAK         | R                        | -       | 95.00%                                                                                     |                      |                              |           |                                  | 45                   | S3: Phospho              | 477.2516  | 3                                                            | 5.1                      | 29            | 42       | No     |     |     |          |    |
| RASAPLPGLSAPGR         | R                        | L       | 95.00%                                                                                     |                      |                              |           |                                  | 29                   | S3: Phospho              | 675.3929  | 2                                                            | 9.2                      | 29            | 42       | No     |     |     |          |    |
| RASAPLPGLSAPGR         | R                        | L       | 95.00%                                                                                     |                      |                              |           |                                  | 54                   |                          | 450.5959  | 3                                                            | 4.8                      | 29            | 42       | No     |     |     |          |    |
| RASAPLPGLSAPGR         | R                        | L       | 95.00%                                                                                     |                      |                              |           |                                  | 48                   |                          | 616.3341  | 2                                                            | 4.7                      | 107           | 117      | No     |     |     |          |    |
| VVGEHVHAR              | K                        | H       | 95.00%                                                                                     |                      |                              |           |                                  | 51                   |                          | 411.2250  | 3                                                            | 3.9                      | 107           | 117      | No     |     |     |          |    |
| VVGEHVHAR              | K                        | H       | 95.00%                                                                                     |                      |                              |           |                                  | 35                   |                          | 411.2250  | 3                                                            | 3.9                      | 107           | 117      | No     |     |     |          |    |
| 165                    | IPI00022442              | NDUFAB1 | ACYL CARRIER PROTEIN, MITOCHONDRIAL PRECURSOR.                                             |                      |                              |           |                                  | LVSNSHFMK            | K                        | D         | 95.00%                                                       | 50                       | M8: Oxidation | 539.7751 | 2      | 6.3 | 98  | 106      | No |
|                        |                          |         |                                                                                            |                      |                              |           |                                  | LYDKIDPEK            | K                        | L         | 95.00%                                                       | 46                       |               | 560.8010 | 2      | 4.4 | 89  | 97       | No |
|                        |                          |         |                                                                                            |                      |                              |           |                                  | VLYVLK               | R                        | L         | 95.00%                                                       | 20                       |               | 734.4867 | 1      | 6.9 | 83  | 88       | No |
|                        |                          |         |                                                                                            |                      |                              |           |                                  | 166                  | IPI00022463; IPI00798430 | TF        | SERO TRANSFERRIN PRECURSOR.; TRANSFERRIN VARIANT (FRAGMENT). | AIAANEADAVTL DAGLVYDAYLA | R             | E        | 95.00% | 29  |     | 989.2691 | 4  |
| PNNLKPVAEFYGSK         | K                        | H       | 95.00%                                                                                     |                      |                              |           |                                  |                      |                          |           |                                                              | 51                       |               | 489.7502 | 2      | 2.8 | 216 | 225      | No |
| DGAGDVAFVK             | K                        | D       | 95.00%                                                                                     | 28                   |                              | 635.3814  | 1                                |                      |                          |           |                                                              | 6.8                      | 311           | 315      | No     |     |     |          |    |
| DLLFK                  | K                        | D       | 95.00%                                                                                     | 28                   |                              | 437.7263  | 2                                |                      |                          |           |                                                              | 2.7                      | 316           | 323      | No     |     |     |          |    |
| DSAHGFLK               | K                        | V       | 95.00%                                                                                     | 35                   |                              | 606.2801  | 2                                |                      |                          |           |                                                              | 3.5                      | 123           | 132      | No     |     |     |          |    |
| DSGFQMNQLR             | K                        | G       | 95.00%                                                                                     | 77                   | M6: Oxidation                | 598.2828  | 2                                |                      |                          |           |                                                              | 3.9                      | 123           | 132      | No     |     |     |          |    |
| DSGFQMNQLR             | K                        | G       | 95.00%                                                                                     | 53                   |                              | 815.4177  | 2                                |                      |                          |           |                                                              | 6.9                      | 108           | 121      | No     |     |     |          |    |
| EDPQTFYAVAVVK          | K                        | K       | 95.00%                                                                                     | 35                   |                              | 543.9472  | 3                                |                      |                          |           |                                                              | 5.9                      | 108           | 121      | No     |     |     |          |    |
| EDPQTFYAVAVVK          | K                        | K       | 95.00%                                                                                     | 35                   |                              | 543.9472  | 3                                |                      |                          |           |                                                              | 5.9                      | 108           | 121      | No     |     |     |          |    |
| EFQLFSSPHGK            | K                        | D       | 95.00%                                                                                     | 58                   |                              | 638.8234  | 2                                |                      |                          |           |                                                              | 4.9                      | 300           | 310      | No     |     |     |          |    |
| EFQLFSSPHGK            | K                        | D       | 95.00%                                                                                     | 37                   |                              | 426.2182  | 3                                |                      |                          |           |                                                              | 5.0                      | 300           | 310      | No     |     |     |          |    |
| EGYYGYTGAFR            | K                        | C       | 95.00%                                                                                     | 61                   |                              | 642.2933  | 2                                |                      |                          |           |                                                              | 7.2                      | 531           | 541      | No     |     |     |          |    |
| HSTIFENLANK            | K                        | A       | 95.00%                                                                                     | 72                   |                              | 637.3325  | 2                                |                      |                          |           |                                                              | 2.3                      | 226           | 236      | No     |     |     |          |    |
| HSTIFENLANK            | K                        | A       | 95.00%                                                                                     | 45                   |                              | 425.2240  | 3                                |                      |                          |           |                                                              | 1.8                      | 226           | 236      | No     |     |     |          |    |
| IMNGEADAMSLDGGFVYIAGK  | K                        | C       | 95.00%                                                                                     | 138                  | M2: Oxidation, M9: Oxidation | 1096.0120 | 2                                |                      |                          |           |                                                              | 4.8                      | 400           | 420      | No     |     |     |          |    |
| IMNGEADAMSLDGGFVYIAGK  | K                        | C       | 95.00%                                                                                     | 76                   | M2: Oxidation, M9: Oxidation | 731.0112  | 3                                |                      |                          |           |                                                              | 5.8                      | 400           | 420      | No     |     |     |          |    |
| KSASDLTWDNLK           | K                        | G       | 95.00%                                                                                     | 63                   |                              | 689.3575  | 2                                |                      |                          |           |                                                              | 4.1                      | 453           | 464      | No     |     |     |          |    |
| MYLGYEYVTAIR           | K                        | N       | 95.00%                                                                                     | 75                   | M1: Oxidation                | 747.8732  | 2                                |                      |                          |           |                                                              | 5.6                      | 332           | 343      | No     |     |     |          |    |
| MYLGYEYVTAIR           | K                        | N       | 95.00%                                                                                     | 38                   | M1: Oxidation                | 498.9185  | 3                                |                      |                          |           |                                                              | 6.4                      | 332           | 343      | No     |     |     |          |    |
| MYLGYEYVTAIR           | K                        | N       | 95.00%                                                                                     | 64                   |                              | 739.8743  | 2                                |                      |                          |           |                                                              | 3.6                      | 332           | 343      | No     |     |     |          |    |
| SASDLTWDNLK            | K                        | G       | 95.00%                                                                                     | 79                   |                              | 625.3092  | 2                                | 3.2                  | 454                      | 464       | No                                                           |                          |               |          |        |     |     |          |    |
| SKEFQLFSSPHGK          | K                        | D       | 95.00%                                                                                     | 73                   |                              | 746.3862  | 2                                | 3.2                  | 298                      | 310       | No                                                           |                          |               |          |        |     |     |          |    |
| SKEFQLFSSPHGK          | K                        | D       | 95.00%                                                                                     | 43                   |                              | 497.9273  | 3                                | 4.3                  | 298                      | 310       | No                                                           |                          |               |          |        |     |     |          |    |
| SMGGKEDIWELLNQAQEHFGK  | R                        | D       | 95.00%                                                                                     | 41                   | M2: Oxidation                | 637.3181  | 4                                | 5.5                  | 274                      | 295       | No                                                           |                          |               |          |        |     |     |          |    |
| SMGGKEDIWELLNQAQEHFGK  | R                        | D       | 95.00%                                                                                     | 41                   |                              | 637.3181  | 4                                | 5.5                  | 274                      | 295       | No                                                           |                          |               |          |        |     |     |          |    |
| DK                     | R                        | S       | 95.00%                                                                                     | 33                   | M2: Oxidation                | 698.1014  | 4                                | 9.0                  | 274                      | 297       | No                                                           |                          |               |          |        |     |     |          |    |
| TAGWNIPMGLLYNK         | R                        | I       | 95.00%                                                                                     | 68                   | M8: Oxidation                | 797.4152  | 2                                | 7.8                  | 476                      | 489       | No                                                           |                          |               |          |        |     |     |          |    |

|                        |                          |       |                                                             |                        |                |          |                                            |                       |                |           |        |      |                |           |    |     |     |     |    |
|------------------------|--------------------------|-------|-------------------------------------------------------------|------------------------|----------------|----------|--------------------------------------------|-----------------------|----------------|-----------|--------|------|----------------|-----------|----|-----|-----|-----|----|
| 167                    | IPI00022744; IPI00219994 | CSE1L | ISOFORM 1 OF EXPORTIN-2.; ISOFORM 3 OF EXPORTIN-2.          | YLGEELYVK              | K              | A        | 95.00%                                     | 41                    |                | 500.7549  | 2      | 2.7  | 669            | 676       | No |     |     |     |    |
|                        |                          |       |                                                             | AADEEAFEDNSEEYIR       | R              | R        | 95.00%                                     | 90                    |                | 944.4019  | 2      | 3.9  | 356            | 371       | No |     |     |     |    |
|                        |                          |       |                                                             | ALTLPGSSENEYIMK        | K              | A        | 95.00%                                     | 36                    | M14: Oxidation | 834.9199  | 2      | 9.9  | 560            | 574       | No |     |     |     |    |
|                        |                          |       |                                                             | GSNTIASAAADKIPCLLGVFQK | R              | L        | 95.00%                                     | 38                    |                | 720.0691  | 3      | 1.9  | 715            | 736       | No |     |     |     |    |
|                        |                          |       |                                                             | HKDAAIYLVTSLASK        | K              | A        | 95.00%                                     | 28                    |                | 539.6414  | 3      | 4.4  | 426            | 440       | No |     |     |     |    |
|                        |                          |       |                                                             | IIIPEIQK               | K              | V        | 95.00%                                     | 30                    |                | 477.3079  | 2      | 4.6  | 825            | 832       | No |     |     |     |    |
|                        |                          |       |                                                             | LLQAFLEK               | R              | G        | 95.00%                                     | 56                    |                | 495.2936  | 2      | 0.8  | 707            | 714       | No |     |     |     |    |
|                        |                          |       |                                                             | LLQTDDEEEAGLLELLK      | K              | S        | 95.00%                                     | 117                   |                | 965.0086  | 2      | 1.1  | 252            | 268       | No |     |     |     |    |
|                        |                          |       |                                                             | LVLDAFALPLTNLFK        | K              | A        | 95.00%                                     | 53                    |                | 838.0029  | 2      | 8.6  | 175            | 189       | No |     |     |     |    |
|                        |                          |       |                                                             | QIFILLFQR              | K              | L        | 95.00%                                     | 45                    |                | 589.3625  | 2      | 6.2  | 769            | 777       | No |     |     |     |    |
|                        |                          |       |                                                             | QLSDAISIGR             | K              | E        | 95.00%                                     | 64                    |                | 586.8383  | 2      | 4.0  | 110            | 120       | No |     |     |     |    |
|                        |                          |       |                                                             | SANVNEFPVK             | K              | A        | 95.00%                                     | 46                    |                | 609.3350  | 2      | 7.5  | 471            | 481       | No |     |     |     |    |
|                        |                          |       |                                                             | TGNIPALVR              | R              | L        | 95.00%                                     | 34                    |                | 470.7866  | 2      | 7.8  | 698            | 706       | No |     |     |     |    |
|                        |                          |       |                                                             | 168                    | IPI00022774    | VCP      | TRANSITIONAL ENDOPLASMIC RETICULUM ATPASE. | AHVIVMAATNRPN SIDPALR | R              | R         | 95.00% | 41   | M6: Oxidation  | 721.3899  | 3  | 1.6 | 339 | 358 | No |
|                        |                          |       |                                                             |                        |                |          |                                            | AVANETGAFFFLINGPEIMSK | R              | L         | 95.00% | 121  | M19: Oxidation | 1136.5780 | 2  | 6.9 | 257 | 277 | No |
| AVANETGAFFFLINGPEIMSK  | R                        | L     | 95.00%                                                      |                        |                |          |                                            | 55                    | M19: Oxidation | 758.0562  | 3      | 9.0  | 257            | 277       | No |     |     |     |    |
| DHFEEAMR               | R                        | F     | 95.00%                                                      |                        |                |          |                                            | 30                    | M7: Oxidation  | 525.7220  | 2      | 4.5  | 734            | 741       | No |     |     |     |    |
| DVDLEFLAK              | K                        | M     | 95.00%                                                      |                        |                |          |                                            | 35                    |                | 1049.5550 | 1      | 2.7  | 669            | 677       | No |     |     |     |    |
| DVDLEFLAK              | K                        | M     | 95.00%                                                      |                        |                |          |                                            | 49                    |                | 525.2847  | 2      | 8.8  | 669            | 677       | No |     |     |     |    |
| ELQELVQYPVEHPDK        | R                        | F     | 95.00%                                                      |                        |                |          |                                            | 82                    |                | 912.4667  | 2      | 4.0  | 488            | 502       | No |     |     |     |    |
| ELQELVQYPVEHPDK        | R                        | F     | 95.00%                                                      |                        |                |          |                                            | 35                    |                | 608.6469  | 3      | 3.7  | 488            | 502       | No |     |     |     |    |
| ELQELVQYPVEHPDKFLK     | R                        | F     | 95.00%                                                      |                        |                |          |                                            | 48                    |                | 738.0648  | 3      | 6.0  | 488            | 505       | No |     |     |     |    |
| ESIESEIR               | R                        | R     | 95.00%                                                      |                        |                |          |                                            | 34                    |                | 481.7457  | 2      | 4.2  | 701            | 708       | No |     |     |     |    |
| ETVVEVPQVTWEDIGGLEDVKR | R                        | E     | 95.00%                                                      |                        |                |          |                                            | 40                    |                | 833.4382  | 3      | 8.4  | 466            | 487       | No |     |     |     |    |
| EVDIGIPDATGR           | R                        | L     | 95.00%                                                      |                        |                |          |                                            | 59                    |                | 621.8230  | 2      | 3.9  | 366            | 377       | No |     |     |     |    |
| EVDIGIPDATGRLEILQIHTK  | R                        | N     | 95.00%                                                      |                        |                |          |                                            | 29                    |                | 773.4324  | 3      | 4.0  | 366            | 386       | No |     |     |     |    |
| FDREVDIGIPDATGR        | R                        | L     | 95.00%                                                      |                        |                |          |                                            | 48                    |                | 830.9245  | 2      | 6.8  | 363            | 377       | No |     |     |     |    |
| GILLYGPPGTGK           | R                        | T     | 95.00%                                                      |                        |                |          |                                            | 54                    |                | 586.8423  | 2      | 7.3  | 240            | 251       | No |     |     |     |    |
| IVSQLLTMDGLK           | R                        | Q     | 95.00%                                                      |                        |                |          |                                            | 71                    | M9: Oxidation  | 723.9208  | 2      | 6.5  | 324            | 336       | No |     |     |     |    |
| IVSQLLTMDGLK           | R                        | Q     | 95.00%                                                      |                        |                |          |                                            | 47                    | M9: Oxidation  | 482.9494  | 3      | 5.7  | 324            | 336       | No |     |     |     |    |
| IVSQLLTMDGLK           | R                        | Q     | 95.00%                                                      |                        |                |          |                                            | 71                    |                | 715.9224  | 2      | 5.1  | 324            | 336       | No |     |     |     |    |
| KGDFLVR                | R                        | G     | 95.00%                                                      |                        |                |          |                                            | 29                    |                | 474.2890  | 2      | 2.3  | 148            | 155       | No |     |     |     |    |
| KYEMFAQTLQQR           | R                        | G     | 95.00%                                                      |                        |                |          |                                            | 100                   | M4: Oxidation  | 823.4111  | 2      | 8.2  | 754            | 766       | No |     |     |     |    |
| LAGESESNLR             | K                        | K     | 95.00%                                                      |                        |                |          |                                            | 60                    |                | 538.2746  | 2      | 2.7  | 278            | 287       | No |     |     |     |    |
| LDQLIYIPLDEK           | R                        | S     | 95.00%                                                      |                        |                |          |                                            | 93                    |                | 778.9366  | 2      | 4.7  | 639            | 651       | No |     |     |     |    |
| LEILQIHTK              | R                        | N     | 95.00%                                                      |                        |                |          |                                            | 56                    |                | 547.8361  | 2      | 6.1  | 378            | 386       | No |     |     |     |    |
| LIVDEAINEDNSVVSLSQPK   | R                        | M     | 95.00%                                                      |                        |                |          |                                            | 138                   |                | 1085.5770 | 2      | 9.8  | 26             | 45        | No |     |     |     |    |
| LIVDEAINEDNSVVSLSQPK   | R                        | M     | 95.00%                                                      |                        |                |          |                                            | 65                    |                | 724.0522  | 3      | 7.7  | 26             | 45        | No |     |     |     |    |
| MDELQLFR               | K                        | G     | 95.00%                                                      |                        |                |          |                                            | 59                    | M1: Oxidation  | 534.2659  | 2      | 3.9  | 46             | 53        | No |     |     |     |    |
| NAPAIIFIDELDAIAPK      | K                        | R     | 95.00%                                                      |                        |                |          |                                            | 112                   |                | 906.0078  | 2      | 6.5  | 296            | 312       | No |     |     |     |    |
| NAPAIIFIDELDAIAPK      | K                        | R     | 95.00%                                                      |                        |                |          |                                            | 73                    |                | 604.3400  | 3      | 4.7  | 296            | 312       | No |     |     |     |    |
| NVFIIGATNRPDIDPAILRPGR | K                        | L     | 95.00%                                                      |                        |                |          |                                            | 40                    |                | 840.1514  | 3      | 4.9  | 616            | 638       | No |     |     |     |    |
| QTNPSAMEVEEDDPVPEIR    | R                        | R     | 95.00%                                                      |                        |                |          |                                            | 62                    | M7: Oxidation  | 1086.5010 | 2      | 7.6  | 714            | 732       | No |     |     |     |    |
| QTNPSAMEVEEDDPVPEIRR   | R                        | D     | 95.00%                                                      | 37                     | M7: Oxidation  | 776.7013 | 3                                          | 4.4                   | 714            | 733       | No     |      |                |           |    |     |     |     |    |
| VINQILTEMDGMSTK        | R                        | K     | 95.00%                                                      | 76                     | M9: Oxidation, | 856.4212 | 2                                          | 5.7                   | 600            | 614       | No     |      |                |           |    |     |     |     |    |
| WALSQSNPSALR           | R                        | E     | 95.00%                                                      | 97                     | M12: Oxidation | 665.3519 | 2                                          | 3.4                   | 454            | 465       | No     |      |                |           |    |     |     |     |    |
| 169                    | IPI00022793              | HADHB | TRIFUNCTIONAL ENZYME BETA SUBUNIT, MITOCHONDRIAL PRECURSOR. | AALTGLLHR              | R              | T        | 95.00%                                     | 83                    |                | 476.2937  | 2      | 5.8  | 83             | 91        | No |     |     |     |    |
|                        |                          |       |                                                             | ALAMGYKPK              | K              | A        | 95.00%                                     | 30                    | M4: Oxidation  | 497.7773  | 2      | 7.1  | 327            | 335       | No |     |     |     |    |
|                        |                          |       |                                                             | AMSDWFAENYMGR          | K              | K        | 95.00%                                     | 87                    | M2: Oxidation, | 862.8467  | 2      | 10.0 | 393            | 406       | No |     |     |     |    |
|                        |                          |       |                                                             | AQDEGLLSDVVPFK         | K              | V        | 95.00%                                     | 83                    | M12: Oxidation | 759.4033  | 2      | 8.8  | 256            | 269       | No |     |     |     |    |
|                        |                          |       |                                                             | AQDEGLLSDVVPFKVPGK     | K              | D        | 95.00%                                     | 65                    |                | 633.6846  | 3      | 7.9  | 256            | 273       | No |     |     |     |    |
|                        |                          |       |                                                             | AQDEGLLSDVVPFKVPGKDTVT | K              | D        | 95.00%                                     | 46                    |                | 815.1126  | 3      | 5.6  | 256            | 278       | No |     |     |     |    |
|                        |                          |       |                                                             | AQDEGLLSDVVPFKVPGKDTVT | K              | D        | 95.00%                                     | 35                    |                | 611.5851  | 4      | 3.4  | 256            | 278       | No |     |     |     |    |
|                        |                          |       |                                                             | DFMYVSQDPK             | R              | D        | 95.00%                                     | 55                    | M3: Oxidation  | 623.2789  | 2      | 3.0  | 340            | 349       | No |     |     |     |    |
|                        |                          |       |                                                             | DLMPHDLAR              | K              | A        | 95.00%                                     | 43                    | M3: Oxidation  | 542.2696  | 2      | 5.1  | 74             | 82        | No |     |     |     |    |
|                        |                          |       |                                                             | DNGIRPSSLEQMAK         | K              | L        | 95.00%                                     | 44                    | M12: Oxidation | 781.3884  | 2      | 2.8  | 279            | 292       | No |     |     |     |    |
|                        |                          |       |                                                             | DQLLLGPTYATPK          | K              | V        | 95.00%                                     | 78                    |                | 708.8956  | 2      | 6.5  | 350            | 362       | No |     |     |     |    |
|                        |                          |       |                                                             | EAALGAGFSDK            | R              | T        | 95.00%                                     | 76                    |                | 1065.5280 | 1      | 6.2  | 119            | 129       | No |     |     |     |    |
|                        |                          |       |                                                             | EAALGAGFSDK            | R              | T        | 95.00%                                     | 47                    |                | 533.2671  | 2      | 4.4  | 119            | 129       | No |     |     |     |    |
|                        |                          |       |                                                             | EVVDYIIFGTVIQEVK       | K              | T        | 95.00%                                     | 121                   |                | 926.5152  | 2      | 6.3  | 97             | 112       | No |     |     |     |    |
|                        |                          |       |                                                             | EVVDYIIFGTVIQEVK       | K              | T        | 95.00%                                     | 75                    |                | 618.0138  | 3      | 8.1  | 97             | 112       | No |     |     |     |    |
| KAQDEGLLSDVVPFK        | K                        | V     | 95.00%                                                      | 118                    |                | 823.4510 | 2                                          | 8.5                   | 255            | 269       | No     |      |                |           |    |     |     |     |    |

|     |                          |         |                                  |                                                                                    |   |   |        |     |                 |           |   |     |     |     |    |
|-----|--------------------------|---------|----------------------------------|------------------------------------------------------------------------------------|---|---|--------|-----|-----------------|-----------|---|-----|-----|-----|----|
|     |                          |         |                                  | KAQDEGLLSDVVPFKVPGK                                                                | K | D | 95.00% | 88  |                 | 1014.0720 | 2 | 8.6 | 255 | 273 | No |
|     |                          |         |                                  | KAQDEGLLSDVVPFKVPGK                                                                | K | D | 95.00% | 63  |                 | 676.3826  | 3 | 7.0 | 255 | 273 | No |
|     |                          |         |                                  | KAQDEGLLSDVVPFKVPGK                                                                | K | D | 95.00% | 34  |                 | 507.5377  | 4 | 4.5 | 255 | 273 | No |
|     |                          |         |                                  | KLMLDLNK                                                                           | R | A | 95.00% | 27  | M3: Oxidation   | 495.7891  | 2 | 4.4 | 182 | 189 | No |
|     |                          |         |                                  | LAAAFVSR                                                                           | R | L | 95.00% | 34  |                 | 905.5255  | 1 | 5.2 | 231 | 239 | No |
|     |                          |         |                                  | LAAAFVSR                                                                           | R | L | 95.00% | 71  |                 | 453.2667  | 2 | 5.4 | 231 | 239 | No |
|     |                          |         |                                  | LEQDEYALR                                                                          | R | S | 95.00% | 58  |                 | 568.7866  | 2 | 5.7 | 240 | 248 | No |
|     |                          |         |                                  | LKPAFIKPYGTVTAANSSFLTDG                                                            |   |   |        |     | M27: Oxidation, |           |   |     |     |     |    |
|     |                          |         |                                  | ASAMLIMAEK                                                                         | K | A | 95.00% | 60  | M30: Oxidation  | 901.9706  | 4 | 8.5 | 293 | 326 | No |
|     |                          |         |                                  | LMLDLNK                                                                            | K | A | 95.00% | 38  | M2: Oxidation   | 431.7403  | 2 | 2.0 | 183 | 189 | No |
|     |                          |         |                                  | NVVDGVR                                                                            | R | T | 95.00% | 49  |                 | 956.5596  | 1 | 7.1 | 54  | 62  | No |
|     |                          |         |                                  | NVVDGVR                                                                            | R | T | 95.00% | 60  |                 | 478.7828  | 2 | 5.2 | 54  | 62  | No |
|     |                          |         |                                  | TPFLLSGTSYK                                                                        | R | D | 95.00% | 38  |                 | 1213.6570 | 1 | 8.7 | 63  | 73  | No |
|     |                          |         |                                  | TPFLLSGTSYK                                                                        | R | D | 95.00% | 74  |                 | 607.3303  | 2 | 4.9 | 63  | 73  | No |
|     |                          |         |                                  | TPFLLSGTSYKDLMPHDLAR                                                               | R | A | 95.00% | 33  | M14: Oxidation  | 760.0622  | 3 | 7.3 | 63  | 82  | No |
|     |                          |         |                                  | VGLPPEK                                                                            | K | F | 95.00% | 32  |                 | 852.5231  | 1 | 4.0 | 410 | 417 | No |
|     |                          |         |                                  | VGLPPEK                                                                            | K | F | 95.00% | 42  |                 | 426.7653  | 2 | 3.7 | 410 | 417 | No |
| 170 | IPI00022891              | SLC25A4 | ADP/ATP TRANSLCOCASE 1.          | AAYFGVYDTAK                                                                        | R | G | 95.00% | 43  |                 | 1205.5870 | 1 | 2.3 | 189 | 199 | No |
|     |                          |         |                                  | AAYFGVYDTAK                                                                        | R | G | 95.00% | 71  |                 | 603.2985  | 2 | 3.9 | 189 | 199 | No |
|     |                          |         |                                  | DFLAGGVAAAVSK                                                                      | K | T | 95.00% | 53  |                 | 1205.6620 | 1 | 7.4 | 11  | 23  | No |
|     |                          |         |                                  | DFLAGGVAAAVSK                                                                      | K | T | 95.00% | 108 |                 | 603.3334  | 2 | 4.9 | 11  | 23  | No |
|     |                          |         |                                  | DFLAGGVAAAVSK                                                                      | K | T | 95.00% | 30  |                 | 402.5585  | 3 | 5.5 | 11  | 23  | No |
|     |                          |         |                                  | EQGFLSFWR                                                                          | K | G | 95.00% | 56  |                 | 585.2931  | 2 | 3.4 | 64  | 72  | No |
|     |                          |         |                                  | GAWSNVLNR                                                                          | K | G | 95.00% | 56  |                 | 451.7482  | 2 | 4.1 | 273 | 280 | No |
|     |                          |         |                                  | GMGGAFVLVLYDEIKK                                                                   | R | Y | 95.00% | 90  | M2: Oxidation   | 878.4780  | 2 | 7.1 | 281 | 296 | No |
|     |                          |         |                                  | GMGGAFVLVLYDEIKK                                                                   | R | Y | 95.00% | 52  | M2: Oxidation   | 585.9869  | 3 | 5.4 | 281 | 296 | No |
|     |                          |         |                                  | GNLANVIR                                                                           | R | Y | 95.00% | 56  |                 | 428.7553  | 2 | 2.7 | 73  | 80  | No |
|     |                          |         |                                  | LLLQVQHASK                                                                         | K | Q | 95.00% | 50  |                 | 568.8482  | 2 | 8.2 | 34  | 43  | No |
|     |                          |         |                                  | QLFLGGVDR                                                                          | K | H | 95.00% | 32  |                 | 1004.5600 | 1 | 6.9 | 97  | 105 | No |
|     |                          |         |                                  | QLFLGGVDR                                                                          | K | H | 95.00% | 66  |                 | 502.7817  | 2 | 2.5 | 97  | 105 | No |
|     |                          |         |                                  | TAVAPIER                                                                           | K | V | 95.00% | 42  |                 | 428.7499  | 2 | 3.1 | 24  | 31  | No |
|     |                          |         |                                  | YFPTQALNFQK                                                                        | R | D | 95.00% | 88  |                 | 723.8805  | 2 | 7.6 | 81  | 92  | No |
| 171 | IPI00023191              | TOM1    | TARGET OF MYB1.                  | AGLQSLASGR                                                                         | R | L | 95.00% | 40  |                 | 544.7911  | 2 | 3.9 | 351 | 361 | No |
|     |                          |         |                                  | EVKYEAPQATDGLGALDAR                                                                | K | Q | 95.00% | 37  |                 | 692.3565  | 3 | 6.2 | 383 | 402 | No |
|     |                          |         |                                  | FHVLVASQDFVESVLR                                                                   | R | T | 95.00% | 50  |                 | 649.0284  | 3 | 7.8 | 85  | 101 | No |
|     |                          |         |                                  | LEDEFDMFALTR                                                                       | R | G | 95.00% | 39  | M7: Oxidation   | 751.8520  | 2 | 8.3 | 362 | 373 | No |
|     |                          |         |                                  | SELEMVSGNVR                                                                        | R | V | 95.00% | 40  | M5: Oxidation   | 618.8022  | 2 | 5.8 | 222 | 232 | No |
|     |                          |         |                                  | SSPDLTGVTIYEDLR                                                                    | R | R | 95.00% | 90  |                 | 882.9630  | 2 | 9.0 | 130 | 145 | No |
|     |                          |         |                                  | VLNLIQSWADAFR                                                                      | K | S | 95.00% | 77  |                 | 766.9226  | 2 | 9.7 | 117 | 129 | No |
|     |                          |         |                                  | YEAPQATDGLGALDAR                                                                   | K | Q | 95.00% | 111 |                 | 859.9270  | 2 | 6.4 | 386 | 402 | No |
|     |                          |         |                                  | ISOFORM 1 OF INOSITOL MONOPHOSPHATASE 2.; ISOFORM 2 OF INOSITOL MONOPHOSPHATASE 2. |   |   |        |     |                 |           |   |     |     |     |    |
| 172 | IPI00023635; IPI00555726 | IMPA2   |                                  | ALVLTGIGPK                                                                         | K | R | 95.00% | 58  |                 | 520.8258  | 2 | 7.6 | 168 | 177 | No |
|     |                          |         |                                  | FIAEAAAASGAK                                                                       | R | C | 95.00% | 59  |                 | 582.8025  | 2 | 6.1 | 78  | 89  | No |
| 173 | IPI00023640              | PDCD5   | PROGRAMMED CELL DEATH PROTEIN 5. | LSNLALVKPEK                                                                        | R | T | 95.00% | 40  |                 | 606.3757  | 2 | 5.8 | 56  | 66  | No |
|     |                          |         |                                  | LSNLALVKPEK                                                                        | R | T | 95.00% | 29  |                 | 404.5854  | 3 | 3.4 | 56  | 66  | No |
|     |                          |         |                                  | NSILAQVLDQSAR                                                                      | R | A | 95.00% | 77  |                 | 707.8915  | 2 | 6.9 | 41  | 53  | No |
|     |                          |         |                                  | VSEGLIEILK                                                                         | K | K | 95.00% | 31  |                 | 614.8668  | 2 | 8.4 | 87  | 97  | No |
|     |                          |         |                                  | VSEGLIEILK                                                                         | K | V | 95.00% | 33  |                 | 452.9439  | 3 | 4.1 | 87  | 98  | No |
| 174 | IPI00024046              | CDH13   | CADHERIN-13 PRECURSOR.           | DIQGSQDIFK                                                                         | K | F | 95.00% | 65  |                 | 632.3358  | 2 | 4.1 | 116 | 126 | No |
|     |                          |         |                                  | INENTGSVSVTR                                                                       | R | T | 95.00% | 59  |                 | 638.8330  | 2 | 6.6 | 190 | 201 | No |
|     |                          |         |                                  | MTAFDADDPATDNALLR                                                                  | R | Y | 95.00% | 122 | M1: Oxidation   | 926.9323  | 2 | 9.7 | 267 | 283 | No |
|     |                          |         |                                  | SIVVSPILIPENQR                                                                     | R | Q | 95.00% | 36  |                 | 782.9644  | 2 | 9.4 | 139 | 152 | No |
|     |                          |         |                                  | TLEGVPVLEVIDQNDNRPIFR                                                              | K | E | 95.00% | 45  |                 | 878.8210  | 3 | 8.2 | 224 | 246 | No |
| 175 | IPI00024157              | FKBP3   | FK506-BINDING PROTEIN 3.         | ARLEIEPEWAYGK                                                                      | K | K | 95.00% | 44  |                 | 781.4122  | 2 | 9.5 | 188 | 200 | No |
|     |                          |         |                                  | DHLVTAYNHLFETK                                                                     | K | R | 95.00% | 31  |                 | 563.2921  | 3 | 9.6 | 57  | 70  | No |
|     |                          |         |                                  | ETKSEETLDEGPPK                                                                     | K | Y | 95.00% | 78  |                 | 780.3796  | 2 | 4.5 | 97  | 110 | No |
|     |                          |         |                                  | FLQEHGSDSFLAEHK                                                                    | K | L | 95.00% | 87  |                 | 872.9244  | 2 | 6.6 | 28  | 42  | No |
|     |                          |         |                                  | FLQEHGSDSFLAEHK                                                                    | K | L | 95.00% | 52  |                 | 582.2857  | 3 | 6.9 | 28  | 42  | No |
|     |                          |         |                                  | GWDEALLTMSK                                                                        | R | G | 95.00% | 52  | M9: Oxidation   | 633.8118  | 2 | 9.2 | 174 | 184 | No |
|     |                          |         |                                  | SEETLDEGPPK                                                                        | K | Y | 95.00% | 61  |                 | 601.2867  | 2 | 5.4 | 100 | 110 | No |
|     |                          |         |                                  | SEETLDEGPPKYTK                                                                     | K | S | 95.00% | 50  |                 | 797.3919  | 2 | 6.8 | 100 | 113 | No |
|     |                          |         |                                  | ISOFORM 1 OF PROTEASOME SUBUNIT ALPHA TYPE 7.                                      |   |   |        |     |                 |           |   |     |     |     |    |
| 176 | IPI00024175              | PSMA7   |                                  | ALLEVVQSGGK                                                                        | K | N | 95.00% | 63  |                 | 550.8232  | 2 | 6.3 | 194 | 204 | No |
|     |                          |         |                                  | GRDIVLVGVEK                                                                        | R | K | 95.00% | 48  |                 | 592.8597  | 2 | 9.3 | 37  | 47  | No |
|     |                          |         |                                  | LTVEDPVTVEYITR                                                                     | R | Y | 95.00% | 93  |                 | 817.9420  | 2 | 7.2 | 96  | 109 | No |
|     |                          |         |                                  | NYTDEAIETDDLTIK                                                                    | K | L | 95.00% | 94  |                 | 870.9199  | 2 | 7.8 | 175 | 189 | No |
|     |                          |         |                                  | YVAIEIEKEEENEK                                                                     | K | K | 95.00% | 83  |                 | 869.4390  | 2 | 8.9 | 228 | 241 | No |

|                         |                          |      |                                                                                                                     |                         |                                       |           |                                                                                                                                                                                                                      |                |                |           |        |      |               |          |     |     |     |     |     |
|-------------------------|--------------------------|------|---------------------------------------------------------------------------------------------------------------------|-------------------------|---------------------------------------|-----------|----------------------------------------------------------------------------------------------------------------------------------------------------------------------------------------------------------------------|----------------|----------------|-----------|--------|------|---------------|----------|-----|-----|-----|-----|-----|
| 177                     | IPI00024664; IPI00375145 | USP5 | ISOFORM LONG OF UBIQUITIN CARBOXYL-TERMINAL HYDROLASE 5.; ISOFORM SHORT OF UBIQUITIN CARBOXYL-TERMINAL HYDROLASE 5. | DGLGGLPDIVR             | R                                     | D         | 95.00%                                                                                                                                                                                                               | 35             |                | 556.3129  | 2      | 5.7  | 134           | 144      | No  |     |     |     |     |
|                         |                          |      |                                                                                                                     | DRVTSAVEALLSADSASR      | R                                     | K         | 95.00%                                                                                                                                                                                                               | 36             |                | 616.6563  | 3      | 3.7  | 145           | 162      | No  |     |     |     |     |
|                         |                          |      |                                                                                                                     | EEDPATGTGDDPPR          | K                                     | K         | 95.00%                                                                                                                                                                                                               | 33             |                | 671.3005  | 2      | 0.5  | 81            | 93       | No  |     |     |     |     |
|                         |                          |      |                                                                                                                     | FASFPDYLVIIQK           | R                                     | K         | 95.00%                                                                                                                                                                                                               | 80             |                | 770.9304  | 2      | 7.4  | 562           | 574      | No  |     |     |     |     |
|                         |                          |      |                                                                                                                     | IFQNAPTDPTQDFSTQVAK     | K                                     | L         | 95.00%                                                                                                                                                                                                               | 107            |                | 1054.5290 | 2      | 10.0 | 361           | 379      | No  |     |     |     |     |
|                         |                          |      |                                                                                                                     | IFQNAPTDPTQDFSTQVAK     | K                                     | L         | 95.00%                                                                                                                                                                                                               | 53             |                | 703.3518  | 3      | 4.6  | 361           | 379      | No  |     |     |     |     |
|                         |                          |      |                                                                                                                     | IGEWELIQESGVPLKPLFGPGYT |                                       |           |                                                                                                                                                                                                                      |                |                |           |        |      |               |          |     |     |     |     |     |
|                         |                          |      |                                                                                                                     | GIR                     | R                                     | N         | 95.00%                                                                                                                                                                                                               | 45             |                | 952.8576  | 3      | 9.5  | 304           | 329      | No  |     |     |     |     |
|                         |                          |      |                                                                                                                     | IVILPDYLEIAR            | K                                     | D         | 95.00%                                                                                                                                                                                                               | 51             |                | 707.9214  | 2      | 2.7  | 122           | 133      | No  |     |     |     |     |
|                         |                          |      |                                                                                                                     | LGHGLLSGEYSKPVPESGDGER  |                                       |           |                                                                                                                                                                                                                      |                |                |           |        |      |               |          |     |     |     |     |     |
|                         |                          |      |                                                                                                                     | VPEQK                   | K                                     | E         | 95.00%                                                                                                                                                                                                               | 30             |                | 717.1188  | 4      | 4.7  | 380           | 406      | No  |     |     |     |     |
|                         |                          |      |                                                                                                                     | SAADSISESVVPGPK         | R                                     | V         | 95.00%                                                                                                                                                                                                               | 59             |                | 722.3738  | 2      | 4.5  | 756           | 770      | No  |     |     |     |     |
|                         |                          |      |                                                                                                                     | VDYIMQLPVPMDAALNKEELLEY |                                       |           |                                                                                                                                                                                                                      |                |                |           |        |      |               |          |     |     |     |     |     |
|                         |                          |      |                                                                                                                     | E EK                    | R                                     | K         | 95.00%                                                                                                                                                                                                               | 34             | M5: Oxidation, |           |        |      |               |          |     |     |     |     |     |
|                         |                          |      |                                                                                                                     | VTSAVEALLSADSASR        | R                                     | K         | 95.00%                                                                                                                                                                                                               | 64             | M11: Oxidation | 1038.1850 | 3      | 8.9  | 483           | 508      | No  |     |     |     |     |
|                         |                          |      |                                                                                                                     | YFDGSGGNNHAVEHYR        | R                                     | E         | 95.00%                                                                                                                                                                                                               | 40             |                | 788.9177  | 2      | 6.0  | 147           | 162      | No  |     |     |     |     |
|                         |                          |      |                                                                                                                     |                         |                                       |           |                                                                                                                                                                                                                      |                |                | 608.2707  | 3      | 3.7  | 223           | 238      | No  |     |     |     |     |
|                         |                          |      |                                                                                                                     | 178                     | IPI00024670; IPI00744902              | REEP5     | RECEPTOR EXPRESSION-ENHANCING PROTEIN 5.; 21 KDA PROTEIN.                                                                                                                                                            | ATVNLLGEEK     | K              | K         | 95.00% | 58   |               | 537.3001 | 2   | 7.4 | 177 | 186 | No  |
|                         |                          |      |                                                                                                                     |                         |                                       |           |                                                                                                                                                                                                                      | KATVNLLGEEKK   | K              | S         | 95.00% | 31   |               | 665.3962 | 2   | 7.8 | 176 | 187 | No  |
|                         |                          |      |                                                                                                                     | 179                     | IPI00024804; IPI00396118; IPI00794585 | ATP2A1    | ISOFORM SERCA1B OF SARCOPLASMIC/ENDOPLASMIC RETICULUM CALCIUM ATPASE1.; ISOFORM SERCA1A OF SARCOPLASMIC/ENDOPLASMIC RETICULUM CALCIUM ATPASE1.; SIMILAR TO ATPASE, CA++ TRANSPORTING, CARDIAC MUSCLE, FAST TWITCH 1. | AEIGIAMSGTAVAK | K              | T         | 95.00% | 109  | M7: Oxidation | 696.3662 | 2   | 2.9 | 714 | 728 | Yes |
| AEIGIAMSGTAVAK          | K                        | T    | 95.00%                                                                                                              |                         |                                       |           |                                                                                                                                                                                                                      | 94             |                | 688.3702  | 2      | 5.1  | 714           | 728      | Yes |     |     |     |     |
| ALDLTQWLMVLK            | R                        | I    | 95.00%                                                                                                              |                         |                                       |           |                                                                                                                                                                                                                      | 85             | M9: Oxidation  | 723.9096  | 2      | 5.7  | 961           | 972      | No  |     |     |     |     |
| ALDLTQWLMVLK            | R                        | I    | 95.00%                                                                                                              |                         |                                       |           |                                                                                                                                                                                                                      | 61             | M9: Oxidation  | 482.9422  | 3      | 5.4  | 961           | 972      | No  |     |     |     |     |
| ALDLTQWLMVLK            | R                        | I    | 95.00%                                                                                                              |                         |                                       |           |                                                                                                                                                                                                                      | 83             |                | 715.9114  | 2      | 4.6  | 961           | 972      | No  |     |     |     |     |
| ALGIVATTGVGTEIGK        | K                        | I    | 95.00%                                                                                                              |                         |                                       |           |                                                                                                                                                                                                                      | 125            |                | 743.9348  | 2      | 9.0  | 219           | 234      | No  |     |     |     |     |
| ALGIVATTGVGTEIGK        | K                        | I    | 95.00%                                                                                                              |                         |                                       |           |                                                                                                                                                                                                                      | 65             |                | 496.2899  | 3      | 3.8  | 219           | 234      | No  |     |     |     |     |
| ARDIVPGDIVEVAVGDK       | K                        | V    | 95.00%                                                                                                              |                         |                                       |           |                                                                                                                                                                                                                      | 34             |                | 584.9923  | 3      | 6.5  | 142           | 158      | No  |     |     |     |     |
|                         |                          |      |                                                                                                                     |                         |                                       |           |                                                                                                                                                                                                                      |                |                |           |        |      |               |          |     |     |     |     |     |
| ARDIVPGDIVEVAVGDKVPADIR | K                        | I    | 95.00%                                                                                                              |                         |                                       |           |                                                                                                                                                                                                                      | 105            |                | 802.1172  | 3      | 6.7  | 142           | 164      | No  |     |     |     |     |
|                         |                          |      |                                                                                                                     |                         |                                       |           |                                                                                                                                                                                                                      |                |                |           |        |      |               |          |     |     |     |     |     |
| ARDIVPGDIVEVAVGDKVPADIR | K                        | I    | 95.00%                                                                                                              |                         |                                       |           |                                                                                                                                                                                                                      | 72             |                | 601.8405  | 4      | 7.7  | 142           | 164      | No  |     |     |     |     |
| AYTGREFDDLPLAEQR        | R                        | E    | 95.00%                                                                                                              |                         |                                       |           |                                                                                                                                                                                                                      | 38             |                | 627.6468  | 3      | 5.3  | 652           | 667      | No  |     |     |     |     |
| DIVPGDIVEVAVGDK         | R                        | V    | 95.00%                                                                                                              |                         |                                       |           |                                                                                                                                                                                                                      | 97             |                | 763.4149  | 2      | 6.8  | 144           | 158      | No  |     |     |     |     |
| DIVPGDIVEVAVGDK         | R                        | V    | 95.00%                                                                                                              |                         |                                       |           |                                                                                                                                                                                                                      | 54             |                | 509.2786  | 3      | 5.5  | 144           | 158      | No  |     |     |     |     |
| DIVPGDIVEVAVGDKVPADIR   | R                        | I    | 95.00%                                                                                                              |                         |                                       |           |                                                                                                                                                                                                                      | 113            |                | 1089.1030 | 2      | 7.7  | 144           | 164      | No  |     |     |     |     |
| DIVPGDIVEVAVGDKVPADIR   | R                        | I    | 95.00%                                                                                                              |                         |                                       |           |                                                                                                                                                                                                                      | 55             |                | 726.4043  | 3      | 7.0  | 144           | 164      | No  |     |     |     |     |
| DQMAATEQDKTPLQKQ        | R                        | L    | 95.00%                                                                                                              |                         |                                       |           |                                                                                                                                                                                                                      | 83             | M3: Oxidation  | 924.4524  | 2      | 8.5  | 237           | 252      | No  |     |     |     |     |
| DQMAATEQDKTPLQKQ        | R                        | L    | 95.00%                                                                                                              |                         |                                       |           |                                                                                                                                                                                                                      | 70             | M3: Oxidation  | 616.6353  | 2      | 4.9  | 237           | 252      | No  |     |     |     |     |
| DTPPKREEMVLDSDAR        | R                        | F    | 95.00%                                                                                                              |                         |                                       |           |                                                                                                                                                                                                                      | 38             | M9: Oxidation  | 937.9523  | 2      | 2.6  | 568           | 583      | No  |     |     |     |     |
| EEMVLDDSDAR             | R                        | F    | 95.00%                                                                                                              | 79                      | M3: Oxidation                         | 590.7643  | 2                                                                                                                                                                                                                    | 4.4            | 574            | 583       | No     |      |               |          |     |     |     |     |     |
| EFDDLPLAEQR             | R                        | E    | 95.00%                                                                                                              | 76                      |                                       | 666.8281  | 2                                                                                                                                                                                                                    | 3.4            | 657            | 667       | No     |      |               |          |     |     |     |     |     |
| EFDDLPLAEQR             | R                        | E    | 95.00%                                                                                                              | 44                      |                                       | 444.8889  | 3                                                                                                                                                                                                                    | 5.4            | 657            | 667       | No     |      |               |          |     |     |     |     |     |
| EFTLEFSR                | K                        | D    | 95.00%                                                                                                              | 42                      |                                       | 1028.5150 | 1                                                                                                                                                                                                                    | 9.6            | 482            | 489       | Yes    |      |               |          |     |     |     |     |     |
| EFTLEFSR                | K                        | D    | 95.00%                                                                                                              | 60                      |                                       | 514.7578  | 2                                                                                                                                                                                                                    | 2.4            | 482            | 489       | Yes    |      |               |          |     |     |     |     |     |
| EPLISGWLFFR             | K                        | Y    | 95.00%                                                                                                              | 63                      |                                       | 682.8785  | 2                                                                                                                                                                                                                    | 9.1            | 826            | 836       | Yes    |      |               |          |     |     |     |     |     |
|                         |                          |      |                                                                                                                     |                         |                                       |           |                                                                                                                                                                                                                      |                |                |           |        |      |               |          |     |     |     |     |     |
| FLEYETDLTFVGVVGMDDPPRK  | R                        | E    | 95.00%                                                                                                              | 39                      | M16: Oxidation                        | 848.1067  | 3                                                                                                                                                                                                                    | 5.6            | 584            | 605       | No     |      |               |          |     |     |     |     |     |
| GAPEGVDR                | K                        | C    | 95.00%                                                                                                              | 58                      |                                       | 457.2430  | 2                                                                                                                                                                                                                    | 4.2            | 516            | 524       | Yes    |      |               |          |     |     |     |     |     |
| HTEPVDPDR               | K                        | A    | 95.00%                                                                                                              | 39                      |                                       | 524.2671  | 2                                                                                                                                                                                                                    | 3.7            | 190            | 198       | No     |      |               |          |     |     |     |     |     |
| IGIFGENEEVADR           | R                        | A    | 95.00%                                                                                                              | 113                     |                                       | 724.8589  | 2                                                                                                                                                                                                                    | 5.4            | 639            | 651       | No     |      |               |          |     |     |     |     |     |
| IMAVIKEWGTGR            | K                        | D    | 95.00%                                                                                                              | 28                      | M2: Oxidation                         | 688.8760  | 2                                                                                                                                                                                                                    | 5.8            | 545            | 556       | No     |      |               |          |     |     |     |     |     |
| IMAVIKEWGTGR            | K                        | D    | 95.00%                                                                                                              | 31                      | M2: Oxidation                         | 459.5858  | 3                                                                                                                                                                                                                    | 4.0            | 545            | 556       | No     |      |               |          |     |     |     |     |     |
| IRDQMAATEQDKTPLQKQ      | K                        | L    | 95.00%                                                                                                              | 61                      | M5: Oxidation                         | 1059.0430 | 2                                                                                                                                                                                                                    | 5.8            | 235            | 252       | No     |      |               |          |     |     |     |     |     |
| IRDQMAATEQDKTPLQKQ      | K                        | L    | 95.00%                                                                                                              | 67                      | M5: Oxidation                         | 706.3637  | 3                                                                                                                                                                                                                    | 4.3            | 235            | 252       | No     |      |               |          |     |     |     |     |     |
| IRDQMAATEQDKTPLQKQ      | K                        | L    | 95.00%                                                                                                              | 41                      | M5: Oxidation                         | 530.0242  | 4                                                                                                                                                                                                                    | 3.3            | 235            | 252       | No     |      |               |          |     |     |     |     |     |
| IRDQMAATEQDKTPLQKQ      | K                        | L    | 95.00%                                                                                                              | 53                      |                                       | 701.0312  | 3                                                                                                                                                                                                                    | 3.0            | 235            | 252       | No     |      |               |          |     |     |     |     |     |
| ISLPVIGLDEILK           | K                        | F    | 95.00%                                                                                                              | 106                     |                                       | 705.4386  | 2                                                                                                                                                                                                                    | 5.1            | 973            | 985       | No     |      |               |          |     |     |     |     |     |
| ISLPVIGLDEILK           | K                        | F    | 95.00%                                                                                                              | 37                      |                                       | 470.6285  | 3                                                                                                                                                                                                                    | 5.5            | 973            | 985       | No     |      |               |          |     |     |     |     |     |
| IVEYLQSYDEITAMTGDGVNDAP |                          |      |                                                                                                                     |                         |                                       |           |                                                                                                                                                                                                                      |                |                |           |        |      |               |          |     |     |     |     |     |
| ALK                     | K                        | K    | 95.00%                                                                                                              | 92                      | M14: Oxidation                        | 943.7975  | 3                                                                                                                                                                                                                    | 9.3            | 687            | 712       | No     |      |               |          |     |     |     |     |     |



|     |                                       |        |                                                                                                        |                          |   |   |        |     |                              |           |   |     |      |      |     |  |  |  |  |
|-----|---------------------------------------|--------|--------------------------------------------------------------------------------------------------------|--------------------------|---|---|--------|-----|------------------------------|-----------|---|-----|------|------|-----|--|--|--|--|
|     |                                       |        |                                                                                                        | IEANEALVK                | R | A | 95.00% | 67  |                              | 493.7823  | 2 | 4.5 | 157  | 165  | No  |  |  |  |  |
|     |                                       |        |                                                                                                        | PGLVVVHAEDGTTSK          | R | Y | 95.00% | 43  |                              | 503.9388  | 3 | 6.2 | 82   | 96   | No  |  |  |  |  |
| 183 | IPI00024983; IPI00410134              | RTN2   | ISOFORM RTN2-A OF RETICULON-2.; ISOFORM RTN2-C OF RETICULON-2.                                         | AKIPGTGALASAAAASVSGSK    | R | A | 95.00% | 133 |                              | 864.4949  | 2 | 9.4 | 522  | 541  | No  |  |  |  |  |
|     |                                       |        |                                                                                                        | AKIPGTGALASAAAASVSGSK    | R | A | 95.00% | 73  |                              | 576.6643  | 3 | 6.7 | 522  | 541  | No  |  |  |  |  |
|     |                                       |        |                                                                                                        | IPGTGALASAAAASVSGSK      | K | A | 95.00% | 119 |                              | 764.9278  | 2 | 9.3 | 524  | 541  | No  |  |  |  |  |
|     |                                       |        |                                                                                                        | IPGTGALASAAAASVSGSK      | K | A | 95.00% | 72  |                              | 510.2858  | 3 | 5.4 | 524  | 541  | No  |  |  |  |  |
|     |                                       |        |                                                                                                        | QHQAQIDQYVGLVLTNQLSHIK   | R | A | 95.00% | 46  |                              | 605.8257  | 4 | 4.4 | 497  | 517  | No  |  |  |  |  |
|     |                                       |        |                                                                                                        | VADLLYWK                 | K | D | 95.00% | 64  |                              | 504.2856  | 2 | 6.7 | 345  | 352  | No  |  |  |  |  |
|     |                                       |        |                                                                                                        | VVSAATQLR                | R | H | 95.00% | 82  |                              | 472.7828  | 2 | 5.1 | 439  | 447  | No  |  |  |  |  |
|     |                                       |        |                                                                                                        |                          |   |   |        |     |                              |           |   |     |      |      |     |  |  |  |  |
| 184 | IPI00024993                           | ECHS1  | ENOYL-COA HYDRATASE, MITOCHONDRIAL PRECURSOR.                                                          | EGMTAFVEK                | K | R | 95.00% | 40  | M3: Oxidation                | 514.2460  | 2 | 6.9 | 274  | 282  | No  |  |  |  |  |
|     |                                       |        |                                                                                                        | ESVNAAFEMTLTEGSK         | K | L | 95.00% | 91  | M9: Oxidation                | 865.4100  | 2 | 9.7 | 242  | 257  | No  |  |  |  |  |
|     |                                       |        |                                                                                                        | KLFYSTFATDDRK            | K | E | 95.00% | 69  |                              | 796.4158  | 2 | 7.4 | 261  | 273  | No  |  |  |  |  |
|     |                                       |        |                                                                                                        | LFYSTFATDDRK             | K | E | 95.00% | 50  |                              | 732.3674  | 2 | 6.8 | 262  | 273  | No  |  |  |  |  |
|     |                                       |        |                                                                                                        | NNTVGLIQLNRPK            | K | A | 95.00% | 67  |                              | 733.9313  | 2 | 7.1 | 44   | 56   | No  |  |  |  |  |
|     |                                       |        |                                                                                                        |                          |   |   |        |     |                              |           |   |     |      |      |     |  |  |  |  |
|     |                                       |        |                                                                                                        |                          |   |   |        |     |                              |           |   |     |      |      |     |  |  |  |  |
|     |                                       |        |                                                                                                        |                          |   |   |        |     |                              |           |   |     |      |      |     |  |  |  |  |
| 185 | IPI00025019                           | PSMB1  | PROTEASOME SUBUNIT BETA TYPE 1 PRECURSOR.                                                              | SLAMEMVLTGDR             | K | I | 95.00% | 68  | M4: Oxidation, M6: Oxidation | 677.8255  | 2 | 6.2 | 186  | 197  | No  |  |  |  |  |
|     |                                       |        |                                                                                                        | DVFISAAER                | K | D | 95.00% | 41  |                              | 504.2642  | 2 | 4.5 | 205  | 213  | No  |  |  |  |  |
|     |                                       |        |                                                                                                        | EGIREETVSLR              | K | K | 95.00% | 43  |                              | 644.8522  | 2 | 8.1 | 229  | 239  | No  |  |  |  |  |
| 186 | IPI00025084; IPI00794720              | CAPNS1 | CALPAIN SMALL SUBUNIT 1.; 34 KDA PROTEIN.                                                              | ILGGVISAISEAAAQYNPEPPPPR | R | T | 95.00% | 72  |                              | 612.5834  | 4 | 6.9 | 61   | 84   | No  |  |  |  |  |
|     |                                       |        |                                                                                                        | LGFEFEK                  | K | Y | 95.00% | 48  |                              | 435.2269  | 2 | 5.8 | 159  | 165  | No  |  |  |  |  |
|     |                                       |        |                                                                                                        | SMVAVMDSDDTTGK           | R | L | 95.00% | 41  | M2: Oxidation, M6: Oxidation | 687.3055  | 2 | 7.6 | 146  | 158  | No  |  |  |  |  |
|     |                                       |        |                                                                                                        | THYSNIEANESEEV           | R | Q | 95.00% | 79  |                              | 889.4095  | 2 | 6.7 | 85   | 99   | No  |  |  |  |  |
|     |                                       |        |                                                                                                        |                          |   |   |        |     |                              |           |   |     |      |      |     |  |  |  |  |
|     |                                       |        |                                                                                                        |                          |   |   |        |     |                              |           |   |     |      |      |     |  |  |  |  |
|     |                                       |        |                                                                                                        |                          |   |   |        |     |                              |           |   |     |      |      |     |  |  |  |  |
|     |                                       |        |                                                                                                        |                          |   |   |        |     |                              |           |   |     |      |      |     |  |  |  |  |
| 187 | IPI00025086                           | COX5A  | CYTOCHROME C OXIDASE SUBUNIT 5A, MITOCHONDRIAL PRECURSOR.                                              | GINTLVTYDMVPEPK          | K | I | 95.00% | 110 | M10: Oxidation               | 846.9358  | 2 | 6.9 | 73   | 87   | No  |  |  |  |  |
|     |                                       |        |                                                                                                        | ILEVVK                   | R | D | 95.00% | 40  |                              | 700.4658  | 1 | 6.8 | 108  | 113  | No  |  |  |  |  |
|     |                                       |        |                                                                                                        | ILEVVKDK                 | R | A | 95.00% | 37  |                              | 472.2969  | 2 | 3.2 | 108  | 115  | No  |  |  |  |  |
|     |                                       |        |                                                                                                        | KGINTLVTYDMVPEPK         | R | I | 95.00% | 44  | M11: Oxidation               | 607.6587  | 3 | 7.2 | 72   | 87   | No  |  |  |  |  |
|     |                                       |        |                                                                                                        | WVTFYFNKPDIDAWELR        | R | K | 95.00% | 42  |                              | 685.0149  | 3 | 5.1 | 56   | 71   | No  |  |  |  |  |
|     |                                       |        |                                                                                                        |                          |   |   |        |     |                              |           |   |     |      |      |     |  |  |  |  |
|     |                                       |        |                                                                                                        |                          |   |   |        |     |                              |           |   |     |      |      |     |  |  |  |  |
|     |                                       |        |                                                                                                        |                          |   |   |        |     |                              |           |   |     |      |      |     |  |  |  |  |
| 188 | IPI00025092; IPI00791650; IPI00797657 | MYBPC1 | MYOSIN-BINDING PROTEIN C, SLOW-TYPE.; 127 KDA PROTEIN.; MYOSIN BINDING PROTEIN C, SLOW TYPE ISOFORM 4. | ADAAEYSVMTTGGQSSAK       | K | L | 95.00% | 139 | M9: Oxidation                | 895.4062  | 2 | 7.3 | 408  | 425  | Yes |  |  |  |  |
|     |                                       |        |                                                                                                        | ADAAEYSVMTTGGQSSAK       | K | L | 95.00% | 71  | M9: Oxidation                | 597.2717  | 3 | 4.5 | 408  | 425  | Yes |  |  |  |  |
|     |                                       |        |                                                                                                        | ADAAEYSVMTTGGQSSAK       | K | L | 95.00% | 123 |                              | 887.4032  | 2 | 1.1 | 408  | 425  | Yes |  |  |  |  |
|     |                                       |        |                                                                                                        | ADAAEYSVMTTGGQSSAK       | K | L | 95.00% | 76  |                              | 591.9394  | 3 | 3.4 | 408  | 425  | Yes |  |  |  |  |
|     |                                       |        |                                                                                                        | AIMEGSGR                 | K | I | 95.00% | 50  | M3: Oxidation                | 418.7039  | 2 | 7.5 | 565  | 572  | Yes |  |  |  |  |
|     |                                       |        |                                                                                                        | AKDNFAGNYR               | K | C | 95.00% | 58  |                              | 578.2838  | 2 | 4.3 | 132  | 141  | Yes |  |  |  |  |
|     |                                       |        |                                                                                                        | AVNAAGASEPK              | K | Y | 95.00% | 63  |                              | 507.7670  | 2 | 4.1 | 812  | 822  | Yes |  |  |  |  |
|     |                                       |        |                                                                                                        | AVNDLGTVEIECK            | K | L | 95.00% | 96  |                              | 695.8511  | 2 | 4.0 | 1121 | 1133 | Yes |  |  |  |  |
|     |                                       |        |                                                                                                        | DDGNAAITGYTIQK           | K | A | 95.00% | 85  |                              | 733.8652  | 2 | 6.5 | 957  | 970  | Yes |  |  |  |  |
|     |                                       |        |                                                                                                        | DDSGVYHINLK              | R | N | 95.00% | 70  |                              | 630.8180  | 2 | 4.6 | 592  | 602  | Yes |  |  |  |  |
|     |                                       |        |                                                                                                        | DGAEIDKNQINIR            | K | N | 95.00% | 97  |                              | 743.3899  | 2 | 3.8 | 876  | 888  | Yes |  |  |  |  |
|     |                                       |        |                                                                                                        | DGAEIDKNQINIR            | K | N | 95.00% | 69  |                              | 495.9286  | 3 | 2.5 | 876  | 888  | Yes |  |  |  |  |
|     |                                       |        |                                                                                                        | DNFAGNYR                 | K | C | 95.00% | 39  |                              | 956.4313  | 1 | 9.2 | 134  | 141  | Yes |  |  |  |  |
|     |                                       |        |                                                                                                        | DNFAGNYR                 | K | C | 95.00% | 41  |                              | 478.7162  | 2 | 2.2 | 134  | 141  | Yes |  |  |  |  |
|     |                                       |        |                                                                                                        | DWTLVETPPGEEQAK          | K | Q | 95.00% | 71  |                              | 850.4198  | 2 | 8.0 | 35   | 49   | No  |  |  |  |  |
|     |                                       |        |                                                                                                        | EAGTTPAKDWTLVETPPGEEQA   |   |   |        |     |                              |           |   |     |      |      |     |  |  |  |  |
|     |                                       |        |                                                                                                        | K                        | K | Q | 95.00% | 48  |                              | 819.0774  | 3 | 7.0 | 27   | 49   | No  |  |  |  |  |
|     |                                       |        |                                                                                                        | EENEVPAPAPPPPEEPSKEK     | K | E | 95.00% | 56  |                              | 1037.5070 | 2 | 3.4 | 8    | 26   | Yes |  |  |  |  |
|     |                                       |        |                                                                                                        | EIIIEPPK                 | K | I | 95.00% | 43  |                              | 825.4747  | 1 | 2.8 | 832  | 838  | Yes |  |  |  |  |
|     |                                       |        |                                                                                                        | EIIIEPPKIR               | K | I | 95.00% | 26  |                              | 547.8343  | 2 | 3.0 | 832  | 840  | Yes |  |  |  |  |
|     |                                       |        |                                                                                                        | EPPIMVTK                 | R | Q | 95.00% | 47  | M5: Oxidation                | 465.7539  | 2 | 3.1 | 339  | 346  | Yes |  |  |  |  |
|     |                                       |        |                                                                                                        | EPPIMVTK                 | R | Q | 95.00% | 34  |                              | 457.7560  | 2 | 2.0 | 339  | 346  | Yes |  |  |  |  |
|     |                                       |        |                                                                                                        | EVKQEEEEPQVDVWELLK       | R | N | 95.00% | 33  |                              | 742.7187  | 3 | 4.9 | 198  | 215  | Yes |  |  |  |  |
|     |                                       |        |                                                                                                        | FTITGLPTDAK              | K | I | 95.00% | 27  |                              | 1163.6410 | 1 | 8.1 | 795  | 805  | Yes |  |  |  |  |
|     |                                       |        |                                                                                                        | FTITGLPTDAK              | K | I | 95.00% | 67  |                              | 582.3214  | 2 | 3.0 | 795  | 805  | Yes |  |  |  |  |
|     |                                       |        |                                                                                                        | FVETASIDIQIDRPGPPQIVK    | K | I | 95.00% | 65  |                              | 812.7964  | 3 | 9.4 | 918  | 939  | Yes |  |  |  |  |
|     |                                       |        |                                                                                                        | FVVELADPK                | R | L | 95.00% | 68  |                              | 509.2860  | 2 | 1.9 | 272  | 280  | Yes |  |  |  |  |
|     |                                       |        |                                                                                                        | FVVELADPKLEVK            | R | W | 95.00% | 71  |                              | 743.9330  | 2 | 3.9 | 272  | 284  | Yes |  |  |  |  |
|     |                                       |        |                                                                                                        | FVVELADPKLEVK            | R | W | 95.00% | 66  |                              | 496.2915  | 3 | 4.4 | 272  | 284  | Yes |  |  |  |  |
|     |                                       |        |                                                                                                        | GKWMDLASK                | K | A | 95.00% | 34  | M4: Oxidation                | 526.2684  | 2 | 3.9 | 97   | 105  | Yes |  |  |  |  |
|     |                                       |        |                                                                                                        | HILLIEGATK               | K | A | 95.00% | 54  |                              | 1094.6640 | 1 | 5.8 | 398  | 407  | Yes |  |  |  |  |
|     |                                       |        |                                                                                                        | HILLIEGATK               | K | A | 95.00% | 66  |                              | 547.8336  | 2 | 1.6 | 398  | 407  | Yes |  |  |  |  |
|     |                                       |        |                                                                                                        | IAFYQGITDLR              | K | G | 95.00% | 78  |                              | 648.8547  | 2 | 4.7 | 225  | 235  | Yes |  |  |  |  |
|     |                                       |        |                                                                                                        | IEDVWGENVALTWTPPK        | K | D | 95.00% | 112 |                              | 978.0048  | 2 | 5.1 | 940  | 956  | Yes |  |  |  |  |

|                          |   |   |        |     |                                  |           |   |      |      |      |     |  |  |  |
|--------------------------|---|---|--------|-----|----------------------------------|-----------|---|------|------|------|-----|--|--|--|
| IEDVWGENVALTWTPPKDDGNA   |   |   |        |     |                                  |           |   |      |      |      |     |  |  |  |
| AITGYTIQK                | K | A | 95.00% | 56  |                                  | 1134.9090 | 3 | 7.6  | 940  | 970  | Yes |  |  |  |
| IFAVNAIGISK              | R | P | 95.00% | 48  |                                  | 1132.6820 | 1 | 8.1  | 694  | 704  | Yes |  |  |  |
| IFAVNAIGISK              | R | P | 95.00% | 112 |                                  | 566.8414  | 2 | 1.6  | 694  | 704  | Yes |  |  |  |
| IFAVNAIGISKPSMPSR        | R | P | 95.00% | 56  | M14: Oxidation                   | 902.5020  | 2 | 9.4  | 694  | 710  | Yes |  |  |  |
| IFAVNAIGISKPSMPSR        | R | P | 95.00% | 75  | M14: Oxidation                   | 602.0012  | 3 | 4.9  | 694  | 710  | Yes |  |  |  |
| IFAVNAIGISKPSMPSR        | R | P | 95.00% | 41  |                                  | 596.6678  | 3 | 2.0  | 694  | 710  | Yes |  |  |  |
| IILDGLDADNTVTVIAGNK      | K | L | 95.00% | 162 |                                  | 971.5355  | 2 | 6.8  | 524  | 542  | Yes |  |  |  |
| IILDGLDADNTVTVIAGNK      | K | L | 95.00% | 73  |                                  | 648.0248  | 3 | 4.7  | 524  | 542  | Yes |  |  |  |
| ILDPAVQVVK               | K | G | 95.00% | 37  |                                  | 1161.6200 | 1 | 3.4  | 257  | 266  | Yes |  |  |  |
| ILDPAVQVVK               | K | G | 95.00% | 87  |                                  | 581.3116  | 2 | -0.4 | 257  | 266  | Yes |  |  |  |
| ILDPAVQVVKGGR            | K | V | 95.00% | 47  |                                  | 716.3871  | 2 | 4.6  | 257  | 269  | Yes |  |  |  |
| ILTPLTDQTVNLGK           | K | E | 95.00% | 96  |                                  | 756.9391  | 2 | 4.3  | 435  | 448  | Yes |  |  |  |
| ILTPLTDQTVNLGK           | K | E | 95.00% | 47  |                                  | 504.9620  | 3 | 4.2  | 435  | 448  | Yes |  |  |  |
| IRTESYPDSSTLVIDIAER      | R | D | 95.00% | 57  |                                  | 722.3801  | 3 | 7.1  | 573  | 591  | Yes |  |  |  |
| IRTESYPDSSTLVIDIAERDDSGV |   |   |        |     |                                  |           |   |      |      |      |     |  |  |  |
| YHINKL                   | R | N | 95.00% | 78  |                                  | 852.4421  | 4 | 9.4  | 573  | 602  | Yes |  |  |  |
| KDGAIEDKNQINIR           | K | N | 95.00% | 107 |                                  | 807.4402  | 2 | 7.0  | 857  | 870  | Yes |  |  |  |
| KDGAIEDKNQINIR           | K | N | 95.00% | 57  |                                  | 538.6268  | 3 | 2.1  | 875  | 888  | Yes |  |  |  |
| KDGAIEDKNQINIR           | K | N | 95.00% | 33  |                                  | 404.2223  | 4 | 2.9  | 875  | 888  | Yes |  |  |  |
| KEENEVPAPAPPPPEPSK       | K | E | 95.00% | 89  |                                  | 972.9900  | 2 | 8.3  | 7    | 24   | Yes |  |  |  |
| KEENEVPAPAPPPPEPSK       | K | E | 95.00% | 47  |                                  | 1101.5590 | 2 | 7.8  | 7    | 26   | Yes |  |  |  |
| KEENEVPAPAPPPPEPSK       | K | E | 95.00% | 57  |                                  | 734.7073  | 3 | 5.9  | 7    | 26   | Yes |  |  |  |
| KHILIIEGATK              | K | A | 95.00% | 53  |                                  | 611.8817  | 2 | 2.5  | 397  | 407  | Yes |  |  |  |
| KHILIIEGATK              | K | A | 95.00% | 59  |                                  | 408.2568  | 3 | 1.8  | 397  | 407  | Yes |  |  |  |
| KMIEGVAYEVR              | K | I | 95.00% | 74  | M2: Oxidation                    | 655.8452  | 2 | 3.6  | 683  | 693  | Yes |  |  |  |
| KMIEGVAYEVR              | K | I | 95.00% | 42  | M2: Oxidation                    | 437.5661  | 3 | 3.6  | 683  | 693  | Yes |  |  |  |
| KMIEGVAYEVR              | K | I | 95.00% | 90  |                                  | 647.8469  | 2 | 2.3  | 683  | 693  | Yes |  |  |  |
| KMIEGVAYEVR              | K | I | 95.00% | 50  |                                  | 432.2339  | 3 | 2.5  | 683  | 693  | Yes |  |  |  |
| LEIPISGEPPPP             | R | A | 95.00% | 64  |                                  | 638.8652  | 2 | 5.5  | 545  | 556  | Yes |  |  |  |
| LEIPISGEPPPP             | R | A | 95.00% | 42  |                                  | 426.2447  | 3 | 2.3  | 545  | 556  | Yes |  |  |  |
| LRLEIPISGEPPPP           | K | A | 95.00% | 66  |                                  | 773.4575  | 2 | 4.1  | 543  | 556  | Yes |  |  |  |
| LRLEIPISGEPPPP           | K | A | 95.00% | 64  |                                  | 515.9741  | 3 | 3.7  | 543  | 556  | Yes |  |  |  |
| LSVDLKPLK                | K | I | 95.00% | 41  |                                  | 1012.6450 | 1 | 3.6  | 426  | 434  | Yes |  |  |  |
| LSVDLKPLK                | K | I | 95.00% | 64  |                                  | 506.8260  | 2 | 3.1  | 426  | 434  | Yes |  |  |  |
| LVIANALTEDEGDYVFAPDAYNV  |   |   |        |     |                                  |           |   |      |      |      |     |  |  |  |
| TLPVK                    | K | V | 95.00% | 49  |                                  | 1003.8520 | 3 | 10.0 | 488  | 515  | Yes |  |  |  |
| LVIANALTEDEGDYVFAPDAYNV  |   |   |        |     |                                  |           |   |      |      |      |     |  |  |  |
| TLPVK                    | K | V | 95.00% | 55  |                                  | 753.1393  | 4 | 8.0  | 488  | 515  | Yes |  |  |  |
| MFSNQGVCTLEIR            | R | K | 95.00% | 43  | M1: Oxidation                    | 757.3683  | 2 | 9.5  | 1095 | 1107 | Yes |  |  |  |
| MIEGVAYEVR               | K | I | 95.00% | 39  | M1: Oxidation                    | 1182.5940 | 1 | 9.2  | 684  | 693  | Yes |  |  |  |
| MIEGVAYEVR               | K | I | 95.00% | 78  | M1: Oxidation                    | 591.7964  | 2 | 1.7  | 684  | 693  | Yes |  |  |  |
| MIEGVAYEVR               | K | I | 95.00% | 71  |                                  | 583.7996  | 2 | 2.7  | 684  | 693  | Yes |  |  |  |
| NEAGEAHASIK              | K | V | 95.00% | 61  |                                  | 563.7816  | 2 | 5.4  | 603  | 613  | Yes |  |  |  |
| NGEEIIPGPK               | K | S | 95.00% | 57  |                                  | 1053.5640 | 1 | 5.0  | 377  | 386  | Yes |  |  |  |
| NGEEIIPGPK               | K | S | 95.00% | 58  |                                  | 527.2845  | 2 | 2.8  | 377  | 386  | Yes |  |  |  |
| NGLPVQESDR               | K | L | 95.00% | 53  |                                  | 557.7797  | 2 | 2.1  | 467  | 476  | Yes |  |  |  |
| NGLPVQESDRLK             | K | V | 95.00% | 42  |                                  | 678.3714  | 2 | 4.9  | 467  | 478  | Yes |  |  |  |
| NSETDTIIFIR              | R | K | 95.00% | 79  |                                  | 654.8476  | 2 | 5.6  | 889  | 899  | Yes |  |  |  |
| NSETDTIIFIR              | R | K | 95.00% | 35  |                                  | 436.9025  | 3 | 9.0  | 889  | 899  | Yes |  |  |  |
| PFVPLAVTSPPTLLTVDSVDTT   |   |   |        |     |                                  |           |   |      |      |      |     |  |  |  |
| VTMR                     | R | W | 95.00% | 61  | M26: Oxidation                   | 958.8519  | 3 | 7.9  | 711  | 737  | Yes |  |  |  |
| PRPELTWK                 | K | K | 95.00% | 32  |                                  | 513.7922  | 2 | 2.6  | 867  | 874  | Yes |  |  |  |
| PSMPSRPFVPLAVTSPPTLLTV   |   |   |        |     |                                  |           |   |      |      |      |     |  |  |  |
| SVTDTTVTMR               | K | W | 95.00% | 97  | M3: Oxidation,<br>M32: Oxidation | 1182.6250 | 3 | 9.8  | 705  | 737  | Yes |  |  |  |
| PSMPSRPFVPLAVTSPPTLLTV   |   |   |        |     |                                  |           |   |      |      |      |     |  |  |  |
| SVTDTTVTMR               | K | W | 95.00% | 58  | M3: Oxidation,<br>M32: Oxidation | 887.2193  | 4 | 8.5  | 705  | 737  | Yes |  |  |  |
| QNANSQSLSILFIEKPQGGTVK   | K | V | 95.00% | 92  |                                  | 1136.6270 | 2 | 7.4  | 50   | 70   | Yes |  |  |  |
| QNANSQSLSILFIEKPQGGTVK   | K | V | 95.00% | 77  |                                  | 758.0852  | 3 | 4.3  | 50   | 70   | Yes |  |  |  |
| QQUEEPQVDVWELLK          | K | N | 95.00% | 90  |                                  | 935.4717  | 2 | 6.4  | 201  | 215  | Yes |  |  |  |
| QQUEEPQVDVWELLK          | K | N | 95.00% | 57  |                                  | 623.9840  | 3 | 6.8  | 201  | 215  | Yes |  |  |  |
| RSGEQEDAGELDFSGLLK       | K | R | 95.00% | 115 |                                  | 1004.4930 | 2 | 7.6  | 177  | 195  | Yes |  |  |  |
| RSGEQEDAGELDFSGLLK       | K | R | 95.00% | 80  |                                  | 669.9971  | 3 | 6.6  | 177  | 195  | Yes |  |  |  |
| RVGEAVNLVFPQVK           | R | P | 95.00% | 63  |                                  | 813.9752  | 2 | 5.6  | 852  | 866  | Yes |  |  |  |
| RVGEAVNLVFPQVK           | R | P | 95.00% | 42  |                                  | 542.9863  | 3 | 6.0  | 852  | 866  | Yes |  |  |  |
| RVGEAVNLVFPQVKPR         | R | P | 95.00% | 50  |                                  | 627.3699  | 3 | 3.6  | 852  | 868  | Yes |  |  |  |
| RVGEAVNLVFPQVKPR         | R | P | 95.00% | 33  |                                  | 470.7787  | 4 | 2.3  | 852  | 868  | Yes |  |  |  |
| SGEQEDAGELDFSGLLK        | R | R | 95.00% | 133 |                                  | 926.4421  | 2 | 8.0  | 178  | 195  | Yes |  |  |  |
| SGEQEDAGELDFSGLLK        | R | R | 95.00% | 95  |                                  | 617.9633  | 3 | 6.9  | 178  | 195  | Yes |  |  |  |
| SGEQEDAGELDFSGLLKR       | R | R | 95.00% | 81  |                                  | 1004.4940 | 2 | 8.9  | 178  | 196  | Yes |  |  |  |

NADH DEHYDROGENASE [UBIQUINONE] IRON-  
SULFUR PROTEIN 2,  
MITOCHONDRIALPRECURSOR.

|                            |   |   |        |     |                               |           |   |     |      |      |     |
|----------------------------|---|---|--------|-----|-------------------------------|-----------|---|-----|------|------|-----|
| SGEGQEDAGELDFSGLLKR        | R | R | 95.00% | 73  |                               | 669.9985  | 3 | 8.7 | 178  | 196  | Yes |
| SHSGKYDLQVK                | R | V | 95.00% | 37  |                               | 631.3340  | 2 | 4.8 | 904  | 914  | Yes |
| SMEWFTVIEHYHR              | K | T | 95.00% | 78  | M2: Oxidation                 | 875.9104  | 2 | 6.9 | 975  | 987  | Yes |
| SMEWFTVIEHYHR              | K | T | 95.00% | 50  | M2: Oxidation                 | 584.2774  | 3 | 9.0 | 975  | 987  | Yes |
| SMEWFTVIEHYHR              | K | T | 95.00% | 68  |                               | 867.9137  | 2 | 7.8 | 975  | 987  | Yes |
| SMEWFTVIEHYHR              | K | T | 95.00% | 45  |                               | 578.9436  | 3 | 5.3 | 975  | 987  | Yes |
| TESYPDSSTLVIDIAER          | R | D | 95.00% | 120 |                               | 948.4720  | 2 | 6.4 | 975  | 591  | Yes |
| TESYPDSSTLVIDIAERDDSGVY    |   |   |        |     |                               |           |   |     |      |      |     |
| HINLK                      | R | N | 95.00% | 72  |                               | 1046.5220 | 3 | 7.5 | 575  | 602  | Yes |
| TESYPDSSTLVIDIAERDDSGVY    |   |   |        |     |                               |           |   |     |      |      |     |
| HINLK                      | R | N | 95.00% | 54  |                               | 785.1423  | 4 | 5.8 | 575  | 602  | Yes |
| TKFTITGLPTDAK              | K | I | 95.00% | 81  |                               | 696.8935  | 2 | 3.6 | 793  | 805  | Yes |
| TKFTITGLPTDAK              | K | I | 95.00% | 41  |                               | 464.9308  | 3 | 1.8 | 793  | 805  | Yes |
| TSATITELVIGNEYFR           | R | V | 95.00% | 111 |                               | 989.0104  | 2 | 8.2 | 988  | 1004 | Yes |
| TSATITELVIGNEYFR           | R | V | 95.00% | 94  |                               | 659.6745  | 3 | 5.6 | 988  | 1004 | Yes |
| VAIVDDPR                   | K | Y | 95.00% | 55  |                               | 442.7470  | 2 | 2.1 | 1085 | 1092 | Yes |
| VDKFVETASIDIQIDRPGPPQIVK   | K | I | 95.00% | 51  |                               | 926.8603  | 3 | 8.8 | 915  | 939  | Yes |
| VDKFVETASIDIQIDRPGPPQIVK   | K | I | 95.00% | 89  |                               | 695.3967  | 4 | 8.1 | 915  | 939  | Yes |
| VGEAVNLVIPFQ GK            | R | P | 95.00% | 91  |                               | 735.9244  | 2 | 6.0 | 853  | 866  | Yes |
| VGEAVNLVIPFQ GK            | R | P | 95.00% | 29  |                               | 490.9518  | 3 | 5.1 | 853  | 866  | Yes |
| VGEAVNLVIPFQ GKPR          | R | P | 95.00% | 39  |                               | 862.5040  | 2 | 8.2 | 853  | 868  | Yes |
| VGEAVNLVIPFQ GKPR          | R | P | 95.00% | 50  |                               | 575.3367  | 3 | 5.0 | 853  | 868  | Yes |
| VGEAVNLVIPFQ GKRP ELTWK    | R | K | 95.00% | 43  |                               | 826.8074  | 3 | 7.7 | 853  | 874  | Yes |
| VGEDITFIAK                 | K | V | 95.00% | 44  |                               | 1092.6030 | 1 | 7.6 | 71   | 80   | Yes |
| VGEDITFIAK                 | K | V | 95.00% | 89  |                               | 546.8023  | 2 | 2.2 | 71   | 80   | Yes |
| VHVIDPPK                   | K | I | 95.00% | 34  |                               | 452.7675  | 2 | 1.6 | 516  | 523  | Yes |
| VHVIDPPK IILDGLDADNTVT VIA |   |   |        |     |                               |           |   |     |      |      |     |
| GNK                        | K | L | 95.00% | 67  |                               | 943.1994  | 3 | 9.0 | 516  | 542  | Yes |
| VHVIDPPK IILDGLDADNTVT VIA |   |   |        |     |                               |           |   |     |      |      |     |
| GNK                        | K | L | 95.00% | 44  |                               | 707.6511  | 4 | 8.4 | 516  | 542  | Yes |
| VKAEDLLR                   | K | K | 95.00% | 32  |                               | 943.5627  | 1 | 5.2 | 81   | 88   | Yes |
| VKAEDLLR                   | K | K | 95.00% | 47  |                               | 472.2841  | 2 | 2.7 | 81   | 88   | Yes |
| VKAVNAAGASEPK              | R | Y | 95.00% | 42  |                               | 621.3520  | 2 | 8.8 | 810  | 822  | Yes |
| VKAVNAAGASEPK              | R | Y | 95.00% | 30  |                               | 414.5682  | 3 | 2.9 | 810  | 822  | Yes |
| VYTFEMQIIK                 | R | A | 95.00% | 59  | M6: Oxidation                 | 644.3419  | 2 | 7.8 | 122  | 131  | Yes |
| VYTFEMQIIK                 | R | A | 95.00% | 52  |                               | 636.3411  | 2 | 2.6 | 122  | 131  | Yes |
| WMDLASK                    | K | A | 95.00% | 31  | M2: Oxidation                 | 866.4106  | 1 | 2.6 | 99   | 105  | Yes |
| WMDLASK                    | K | A | 95.00% | 35  | M2: Oxidation                 | 433.7089  | 2 | 2.0 | 99   | 105  | Yes |
| YYSQPILVK                  | K | E | 95.00% | 64  |                               | 555.8160  | 2 | 3.7 | 823  | 831  | Yes |
| APGFAHLA GLDK              | K | M | 95.00% | 55  |                               | 598.8285  | 2 | 5.1 | 426  | 437  | No  |
| GEFGVYLVSDGSSR             | K | P | 95.00% | 97  |                               | 736.8599  | 2 | 6.7 | 405  | 418  | No  |
| GEFGVYLVSDGSSRPYR          | K | C | 95.00% | 35  |                               | 944.9672  | 2 | 3.8 | 405  | 421  | No  |
| GHMLADVVAIGTQDIVG EVDR     | K | - | 95.00% | 70  | M3: Oxidation                 | 824.4317  | 3 | 7.7 | 441  | 463  | No  |
| IKAPGFAHLA GLDK            | K | M | 95.00% | 49  |                               | 719.4167  | 2 | 2.5 | 424  | 437  | No  |
| IKAPGFAHLA GLDK            | K | M | 95.00% | 59  |                               | 479.9471  | 3 | 2.5 | 424  | 437  | No  |
| LDELEELLTNNR               | R | I | 95.00% | 73  |                               | 729.8817  | 2 | 7.9 | 255  | 266  | No  |
| LDELEELLTNNR               | R | I | 95.00% | 35  |                               | 486.9219  | 3 | 4.0 | 255  | 266  | No  |
| LLNIRPPR                   | K | A | 95.00% | 22  |                               | 538.3418  | 2 | 1.5 | 158  | 166  | No  |
| LVMELSGEMVR                | R | K | 95.00% | 69  | M3: Oxidation, M9: Oxidation  | 648.3224  | 2 | 2.4 | 97   | 107  | No  |
| LVMELSGEMVR                | R | K | 95.00% | 40  | M9: Oxidation                 | 640.3252  | 2 | 2.8 | 97   | 107  | No  |
| LYTEGYQVPPGATYTAIEAPK      | K | G | 95.00% | 62  |                               | 1135.0820 | 2 | 7.1 | 384  | 404  | No  |
| MHAAYIRPGGVHQDLPLGLMDD     |   |   |        |     |                               |           |   |     |      |      |     |
| IYQFSK                     | R | N | 95.00% | 49  | M1: Oxidation, M20: Oxidation | 801.9029  | 4 | 8.4 | 222  | 249  | No  |
| NITLNFQPQHAAHGVL R         | K | L | 95.00% | 80  |                               | 971.5327  | 2 | 8.4 | 79   | 96   | No  |
| NITLNFQPQHAAHGVL R         | K | L | 95.00% | 36  |                               | 648.0224  | 3 | 5.3 | 79   | 96   | No  |
| TIDIGVVTAEALNYGFSGVMLR     | R | G | 95.00% | 58  | M21: Oxidation                | 824.4296  | 3 | 9.8 | 272  | 294  | No  |
| TOPYDVYDQVEFDVPVGS R       | K | G | 95.00% | 117 |                               | 1107.5280 | 2 | 5.8 | 305  | 323  | No  |
| TOPYDVYDQVEFDVPVGS R       | K | G | 95.00% | 69  |                               | 738.6876  | 3 | 5.3 | 305  | 323  | No  |
| TSMESLIHFK                 | K | L | 95.00% | 37  | M3: Oxidation                 | 673.3345  | 2 | 2.8 | 373  | 383  | No  |
| TYLQALPYFDR                | K | L | 95.00% | 61  |                               | 693.8635  | 2 | 9.6 | 128  | 138  | No  |
| VLFGEITR                   | R | L | 95.00% | 46  |                               | 467.7734  | 2 | 2.9 | 172  | 179  | No  |

|                         |                          |       |                                                               |                          |           |                                                      |        |     |           |                                   |     |     |     |    |  |  |  |
|-------------------------|--------------------------|-------|---------------------------------------------------------------|--------------------------|-----------|------------------------------------------------------|--------|-----|-----------|-----------------------------------|-----|-----|-----|----|--|--|--|
| 190                     | IPI00025252; IPI00657680 | PDIA3 | PROTEIN DISULFIDE-ISOMERASE A3<br>PRECURSOR.; 55 KDA PROTEIN. | EATNPPVIQEEKPK           | R         | K                                                    | 95.00% | 77  | 790.4229  | 2                                 | 2.9 | 483 | 496 | No |  |  |  |
|                         |                          |       |                                                               | ELSDFISYLQR              | R         | E                                                    | 95.00% | 57  | 685.8551  | 2                                 | 4.9 | 472 | 482 | No |  |  |  |
|                         |                          |       |                                                               | FAHTNVESLVNEYDDNGEGIIIF  | R         | P                                                    | 95.00% | 38  | 918.1168  | 3                                 | 4.9 | 184 | 207 | No |  |  |  |
|                         |                          |       |                                                               | FLQDYFDGNLKR             | R         | Y                                                    | 95.00% | 56  | 758.3887  | 2                                 | 6.4 | 352 | 363 | No |  |  |  |
|                         |                          |       |                                                               | GFPTIYFSPANK             | R         | K                                                    | 95.00% | 49  | 671.3492  | 2                                 | 4.6 | 449 | 460 | No |  |  |  |
|                         |                          |       |                                                               | LAPEYEAATR               | R         | L                                                    | 95.00% | 36  | 596.3066  | 2                                 | 3.7 | 63  | 73  | No |  |  |  |
|                         |                          |       |                                                               | MDATANDVPSPYEVR          | K         | G                                                    | 95.00% | 86  | 840.8831  | 2                                 | 2.6 | 434 | 448 | No |  |  |  |
|                         |                          |       |                                                               |                          |           |                                                      |        |     |           | M1: Oxidation                     |     |     |     |    |  |  |  |
|                         |                          |       |                                                               | TFSHELSDFGLESTAGEIPVVAIR | K         | T                                                    | 95.00% | 43  | 859.1128  | 3                                 | 7.1 | 306 | 329 | No |  |  |  |
|                         |                          |       |                                                               | VVVAENFDEIVNNENK         | K         | D                                                    | 95.00% | 84  | 916.9622  | 2                                 | 7.5 | 380 | 395 | No |  |  |  |
|                         |                          |       |                                                               | YGVSGYPTLK               | K         | I                                                    | 95.00% | 39  | 542.7900  | 2                                 | 3.8 | 95  | 104 | No |  |  |  |
|                         |                          |       |                                                               |                          |           |                                                      |        |     |           | M10: Oxidation,<br>M21: Oxidation |     |     |     |    |  |  |  |
|                         |                          |       |                                                               | AALPSHVVTMLDNFPTNLHPMS   | R         | A                                                    | 95.00% | 43  | 1046.7780 | 4                                 | 7.6 | 145 | 183 | No |  |  |  |
|                         |                          |       |                                                               | ALGFPLER                 | R         | P                                                    | 95.00% | 34  | 451.7602  | 2                                 | 2.8 | 441 | 448 | No |  |  |  |
|                         |                          |       |                                                               | ALGFPLERP                | R         | S                                                    | 95.00% | 40  | 564.3351  | 2                                 | 4.0 | 441 | 450 | No |  |  |  |
| ALGVLAQLIWSR            | R                        | A     | 95.00%                                                        | 78                       | 663.9038  | 2                                                    | 7.5    | 429 | 440       | No                                |     |     |     |    |  |  |  |
| DILADLPK                | K                        | E     | 95.00%                                                        | 39                       | 997.6019  | 1                                                    | 8.3    | 35  | 43        | No                                |     |     |     |    |  |  |  |
| DILADLPK                | K                        | E     | 95.00%                                                        | 65                       | 499.3032  | 2                                                    | 4.9    | 35  | 43        | No                                |     |     |     |    |  |  |  |
| DYIWNTLNSGR             | R                        | V     | 95.00%                                                        | 59                       | 669.8296  | 2                                                    | 5.2    | 330 | 340       | No                                |     |     |     |    |  |  |  |
| GLVYETSVLDPDEGIR        | K                        | F     | 95.00%                                                        | 90                       | 881.9537  | 2                                                    | 7.3    | 77  | 92        | No                                |     |     |     |    |  |  |  |
| GLVYETSVLDPDEGIR        | K                        | F     | 95.00%                                                        | 59                       | 588.3045  | 3                                                    | 6.4    | 77  | 92        | No                                |     |     |     |    |  |  |  |
| IVPNVLEQ GK             | K                        | A     | 95.00%                                                        | 43                       | 1209.7280 | 1                                                    | 6.3    | 383 | 393       | No                                |     |     |     |    |  |  |  |
| IVPNVLEQ GK             | K                        | A     | 95.00%                                                        | 88                       | 605.3660  | 2                                                    | 2.6    | 383 | 393       | No                                |     |     |     |    |  |  |  |
| LRDYIWNTLNSGR           | K                        | V     | 95.00%                                                        | 83                       | 804.4239  | 2                                                    | 6.5    | 328 | 340       | No                                |     |     |     |    |  |  |  |
| LRDYIWNTLNSGR           | K                        | V     | 95.00%                                                        | 35                       | 536.6179  | 3                                                    | 5.2    | 328 | 340       | No                                |     |     |     |    |  |  |  |
| LVAQLYK                 | K                        | I     | 95.00%                                                        | 28                       | 834.5168  | 1                                                    | 9.4    | 376 | 382       | No                                |     |     |     |    |  |  |  |
| LVAQLYK                 | K                        | I     | 95.00%                                                        | 32                       | 417.7594  | 2                                                    | 2.5    | 376 | 382       | No                                |     |     |     |    |  |  |  |
|                         |                          |       |                                                               |                          |           | M2: Oxidation, M8:<br>Oxidation                      |        |     |           |                                   |     |     |     |    |  |  |  |
| SMSTEGLMK               | K                        | F     | 95.00%                                                        | 43                       | 508.2304  | 2                                                    | 8.8    | 451 | 459       | No                                |     |     |     |    |  |  |  |
| TKYWELIYEDSMDLIAK       | R                        | L     | 95.00%                                                        | 48                       | 712.0246  | 3                                                    | 7.6    | 192 | 208       | No                                |     |     |     |    |  |  |  |
| TKYWELIYEDSMDLIAK       | R                        | L     | 95.00%                                                        | 51                       | 706.6943  | 3                                                    | 9.5    | 192 | 208       | No                                |     |     |     |    |  |  |  |
|                         |                          |       |                                                               |                          |           | M10: Oxidation,<br>M11: Oxidation,<br>M15: Oxidation |        |     |           |                                   |     |     |     |    |  |  |  |
| TVVGQITVDMMYGGMR        | K                        | G     | 95.00%                                                        | 105                      | 903.4210  | 2                                                    | 5.8    | 58  | 73        | No                                |     |     |     |    |  |  |  |
|                         |                          |       |                                                               |                          |           | M10: Oxidation,<br>M11: Oxidation,<br>M15: Oxidation |        |     |           |                                   |     |     |     |    |  |  |  |
| TVVGQITVDMMYGGMR        | K                        | G     | 95.00%                                                        | 39                       | 602.6150  | 3                                                    | 3.2    | 58  | 73        | No                                |     |     |     |    |  |  |  |
|                         |                          |       |                                                               |                          |           | M15: Oxidation                                       |        |     |           |                                   |     |     |     |    |  |  |  |
| TVVGQITVDMMYGGMR        | K                        | G     | 95.00%                                                        | 36                       | 895.4249  | 2                                                    | 7.4    | 58  | 73        | No                                |     |     |     |    |  |  |  |
| VVPGYGHAVLR             | R                        | K     | 95.00%                                                        | 55                       | 584.3379  | 2                                                    | 3.6    | 341 | 351       | No                                |     |     |     |    |  |  |  |
| AQLGGPEAAK              | R                        | S     | 95.00%                                                        | 53                       | 471.2601  | 2                                                    | 6.9    | 189 | 198       | No                                |     |     |     |    |  |  |  |
| AQLGGPEAAKSDETAAK       | R                        | -     | 95.00%                                                        | 86                       | 822.4216  | 2                                                    | 6.8    | 189 | 205       | No                                |     |     |     |    |  |  |  |
| DGVVEITGK               | K                        | H     | 95.00%                                                        | 52                       | 917.5012  | 1                                                    | 7.4    | 115 | 123       | No                                |     |     |     |    |  |  |  |
| DGVVEITGK               | K                        | H     | 95.00%                                                        | 48                       | 459.2532  | 2                                                    | 4.5    | 115 | 123       | No                                |     |     |     |    |  |  |  |
| DGVVEITGKHEER           | K                        | Q     | 95.00%                                                        | 69                       | 734.8806  | 2                                                    | 9.4    | 115 | 127       | No                                |     |     |     |    |  |  |  |
| DWYPHSR                 | R                        | L     | 95.00%                                                        | 32                       | 480.7235  | 2                                                    | 6.6    | 21  | 27        | No                                |     |     |     |    |  |  |  |
| GPSWDPPFR               | R                        | D     | 95.00%                                                        | 38                       | 481.2330  | 2                                                    | 5.1    | 13  | 20        | No                                |     |     |     |    |  |  |  |
| GPSWDPPFRDWYPHSR        | R                        | L     | 95.00%                                                        | 37                       | 634.9659  | 3                                                    | 7.4    | 13  | 27        | No                                |     |     |     |    |  |  |  |
| KYTLPPGVDPQTQVSSLSPEGTL |                          |       |                                                               |                          |           |                                                      |        |     |           |                                   |     |     |     |    |  |  |  |
| TVEAPMPK                | R                        | L     | 95.00%                                                        | 62                       | 1081.5640 | 3                                                    | 7.6    | 141 | 171       | No                                |     |     |     |    |  |  |  |
| KYTLPPGVDPQTQVSSLSPEGTL |                          |       |                                                               |                          |           |                                                      |        |     |           |                                   |     |     |     |    |  |  |  |
| TVEAPMPK                | R                        | L     | 95.00%                                                        | 27                       | 811.4248  | 4                                                    | 7.8    | 141 | 171       | No                                |     |     |     |    |  |  |  |
| KYTLPPGVDPQTQVSSLSPEGTL |                          |       |                                                               |                          |           |                                                      |        |     |           |                                   |     |     |     |    |  |  |  |
| TVEAPMPK                | R                        | L     | 95.00%                                                        | 90                       | 1076.2330 | 3                                                    | 8.6    | 141 | 171       | No                                |     |     |     |    |  |  |  |
| LATQSNITIPVTFESR        | K                        | A     | 95.00%                                                        | 92                       | 953.5092  | 2                                                    | 9.5    | 172 | 188       | No                                |     |     |     |    |  |  |  |
| LATQSNITIPVTFESR        | K                        | A     | 95.00%                                                        | 36                       | 636.0084  | 3                                                    | 9.1    | 172 | 188       | No                                |     |     |     |    |  |  |  |
| LFDQAFGLPR              | R                        | L     | 95.00%                                                        | 86                       | 582.3166  | 2                                                    | 3.3    | 28  | 37        | No                                |     |     |     |    |  |  |  |
| PLPPAAIESPAVAAPAYSR     | R                        | A     | 95.00%                                                        | 89                       | 939.5185  | 2                                                    | 8.8    | 57  | 75        | No                                |     |     |     |    |  |  |  |
| PLPPAAIESPAVAAPAYSR     | R                        | A     | 95.00%                                                        | 46                       | 626.6817  | 3                                                    | 9.0    | 57  | 75        | No                                |     |     |     |    |  |  |  |
| QLSSGVSEIR              | R                        | H     | 95.00%                                                        | 34                       | 578.2777  | 2                                                    | 5.5    | 80  | 89        | No                                |     |     |     |    |  |  |  |
| QLSSGVSEIR              | R                        | H     | 95.00%                                                        | 67                       | 538.2945  | 2                                                    | 5.9    | 80  | 89        | No                                |     |     |     |    |  |  |  |
| RVFSLLR                 | R                        | G     | 95.00%                                                        | 25                       | 494.3115  | 2                                                    | 4.9    | 5   | 12        | No                                |     |     |     |    |  |  |  |
| TKDGVVEITGK             | K                        | H     | 95.00%                                                        | 56                       | 573.8265  | 2                                                    | 6.8    | 113 | 123       | No                                |     |     |     |    |  |  |  |
| TKDGVVEITGKHEER         | K                        | Q     | 95.00%                                                        | 75                       | 566.6353  | 3                                                    | 4.7    | 113 | 127       | No                                |     |     |     |    |  |  |  |
| TKDGVVEITGKHEER         | K                        | Q     | 95.00%                                                        | 33                       | 425.2281  | 4                                                    | 3.7    | 113 | 127       | No                                |     |     |     |    |  |  |  |
| VPFSLLR                 | R                        | G     | 95.00%                                                        | 48                       | 416.2607  | 2                                                    | 5.2    | 6   | 12        | No                                |     |     |     |    |  |  |  |
| VSLDNNHFAPDELTVK        | R                        | T     | 95.00%                                                        | 77                       | 892.4739  | 2                                                    | 9.4    | 97  | 112       | No                                |     |     |     |    |  |  |  |
| VSLDNNHFAPDELTVK        | R                        | T     | 95.00%                                                        | 44                       | 595.3168  | 3                                                    | 6.6    | 97  | 112       | No                                |     |     |     |    |  |  |  |

|                       |             |      |                                                                   |                     |                |          |                                                        |                              |                |                |           |        |      |      |          |    |     |     |     |    |
|-----------------------|-------------|------|-------------------------------------------------------------------|---------------------|----------------|----------|--------------------------------------------------------|------------------------------|----------------|----------------|-----------|--------|------|------|----------|----|-----|-----|-----|----|
| 193                   | IPI00025753 | DSG1 | DESMOGLEIN-1 PRECURSOR.                                           | ALNSMGQDLERPLELR    | R              | V        | 95.00%                                                 | 29                           | M5: Oxidation  | 619.9927       | 3         | 7.1    | 129  | 144  | No       |    |     |     |     |    |
|                       |             |      |                                                                   | IIRQEPSDSPMFIINR    | K              | N        | 95.00%                                                 | 37                           |                | M11: Oxidation | 644.6776  | 3      | 8.2  | 198  | 213      | No |     |     |     |    |
|                       |             |      |                                                                   | ISGVGIDQPPYGFIVINQK | R              | T        | 95.00%                                                 | 76                           |                |                | 1023.0660 | 2      | 7.8  | 87   | 105      | No |     |     |     |    |
|                       |             |      |                                                                   | QEPSDSPMFIINR       | R              | N        | 95.00%                                                 | 39                           |                | M8: Oxidation  | 775.3764  | 2      | 8.3  | 201  | 213      | No |     |     |     |    |
|                       |             |      |                                                                   | TMNNFLDREQYGOYALAVR | R              | G        | 95.00%                                                 | 51                           |                | M2: Oxidation  | 769.0458  | 3      | 7.9  | 220  | 238      | No |     |     |     |    |
|                       |             |      |                                                                   | VGDFVATDLDTGRPSTTVR | K              | Y        | 95.00%                                                 | 38                           |                |                | 669.6817  | 3      | 7.2  | 404  | 422      | No |     |     |     |    |
|                       |             |      |                                                                   | YGGTILSIDNLQR       | K              | T        | 95.00%                                                 | 46                           |                |                | 818.4271  | 2      | 7.4  | 460  | 473      | No |     |     |     |    |
|                       |             |      |                                                                   | YVMGNPNADLLAVDSR    | R              | T        | 95.00%                                                 | 73                           |                | M3: Oxidation  | 875.9324  | 2      | 7.8  | 423  | 438      | No |     |     |     |    |
|                       |             |      |                                                                   |                     |                |          |                                                        |                              |                |                |           |        |      |      |          |    |     |     |     |    |
|                       |             |      |                                                                   |                     |                |          | NADH DEHYDROGENASE [UBIQUINONE] IRON-SULFUR PROTEIN 3, |                              |                |                |           |        |      |      |          |    |     |     |     |    |
|                       |             |      |                                                                   |                     |                |          | MITOCHONDRIALPRECURSOR.                                |                              |                |                |           |        |      |      |          |    |     |     |     |    |
|                       |             |      |                                                                   |                     |                |          |                                                        |                              |                |                |           |        |      |      |          |    |     |     |     |    |
|                       |             |      |                                                                   | 194                 | IPI00025796    | NDUFS3   |                                                        | DFPLSGYVELR                  |                | K              | Y         | 95.00% | 76   |      | 648.3408 | 2  | 7.7 | 201 | 211 | No |
| FEIVYNLLSLR           | R           | F    | 95.00%                                                            |                     |                |          |                                                        | 52                           |                | 683.8954       | 2         | 7.0    | 126  | 136  | No       |    |     |     |     |    |
| ILTDYGFEGHPFR         | R           | K    | 95.00%                                                            |                     |                |          |                                                        | 59                           |                | 776.3881       | 2         | 5.6    | 187  | 199  | No       |    |     |     |     |    |
| ILTDYGFEGHPFR         | R           | K    | 95.00%                                                            |                     |                |          |                                                        | 30                           |                | 517.9300       | 3         | 9.4    | 187  | 199  | No       |    |     |     |     |    |
| KFDLNSPIWEAFVVR       | R           | Q    | 95.00%                                                            |                     |                |          |                                                        | 35                           |                | 623.6554       | 3         | 9.1    | 232  | 246  | No       |    |     |     |     |    |
| QLSAFGEYVAEILPK       | K           | Y    | 95.00%                                                            |                     |                |          |                                                        | 83                           |                | 832.9564       | 2         | 8.9    | 57   | 71   | No       |    |     |     |     |    |
| QNRFEIVYNLLSLR        | R           | F    | 95.00%                                                            |                     |                |          |                                                        | 51                           |                | 589.0018       | 3         | 7.7    | 123  | 136  | No       |    |     |     |     |    |
| SLVDLTAVDVPTTR        | K           | Q    | 95.00%                                                            |                     |                |          |                                                        | 33                           |                | 693.3901       | 2         | 5.9    | 110  | 122  | No       |    |     |     |     |    |
| TYTDELTPIESAVSVFK     | K           | A    | 95.00%                                                            |                     |                |          |                                                        | 71                           |                | 950.4918       | 2         | 8.8    | 145  | 161  | No       |    |     |     |     |    |
| VVAEPVELAQEFR         | R           | K    | 95.00%                                                            |                     |                |          |                                                        | 88                           |                | 743.9053       | 2         | 8.2    | 219  | 231  | No       |    |     |     |     |    |
| VVAEPVELAQEFR         | R           | K    | 95.00%                                                            |                     |                |          |                                                        | 34                           |                | 496.2733       | 3         | 9.2    | 219  | 231  | No       |    |     |     |     |    |
| VVAEPVELAQEFRK        | R           | F    | 95.00%                                                            |                     |                |          |                                                        | 49                           |                | 807.9543       | 2         | 9.4    | 219  | 232  | No       |    |     |     |     |    |
| AFHAFDKDGDGIK         | R           | L    | 95.00%                                                            |                     |                |          |                                                        | 44                           |                | 511.9306       | 3         | 3.7    | 795  | 808  | No       |    |     |     |     |    |
| DDFFLYNASK            | K           | A    | 95.00%                                                            |                     |                |          |                                                        | 41                           |                | 552.7750       | 2         | 5.0    | 523  | 531  | No       |    |     |     |     |    |
| FPIQFVWK              | K           | R    | 95.00%                                                            |                     |                |          |                                                        | 42                           |                | 532.8034       | 2         | 5.2    | 93   | 100  | No       |    |     |     |     |    |
| GHAYSVTGLDEVVFKGEK    | R           | V    | 95.00%                                                            |                     |                |          |                                                        | 102                          |                | 967.4951       | 2         | 8.5    | 333  | 350  | No       |    |     |     |     |    |
| GHAYSVTGLDEVVFKGEK    | R           | V    | 95.00%                                                            |                     |                |          |                                                        | 59                           |                | 645.3298       | 3         | 4.0    | 333  | 350  | No       |    |     |     |     |    |
| HYDTDQSGTINSYEMR      | K           | N    | 95.00%                                                            |                     |                |          |                                                        | 101                          | M15: Oxidation | 966.9150       | 2         | 9.7    | 733  | 748  | No       |    |     |     |     |    |
| HYDTDQSGTINSYEMR      | K           | N    | 95.00%                                                            |                     |                |          |                                                        | 38                           | M15: Oxidation | 644.9429       | 3         | 5.0    | 733  | 748  | No       |    |     |     |     |    |
| LNLQEFHLLWNL          | K           | I    | 95.00%                                                            |                     |                |          |                                                        | 40                           |                | 526.9467       | 3         | 4.1    | 712  | 723  | No       |    |     |     |     |    |
| NAVNDAGFHLNNQLYDIITMR | R           | Y    | 95.00%                                                            | 78                  | M20: Oxidation | 812.4028 | 3                                                      | 6.1                          | 749            | 769            | No        |        |      |      |          |    |     |     |     |    |
| NEFWSSALLEK           | R           | A    | 95.00%                                                            | 43                  |                | 618.8230 | 2                                                      | 9.4                          | 198            | 207            | No        |        |      |      |          |    |     |     |     |    |
| NFPDTFWTNPQYR         | R           | L    | 95.00%                                                            | 36                  |                | 843.3969 | 2                                                      | 8.7                          | 449            | 461            | No        |        |      |      |          |    |     |     |     |    |
| NLSEEVENTISVDRPVK     | R           | K    | 95.00%                                                            | 100                 |                | 965.0080 | 2                                                      | 7.9                          | 579            | 595            | No        |        |      |      |          |    |     |     |     |    |
|                       |             |      | SMIALMDDTGSJK                                                     | R                   | L              | 95.00%   | 48                                                     | M2: Oxidation, M6: Oxidation | 679.3083       | 2              | 7.9       | 699    | 711  | No   |          |    |     |     |     |    |
|                       |             |      | TKPIIFVSDR                                                        | K                   | A              | 95.00%   | 30                                                     |                              | 588.3466       | 2              | 5.4       | 599    | 608  | No   |          |    |     |     |     |    |
|                       |             |      | DOLICHYL-DIPHOSPHOOLIGOSACCHARIDE--PROTEIN GLYCOSYLTRANSFERASE 67 |                     |                |          |                                                        |                              |                |                |           |        |      |      |          |    |     |     |     |    |
|                       |             |      | KDASUBUNIT PRECURSOR.                                             |                     |                |          |                                                        |                              |                |                |           |        |      |      |          |    |     |     |     |    |
| 196                   | IPI00025874 | RPN1 |                                                                   | ALTSEIALLQSR        | K              | L        | 95.00%                                                 | 63                           |                | 651.3801       | 2         | 7.1    | 564  | 575  | No       |    |     |     |     |    |
|                       |             |      |                                                                   | ATSFLLALEPELEAR     | R              | L        | 95.00%                                                 | 63                           |                | 830.4550       | 2         | 3.7    | 105  | 119  | No       |    |     |     |     |    |
|                       |             |      |                                                                   | FVDHVFDEQVIDSLTVK   | R              | I        | 95.00%                                                 | 104                          |                | 996.0162       | 2         | 5.9    | 394  | 410  | No       |    |     |     |     |    |
|                       |             |      |                                                                   | LPVALDPGAK          | K              | I        | 95.00%                                                 | 30                           |                | 490.7959       | 2         | 5.9    | 156  | 165  | No       |    |     |     |     |    |
|                       |             |      |                                                                   | NIEIDSPYEISR        | K              | A        | 95.00%                                                 | 74                           |                | 718.3624       | 2         | 6.9    | 419  | 430  | No       |    |     |     |     |    |
|                       |             |      |                                                                   | NLVEQHIQDIVVHYTFNK  | K              | V        | 95.00%                                                 | 50                           |                | 733.0564       | 3         | 6.0    | 454  | 471  | No       |    |     |     |     |    |
|                       |             |      |                                                                   | SEDLLDYGPFR         | R              | D        | 95.00%                                                 | 49                           |                | 656.3179       | 2         | 4.5    | 233  | 243  | No       |    |     |     |     |    |
|                       |             |      |                                                                   | TILPAAAQDVVYR       | K              | D        | 95.00%                                                 | 32                           |                | 740.8981       | 2         | 5.6    | 321  | 333  | No       |    |     |     |     |    |
|                       |             |      |                                                                   | VTAEVVLAHLGGGSTR    | K              | A        | 95.00%                                                 | 49                           |                | 827.4531       | 2         | 3.6    | 88   | 104  | No       |    |     |     |     |    |
|                       |             |      |                                                                   | VTAEVVLAHLGGGSTR    | K              | A        | 95.00%                                                 | 67                           |                | 551.9714       | 3         | 3.6    | 88   | 104  | No       |    |     |     |     |    |
|                       |             |      |                                                                   | AAYLQNLNSADLLK      | K              | A        | 95.00%                                                 | 90                           |                | 767.4200       | 2         | 2.9    | 387  | 400  | No       |    |     |     |     |    |
|                       |             |      |                                                                   | AAYLQNLNSADLLK      | K              | A        | 95.00%                                                 | 47                           |                | 511.9507       | 3         | 5.7    | 387  | 400  | No       |    |     |     |     |    |
|                       |             |      |                                                                   | ADIAESQVNK          | R              | L        | 95.00%                                                 | 52                           |                | 1074.5510      | 1         | 7.4    | 1914 | 1923 | Yes      |    |     |     |     |    |
|                       |             |      |                                                                   | ADIAESQVNK          | R              | L        | 95.00%                                                 | 81                           |                | 537.7761       | 2         | 1.1    | 1914 | 1923 | Yes      |    |     |     |     |    |
|                       |             |      |                                                                   | ADIAESQVNLKLR       | R              | V        | 95.00%                                                 | 34                           |                | 448.5825       | 3         | 2.7    | 1914 | 1925 | Yes      |    |     |     |     |    |
|                       |             |      |                                                                   | AEEDEEINAELTAK      | R              | K        | 95.00%                                                 | 117                          |                | 781.3685       | 2         | 3.7    | 930  | 943  | Yes      |    |     |     |     |    |
|                       |             |      |                                                                   | AEEDEEINAELTAK      | R              | K        | 95.00%                                                 | 73                           |                | 521.2471       | 3         | 1.3    | 930  | 943  | Yes      |    |     |     |     |    |
|                       |             |      |                                                                   | AGLLGILLEMR         | K              | D        | 95.00%                                                 | 88                           | M10: Oxidation | 609.3355       | 2         | 5.4    | 771  | 781  | Yes      |    |     |     |     |    |
|                       |             |      |                                                                   | AGLLGILLEMR         | K              | D        | 95.00%                                                 | 58                           | M10: Oxidation | 406.5597       | 3         | 5.7    | 771  | 781  | Yes      |    |     |     |     |    |
|                       |             |      |                                                                   | AGLLGILLEMR         | K              | D        | 95.00%                                                 | 62                           |                | 1201.6510      | 1         | -9.1   | 771  | 781  | Yes      |    |     |     |     |    |
| AGLLGILLEMR           | K           | D    | 95.00%                                                            | 94                  |                | 601.3371 | 2                                                      | 3.9                          | 771            | 781            | Yes       |        |      |      |          |    |     |     |     |    |
| AGLLGILLEMRDEK        | K           | L    | 95.00%                                                            | 75                  | M10: Oxidation | 795.4216 | 2                                                      | 9.0                          | 771            | 784            | Yes       |        |      |      |          |    |     |     |     |    |
| AGLLGILLEMRDEK        | K           | L    | 95.00%                                                            | 48                  | M10: Oxidation | 530.6150 | 3                                                      | 5.1                          | 771            | 784            | Yes       |        |      |      |          |    |     |     |     |    |
| AGLLGILLEMRDEK        | K           | L    | 95.00%                                                            | 90                  |                | 787.4214 | 2                                                      | 5.6                          | 771            | 784            | Yes       |        |      |      |          |    |     |     |     |    |
| AGLLGILLEMRDEK        | K           | L    | 95.00%                                                            | 48                  |                | 525.2841 | 3                                                      | 6.6                          | 771            | 784            | Yes       |        |      |      |          |    |     |     |     |    |
|                       |             |      | AITDAAMMAEELK                                                     | K                   | K              | 95.00%   | 86                                                     | M7: Oxidation, M8: Oxidation | 713.3404       | 2              | 8.6       | 1762   | 1774 | Yes  |          |    |     |     |     |    |
|                       |             |      | AITDAAMMAEELK                                                     | K                   | K              | 95.00%   | 45                                                     | M7: Oxidation, M8: Oxidation | 475.8937       | 3              | 3.3       | 1762   | 1774 | Yes  |          |    |     |     |     |    |
|                       |             |      | AITDAAMMAEELKK                                                    | K                   | E              | 95.00%   | 102                                                    | M7: Oxidation                | 769.3866       | 2              | 3.0       | 1762   | 1775 | Yes  |          |    |     |     |     |    |
|                       |             |      | AITDAAMMAEELKK                                                    | K                   | E              | 95.00%   | 44                                                     | M7: Oxidation                | 513.2606       | 3              | 3.4       | 1762   | 1775 | Yes  |          |    |     |     |     |    |

|                         |   |   |        |     |                                              |           |   |      |      |      |     |
|-------------------------|---|---|--------|-----|----------------------------------------------|-----------|---|------|------|------|-----|
| AITDAAMMAEELKK          | K | E | 95.00% | 83  | M7: Oxidation                                | 777.3852  | 2 | 4.5  | 1762 | 1775 | Yes |
| AITDAAMMAEELKK          | K | E | 95.00% | 52  | M7: Oxidation                                | 518.5913  | 3 | 1.7  | 1762 | 1775 | Yes |
| AITDAAMMAEELKK          | K | E | 95.00% | 83  | M7: Oxidation, M8: Oxidation                 | 777.3852  | 2 | 4.5  | 1762 | 1775 | Yes |
| AITDAAMMAEELKK          | K | E | 95.00% | 52  | M7: Oxidation, M8: Oxidation                 | 518.5913  | 3 | 1.7  | 1762 | 1775 | Yes |
| AITDAAMMAEELKK          | K | E | 95.00% | 97  | M8: Oxidation                                | 769.3875  | 2 | 4.2  | 1762 | 1775 | Yes |
| AITDAAMMAEELKK          | K | E | 95.00% | 52  | M8: Oxidation                                | 513.2598  | 3 | 1.9  | 1762 | 1775 | Yes |
| AITDAAMMAEELKK          | K | E | 95.00% | 111 |                                              | 761.3883  | 2 | 1.9  | 1762 | 1775 | Yes |
| AITDAAMMAEELKK          | K | E | 95.00% | 77  |                                              | 507.9281  | 3 | 1.8  | 1762 | 1775 | Yes |
| AITDAAMMAEELKKEQDTSAHLE |   |   |        |     | M7: Oxidation, M8: Oxidation                 |           |   |      |      |      |     |
| R                       | K | M | 95.00% | 37  |                                              | 907.4404  | 3 | 6.9  | 1762 | 1785 | Yes |
| ALEDQLEIK               | R | T | 95.00% | 51  |                                              | 1145.6110 | 1 | 4.7  | 1255 | 1264 | No  |
| ALEDQLEIK               | R | T | 95.00% | 85  |                                              | 573.3087  | 2 | 3.5  | 1255 | 1264 | No  |
| ALEDQLEIKTKEEEQQR       | R | L | 95.00% | 50  |                                              | 725.3740  | 3 | 5.5  | 1255 | 1272 | No  |
| ALQEAHQQLDDLQAEEDK      | K | V | 95.00% | 52  |                                              | 728.0195  | 3 | 7.4  | 1002 | 1020 | Yes |
| ALQEAHQQLDDLQAEEDKVNT   |   |   |        |     |                                              |           |   |      |      |      |     |
| LTK                     | K | A | 95.00% | 100 |                                              | 946.8147  | 3 | 5.8  | 1002 | 1026 | Yes |
| ALQEAHQQLDDLQAEEDKVNT   |   |   |        |     |                                              |           |   |      |      |      |     |
| LTK                     | K | A | 95.00% | 63  |                                              | 710.3631  | 4 | 5.9  | 1002 | 1026 | Yes |
| ANLLQAEIEELR            | R | A | 95.00% | 105 |                                              | 699.8846  | 2 | 1.4  | 1682 | 1693 | Yes |
| ANLLQAEIEELR            | R | A | 95.00% | 108 |                                              | 466.9276  | 3 | 5.6  | 1682 | 1693 | Yes |
| ANLLQAEIEELRATLEQTER    | R | S | 95.00% | 46  |                                              | 1164.1250 | 2 | 9.2  | 1682 | 1701 | Yes |
| ANLLQAEIEELRATLEQTER    | R | S | 95.00% | 73  |                                              | 776.4185  | 3 | 8.2  | 1682 | 1701 | Yes |
| ANSEVAQWR               | K | T | 95.00% | 51  |                                              | 1060.5270 | 1 | 9.1  | 1368 | 1376 | Yes |
| ANSEVAQWR               | K | T | 95.00% | 66  |                                              | 530.7642  | 2 | 2.9  | 1368 | 1376 | Yes |
| ATLEQTER                | R | S | 95.00% | 72  |                                              | 474.2453  | 2 | 3.0  | 1694 | 1701 | Yes |
| DDQVFPMNPPK             | K | Y | 95.00% | 90  | M7: Oxidation                                | 652.3057  | 2 | 3.1  | 74   | 84   | Yes |
| DDQVFPMNPPK             | K | Y | 95.00% | 84  |                                              | 644.3124  | 2 | 9.6  | 74   | 84   | Yes |
| DDQVFPMNPPKYDK          | K | I | 95.00% | 47  | M7: Oxidation                                | 855.4003  | 2 | 4.7  | 74   | 87   | Yes |
| DIDDLELTLAK             | K | V | 95.00% | 54  |                                              | 1245.6670 | 1 | 7.2  | 957  | 967  | Yes |
| DIDDLELTLAK             | K | V | 95.00% | 99  |                                              | 623.3293  | 2 | -5.9 | 957  | 967  | Yes |
| DLEEATLQHEATAATLR       | R | K | 95.00% | 159 |                                              | 934.9748  | 2 | 3.3  | 1181 | 1197 | Yes |
| DLEEATLQHEATAATLR       | R | K | 95.00% | 65  |                                              | 623.6530  | 3 | 4.2  | 1181 | 1197 | Yes |
| DLEEATLQHEATAATLRK      | R | K | 95.00% | 120 |                                              | 990.0282  | 2 | 9.0  | 1181 | 1198 | Yes |
| DLEEATLQHEATAATLRK      | R | K | 95.00% | 83  |                                              | 666.3520  | 3 | 4.8  | 1181 | 1198 | Yes |
| DLQHRLEAEQLALK          | K | G | 95.00% | 52  |                                              | 889.9805  | 2 | 7.1  | 1796 | 1810 | Yes |
| DLQHRLEAEQLALK          | K | G | 95.00% | 58  |                                              | 593.6564  | 3 | 7.3  | 1796 | 1810 | Yes |
| DPLNETVVGLYQK           | K | S | 95.00% | 91  |                                              | 738.3958  | 2 | 6.1  | 602  | 614  | Yes |
| DTLVSQLSR               | K | G | 95.00% | 46  |                                              | 1018.5600 | 1 | 6.5  | 1299 | 1307 | No  |
| DTLVSQLSR               | K | G | 95.00% | 59  |                                              | 509.7830  | 2 | 4.8  | 1299 | 1307 | No  |
| DTQLHLDDALR             | K | S | 95.00% | 86  |                                              | 648.8323  | 2 | 1.4  | 1656 | 1666 | No  |
| DTQLHLDDALR             | K | S | 95.00% | 38  |                                              | 432.8916  | 3 | 3.3  | 1656 | 1666 | No  |
| EAEFQK                  | R | M | 95.00% | 32  |                                              | 751.3677  | 1 | 6.7  | 1172 | 1177 | Yes |
| EEQAEPDGTEVADK          | R | A | 95.00% | 98  |                                              | 759.3368  | 2 | 3.3  | 373  | 386  | Yes |
| EEQAEPDGTEVADKAAAYLQNLN |   |   |        |     |                                              |           |   |      |      |      |     |
| SADLLK                  | R | A | 95.00% | 36  |                                              | 1011.5030 | 3 | 7.6  | 373  | 400  | No  |
| EFEMSGLQSK              | K | I | 95.00% | 54  | M4: Oxidation                                | 586.2726  | 2 | 5.8  | 1088 | 1097 | No  |
| EFEMSGLQSK              | K | I | 95.00% | 54  |                                              | 1155.5410 | 1 | 5.0  | 1088 | 1097 | No  |
| EFEMSGLQSK              | K | I | 95.00% | 44  |                                              | 578.2737  | 2 | 3.4  | 1088 | 1097 | No  |
| EKSEMMEIDDLASNMETVSK    | K | A | 95.00% | 54  | M5: Oxidation, M7: Oxidation, M16: Oxidation | 821.7071  | 3 | 4.8  | 1224 | 1244 | No  |
| ELEEISER                | R | L | 95.00% | 49  |                                              | 1004.4910 | 1 | 0.9  | 1146 | 1153 | Yes |
| ELEEISER                | R | L | 95.00% | 42  |                                              | 502.7503  | 2 | 2.7  | 1146 | 1153 | Yes |
| ELEEISERLEEAGGATSAQIEMN |   |   |        |     |                                              |           |   |      |      |      |     |
| K                       | R | K | 95.00% | 100 | M22: Oxidation                               | 1325.6430 | 2 | 9.9  | 1146 | 1169 | Yes |
| ELEEISERLEEAGGATSAQIEMN |   |   |        |     |                                              |           |   |      |      |      |     |
| K                       | R | K | 95.00% | 95  | M22: Oxidation                               | 884.0965  | 3 | 8.4  | 1146 | 1169 | Yes |
| ELEEISERLEEAGGATSAQIEMN |   |   |        |     |                                              |           |   |      |      |      |     |
| K                       | R | K | 95.00% | 76  | M22: Oxidation                               | 663.3228  | 4 | 6.1  | 1146 | 1169 | Yes |
| ELEEISERLEEAGGATSAQIEMN |   |   |        |     |                                              |           |   |      |      |      |     |
| K                       | R | K | 95.00% | 120 |                                              | 1317.6430 | 2 | 7.9  | 1146 | 1169 | Yes |
| ELEEISERLEEAGGATSAQIEMN |   |   |        |     |                                              |           |   |      |      |      |     |
| K                       | R | K | 95.00% | 84  |                                              | 878.7634  | 3 | 6.7  | 1146 | 1169 | Yes |
| ELEEISERLEEAGGATSAQIEMN |   |   |        |     |                                              |           |   |      |      |      |     |
| K                       | R | K | 95.00% | 51  |                                              | 659.3240  | 4 | 5.9  | 1146 | 1169 | Yes |
| ELEEISERLEEAGGATSAQIEMN |   |   |        |     |                                              |           |   |      |      |      |     |
| KK                      | R | R | 95.00% | 70  | M22: Oxidation                               | 926.7932  | 3 | 6.2  | 1146 | 1170 | Yes |

|                         |   |   |        |     |                                             |           |   |     |      |      |     |  |  |
|-------------------------|---|---|--------|-----|---------------------------------------------|-----------|---|-----|------|------|-----|--|--|
| ELEEISERLEEAGGATSAQIEMN |   |   |        |     |                                             |           |   |     |      |      |     |  |  |
| KK                      | R | R | 95.00% | 37  | M22: Oxidation                              | 695.3460  | 4 | 5.0 | 1146 | 1170 | Yes |  |  |
| ELEEISERLEEAGGATSAQIEMN |   |   |        |     |                                             |           |   |     |      |      |     |  |  |
| KK                      | R | R | 95.00% | 47  |                                             | 921.4638  | 3 | 8.7 | 1146 | 1170 | Yes |  |  |
| ELEGEVESEQK             | R | R | 95.00% | 49  |                                             | 638.8011  | 2 | 2.7 | 1825 | 1835 | Yes |  |  |
| ELEGEVESEQKR            | R | N | 95.00% | 74  |                                             | 716.8548  | 2 | 6.8 | 1825 | 1836 | Yes |  |  |
| ELEGEVESEQR             | R | N | 95.00% | 38  |                                             | 478.2381  | 3 | 4.6 | 1825 | 1836 | Yes |  |  |
| ELTYQTEEDR              | K | K | 95.00% | 51  |                                             | 642.2961  | 2 | 6.8 | 1853 | 1862 | Yes |  |  |
| ELTYQTEEDRK             | K | N | 95.00% | 70  |                                             | 706.3410  | 2 | 2.5 | 1853 | 1863 | Yes |  |  |
| ELTYQTEEDRK             | K | N | 95.00% | 42  |                                             | 471.2320  | 3 | 6.8 | 1853 | 1863 | Yes |  |  |
| ELTYQTEEDRKNILR         | K | L | 95.00% | 46  |                                             | 954.5008  | 2 | 5.8 | 1853 | 1867 | Yes |  |  |
| ELTYQTEEDRKNILR         | K | L | 95.00% | 39  |                                             | 636.6688  | 3 | 4.2 | 1853 | 1867 | Yes |  |  |
| EMANMKEEFEK             | K | T | 95.00% | 40  | M2: Oxidation, M5: Oxidation                | 709.3088  | 2 | 8.4 | 852  | 862  | No  |  |  |
| ENKNLQQEISDLTEQIAEGGK   | R | R | 95.00% | 56  |                                             | 782.0655  | 3 | 7.4 | 1505 | 1525 | Yes |  |  |
| ENKNLQQEISDLTEQIAEGGKR  | R | I | 95.00% | 59  |                                             | 834.1010  | 3 | 9.1 | 1505 | 1526 | Yes |  |  |
| ENKNLQQEISDLTEQIAEGGKR  | R | I | 95.00% | 50  |                                             | 625.8258  | 4 | 6.1 | 1505 | 1526 | Yes |  |  |
| ENQSILITGESGAGK         | R | T | 95.00% | 118 |                                             | 752.3882  | 2 | 1.9 | 171  | 185  | Yes |  |  |
| ENQSILITGESGAGK         | R | T | 95.00% | 46  |                                             | 501.9288  | 3 | 3.5 | 171  | 185  | Yes |  |  |
| EODTSAHLER              | K | M | 95.00% | 69  |                                             | 593.2841  | 2 | 8.6 | 1776 | 1785 | Yes |  |  |
| EQLAMVER                | K | R | 95.00% | 54  | M5: Oxidation                               | 496.2496  | 2 | 3.0 | 1673 | 1680 | Yes |  |  |
| EQLAMVER                | K | R | 95.00% | 41  |                                             | 488.2543  | 2 | 7.4 | 1673 | 1680 | Yes |  |  |
| EQYEEEEQAK              | R | A | 95.00% | 45  |                                             | 641.7803  | 2 | 6.9 | 1349 | 1358 | No  |  |  |
| EQYEEEEQAKAELQR         | R | A | 95.00% | 90  |                                             | 940.4437  | 2 | 6.4 | 1349 | 1363 | No  |  |  |
| EQYEEEEQAKAELQR         | R | A | 95.00% | 34  |                                             | 627.2961  | 3 | 2.7 | 1349 | 1363 | No  |  |  |
| ERIEAQNKPFDK            | R | T | 95.00% | 48  |                                             | 773.4089  | 2 | 4.7 | 23   | 35   | No  |  |  |
| EVTARAEDEEEINAELTAK     | K | K | 95.00% | 123 |                                             | 1088.5220 | 2 | 4.6 | 925  | 943  | Yes |  |  |
| EVTARAEDEEEINAELTAK     | K | K | 95.00% | 64  |                                             | 726.0180  | 3 | 5.7 | 925  | 943  | Yes |  |  |
| GFLAR                   | R | V | 95.00% | 24  |                                             | 563.3323  | 1 | 3.0 | 798  | 802  | Yes |  |  |
| GKPEAHFSLIHAGTVDYNIAGW  |   |   |        |     |                                             |           |   |     |      |      |     |  |  |
| LDK                     | K | N | 95.00% | 92  |                                             | 968.1643  | 3 | 8.4 | 574  | 599  | No  |  |  |
| GKPEAHFSLIHAGTVDYNIAGW  |   |   |        |     |                                             |           |   |     |      |      |     |  |  |
| LDK                     | K | N | 95.00% | 35  |                                             | 726.3738  | 4 | 6.5 | 574  | 599  | No  |  |  |
| GKQAFQTQIEELKR          | R | Q | 95.00% | 103 |                                             | 838.4631  | 2 | 2.9 | 1308 | 1321 | Yes |  |  |
| GKQAFQTQIEELKR          | R | Q | 95.00% | 75  |                                             | 559.3111  | 3 | 2.5 | 1308 | 1321 | Yes |  |  |
| GKQAFQTQIEELKR          | R | Q | 95.00% | 35  |                                             | 419.7347  | 4 | 1.2 | 1308 | 1321 | Yes |  |  |
| GQTVQQVYNVAVGALAK       | K | A | 95.00% | 138 |                                             | 823.9529  | 2 | 7.0 | 417  | 432  | Yes |  |  |
| GQTVQQVYNVAVGALAK       | K | A | 95.00% | 75  |                                             | 549.6390  | 3 | 9.0 | 417  | 432  | Yes |  |  |
| GSSFQTVSALFR            | K | E | 95.00% | 46  |                                             | 1299.6800 | 1 | 7.8 | 645  | 656  | Yes |  |  |
| GSSFQTVSALFR            | K | E | 95.00% | 99  |                                             | 650.3406  | 2 | 2.9 | 645  | 656  | Yes |  |  |
| GSSFQTVSALFR            | K | E | 95.00% | 47  |                                             | 433.8970  | 3 | 4.3 | 645  | 656  | Yes |  |  |
| HADSVAVELGEQIDNLQR      | K | V | 95.00% | 166 |                                             | 947.9739  | 2 | 7.4 | 1200 | 1216 | Yes |  |  |
| HADSVAVELGEQIDNLQR      | K | V | 95.00% | 85  |                                             | 632.3179  | 3 | 6.4 | 1200 | 1216 | Yes |  |  |
| IAEKDEEIDQMK            | K | R | 95.00% | 55  | M11: Oxidation                              | 732.8539  | 2 | 7.2 | 1580 | 1591 | No  |  |  |
| IAEKDEEIDQMK            | K | R | 95.00% | 38  | M11: Oxidation                              | 488.9042  | 3 | 5.0 | 1580 | 1591 | No  |  |  |
| IAEKDEEIDQMK            | K | R | 95.00% | 74  |                                             | 724.8565  | 2 | 7.2 | 1580 | 1591 | No  |  |  |
| IAEKDEEIDQMKR           | K | N | 95.00% | 58  | M11: Oxidation                              | 810.9055  | 2 | 7.7 | 1580 | 1592 | No  |  |  |
| IAEKDEEIDQMKR           | K | N | 95.00% | 47  | M11: Oxidation                              | 540.9383  | 3 | 5.3 | 1580 | 1592 | No  |  |  |
| IAEKDEEIDQMKR           | K | N | 95.00% | 73  |                                             | 802.9050  | 2 | 4.0 | 1580 | 1592 | No  |  |  |
| IAEKDEEIDQMKR           | K | N | 95.00% | 68  |                                             | 535.6075  | 3 | 6.9 | 1580 | 1592 | No  |  |  |
| IAEQELLDASER            | K | V | 95.00% | 87  |                                             | 687.3516  | 2 | 2.9 | 1705 | 1716 | Yes |  |  |
| IAEQELLDASER            | K | V | 95.00% | 37  |                                             | 458.5717  | 3 | 6.0 | 1705 | 1716 | Yes |  |  |
| IEAQNKPFDAK             | R | T | 95.00% | 40  |                                             | 630.8381  | 2 | 7.4 | 25   | 35   | Yes |  |  |
| IEDEQALGMQLQK           | K | K | 95.00% | 108 | M9: Oxidation                               | 759.8807  | 2 | 3.9 | 1098 | 1110 | No  |  |  |
| IEDEQALGMQLQK           | K | K | 95.00% | 56  | M9: Oxidation                               | 506.9252  | 3 | 8.1 | 1098 | 1110 | No  |  |  |
| IEDEQALGMQLQK           | K | K | 95.00% | 88  |                                             | 751.8838  | 2 | 4.7 | 1098 | 1110 | No  |  |  |
| IEDEQALGMQLQKK          | K | I | 95.00% | 40  | M9: Oxidation                               | 549.6210  | 3 | 2.8 | 1098 | 1111 | No  |  |  |
| IEDMAMMTHLHEPAVLYNLK    | K | E | 95.00% | 43  | M4: Oxidation, M6: Oxidation, M7: Oxidation | 802.0569  | 3 | 8.3 | 88   | 107  | Yes |  |  |
| IEDMAMMTHLHEPAVLYNLK    | K | E | 95.00% | 35  | M4: Oxidation, M6: Oxidation, M7: Oxidation | 601.7939  | 4 | 7.0 | 88   | 107  | Yes |  |  |
| IEDMAMMTHLHEPAVLYNLK    | K | E | 95.00% | 58  | M6: Oxidation                               | 791.3938  | 3 | 8.5 | 88   | 107  | Yes |  |  |
| IEDMAMMTHLHEPAVLYNLK    | K | E | 95.00% | 39  | M6: Oxidation                               | 796.7230  | 3 | 5.4 | 88   | 107  | Yes |  |  |
| IEDMAMMTHLHEPAVLYNLK    | K | E | 95.00% | 39  | M6: Oxidation, M7: Oxidation                | 796.7230  | 3 | 5.4 | 88   | 107  | Yes |  |  |
| IEDMAMMTHLHEPAVLYNLK    | K | E | 95.00% | 46  | M7: Oxidation                               | 791.3921  | 3 | 6.4 | 88   | 107  | Yes |  |  |
| IEDMAMMTHLHEPAVLYNLK    | K | E | 95.00% | 58  |                                             | 786.0606  | 3 | 6.6 | 88   | 107  | Yes |  |  |
| IEEEEEIEAER             | R | A | 95.00% | 103 |                                             | 744.8617  | 2 | 5.7 | 1119 | 1130 | Yes |  |  |

|                       |   |   |        |     |                              |           |   |      |      |      |     |
|-----------------------|---|---|--------|-----|------------------------------|-----------|---|------|------|------|-----|
| IEEEEEIEAER           | R | A | 95.00% | 67  |                              | 496.9096  | 3 | 4.0  | 1119 | 1130 | Yes |
| IHFGTTGK              | R | L | 95.00% | 46  |                              | 860.4694  | 1 | 7.2  | 253  | 260  | Yes |
| IHFGTTGK              | R | L | 95.00% | 29  |                              | 430.7379  | 2 | 5.7  | 253  | 260  | Yes |
| IKELQAR               | K | I | 95.00% | 31  |                              | 429.2654  | 2 | 2.3  | 1112 | 1118 | Yes |
| IKEVTER               | K | A | 95.00% | 35  |                              | 437.7546  | 2 | 1.7  | 923  | 929  | Yes |
| IKEVTERAEDEEEINAELTAK | K | K | 95.00% | 115 |                              | 1209.1170 | 2 | 9.3  | 923  | 943  | Yes |
| IKEVTERAEDEEEINAELTAK | K | K | 95.00% | 82  |                              | 806.4095  | 3 | 3.4  | 923  | 943  | Yes |
| IKEVTERAEDEEEINAELTAK | K | K | 95.00% | 50  |                              | 605.0596  | 4 | 4.3  | 923  | 943  | Yes |
| IKLEQQVDDLEGSLEQEK    | K | K | 95.00% | 166 |                              | 1051.0440 | 2 | 6.2  | 1029 | 1046 | Yes |
| IKLEQQVDDLEGSLEQEK    | K | K | 95.00% | 72  |                              | 701.0316  | 3 | 5.8  | 1029 | 1046 | Yes |
| IKLEQQVDDLEGSLEQEK    | K | I | 95.00% | 137 |                              | 1115.0950 | 2 | 9.1  | 1029 | 1047 | No  |
| IKLEQQVDDLEGSLEQEK    | K | I | 95.00% | 82  |                              | 743.7285  | 3 | 3.6  | 1029 | 1047 | No  |
| IKLEQQVDDLEGSLEQEK    | K | I | 95.00% | 45  |                              | 558.0484  | 4 | 3.7  | 1029 | 1047 | No  |
| IKNAYEESLDQLET        | K | R | 95.00% | 115 |                              | 947.5031  | 2 | 9.1  | 1488 | 1503 | Yes |
| IKNAYEESLDQLET        | K | R | 95.00% | 64  |                              | 632.0006  | 3 | 2.6  | 1488 | 1503 | Yes |
| IKNAYEESLDQLET        | K | E | 95.00% | 144 |                              | 1025.5530 | 2 | 7.5  | 1488 | 1504 | Yes |
| IKNAYEESLDQLET        | K | E | 95.00% | 88  |                              | 684.0358  | 3 | 4.6  | 1488 | 1504 | Yes |
| IKNAYEESLDQLET        | K | E | 95.00% | 74  |                              | 513.2789  | 4 | 4.8  | 1488 | 1504 | Yes |
| ILAEWK                | K | Q | 95.00% | 33  |                              | 759.4422  | 1 | 2.1  | 1456 | 1461 | Yes |
| ILYADFK               | R | Q | 95.00% | 47  |                              | 869.4793  | 1 | 2.2  | 717  | 723  | Yes |
| ILYADFK               | R | Q | 95.00% | 55  |                              | 435.2437  | 2 | 2.5  | 717  | 723  | Yes |
| INQQLDTK              | R | Q | 95.00% | 55  |                              | 480.2638  | 2 | 3.6  | 446  | 453  | Yes |
| INQQLDTKOPR           | R | Q | 95.00% | 60  |                              | 670.8722  | 2 | 5.7  | 446  | 456  | Yes |
| INQQLDTKOPR           | R | Q | 95.00% | 37  |                              | 447.5833  | 3 | 4.1  | 446  | 456  | Yes |
| IQHELEEAER            | R | A | 95.00% | 69  |                              | 691.8343  | 2 | 4.1  | 1903 | 1913 | No  |
| IQHELEEAER            | R | A | 95.00% | 59  |                              | 461.5593  | 3 | 5.1  | 1903 | 1913 | No  |
| IQHELEEAERADIAESQVNK  | R | L | 95.00% | 114 |                              | 1219.6040 | 2 | 8.0  | 1903 | 1923 | No  |
| IQHELEEAERADIAESQVNK  | R | L | 95.00% | 59  |                              | 813.4023  | 3 | 4.6  | 1903 | 1923 | No  |
| IQHELEEAERADIAESQVNK  | R | L | 95.00% | 59  |                              | 610.3048  | 4 | 6.5  | 1903 | 1923 | No  |
| IQLEAK                | K | I | 95.00% | 37  |                              | 701.4219  | 1 | 2.9  | 917  | 922  | Yes |
| IQLELNQVK             | R | S | 95.00% | 46  |                              | 1084.6430 | 1 | 5.9  | 1565 | 1573 | Yes |
| IQLELNQVK             | R | S | 95.00% | 74  |                              | 542.8235  | 2 | 2.1  | 1565 | 1573 | Yes |
| IQLELNQVKSEVDR        | R | K | 95.00% | 62  |                              | 835.9645  | 2 | 8.0  | 1565 | 1578 | Yes |
| IQLELNQVKSEVDRK       | R | I | 95.00% | 28  |                              | 450.5092  | 4 | 5.9  | 1565 | 1579 | Yes |
| IVESMQSTLDAEIR        | R | S | 95.00% | 129 | M5: Oxidation                | 804.4081  | 2 | 8.2  | 1597 | 1610 | Yes |
| IVESMQSTLDAEIR        | R | S | 95.00% | 55  | M5: Oxidation                | 536.6071  | 3 | 6.6  | 1597 | 1610 | Yes |
| IVESMQSTLDAEIR        | R | S | 95.00% | 114 |                              | 796.4084  | 2 | 5.4  | 1597 | 1610 | Yes |
| IVESMQSTLDAEIR        | R | S | 95.00% | 65  |                              | 531.2747  | 3 | 5.1  | 1597 | 1610 | Yes |
| KAITDAAMMAEELKK       | K | E | 95.00% | 101 | M8: Oxidation                | 833.4363  | 2 | 5.3  | 1761 | 1775 | Yes |
| KAITDAAMMAEELKK       | K | E | 95.00% | 81  | M8: Oxidation                | 555.9587  | 3 | 2.7  | 1761 | 1775 | Yes |
| KAITDAAMMAEELKK       | K | E | 95.00% | 35  | M8: Oxidation                | 417.2235  | 4 | 8.8  | 1761 | 1775 | Yes |
| KAITDAAMMAEELKK       | K | E | 95.00% | 80  | M8: Oxidation                | 841.4315  | 2 | 2.7  | 1761 | 1775 | Yes |
| KAITDAAMMAEELKK       | K | E | 95.00% | 64  | M8: Oxidation                | 561.2909  | 3 | 3.8  | 1761 | 1775 | Yes |
| KAITDAAMMAEELKK       | K | E | 95.00% | 80  | M8: Oxidation, M9: Oxidation | 841.4315  | 2 | 2.7  | 1761 | 1775 | Yes |
| KAITDAAMMAEELKK       | K | E | 95.00% | 64  | M8: Oxidation, M9: Oxidation | 561.2909  | 3 | 3.8  | 1761 | 1775 | Yes |
| KAITDAAMMAEELKK       | K | E | 95.00% | 103 | M9: Oxidation                | 833.4359  | 2 | 4.9  | 1761 | 1775 | Yes |
| KAITDAAMMAEELKK       | K | E | 95.00% | 63  | M9: Oxidation                | 555.9584  | 3 | 2.3  | 1761 | 1775 | Yes |
| KAITDAAMMAEELKK       | K | E | 95.00% | 37  | M9: Oxidation                | 417.2219  | 4 | 5.0  | 1761 | 1775 | Yes |
| KAITDAAMMAEELKK       | K | E | 95.00% | 107 |                              | 825.4387  | 2 | 5.2  | 1761 | 1775 | Yes |
| KAITDAAMMAEELKK       | K | E | 95.00% | 92  |                              | 550.6276  | 3 | 3.8  | 1761 | 1775 | Yes |
| KAITDAAMMAEELKK       | K | E | 95.00% | 42  |                              | 413.2216  | 4 | 1.3  | 1761 | 1775 | Yes |
| KALQEAHQQTLDLQAEEDKVN |   |   |        |     |                              |           |   |      |      |      |     |
| TLTK                  | K | A | 95.00% | 112 |                              | 989.5156  | 3 | 8.1  | 1001 | 1026 | Yes |
| KALQEAHQQTLDLQAEEDKVN |   |   |        |     |                              |           |   |      |      |      |     |
| TLTK                  | K | A | 95.00% | 62  |                              | 742.3849  | 4 | 3.0  | 1001 | 1026 | Yes |
| KALQEAHQQTLDLQAEEDKVN |   |   |        |     |                              |           |   |      |      |      |     |
| TLTK                  | K | A | 95.00% | 35  |                              | 594.1111  | 5 | 5.8  | 1001 | 1026 | Yes |
| KDIDDLELTLAK          | K | V | 95.00% | 109 |                              | 687.3849  | 2 | 6.4  | 956  | 967  | Yes |
| KDIDDLELTLAK          | K | V | 95.00% | 46  |                              | 458.5916  | 3 | 4.3  | 956  | 967  | Yes |
| KEFEMSGLQSK           | K | I | 95.00% | 45  | M5: Oxidation                | 650.3223  | 2 | 8.7  | 1087 | 1097 | No  |
| KGSSFQTVSALFR         | K | E | 95.00% | 125 |                              | 714.3884  | 2 | 3.1  | 644  | 656  | Yes |
| KGSSFQTVSALFR         | K | E | 95.00% | 57  |                              | 476.5949  | 3 | 3.2  | 644  | 656  | Yes |
| KHADSVaelGQIDNLQR     | K | V | 95.00% | 137 |                              | 1012.0210 | 2 | 6.5  | 1199 | 1216 | Yes |
| KHADSVaelGQIDNLQR     | K | V | 95.00% | 93  |                              | 675.0148  | 3 | 3.8  | 1199 | 1216 | Yes |
| KHADSVaelGQIDNLQR     | K | V | 95.00% | 66  |                              | 506.5136  | 4 | 4.9  | 1199 | 1216 | Yes |
| KIAEQELLDASER         | R | V | 95.00% | 123 |                              | 751.3984  | 2 | 1.7  | 1704 | 1716 | Yes |
| KIAEQELLDASER         | R | V | 95.00% | 64  |                              | 501.2686  | 3 | 2.5  | 1704 | 1716 | Yes |
| KKEFEMSGLQSK          | K | I | 95.00% | 60  | M6: Oxidation                | 714.3638  | 2 | -0.6 | 1086 | 1097 | No  |

|                              |   |   |        |     |                                                     |           |   |      |      |      |     |
|------------------------------|---|---|--------|-----|-----------------------------------------------------|-----------|---|------|------|------|-----|
| KKEFEMSGLQSK                 | K | I | 95.00% | 32  | M6: Oxidation                                       | 476.5830  | 3 | 9.0  | 1086 | 1097 | No  |
| KKEFEMSGLQSK                 | K | I | 95.00% | 53  |                                                     | 706.3683  | 2 | 2.2  | 1086 | 1097 | No  |
| KKGSFQTVSALFR                | K | E | 95.00% | 66  |                                                     | 778.4344  | 2 | 0.8  | 643  | 656  | Yes |
| KKGSFQTVSALFR                | K | E | 95.00% | 49  |                                                     | 519.2949  | 3 | 6.0  | 643  | 656  | Yes |
| KKHADSVAEELGEQIDNLQR         | R | V | 95.00% | 89  |                                                     | 717.7142  | 3 | 5.1  | 1198 | 1216 | Yes |
| KKHADSVAEELGEQIDNLQR         | R | V | 95.00% | 53  |                                                     | 538.5365  | 4 | 3.1  | 1198 | 1216 | Yes |
| KKLETDISIQGEMEDIQEAR         | K | N | 95.00% | 80  | M14: Oxidation                                      | 864.1106  | 3 | 4.8  | 1732 | 1753 | No  |
| KKLETDISIQGEMEDIQEAR         | K | N | 95.00% | 33  | M14: Oxidation                                      | 648.3342  | 4 | 3.8  | 1732 | 1753 | No  |
| KKLETDISIQGEMEDIQEAR         | K | N | 95.00% | 88  |                                                     | 858.7822  | 3 | 8.5  | 1732 | 1753 | No  |
| KKLETDISIQGEMEDIQEAR         | K | N | 95.00% | 54  |                                                     | 644.3368  | 4 | 5.9  | 1732 | 1753 | No  |
| KKMEGDLNEMEIQNLNHNHR         | K | M | 95.00% | 39  | M10: Oxidation                                      | 762.7066  | 3 | 3.1  | 1620 | 1638 | Yes |
| KKMEGDLNEMEIQNLNHNHR         | K | M | 95.00% | 39  | M10: Oxidation                                      | 572.2825  | 4 | 4.2  | 1620 | 1638 | Yes |
| KKMEGDLNEMEIQNLNHNHR         | K | M | 95.00% | 70  | M3: Oxidation                                       | 762.7060  | 3 | 2.4  | 1620 | 1638 | Yes |
| KKMEGDLNEMEIQNLNHNHR         | K | M | 95.00% | 77  | M3: Oxidation                                       | 572.2819  | 4 | 3.1  | 1620 | 1638 | Yes |
| KKMEGDLNEMEIQNLNHNHR         | K | M | 95.00% | 58  | M3: Oxidation                                       | 768.0369  | 3 | 1.3  | 1620 | 1638 | Yes |
| KKMEGDLNEMEIQNLNHNHR         | K | M | 95.00% | 54  | M3: Oxidation                                       | 576.2810  | 4 | 3.7  | 1620 | 1638 | Yes |
| KKMEGDLNEMEIQNLNHNHR         | K | M | 95.00% | 58  | M3: Oxidation,<br>M10: Oxidation,<br>M3: Oxidation, | 768.0369  | 3 | 1.3  | 1620 | 1638 | Yes |
| KKMEGDLNEMEIQNLNHNHR         | K | M | 95.00% | 54  | M10: Oxidation                                      | 576.2810  | 4 | 3.7  | 1620 | 1638 | Yes |
| KKMEGDLNEMEIQNLNHNHR         | K | M | 95.00% | 53  |                                                     | 757.3764  | 3 | 4.9  | 1620 | 1638 | Yes |
| KKMEGDLNEMEIQNLNHNHR         | K | M | 95.00% | 79  |                                                     | 568.2838  | 4 | 4.2  | 1620 | 1638 | Yes |
| KLEGLK                       | R | L | 95.00% | 39  |                                                     | 401.7396  | 2 | 4.6  | 1058 | 1064 | Yes |
| KLETDISIQGEMEDIQEAR          | K | N | 95.00% | 80  | M13: Oxidation                                      | 821.4150  | 3 | 8.4  | 1733 | 1753 | No  |
| KLETDISIQGEMEDIQEAR          | K | N | 95.00% | 148 |                                                     | 1223.6210 | 2 | 8.7  | 1733 | 1753 | No  |
| KLETDISIQGEMEDIQEAR          | K | N | 95.00% | 72  |                                                     | 816.0828  | 3 | 7.8  | 1733 | 1753 | No  |
| KMEGDLNEMEIQNLNHNHR          | K | M | 95.00% | 46  | M2: Oxidation                                       | 1079.5140 | 2 | 8.4  | 1621 | 1638 | Yes |
| KMEGDLNEMEIQNLNHNHR          | K | M | 95.00% | 76  | M2: Oxidation                                       | 720.0093  | 3 | 4.8  | 1621 | 1638 | Yes |
| KMEGDLNEMEIQNLNHNHR          | K | M | 95.00% | 53  | M2: Oxidation                                       | 540.2613  | 4 | 9.1  | 1621 | 1638 | Yes |
| KMEGDLNEMEIQNLNHNHR          | K | M | 95.00% | 90  | M2: Oxidation                                       | 1087.5110 | 2 | 8.1  | 1621 | 1638 | Yes |
| KMEGDLNEMEIQNLNHNHR          | K | M | 95.00% | 57  | M2: Oxidation                                       | 725.3447  | 3 | 9.9  | 1621 | 1638 | Yes |
| KMEGDLNEMEIQNLNHNHR          | K | M | 95.00% | 50  | M2: Oxidation                                       | 544.2559  | 4 | 1.3  | 1621 | 1638 | Yes |
| KMEGDLNEMEIQNLNHNHR          | K | M | 95.00% | 90  | M2: Oxidation, M9:<br>Oxidation                     | 1087.5110 | 2 | 8.1  | 1621 | 1638 | Yes |
| KMEGDLNEMEIQNLNHNHR          | K | M | 95.00% | 57  | M2: Oxidation, M9:<br>Oxidation                     | 725.3447  | 3 | 9.9  | 1621 | 1638 | Yes |
| KMEGDLNEMEIQNLNHNHR          | K | M | 95.00% | 50  | M2: Oxidation, M9:<br>Oxidation                     | 544.2559  | 4 | 1.3  | 1621 | 1638 | Yes |
| KMEGDLNEMEIQNLNHNHR          | K | M | 95.00% | 69  | M9: Oxidation                                       | 1079.5140 | 2 | 8.5  | 1621 | 1638 | Yes |
| KMEGDLNEMEIQNLNHNHR          | K | M | 95.00% | 67  | M9: Oxidation                                       | 720.0086  | 3 | 3.7  | 1621 | 1638 | Yes |
| KMEGDLNEMEIQNLNHNHR          | K | M | 95.00% | 36  | M9: Oxidation                                       | 540.2574  | 4 | 1.8  | 1621 | 1638 | Yes |
| KMEGDLNEMEIQNLNHNHR          | K | M | 95.00% | 115 |                                                     | 1071.5170 | 2 | 8.7  | 1621 | 1638 | Yes |
| KMEGDLNEMEIQNLNHNHR          | K | M | 95.00% | 89  |                                                     | 714.6783  | 3 | 5.6  | 1621 | 1638 | Yes |
| KMEGDLNEMEIQNLNHNHR          | K | M | 95.00% | 59  |                                                     | 536.2598  | 4 | 4.0  | 1621 | 1638 | Yes |
| KQVEQEKSLEQAALAEAEASLE       |   |   |        |     |                                                     |           |   |      |      |      |     |
| HEEGK                        | K | I | 95.00% | 57  |                                                     | 760.6304  | 4 | 7.4  | 1535 | 1561 | No  |
| KRQEAPPHIFSISDNAYQFMLTD<br>R | K | E | 95.00% | 89  | M20: Oxidation                                      | 960.8171  | 3 | 8.9  | 147  | 170  | Yes |
| KRQEAPPHIFSISDNAYQFMLTD<br>R | K | E | 95.00% | 97  |                                                     | 955.4839  | 3 | 7.2  | 147  | 170  | Yes |
| LAQLITR                      | K | T | 95.00% | 37  |                                                     | 814.5181  | 1 | 3.6  | 785  | 791  | Yes |
| LAQLITR                      | K | T | 95.00% | 59  |                                                     | 407.7621  | 2 | 1.4  | 785  | 791  | Yes |
| LASADIETYLLEK                | K | S | 95.00% | 129 |                                                     | 733.3926  | 2 | -1.2 | 261  | 273  | Yes |
| LASADIETYLLEK                | K | S | 95.00% | 66  |                                                     | 489.2671  | 3 | 4.5  | 261  | 273  | Yes |
| LDEAEQLALK                   | R | G | 95.00% | 51  |                                                     | 1129.6220 | 1 | 9.6  | 1801 | 1810 | Yes |
| LDEAEQLALK                   | R | G | 95.00% | 97  |                                                     | 565.3107  | 2 | 2.5  | 1801 | 1810 | Yes |
| LDEAEQLALKGGK                | R | K | 95.00% | 66  |                                                     | 686.3813  | 2 | 4.5  | 1801 | 1813 | Yes |
| LDEAEQLALKGGK                | R | K | 95.00% | 42  |                                                     | 457.9226  | 3 | 2.6  | 1801 | 1813 | Yes |
| LDEAEQLALKGGKK               | R | Q | 95.00% | 81  |                                                     | 750.4314  | 2 | 7.6  | 1801 | 1814 | Yes |
| LDEAEQLALKGGKK               | R | Q | 95.00% | 45  |                                                     | 500.6212  | 3 | 2.9  | 1801 | 1814 | Yes |
| LEEAGGATSAQIEMNK             | R | K | 95.00% | 157 | M14: Oxidation                                      | 832.8970  | 2 | 3.6  | 1154 | 1169 | Yes |
| LEEAGGATSAQIEMNK             | R | K | 95.00% | 68  | M14: Oxidation                                      | 555.6020  | 3 | 6.1  | 1154 | 1169 | Yes |
| LEEAGGATSAQIEMNK             | R | K | 95.00% | 134 |                                                     | 824.8989  | 2 | 2.7  | 1154 | 1169 | Yes |
| LEEAGGATSAQIEMNKK            | R | R | 95.00% | 88  | M14: Oxidation                                      | 896.9449  | 2 | 3.7  | 1154 | 1170 | Yes |
| LEEAGGATSAQIEMNKK            | R | R | 95.00% | 37  | M14: Oxidation                                      | 598.2982  | 3 | 2.0  | 1154 | 1170 | Yes |
| LEEAGGATSAQIEMNKK            | R | R | 95.00% | 105 |                                                     | 888.9479  | 2 | 4.3  | 1154 | 1170 | Yes |
| LEQQVDDLEGSLEQEK             | K | K | 95.00% | 144 |                                                     | 930.4526  | 2 | 5.2  | 1031 | 1046 | Yes |
| LEQQVDDLEGSLEQEK             | K | K | 95.00% | 113 |                                                     | 620.6381  | 3 | 5.9  | 1031 | 1046 | Yes |
| LEQQVDDLEGSLEQEKK            | K | I | 95.00% | 116 |                                                     | 994.5015  | 2 | 6.3  | 1031 | 1047 | No  |
| LEQQVDDLEGSLEQEKK            | K | I | 95.00% | 69  |                                                     | 663.3355  | 3 | 4.1  | 1031 | 1047 | No  |

|                         |   |   |        |     |                                  |           |   |     |      |      |     |
|-------------------------|---|---|--------|-----|----------------------------------|-----------|---|-----|------|------|-----|
| LETDISIQGEMEDIQEAR      | K | N | 95.00% | 109 | M12: Oxidation                   | 1167.5700 | 2 | 7.7 | 1734 | 1753 | No  |
| LETDISIQGEMEDIQEAR      | K | N | 95.00% | 139 |                                  | 1159.5730 | 2 | 8.4 | 1734 | 1753 | No  |
| LETDISIQGEMEDIQEAR      | K | N | 95.00% | 73  |                                  | 773.3831  | 3 | 6.4 | 1734 | 1753 | No  |
| LINDLTAQR               | R | A | 95.00% | 51  |                                  | 1043.5890 | 1 | 3.4 | 1273 | 1281 | Yes |
| LINDLTAQR               | R | A | 95.00% | 89  |                                  | 522.2970  | 2 | 1.1 | 1273 | 1281 | Yes |
| LQDAEEHVEAVNAK          | R | C | 95.00% | 124 |                                  | 776.8860  | 2 | 2.2 | 1401 | 1414 | No  |
| LQDAEEHVEAVNAK          | R | C | 95.00% | 47  |                                  | 518.2609  | 3 | 4.2 | 1401 | 1414 | No  |
| LQDLVDK                 | R | L | 95.00% | 35  |                                  | 830.4684  | 1 | 7.0 | 1868 | 1874 | Yes |
| LQDLVDK                 | R | L | 95.00% | 42  |                                  | 415.7369  | 2 | 4.1 | 1868 | 1874 | Yes |
| LQDLVDKLQAK             | R | V | 95.00% | 88  |                                  | 635.8749  | 2 | 3.6 | 1868 | 1878 | Yes |
| LQDLVDKLQAK             | R | V | 95.00% | 55  |                                  | 424.2524  | 3 | 3.4 | 1868 | 1878 | Yes |
| LQNEVEDLMIDVER          | R | T | 95.00% | 122 | M9: Oxidation                    | 859.9229  | 2 | 6.3 | 1425 | 1438 | No  |
| LQNEVEDLMIDVER          | R | T | 95.00% | 86  | M9: Oxidation                    | 573.6165  | 3 | 3.8 | 1425 | 1438 | No  |
| LQNEVEDLMIDVER          | R | T | 95.00% | 115 |                                  | 851.9251  | 2 | 5.9 | 1425 | 1438 | No  |
| LQNEVEDLMIDVER          | R | T | 95.00% | 75  |                                  | 568.2850  | 3 | 4.2 | 1425 | 1438 | No  |
| LQQFFNHMFVLEQEEYK       | K | K | 95.00% | 58  | M9: Oxidation                    | 795.0480  | 3 | 4.4 | 488  | 505  | Yes |
| LQQFFNHMFVLEQEEYK       | K | K | 95.00% | 35  | M9: Oxidation                    | 596.5412  | 4 | 9.8 | 488  | 505  | Yes |
| LQQFFNHMFVLEQEEYK       | K | K | 95.00% | 43  |                                  | 789.7178  | 3 | 6.2 | 488  | 505  | Yes |
| LQQFFNHMFVLEQEEYK       | K | K | 95.00% | 42  |                                  | 592.5402  | 4 | 6.1 | 488  | 505  | Yes |
| LQQFFNHMFVLEQEEYK       | K | E | 95.00% | 68  | M9: Oxidation                    | 1256.1180 | 2 | 5.7 | 488  | 506  | Yes |
| LQQFFNHMFVLEQEEYK       | K | E | 95.00% | 51  | M9: Oxidation                    | 837.7500  | 3 | 8.6 | 488  | 506  | Yes |
| LQQFFNHMFVLEQEEYK       | K | E | 95.00% | 103 |                                  | 1248.1230 | 2 | 8.3 | 488  | 506  | Yes |
| LQQFFNHMFVLEQEEYK       | K | E | 95.00% | 57  |                                  | 832.4158  | 3 | 5.6 | 488  | 506  | Yes |
| LQQFFNHMFVLEQEEYK       | K | E | 95.00% | 42  |                                  | 499.8525  | 5 | 5.4 | 488  | 506  | Yes |
| LOTESGEYSR              | R | Q | 95.00% | 58  |                                  | 585.2775  | 2 | 2.8 | 1284 | 1293 | No  |
| LTGAVMHYGNMK            | K | F | 95.00% | 72  | M11: Oxidation                   | 669.3234  | 2 | 3.3 | 355  | 366  | Yes |
| LTGAVMHYGNMK            | K | F | 95.00% | 75  | M6: Oxidation                    | 669.3235  | 2 | 3.5 | 355  | 366  | Yes |
| LTGAVMHYGNMK            | K | F | 95.00% | 62  | M6: Oxidation,<br>M6: Oxidation, | 677.3207  | 2 | 3.1 | 355  | 366  | Yes |
| LTGAVMHYGNMK            | K | F | 95.00% | 62  | M11: Oxidation                   | 677.3207  | 2 | 3.1 | 355  | 366  | Yes |
| LTGAVMHYGNMK            | K | F | 95.00% | 61  |                                  | 661.3256  | 2 | 2.7 | 355  | 366  | Yes |
| LYEQHLGK                | K | S | 95.00% | 47  |                                  | 494.2697  | 2 | 5.2 | 555  | 562  | No  |
| MEGDLNEMEIQLNHANR       | K | M | 95.00% | 108 | M1: Oxidation                    | 1015.4620 | 2 | 4.8 | 1622 | 1638 | Yes |
| MEGDLNEMEIQLNHANR       | K | M | 95.00% | 73  | M1: Oxidation                    | 677.3097  | 3 | 3.1 | 1622 | 1638 | Yes |
| MEGDLNEMEIQLNHANR       | K | M | 95.00% | 98  | M1: Oxidation                    | 1023.4620 | 2 | 6.9 | 1622 | 1638 | Yes |
| MEGDLNEMEIQLNHANR       | K | M | 95.00% | 71  | M1: Oxidation                    | 682.6416  | 3 | 3.5 | 1622 | 1638 | Yes |
| MEGDLNEMEIQLNHANR       | K | M | 95.00% | 98  | M1: Oxidation, M8:<br>Oxidation  | 1023.4620 | 2 | 6.9 | 1622 | 1638 | Yes |
| MEGDLNEMEIQLNHANR       | K | M | 95.00% | 71  | M1: Oxidation, M8:<br>Oxidation  | 682.6416  | 3 | 3.5 | 1622 | 1638 | Yes |
| MEGDLNEMEIQLNHANR       | K | M | 95.00% | 90  | M8: Oxidation                    | 1015.4650 | 2 | 7.0 | 1622 | 1638 | Yes |
| MEGDLNEMEIQLNHANR       | K | M | 95.00% | 49  | M8: Oxidation                    | 677.3115  | 3 | 5.7 | 1622 | 1638 | Yes |
| MEGDLNEMEIQLNHANR       | K | M | 95.00% | 124 |                                  | 1007.4680 | 2 | 8.1 | 1622 | 1638 | Yes |
| MEGDLNEMEIQLNHANR       | K | M | 95.00% | 77  |                                  | 671.9785  | 3 | 3.8 | 1622 | 1638 | Yes |
| MEIDDLASNMETVSK         | K | A | 95.00% | 141 | M1: Oxidation                    | 849.8865  | 2 | 5.0 | 1230 | 1244 | No  |
| MEIDDLASNMETVSK         | K | A | 95.00% | 133 | M1: Oxidation,<br>M1: Oxidation, | 857.8880  | 2 | 9.7 | 1230 | 1244 | No  |
| MEIDDLASNMETVSK         | K | A | 95.00% | 133 | M10: Oxidation                   | 857.8880  | 2 | 9.7 | 1230 | 1244 | No  |
| MEIDDLASNMETVSK         | K | A | 95.00% | 119 | M10: Oxidation                   | 849.8866  | 2 | 5.1 | 1230 | 1244 | No  |
| MEIDDLASNMETVSK         | K | A | 95.00% | 136 |                                  | 841.8904  | 2 | 6.6 | 1230 | 1244 | No  |
| MFLWMVTR                | K | I | 95.00% | 43  | M1: Oxidation                    | 550.2784  | 2 | 5.2 | 438  | 445  | Yes |
| MFLWMVTR                | K | I | 95.00% | 55  | M1: Oxidation                    | 558.2754  | 2 | 4.5 | 438  | 445  | Yes |
| MFLWMVTR                | K | I | 95.00% | 55  | M1: Oxidation, M5:<br>Oxidation  | 558.2754  | 2 | 4.5 | 438  | 445  | Yes |
| MFLWMVTR                | K | I | 95.00% | 50  | M5: Oxidation                    | 550.2784  | 2 | 5.2 | 438  | 445  | Yes |
| MFLWMVTR                | K | I | 95.00% | 47  |                                  | 542.2820  | 2 | 7.2 | 438  | 445  | Yes |
| MQGTLEDQIISANPLLEAFGNAK | K | T | 95.00% | 129 | M1: Oxidation                    | 1238.6320 | 2 | 6.9 | 215  | 237  | Yes |
| MQGTLEDQIISANPLLEAFGNAK | K | T | 95.00% | 107 | M1: Oxidation                    | 826.0911  | 3 | 7.3 | 215  | 237  | Yes |
| MVTLMQEK                | K | N | 95.00% | 47  | M1: Oxidation, M5:<br>Oxidation  | 506.2481  | 2 | 2.7 | 881  | 888  | No  |
| MVTLMQEK                | K | N | 95.00% | 48  | M5: Oxidation                    | 498.2505  | 2 | 2.5 | 881  | 888  | No  |
| NAYEESLDQLETLK          | K | R | 95.00% | 111 |                                  | 826.9099  | 2 | 6.0 | 1490 | 1503 | Yes |
| NAYEESLDQLETLK          | K | R | 95.00% | 61  |                                  | 551.6096  | 3 | 6.6 | 1490 | 1503 | Yes |
| NAYEESLDQLETLK          | K | E | 95.00% | 138 |                                  | 904.9635  | 2 | 8.8 | 1490 | 1504 | Yes |
| NAYEESLDQLETLK          | K | E | 95.00% | 53  |                                  | 603.6429  | 3 | 5.5 | 1490 | 1504 | Yes |
| NDLQLQVQAEADSLADAER     | K | C | 95.00% | 164 |                                  | 1108.0340 | 2 | 5.5 | 889  | 908  | No  |
| NDLQLQVQAEADSLADAER     | K | C | 95.00% | 101 |                                  | 739.0232  | 3 | 2.8 | 889  | 908  | No  |
| NFDKILAEWK              | R | Q | 95.00% | 40  |                                  | 632.3444  | 2 | 5.5 | 1452 | 1461 | Yes |

|                                |   |   |        |     |                                                    |           |   |     |      |      |     |
|--------------------------------|---|---|--------|-----|----------------------------------------------------|-----------|---|-----|------|------|-----|
| NFDKILAEWK                     | R | Q | 95.00% | 30  |                                                    | 421.8982  | 3 | 4.0 | 1452 | 1461 | Yes |
| NKDPLNETVVGLYQK                | K | S | 95.00% | 121 |                                                    | 859.4654  | 2 | 6.0 | 600  | 614  | Yes |
| NKDPLNETVVGLYQK                | K | S | 95.00% | 75  |                                                    | 573.3107  | 3 | 2.1 | 600  | 614  | Yes |
| NLQQEISDLTEQIAEGGK             | K | R | 95.00% | 163 |                                                    | 987.0017  | 2 | 6.4 | 1508 | 1525 | Yes |
| NLQQEISDLTEQIAEGGK             | K | R | 95.00% | 98  |                                                    | 658.3360  | 3 | 4.8 | 1508 | 1525 | Yes |
| NLQQEISDLTEQIAEGGKR            | K | I | 95.00% | 145 |                                                    | 1065.0560 | 2 | 9.5 | 1508 | 1526 | Yes |
| NLQQEISDLTEQIAEGGKR            | K | I | 95.00% | 53  |                                                    | 710.3688  | 3 | 3.2 | 1508 | 1526 | Yes |
| NLQQEISDLTEQIAEGGKR            | K | I | 95.00% | 75  |                                                    | 533.0291  | 4 | 4.1 | 1508 | 1526 | Yes |
| NLTEEMAGLDETIK                 | K | L | 95.00% | 124 | M6: Oxidation                                      | 825.9053  | 2 | 7.8 | 981  | 995  | Yes |
| NLTEEMAGLDETIK                 | K | L | 95.00% | 71  | M6: Oxidation                                      | 550.9387  | 3 | 6.4 | 981  | 995  | Yes |
| NLTEEMAGLDETIK                 | K | L | 95.00% | 131 |                                                    | 817.9079  | 2 | 7.9 | 981  | 995  | Yes |
| NLTEEMAGLDETIK                 | K | L | 95.00% | 77  |                                                    | 545.6058  | 3 | 4.2 | 981  | 995  | Yes |
| NTQAILKDTQLHLDDALR             | R | S | 95.00% | 51  |                                                    | 689.0440  | 3 | 5.7 | 1649 | 1666 | No  |
| QAEAEAEQSNVNLK                 | R | F | 95.00% | 117 |                                                    | 838.3944  | 2 | 2.2 | 1885 | 1899 | No  |
| QAEAEAEQSNVNLK                 | R | F | 95.00% | 64  |                                                    | 559.2686  | 3 | 7.6 | 1885 | 1899 | No  |
| QAFTQQIEELK                    | K | R | 95.00% | 37  |                                                    | 667.8544  | 2 | 3.8 | 1310 | 1320 | Yes |
| QAFTQQIEELKR                   | K | Q | 95.00% | 90  |                                                    | 745.9052  | 2 | 3.8 | 1310 | 1321 | Yes |
| QAFTQQIEELKR                   | K | Q | 95.00% | 61  |                                                    | 497.6067  | 3 | 5.1 | 1310 | 1321 | Yes |
| QEAPPHIFSISDNAYQFMLTDR         | R | E | 95.00% | 103 | M18: Oxidation                                     | 866.0826  | 3 | 7.0 | 149  | 170  | Yes |
| QEAPPHIFSISDNAYQFMLTDR         | R | E | 95.00% | 81  |                                                    | 860.7453  | 3 | 0.4 | 149  | 170  | Yes |
| QKQREEQAEPDGTEVADK             | K | A | 95.00% | 33  |                                                    | 686.6686  | 3 | 7.7 | 369  | 386  | Yes |
| QLDEKDTLVLSQLR                 | R | G | 95.00% | 107 |                                                    | 816.4401  | 2 | 7.3 | 1294 | 1307 | No  |
| QLDEKDTLVLSQLSR                | R | G | 95.00% | 66  |                                                    | 544.6294  | 3 | 7.3 | 1294 | 1307 | No  |
| QLEEEIK                        | R | A | 95.00% | 50  |                                                    | 444.7393  | 2 | 3.2 | 1322 | 1328 | Yes |
| QREEQAEPDGTEVADK               | K | A | 95.00% | 104 |                                                    | 901.4207  | 2 | 7.2 | 371  | 386  | Yes |
| QREEQAEPDGTEVADK               | K | A | 95.00% | 62  |                                                    | 601.2809  | 3 | 3.6 | 371  | 386  | Yes |
| QRLQNEVEDLMIDVER               | K | T | 95.00% | 44  | M11: Oxidation                                     | 668.3357  | 3 | 2.3 | 1423 | 1438 | No  |
| QRLQNEVEDLMIDVER               | K | T | 95.00% | 64  |                                                    | 663.0079  | 3 | 8.0 | 1423 | 1438 | No  |
| QVQEKSSELQAALAEAEASLEH<br>EEGK | K | I | 95.00% | 94  |                                                    | 971.1387  | 3 | 6.7 | 1536 | 1561 | No  |
| QVQEKSSELQAALAEAEASLEH<br>EEGK | K | I | 95.00% | 60  |                                                    | 728.6054  | 4 | 6.0 | 1536 | 1561 | No  |
| RANLLQAEIEELR                  | R | A | 95.00% | 86  |                                                    | 777.9383  | 2 | 5.3 | 1681 | 1693 | Yes |
| RANLLQAEIEELR                  | R | A | 95.00% | 90  |                                                    | 518.9605  | 3 | 3.5 | 1681 | 1693 | Yes |
| RANLLQAEIEELRATLEQTER          | R | S | 95.00% | 41  |                                                    | 828.4529  | 3 | 8.5 | 1681 | 1701 | Yes |
| RANLLQAEIEELRATLEQTER          | R | S | 95.00% | 79  |                                                    | 621.5908  | 4 | 7.2 | 1681 | 1701 | Yes |
| RDLEEATLQHEATAATLR             | R | K | 95.00% | 113 |                                                    | 1013.0270 | 2 | 4.5 | 1180 | 1197 | Yes |
| RDLEEATLQHEATAATLR             | R | K | 95.00% | 81  |                                                    | 675.6859  | 3 | 2.7 | 1180 | 1197 | Yes |
| RDLEEATLQHEATAATLR             | R | K | 95.00% | 61  |                                                    | 507.0161  | 4 | 2.1 | 1180 | 1197 | Yes |
| RDLEEATLQHEATAATLRK            | R | K | 95.00% | 41  |                                                    | 539.0399  | 4 | 2.2 | 1180 | 1198 | Yes |
| RIQHELEEAEEER                  | R | A | 95.00% | 76  |                                                    | 769.8843  | 2 | 2.9 | 1902 | 1913 | No  |
| RIQHELEEAEEER                  | R | A | 95.00% | 60  |                                                    | 513.5924  | 3 | 3.2 | 1902 | 1913 | No  |
| RIQHELEEAEEERADIAESQVNK        | R | L | 95.00% | 87  |                                                    | 865.4377  | 3 | 6.2 | 1902 | 1923 | No  |
| RIQHELEEAEEERADIAESQVNK        | R | L | 95.00% | 82  |                                                    | 649.3293  | 4 | 4.8 | 1902 | 1923 | No  |
| RQAEAEAEQSNVNLK                | K | F | 95.00% | 43  |                                                    | 611.3019  | 3 | 6.5 | 1884 | 1899 | No  |
| RQEAPPHIFSISDNAYQFMLTDR        | K | E | 95.00% | 106 | M19: Oxidation                                     | 918.1165  | 3 | 6.7 | 148  | 170  | Yes |
| RQEAPPHIFSISDNAYQFMLTDR        | K | E | 95.00% | 34  | M19: Oxidation                                     | 688.8396  | 4 | 7.2 | 148  | 170  | Yes |
| RQEAPPHIFSISDNAYQFMLTDR        | K | E | 95.00% | 114 |                                                    | 912.7863  | 3 | 8.4 | 148  | 170  | Yes |
| RQEAPPHIFSISDNAYQFMLTDR        | K | E | 95.00% | 70  | M19: Oxidation                                     | 1060.0320 | 4 | 9.5 | 148  | 185  | Yes |
| ENQSILITGESGAGK                | K | T | 95.00% | 70  |                                                    | 848.4809  | 2 | 6.2 | 191  | 205  | Yes |
| RVIQYFATIAVTGEK                | K | K | 95.00% | 106 |                                                    | 565.9888  | 3 | 4.3 | 191  | 205  | Yes |
| RVIQYFATIAVTGEK                | K | K | 95.00% | 71  |                                                    | 682.9747  | 3 | 4.1 | 846  | 862  | No  |
| SAETEKEMANMKEEFEK              | K | T | 95.00% | 40  | M8: Oxidation                                      | 1031.9570 | 2 | 5.8 | 846  | 862  | No  |
| SAETEKEMANMKEEFEK              | K | T | 95.00% | 57  | M8: Oxidation,<br>M8: Oxidation,<br>M11: Oxidation | 1031.9570 | 2 | 5.6 | 846  | 862  | No  |
| SAETEKEMANMKEEFEK              | K | T | 95.00% | 40  | M11: Oxidation                                     | 688.3063  | 3 | 4.1 | 846  | 862  | No  |
| SAETEKEMANMKEEFEK              | K | T | 95.00% | 57  |                                                    | 1015.9640 | 2 | 7.6 | 846  | 862  | No  |
| SAETEKEMANMKEEFEK              | K | T | 95.00% | 34  |                                                    | 677.6425  | 3 | 3.2 | 846  | 862  | No  |
| SALAHALQSSR                    | K | H | 95.00% | 84  |                                                    | 570.8121  | 2 | 3.4 | 1331 | 1341 | No  |
| SELQAALAEAEASLEHEEGK           | K | I | 95.00% | 136 |                                                    | 1085.5170 | 2 | 4.6 | 1542 | 1561 | No  |
| SELQAALAEAEASLEHEEGK           | K | I | 95.00% | 68  |                                                    | 724.0146  | 3 | 6.1 | 1542 | 1561 | No  |
| SEMKMEIDDLASNMETVSK            | K | A | 95.00% | 47  | M3: Oxidation, M5:<br>Oxidation                    | 730.6620  | 3 | 4.0 | 1226 | 1244 | No  |

|                          |   |   |        |     |                | M3: Oxidation, M5: |   |     |      |      |     |
|--------------------------|---|---|--------|-----|----------------|--------------------|---|-----|------|------|-----|
|                          |   |   |        |     |                | Oxidation, M14:    |   |     |      |      |     |
|                          |   |   |        |     |                | Oxidation          |   |     |      |      |     |
| SEMKMEIDDLASNMETVSK      | K | A | 95.00% | 46  |                | 735.9954           | 3 | 6.3 | 1226 | 1244 | No  |
| SLSTELFK                 | R | I | 95.00% | 34  |                | 924.5075           | 1 | 3.4 | 1480 | 1487 | No  |
| SLSTELFK                 | R | I | 95.00% | 68  |                | 462.7583           | 2 | 4.8 | 1480 | 1487 | No  |
| SQEDLKEQLAMVER           | R | R | 95.00% | 98  |                | 846.4202           | 2 | 3.0 | 1667 | 1680 | Yes |
| SQEDLKEQLAMVER           | R | R | 95.00% | 65  | M11: Oxidation | 564.6167           | 3 | 4.1 | 1667 | 1680 | Yes |
| SQEDLKEQLAMVER           | R | R | 95.00% | 117 |                | 838.4244           | 2 | 5.0 | 1667 | 1680 | Yes |
| SQEDLKEQLAMVER           | R | R | 95.00% | 65  |                | 559.2847           | 3 | 3.5 | 1667 | 1680 | Yes |
| STHPHFVR                 | R | C | 95.00% | 32  |                | 490.7590           | 2 | 3.7 | 668  | 675  | Yes |
| SYHIFYQIMSNK             | R | K | 95.00% | 85  | M9: Oxidation  | 773.8758           | 2 | 4.9 | 285  | 296  | No  |
| SYHIFYQIMSNK             | R | K | 95.00% | 35  | M9: Oxidation  | 516.2546           | 3 | 7.7 | 285  | 296  | No  |
| SYHIFYQIMSNK             | R | K | 95.00% | 83  |                | 765.8785           | 2 | 5.1 | 285  | 296  | No  |
| TEAGATVTVK               | K | D | 95.00% | 50  |                | 488.7727           | 2 | 6.1 | 64   | 73   | No  |
| TEAGATVTVKDDQVFPMPNPK    | K | Y | 95.00% | 76  | M17: Oxidation | 1131.0660          | 2 | 4.9 | 64   | 84   | No  |
| TEAGATVTVKDDQVFPMPNPK    | K | Y | 95.00% | 84  | M17: Oxidation | 754.3827           | 3 | 8.9 | 64   | 84   | No  |
| TEAGATVTVKDDQVFPMPNPK    | K | Y | 95.00% | 39  |                | 749.0489           | 3 | 6.0 | 64   | 84   | No  |
| TEAGATVTVKDDQVFPMPNPKYDK | K | I | 95.00% | 71  | M17: Oxidation | 889.7745           | 3 | 3.8 | 64   | 87   | No  |
| TEAGATVTVKDDQVFPMPNPKYDK | K | I | 95.00% | 55  |                | 884.4412           | 3 | 1.8 | 64   | 87   | No  |
| TEELEEK                  | R | K | 95.00% | 33  |                | 948.4558           | 1 | 3.3 | 1387 | 1394 | Yes |
| TEELEEK                  | R | K | 95.00% | 39  |                | 474.7330           | 2 | 5.9 | 1387 | 1394 | Yes |
| TEELEAKK                 | R | K | 95.00% | 40  |                | 538.7797           | 2 | 3.5 | 1387 | 1395 | Yes |
| TKYETDAIQR               | R | T | 95.00% | 69  |                | 612.8171           | 2 | 3.2 | 1377 | 1386 | Yes |
| TKYETDAIQR               | R | T | 95.00% | 55  |                | 408.8806           | 3 | 3.1 | 1377 | 1386 | Yes |
| TKYETDAIQRTEELEEK        | R | K | 95.00% | 74  |                | 1077.5420          | 2 | 8.6 | 1377 | 1394 | Yes |
| TKYETDAIQRTEELEEK        | R | K | 95.00% | 38  |                | 718.6949           | 3 | 5.7 | 1377 | 1394 | Yes |
| TKYETDAIQRTEELEEK        | R | K | 95.00% | 31  |                | 539.2729           | 4 | 5.3 | 1377 | 1394 | Yes |
| TLALLFVGATGAEAEAGGGK     | K | K | 95.00% | 171 |                | 916.9958           | 2 | 4.2 | 619  | 638  | No  |
| TLALLFVGATGAEAEAGGGK     | K | K | 95.00% | 102 |                | 611.6674           | 3 | 5.7 | 619  | 638  | No  |
| TLALLFVGATGAEAEAGGGK     | K | G | 95.00% | 122 |                | 981.0455           | 2 | 6.2 | 619  | 639  | No  |
| TLALLFVGATGAEAEAGGGK     | K | G | 95.00% | 51  |                | 654.3675           | 3 | 8.1 | 619  | 639  | No  |
| TNAACAALDKK              | R | Q | 95.00% | 39  |                | 553.2895           | 2 | 3.1 | 1439 | 1449 | Yes |
| TPGAMEHELVLHQLR          | K | C | 95.00% | 68  | M5: Oxidation  | 873.9575           | 2 | 6.3 | 684  | 698  | Yes |
| TPGAMEHELVLHQLR          | K | C | 95.00% | 75  | M5: Oxidation  | 582.9732           | 3 | 4.5 | 684  | 698  | Yes |
| TPGAMEHELVLHQLR          | K | C | 95.00% | 35  | M5: Oxidation  | 437.4808           | 4 | 2.1 | 684  | 698  | Yes |
| TPGAMEHELVLHQLR          | K | C | 95.00% | 109 |                | 865.9571           | 2 | 2.9 | 684  | 698  | Yes |
| TPGAMEHELVLHQLR          | K | C | 95.00% | 77  |                | 577.6414           | 3 | 4.2 | 684  | 698  | Yes |
| TPGAMEHELVLHQLR          | K | C | 95.00% | 45  |                | 433.4824           | 4 | 2.8 | 684  | 698  | Yes |
| TSVVFVDPK                | K | E | 95.00% | 29  |                | 991.5532           | 1 | 6.8 | 36   | 44   | No  |
| TSVVFVDPK                | K | E | 95.00% | 72  |                | 496.2798           | 2 | 5.5 | 36   | 44   | No  |
| TVNTRKVIQYFATIAVTGEK     | K | K | 95.00% | 35  |                | 747.0939           | 3 | 9.4 | 186  | 205  | Yes |
| VGNEYVTK                 | K | G | 95.00% | 69  |                | 455.2391           | 2 | 2.3 | 409  | 416  | Yes |
| VIQYFATIAVTGEK           | R | K | 95.00% | 132 |                | 770.4273           | 2 | 2.9 | 192  | 205  | Yes |
| VIQYFATIAVTGEK           | R | K | 95.00% | 82  |                | 513.9557           | 3 | 6.0 | 192  | 205  | Yes |
| VKELTYQTEEDRK            | K | K | 95.00% | 71  |                | 755.8765           | 2 | 4.1 | 1851 | 1862 | No  |
| VKELTYQTEEDRK            | K | N | 95.00% | 86  |                | 819.9239           | 2 | 3.7 | 1851 | 1863 | No  |
| VKELTYQTEEDRK            | K | N | 95.00% | 58  |                | 546.9517           | 3 | 3.3 | 1851 | 1863 | No  |
| VKELTYQTEEDRK            | K | N | 95.00% | 40  |                | 410.4650           | 4 | 1.6 | 1851 | 1863 | No  |
| VKNLTEEMAGLDETIK         | K | L | 95.00% | 107 | M8: Oxidation  | 939.4888           | 2 | 8.8 | 979  | 995  | Yes |
| VKNLTEEMAGLDETIK         | K | L | 95.00% | 57  | M8: Oxidation  | 626.6605           | 3 | 6.7 | 979  | 995  | Yes |
| VKNLTEEMAGLDETIK         | K | L | 95.00% | 140 |                | 931.4891           | 2 | 6.4 | 979  | 995  | Yes |
| VKNLTEEMAGLDETIK         | K | L | 95.00% | 63  |                | 621.3273           | 3 | 4.2 | 979  | 995  | Yes |
| VKVGNEYVTK               | R | G | 95.00% | 59  |                | 568.8224           | 2 | 4.7 | 407  | 416  | Yes |
| VLNASAIPEGQFIDSK         | K | K | 95.00% | 115 |                | 844.9546           | 2 | 9.1 | 728  | 743  | Yes |
| VLNASAIPEGQFIDSK         | K | K | 95.00% | 76  |                | 563.6365           | 3 | 4.6 | 728  | 743  | Yes |
| VLNASAIPEGQFIDSKK        | K | A | 95.00% | 88  |                | 909.0018           | 2 | 8.1 | 728  | 744  | Yes |
| VLNASAIPEGQFIDSKK        | K | A | 95.00% | 54  |                | 606.3343           | 3 | 3.4 | 728  | 744  | Yes |
| VQLLHTQNTSLINTK          | R | K | 95.00% | 116 |                | 855.4858           | 2 | 5.1 | 1717 | 1731 | Yes |
| VQLLHTQNTSLINTK          | R | K | 95.00% | 74  |                | 570.6585           | 3 | 2.8 | 1717 | 1731 | Yes |
| VQLLHTQNTSLINTK          | R | K | 95.00% | 102 |                | 919.5307           | 2 | 1.9 | 1717 | 1732 | Yes |
| VQLLHTQNTSLINTK          | R | K | 95.00% | 62  |                | 613.3572           | 3 | 3.3 | 1717 | 1732 | Yes |
| VQLLHTQNTSLINTK          | R | K | 95.00% | 34  |                | 460.2692           | 4 | 1.7 | 1717 | 1732 | Yes |
| VRELEGEVESEQK            | R | R | 95.00% | 79  |                | 766.3853           | 2 | 1.5 | 1823 | 1835 | Yes |
| VRELEGEVESEQK            | R | R | 95.00% | 42  |                | 511.2623           | 3 | 7.0 | 1823 | 1835 | Yes |
| VRELEGEVESEQKR           | R | N | 95.00% | 95  |                | 844.4380           | 2 | 3.9 | 1823 | 1836 | Yes |

|                        |   |   |        |     |                                              |           |   |      |      |      |     |
|------------------------|---|---|--------|-----|----------------------------------------------|-----------|---|------|------|------|-----|
| VRELEGEVESEQKR         | R | N | 95.00% | 87  |                                              | 563.2943  | 3 | 3.4  | 1823 | 1836 | Yes |
| VRELEGEVESEQKR         | R | N | 95.00% | 57  |                                              | 422.7220  | 4 | 1.9  | 1823 | 1836 | Yes |
| YDKIEDMAMMTHLHEPAVLYNL | K | E | 95.00% | 39  | M10: Oxidation                               | 695.3429  | 4 | 6.3  | 85   | 107  | Yes |
| YDKIEDMAMMTHLHEPAVLYNL | K | E | 95.00% | 51  | M7: Oxidation                                | 695.3415  | 4 | 4.3  | 85   | 107  | Yes |
| YDKIEDMAMMTHLHEPAVLYNL | K | E | 95.00% | 44  | M7: Oxidation                                | 932.1197  | 3 | 6.5  | 85   | 107  | Yes |
| YDKIEDMAMMTHLHEPAVLYNL | K | E | 95.00% | 41  | M7: Oxidation                                | 699.3425  | 4 | 7.5  | 85   | 107  | Yes |
| YDKIEDMAMMTHLHEPAVLYNL | K | E | 95.00% | 38  | M7: Oxidation                                | 703.3388  | 4 | 4.1  | 85   | 107  | Yes |
| YDKIEDMAMMTHLHEPAVLYNL | K | E | 95.00% | 45  | M10: Oxidation                               | 932.1219  | 3 | 8.8  | 85   | 107  | Yes |
| YDKIEDMAMMTHLHEPAVLYNL | K | E | 95.00% | 47  | M10: Oxidation                               | 699.3423  | 4 | 7.3  | 85   | 107  | Yes |
| YDKIEDMAMMTHLHEPAVLYNL | K | E | 95.00% | 44  | M7: Oxidation, M9: Oxidation                 | 932.1197  | 3 | 6.5  | 85   | 107  | Yes |
| YDKIEDMAMMTHLHEPAVLYNL | K | E | 95.00% | 37  | M7: Oxidation, M9: Oxidation                 | 699.3398  | 4 | 3.7  | 85   | 107  | Yes |
| YDKIEDMAMMTHLHEPAVLYNL | K | E | 95.00% | 38  | M7: Oxidation, M9: Oxidation, M10: Oxidation | 703.3388  | 4 | 4.1  | 85   | 107  | Yes |
| YDKIEDMAMMTHLHEPAVLYNL | K | E | 95.00% | 38  | M9: Oxidation                                | 695.3418  | 4 | 4.7  | 85   | 107  | Yes |
| YDKIEDMAMMTHLHEPAVLYNL | K | E | 95.00% | 44  | M9: Oxidation                                | 932.1201  | 3 | 6.8  | 85   | 107  | Yes |
| YDKIEDMAMMTHLHEPAVLYNL | K | E | 95.00% | 42  | M9: Oxidation                                | 699.3422  | 4 | 7.2  | 85   | 107  | Yes |
| YDKIEDMAMMTHLHEPAVLYNL | K | E | 95.00% | 44  | M9: Oxidation, M10: Oxidation                | 932.1201  | 3 | 6.8  | 85   | 107  | Yes |
| YDKIEDMAMMTHLHEPAVLYNL | K | E | 95.00% | 54  | M9: Oxidation, M10: Oxidation                | 699.3412  | 4 | 5.7  | 85   | 107  | Yes |
| YDKIEDMAMMTHLHEPAVLYNL | K | E | 95.00% | 48  |                                              | 691.3441  | 4 | 6.3  | 85   | 107  | Yes |
| YETDAIQR               | K | T | 95.00% | 34  |                                              | 498.2464  | 2 | 5.1  | 1379 | 1386 | Yes |
| YKVLNASAIPEGQFIDSK     | R | K | 95.00% | 110 |                                              | 990.5358  | 2 | 9.8  | 726  | 743  | Yes |
| YKVLNASAIPEGQFIDSK     | R | K | 95.00% | 53  |                                              | 660.6901  | 3 | 5.3  | 726  | 743  | Yes |
| YKVLNASAIPEGQFIDSKK    | R | A | 95.00% | 82  |                                              | 703.3906  | 3 | 8.1  | 726  | 744  | Yes |
| YKVLNASAIPEGQFIDSKK    | R | A | 95.00% | 28  |                                              | 527.7926  | 4 | 3.7  | 726  | 744  | Yes |
| ADIAESQVNK             | R | L | 95.00% | 52  |                                              | 1074.5510 | 1 | 7.4  | 1910 | 1919 | Yes |
| ADIAESQVNK             | R | L | 95.00% | 81  |                                              | 537.7761  | 2 | 1.1  | 1910 | 1919 | Yes |
| ADIAESQVNKLR           | R | A | 95.00% | 34  |                                              | 448.5825  | 3 | 2.7  | 1910 | 1921 | Yes |
| AERDYHIFYQILSNK        | K | K | 95.00% | 79  |                                              | 948.9874  | 2 | 3.2  | 279  | 293  | No  |
| AERDYHIFYQILSNK        | K | K | 95.00% | 45  |                                              | 632.9952  | 3 | 4.8  | 279  | 293  | No  |
| AGLLGLEEMR             | K | D | 95.00% | 88  | M10: Oxidation                               | 609.3355  | 2 | 5.4  | 767  | 777  | Yes |
| AGLLGLEEMR             | K | D | 95.00% | 58  | M10: Oxidation                               | 406.5597  | 3 | 5.7  | 767  | 777  | Yes |
| AGLLGLEEMR             | K | D | 95.00% | 62  |                                              | 1201.6510 | 1 | -9.1 | 767  | 777  | Yes |
| AGLLGLEEMR             | K | D | 95.00% | 94  |                                              | 601.3371  | 2 | 3.9  | 767  | 777  | Yes |
| AGLLGLEEMRDER          | K | L | 95.00% | 50  | M10: Oxidation                               | 809.4238  | 2 | 7.7  | 767  | 780  | Yes |
| AGLLGLEEMRDER          | K | L | 95.00% | 68  | M10: Oxidation                               | 539.9509  | 3 | 6.0  | 767  | 780  | Yes |
| AGLLGLEEMRDER          | K | L | 95.00% | 46  |                                              | 801.4236  | 2 | 4.3  | 767  | 780  | Yes |
| AGLLGLEEMRDER          | K | L | 95.00% | 54  |                                              | 534.6177  | 3 | 3.2  | 767  | 780  | Yes |
| AITDAAMMAEELK          | K | K | 95.00% | 86  | M7: Oxidation, M8: Oxidation                 | 713.3404  | 2 | 8.6  | 1758 | 1770 | Yes |
| AITDAAMMAEELK          | K | K | 95.00% | 45  | M7: Oxidation, M8: Oxidation                 | 475.8937  | 3 | 3.3  | 1758 | 1770 | Yes |
| AITDAAMMAEELKK         | K | E | 95.00% | 102 | M7: Oxidation                                | 769.3866  | 2 | 3.0  | 1758 | 1771 | Yes |
| AITDAAMMAEELKK         | K | E | 95.00% | 44  | M7: Oxidation                                | 513.2606  | 3 | 3.4  | 1758 | 1771 | Yes |
| AITDAAMMAEELKK         | K | E | 95.00% | 83  | M7: Oxidation                                | 777.3852  | 2 | 4.5  | 1758 | 1771 | Yes |
| AITDAAMMAEELKK         | K | E | 95.00% | 52  | M7: Oxidation                                | 518.5913  | 3 | 1.7  | 1758 | 1771 | Yes |
| AITDAAMMAEELKK         | K | E | 95.00% | 83  | M7: Oxidation, M8: Oxidation                 | 777.3852  | 2 | 4.5  | 1758 | 1771 | Yes |
| AITDAAMMAEELKK         | K | E | 95.00% | 52  | M7: Oxidation, M8: Oxidation                 | 518.5913  | 3 | 1.7  | 1758 | 1771 | Yes |
| AITDAAMMAEELKK         | K | E | 95.00% | 97  | M8: Oxidation                                | 769.3875  | 2 | 4.2  | 1758 | 1771 | Yes |
| AITDAAMMAEELKK         | K | E | 95.00% | 52  | M8: Oxidation                                | 513.2598  | 3 | 1.9  | 1758 | 1771 | Yes |
| AITDAAMMAEELKK         | K | E | 95.00% | 111 |                                              | 761.3883  | 2 | 1.9  | 1758 | 1771 | Yes |

|                         |   |   |        |     |                              |           |   |      |      |      |     |
|-------------------------|---|---|--------|-----|------------------------------|-----------|---|------|------|------|-----|
| AITDAAMMAEELKK          | K | E | 95.00% | 77  |                              | 507.9281  | 3 | 1.8  | 1758 | 1771 | Yes |
| AITDAAMMAEELKKEQDTSAHLE |   |   |        |     | M7: Oxidation, M8:           |           |   |      |      |      |     |
| R                       | K | M | 95.00% | 37  | Oxidation                    | 907.4404  | 3 | 6.9  | 1758 | 1781 | Yes |
| AKLQTEGELSR             | R | Q | 95.00% | 58  |                              | 673.3601  | 2 | 3.5  | 1278 | 1289 | No  |
| ALQEAHQALDDLQAEEDK      | K | V | 95.00% | 48  |                              | 718.0157  | 3 | 7.1  | 998  | 1016 | Yes |
| ALQEAHQALDDLQAEEDKVNT   |   |   |        |     |                              |           |   |      |      |      |     |
| LTK                     | K | A | 95.00% | 100 |                              | 936.8147  | 3 | 9.6  | 998  | 1022 | No  |
| ALQEAHQALDDLQAEEDKVNT   |   |   |        |     |                              |           |   |      |      |      |     |
| LTK                     | K | A | 95.00% | 55  |                              | 702.8597  | 4 | 5.0  | 998  | 1022 | No  |
| ANDDLKENIAIVER          | R | R | 95.00% | 120 |                              | 800.4223  | 2 | 1.5  | 1663 | 1676 | Yes |
| ANDDLKENIAIVER          | R | R | 95.00% | 75  |                              | 533.9528  | 3 | 5.3  | 1663 | 1676 | Yes |
| ANDDLKENIAIVERR         | R | N | 95.00% | 58  |                              | 878.4757  | 2 | 4.6  | 1663 | 1677 | Yes |
| ANDDLKENIAIVERR         | R | N | 95.00% | 70  |                              | 585.9875  | 3 | 6.6  | 1663 | 1677 | Yes |
| ANDDLKENIAIVERR         | R | N | 95.00% | 28  |                              | 439.7414  | 4 | 3.9  | 1663 | 1677 | Yes |
| ANSEVAQWR               | K | T | 95.00% | 51  |                              | 1060.5270 | 1 | 9.1  | 1364 | 1372 | Yes |
| ANSEVAQWR               | K | T | 95.00% | 66  |                              | 530.7642  | 2 | 2.9  | 1364 | 1372 | Yes |
| AQLEFNQIK               | R | A | 95.00% | 43  |                              | 1090.5980 | 1 | 7.5  | 1561 | 1569 | Yes |
| AQLEFNQIK               | R | A | 95.00% | 75  |                              | 545.8014  | 2 | 4.7  | 1561 | 1569 | Yes |
| AQLEFNQIKAEIER          | R | K | 95.00% | 91  |                              | 844.9600  | 2 | 8.7  | 1561 | 1574 | Yes |
| AVVEQTER                | R | S | 95.00% | 72  |                              | 466.2471  | 2 | 1.7  | 1690 | 1697 | Yes |
| DFELNALNAR              | K | I | 95.00% | 64  |                              | 1162.5970 | 1 | 9.8  | 1084 | 1093 | No  |
| DFELNALNAR              | K | I | 95.00% | 82  |                              | 581.7988  | 2 | 3.4  | 1084 | 1093 | No  |
| DIDDLLETLAK             | R | V | 95.00% | 54  |                              | 1245.6670 | 1 | 7.2  | 953  | 963  | No  |
| DIDDLLETLAK             | R | V | 95.00% | 99  |                              | 623.3293  | 2 | -5.9 | 953  | 963  | No  |
| DLEEATLQHEATAAALR       | R | K | 95.00% | 138 |                              | 919.9714  | 2 | 5.4  | 1177 | 1193 | Yes |
| DLEEATLQHEATAAALR       | R | K | 95.00% | 67  |                              | 613.6491  | 3 | 3.6  | 1177 | 1193 | Yes |
| DLEEATLQHEATAAALRK      | R | K | 95.00% | 119 |                              | 984.0176  | 2 | 3.8  | 1177 | 1194 | Yes |
| DLEEATLQHEATAAALRK      | R | K | 95.00% | 75  |                              | 656.3477  | 3 | 3.8  | 1177 | 1194 | Yes |
| DLQHRLEAEQIALK          | K | G | 95.00% | 52  |                              | 889.9805  | 2 | 7.1  | 1792 | 1806 | Yes |
| DLQHRLEAEQIALK          | K | G | 95.00% | 58  |                              | 593.6564  | 3 | 7.3  | 1792 | 1806 | Yes |
| DPLNETVGLYQK            | K | S | 95.00% | 91  |                              | 738.3958  | 2 | 6.1  | 599  | 611  | Yes |
| DQSPGKGTLEDQIIQANPALEAF |   |   |        |     |                              |           |   |      |      |      |     |
| GNAK                    | K | T | 95.00% | 89  |                              | 938.1507  | 3 | 8.7  | 208  | 234  | No  |
| DQSPGKGTLEDQIIQANPALEAF |   |   |        |     |                              |           |   |      |      |      |     |
| GNAK                    | K | T | 95.00% | 46  |                              | 703.8649  | 4 | 8.6  | 208  | 234  | No  |
| DSLLVIQWNIR             | R | A | 95.00% | 80  |                              | 678.8918  | 2 | 8.7  | 809  | 819  | No  |
| DTQIQLDDAVR             | K | A | 95.00% | 55  |                              | 1273.6480 | 1 | 6.6  | 1652 | 1662 | Yes |
| DTQIQLDDAVR             | K | A | 95.00% | 94  |                              | 637.3256  | 2 | 3.5  | 1652 | 1662 | Yes |
| DVFPDDK                 | K | Q | 95.00% | 31  |                              | 934.4548  | 1 | 2.6  | 36   | 43   | No  |
| DVFPDDKQEFVK            | K | A | 95.00% | 72  |                              | 783.3995  | 2 | 3.7  | 36   | 48   | No  |
| DVFPDDKQEFVK            | K | A | 95.00% | 37  |                              | 522.6016  | 3 | 2.5  | 36   | 48   | No  |
| DYHIFYQLSNK             | R | K | 95.00% | 81  |                              | 770.8994  | 2 | 7.1  | 282  | 293  | No  |
| DYHIFYQLSNK             | R | K | 95.00% | 45  |                              | 514.2679  | 3 | 5.3  | 282  | 293  | No  |
| EAEFQK                  | R | M | 95.00% | 32  |                              | 751.3677  | 1 | 6.7  | 1168 | 1173 | Yes |
| EALISQLTR               | K | G | 95.00% | 46  |                              | 1030.5930 | 1 | 2.7  | 1295 | 1303 | Yes |
| EALISQLTR               | K | G | 95.00% | 61  |                              | 515.8003  | 2 | 2.8  | 1295 | 1303 | Yes |
| EDQVMQQNPPK             | K | F | 95.00% | 67  | M5: Oxidation                | 665.3156  | 2 | 9.3  | 73   | 83   | No  |
| EDQVMQQNPPK             | K | F | 95.00% | 64  |                              | 657.3140  | 2 | 3.0  | 73   | 83   | No  |
| EDQVMQQNPPKFDK          | K | I | 95.00% | 73  | M5: Oxidation                | 860.4100  | 2 | 6.3  | 73   | 86   | No  |
| EDQVMQQNPPKFDK          | K | I | 95.00% | 40  | M5: Oxidation                | 573.9413  | 3 | 4.1  | 73   | 86   | No  |
| EDQVMQQNPPKFDK          | K | I | 95.00% | 81  |                              | 852.4096  | 2 | 2.9  | 73   | 86   | No  |
| EDQVMQQNPPKFDK          | K | I | 95.00% | 57  |                              | 568.6121  | 3 | 8.2  | 73   | 86   | No  |
| EEQAEPDGTTEEADKSAYLMGLN |   |   |        |     |                              |           |   |      |      |      |     |
| SADLLK                  | R | G | 95.00% | 100 | M19: Oxidation               | 1014.1410 | 3 | 4.1  | 370  | 397  | No  |
| EEQAEPDGTTEEADKSAYLMGLN |   |   |        |     |                              |           |   |      |      |      |     |
| SADLLK                  | R | G | 95.00% | 76  |                              | 1008.8120 | 3 | 7.2  | 370  | 397  | No  |
| EGGKVTAEITYGK           | R | T | 95.00% | 52  |                              | 684.8429  | 2 | 9.5  | 55   | 67   | No  |
| EKEMASMKEEFTR           | R | L | 95.00% | 67  | M4: Oxidation                | 816.3773  | 2 | 3.6  | 846  | 858  | No  |
| EKEMASMKEEFTR           | R | L | 95.00% | 43  | M4: Oxidation                | 544.5875  | 3 | 3.5  | 846  | 858  | No  |
| EKEMASMKEEFTR           | R | L | 95.00% | 65  | M4: Oxidation                | 824.3760  | 2 | 5.1  | 846  | 858  | No  |
| EKEMASMKEEFTR           | R | L | 95.00% | 45  | M4: Oxidation                | 549.9203  | 3 | 5.7  | 846  | 858  | No  |
| EKEMASMKEEFTR           | R | L | 95.00% | 37  | M4: Oxidation                | 412.6902  | 4 | 1.0  | 846  | 858  | No  |
| EKEMASMKEEFTR           | R | L | 95.00% | 65  | M4: Oxidation, M7: Oxidation | 824.3760  | 2 | 5.1  | 846  | 858  | No  |
| EKEMASMKEEFTR           | R | L | 95.00% | 45  | M4: Oxidation, M7: Oxidation | 549.9203  | 3 | 5.7  | 846  | 858  | No  |
| EKEMASMKEEFTR           | R | L | 95.00% | 37  | M4: Oxidation, M7: Oxidation | 412.6902  | 4 | 1.0  | 846  | 858  | No  |
| EKEMASMKEEFTR           | R | L | 95.00% | 67  | M7: Oxidation                | 816.3780  | 2 | 4.4  | 846  | 858  | No  |
| EKEMASMKEEFTR           | R | L | 95.00% | 39  | M7: Oxidation                | 544.5877  | 3 | 4.0  | 846  | 858  | No  |

|                         |   |   |        |     |                              |           |   |     |      |      |     |
|-------------------------|---|---|--------|-----|------------------------------|-----------|---|-----|------|------|-----|
| EKEMASMKEEFTR           | R | L | 95.00% | 77  |                              | 808.3791  | 2 | 2.7 | 846  | 858  | No  |
| EKSEFKLELDDVTSNMEQIIK   | K | A | 95.00% | 79  | M16: Oxidation               | 838.0959  | 3 | 9.1 | 1220 | 1240 | Yes |
| EKSEFKLELDDVTSNMEQIIK   | K | A | 95.00% | 33  | M16: Oxidation               | 628.8243  | 4 | 9.7 | 1220 | 1240 | Yes |
| EKSEFKLELDDVTSNMEQIIK   | K | A | 95.00% | 84  |                              | 832.7598  | 3 | 3.7 | 1220 | 1240 | Yes |
| EKSEFKLELDDVTSNMEQIIK   | K | A | 95.00% | 35  |                              | 624.8219  | 4 | 3.9 | 1220 | 1240 | Yes |
| ELEEISER                | R | L | 95.00% | 49  |                              | 1004.4910 | 1 | 0.9 | 1142 | 1149 | Yes |
| ELEEISER                | R | L | 95.00% | 42  |                              | 502.7503  | 2 | 2.7 | 1142 | 1149 | Yes |
| ELEEISERLEEAGGATSVQIEMN |   |   |        |     |                              |           |   |     |      |      |     |
| K                       |   |   |        |     |                              |           |   |     |      |      |     |
| ELEEISERLEEAGGATSVQIEMN | R | K | 95.00% | 82  | M22: Oxidation               | 893.4395  | 3 | 7.5 | 1142 | 1165 | Yes |
| K                       |   |   |        |     |                              |           |   |     |      |      |     |
| ELEEISERLEEAGGATSVQIEMN | R | K | 95.00% | 56  | M22: Oxidation               | 670.3314  | 4 | 7.1 | 1142 | 1165 | Yes |
| K                       |   |   |        |     |                              |           |   |     |      |      |     |
| ELEEISERLEEAGGATSVQIEMN | R | K | 95.00% | 69  |                              | 888.1052  | 3 | 4.4 | 1142 | 1165 | Yes |
| K                       |   |   |        |     |                              |           |   |     |      |      |     |
| ELEEISERLEEAGGATSVQIEMN |   |   |        |     |                              |           |   |     |      |      |     |
| KK                      | R | R | 95.00% | 68  | M22: Oxidation               | 936.1401  | 3 | 9.5 | 1142 | 1166 | Yes |
| ELENELEAEQK             | R | R | 95.00% | 85  |                              | 666.3235  | 2 | 4.5 | 1821 | 1831 | No  |
| ELENELEAEQKR            | R | N | 95.00% | 81  |                              | 744.3724  | 2 | 1.9 | 1821 | 1832 | No  |
| ELENELEAEQKR            | R | N | 95.00% | 47  |                              | 496.5846  | 3 | 2.7 | 1821 | 1832 | No  |
| ELTYQTEEDR              | K | K | 95.00% | 51  |                              | 642.2961  | 2 | 6.8 | 1849 | 1858 | Yes |
| ELTYQTEEDRK             | K | N | 95.00% | 70  |                              | 706.3410  | 2 | 2.5 | 1849 | 1859 | Yes |
| ELTYQTEEDRK             | K | N | 95.00% | 42  |                              | 471.2320  | 3 | 6.8 | 1849 | 1859 | Yes |
| ELTYQTEEDRKNLLR         | K | L | 95.00% | 46  |                              | 954.5008  | 2 | 5.8 | 1849 | 1863 | No  |
| ELTYQTEEDRKNLLR         | K | L | 95.00% | 39  |                              | 636.6688  | 3 | 4.2 | 1849 | 1863 | No  |
| EMASMKEEFTR             | K | L | 95.00% | 47  | M2: Oxidation                | 687.8074  | 2 | 2.7 | 848  | 858  | No  |
| EMASMKEEFTR             | K | L | 95.00% | 41  | M2: Oxidation                | 458.8740  | 3 | 2.2 | 848  | 858  | No  |
| EMASMKEEFTR             | K | L | 95.00% | 65  | M2: Oxidation                | 695.8058  | 2 | 4.0 | 848  | 858  | No  |
| EMASMKEEFTR             | K | L | 95.00% | 45  | M2: Oxidation                | 464.2057  | 3 | 2.4 | 848  | 858  | No  |
| EMASMKEEFTR             | K | L | 95.00% | 65  | M2: Oxidation, M5: Oxidation | 695.8058  | 2 | 4.0 | 848  | 858  | No  |
| EMASMKEEFTR             | K | L | 95.00% | 45  | M2: Oxidation, M5: Oxidation | 464.2057  | 3 | 2.4 | 848  | 858  | No  |
| EMASMKEEFTR             | K | L | 95.00% | 34  | M5: Oxidation                | 687.8076  | 2 | 2.9 | 848  | 858  | No  |
| EMASMKEEFTR             | K | L | 95.00% | 44  |                              | 679.8142  | 2 | 8.9 | 848  | 858  | No  |
| EMASMKEEFTR             | K | L | 95.00% | 36  |                              | 453.5437  | 3 | 5.2 | 848  | 858  | No  |
| EMNERLEDEEEMNAELTAK     | K | K | 95.00% | 70  | M12: Oxidation               | 766.3376  | 3 | 2.6 | 921  | 939  | Yes |
| EMNERLEDEEEMNAELTAK     | K | K | 95.00% | 73  | M12: Oxidation               | 771.6697  | 3 | 3.2 | 921  | 939  | Yes |
| ENIAIVER                | K | R | 95.00% | 43  |                              | 472.2666  | 2 | 4.3 | 1669 | 1676 | Yes |
| ENKNLQEEISDLTEQLGSSGK   | R | T | 95.00% | 125 |                              | 1160.0780 | 2 | 6.9 | 1501 | 1521 | No  |
| ENKNLQEEISDLTEQLGSSGK   | R | T | 95.00% | 84  |                              | 773.7184  | 3 | 3.4 | 1501 | 1521 | No  |
| ENQSILITGESGAGK         | R | T | 95.00% | 118 |                              | 752.3882  | 2 | 1.9 | 170  | 184  | Yes |
| ENQSILITGESGAGK         | R | T | 95.00% | 46  |                              | 501.9288  | 3 | 3.5 | 170  | 184  | Yes |
| EQD TSAHLER             | K | M | 95.00% | 69  |                              | 593.2841  | 2 | 8.6 | 1772 | 1781 | Yes |
| EQYEEETEAK              | R | A | 95.00% | 52  |                              | 628.2742  | 2 | 5.9 | 1345 | 1354 | Yes |
| EQYEEETEAKAELQR         | R | V | 95.00% | 104 |                              | 928.9355  | 2 | 3.6 | 1345 | 1359 | Yes |
| EQYEEETEAKAELQR         | R | V | 95.00% | 39  |                              | 618.2937  | 3 | 4.8 | 1345 | 1359 | Yes |
| FDKIEDMAMLTFLHEPAVLYNLK | K | D | 95.00% | 58  | M7: Oxidation                | 689.3574  | 4 | 6.3 | 84   | 106  | No  |
| FDKIEDMAMLTFLHEPAVLYNLK | K | D | 95.00% | 49  | M7: Oxidation                | 924.1385  | 3 | 5.9 | 84   | 106  | No  |
| FDKIEDMAMLTFLHEPAVLYNLK | K | D | 95.00% | 65  | M7: Oxidation                | 693.3564  | 4 | 6.7 | 84   | 106  | No  |
| FDKIEDMAMLTFLHEPAVLYNLK | K | D | 95.00% | 49  | M7: Oxidation, M9: Oxidation | 924.1385  | 3 | 5.9 | 84   | 106  | No  |
| FDKIEDMAMLTFLHEPAVLYNLK | K | D | 95.00% | 65  | M7: Oxidation, M9: Oxidation | 693.3564  | 4 | 6.7 | 84   | 106  | No  |
| FDKIEDMAMLTFLHEPAVLYNLK | K | D | 95.00% | 67  | M9: Oxidation                | 689.3573  | 4 | 6.2 | 84   | 106  | No  |
| FDKIEDMAMLTFLHEPAVLYNLK | K | D | 95.00% | 49  |                              | 913.4783  | 3 | 9.4 | 84   | 106  | No  |
| FDKIEDMAMLTFLHEPAVLYNLK | K | D | 95.00% | 71  |                              | 685.3597  | 4 | 7.9 | 84   | 106  | No  |
| GKLTYYQQLLEDLK          | R | R | 95.00% | 40  |                              | 768.9211  | 2 | 4.4 | 1304 | 1316 | No  |
| GKLTYYQQLLEDLK          | R | R | 95.00% | 32  |                              | 512.9494  | 3 | 3.3 | 1304 | 1316 | No  |
| GKLTYYQQLLEDLKR         | R | Q | 95.00% | 93  |                              | 846.9693  | 2 | 1.2 | 1304 | 1317 | No  |
| GKLTYYQQLLEDLKR         | R | Q | 95.00% | 84  |                              | 564.9838  | 3 | 4.2 | 1304 | 1317 | No  |
| GKLTYYQQLLEDLKR         | R | Q | 95.00% | 34  |                              | 423.9901  | 4 | 4.8 | 1304 | 1317 | No  |
| GKPEAHFSLIHYAGIVDNIIGWL |   |   |        |     |                              |           |   |     |      |      |     |
| QK                      | K | N | 95.00% | 98  |                              | 990.5364  | 3 | 8.7 | 571  | 596  | No  |
| QQNQQVIYATGALAK         | K | A | 95.00% | 149 |                              | 830.9611  | 2 | 7.2 | 414  | 429  | No  |

|                         |   |   |        |     |                              |           |   |      |      |      |     |
|-------------------------|---|---|--------|-----|------------------------------|-----------|---|------|------|------|-----|
| GQNVQQVIYATGALAK        | K | A | 95.00% | 62  |                              | 554.3097  | 3 | 6.6  | 414  | 429  | No  |
| GSSFQTVSALHR            | K | E | 95.00% | 78  |                              | 645.3373  | 2 | 5.1  | 641  | 652  | Yes |
| GSSFQTVSALHRENLNK       | K | L | 95.00% | 60  |                              | 944.4929  | 2 | 5.4  | 641  | 657  | Yes |
| GTLEDQIIQANPALEAFGNAK   | K | T | 95.00% | 143 |                              | 1100.5760 | 2 | 8.4  | 214  | 234  | Yes |
| GTLEDQIIQANPALEAFGNAK   | K | T | 95.00% | 96  |                              | 734.0500  | 3 | 4.2  | 214  | 234  | Yes |
| HADSVAEELGEQIDNLQR      | K | V | 95.00% | 166 |                              | 947.9739  | 2 | 7.4  | 1196 | 1212 | Yes |
| HADSVAEELGEQIDNLQR      | K | V | 95.00% | 85  |                              | 632.3179  | 3 | 6.4  | 1196 | 1212 | Yes |
| HRLQNEIEDLMVDVER        | K | S | 95.00% | 86  | M11: Oxidation               | 671.3367  | 3 | 3.6  | 1419 | 1434 | Yes |
| HRLQNEIEDLMVDVER        | K | S | 95.00% | 79  |                              | 998.5089  | 2 | 8.8  | 1419 | 1434 | Yes |
| HRLQNEIEDLMVDVER        | K | S | 95.00% | 88  |                              | 666.0065  | 3 | 5.7  | 1419 | 1434 | Yes |
| HRLQNEIEDLMVDVER        | K | S | 95.00% | 34  |                              | 499.7565  | 4 | 5.1  | 1419 | 1434 | Yes |
| IEDEQALGSQLOK           | R | K | 95.00% | 135 |                              | 729.8759  | 2 | -0.2 | 1094 | 1106 | No  |
| IEDEQALGSQLOK           | R | K | 95.00% | 59  |                              | 486.9212  | 3 | 2.6  | 1094 | 1106 | No  |
| IEDEQALGSQLOK           | R | L | 95.00% | 73  |                              | 793.9267  | 2 | 4.0  | 1094 | 1107 | No  |
| IEDMAMLTFLHEPAVLYNLK    | K | D | 95.00% | 70  | M4: Oxidation                | 788.7446  | 3 | 8.3  | 87   | 106  | No  |
| IEDMAMLTFLHEPAVLYNLK    | K | D | 95.00% | 65  | M4: Oxidation                | 1190.6100 | 2 | 8.0  | 87   | 106  | No  |
| IEDMAMLTFLHEPAVLYNLK    | K | D | 95.00% | 71  | M4: Oxidation                | 794.0759  | 3 | 7.9  | 87   | 106  | No  |
| IEDMAMLTFLHEPAVLYNLK    | K | D | 95.00% | 65  | M4: Oxidation, M6: Oxidation | 1190.6100 | 2 | 8.0  | 87   | 106  | No  |
| IEDMAMLTFLHEPAVLYNLK    | K | D | 95.00% | 71  | M4: Oxidation, M6: Oxidation | 794.0759  | 3 | 7.9  | 87   | 106  | No  |
| IEDMAMLTFLHEPAVLYNLK    | K | D | 95.00% | 57  | M6: Oxidation                | 788.7410  | 3 | 3.8  | 87   | 106  | No  |
| IEDMAMLTFLHEPAVLYNLK    | K | D | 95.00% | 48  |                              | 783.4089  | 3 | 3.1  | 87   | 106  | No  |
| IEELEEELEAER            | R | T | 95.00% | 103 |                              | 744.8617  | 2 | 5.7  | 1115 | 1126 | Yes |
| IEELEEELEAER            | R | T | 95.00% | 67  |                              | 496.9096  | 3 | 4.0  | 1115 | 1126 | Yes |
| IKELTYQTEEDR            | R | K | 95.00% | 67  |                              | 762.8881  | 2 | 9.0  | 1847 | 1858 | No  |
| IKELTYQTEEDR            | R | K | 95.00% | 33  |                              | 508.9268  | 3 | 6.6  | 1847 | 1858 | No  |
| IKELTYQTEEDRK           | R | N | 95.00% | 91  |                              | 826.9315  | 2 | 3.3  | 1847 | 1859 | No  |
| IKELTYQTEEDRK           | R | N | 95.00% | 68  |                              | 551.6251  | 3 | 6.1  | 1847 | 1859 | No  |
| IKELTYQTEEDRK           | R | N | 95.00% | 44  |                              | 413.9694  | 4 | 2.7  | 1847 | 1859 | No  |
| ILAEWK                  | K | Q | 95.00% | 33  |                              | 759.4422  | 1 | 2.1  | 1452 | 1457 | Yes |
| ILNPAIPEGQFIDSR         | R | K | 95.00% | 102 |                              | 870.9727  | 2 | 5.1  | 724  | 739  | No  |
| ILNPAIPEGQFIDSR         | R | K | 95.00% | 85  |                              | 580.9843  | 3 | 5.0  | 724  | 739  | No  |
| ILYGDFR                 | R | Q | 95.00% | 43  |                              | 442.2399  | 2 | 4.6  | 713  | 719  | Yes |
| INATLETK                | R | Q | 95.00% | 34  |                              | 889.5071  | 1 | 8.5  | 443  | 450  | No  |
| INATLETK                | R | Q | 95.00% | 52  |                              | 445.2545  | 2 | 1.9  | 443  | 450  | Yes |
| INATLETKQPR             | R | Q | 95.00% | 51  |                              | 635.8622  | 2 | 3.6  | 443  | 453  | Yes |
| IQLEAK                  | K | V | 95.00% | 37  |                              | 701.4219  | 1 | 2.9  | 913  | 918  | Yes |
| KAITDAAMMAEELKK         | K | E | 95.00% | 101 | M8: Oxidation                | 833.4363  | 2 | 5.3  | 1757 | 1771 | Yes |
| KAITDAAMMAEELKK         | K | E | 95.00% | 81  | M8: Oxidation                | 555.9587  | 3 | 2.7  | 1757 | 1771 | Yes |
| KAITDAAMMAEELKK         | K | E | 95.00% | 35  | M8: Oxidation                | 417.2235  | 4 | 8.8  | 1757 | 1771 | Yes |
| KAITDAAMMAEELKK         | K | E | 95.00% | 80  | M8: Oxidation                | 841.4315  | 2 | 2.7  | 1757 | 1771 | Yes |
| KAITDAAMMAEELKK         | K | E | 95.00% | 64  | M8: Oxidation                | 561.2909  | 3 | 3.8  | 1757 | 1771 | Yes |
| KAITDAAMMAEELKK         | K | E | 95.00% | 80  | M8: Oxidation, M9: Oxidation | 841.4315  | 2 | 2.7  | 1757 | 1771 | Yes |
| KAITDAAMMAEELKK         | K | E | 95.00% | 64  | M9: Oxidation                | 561.2909  | 3 | 3.8  | 1757 | 1771 | Yes |
| KAITDAAMMAEELKK         | K | E | 95.00% | 103 | M9: Oxidation                | 833.4359  | 2 | 4.9  | 1757 | 1771 | Yes |
| KAITDAAMMAEELKK         | K | E | 95.00% | 63  | M9: Oxidation                | 555.9584  | 3 | 2.3  | 1757 | 1771 | Yes |
| KAITDAAMMAEELKK         | K | E | 95.00% | 37  | M9: Oxidation                | 417.2219  | 4 | 5.0  | 1757 | 1771 | Yes |
| KAITDAAMMAEELKK         | K | E | 95.00% | 107 |                              | 825.4387  | 2 | 5.2  | 1757 | 1771 | Yes |
| KAITDAAMMAEELKK         | K | E | 95.00% | 92  |                              | 550.6276  | 3 | 3.8  | 1757 | 1771 | Yes |
| KAITDAAMMAEELKK         | K | E | 95.00% | 42  |                              | 413.2216  | 4 | 1.3  | 1757 | 1771 | Yes |
| KALQEAHQALDDLQAEEDKVN   |   |   |        |     |                              |           |   |      |      |      |     |
| TLTK                    | K | A | 95.00% | 103 |                              | 979.5103  | 3 | 6.4  | 997  | 1022 | No  |
| KALQEAHQALDDLQAEEDKVN   |   |   |        |     |                              |           |   |      |      |      |     |
| TLTK                    | K | A | 95.00% | 65  |                              | 734.8832  | 4 | 4.3  | 997  | 1022 | No  |
| KALQEAHQALDDLQAEEDKVN   |   |   |        |     |                              |           |   |      |      |      |     |
| TLTK                    | K | A | 95.00% | 49  |                              | 588.1085  | 5 | 5.1  | 997  | 1022 | No  |
| KDFELNALNAR             | K | I | 95.00% | 76  |                              | 645.8459  | 2 | 2.6  | 1083 | 1093 | No  |
| KDFELNALNAR             | K | I | 95.00% | 33  |                              | 430.9003  | 3 | 3.4  | 1083 | 1093 | No  |
| KDQSPGKGTLEDQIIQANPALEA |   |   |        |     |                              |           |   |      |      |      |     |
| FGNAK                   | K | T | 95.00% | 97  |                              | 980.8472  | 3 | 6.6  | 207  | 234  | No  |
| KDQSPGKGTLEDQIIQANPALEA |   |   |        |     |                              |           |   |      |      |      |     |
| FGNAK                   | K | T | 95.00% | 41  |                              | 735.8881  | 4 | 7.5  | 207  | 234  | No  |
| KDVFPDDKQEFVK           | K | A | 95.00% | 44  |                              | 847.4459  | 2 | 2.2  | 35   | 48   | No  |
| KDVFPDDKQEFVK           | K | A | 95.00% | 32  |                              | 565.3014  | 3 | 5.0  | 35   | 48   | No  |
| KGSSFQTVSALHR           | K | E | 95.00% | 101 |                              | 709.3837  | 2 | 3.0  | 640  | 652  | Yes |
| KGSSFQTVSALHR           | K | E | 95.00% | 69  |                              | 473.2583  | 3 | 2.9  | 640  | 652  | Yes |
| KHADSVAEELGEQIDNLQR     | K | V | 95.00% | 137 |                              | 1012.0210 | 2 | 6.5  | 1195 | 1212 | Yes |

|                        |   |   |        |     |                                  |           |   |      |      |      |     |
|------------------------|---|---|--------|-----|----------------------------------|-----------|---|------|------|------|-----|
| KHADSVaelGEQIDNLQR     | K | V | 95.00% | 93  |                                  | 675.0148  | 3 | 3.8  | 1195 | 1212 | Yes |
| KHADSVaelGEQIDNLQR     | K | V | 95.00% | 66  |                                  | 506.5136  | 4 | 4.9  | 1195 | 1212 | Yes |
| KKDFELNALNAR           | K | I | 95.00% | 98  |                                  | 709.8933  | 2 | 2.2  | 1082 | 1093 | No  |
| KKDFELNALNAR           | K | I | 95.00% | 55  |                                  | 473.5987  | 3 | 3.4  | 1082 | 1093 | No  |
| KKHADSVaelGEQIDNLQR    | R | V | 95.00% | 89  |                                  | 717.7142  | 3 | 5.1  | 1194 | 1212 | Yes |
| KKHADSVaelGEQIDNLQR    | R | V | 95.00% | 53  |                                  | 538.5365  | 4 | 3.1  | 1194 | 1212 | Yes |
| KKMDADLSQLQTEVEEAVQECR | K | N | 95.00% | 42  | M3: Oxidation                    | 856.0825  | 3 | 7.3  | 1728 | 1749 | No  |
| KKMEGDLNEMEIQLSHANR    | K | M | 95.00% | 48  | M10: Oxidation                   | 565.5286  | 4 | 2.1  | 1616 | 1634 | Yes |
| KKMEGDLNEMEIQLSHANR    | K | M | 95.00% | 54  | M3: Oxidation                    | 753.7057  | 3 | 6.7  | 1616 | 1634 | Yes |
| KKMEGDLNEMEIQLSHANR    | K | M | 95.00% | 42  | M3: Oxidation                    | 565.5287  | 4 | 2.2  | 1616 | 1634 | Yes |
| KKMEGDLNEMEIQLSHANR    | K | M | 95.00% | 60  | M3: Oxidation                    | 759.0351  | 3 | 3.6  | 1616 | 1634 | Yes |
| KKMEGDLNEMEIQLSHANR    | K | M | 95.00% | 69  | M3: Oxidation                    | 569.5274  | 4 | 2.1  | 1616 | 1634 | Yes |
| KKMEGDLNEMEIQLSHANR    | K | M | 95.00% | 60  | M3: Oxidation,<br>M10: Oxidation | 759.0351  | 3 | 3.6  | 1616 | 1634 | Yes |
| KKMEGDLNEMEIQLSHANR    | K | M | 95.00% | 69  | M10: Oxidation                   | 569.5274  | 4 | 2.1  | 1616 | 1634 | Yes |
| KKMEGDLNEMEIQLSHANR    | K | M | 95.00% | 61  |                                  | 748.3721  | 3 | 4.1  | 1616 | 1634 | Yes |
| KKMEGDLNEMEIQLSHANR    | K | M | 95.00% | 69  |                                  | 561.5313  | 4 | 4.5  | 1616 | 1634 | Yes |
| KLAEQELIETSER          | R | V | 95.00% | 113 |                                  | 773.4159  | 2 | 7.4  | 1700 | 1712 | Yes |
| KLAEQELIETSER          | R | V | 95.00% | 66  |                                  | 515.9439  | 3 | 2.1  | 1700 | 1712 | Yes |
| KLEGDLK                | R | L | 95.00% | 39  |                                  | 401.7396  | 2 | 4.6  | 1054 | 1060 | Yes |
| KMDADLSQLQTEVEEAVQECR  | K | N | 95.00% | 85  | M2: Oxidation                    | 813.3857  | 3 | 9.6  | 1729 | 1749 | No  |
| KMEGDLNEMEIQLSHANR     | K | M | 95.00% | 83  | M2: Oxidation                    | 711.0037  | 3 | 2.1  | 1617 | 1634 | Yes |
| KMEGDLNEMEIQLSHANR     | K | M | 95.00% | 49  | M2: Oxidation                    | 533.5064  | 4 | 5.2  | 1617 | 1634 | Yes |
| KMEGDLNEMEIQLSHANR     | K | M | 95.00% | 90  | M2: Oxidation                    | 1074.0030 | 2 | 6.0  | 1617 | 1634 | Yes |
| KMEGDLNEMEIQLSHANR     | K | M | 95.00% | 59  | M2: Oxidation                    | 716.3382  | 3 | 6.0  | 1617 | 1634 | Yes |
| KMEGDLNEMEIQLSHANR     | K | M | 95.00% | 47  | M2: Oxidation                    | 537.5055  | 4 | 5.9  | 1617 | 1634 | Yes |
| KMEGDLNEMEIQLSHANR     | K | M | 95.00% | 90  | M2: Oxidation, M9:<br>Oxidation  | 1074.0030 | 2 | 6.0  | 1617 | 1634 | Yes |
| KMEGDLNEMEIQLSHANR     | K | M | 95.00% | 59  | M2: Oxidation, M9:<br>Oxidation  | 716.3382  | 3 | 6.0  | 1617 | 1634 | Yes |
| KMEGDLNEMEIQLSHANR     | K | M | 95.00% | 47  | M2: Oxidation, M9:<br>Oxidation  | 537.5055  | 4 | 5.9  | 1617 | 1634 | Yes |
| KMEGDLNEMEIQLSHANR     | K | M | 95.00% | 52  | M9: Oxidation                    | 711.0025  | 3 | 0.3  | 1617 | 1634 | Yes |
| KMEGDLNEMEIQLSHANR     | K | M | 95.00% | 37  | M9: Oxidation                    | 533.5066  | 4 | 5.5  | 1617 | 1634 | Yes |
| KMEGDLNEMEIQLSHANR     | K | M | 95.00% | 107 |                                  | 1058.0130 | 2 | 9.9  | 1617 | 1634 | Yes |
| KMEGDLNEMEIQLSHANR     | K | M | 95.00% | 87  |                                  | 705.6741  | 3 | 4.8  | 1617 | 1634 | Yes |
| KMEGDLNEMEIQLSHANR     | K | M | 95.00% | 46  |                                  | 529.5076  | 4 | 5.0  | 1617 | 1634 | Yes |
| KQLEAEKMEQLQSALEEAASLE |   |   |        |     |                                  |           |   |      |      |      |     |
| HEEGK                  | R | I | 95.00% | 103 | M8: Oxidation                    | 1024.8380 | 3 | 9.3  | 1531 | 1557 | No  |
| KQLEAEKMEQLQSALEEAASLE |   |   |        |     |                                  |           |   |      |      |      |     |
| HEEGK                  | R | I | 95.00% | 62  | M8: Oxidation                    | 768.8776  | 4 | 6.0  | 1531 | 1557 | No  |
| KQLEAEKMEQLQSALEEAASLE |   |   |        |     |                                  |           |   |      |      |      |     |
| HEEGK                  | R | I | 95.00% | 57  | M8: Oxidation                    | 615.3052  | 5 | 8.6  | 1531 | 1557 | No  |
| KVQHELDEAEER           | R | A | 95.00% | 64  |                                  | 741.8678  | 2 | 5.9  | 1898 | 1909 | Yes |
| KVQHELDEAEER           | R | A | 95.00% | 62  |                                  | 494.9157  | 3 | 8.4  | 1898 | 1909 | Yes |
| KVQHELDEAEERADIAESQVNK | R | L | 95.00% | 97  |                                  | 1269.6380 | 2 | 9.4  | 1898 | 1919 | Yes |
| KVQHELDEAEERADIAESQVNK | R | L | 95.00% | 58  |                                  | 846.7584  | 3 | 6.3  | 1898 | 1919 | Yes |
| KVQHELDEAEERADIAESQVNK | R | L | 95.00% | 67  |                                  | 635.3188  | 4 | 3.2  | 1898 | 1919 | Yes |
| LAEKDEEMEQAKR          | K | N | 95.00% | 50  | M8: Oxidation                    | 531.5968  | 3 | 9.8  | 1576 | 1588 | Yes |
| LAEKDEEMEQAKR          | K | N | 95.00% | 46  |                                  | 526.2601  | 3 | 0.3  | 1576 | 1588 | Yes |
| LAEQELIETSER           | K | V | 95.00% | 115 |                                  | 709.3655  | 2 | 3.9  | 1701 | 1712 | Yes |
| LAEQELIETSER           | K | V | 95.00% | 41  |                                  | 473.2462  | 3 | 3.9  | 1701 | 1712 | Yes |
| LASADIETYLLEK          | K | S | 95.00% | 129 |                                  | 733.3926  | 2 | -1.2 | 258  | 270  | Yes |
| LASADIETYLLEK          | K | S | 95.00% | 69  |                                  | 489.2671  | 3 | 4.5  | 258  | 270  | Yes |
| LDEAEQIALK             | R | G | 95.00% | 51  |                                  | 1129.6220 | 1 | 9.6  | 1797 | 1806 | Yes |
| LDEAEQIALK             | R | G | 95.00% | 97  |                                  | 565.3107  | 2 | 2.5  | 1797 | 1806 | Yes |
| LDEAEQIALKGGK          | R | K | 95.00% | 66  |                                  | 686.3813  | 2 | 4.5  | 1797 | 1809 | Yes |
| LDEAEQIALKGGK          | R | K | 95.00% | 42  |                                  | 457.9226  | 3 | 2.6  | 1797 | 1809 | Yes |
| LDEAEQIALKGGK          | R | Q | 95.00% | 81  |                                  | 750.4314  | 2 | 7.6  | 1797 | 1810 | Yes |
| LDEAEQIALKGGK          | R | Q | 95.00% | 45  |                                  | 500.6212  | 3 | 2.9  | 1797 | 1810 | Yes |
| LEAQRPFDLK             | R | K | 95.00% | 60  |                                  | 659.3650  | 2 | 4.0  | 24   | 34   | No  |
| LEAQRPFDLK             | R | D | 95.00% | 57  |                                  | 723.4115  | 2 | 2.3  | 24   | 35   | No  |
| LEAQRPFDLK             | R | D | 95.00% | 41  |                                  | 482.6107  | 3 | 3.2  | 24   | 35   | No  |
| LEDEEEMNAELTAK         | R | K | 95.00% | 117 | M7: Oxidation                    | 819.3672  | 2 | 2.9  | 926  | 939  | Yes |

|                      |   |   |        |     |                                  |           |   |      |      |      |     |
|----------------------|---|---|--------|-----|----------------------------------|-----------|---|------|------|------|-----|
| LEDEEEMNAELTAK       | R | K | 95.00% | 124 |                                  | 811.3694  | 2 | 2.5  | 926  | 939  | Yes |
| LEEAGGATSVQIEMNK     | R | K | 95.00% | 146 | M14: Oxidation                   | 846.9111  | 2 | 1.7  | 1150 | 1165 | Yes |
| LEEAGGATSVQIEMNK     | R | K | 95.00% | 50  | M14: Oxidation                   | 564.9460  | 3 | 6.3  | 1150 | 1165 | Yes |
| LEEAGGATSVQIEMNK     | R | K | 95.00% | 132 |                                  | 838.9142  | 2 | 2.4  | 1150 | 1165 | Yes |
| LEEAGGATSVQIEMNKK    | R | R | 95.00% | 71  | M14: Oxidation                   | 910.9600  | 2 | 3.2  | 1150 | 1166 | Yes |
| LEEAGGATSVQIEMNKK    | R | R | 95.00% | 34  | M14: Oxidation                   | 607.6447  | 3 | 6.6  | 1150 | 1166 | No  |
| LELDDVTSNMEQIIK      | K | A | 95.00% | 104 | M10: Oxidation                   | 882.4473  | 2 | 7.3  | 1226 | 1240 | Yes |
| LELDDVTSNMEQIIK      | K | A | 95.00% | 32  | M10: Oxidation                   | 588.6335  | 3 | 6.1  | 1226 | 1240 | No  |
| LELDDVTSNMEQIIK      | K | A | 95.00% | 97  |                                  | 874.4501  | 2 | 7.5  | 1226 | 1240 | Yes |
| LELDDVTSNMEQIIK      | K | A | 95.00% | 72  |                                  | 583.3007  | 3 | 4.2  | 1226 | 1240 | Yes |
| LEQQVDDLEGSLEQEK     | K | K | 95.00% | 144 |                                  | 930.4526  | 2 | 5.2  | 1027 | 1042 | Yes |
| LEQQVDDLEGSLEQEK     | K | K | 95.00% | 113 |                                  | 620.6381  | 3 | 5.9  | 1027 | 1042 | Yes |
| LEQQVDDLEGSLEQEK     | K | V | 95.00% | 116 |                                  | 994.5015  | 2 | 6.3  | 1027 | 1043 | Yes |
| LEQQVDDLEGSLEQEK     | K | V | 95.00% | 69  |                                  | 663.3355  | 3 | 4.1  | 1027 | 1043 | Yes |
| LFDNHLGK             | K | S | 95.00% | 31  |                                  | 943.5037  | 1 | 3.6  | 552  | 559  | No  |
| LFDNHLGK             | K | S | 95.00% | 55  |                                  | 472.2547  | 2 | 1.4  | 552  | 559  | No  |
| LKEALEK              | R | S | 95.00% | 30  |                                  | 415.7544  | 2 | 2.6  | 859  | 865  | No  |
| LKELQAR              | K | I | 95.00% | 31  |                                  | 429.2654  | 2 | 2.3  | 1108 | 1114 | No  |
| LKNAYEESLEHLETFK     | K | R | 95.00% | 133 |                                  | 976.0031  | 2 | 8.7  | 1484 | 1499 | Yes |
| LKNAYEESLEHLETFK     | K | R | 95.00% | 75  |                                  | 651.0009  | 3 | 2.9  | 1484 | 1499 | Yes |
| LKNAYEESLEHLETFK     | K | R | 95.00% | 45  |                                  | 488.5031  | 4 | 3.9  | 1484 | 1499 | Yes |
| LKNAYEESLEHLETFKR    | K | E | 95.00% | 113 |                                  | 1054.0520 | 2 | 6.0  | 1484 | 1500 | Yes |
| LKNAYEESLEHLETFKR    | K | E | 95.00% | 59  |                                  | 703.0364  | 3 | 5.3  | 1484 | 1500 | Yes |
| LKNAYEESLEHLETFKR    | K | E | 95.00% | 53  |                                  | 527.5279  | 4 | 2.8  | 1484 | 1500 | Yes |
| LKQREQAEPDGTTEEADK   | K | S | 95.00% | 39  |                                  | 691.6658  | 3 | 3.8  | 366  | 383  | No  |
| LLSSLDIDHNQYK        | K | F | 95.00% | 105 |                                  | 773.4031  | 2 | 4.5  | 745  | 757  | Yes |
| LLSSLDIDHNQYK        | K | F | 95.00% | 34  |                                  | 515.9373  | 3 | 3.2  | 745  | 757  | Yes |
| LLSTLFANYAGADAPIEK   | K | G | 95.00% | 140 |                                  | 947.5093  | 2 | 7.5  | 616  | 633  | No  |
| LLSTLFANYAGADAPIEK   | K | G | 95.00% | 91  |                                  | 632.0070  | 3 | 4.6  | 616  | 633  | No  |
| LQDLVDK              | R | L | 95.00% | 35  |                                  | 830.4684  | 1 | 7.0  | 1864 | 1870 | Yes |
| LQDLVDK              | R | L | 95.00% | 42  |                                  | 415.7369  | 2 | 4.1  | 1864 | 1870 | Yes |
| LQDLVDKLQLK          | R | V | 95.00% | 85  |                                  | 656.8982  | 2 | 3.2  | 1864 | 1874 | Yes |
| LQDLVDKLQLK          | R | V | 95.00% | 64  |                                  | 438.2683  | 3 | 3.7  | 1864 | 1874 | Yes |
| LQEAEEAVEAVNAK       | R | C | 95.00% | 131 |                                  | 750.8849  | 2 | 5.0  | 1397 | 1410 | No  |
| LQEAEEAVEAVNAK       | R | C | 95.00% | 68  |                                  | 500.9250  | 3 | 3.3  | 1397 | 1410 | No  |
| LQEAEEAVEAVNAKSSLEK  | R | T | 95.00% | 74  |                                  | 716.6912  | 3 | 4.1  | 1397 | 1416 | No  |
| LQNEIEDLMVDVER       | R | S | 95.00% | 123 | M9: Oxidation                    | 859.9257  | 2 | 9.6  | 1421 | 1434 | Yes |
| LQNEIEDLMVDVER       | R | S | 95.00% | 92  | M9: Oxidation                    | 573.6166  | 3 | 4.1  | 1421 | 1434 | Yes |
| LQNEIEDLMVDVER       | R | S | 95.00% | 109 |                                  | 851.9232  | 2 | 3.7  | 1421 | 1434 | Yes |
| LQNEIEDLMVDVER       | R | S | 95.00% | 79  |                                  | 568.2845  | 3 | 3.2  | 1421 | 1434 | Yes |
| LQQFFNHMFVLEQEEYK    | K | K | 95.00% | 58  | M9: Oxidation                    | 795.0480  | 3 | 4.4  | 485  | 502  | Yes |
| LQQFFNHMFVLEQEEYK    | K | K | 95.00% | 35  | M9: Oxidation                    | 596.5412  | 4 | 9.8  | 485  | 502  | Yes |
| LQQFFNHMFVLEQEEYK    | K | K | 95.00% | 43  |                                  | 789.7178  | 3 | 6.2  | 485  | 502  | Yes |
| LQQFFNHMFVLEQEEYK    | K | K | 95.00% | 42  |                                  | 592.5402  | 4 | 6.1  | 485  | 502  | Yes |
| LQQFFNHMFVLEQEEYK    | K | E | 95.00% | 68  | M9: Oxidation                    | 1256.1180 | 2 | 5.7  | 485  | 503  | Yes |
| LQQFFNHMFVLEQEEYK    | K | E | 95.00% | 51  | M9: Oxidation                    | 837.7500  | 3 | 8.6  | 485  | 503  | Yes |
| LQQFFNHMFVLEQEEYK    | K | E | 95.00% | 103 |                                  | 1248.1230 | 2 | 8.3  | 485  | 503  | Yes |
| LQQFFNHMFVLEQEEYK    | K | E | 95.00% | 57  |                                  | 832.4158  | 3 | 5.6  | 485  | 503  | Yes |
| LQQFFNHMFVLEQEEYK    | K | E | 95.00% | 42  |                                  | 499.8525  | 5 | 5.4  | 485  | 503  | Yes |
| LQTENGELSR           | K | Q | 95.00% | 49  |                                  | 573.7955  | 2 | 6.7  | 1280 | 1289 | No  |
| LTGAIMHFGNMK         | K | F | 95.00% | 67  | M11: Oxidation                   | 668.3349  | 2 | 4.8  | 352  | 363  | Yes |
| LTGAIMHFGNMK         | K | F | 95.00% | 78  | M6: Oxidation                    | 668.3349  | 2 | 4.8  | 352  | 363  | No  |
| LTGAIMHFGNMK         | K | F | 95.00% | 64  | M6: Oxidation                    | 676.3300  | 2 | 1.4  | 352  | 363  | No  |
| LTGAIMHFGNMK         | K | F | 95.00% | 67  | M6: Oxidation,<br>M11: Oxidation | 676.3319  | 2 | 4.2  | 352  | 363  | Yes |
| LTGAIMHFGNMK         | K | F | 95.00% | 95  |                                  | 660.3377  | 2 | 5.3  | 352  | 363  | Yes |
| LTQESIMDLENDK        | K | Q | 95.00% | 86  | M7: Oxidation                    | 776.3684  | 2 | 4.9  | 1061 | 1073 | No  |
| LTQESIMDLENDK        | K | Q | 95.00% | 58  |                                  | 768.3713  | 2 | 5.4  | 1061 | 1073 | No  |
| LTQESIMDLENDKQLDER   | K | L | 95.00% | 107 | M7: Oxidation                    | 1161.0610 | 2 | 8.9  | 1061 | 1079 | No  |
| LTQESIMDLENDKQLDER   | K | L | 95.00% | 78  | M7: Oxidation                    | 774.3716  | 3 | 2.6  | 1061 | 1079 | No  |
| LTQESIMDLENDKQLDER   | K | L | 95.00% | 41  | M7: Oxidation                    | 581.0270  | 4 | -3.7 | 1061 | 1079 | No  |
| LTQESIMDLENDKQLDER   | K | L | 95.00% | 118 |                                  | 1153.0620 | 2 | 7.3  | 1061 | 1079 | No  |
| LTQESIMDLENDKQLDER   | K | L | 95.00% | 73  |                                  | 769.0417  | 3 | 4.8  | 1061 | 1079 | No  |
| LTYTQLEDLK           | K | R | 95.00% | 85  |                                  | 676.3633  | 2 | 5.6  | 1306 | 1316 | No  |
| LTYTQLEDLKR          | K | Q | 95.00% | 85  |                                  | 754.4125  | 2 | 3.2  | 1306 | 1317 | No  |
| LTYTQLEDLKR          | K | Q | 95.00% | 64  |                                  | 503.2791  | 3 | 6.2  | 1306 | 1317 | No  |
| MDADLSQLQTEVEEAVQEQR | K | N | 95.00% | 73  | M1: Oxidation                    | 1155.5250 | 2 | 8.2  | 1730 | 1749 | No  |
| MEGDLNEMEIQLSHANR    | K | M | 95.00% | 106 | M1: Oxidation                    | 1001.9560 | 2 | 4.1  | 1618 | 1634 | Yes |
| MEGDLNEMEIQLSHANR    | K | M | 95.00% | 68  | M1: Oxidation                    | 668.3069  | 3 | 4.4  | 1618 | 1634 | Yes |
| MEGDLNEMEIQLSHANR    | K | M | 95.00% | 88  | M1: Oxidation                    | 1009.9510 | 2 | 1.6  | 1618 | 1634 | Yes |

|                           |   |   |        |     |                              |           |   |      |      |      |     |
|---------------------------|---|---|--------|-----|------------------------------|-----------|---|------|------|------|-----|
| MEGDLNEMEIQLSHANR         | K | M | 95.00% | 68  | M1: Oxidation                | 673.6376  | 3 | 3.0  | 1618 | 1634 | Yes |
| MEGDLNEMEIQLSHANR         | K | M | 95.00% | 88  | M1: Oxidation, M8: Oxidation | 1009.9510 | 2 | 1.6  | 1618 | 1634 | Yes |
| MEGDLNEMEIQLSHANR         | K | M | 95.00% | 68  | M1: Oxidation, M8: Oxidation | 673.6376  | 3 | 3.0  | 1618 | 1634 | Yes |
| MEGDLNEMEIQLSHANR         | K | M | 95.00% | 83  | M8: Oxidation                | 1001.9580 | 2 | 6.4  | 1618 | 1634 | Yes |
| MEGDLNEMEIQLSHANR         | K | M | 95.00% | 45  | M8: Oxidation                | 668.3068  | 3 | 4.3  | 1618 | 1634 | Yes |
| MEGDLNEMEIQLSHANR         | K | M | 95.00% | 148 |                              | 993.9626  | 2 | 8.0  | 1618 | 1634 | Yes |
| MEGDLNEMEIQLSHANR         | K | M | 95.00% | 83  |                              | 662.9764  | 3 | 6.1  | 1618 | 1634 | Yes |
| MELQSALEEAASLEHEEGK       | K | I | 95.00% | 143 | M1: Oxidation                | 1123.5220 | 2 | 9.7  | 1538 | 1557 | No  |
| MELQSALEEAASLEHEEGK       | K | I | 95.00% | 73  | M1: Oxidation                | 749.3466  | 3 | 4.8  | 1538 | 1557 | No  |
| MELQSALEEAASLEHEEGK       | K | I | 95.00% | 129 |                              | 1115.5240 | 2 | 10.0 | 1538 | 1557 | No  |
| MELQSALEEAASLEHEEGK       | K | I | 95.00% | 70  |                              | 744.0148  | 3 | 4.6  | 1538 | 1557 | No  |
| MFNWMVTR                  | R | I | 95.00% | 47  | M1: Oxidation                | 550.7566  | 2 | 3.1  | 435  | 442  | No  |
| MFNWMVTR                  | R | I | 95.00% | 56  | M1: Oxidation                | 558.7542  | 2 | 3.2  | 435  | 442  | No  |
| MFNWMVTR                  | R | I | 95.00% | 56  | M1: Oxidation, M5: Oxidation | 558.7542  | 2 | 3.2  | 435  | 442  | No  |
| MFNWMVTR                  | R | I | 95.00% | 54  | M5: Oxidation                | 550.7580  | 2 | 5.5  | 435  | 442  | No  |
| MFNWMVTR                  | R | I | 95.00% | 35  |                              | 1084.5120 | 1 | 4.2  | 435  | 442  | No  |
| MFNWMVTR                  | R | I | 95.00% | 52  |                              | 542.7602  | 2 | 5.1  | 435  | 442  | No  |
| MVSLLOEK                  | K | N | 95.00% | 53  | M1: Oxidation                | 963.5215  | 1 | 3.1  | 877  | 884  | Yes |
| MVSLLOEK                  | K | N | 95.00% | 53  | M1: Oxidation                | 482.2638  | 2 | 1.3  | 877  | 884  | Yes |
| MVSLLOEK                  | K | N | 95.00% | 48  |                              | 947.5253  | 1 | 1.7  | 877  | 884  | Yes |
| MVSLLOEK                  | K | N | 95.00% | 55  |                              | 474.2693  | 2 | 7.7  | 877  | 884  | Yes |
| NALAHALQSAR               | K | H | 95.00% | 47  |                              | 1151.6330 | 1 | 4.3  | 1327 | 1337 | Yes |
| NALAHALQSAR               | K | H | 95.00% | 80  |                              | 576.3195  | 2 | 2.2  | 1327 | 1337 | Yes |
| NAYEESLEHLETFK            | K | R | 95.00% | 112 |                              | 855.4108  | 2 | 6.8  | 1486 | 1499 | Yes |
| NAYEESLEHLETFK            | K | R | 95.00% | 47  |                              | 570.6091  | 3 | 5.5  | 1486 | 1499 | Yes |
| NAYEESLEHLETFK            | K | E | 95.00% | 102 |                              | 933.4626  | 2 | 7.5  | 1486 | 1500 | Yes |
| NAYEESLEHLETFK            | K | E | 95.00% | 51  |                              | 622.6431  | 3 | 5.5  | 1486 | 1500 | Yes |
| NDLQLQVQAEQDNLADAEER      | K | C | 95.00% | 169 |                              | 1150.0540 | 2 | 8.4  | 885  | 904  | No  |
| NDLQLQVQAEQDNLADAEER      | K | C | 95.00% | 106 |                              | 767.0347  | 3 | 3.6  | 885  | 904  | No  |
| NFDKILAEWK                | R | Q | 95.00% | 40  |                              | 632.3444  | 2 | 5.5  | 1448 | 1457 | Yes |
| NFDKILAEWK                | R | Q | 95.00% | 30  |                              | 421.8982  | 3 | 4.0  | 1448 | 1457 | Yes |
| NKDPLNETVGLYQK            | K | S | 95.00% | 121 |                              | 859.4654  | 2 | 6.0  | 597  | 611  | Yes |
| NKDPLNETVGLYQK            | K | S | 95.00% | 75  |                              | 573.3107  | 3 | 2.1  | 597  | 611  | Yes |
| NLQEEISDLTEQLGSSGK        | K | T | 95.00% | 163 |                              | 974.4875  | 2 | 8.1  | 1504 | 1521 | No  |
| NLQEEISDLTEQLGSSGK        | K | T | 95.00% | 90  |                              | 649.9916  | 3 | 4.1  | 1504 | 1521 | No  |
| NLTEEMAGLDEIIAK           | K | L | 95.00% | 114 | M6: Oxidation                | 831.9211  | 2 | 4.9  | 977  | 991  | Yes |
| NLTEEMAGLDEIIAK           | K | L | 95.00% | 71  | M6: Oxidation                | 554.9494  | 3 | 3.8  | 977  | 991  | Yes |
| NLTEEMAGLDEIIAK           | K | L | 95.00% | 117 |                              | 823.9225  | 2 | 3.6  | 977  | 991  | Yes |
| NLTEEMAGLDEIIAK           | K | L | 95.00% | 84  |                              | 549.6174  | 3 | 3.1  | 977  | 991  | Yes |
| NMEQTIK                   | K | D | 95.00% | 32  | M2: Oxidation                | 440.2186  | 2 | 5.4  | 1785 | 1791 | Yes |
| NMEQTIKDLQHR              | K | L | 95.00% | 39  | M2: Oxidation                | 764.8834  | 2 | 3.0  | 1785 | 1796 | Yes |
| NNLLQAELEELR              | R | A | 95.00% | 115 |                              | 721.3893  | 2 | 3.9  | 1678 | 1689 | Yes |
| NNLLQAELEELR              | R | A | 95.00% | 96  |                              | 481.2624  | 3 | 4.5  | 1678 | 1689 | Yes |
| NNLLQAELEELRAVVEQTER      | R | S | 95.00% | 72  |                              | 785.4218  | 3 | 7.7  | 1678 | 1697 | Yes |
| NWPWMK                    | K | L | 95.00% | 29  |                              | 431.2093  | 2 | 3.1  | 826  | 831  | Yes |
| QAEEAAEQANTNLSK           | R | F | 95.00% | 117 |                              | 831.3911  | 2 | 7.6  | 1881 | 1895 | Yes |
| QAEEAAEQANTNLSK           | R | F | 95.00% | 64  |                              | 554.5937  | 3 | 2.1  | 1881 | 1895 | Yes |
| QKYEESQSELESSQK           | K | E | 95.00% | 99  |                              | 900.4216  | 2 | 3.0  | 1458 | 1472 | Yes |
| QKYEESQSELESSQK           | K | E | 95.00% | 59  |                              | 600.6168  | 3 | 2.6  | 1458 | 1472 | Yes |
| QLDEKALISOLTR             | R | G | 95.00% | 112 |                              | 822.4584  | 2 | 7.2  | 1290 | 1303 | No  |
| QLDEKALISOLTR             | R | G | 95.00% | 73  |                              | 548.6397  | 3 | 3.9  | 1290 | 1303 | No  |
| QLEAEKMELQSALEEAASLEHEEGK | K | I | 95.00% | 91  | M7: Oxidation                | 982.1372  | 3 | 7.7  | 1532 | 1557 | No  |
| QLEAEKMELQSALEEAASLEHEEGK | K | I | 95.00% | 61  | M7: Oxidation                | 736.8535  | 4 | 5.9  | 1532 | 1557 | No  |
| QLEEEVK                   | R | A | 95.00% | 37  |                              | 437.7308  | 2 | 1.7  | 1318 | 1324 | No  |
| QREEQAEPDGTEEDK           | K | S | 95.00% | 47  |                              | 916.4064  | 2 | 5.5  | 368  | 383  | No  |
| QREEQAEPDGTEEDK           | K | S | 95.00% | 40  |                              | 611.2758  | 3 | 9.2  | 368  | 383  | No  |
| QREEQAEPDGTEEDKSAYLM      |   |   |        |     |                              |           |   |      |      |      |     |
| GLNSADLLK                 | K | G | 95.00% | 81  | M21: Oxidation               | 1108.8660 | 3 | 8.2  | 368  | 397  | No  |
| QREEQAEPDGTEEDKSAYLM      |   |   |        |     |                              |           |   |      |      |      |     |
| GLNSADLLK                 | K | G | 95.00% | 62  |                              | 1103.5350 | 3 | 9.4  | 368  | 397  | No  |
| QREEQAEPDGTEEDKSAYLM      |   |   |        |     |                              |           |   |      |      |      |     |
| GLNSADLLK                 | K | G | 95.00% | 40  |                              | 827.9004  | 4 | 5.7  | 368  | 397  | No  |
| RDLEEATLQHEATAAALR        | R | K | 95.00% | 119 |                              | 998.0237  | 2 | 6.8  | 1176 | 1193 | Yes |
| RDLEEATLQHEATAAALR        | R | K | 95.00% | 84  |                              | 665.6832  | 3 | 3.9  | 1176 | 1193 | Yes |
| RDLEEATLQHEATAAALR        | R | K | 95.00% | 65  |                              | 499.5138  | 4 | 2.9  | 1176 | 1193 | Yes |

|                        |   |   |        |     |                                  |           |   |     |      |      |     |
|------------------------|---|---|--------|-----|----------------------------------|-----------|---|-----|------|------|-----|
| RDSLLVIQWNIR           | R | A | 95.00% | 53  |                                  | 756.9397  | 2 | 4.2 | 808  | 819  | No  |
| RDSLLVIQWNIR           | R | A | 95.00% | 46  |                                  | 504.9620  | 3 | 3.5 | 808  | 819  | No  |
| RNNLLQAELEELR          | R | A | 95.00% | 81  |                                  | 799.4423  | 2 | 6.6 | 1677 | 1689 | Yes |
| RNNLLQAELEELR          | R | A | 95.00% | 88  |                                  | 533.2958  | 3 | 3.4 | 1677 | 1689 | Yes |
| RQAEAEQANTNLSK         | K | F | 95.00% | 75  |                                  | 909.4435  | 2 | 9.0 | 1880 | 1895 | Yes |
| RQAEAEQANTNLSK         | K | F | 95.00% | 47  |                                  | 606.6296  | 3 | 5.7 | 1880 | 1895 | Yes |
| RSEAPPHIFSISDNAYQMLTDR | K | E | 95.00% | 118 | M19: Oxidation                   | 909.7731  | 3 | 7.4 | 147  | 169  | Yes |
| RSEAPPHIFSISDNAYQMLTDR | K | E | 95.00% | 50  | M19: Oxidation                   | 682.5812  | 4 | 6.5 | 147  | 169  | Yes |
| RSEAPPHIFSISDNAYQMLTDR | K | E | 95.00% | 125 |                                  | 904.4421  | 3 | 8.1 | 147  | 169  | Yes |
| RSEAPPHIFSISDNAYQMLTDR | K | E | 95.00% | 45  |                                  | 678.5836  | 4 | 8.3 | 147  | 169  | Yes |
| RSEAPPHIFSISDNAYQMLTDR | K | T | 95.00% | 56  | M19: Oxidation                   | 1053.7730 | 4 | 8.6 | 147  | 184  | Yes |
| RSEAPPHIFSISDNAYQMLTDR | K | T | 95.00% | 77  |                                  | 1049.7750 | 4 | 9.3 | 147  | 184  | Yes |
| RVIQYFAVIAAIGDR        | K | S | 95.00% | 86  |                                  | 846.4896  | 2 | 6.9 | 190  | 204  | No  |
| RVIQYFAVIAAIGDR        | K | S | 95.00% | 60  |                                  | 564.6616  | 3 | 5.4 | 190  | 204  | No  |
| SAYLMGLNSADLLK         | K | G | 95.00% | 105 | M5: Oxidation                    | 756.3973  | 2 | 5.7 | 384  | 397  | Yes |
| SAYLMGLNSADLLK         | K | G | 95.00% | 88  |                                  | 748.3988  | 2 | 4.4 | 384  | 397  | Yes |
| SEAPPHIFSISDNAYQMLTDR  | R | E | 95.00% | 84  | M18: Oxidation                   | 857.7385  | 3 | 6.8 | 148  | 169  | Yes |
| SEAPPHIFSISDNAYQMLTDR  | R | E | 95.00% | 78  |                                  | 852.4084  | 3 | 8.7 | 148  | 169  | Yes |
| SEAPPHIFSISDNAYQMLTDR  | R | T | 95.00% | 37  | M18: Oxidation                   | 1014.7450 | 4 | 6.5 | 148  | 184  | Yes |
| SEFKLEDDVTSNMEQIIK     | K | A | 95.00% | 127 | M14: Oxidation                   | 1128.0700 | 2 | 9.4 | 1222 | 1240 | Yes |
| SEFKLEDDVTSNMEQIIK     | K | A | 95.00% | 57  | M14: Oxidation                   | 752.3806  | 3 | 6.4 | 1222 | 1240 | Yes |
| SEFKLEDDVTSNMEQIIK     | K | A | 95.00% | 146 |                                  | 1120.0710 | 2 | 7.3 | 1222 | 1240 | Yes |
| SEFKLEDDVTSNMEQIIK     | K | A | 95.00% | 61  |                                  | 747.0488  | 3 | 6.1 | 1222 | 1240 | Yes |
| SKAEETQR               | R | S | 95.00% | 37  |                                  | 474.7449  | 2 | 7.4 | 1261 | 1268 | No  |
| SLQSLKDTQIQLDDAVR      | K | A | 95.00% | 54  |                                  | 681.7121  | 3 | 5.8 | 1645 | 1662 | Yes |
| SLSTELFK               | R | L | 95.00% | 34  |                                  | 924.5075  | 1 | 3.4 | 1476 | 1483 | Yes |
| SLSTELFK               | R | L | 95.00% | 68  |                                  | 462.7583  | 2 | 4.8 | 1476 | 1483 | Yes |
| SNAAAAALDK             | R | K | 95.00% | 41  |                                  | 466.2493  | 2 | 6.2 | 1435 | 1444 | Yes |
| SNAAAAALDKK            | R | Q | 95.00% | 81  |                                  | 530.2949  | 2 | 2.0 | 1435 | 1445 | Yes |
| SPGVMDNPLVMHQLR        | K | C | 95.00% | 70  | M11: Oxidation                   | 855.4329  | 2 | 6.4 | 680  | 694  | No  |
| SPGVMDNPLVMHQLR        | K | C | 95.00% | 59  | M11: Oxidation                   | 570.6229  | 3 | 3.6 | 680  | 694  | No  |
| SPGVMDNPLVMHQLR        | K | C | 95.00% | 64  | M5: Oxidation                    | 855.4329  | 2 | 6.4 | 680  | 694  | No  |
| SPGVMDNPLVMHQLR        | K | C | 95.00% | 64  | M5: Oxidation                    | 570.6230  | 3 | 3.7 | 680  | 694  | No  |
| SPGVMDNPLVMHQLR        | K | C | 95.00% | 77  | M5: Oxidation                    | 863.4288  | 2 | 4.6 | 680  | 694  | No  |
| SPGVMDNPLVMHQLR        | K | C | 95.00% | 69  | M5: Oxidation                    | 575.9540  | 3 | 2.8 | 680  | 694  | No  |
| SPGVMDNPLVMHQLR        | K | C | 95.00% | 77  | M5: Oxidation,<br>M11: Oxidation | 863.4288  | 2 | 4.6 | 680  | 694  | No  |
| SPGVMDNPLVMHQLR        | K | C | 95.00% | 69  | M11: Oxidation                   | 575.9540  | 3 | 2.8 | 680  | 694  | No  |
| SPGVMDNPLVMHQLR        | K | C | 95.00% | 91  |                                  | 847.4324  | 2 | 3.0 | 680  | 694  | No  |
| SPGVMDNPLVMHQLR        | K | C | 95.00% | 70  |                                  | 565.2923  | 3 | 5.5 | 680  | 694  | No  |
| SRVIFOLK               | K | A | 95.00% | 30  |                                  | 495.8115  | 2 | 5.2 | 271  | 278  | Yes |
| STHPHFVR               | R | C | 95.00% | 32  |                                  | 490.7590  | 2 | 3.7 | 664  | 671  | Yes |
| SVNDLTSQR              | R | A | 95.00% | 58  |                                  | 510.2636  | 2 | 7.2 | 1269 | 1277 | No  |
| TEELEAAK               | R | K | 95.00% | 33  |                                  | 948.4558  | 1 | 3.3 | 1383 | 1390 | Yes |
| TEELEAAK               | R | K | 95.00% | 39  |                                  | 474.7330  | 2 | 5.9 | 1383 | 1390 | Yes |
| TEELEAAK               | R | K | 95.00% | 40  |                                  | 538.7797  | 2 | 3.5 | 1383 | 1391 | Yes |
| TIHELEK                | K | V | 95.00% | 31  |                                  | 435.2440  | 2 | 7.9 | 1522 | 1528 | No  |
| TKYETDAIQR             | R | T | 95.00% | 69  |                                  | 612.8171  | 2 | 3.2 | 1373 | 1382 | Yes |
| TKYETDAIQR             | R | T | 95.00% | 55  |                                  | 408.8806  | 3 | 3.1 | 1373 | 1382 | Yes |
| TKYETDAIQRTEELEAAK     | R | K | 95.00% | 74  |                                  | 1077.5420 | 2 | 8.6 | 1373 | 1390 | Yes |
| TKYETDAIQRTEELEAAK     | R | K | 95.00% | 38  |                                  | 718.6949  | 3 | 5.7 | 1373 | 1390 | Yes |
| TKYETDAIQRTEELEAAK     | R | K | 95.00% | 31  |                                  | 539.2729  | 4 | 5.3 | 1373 | 1390 | Yes |
| TLEDQMNEHR             | R | S | 95.00% | 59  | M6: Oxidation                    | 644.7856  | 2 | 3.2 | 1251 | 1260 | No  |
| TLEDQMNEHR             | R | S | 95.00% | 65  |                                  | 636.7876  | 2 | 2.3 | 1251 | 1260 | No  |
| TLEDQMNEHR             | R | S | 95.00% | 33  |                                  | 424.8611  | 3 | 2.4 | 1251 | 1260 | No  |
| TVTVK                  | K | E | 95.00% | 29  |                                  | 547.3508  | 1 | 9.6 | 68   | 72   | No  |
| TVTVKEDQVMQNPCK        | K | F | 95.00% | 85  | M10: Oxidation                   | 929.4758  | 2 | 3.0 | 68   | 83   | No  |
| TVTVKEDQVMQNPCK        | K | F | 95.00% | 61  | M10: Oxidation                   | 619.9860  | 3 | 2.3 | 68   | 83   | No  |
| TVTVKEDQVMQNPCK        | K | F | 95.00% | 99  |                                  | 921.4797  | 2 | 4.4 | 68   | 83   | No  |
| TVTVKEDQVMQNPCK        | K | F | 95.00% | 50  |                                  | 614.6577  | 3 | 7.6 | 68   | 83   | No  |
| TVTVKEDQVMQNPCKFDK     | K | I | 95.00% | 48  | M10: Oxidation                   | 750.0507  | 3 | 3.6 | 68   | 86   | No  |
| TVTVKEDQVMQNPCKFDK     | K | I | 95.00% | 53  |                                  | 744.7178  | 3 | 2.0 | 68   | 86   | No  |

|     |                                       |        |                                                                                                               |                          |   |   |        |     |                                  |           |   |     |      |      |     |
|-----|---------------------------------------|--------|---------------------------------------------------------------------------------------------------------------|--------------------------|---|---|--------|-----|----------------------------------|-----------|---|-----|------|------|-----|
|     |                                       |        |                                                                                                               | VGNEYVTK                 | K | G | 95.00% | 69  |                                  | 455.2391  | 2 | 2.3 | 406  | 413  | Yes |
|     |                                       |        |                                                                                                               | VGNEYVTKGQNVQQVIYATGALAK | K | A | 95.00% | 61  |                                  | 851.1287  | 3 | 7.3 | 406  | 429  | No  |
|     |                                       |        |                                                                                                               | VIFQLK                   | R | A | 95.00% | 31  |                                  | 747.4807  | 1 | 5.0 | 273  | 278  | Yes |
|     |                                       |        |                                                                                                               | VIQYFAVIAAIGDR           | R | S | 95.00% | 129 |                                  | 768.4374  | 2 | 5.4 | 191  | 204  | No  |
|     |                                       |        |                                                                                                               | VIQYFAVIAAIGDR           | R | S | 95.00% | 65  |                                  | 512.6281  | 3 | 6.6 | 191  | 204  | No  |
|     |                                       |        |                                                                                                               | VKEMNERLEDEEEMNAELTAK    | K | K | 95.00% | 69  | M14: Oxidation                   | 842.0610  | 3 | 5.1 | 919  | 939  | Yes |
|     |                                       |        |                                                                                                               | VKEMNERLEDEEEMNAELTAK    | K | K | 95.00% | 40  | M14: Oxidation                   | 631.7974  | 4 | 4.5 | 919  | 939  | Yes |
|     |                                       |        |                                                                                                               | VKEMNERLEDEEEMNAELTAK    | K | K | 95.00% | 63  | M4: Oxidation                    | 842.0579  | 3 | 1.5 | 919  | 939  | Yes |
|     |                                       |        |                                                                                                               | VKEMNERLEDEEEMNAELTAK    | K | K | 95.00% | 37  | M4: Oxidation<br>M4: Oxidation,  | 635.7957  | 4 | 3.9 | 919  | 939  | Yes |
|     |                                       |        |                                                                                                               | VKEMNERLEDEEEMNAELTAK    | K | K | 95.00% | 50  | M14: Oxidation<br>M4: Oxidation, | 847.3940  | 3 | 6.7 | 919  | 939  | Yes |
|     |                                       |        |                                                                                                               | VKEMNERLEDEEEMNAELTAK    | K | K | 95.00% | 37  | M14: Oxidation<br>M4: Oxidation, | 635.7957  | 4 | 3.9 | 919  | 939  | Yes |
|     |                                       |        |                                                                                                               | VKEMNERLEDEEEMNAELTAK    | K | K | 95.00% | 57  |                                  | 836.7292  | 3 | 5.0 | 919  | 939  | Yes |
|     |                                       |        |                                                                                                               | VKLEQQVDDLEGSLEQEK       | K | K | 95.00% | 157 |                                  | 1044.0380 | 2 | 8.1 | 1025 | 1042 | Yes |
|     |                                       |        |                                                                                                               | VKLEQQVDDLEGSLEQEK       | K | K | 95.00% | 68  |                                  | 696.3594  | 3 | 5.5 | 1025 | 1042 | Yes |
|     |                                       |        |                                                                                                               | VKLEQQVDDLEGSLEQEK       | K | V | 95.00% | 136 |                                  | 1108.0860 | 2 | 8.3 | 1025 | 1043 | Yes |
|     |                                       |        |                                                                                                               | VKLEQQVDDLEGSLEQEK       | K | V | 95.00% | 87  |                                  | 739.0583  | 3 | 6.1 | 1025 | 1043 | Yes |
|     |                                       |        |                                                                                                               | VKLEQQVDDLEGSLEQEK       | K | V | 95.00% | 47  |                                  | 554.5450  | 4 | 4.7 | 1025 | 1043 | Yes |
|     |                                       |        |                                                                                                               | VKNLTEEMAGLDEIIAK        | K | L | 95.00% | 77  | M8: Oxidation                    | 945.5076  | 2 | 9.3 | 975  | 991  | Yes |
|     |                                       |        |                                                                                                               | VKNLTEEMAGLDEIIAK        | K | L | 95.00% | 32  | M8: Oxidation                    | 630.6721  | 3 | 5.7 | 975  | 991  | Yes |
|     |                                       |        |                                                                                                               | VKNLTEEMAGLDEIIAK        | K | L | 95.00% | 121 |                                  | 937.5083  | 2 | 7.4 | 975  | 991  | Yes |
|     |                                       |        |                                                                                                               | VKNLTEEMAGLDEIIAK        | K | L | 95.00% | 54  |                                  | 625.3402  | 3 | 5.4 | 975  | 991  | Yes |
|     |                                       |        |                                                                                                               | VKVGNEYVTK               | R | G | 95.00% | 59  |                                  | 568.8224  | 2 | 4.7 | 404  | 413  | Yes |
|     |                                       |        |                                                                                                               | VQHELDEAEER              | K | A | 95.00% | 52  |                                  | 677.8201  | 2 | 6.2 | 1899 | 1909 | Yes |
|     |                                       |        |                                                                                                               | VQHELDEAEER              | K | A | 95.00% | 35  |                                  | 452.2151  | 3 | 4.1 | 1899 | 1909 | Yes |
|     |                                       |        |                                                                                                               | VQHELDEAEERADIAESQVVK    | K | L | 95.00% | 119 |                                  | 1205.5860 | 2 | 6.5 | 1899 | 1919 | Yes |
|     |                                       |        |                                                                                                               | VQHELDEAEERADIAESQVVK    | K | L | 95.00% | 67  |                                  | 804.0601  | 3 | 6.6 | 1899 | 1919 | Yes |
|     |                                       |        |                                                                                                               | VQHELDEAEERADIAESQVVK    | K | L | 95.00% | 61  |                                  | 603.2958  | 4 | 4.6 | 1899 | 1919 | Yes |
|     |                                       |        |                                                                                                               | VQLLSQNTSLINQK           | R | K | 95.00% | 119 |                                  | 861.9822  | 2 | 3.7 | 1713 | 1727 | Yes |
|     |                                       |        |                                                                                                               | VQLLSQNTSLINQK           | R | K | 95.00% | 59  |                                  | 574.9913  | 3 | 4.7 | 1713 | 1727 | Yes |
|     |                                       |        |                                                                                                               | VQLLSQNTSLINQK           | R | K | 95.00% | 37  |                                  | 617.6885  | 3 | 2.4 | 1713 | 1728 | Yes |
|     |                                       |        |                                                                                                               | VRELENELEAEQK            | R | R | 95.00% | 86  |                                  | 793.9081  | 2 | 3.5 | 1819 | 1831 | No  |
|     |                                       |        |                                                                                                               | VRELENELEAEQK            | R | R | 95.00% | 42  |                                  | 529.6079  | 3 | 3.4 | 1819 | 1831 | No  |
|     |                                       |        |                                                                                                               | VRELENELEAEQKR           | R | N | 95.00% | 101 |                                  | 871.9578  | 2 | 2.3 | 1819 | 1832 | No  |
|     |                                       |        |                                                                                                               | VRELENELEAEQKR           | R | N | 95.00% | 78  |                                  | 581.6412  | 3 | 2.4 | 1819 | 1832 | No  |
|     |                                       |        |                                                                                                               | VRELENELEAEQKR           | R | N | 95.00% | 41  |                                  | 436.4836  | 4 | 4.0 | 1819 | 1832 | No  |
|     |                                       |        |                                                                                                               | VTAETGYGK                | K | T | 95.00% | 50  |                                  | 499.2475  | 2 | 2.9 | 59   | 67   | No  |
|     |                                       |        |                                                                                                               | VVDSLQTSLDAETR           | R | S | 95.00% | 138 |                                  | 767.3948  | 2 | 3.7 | 1593 | 1606 | Yes |
|     |                                       |        |                                                                                                               | VVDSLQTSLDAETR           | R | S | 95.00% | 72  |                                  | 511.9321  | 3 | 2.9 | 1593 | 1606 | Yes |
|     |                                       |        |                                                                                                               | YEESQSELESSQK            | K | E | 95.00% | 113 |                                  | 772.3474  | 2 | 6.9 | 1460 | 1472 | Yes |
|     |                                       |        |                                                                                                               | YETDAIQR                 | K | T | 95.00% | 34  |                                  | 498.2464  | 2 | 5.1 | 1375 | 1382 | Yes |
| 199 | IPI00025974                           | CHMP4B | CHARGED MULTIVESICULAR BODY PROTEIN 4B.                                                                       | EALENANTNTEVLK           | R | N | 95.00% | 75  |                                  | 773.3981  | 2 | 8.0 | 94   | 107  | No  |
|     |                                       |        |                                                                                                               | GGPTPQEAQR               | K | L | 95.00% | 48  |                                  | 577.3055  | 2 | 5.5 | 18   | 28   | No  |
|     |                                       |        |                                                                                                               | KIEQELTAAK               | K | K | 95.00% | 30  |                                  | 565.8277  | 2 | 4.6 | 46   | 55   | No  |
|     |                                       |        |                                                                                                               | QLAQIDGTLSTIEFOR         | K | E | 95.00% | 108 |                                  | 910.4897  | 2 | 8.7 | 78   | 93   | No  |
|     |                                       |        |                                                                                                               | QLAQIDGTLSTIEFOR         | K | E | 95.00% | 34  |                                  | 607.3263  | 3 | 4.2 | 78   | 93   | No  |
| 200 | IPI00026154; IPI00792916; IPI00829824 | PRKCSH | GLUCOSIDASE 2 SUBUNIT BETA PRECURSOR;<br>GLUCOSIDASE II BETA SUBUNIT PRECURSOR;<br>HAPLN4 PROTEIN (FRAGMENT). | AQQEQELAADAFK            | K | E | 95.00% | 61  |                                  | 724.8562  | 2 | 1.6 | 207  | 219  | No  |
|     |                                       |        |                                                                                                               | ESLQQMAEVTR              | R | E | 95.00% | 31  | M6: Oxidation                    | 654.3234  | 2 | 9.4 | 125  | 135  | No  |
|     |                                       |        |                                                                                                               | LWEEQLAAAK               | K | A | 95.00% | 42  |                                  | 579.8146  | 2 | 4.5 | 197  | 206  | No  |
|     |                                       |        |                                                                                                               | SLEDQVEMLR               | K | T | 95.00% | 60  | M8: Oxidation                    | 618.3043  | 2 | 5.3 | 168  | 177  | No  |
| 201 | IPI00026185                           | CAPZB  | ISOFORM 1 OF F-ACTIN CAPPING PROTEIN<br>SUBUNIT BETA.                                                         | SGSGTMNLGGSLTR           | K | Q | 95.00% | 47  | M6: Oxidation                    | 677.3315  | 2 | 8.8 | 182  | 195  | No  |
|     |                                       |        |                                                                                                               | STLNEIFYGK               | R | T | 95.00% | 56  |                                  | 586.3090  | 2 | 8.6 | 226  | 235  | No  |
| 202 | IPI00026216                           | NPEPPS | PUROMYCIN-SENSITIVE AMINOPEPTIDASE.                                                                           | AGIISTVEVLK              | R | V | 95.00% | 80  |                                  | 565.3500  | 2 | 7.8 | 628  | 638  | No  |
|     |                                       |        |                                                                                                               | AQELDALDNSHPIEVSVGHPSEV  | R | G | 95.00% | 51  |                                  | 928.7051  | 4 | 8.2 | 407  | 440  | No  |
|     |                                       |        |                                                                                                               | DEIFDAISYSK              | K | D | 95.00% | 76  |                                  | 595.3480  | 2 | 4.0 | 198  | 208  | No  |
|     |                                       |        |                                                                                                               | DAESIHQYLLQR             | R | K | 95.00% | 85  |                                  | 736.8814  | 2 | 3.5 | 901  | 912  | No  |
|     |                                       |        |                                                                                                               | DAESIHQYLLQR             | R | K | 95.00% | 56  |                                  | 491.5903  | 3 | 3.7 | 901  | 912  | No  |

|     |                                                                                                                                               |  |                       |                                                                                                                                                                                                                                                                                             |   |        |        |     |                              |           |   |     |     |     |    |  |
|-----|-----------------------------------------------------------------------------------------------------------------------------------------------|--|-----------------------|---------------------------------------------------------------------------------------------------------------------------------------------------------------------------------------------------------------------------------------------------------------------------------------------|---|--------|--------|-----|------------------------------|-----------|---|-----|-----|-----|----|--|
|     |                                                                                                                                               |  |                       | DLSLPPVDR                                                                                                                                                                                                                                                                                   | R | L      | 95.00% | 33  |                              | 506.2807  | 2 | 5.9 | 607 | 615 | No |  |
|     |                                                                                                                                               |  |                       | DNWEELYNR                                                                                                                                                                                                                                                                                   | K | Y      | 95.00% | 50  |                              | 619.7789  | 2 | 4.6 | 833 | 841 | No |  |
|     |                                                                                                                                               |  |                       | DVFSPIGER                                                                                                                                                                                                                                                                                   | K | L      | 95.00% | 31  |                              | 510.2636  | 2 | 3.0 | 681 | 689 | No |  |
|     |                                                                                                                                               |  |                       | DYFNVPYLPK                                                                                                                                                                                                                                                                                  | K | I      | 95.00% | 71  |                              | 676.8511  | 2 | 3.8 | 294 | 304 | No |  |
|     |                                                                                                                                               |  |                       | ETALLIDPK                                                                                                                                                                                                                                                                                   | R | N      | 95.00% | 27  |                              | 999.5811  | 1 | 8.3 | 328 | 336 | No |  |
|     |                                                                                                                                               |  |                       | ETALLIDPK                                                                                                                                                                                                                                                                                   | R | N      | 95.00% | 43  |                              | 500.2929  | 2 | 5.2 | 328 | 336 | No |  |
|     |                                                                                                                                               |  |                       | FIKDNWEELYNR                                                                                                                                                                                                                                                                                | K | Y      | 95.00% | 56  |                              | 813.9037  | 2 | 4.8 | 830 | 841 | No |  |
|     |                                                                                                                                               |  |                       | FIKDNWEELYNR                                                                                                                                                                                                                                                                                | K | Y      | 95.00% | 44  |                              | 542.9380  | 3 | 4.1 | 830 | 841 | No |  |
|     |                                                                                                                                               |  |                       | HGDGTTLDIMLK                                                                                                                                                                                                                                                                                | K | L      | 95.00% | 62  |                              | 658.8336  | 2 | 5.4 | 754 | 765 | No |  |
|     |                                                                                                                                               |  |                       | HGDGTTLDIMLK                                                                                                                                                                                                                                                                                | K | L      | 95.00% | 31  | M10: Oxidation               | 439.5586  | 3 | 5.8 | 754 | 765 | No |  |
|     |                                                                                                                                               |  |                       | IDFVGELNDK                                                                                                                                                                                                                                                                                  | K | M      | 95.00% | 61  | M10: Oxidation               | 575.2957  | 2 | 3.6 | 146 | 155 | No |  |
|     |                                                                                                                                               |  |                       |                                                                                                                                                                                                                                                                                             |   |        |        |     |                              |           |   |     |     |     |    |  |
|     |                                                                                                                                               |  |                       | ILMDKPEMNVVK                                                                                                                                                                                                                                                                                | K | N      | 95.00% | 48  | M3: Oxidation, M8: Oxidation | 781.4236  | 2 | 3.9 | 559 | 571 | No |  |
|     |                                                                                                                                               |  |                       | KPYPDENLVEVK                                                                                                                                                                                                                                                                                | R | F      | 95.00% | 59  |                              | 773.3987  | 2 | 6.2 | 222 | 234 | No |  |
|     |                                                                                                                                               |  |                       | LGLQNDLFSLAR                                                                                                                                                                                                                                                                                | R | A      | 95.00% | 95  |                              | 673.8774  | 2 | 2.7 | 616 | 627 | No |  |
|     |                                                                                                                                               |  |                       | LGWDPKPGEGHLDALLR                                                                                                                                                                                                                                                                           | R | G      | 95.00% | 49  |                              | 625.3381  | 3 | 3.0 | 690 | 706 | No |  |
|     |                                                                                                                                               |  |                       | LGWDPKPGEGHLDALLR                                                                                                                                                                                                                                                                           | R | G      | 95.00% | 33  |                              | 469.2571  | 4 | 6.3 | 690 | 706 | No |  |
|     |                                                                                                                                               |  |                       | LNLGTVGFYR                                                                                                                                                                                                                                                                                  | K | T      | 95.00% | 76  |                              | 570.3176  | 2 | 5.2 | 581 | 590 | No |  |
|     |                                                                                                                                               |  |                       | LSVEGFAVDK                                                                                                                                                                                                                                                                                  | K | M      | 95.00% | 53  |                              | 1064.5720 | 1 | 8.3 | 854 | 863 | No |  |
|     |                                                                                                                                               |  |                       | LSVEGFAVDK                                                                                                                                                                                                                                                                                  | K | M      | 95.00% | 71  |                              | 532.7872  | 2 | 3.3 | 854 | 863 | No |  |
|     |                                                                                                                                               |  |                       | LSVEGFAVDKIMAGEVK                                                                                                                                                                                                                                                                           | K | A      | 95.00% | 32  | M11: Oxidation               | 848.4360  | 2 | 0.7 | 854 | 869 | No |  |
|     |                                                                                                                                               |  |                       | MLHDYIGDKDFK                                                                                                                                                                                                                                                                                | R | K      | 95.00% | 41  | M1: Oxidation                | 749.3592  | 2 | 3.8 | 447 | 458 | No |  |
|     |                                                                                                                                               |  |                       | MLHDYIGDKDFK                                                                                                                                                                                                                                                                                | R | G      | 95.00% | 44  | M1: Oxidation                | 813.4092  | 2 | 6.5 | 447 | 459 | No |  |
|     |                                                                                                                                               |  |                       | NAATEDLWESLENASGKPIAAV                                                                                                                                                                                                                                                                      |   |        |        |     |                              |           |   |     |     |     |    |  |
|     |                                                                                                                                               |  |                       | MNTWTK                                                                                                                                                                                                                                                                                      | K | Q      | 95.00% | 89  | M23: Oxidation               | 1021.8380 | 3 | 8.2 | 472 | 499 | No |  |
|     |                                                                                                                                               |  |                       | QILSADLR                                                                                                                                                                                                                                                                                    | K | S      | 95.00% | 47  |                              | 458.2695  | 2 | 5.2 | 737 | 744 | No |  |
|     |                                                                                                                                               |  |                       | QMGFPLIYVEAEQVEDRLLR                                                                                                                                                                                                                                                                        | K | L      | 95.00% | 60  | M2: Oxidation                | 846.4355  | 3 | 7.9 | 500 | 520 | No |  |
|     |                                                                                                                                               |  |                       | SKYTPSGEVR                                                                                                                                                                                                                                                                                  | R | Y      | 95.00% | 30  |                              | 612.8193  | 2 | 6.9 | 162 | 172 | No |  |
|     |                                                                                                                                               |  |                       | SPVYLTVLK                                                                                                                                                                                                                                                                                   | R | H      | 95.00% | 56  |                              | 510.3117  | 2 | 1.4 | 745 | 753 | No |  |
|     |                                                                                                                                               |  |                       | TQYSSAMLESLLPGIR                                                                                                                                                                                                                                                                            | R | D      | 95.00% | 88  | M7: Oxidation                | 891.4648  | 2 | 6.1 | 591 | 606 | No |  |
|     |                                                                                                                                               |  |                       | TQYSSAMLESLLPGIR                                                                                                                                                                                                                                                                            | R | D      | 95.00% | 63  | M7: Oxidation                | 594.6458  | 3 | 6.2 | 591 | 606 | No |  |
|     |                                                                                                                                               |  |                       | VALSNMNVIDR                                                                                                                                                                                                                                                                                 | R | K      | 95.00% | 58  | M6: Oxidation                | 624.3263  | 2 | 2.3 | 211 | 221 | No |  |
|     |                                                                                                                                               |  |                       | VLGATLLPDLIQ                                                                                                                                                                                                                                                                                | R | V      | 95.00% | 117 |                              | 690.9291  | 2 | 2.6 | 782 | 794 | No |  |
|     |                                                                                                                                               |  |                       | VLGATLLPDLIQ                                                                                                                                                                                                                                                                                | R | V      | 95.00% | 51  |                              | 460.9568  | 3 | 5.7 | 782 | 794 | No |  |
|     |                                                                                                                                               |  |                       | VLTFALSEEVRPQDTVSVIGGVA                                                                                                                                                                                                                                                                     |   |        |        |     |                              |           |   |     |     |     |    |  |
|     |                                                                                                                                               |  |                       | GGSK                                                                                                                                                                                                                                                                                        | K | H      | 95.00% | 59  |                              | 906.1621  | 3 | 6.8 | 795 | 821 | No |  |
|     |                                                                                                                                               |  |                       | VTLSPFSTLQTGTGTLK                                                                                                                                                                                                                                                                           | K | I      | 95.00% | 78  |                              | 875.9905  | 2 | 7.8 | 129 | 145 | No |  |
|     |                                                                                                                                               |  |                       | YAAVTFEATDAR                                                                                                                                                                                                                                                                                | R | R      | 95.00% | 105 |                              | 721.8515  | 2 | 2.5 | 173 | 185 | No |  |
|     |                                                                                                                                               |  |                       | YAAVTFEATDARR                                                                                                                                                                                                                                                                               | R | A      | 95.00% | 34  |                              | 799.9039  | 2 | 4.5 | 173 | 186 | No |  |
|     |                                                                                                                                               |  |                       | YQGGFLISR                                                                                                                                                                                                                                                                                   | R | L      | 95.00% | 63  |                              | 520.7816  | 2 | 2.3 | 842 | 850 | No |  |
|     |                                                                                                                                               |  |                       | ELGITALHIK                                                                                                                                                                                                                                                                                  | K | L      | 95.00% | 33  |                              | 547.8379  | 2 | 9.4 | 87  | 96  | No |  |
|     |                                                                                                                                               |  |                       | IEDVTPIPSDSTR                                                                                                                                                                                                                                                                               | R | R      | 95.00% | 42  |                              | 715.3674  | 2 | 6.6 | 129 | 141 | No |  |
| 203 | IPI00026271                                                                                                                                   |  | RPS14                 | 40S RIBOSOMAL PROTEIN S14.                                                                                                                                                                                                                                                                  |   |        |        |     |                              |           |   |     |     |     |    |  |
|     |                                                                                                                                               |  | H2AFJ;                |                                                                                                                                                                                                                                                                                             |   |        |        |     |                              |           |   |     |     |     |    |  |
|     |                                                                                                                                               |  | HIST1H2AB;            |                                                                                                                                                                                                                                                                                             |   |        |        |     |                              |           |   |     |     |     |    |  |
|     |                                                                                                                                               |  | HIST1H2AC;            |                                                                                                                                                                                                                                                                                             |   |        |        |     |                              |           |   |     |     |     |    |  |
|     |                                                                                                                                               |  | HIST1H2AD;            |                                                                                                                                                                                                                                                                                             |   |        |        |     |                              |           |   |     |     |     |    |  |
|     |                                                                                                                                               |  | HIST1H2AE;            |                                                                                                                                                                                                                                                                                             |   |        |        |     |                              |           |   |     |     |     |    |  |
|     |                                                                                                                                               |  | HIST1H2AG;            |                                                                                                                                                                                                                                                                                             |   |        |        |     |                              |           |   |     |     |     |    |  |
|     |                                                                                                                                               |  | HIST1H2AH;            |                                                                                                                                                                                                                                                                                             |   |        |        |     |                              |           |   |     |     |     |    |  |
|     |                                                                                                                                               |  | HIST1H2AI;            |                                                                                                                                                                                                                                                                                             |   |        |        |     |                              |           |   |     |     |     |    |  |
|     |                                                                                                                                               |  | HIST1H2AJ;            |                                                                                                                                                                                                                                                                                             |   |        |        |     |                              |           |   |     |     |     |    |  |
|     |                                                                                                                                               |  | HIST1H2AK;            |                                                                                                                                                                                                                                                                                             |   |        |        |     |                              |           |   |     |     |     |    |  |
|     |                                                                                                                                               |  | HIST1H2AL;            |                                                                                                                                                                                                                                                                                             |   |        |        |     |                              |           |   |     |     |     |    |  |
|     |                                                                                                                                               |  | HIST1H2AM;            |                                                                                                                                                                                                                                                                                             |   |        |        |     |                              |           |   |     |     |     |    |  |
|     |                                                                                                                                               |  | HIST2H2AA3;           |                                                                                                                                                                                                                                                                                             |   |        |        |     |                              |           |   |     |     |     |    |  |
|     |                                                                                                                                               |  | HIST2H2AA4;           |                                                                                                                                                                                                                                                                                             |   |        |        |     |                              |           |   |     |     |     |    |  |
|     |                                                                                                                                               |  | HIST2H2AC;            |                                                                                                                                                                                                                                                                                             |   |        |        |     |                              |           |   |     |     |     |    |  |
|     |                                                                                                                                               |  | HIST3H2A              |                                                                                                                                                                                                                                                                                             |   |        |        |     |                              |           |   |     |     |     |    |  |
| 204 | IPI00026272; IPI00031562; IPI00081836; IPI00102165; IPI00216456; IPI00216457; IPI00220855; IPI00255316; IPI00291764; IPI00339274; IPI00552873 |  |                       | HISTONE H2A TYPE 1-B.; HISTONE H2A TYPE 3.; HISTONE H2A TYPE 1-H.; H2A HISTONE FAMILY, MEMBER J ISOFORM 1.; HISTONE H2A TYPE 1-C.; HISTONE H2A TYPE 2-A.; H2A HISTONE FAMILY, MEMBER J ISOFORM 2.; HISTONE H2A TYPE 1-D.; HISTONE H2A TYPE 1.; HISTONE H2A TYPE 2-C.; HISTONE H2A TYPE 1-J. |   |        |        |     |                              |           |   |     |     |     |    |  |
|     |                                                                                                                                               |  | AGLQFPVGR             | R                                                                                                                                                                                                                                                                                           | V | 95.00% | 65     |     |                              | 472.7710  | 2 | 2.3 | 22  | 30  | No |  |
|     |                                                                                                                                               |  | HLQLAIR               | R                                                                                                                                                                                                                                                                                           | N | 95.00% | 31     |     |                              | 425.7682  | 2 | 2.7 | 83  | 89  | No |  |
|     |                                                                                                                                               |  | NDEELNLLGK            | R                                                                                                                                                                                                                                                                                           | V | 95.00% | 38     |     |                              | 636.8498  | 2 | 9.1 | 90  | 100 | No |  |
|     |                                                                                                                                               |  | VTIAQGGVLPNIQAVLLPK   | K                                                                                                                                                                                                                                                                                           | K | 95.00% | 75     |     |                              | 966.0951  | 2 | 6.6 | 101 | 119 | No |  |
|     |                                                                                                                                               |  | VTIAQGGVLPNIQAVLLPK   | K                                                                                                                                                                                                                                                                                           | K | 95.00% | 54     |     |                              | 644.3995  | 3 | 6.9 | 101 | 119 | No |  |
|     |                                                                                                                                               |  |                       |                                                                                                                                                                                                                                                                                             |   |        |        |     |                              |           |   |     |     |     |    |  |
| 205 | IPI00026314; IPI00646773                                                                                                                      |  | GSN                   | ISOFORM 1 OF GELSOLIN PRECURSOR.; ISOFORM 2 OF GELSOLIN PRECURSOR.                                                                                                                                                                                                                          |   |        |        |     |                              |           |   |     |     |     |    |  |
|     |                                                                                                                                               |  | AGALNSNDAFVLK         | K                                                                                                                                                                                                                                                                                           | T | 95.00% | 79     |     |                              | 660.3563  | 2 | 6.7 | 534 | 546 | No |  |
|     |                                                                                                                                               |  | AGKEPGLQIWR           | K                                                                                                                                                                                                                                                                                           | V | 95.00% | 36     |     |                              | 418.9048  | 3 | 2.0 | 62  | 72  | No |  |
|     |                                                                                                                                               |  | AQPVQVAEGSEPDGFWEALGG |                                                                                                                                                                                                                                                                                             |   |        |        |     |                              |           |   |     |     |     |    |  |
|     |                                                                                                                                               |  | K                     | R                                                                                                                                                                                                                                                                                           | A | 95.00% | 108    |     |                              | 1136.5570 | 2 | 7.7 | 627 | 648 | No |  |
|     |                                                                                                                                               |  | AQPVQVAEGSEPDGFWEALGG |                                                                                                                                                                                                                                                                                             |   |        |        |     |                              |           |   |     |     |     |    |  |
|     |                                                                                                                                               |  | K                     | R                                                                                                                                                                                                                                                                                           | A | 95.00% | 65     |     |                              | 758.0375  | 3 | 3.5 | 627 | 648 | No |  |

|     |             |         |                                                                               |                         |   |   |        |     |                                               |           |   |      |     |     |    |
|-----|-------------|---------|-------------------------------------------------------------------------------|-------------------------|---|---|--------|-----|-----------------------------------------------|-----------|---|------|-----|-----|----|
|     |             |         |                                                                               | DPDQTDGLGLSYLSSHIANVER  | R | V | 95.00% | 59  |                                               | 796.3912  | 3 | 4.1  | 398 | 419 | No |
|     |             |         |                                                                               | DSQEEEEKTEALTSK         | K | R | 95.00% | 77  |                                               | 833.4009  | 2 | 7.1  | 714 | 728 | No |
|     |             |         |                                                                               | DSQEEEEKTEALTSK         | K | R | 95.00% | 39  |                                               | 555.9323  | 3 | -0.4 | 714 | 728 | No |
|     |             |         |                                                                               | EVQGFESATFLGYFK         | R | S | 95.00% | 109 |                                               | 861.9281  | 2 | 6.0  | 148 | 162 | No |
|     |             |         |                                                                               | HVVVPEVVQR              | K | L | 95.00% | 37  |                                               | 638.3663  | 2 | 5.8  | 127 | 137 | No |
|     |             |         |                                                                               | HVVVPEVVQR              | K | L | 95.00% | 37  |                                               | 425.9117  | 3 | 1.6  | 178 | 188 | No |
|     |             |         |                                                                               | NWRDPDQTDGLGLSYLSSHIAN  |   |   |        |     |                                               |           |   |      |     |     |    |
|     |             |         |                                                                               | VER                     | K | V | 95.00% | 61  |                                               | 711.6028  | 4 | 5.8  | 395 | 419 | No |
|     |             |         |                                                                               | PALPAGTEDTAKEDAANRK     | K | L | 95.00% | 40  |                                               | 489.5034  | 4 | 3.2  | 227 | 245 | No |
|     |             |         |                                                                               | QTQVSVLPEGGETPLFK       | K | Q | 95.00% | 92  |                                               | 915.4939  | 2 | 8.1  | 374 | 390 | No |
|     |             |         |                                                                               | QTQVSVLPEGGETPLFK       | K | Q | 95.00% | 42  |                                               | 610.6624  | 3 | 3.5  | 374 | 390 | No |
|     |             |         |                                                                               | TGAQELLR                | K | V | 95.00% | 48  |                                               | 444.2542  | 2 | 6.0  | 565 | 572 | No |
|     |             |         |                                                                               | TPSAAYLWVGTGASEAEK      | K | T | 95.00% | 110 |                                               | 919.4580  | 2 | 5.9  | 598 | 615 | No |
|     |             |         |                                                                               | VHVSEEGTEPEAMLQVLGPK    | R | P | 95.00% | 35  | M13: Oxidation                                | 722.6987  | 3 | 2.4  | 258 | 277 | No |
|     |             |         |                                                                               | VHVSEEGTEPEAMLQVLGPKPA  |   |   |        |     |                                               |           |   |      |     |     |    |
|     |             |         |                                                                               | LPAGTEDTAK              | R | E | 95.00% | 30  | M13: Oxidation                                | 830.1764  | 4 | 7.4  | 207 | 238 | No |
|     |             |         |                                                                               | VPFDAATLHTSTAMAAQHGMDD  |   |   |        |     |                                               |           |   |      |     |     |    |
|     |             |         |                                                                               | DGTGQK                  | R | Q | 95.00% | 55  | M14: Oxidation, M20: Oxidation                | 969.1024  | 3 | 6.1  | 420 | 447 | No |
|     |             |         |                                                                               | VPVDPATYGQFYGGDSYIILYNY |   |   |        |     |                                               |           |   |      |     |     |    |
|     |             |         |                                                                               | R                       | K | H | 95.00% | 67  |                                               | 924.4556  | 3 | 5.7  | 458 | 481 | No |
|     |             |         |                                                                               | YIETDPANR               | R | D | 95.00% | 31  |                                               | 539.7648  | 2 | 4.3  | 679 | 687 | No |
| 206 | IPI00026538 | SH3BGR  | SH3 DOMAIN-BINDING GLUTAMIC ACID-RICH PROTEIN.                                | EGSEDAGNLPEAQEK         | K | N | 95.00% | 75  |                                               | 787.3604  | 2 | 9.2  | 183 | 197 | No |
|     |             |         |                                                                               | ELDIAGEDNRR             | K | W | 95.00% | 34  |                                               | 701.8375  | 2 | 7.7  | 99  | 110 | No |
|     |             |         |                                                                               | KQQEVVGFLEANKIDFK       | K | E | 95.00% | 30  |                                               | 665.0334  | 3 | 4.3  | 82  | 98  | No |
| 207 | IPI00026665 | QARS    | GLUTAMINYL-TRNA SYNTHETASE.                                                   | VFVATSSGSIAR            | K | K | 95.00% | 74  |                                               | 654.3755  | 2 | 8.3  | 68  | 80  | No |
|     |             |         |                                                                               | ATGILLYGLASR            | K | L | 95.00% | 72  |                                               | 617.8670  | 2 | 8.2  | 69  | 80  | No |
|     |             |         |                                                                               | EAAATQAAQQTGISTDK       | R | A | 95.00% | 98  |                                               | 831.4259  | 2 | 5.5  | 53  | 68  | No |
|     |             |         |                                                                               | HTGYVIELQHVVK           | R | G | 95.00% | 29  |                                               | 508.2865  | 3 | 3.6  | 658 | 670 | No |
|     |             |         |                                                                               | ILQLVATGAVR             | K | D | 95.00% | 36  |                                               | 570.8636  | 2 | 7.6  | 517 | 527 | No |
|     |             |         |                                                                               | KIHTEPQLSAALEYVR        | K | S | 95.00% | 40  |                                               | 619.0100  | 3 | 3.5  | 98  | 113 | No |
|     |             |         |                                                                               | LAWGQPVGLR              | R | H | 95.00% | 42  |                                               | 548.8203  | 2 | 5.2  | 648 | 657 | No |
|     |             |         |                                                                               | LFTLTALR                | R | R | 95.00% | 46  |                                               | 467.7921  | 2 | 4.0  | 534 | 541 | No |
|     |             |         |                                                                               | SHPLDPIDTVDFER          | R | E | 95.00% | 44  |                                               | 547.6056  | 3 | 5.6  | 114 | 127 | No |
|     |             |         |                                                                               | SLDIQVPNFPADETK         | K | G | 95.00% | 51  |                                               | 837.4274  | 2 | 4.8  | 605 | 619 | No |
| 208 | IPI00026904 | ADSL    | ISOFORM 1 OF ADENYLOSUCCINATE LYASE.                                          | AFIITGQTYTR             | R | K | 95.00% | 73  |                                               | 635.8461  | 2 | 3.7  | 235 | 245 | No |
|     |             |         |                                                                               | FLEEEVYPLPKPYESVMK      | R | V | 95.00% | 57  | M17: Oxidation                                | 744.0563  | 3 | 8.0  | 460 | 477 | No |
|     |             |         |                                                                               | HLMTLVMDPLQTSVQWFER     | R | T | 95.00% | 48  | M3: Oxidation, M7: Oxidation                  | 812.0755  | 3 | 8.5  | 310 | 329 | No |
|     |             |         |                                                                               | IQVDAYFSPHSQDLHLLDPSST  |   |   |        |     |                                               |           |   |      |     |     |    |
|     |             |         |                                                                               | GR                      | R | A | 95.00% | 56  |                                               | 981.8359  | 3 | 9.5  | 427 | 452 | No |
|     |             |         |                                                                               | IRQELPFMATENIIMAMVK     | R | A | 95.00% | 65  | M8: Oxidation, M15: Oxidation, M17: Oxidation | 761.7288  | 3 | 6.7  | 373 | 391 | No |
|     |             |         |                                                                               | KVDIEVLSVLASLGASVHK     | R | I | 95.00% | 75  |                                               | 655.7227  | 3 | 7.1  | 246 | 264 | No |
|     |             |         |                                                                               | KVDIEVLSVLASLGASVHK     | R | I | 95.00% | 50  |                                               | 492.0431  | 4 | 5.3  | 246 | 264 | No |
|     |             |         |                                                                               | LLANLKEMEEPFEK          | R | Q | 95.00% | 39  | M8: Oxidation                                 | 853.9447  | 2 | 8.2  | 271 | 284 | No |
|     |             |         |                                                                               | LLANLKEMEEPFEK          | R | Q | 95.00% | 33  | M8: Oxidation                                 | 569.6295  | 3 | 3.1  | 271 | 284 | No |
|     |             |         |                                                                               | NALDLLLLPK              | R | L | 95.00% | 66  |                                               | 498.8114  | 2 | 5.5  | 126 | 134 | No |
|     |             |         |                                                                               | SNLENIDFK               | K | M | 95.00% | 52  |                                               | 540.2734  | 2 | 1.5  | 67  | 75  | No |
|     |             |         |                                                                               | VLSQQAASVVK             | R | Q | 95.00% | 82  |                                               | 565.3350  | 2 | 3.5  | 405 | 415 | No |
| 209 | IPI00026964 | UQCRFS1 | UBIQUINOL-CYTOCHROME C REDUCTASE IRON-SULFUR SUBUNIT, MITOCHONDRIALPRECURSOR. | EIEQEAAVELSCLR          | K | D | 95.00% | 95  |                                               | 807.9277  | 2 | 8.5  | 183 | 196 | No |
|     |             |         |                                                                               | EIEQEAAVELSCLR          | K | D | 95.00% | 48  |                                               | 538.9542  | 3 | 8.0  | 183 | 196 | No |
|     |             |         |                                                                               | GKPLFVR                 | R | H | 95.00% | 25  |                                               | 408.7602  | 2 | 3.6  | 171 | 177 | No |
|     |             |         |                                                                               | NAVTFVSSMSASADV LALAK   | K | I | 95.00% | 77  | M10: Oxidation                                | 709.3713  | 3 | 8.5  | 131 | 151 | No |
|     |             |         |                                                                               | NAVTFVSSMSASADV LALAK   | K | I | 95.00% | 64  |                                               | 704.0403  | 3 | 9.5  | 131 | 151 | No |
|     |             |         |                                                                               | RLEVL DSTK              | R | S | 95.00% | 46  |                                               | 530.8086  | 2 | 8.5  | 93  | 101 | No |
|     |             |         |                                                                               | SGPFAPVLSATSR           | R | G | 95.00% | 75  |                                               | 645.3519  | 2 | 8.2  | 8   | 20  | No |
|     |             |         |                                                                               | VPDFSEYR                | K | R | 95.00% | 39  |                                               | 506.7457  | 2 | 9.6  | 85  | 92  | No |
| 210 | IPI00027107 | TUFM    | TU TRANSLATION ELONGATION FACTOR, MITOCHONDRIAL.                              | ADAVQDSEMVELVELEIR      | K | E | 95.00% | 77  | M9: Oxidation                                 | 1031.5130 | 2 | 7.7  | 186 | 203 | No |
|     |             |         |                                                                               | ADAVQDSEMVELVELEIR      | K | E | 95.00% | 48  | M9: Oxidation                                 | 688.0081  | 3 | 3.4  | 186 | 203 | No |
|     |             |         |                                                                               | AEAGDNLGALVR            | R | G | 95.00% | 114 |                                               | 593.3166  | 2 | 2.1  | 319 | 330 | No |
|     |             |         |                                                                               | DKPHVNVGTIGHVDHGK       | R | T | 95.00% | 65  |                                               | 905.4784  | 2 | 6.9  | 57  | 73  | No |
|     |             |         |                                                                               | DKPHVNVGTIGHVDHGK       | R | T | 95.00% | 43  |                                               | 603.9855  | 3 | 2.4  | 57  | 73  | No |
|     |             |         |                                                                               | DLEKPFLLPVEAVYSVPGR     | R | G | 95.00% | 50  |                                               | 1065.0950 | 2 | 7.8  | 256 | 274 | No |
|     |             |         |                                                                               | DLEKPFLLPVEAVYSVPGR     | R | G | 95.00% | 34  |                                               | 710.3994  | 3 | 8.4  | 256 | 274 | No |

|     |                          |             |                                                     |                    |   |   |        |     |                |           |   |     |     |     |     |
|-----|--------------------------|-------------|-----------------------------------------------------|--------------------|---|---|--------|-----|----------------|-----------|---|-----|-----|-----|-----|
|     |                          |             |                                                     | EHLLLAR            | R | Q | 95.00% | 31  |                | 426.2608  | 2 | 3.9 | 166 | 172 | No  |
|     |                          |             |                                                     | ELLTEFGYK          | R | G | 95.00% | 50  |                | 550.2902  | 2 | 4.4 | 204 | 212 | No  |
|     |                          |             |                                                     | GITINAAHVEYSTAAR   | R | H | 95.00% | 111 |                | 837.4401  | 2 | 6.7 | 108 | 123 | No  |
|     |                          |             |                                                     | GITINAAHVEYSTAAR   | R | H | 95.00% | 60  |                | 558.6275  | 3 | 3.4 | 108 | 123 | No  |
|     |                          |             |                                                     | GLVMVKPGSIKPHQK    | R | V | 95.00% | 50  | M4: Oxidation  | 817.9752  | 2 | 0.5 | 340 | 354 | No  |
|     |                          |             |                                                     | GLVMVKPGSIKPHQK    | R | V | 95.00% | 25  | M4: Oxidation  | 545.6544  | 3 | 3.4 | 340 | 354 | No  |
|     |                          |             |                                                     | GTVVTGLER          | R | G | 95.00% | 52  |                | 516.7916  | 2 | 6.1 | 275 | 284 | No  |
|     |                          |             |                                                     | IILPPEKELAMPGEDLK  | R | F | 95.00% | 41  | M11: Oxidation | 637.0228  | 3 | 8.8 | 392 | 408 | No  |
|     |                          |             |                                                     | KYEEIDNAPEER       | K | A | 95.00% | 76  |                | 746.8543  | 2 | 5.8 | 94  | 105 | No  |
|     |                          |             |                                                     | KYEEIDNAPEER       | K | A | 95.00% | 34  |                | 498.2376  | 3 | 3.4 | 94  | 105 | No  |
|     |                          |             |                                                     | LLDAVDYIPVPAR      | K | D | 95.00% | 88  |                | 771.9351  | 2 | 5.9 | 242 | 255 | No  |
|     |                          |             |                                                     | QIGVEHVVVYNK       | R | A | 95.00% | 84  |                | 742.4208  | 2 | 4.4 | 173 | 185 | No  |
|     |                          |             |                                                     | QIGVEHVVVYNK       | R | A | 95.00% | 29  |                | 495.2830  | 3 | 4.2 | 173 | 185 | No  |
|     |                          |             |                                                     | TIGTGLVTNTLAMTEEEK | R | N | 95.00% | 97  | M13: Oxidation | 962.4916  | 2 | 8.6 | 433 | 450 | No  |
|     |                          |             |                                                     | TTLTAAITK          | K | I | 95.00% | 23  |                | 460.2793  | 2 | 4.5 | 74  | 82  | No  |
|     |                          |             |                                                     | TVVTGIEMFHK        | R | S | 95.00% | 57  | M8: Oxidation  | 639.3346  | 2 | 3.8 | 304 | 314 | No  |
|     |                          |             |                                                     | YEEIDNAPEER        | K | A | 95.00% | 34  |                | 682.8063  | 2 | 5.5 | 95  | 105 | No  |
| 211 | IPI00027146              | GLUD2       | GLUTAMATE DEHYDROGENASE 2, MITOCHONDRIAL PRECURSOR. | MVEGFFDR           | K | G | 95.00% | 35  | M1: Oxidation  | 508.7330  | 2 | 6.9 | 69  | 76  | Yes |
|     |                          |             |                                                     | YSTDVSVDEVK        | R | A | 95.00% | 39  |                | 621.3024  | 2 | 5.4 | 152 | 162 | Yes |
| 212 | IPI00027230              | HSP90B1     | ENDOPLASMIN PRECURSOR.                              | EEASDYLELDTIK      | K | N | 95.00% | 76  |                | 763.3747  | 2 | 9.2 | 253 | 265 | No  |
|     |                          |             |                                                     | ELISNASDALDK       | R | I | 95.00% | 57  |                | 638.3295  | 2 | 6.1 | 103 | 114 | Yes |
|     |                          |             |                                                     | ELISNASDALDKIR     | R | L | 95.00% | 83  |                | 772.9214  | 2 | 4.1 | 103 | 116 | No  |
|     |                          |             |                                                     | FAFQAEVNR          | K | M | 95.00% | 42  |                | 541.2779  | 2 | 4.5 | 76  | 84  | No  |
|     |                          |             |                                                     | FOSSHPTDITSLDQYVER | R | M | 95.00% | 58  |                | 754.0334  | 3 | 9.5 | 512 | 530 | No  |
|     |                          |             |                                                     | GVVDSDDLPLNVS      | K | E | 95.00% | 91  |                | 743.3837  | 2 | 3.1 | 435 | 448 | No  |
|     |                          |             |                                                     | LIINSLYK           | K | N | 95.00% | 24  |                | 482.3006  | 2 | 5.6 | 88  | 95  | No  |
|     |                          |             |                                                     | NLLHVDTGTGVMTR     | K | E | 95.00% | 54  | M12: Oxidation | 765.3953  | 2 | 5.3 | 143 | 156 | No  |
|     |                          |             |                                                     | SILFVPTSAPR        | K | G | 95.00% | 57  |                | 594.3465  | 2 | 5.2 | 385 | 395 | No  |
| 213 | IPI00027252              | PHB2        | PROHIBITIN-2.                                       | AQVSLLR            | R | R | 95.00% | 45  |                | 450.2911  | 2 | 7.2 | 158 | 165 | No  |
|     |                          |             |                                                     | DLQMVNLSR          | K | V | 95.00% | 34  | M4: Oxidation  | 602.8278  | 2 | 9.7 | 98  | 107 | No  |
|     |                          |             |                                                     | ESVFTVEGGHR        | R | A | 95.00% | 53  |                | 609.3030  | 2 | 5.4 | 38  | 48  | No  |
|     |                          |             |                                                     | FNASQLTQR          | K | A | 95.00% | 65  |                | 589.3260  | 2 | 9.4 | 148 | 157 | No  |
|     |                          |             |                                                     | IGGVQQDTILAEGLHFR  | R | I | 95.00% | 83  |                | 618.6728  | 3 | 8.2 | 55  | 71  | No  |
|     |                          |             |                                                     | IVQAEGEAAK         | K | M | 95.00% | 97  |                | 608.3185  | 2 | 5.7 | 225 | 236 | No  |
|     |                          |             |                                                     | LGLDYEER           | R | V | 95.00% | 41  |                | 497.7501  | 2 | 7.8 | 124 | 131 | No  |
|     |                          |             |                                                     | LLLGAGAVAYGVR      | K | E | 95.00% | 60  |                | 630.3833  | 2 | 8.8 | 25  | 37  | No  |
|     |                          |             |                                                     | MLGEALSKNPGYIK     | K | L | 95.00% | 56  | M1: Oxidation  | 768.9159  | 2 | 9.2 | 237 | 250 | No  |
|     |                          |             |                                                     | QKIVQAEGEAAK       | R | M | 95.00% | 59  |                | 736.3964  | 2 | 6.2 | 223 | 236 | No  |
|     |                          |             |                                                     | VLPSIVNEVLK        | R | S | 95.00% | 32  |                | 605.8784  | 2 | 6.5 | 132 | 142 | No  |
|     |                          |             |                                                     | VLSRPNQAQLPSMYQR   | R | L | 95.00% | 35  | M13: Oxidation | 952.9957  | 2 | 9.5 | 108 | 123 | No  |
|     |                          |             |                                                     | VLSRPNQAQLPSMYQR   | R | L | 95.00% | 30  | M13: Oxidation | 635.6640  | 3 | 5.7 | 108 | 123 | No  |
| 214 | IPI00027255              | MYL6; MYL6B | MYOSIN LIGHT POLYPEPTIDE 6B.                        | AEPAVPAQPOK        | K | T | 95.00% | 41  |                | 568.3130  | 2 | 6.0 | 36  | 46  | No  |
|     |                          |             |                                                     | ALGQNPTNAEVLK      | R | V | 95.00% | 56  |                | 677.8733  | 2 | 4.1 | 95  | 107 | No  |
|     |                          |             |                                                     | EAFELFDR           | K | V | 95.00% | 54  |                | 513.7520  | 2 | 6.3 | 71  | 78  | No  |
|     |                          |             |                                                     | GQGTYEDYLEGFR      | R | V | 95.00% | 77  |                | 767.8478  | 2 | 4.1 | 139 | 151 | No  |
|     |                          |             |                                                     | HVLTTLGK           | R | M | 95.00% | 51  |                | 499.2902  | 2 | 4.4 | 168 | 176 | No  |
|     |                          |             |                                                     | KPAGPSISKPAK       | K | P | 95.00% | 32  |                | 417.9218  | 3 | 5.8 | 11  | 23  | No  |
|     |                          |             |                                                     | RVDFETFLPMLQAVAK   | R | N | 95.00% | 47  | M10: Oxidation | 627.6759  | 3 | 9.3 | 121 | 136 | No  |
|     |                          |             |                                                     | RVDFETFLPMLQAVAK   | R | N | 95.00% | 56  |                | 933.0126  | 2 | 9.4 | 121 | 136 | No  |
|     |                          |             |                                                     | RVDFETFLPMLQAVAK   | R | N | 95.00% | 32  |                | 622.3420  | 3 | 5.8 | 121 | 136 | No  |
|     |                          |             |                                                     | TKAEPVPAQPOK       | K | T | 95.00% | 34  |                | 682.8859  | 2 | 7.3 | 34  | 46  | No  |
|     |                          |             |                                                     | TOEPPVDLSK         | K | V | 95.00% | 32  |                | 1113.5890 | 1 | 8.8 | 47  | 56  | No  |
|     |                          |             |                                                     | TOEPPVDLSK         | K | V | 95.00% | 51  |                | 557.2965  | 2 | 5.2 | 47  | 56  | No  |
| 215 | IPI00027350; IPI00375400 | PRDX2       | PEROXIREDOXIN-2.; 16 KDA PROTEIN.                   | ATAVVDGAFK         | K | E | 95.00% | 53  |                | 978.5338  | 1 | 7.9 | 17  | 26  | No  |
|     |                          |             |                                                     | ATAVVDGAFK         | K | E | 95.00% | 70  |                | 489.7701  | 2 | 6.5 | 17  | 26  | No  |
|     |                          |             |                                                     | ATAVVDGAFKEVK      | K | L | 95.00% | 28  |                | 667.8749  | 2 | 7.5 | 17  | 29  | No  |
|     |                          |             |                                                     | ATAVVDGAFKEVK      | K | L | 95.00% | 31  |                | 445.5846  | 3 | 4.7 | 17  | 29  | No  |
|     |                          |             |                                                     | EGGLGPLNIPLADVTR   | K | R | 95.00% | 96  |                | 867.9982  | 2 | 7.4 | 93  | 109 | No  |
|     |                          |             |                                                     | EGGLGPLNIPLADVTR   | K | R | 95.00% | 71  |                | 579.0018  | 3 | 8.0 | 93  | 109 | No  |
|     |                          |             |                                                     | GLFIIDGK           | R | G | 95.00% | 35  |                | 862.5106  | 1 | 7.5 | 128 | 135 | No  |
|     |                          |             |                                                     | GLFIIDGK           | R | G | 95.00% | 33  |                | 431.7568  | 2 | 1.9 | 128 | 135 | No  |
|     |                          |             |                                                     | IGKPAIDFK          | R | A | 95.00% | 35  |                | 972.5594  | 1 | 7.5 | 8   | 16  | No  |
|     |                          |             |                                                     | IGKPAIDFK          | R | A | 95.00% | 39  |                | 486.7812  | 2 | 2.6 | 8   | 16  | No  |
|     |                          |             |                                                     | KEGGLGPLNIPLADVTR  | R | R | 95.00% | 97  |                | 932.0461  | 2 | 7.3 | 92  | 109 | No  |
|     |                          |             |                                                     | KEGGLGPLNIPLADVTR  | R | R | 95.00% | 49  |                | 621.7010  | 3 | 8.8 | 42  | 59  | No  |
|     |                          |             |                                                     | KEGGLGPLNIPLADVTR  | R | L | 95.00% | 37  |                | 673.7346  | 3 | 8.1 | 92  | 110 | No  |
|     |                          |             |                                                     | LSEIDYGLK          | R | T | 95.00% | 49  |                | 512.2748  | 2 | 5.2 | 61  | 69  | No  |
|     |                          |             |                                                     | PGSDTIKPNVDDSK     | K | E | 95.00% | 33  |                | 491.5830  | 3 | 6.6 | 128 | 141 | No  |
|     |                          |             |                                                     | QITVNDLIPVGR       | R | S | 95.00% | 73  |                | 606.3436  | 2 | 3.6 | 140 | 150 | Yes |

|                         |             |       |                                        |                      |                              |           |        |     |     |           |    |     |     |     |     |
|-------------------------|-------------|-------|----------------------------------------|----------------------|------------------------------|-----------|--------|-----|-----|-----------|----|-----|-----|-----|-----|
| 216                     | IPI00027448 | ATP5L | ATP SYNTHASE SUBUNIT G, MITOCHONDRIAL. | QITVNDLPVGR          | R                            | S         | 95.00% | 28  |     | 404.5660  | 3  | 6.1 | 90  | 100 | Yes |
|                         |             |       |                                        | RLSEYGVLK            | R                            | T         | 95.00% | 36  |     | 590.3271  | 2  | 7.6 | 110 | 119 | No  |
|                         |             |       |                                        | TDEGIAYR             | K                            | G         | 95.00% | 44  |     | 462.7273  | 2  | 4.3 | 120 | 127 | No  |
|                         |             |       |                                        | GIIGYDV              | R                            | -         | 95.00% | 27  |     | 736.3925  | 1  | 5.8 | 97  | 103 | No  |
|                         |             |       |                                        | IVNSAQTGSFK          | K                            | Q         | 95.00% | 40  |     | 1151.6170 | 1  | 9.5 | 56  | 66  | No  |
|                         |             |       |                                        | IVNSAQTGSFK          | K                            | Q         | 95.00% | 85  |     | 576.3100  | 2  | 5.2 | 56  | 66  | No  |
|                         |             |       |                                        | KIVNSAQTGSFK         | K                            | Q         | 95.00% | 69  |     | 640.3586  | 2  | 6.5 | 55  | 66  | No  |
|                         |             |       |                                        | LATFWYYAK            | R                            | V         | 95.00% | 56  |     | 581.8049  | 2  | 7.0 | 27  | 35  | No  |
|                         |             |       |                                        | TPALVNAAVTYSK        | K                            | P         | 95.00% | 76  |     | 667.8753  | 2  | 8.0 | 12  | 24  | No  |
|                         |             |       |                                        | TPALVNAAVTYSKPR      | K                            | L         | 95.00% | 102 |     | 794.4506  | 2  | 4.6 | 12  | 26  | No  |
|                         |             |       |                                        | TPALVNAAVTYSKPR      | K                            | L         | 95.00% | 75  |     | 529.9712  | 3  | 7.6 | 12  | 26  | No  |
|                         |             |       |                                        | VELVPPTPAEIPR        | K                            | A         | 95.00% | 86  |     | 709.4097  | 2  | 4.1 | 36  | 48  | No  |
|                         |             |       |                                        | AVEKLSVEALNSLTGEFK   | R                            | G         | 95.00% | 46  |     | 645.6905  | 3  | 6.1 | 153 | 170 | No  |
|                         |             |       |                                        | AVEKLSVEALNSLTGEFKGK | R                            | Y         | 95.00% | 63  |     | 530.7983  | 4  | 4.5 | 153 | 172 | No  |
|                         |             |       |                                        | DWPDAR               | R                            | G         | 95.00% | 44  |     | 759.3495  | 1  | 8.9 | 210 | 215 | Yes |
| ELFDPIISDR              | K           | H     | 95.00%                                 | 57                   |                              | 1204.6290 | 1      | 5.9 | 87  | 96        | No |     |     |     |     |
| ELFDPIISDR              | K           | H     | 95.00%                                 | 65                   |                              | 602.8179  | 2      | 5.3 | 87  | 96        | No |     |     |     |     |
| EQQQIIDDHFLFDK          | K           | P     | 95.00%                                 | 92                   |                              | 888.4376  | 2      | 3.8 | 183 | 196       | No |     |     |     |     |
| EQQQIIDDHFLFDK          | K           | P     | 95.00%                                 | 34                   |                              | 592.6297  | 3      | 7.1 | 183 | 196       | No |     |     |     |     |
| EQQQIIDDHFLFDKPVSPLLLAS |             |       |                                        |                      |                              |           |        |     |     |           |    |     |     |     |     |
| GMAR                    | K           | D     | 95.00%                                 | 88                   | M2: Oxidation                | 1028.8750 | 3      | 8.5 | 183 | 209       | No |     |     |     |     |
| EQQQIIDDHFLFDKPVSPLLLAS |             |       |                                        |                      |                              |           |        |     |     |           |    |     |     |     |     |
| GMAR                    | K           | D     | 95.00%                                 | 55                   | M2: Oxidation                | 771.9068  | 4      | 6.8 | 183 | 209       | No |     |     |     |     |
| EQQQIIDDHFLFDKPVSPLLLAS |             |       |                                        |                      |                              |           |        |     |     |           |    |     |     |     |     |
| GMAR                    | K           | D     | 95.00%                                 | 90                   |                              | 1023.5450 | 3      | 9.8 | 183 | 209       | No |     |     |     |     |
| EQQQIIDDHFLFDKPVSPLLLAS |             |       |                                        |                      |                              |           |        |     |     |           |    |     |     |     |     |
| GMAR                    | K           | D     | 95.00%                                 | 29                   |                              | 767.9084  | 4      | 7.3 | 183 | 209       | No |     |     |     |     |
| FEEILTR                 | K           | L     | 95.00%                                 | 44                   |                              | 907.4909  | 1      | 2.2 | 308 | 314       | No |     |     |     |     |
| FEEILTR                 | K           | L     | 95.00%                                 | 46                   |                              | 454.2489  | 2      | 1.2 | 308 | 314       | No |     |     |     |     |
| FKLNYKPEEEYPDLSK        | K           | H     | 95.00%                                 | 94                   |                              | 1000.5140 | 2      | 8.9 | 10  | 25        | No |     |     |     |     |
| FKLNYKPEEEYPDLSK        | K           | H     | 95.00%                                 | 52                   |                              | 667.3423  | 3      | 4.8 | 10  | 25        | No |     |     |     |     |
| GGDDLDPNYVLSR           | K           | V     | 95.00%                                 | 118                  |                              | 754.3567  | 2      | 1.6 | 117 | 130       | No |     |     |     |     |
| GQSIDDMIPAQK            | K           | -     | 95.00%                                 | 43                   | M7: Oxidation                | 1318.6410 | 1      | 7.5 | 370 | 381       | No |     |     |     |     |
| GQSIDDMIPAQK            | K           | -     | 95.00%                                 | 95                   | M7: Oxidation                | 659.8216  | 2      | 3.0 | 370 | 381       | No |     |     |     |     |
| GQSIDDMIPAQK            | K           | -     | 95.00%                                 | 87                   |                              | 651.8228  | 2      | 0.9 | 370 | 381       | No |     |     |     |     |
| GTGGVDTAAVGSVFDVSNADR   | R           | L     | 95.00%                                 | 76                   | S12: Phospho                 | 1037.9630 | 2      | 4.8 | 321 | 341       | No |     |     |     |     |
| GTGGVDTAAVGSVFDVSNADR   | R           | L     | 95.00%                                 | 74                   | T2: Phospho                  | 1037.9630 | 2      | 4.8 | 321 | 341       | No |     |     |     |     |
| GTGGVDTAAVGSVFDVSNADR   | R           | L     | 95.00%                                 | 76                   | T7: Phospho                  | 1037.9660 | 2      | 7.4 | 321 | 341       | No |     |     |     |     |
| GTGGVDTAAVGSVFDVSNADR   | R           | L     | 95.00%                                 | 170                  |                              | 997.9805  | 2      | 5.7 | 321 | 341       | No |     |     |     |     |
| GTGGVDTAAVGSVFDVSNADR   | R           | L     | 95.00%                                 | 95                   |                              | 665.6560  | 3      | 5.3 | 321 | 341       | No |     |     |     |     |
| GTGGVDTAAVGSVFDVSNADR   | R           | L     | 95.00%                                 | 148                  |                              | 1254.6440 | 3      | 8.9 | 321 | 358       | No |     |     |     |     |
| GSSEVEQQLVVDGVK         | R           | L     | 95.00%                                 | 54                   |                              | 501.7590  | 2      | 9.1 | 97  | 105       | No |     |     |     |     |
| HGGYKPTDK               | K           | G     | 95.00%                                 | 40                   |                              | 674.8575  | 2      | 7.2 | 106 | 116       | No |     |     |     |     |
| HKTDLNHNENLK            | K           | G     | 95.00%                                 | 46                   |                              | 450.2399  | 3      | 4.9 | 106 | 116       | No |     |     |     |     |
| HKTDLNHNENLKGGDDLDPNYVL |             |       |                                        |                      |                              |           |        |     |     |           |    |     |     |     |     |
| SSR                     | K           | V     | 95.00%                                 | 92                   |                              | 946.4742  | 3      | 8.9 | 106 | 130       | No |     |     |     |     |
| HKTDLNHNENLKGGDDLDPNYVL |             |       |                                        |                      |                              |           |        |     |     |           |    |     |     |     |     |
| SSR                     | K           | V     | 95.00%                                 | 44                   |                              | 710.1038  | 4      | 3.5 | 106 | 130       | No |     |     |     |     |
| HPKFEEILTR              | K           | L     | 95.00%                                 | 43                   |                              | 635.3544  | 2      | 4.1 | 305 | 314       | No |     |     |     |     |
| HPKFEEILTR              | K           | L     | 95.00%                                 | 68                   |                              | 423.9051  | 3      | 3.2 | 305 | 314       | No |     |     |     |     |
| IEEIFK                  | K           | K     | 95.00%                                 | 44                   |                              | 778.4367  | 1      | 1.9 | 260 | 265       | No |     |     |     |     |
| IEEIFKK                 | K           | A     | 95.00%                                 | 36                   |                              | 906.5304  | 1      | 0.2 | 260 | 266       | No |     |     |     |     |
| IEEIFKK                 | K           | A     | 95.00%                                 | 49                   |                              | 453.7707  | 2      | 3.8 | 260 | 266       | No |     |     |     |     |
| LAHLSK                  | K           | H     | 95.00%                                 | 24                   |                              | 668.4150  | 1      | 8.1 | 299 | 304       | No |     |     |     |     |
| LEKGSIDDMIPAQK          | K           | -     | 95.00%                                 | 58                   | M10: Oxidation               | 844.9381  | 2      | 9.0 | 367 | 381       | No |     |     |     |     |
| LGSSEVEQQLVVDGVK        | R           | L     | 95.00%                                 | 134                  |                              | 893.4904  | 2      | 7.3 | 342 | 358       | No |     |     |     |     |
| LGSSEVEQQLVVDGVK        | R           | L     | 95.00%                                 | 105                  |                              | 595.9958  | 3      | 6.8 | 342 | 358       | No |     |     |     |     |
| LMVEMEK                 | K           | K     | 95.00%                                 | 34                   | M2: Oxidation                | 895.4282  | 1      | 1.3 | 359 | 365       | No |     |     |     |     |
| LMVEMEK                 | K           | K     | 95.00%                                 | 41                   | M2: Oxidation                | 448.2198  | 2      | 5.3 | 359 | 365       | No |     |     |     |     |
| LMVEMEK                 | K           | K     | 95.00%                                 | 40                   | M2: Oxidation                | 456.2175  | 2      | 5.8 | 359 | 365       | No |     |     |     |     |
| LMVEMEK                 | K           | K     | 95.00%                                 | 40                   | M2: Oxidation, M5: Oxidation | 456.2175  | 2      | 5.8 | 359 | 365       | No |     |     |     |     |
| LMVEMEK                 | K           | K     | 95.00%                                 | 30                   | M5: Oxidation                | 895.4301  | 1      | 3.5 | 359 | 365       | No |     |     |     |     |
| LMVEMEK                 | K           | K     | 95.00%                                 | 43                   | M5: Oxidation                | 448.2186  | 2      | 2.7 | 359 | 365       | No |     |     |     |     |

|                         |   |   |        |     |                                  |           |   |      |     |     |     |
|-------------------------|---|---|--------|-----|----------------------------------|-----------|---|------|-----|-----|-----|
| LMVEMEK                 | K | K | 95.00% | 41  |                                  | 879.4347  | 1 | 3.0  | 359 | 365 | No  |
| LMVEMEK                 | K | K | 95.00% | 42  |                                  | 440.2214  | 2 | 3.3  | 359 | 365 | No  |
| LNYPKEEYDPDSK           | K | H | 95.00% | 89  |                                  | 862.9278  | 2 | 5.4  | 12  | 25  | No  |
| LNYPKEEYDPDSK           | K | H | 95.00% | 60  |                                  | 575.6235  | 3 | 9.6  | 12  | 25  | No  |
| LSVEALNSLTGEFK          | K | G | 95.00% | 41  | S8: Phospho                      | 794.3953  | 2 | 9.9  | 157 | 170 | No  |
| LSVEALNSLTGEFK          | K | G | 95.00% | 130 |                                  | 754.4084  | 2 | 5.5  | 157 | 170 | No  |
| LSVEALNSLTGEFK          | K | G | 95.00% | 47  |                                  | 503.2740  | 3 | 3.8  | 157 | 170 | No  |
| LSVEALNSLTGEFKGK        | K | Y | 95.00% | 91  |                                  | 846.9675  | 2 | 5.9  | 157 | 172 | No  |
| LSVEALNSLTGEFKGK        | K | Y | 95.00% | 46  |                                  | 564.9821  | 3 | 7.9  | 157 | 172 | No  |
| LSVEALNSLTGEFKGKYPLK    | K | S | 95.00% | 57  |                                  | 786.4371  | 3 | 8.6  | 157 | 177 | No  |
| PFGNTHNK                | M | F | 95.00% | 46  |                                  | 457.7312  | 2 | 6.8  | 2   | 9   | No  |
| PVSPLLASGMAR            | K | D | 95.00% | 77  | M11: Oxidation                   | 664.3789  | 2 | 6.9  | 197 | 209 | Yes |
| PVSPLLASGMAR            | K | D | 95.00% | 88  |                                  | 656.3820  | 2 | 7.7  | 197 | 209 | Yes |
| RAVEKLSVEALNSLTGEFK     | R | G | 95.00% | 59  |                                  | 697.7241  | 3 | 5.5  | 152 | 170 | No  |
| RGTGGVDTAAGSVFVDSNAD    |   |   |        |     |                                  |           |   |      |     |     |     |
| R                       | K | L | 95.00% | 130 |                                  | 1076.0330 | 2 | 6.8  | 320 | 341 | No  |
| RGTGGVDTAAGSVFVDSNAD    |   |   |        |     |                                  |           |   |      |     |     |     |
| R                       | K | L | 95.00% | 96  |                                  | 717.6882  | 3 | 2.7  | 320 | 341 | No  |
| SFLVWVNEEDHLR           | K | V | 95.00% | 100 |                                  | 822.4178  | 2 | 5.7  | 224 | 236 | No  |
| SFLVWVNEEDHLR           | K | V | 95.00% | 62  |                                  | 548.6142  | 3 | 5.3  | 224 | 236 | No  |
| SMTKEQQQLIDDHFLDKPVS    | K | P | 95.00% | 50  | M2: Oxidation                    | 790.0471  | 3 | 5.1  | 178 | 196 | No  |
| PLLLASGMAR              | K | D | 95.00% | 36  | M2: Oxidation                    | 915.9737  | 4 | 8.4  | 178 | 209 | No  |
| PLLLASGMAR              | K | D | 95.00% | 58  | M2: Oxidation                    | 1226.2950 | 3 | 9.4  | 178 | 209 | No  |
| PLLLASGMAR              | K | D | 95.00% | 47  | M2: Oxidation                    | 919.9714  | 4 | 7.2  | 178 | 209 | No  |
| PLLLASGMAR              | K | D | 95.00% | 43  | M2: Oxidation                    | 736.1796  | 5 | 8.6  | 178 | 209 | No  |
| PLLLASGMAR              | K | D | 95.00% | 58  | M2: Oxidation,<br>M3: Oxidation  | 1226.2950 | 3 | 9.4  | 178 | 209 | No  |
| PLLLASGMAR              | K | D | 95.00% | 47  | M2: Oxidation,<br>M3: Oxidation  | 919.9714  | 4 | 7.2  | 178 | 209 | No  |
| PLLLASGMAR              | K | D | 95.00% | 43  | M2: Oxidation,<br>M3: Oxidation  | 736.1796  | 5 | 8.6  | 178 | 209 | No  |
| PLLLASGMAR              | K | D | 95.00% | 37  | M3: Oxidation                    | 915.9711  | 4 | 5.6  | 178 | 209 | No  |
| PLLLASGMAR              | K | D | 95.00% | 39  |                                  | 911.9637  | 4 | -4.0 | 178 | 209 | No  |
| TDLNHENLK               | K | G | 95.00% | 67  |                                  | 542.2785  | 2 | 5.1  | 108 | 116 | No  |
| TDLNHENLKGDDLDPNYLSS    |   |   |        |     |                                  |           |   |      |     |     |     |
| R                       | K | V | 95.00% | 72  |                                  | 1286.6250 | 2 | 5.3  | 108 | 130 | No  |
| TDLNHENLKGDDLDPNYLSS    |   |   |        |     |                                  |           |   |      |     |     |     |
| R                       | K | V | 95.00% | 67  |                                  | 858.0884  | 3 | 8.4  | 108 | 130 | No  |
| VLTELEYK                | K | K | 95.00% | 36  |                                  | 978.5928  | 1 | 5.2  | 33  | 40  | No  |
| VLTELEYK                | K | K | 95.00% | 71  |                                  | 489.7987  | 2 | 2.0  | 33  | 40  | No  |
| VLTELEYK                | K | L | 95.00% | 24  |                                  | 1106.6840 | 1 | 0.8  | 33  | 41  | No  |
| VLTELEYK                | K | L | 95.00% | 57  |                                  | 553.8461  | 2 | 1.4  | 33  | 41  | No  |
| AVLHVALR                | R | N | 95.00% | 32  |                                  | 878.5596  | 1 | 2.3  | 97  | 104 | No  |
| AVLHVALR                | R | N | 95.00% | 59  |                                  | 439.7833  | 2 | 1.3  | 97  | 104 | No  |
| DVMPEVVK                | K | V | 95.00% | 28  | M3: Oxidation                    | 474.2321  | 2 | 5.8  | 117 | 124 | No  |
| EWFLQAAK                | K | D | 95.00% | 49  |                                  | 992.5262  | 1 | 5.7  | 227 | 234 | No  |
| EWFLQAAK                | K | D | 95.00% | 68  |                                  | 496.7655  | 2 | 2.6  | 227 | 234 | No  |
| FAAYFQQGDMESNGK         | R | Y | 95.00% | 94  | M10: Oxidation                   | 854.8713  | 2 | 4.1  | 348 | 362 | No  |
| HFVALSTNTTK             | K | V | 95.00% | 71  |                                  | 1218.6540 | 1 | 4.7  | 242 | 252 | No  |
| HFVALSTNTTK             | K | V | 95.00% | 72  |                                  | 609.8294  | 2 | 2.2  | 242 | 252 | No  |
| ILLANFLAQTEALMR         | K | G | 95.00% | 108 | M14: Oxidation                   | 860.4825  | 2 | 6.0  | 424 | 438 | No  |
| ILLANFLAQTEALMR         | K | G | 95.00% | 84  | M14: Oxidation                   | 573.9922  | 3 | 8.2  | 424 | 438 | No  |
| ILLANFLAQTEALMR         | K | G | 95.00% | 104 |                                  | 852.4860  | 2 | 7.1  | 424 | 438 | No  |
| ILLANFLAQTEALMR         | K | G | 95.00% | 74  |                                  | 568.6587  | 3 | 4.9  | 424 | 438 | No  |
| INYTEGR                 | K | A | 95.00% | 40  |                                  | 426.7170  | 2 | 5.5  | 90  | 96  | No  |
| KIEPELDGSAQVTSHDASTNGLI |   |   |        |     |                                  |           |   |      |     |     |     |
| NFIK                    | K | Q | 95.00% | 67  |                                  | 962.1692  | 3 | 8.0  | 524 | 550 | No  |
| KIEPELDGSAQVTSHDASTNGLI |   |   |        |     |                                  |           |   |      |     |     |     |
| NFIK                    | K | Q | 95.00% | 48  |                                  | 721.8798  | 4 | 9.2  | 524 | 550 | No  |
| LQQWYR                  | K | E | 95.00% | 33  |                                  | 447.2375  | 2 | 4.2  | 13  | 18  | No  |
| LTPFMLGALVAMYEHK        | K | I | 95.00% | 51  | M5: Oxidation,<br>M12: Oxidation | 926.9774  | 2 | 6.9  | 482 | 497 | No  |
| LTPFMLGALVAMYEHK        | K | I | 95.00% | 41  | M5: Oxidation,<br>M12: Oxidation | 618.3197  | 3 | 5.0  | 482 | 497 | No  |

|     |                                                       |        |                                                                      |                                                                                                                                                                                                                                                                                                              |   |   |        |     |                |           |   |      |     |     |     |  |
|-----|-------------------------------------------------------|--------|----------------------------------------------------------------------|--------------------------------------------------------------------------------------------------------------------------------------------------------------------------------------------------------------------------------------------------------------------------------------------------------------|---|---|--------|-----|----------------|-----------|---|------|-----|-----|-----|--|
|     |                                                       |        |                                                                      | LTPFMLGALVAMYEHK                                                                                                                                                                                                                                                                                             | K | I | 95.00% | 86  |                | 910.9822  | 2 | 6.7  | 482 | 497 | No  |  |
|     |                                                       |        |                                                                      | MLVDLAK                                                                                                                                                                                                                                                                                                      | R | S | 95.00% | 31  | M1: Oxidation  | 805.4500  | 1 | 0.7  | 67  | 73  | No  |  |
|     |                                                       |        |                                                                      | MLVDLAK                                                                                                                                                                                                                                                                                                      | R | S | 95.00% | 37  | M1: Oxidation  | 403.2295  | 2 | 2.0  | 67  | 73  | No  |  |
|     |                                                       |        |                                                                      | NLVTEDVMR                                                                                                                                                                                                                                                                                                    | K | M | 95.00% | 33  | M8: Oxidation  | 1092.5440 | 1 | 7.6  | 58  | 66  | No  |  |
|     |                                                       |        |                                                                      | NLVTEDVMR                                                                                                                                                                                                                                                                                                    | K | M | 95.00% | 71  | M8: Oxidation  | 546.7750  | 2 | 5.6  | 58  | 66  | No  |  |
|     |                                                       |        |                                                                      | NLVTEDVMR                                                                                                                                                                                                                                                                                                    | K | M | 95.00% | 43  |                | 538.7761  | 2 | 3.1  | 58  | 66  | No  |  |
|     |                                                       |        |                                                                      | SNTPIVDGK                                                                                                                                                                                                                                                                                                    | R | D | 95.00% | 36  |                | 1043.5800 | 1 | 5.5  | 107 | 116 | No  |  |
|     |                                                       |        |                                                                      | SNTPIVDGK                                                                                                                                                                                                                                                                                                    | R | D | 95.00% | 67  |                | 522.2918  | 2 | 1.8  | 107 | 116 | No  |  |
|     |                                                       |        |                                                                      | SNTPIVDGKDVMEPVNK                                                                                                                                                                                                                                                                                            | R | V | 95.00% | 88  | M13: Oxidation | 986.5128  | 2 | 5.9  | 107 | 124 | No  |  |
|     |                                                       |        |                                                                      | SNTPIVDGKDVMEPVNK                                                                                                                                                                                                                                                                                            | R | V | 95.00% | 62  | M13: Oxidation | 658.0087  | 3 | 2.1  | 107 | 124 | No  |  |
|     |                                                       |        |                                                                      | SNTPIVDGKDVMEPVNK                                                                                                                                                                                                                                                                                            | R | V | 95.00% | 69  |                | 978.5147  | 2 | 5.2  | 107 | 124 | No  |  |
|     |                                                       |        |                                                                      | SPEDLER                                                                                                                                                                                                                                                                                                      | K | L | 95.00% | 43  |                | 423.2082  | 2 | 9.4  | 455 | 461 | No  |  |
|     |                                                       |        |                                                                      | TFTTQETITNAETAK                                                                                                                                                                                                                                                                                              | K | E | 95.00% | 134 |                | 828.4122  | 2 | 2.1  | 212 | 226 | No  |  |
|     |                                                       |        |                                                                      | TFTTQETITNAETAK                                                                                                                                                                                                                                                                                              | K | E | 95.00% | 47  |                | 552.6110  | 3 | 2.7  | 212 | 226 | No  |  |
|     |                                                       |        |                                                                      | TFTTQETITNAETAKEWFLQAAK                                                                                                                                                                                                                                                                                      | K | D | 95.00% | 65  |                | 877.1159  | 3 | 6.4  | 212 | 234 | No  |  |
|     |                                                       |        |                                                                      | TITDVINIGIGGSDLGPLMVTEAL                                                                                                                                                                                                                                                                                     |   |   |        |     |                |           |   |      |     |     |     |  |
|     |                                                       |        |                                                                      | KPYSSGGPR                                                                                                                                                                                                                                                                                                    | K | V | 95.00% | 122 | M19: Oxidation | 1115.5950 | 3 | 8.8  | 148 | 180 | No  |  |
|     |                                                       |        |                                                                      | TITDVINIGIGGSDLGPLMVTEAL                                                                                                                                                                                                                                                                                     |   |   |        |     |                |           |   |      |     |     |     |  |
|     |                                                       |        |                                                                      | KPYSSGGPR                                                                                                                                                                                                                                                                                                    | K | V | 95.00% | 30  | M19: Oxidation | 836.9495  | 4 | 9.9  | 148 | 180 | No  |  |
|     |                                                       |        |                                                                      | TITDVINIGIGGSDLGPLMVTEAL                                                                                                                                                                                                                                                                                     |   |   |        |     |                |           |   |      |     |     |     |  |
|     |                                                       |        |                                                                      | KPYSSGGPR                                                                                                                                                                                                                                                                                                    | K | V | 95.00% | 34  |                | 1110.2640 | 3 | 8.9  | 148 | 180 | No  |  |
|     |                                                       |        |                                                                      | TLAQLNPESSLFIIASK                                                                                                                                                                                                                                                                                            | K | T | 95.00% | 137 |                | 916.5075  | 2 | -5.4 | 195 | 211 | No  |  |
|     |                                                       |        |                                                                      | TLAQLNPESSLFIIASK                                                                                                                                                                                                                                                                                            | K | T | 95.00% | 81  |                | 611.3486  | 3 | 7.1  | 195 | 211 | No  |  |
|     |                                                       |        |                                                                      | VFEGNRPTNSIVFTK                                                                                                                                                                                                                                                                                              | K | L | 95.00% | 57  |                | 854.9586  | 2 | 4.1  | 467 | 481 | No  |  |
|     |                                                       |        |                                                                      | VFEGNRPTNSIVFTK                                                                                                                                                                                                                                                                                              | K | L | 95.00% | 44  |                | 570.3085  | 3 | 4.4  | 467 | 481 | No  |  |
|     |                                                       |        |                                                                      | VKEFGIDPQNMFEFWDVWGGR                                                                                                                                                                                                                                                                                        | K | Y | 95.00% | 64  | M11: Oxidation | 858.4082  | 3 | 6.5  | 253 | 273 | No  |  |
|     |                                                       |        |                                                                      | VWYYSNIDGTHIAK                                                                                                                                                                                                                                                                                               | R | T | 95.00% | 88  |                | 801.9222  | 2 | 5.3  | 181 | 194 | No  |  |
|     |                                                       |        |                                                                      | VWYYSNIDGTHIAK                                                                                                                                                                                                                                                                                               | R | T | 95.00% | 49  |                | 534.9507  | 3 | 5.3  | 181 | 194 | No  |  |
| 219 | IPI00027547                                           | DCD    | DERMCIDIN PRECURSOR.                                                 | DAVEDLESVGK                                                                                                                                                                                                                                                                                                  | K | G | 95.00% | 41  |                | 1161.5740 | 1 | 8.1  | 86  | 96  | No  |  |
|     |                                                       |        |                                                                      | DAVEDLESVGK                                                                                                                                                                                                                                                                                                  | K | G | 95.00% | 62  |                | 581.2897  | 2 | 6.5  | 86  | 96  | No  |  |
|     |                                                       |        |                                                                      | ENAGEDPGLAR                                                                                                                                                                                                                                                                                                  | K | Q | 95.00% | 72  |                | 564.7712  | 2 | 5.2  | 43  | 53  | No  |  |
|     |                                                       |        |                                                                      | LGKDAVEDLESVGK                                                                                                                                                                                                                                                                                               | K | G | 95.00% | 49  |                | 487.2620  | 3 | 3.8  | 83  | 96  | No  |  |
|     |                                                       |        |                                                                      | PROTEIN PHOSPHATASE 3 (FORMERLY 2B),<br>CATALYTIC SUBUNIT, BETA ISOFORM.; ISOFORM<br>3 OF SERINE/THREONINE-PROTEIN<br>PHOSPHATASE 2B CATALYTIC SUBUNITBETA<br>ISOFORM.; ISOFORM 2 OF SERINE/THREONINE-<br>PROTEIN PHOSPHATASE 2B CATALYTIC<br>SUBUNITBETA ISOFORM.; SERINE/THREONINE<br>PROTEIN PHOSPHATASE. |   |   |        |     |                |           |   |      |     |     |     |  |
| 220 | IPI00027809; IPI00181738; IPI00218862;<br>IPI00748557 | PPP3CB |                                                                      | GLTPTGMLPSGVLGGRR                                                                                                                                                                                                                                                                                            | K | Q | 95.00% | 75  | M7: Oxidation  | 800.4377  | 2 | 9.1  | 435 | 451 | No  |  |
|     |                                                       |        |                                                                      | HLTEYFTFK                                                                                                                                                                                                                                                                                                    | R | Q | 95.00% | 39  |                | 593.3068  | 2 | 9.6  | 164 | 172 | No  |  |
|     |                                                       |        |                                                                      | IINEGAILR                                                                                                                                                                                                                                                                                                    | R | R | 95.00% | 57  |                | 535.3246  | 2 | 3.9  | 73  | 82  | No  |  |
|     |                                                       |        |                                                                      | LFEVGGSPANTR                                                                                                                                                                                                                                                                                                 | K | Y | 95.00% | 69  |                | 624.3240  | 2 | 1.5  | 110 | 121 | Yes |  |
|     |                                                       |        |                                                                      | LTSEEVFDLDGIPR                                                                                                                                                                                                                                                                                               | R | V | 95.00% | 79  |                | 795.9076  | 2 | 3.5  | 38  | 51  | No  |  |
|     |                                                       |        |                                                                      | QTLQSATVEAIEAEK                                                                                                                                                                                                                                                                                              | R | A | 95.00% | 36  |                | 809.4277  | 2 | 8.5  | 452 | 466 | No  |  |
| 221 | IPI00028004; IPI00788896; IPI00789577                 | PSMB3  | PROTEASOME SUBUNIT BETA TYPE 3.; 13 KDA<br>PROTEIN.; 12 KDA PROTEIN. | FGIQAQMVTTDFQK                                                                                                                                                                                                                                                                                               | R | I | 95.00% | 82  | M7: Oxidation  | 815.4073  | 2 | 7.4  | 28  | 41  | No  |  |
|     |                                                       |        |                                                                      | LNLYELK                                                                                                                                                                                                                                                                                                      | R | E | 95.00% | 32  |                | 446.7625  | 2 | 3.1  | 71  | 77  | No  |  |
|     |                                                       |        |                                                                      | LYIGLAGLATDVQTVQAR                                                                                                                                                                                                                                                                                           | R | L | 95.00% | 80  |                | 630.3611  | 3 | 9.6  | 49  | 66  | No  |  |
|     |                                                       |        |                                                                      | ISOFORM 1 OF NADH DEHYDROGENASE<br>[UBIQUINONE] FLAVOPROTEIN<br>1,MITOCHONDRIAL PRECURSOR.; ISOFORM 2 OF<br>NADH DEHYDROGENASE [UBIQUINONE]<br>FLAVOPROTEIN 1,MITOCHONDRIAL<br>PRECURSOR.                                                                                                                    |   |   |        |     |                |           |   |      |     |     |     |  |
| 222 | IPI00028520; IPI00221298                              | NDUFV1 |                                                                      | AAYIYIR                                                                                                                                                                                                                                                                                                      | R | G | 95.00% | 46  |                | 435.2495  | 2 | 3.1  | 153 | 159 | No  |  |
|     |                                                       |        |                                                                      | EAYEAGLIGK                                                                                                                                                                                                                                                                                                   | R | N | 95.00% | 51  |                | 1050.5520 | 1 | 4.6  | 175 | 184 | No  |  |
|     |                                                       |        |                                                                      | EAYEAGLIGK                                                                                                                                                                                                                                                                                                   | R | N | 95.00% | 49  |                | 525.7791  | 2 | 2.9  | 175 | 184 | No  |  |
|     |                                                       |        |                                                                      | GDARPAEIDSLWEISK                                                                                                                                                                                                                                                                                             | R | Q | 95.00% | 33  |                | 893.9592  | 2 | 7.2  | 402 | 417 | No  |  |
|     |                                                       |        |                                                                      | GDARPAEIDSLWEISK                                                                                                                                                                                                                                                                                             | R | Q | 95.00% | 59  |                | 596.3077  | 3 | 5.5  | 402 | 417 | No  |  |
|     |                                                       |        |                                                                      | GEFYNEASNLQVAIR                                                                                                                                                                                                                                                                                              | R | E | 95.00% | 97  |                | 855.9335  | 2 | 8.3  | 160 | 174 | No  |  |
|     |                                                       |        |                                                                      | GEFYNEASNLQVAIR                                                                                                                                                                                                                                                                                              | R | E | 95.00% | 57  |                | 570.9564  | 3 | 5.0  | 160 | 174 | No  |  |
|     |                                                       |        |                                                                      | GGAGFPTGLK                                                                                                                                                                                                                                                                                                   | R | W | 95.00% | 40  |                | 452.7507  | 2 | 4.6  | 89  | 98  | No  |  |
|     |                                                       |        |                                                                      | GGTWFAFGFR                                                                                                                                                                                                                                                                                                   | R | E | 95.00% | 56  |                | 528.2587  | 2 | 3.0  | 258 | 267 | No  |  |
|     |                                                       |        |                                                                      | GPDWILGEIK                                                                                                                                                                                                                                                                                                   | K | T | 95.00% | 55  |                | 564.3106  | 2 | 2.6  | 72  | 81  | No  |  |
|     |                                                       |        |                                                                      | HFRPELEER                                                                                                                                                                                                                                                                                                    | R | M | 95.00% | 54  |                | 606.8124  | 2 | 3.5  | 441 | 449 | No  |  |
|     |                                                       |        |                                                                      | HFRPELEER                                                                                                                                                                                                                                                                                                    | R | M | 95.00% | 43  |                | 404.8772  | 3 | 2.8  | 441 | 449 | No  |  |
|     |                                                       |        |                                                                      | IFTNLYGR                                                                                                                                                                                                                                                                                                     | R | H | 95.00% | 42  |                | 492.2717  | 2 | 4.2  | 41  | 48  | No  |  |

|     |                          |         |                                                                                                                               |                         |   |   |        |     |                                   |           |   |     |     |     |    |
|-----|--------------------------|---------|-------------------------------------------------------------------------------------------------------------------------------|-------------------------|---|---|--------|-----|-----------------------------------|-----------|---|-----|-----|-----|----|
|     |                          |         |                                                                                                                               | LIEFYK                  | R | H | 95.00% | 28  |                                   | 406.7328  | 2 | 2.4 | 370 | 375 | No |
|     |                          |         |                                                                                                                               | PAEIDSLWEISK            | R | Q | 95.00% | 86  |                                   | 694.3638  | 2 | 6.3 | 406 | 417 | No |
|     |                          |         |                                                                                                                               | TSFGSLKDEDR             | K | I | 95.00% | 52  |                                   | 627.8049  | 2 | 4.2 | 30  | 40  | No |
| 223 | IPI00029111              | DPYSL3  | DPYSL3 PROTEIN.                                                                                                               | AALAGGTTMIIDHVVPEPESLTT | K | W | 95.00% | 40  | M9: Oxidation                     | 982.4958  | 3 | 9.0 | 209 | 236 | No |
|     |                          |         |                                                                                                                               | EAYEK                   | K | M | 95.00% | 67  |                                   | 874.9136  | 2 | 5.8 | 460 | 475 | No |
|     |                          |         |                                                                                                                               | DNFTAPEGTNGVEER         | K | A | 95.00% | 63  | M2: Oxidation                     | 731.8337  | 2 | 4.8 | 196 | 208 | No |
|     |                          |         |                                                                                                                               | GMTTVDFFQGTG            | R | G | 95.00% | 75  | M2: Oxidation                     | 829.3978  | 2 | 5.4 | 611 | 625 | No |
|     |                          |         |                                                                                                                               | GMYDGPVFDLTTTPK         | K | K | 95.00% | 47  |                                   | 461.7646  | 2 | 6.8 | 505 | 511 | No |
|     |                          |         |                                                                                                                               | IFNLNLYPR               | R | I | 95.00% | 61  |                                   | 958.4952  | 2 | 8.9 | 515 | 532 | No |
|     |                          |         |                                                                                                                               | ISVGSDDLVIWDPDAVK       | R | Q | 95.00% | 99  | M14: Oxidation                    | 1183.0590 | 2 | 7.9 | 138 | 157 | No |
|     |                          |         |                                                                                                                               | IVNDDQSFYADIYMEDGLIK    | K | I | 95.00% | 98  | M1: Oxidation                     | 871.4132  | 2 | 6.7 | 489 | 504 | No |
|     |                          |         |                                                                                                                               | MDENQFVAVTSTNAAK        | K | G | 95.00% | 34  | M14: Oxidation                    | 675.6497  | 3 | 9.8 | 538 | 554 | No |
|     |                          |         |                                                                                                                               | NHQSAAEYNIFEGMELR       | R | S | 95.00% | 82  |                                   | 1016.0080 | 2 | 8.8 | 646 | 664 | No |
|     |                          |         |                                                                                                                               | NLHQSGFSLSGTQVDEGVR     | R | S | 95.00% | 43  |                                   | 677.6709  | 3 | 3.7 | 646 | 664 | No |
|     |                          |         |                                                                                                                               | NLHQSGFSLSGTQVDEGVR     | K | D | 95.00% | 27  |                                   | 486.2822  | 2 | 4.0 | 264 | 271 | No |
|     |                          |         |                                                                                                                               | QEVQNLIK                | K | T | 95.00% | 31  |                                   | 655.3825  | 2 | 6.8 | 158 | 170 | No |
|     |                          |         |                                                                                                                               | QIGDNLIVPGGVK           | K | K | 95.00% | 84  |                                   | 516.2810  | 2 | 5.4 | 373 | 382 | No |
|     |                          |         |                                                                                                                               | SAADLISQAR              |   |   |        |     |                                   |           |   |     |     |     |    |
|     |                          |         | ATP SYNTHASE B CHAIN, MITOCHONDRIAL<br>PRECURSOR.; ATP SYNTHASE, H+<br>TRANSPORTING, MITOCHONDRIAL F0 COMPLEX,<br>SUBUNIT B1. |                         |   |   |        |     |                                   |           |   |     |     |     |    |
| 224 | IPI00029133; IPI00456747 | ATP5F1  |                                                                                                                               | EQEHMINWVEK             | K | H | 95.00% | 41  | M5: Oxidation                     | 729.8453  | 2 | 9.6 | 211 | 221 | No |
|     |                          |         |                                                                                                                               | HVQQSISTQOEK            | K | E | 95.00% | 75  |                                   | 692.3701  | 2 | 6.5 | 222 | 233 | No |
|     |                          |         |                                                                                                                               | HVQVQSISTQOEKETIAK      | K | C | 95.00% | 116 |                                   | 963.5268  | 2 | 8.3 | 222 | 238 | No |
|     |                          |         |                                                                                                                               | HVQVQSISTQOEKETIAK      | K | C | 95.00% | 46  |                                   | 642.6860  | 3 | 6.5 | 222 | 238 | No |
|     |                          |         |                                                                                                                               | HYLFDVQR                | R | N | 95.00% | 37  |                                   | 539.2826  | 2 | 8.5 | 164 | 171 | No |
|     |                          |         |                                                                                                                               | LAQLEEAK                | K | Q | 95.00% | 37  |                                   | 451.2557  | 2 | 4.4 | 132 | 139 | No |
|     |                          |         |                                                                                                                               | LDYHISVQNMMR            | R | R | 95.00% | 45  | M10: Oxidation,<br>M11: Oxidation | 769.8623  | 2 | 4.7 | 197 | 208 | No |
|     |                          |         |                                                                                                                               | LDYHISVQNMMR            | R | R | 95.00% | 41  | M11: Oxidation                    | 513.5770  | 3 | 3.8 | 197 | 208 | No |
|     |                          |         |                                                                                                                               | LDYHISVQNMMR            | R | R | 95.00% | 33  |                                   | 753.8697  | 2 | 7.8 | 197 | 208 | No |
|     |                          |         |                                                                                                                               | LDYHISVQNMMR            | R | R | 95.00% | 49  |                                   | 502.9147  | 3 | 5.8 | 197 | 208 | No |
|     |                          |         |                                                                                                                               | NNIAMALEVTYR            | R | E | 95.00% | 86  | M5: Oxidation                     | 705.8628  | 2 | 8.9 | 172 | 183 | No |
|     |                          |         |                                                                                                                               | QASIQHIQNAIDTEK         | K | S | 95.00% | 96  |                                   | 848.4421  | 2 | 5.7 | 140 | 154 | No |
|     |                          |         |                                                                                                                               | YGLIPEEFFQFLYPK         | R | T | 95.00% | 48  |                                   | 945.9957  | 2 | 7.9 | 56  | 70  | No |
|     |                          |         |                                                                                                                               | YGPVFADFADK             | K | L | 95.00% | 71  |                                   | 615.3011  | 2 | 8.0 | 116 | 126 | No |
|     |                          |         |                                                                                                                               | YGPVFADFADKLEQK         | K | L | 95.00% | 84  |                                   | 921.4667  | 2 | 9.7 | 116 | 131 | No |
|     |                          |         |                                                                                                                               | YGPVFADFADKLEQK         | K | L | 95.00% | 62  |                                   | 614.6461  | 3 | 8.2 | 116 | 131 | No |
| 225 | IPI00029264              | CYC1    | CYTOCHROME C1 HEME PROTEIN,<br>MITOCHONDRIAL PRECURSOR.                                                                       | ELAAEVEVQDGPINEDGEMFMR  |   |   |        |     |                                   |           |   |     |     |     |    |
|     |                          |         |                                                                                                                               | PGK                     | K | L | 95.00% | 104 | M18: Oxidation,<br>M20: Oxidation | 894.0748  | 3 | 8.0 | 147 | 170 | No |
|     |                          |         |                                                                                                                               | GLLSSLDHTSIR            | R | R | 95.00% | 80  |                                   | 649.8622  | 2 | 7.4 | 100 | 111 | No |
|     |                          |         |                                                                                                                               | GLLSSLDHTSIR            | R | R | 95.00% | 43  |                                   | 433.5775  | 3 | 7.8 | 100 | 111 | No |
|     |                          |         |                                                                                                                               | GLLSSLDHTSIR            | R | G | 95.00% | 34  |                                   | 485.6098  | 3 | 3.9 | 100 | 112 | No |
|     |                          |         |                                                                                                                               | LFDYFPK                 | K | P | 95.00% | 27  |                                   | 465.2449  | 2 | 5.0 | 171 | 177 | No |
|     |                          |         |                                                                                                                               | LFDYFPKYPNSEAAR         | K | A | 95.00% | 50  |                                   | 638.9910  | 3 | 9.6 | 171 | 186 | No |
| 226 | IPI00029558              | NDUFC2  | NADH DEHYDROGENASE [UBIQUINONE] 1<br>SUBUNIT C2.                                                                              | EDYLYAVR                | R | D | 95.00% | 36  |                                   | 514.7610  | 2 | 8.5 | 78  | 85  | No |
|     |                          |         |                                                                                                                               | LHPEDFPEEDKK            | K | T | 95.00% | 38  |                                   | 742.3630  | 2 | 7.5 | 95  | 106 | No |
|     |                          |         |                                                                                                                               | LHPEDFPEEDKK            | K | T | 95.00% | 32  |                                   | 495.2417  | 3 | 1.5 | 95  | 106 | No |
|     |                          |         |                                                                                                                               | TYGEIFEK                | K | F | 95.00% | 30  |                                   | 493.7483  | 2 | 5.3 | 107 | 114 | No |
|     |                          |         | NADH DEHYDROGENASE [UBIQUINONE] 1 ALPHA<br>SUBCOMPLEX SUBUNIT 10, MITOCHONDRIAL<br>PRECURSOR.                                 |                         |   |   |        |     |                                   |           |   |     |     |     |    |
| 227 | IPI00029561              | NDUFA10 |                                                                                                                               | ITSAYLQDIENAYK          | K | K | 95.00% | 96  |                                   | 814.9180  | 2 | 6.7 | 229 | 242 | No |
|     |                          |         |                                                                                                                               | ITSAYLQDIENAYK          | K | T | 95.00% | 91  |                                   | 878.9680  | 2 | 9.0 | 229 | 243 | No |
|     |                          |         |                                                                                                                               | ITSAYLQDIENAYK          | K | T | 95.00% | 33  |                                   | 586.3134  | 3 | 7.0 | 229 | 243 | No |
|     |                          |         |                                                                                                                               | KVVIEDIEYLK             | K | F | 95.00% | 61  |                                   | 618.3508  | 2 | 4.0 | 268 | 277 | No |
|     |                          |         |                                                                                                                               | KYSPGYNTEVGDK           | R | W | 95.00% | 36  |                                   | 729.3553  | 2 | 7.9 | 338 | 350 | No |
|     |                          |         |                                                                                                                               | LLQYSDALEHLLTGQGVFLER   | R | S | 95.00% | 69  |                                   | 819.1183  | 3 | 8.1 | 140 | 161 | No |
|     |                          |         |                                                                                                                               | LLQYSDALEHLLTGQGVFLER   | R | S | 95.00% | 46  |                                   | 614.5908  | 4 | 8.2 | 140 | 161 | No |
|     |                          |         |                                                                                                                               | LLQYSDALEHLLTGQGVFLER   | R | L | 95.00% | 50  |                                   | 570.2997  | 2 | 5.9 | 131 | 139 | No |
|     |                          |         |                                                                                                                               | VVEDIEYLK               | K | F | 95.00% | 40  |                                   | 1107.6010 | 1 | 6.6 | 269 | 277 | No |
|     |                          |         |                                                                                                                               | VVEDIEYLK               | K | F | 95.00% | 38  |                                   | 554.3051  | 2 | 7.7 | 269 | 277 | No |
| 228 | IPI00029623              | PSMA6   | PROTEASOME SUBUNIT ALPHA TYPE 6.                                                                                              | AINQGGTSSVAVR           | K | G | 95.00% | 97  |                                   | 643.3694  | 2 | 6.3 | 31  | 43  | No |
|     |                          |         |                                                                                                                               | HITIFSPETR              | R | L | 95.00% | 31  |                                   | 578.8127  | 2 | 5.3 | 12  | 21  | No |
|     |                          |         |                                                                                                                               | LLDSSTVTHLFFK           | K | I | 95.00% | 79  |                                   | 680.8838  | 2 | 9.0 | 60  | 71  | No |
|     |                          |         |                                                                                                                               | LLDSSTVTHLFFK           | K | I | 95.00% | 49  |                                   | 454.2566  | 3 | 4.7 | 60  | 71  | No |
|     |                          |         |                                                                                                                               | LYQVEYAFK               | R | A | 95.00% | 51  |                                   | 580.8082  | 2 | 8.0 | 22  | 30  | No |

|     |             |        |                                      |                          |   |   |        |     |                              |           |   |      |      |      |     |
|-----|-------------|--------|--------------------------------------|--------------------------|---|---|--------|-----|------------------------------|-----------|---|------|------|------|-----|
| 229 | IPI00029722 | KIF5A  | KINESIN HEAVY CHAIN ISOFORM 5A.      | ISFLENNLEQLTK            | K | V | 95.00% | 62  |                              | 774.9250  | 2 | 9.5  | 830  | 842  | No  |
|     |             |        |                                      | TGAEGAVLDEAK             | K | N | 95.00% | 41  |                              | 580.7980  | 2 | 6.8  | 242  | 253  | No  |
| 230 | IPI00030104 | MYBPC2 | MYOSIN-BINDING PROTEIN C, FAST-TYPE. | AGPPINVMVK               | K | E | 95.00% | 84  | M8: Oxidation                | 521.2938  | 2 | 2.7  | 934  | 943  | No  |
|     |             |        |                                      | ASEQAVFK                 | K | C | 95.00% | 44  |                              | 440.2342  | 2 | 3.5  | 452  | 459  | No  |
|     |             |        |                                      | AVNELGEALAECK            | R | L | 95.00% | 88  |                              | 673.8409  | 2 | 8.4  | 1123 | 1135 | No  |
|     |             |        |                                      | DDGNSEIMGYFVQK           | K | A | 95.00% | 97  | M8: Oxidation                | 809.8613  | 2 | 5.4  | 959  | 972  | No  |
|     |             |        |                                      | DDGNSEIMGYFVQK           | K | A | 95.00% | 77  |                              | 801.8635  | 2 | 5.1  | 959  | 972  | No  |
|     |             |        |                                      | DGVELTREDSFK             | K | A | 95.00% | 64  |                              | 698.3447  | 2 | 4.3  | 381  | 392  | No  |
|     |             |        |                                      | DGVELTREDSFK             | K | A | 95.00% | 40  |                              | 465.8989  | 3 | 3.9  | 381  | 392  | No  |
|     |             |        |                                      | EAPAEAPKEAPPEDQSPSTAEPP  |   |   |        |     |                              |           |   |      |      |      |     |
|     |             |        |                                      | TGVFLK                   | K | K | 95.00% | 67  |                              | 979.1553  | 3 | 9.9  | 29   | 56   | No  |
|     |             |        |                                      | EAPPEDQSPSTAEPTGVFLK     | K | K | 95.00% | 50  | S8: Phospho                  | 1111.5040 | 2 | 4.6  | 37   | 56   | No  |
|     |             |        |                                      | EAPPEDQSPSTAEPTGVFLK     | K | K | 95.00% | 99  |                              | 1071.5230 | 2 | 6.2  | 37   | 56   | No  |
|     |             |        |                                      | EAPPEDQSPSTAEPTGVFLK     | K | K | 95.00% | 38  |                              | 714.6819  | 3 | 2.7  | 37   | 56   | No  |
|     |             |        |                                      | EAPPKEAPAEAPK            | K | E | 95.00% | 59  |                              | 667.8566  | 2 | 7.2  | 24   | 36   | No  |
|     |             |        |                                      | EAPPKEAPAEAPK            | K | E | 95.00% | 43  |                              | 445.5719  | 3 | 3.2  | 24   | 36   | No  |
|     |             |        |                                      | EPPVLIVTPLEDQQVFGDR      | K | V | 95.00% | 94  |                              | 1126.1100 | 2 | 6.8  | 343  | 362  | No  |
|     |             |        |                                      | EPPVLIVTPLEDQQVFGDR      | K | V | 95.00% | 51  |                              | 751.0766  | 3 | 7.4  | 343  | 362  | No  |
|     |             |        |                                      | ESHNSASNVYTVLHIGK        | K | V | 95.00% | 99  |                              | 992.9898  | 2 | -0.6 | 108  | 125  | No  |
|     |             |        |                                      | ESHNSASNVYTVLHIGK        | K | V | 95.00% | 62  |                              | 662.3326  | 3 | 4.7  | 108  | 125  | No  |
|     |             |        |                                      | EVWGTNALVEWQAPK          | K | D | 95.00% | 79  |                              | 864.4479  | 2 | 7.0  | 944  | 958  | No  |
|     |             |        |                                      | FLITNYQGVLTNLIR          | K | R | 95.00% | 95  |                              | 883.0123  | 2 | 8.8  | 1095 | 1109 | No  |
|     |             |        |                                      | FLTPLDIR                 | K | V | 95.00% | 48  |                              | 487.7895  | 2 | 3.5  | 1051 | 1058 | No  |
|     |             |        |                                      | GDEVFTTTEGR              | K | T | 95.00% | 53  |                              | 1211.5660 | 1 | 9.3  | 582  | 592  | No  |
|     |             |        |                                      | GDEVFTTTEGR              | K | T | 95.00% | 71  |                              | 606.2844  | 2 | 5.1  | 582  | 592  | No  |
|     |             |        |                                      | HILIFSDVQEDR             | R | G | 95.00% | 110 |                              | 785.9206  | 2 | 6.6  | 404  | 416  | No  |
|     |             |        |                                      | HILIFSDVQEDR             | R | G | 95.00% | 70  |                              | 524.2827  | 3 | 5.8  | 404  | 416  | No  |
|     |             |        |                                      | IAFQYGITDLR              | K | G | 95.00% | 78  |                              | 648.8547  | 2 | 4.7  | 229  | 239  | Yes |
|     |             |        |                                      | IKLMVEISDPDLTK           | K | W | 95.00% | 36  | M4: Oxidation                | 865.9922  | 2 | 8.5  | 274  | 288  | No  |
|     |             |        |                                      | IKLMVEISDPDLTK           | K | W | 95.00% | 48  | M4: Oxidation                | 577.6629  | 3 | 6.4  | 274  | 288  | No  |
|     |             |        |                                      | KDDDDLGPPEIWELK          | K | G | 95.00% | 97  |                              | 998.5277  | 2 | 9.5  | 203  | 219  | No  |
|     |             |        |                                      | KKDDDDLGPPEIWELK         | K | G | 95.00% | 83  |                              | 1062.5750 | 2 | 9.1  | 202  | 219  | No  |
|     |             |        |                                      | KKDDDDLGPPEIWELK         | K | G | 95.00% | 49  |                              | 708.7167  | 3 | 5.2  | 202  | 219  | No  |
|     |             |        |                                      | KKDDDDLGPPEIWELK         | K | G | 95.00% | 62  |                              | 531.7889  | 4 | 4.0  | 202  | 219  | No  |
|     |             |        |                                      | KLDPAYQVDR               | K | G | 95.00% | 57  |                              | 602.8245  | 2 | 6.9  | 261  | 270  | No  |
|     |             |        |                                      | KLDPAYQVDR               | K | G | 95.00% | 44  |                              | 402.2178  | 3 | 4.2  | 261  | 270  | No  |
|     |             |        |                                      | KPDSVSVETGKDAVVVAK       | K | V | 95.00% | 140 |                              | 915.0111  | 2 | 6.7  | 57   | 74   | No  |
|     |             |        |                                      | KPDSVSVETGKDAVVVAK       | K | V | 95.00% | 72  |                              | 610.3418  | 3 | 4.2  | 57   | 74   | No  |
|     |             |        |                                      | KPDSVSVETGKDAVVVAK       | K | V | 95.00% | 64  |                              | 458.0073  | 4 | 1.9  | 57   | 74   | No  |
|     |             |        |                                      | KSDTAGELDFSGLLK          | K | K | 95.00% | 112 |                              | 790.9169  | 2 | 5.3  | 175  | 189  | No  |
|     |             |        |                                      | KSDTAGELDFSGLLK          | K | K | 95.00% | 57  |                              | 527.6132  | 3 | 4.1  | 175  | 189  | No  |
|     |             |        |                                      | KVGEQLNLVVPFQGK          | R | P | 95.00% | 99  |                              | 828.4804  | 2 | 2.6  | 854  | 868  | No  |
|     |             |        |                                      | KVGEQLNLVVPFQGK          | R | P | 95.00% | 41  |                              | 552.6580  | 3 | 5.9  | 854  | 868  | No  |
|     |             |        |                                      | KVGEQLNLVVPFQGKPR        | R | P | 95.00% | 104 |                              | 955.0633  | 2 | 8.4  | 854  | 870  | No  |
|     |             |        |                                      | KVGEQLNLVVPFQGKPR        | R | P | 95.00% | 70  |                              | 637.0428  | 3 | 5.2  | 854  | 870  | No  |
|     |             |        |                                      | KVGEQLNLVVPFQGKPR        | R | P | 95.00% | 34  |                              | 478.0330  | 4 | 3.1  | 854  | 870  | No  |
|     |             |        |                                      | LDVSITGEPPIVATWLK        | R | G | 95.00% | 63  |                              | 912.0061  | 2 | 4.7  | 565  | 581  | No  |
|     |             |        |                                      | LMVEISDPDLTK             | K | W | 95.00% | 65  | M2: Oxidation                | 745.3996  | 2 | 5.9  | 276  | 288  | No  |
|     |             |        |                                      | LMVEISDPDLTK             | K | W | 95.00% | 103 |                              | 737.4012  | 2 | 4.7  | 276  | 288  | No  |
|     |             |        |                                      | LNFEVFTETTYESTK          | K | M | 95.00% | 120 |                              | 904.9426  | 2 | 9.9  | 689  | 703  | No  |
|     |             |        |                                      | LNFLLEIK                 | K | V | 95.00% | 61  |                              | 438.7655  | 2 | 4.1  | 524  | 530  | No  |
|     |             |        |                                      | LNFLLEIKVEYVPK           | K | Q | 95.00% | 41  |                              | 796.4658  | 2 | 8.5  | 524  | 536  | No  |
|     |             |        |                                      | LNFLLEIKVEYVPK           | K | Q | 95.00% | 29  |                              | 531.3115  | 3 | 5.4  | 524  | 536  | No  |
|     |             |        |                                      | MIEGILYEMR               | K | V | 95.00% | 59  | M1: Oxidation                | 635.8143  | 2 | 2.5  | 704  | 713  | No  |
|     |             |        |                                      | MIEGILYEMR               | K | V | 95.00% | 64  | M1: Oxidation                | 643.8119  | 2 | 2.8  | 704  | 713  | No  |
|     |             |        |                                      | MIEGILYEMR               | K | V | 95.00% | 67  | M1: Oxidation, M9: Oxidation | 643.8129  | 2 | 4.3  | 704  | 713  | No  |
|     |             |        |                                      | MIEGILYEMR               | K | V | 95.00% | 60  | M9: Oxidation                | 635.8143  | 2 | 2.5  | 704  | 713  | No  |
|     |             |        |                                      | MIEGILYEMR               | K | V | 95.00% | 75  |                              | 627.8180  | 2 | 4.4  | 704  | 713  | No  |
|     |             |        |                                      | PFMPIAPTSEPLHLIVEDVTDTTT |   |   |        |     |                              |           |   |      |      |      |     |
|     |             |        |                                      | TLK                      | K | W | 95.00% | 63  | M3: Oxidation                | 994.8582  | 3 | 7.0  | 731  | 757  | No  |
|     |             |        |                                      | PQVWVTK                  | R | G | 95.00% | 30  |                              | 429.2496  | 2 | 3.3  | 871  | 877  | No  |
|     |             |        |                                      | QDASGQSLESFKR            | R | R | 95.00% | 67  |                              | 648.8117  | 2 | 6.3  | 158  | 169  | No  |
|     |             |        |                                      | QDASGQSLESFKR            | R | T | 95.00% | 43  |                              | 726.8595  | 2 | 1.9  | 158  | 170  | No  |
|     |             |        |                                      | QDASGQSLESFKR            | R | T | 95.00% | 49  |                              | 484.9096  | 3 | 3.4  | 158  | 170  | No  |
|     |             |        |                                      | QLEVLQDIADLTVK           | K | A | 95.00% | 126 |                              | 792.9480  | 2 | 1.9  | 438  | 451  | No  |
|     |             |        |                                      | QLEVLQDIADLTVK           | K | A | 95.00% | 75  |                              | 528.9690  | 3 | 3.9  | 438  | 451  | No  |
|     |             |        |                                      | RHILIFSDVQEDR            | K | G | 95.00% | 74  |                              | 576.3157  | 3 | 4.2  | 403  | 416  | No  |
|     |             |        |                                      | SDSGEYELSVQIENMK         | R | D | 95.00% | 88  | M15: Oxidation               | 922.9238  | 2 | 9.5  | 906  | 921  | No  |
|     |             |        |                                      | SDSGEYELSVQIENMK         | R | D | 95.00% | 99  |                              | 914.9232  | 2 | 6.1  | 906  | 921  | No  |

|                      |             |       |                                                        |                          |             |       |                                                     |                                                     |                |           |        |     |               |           |    |     |     |     |    |
|----------------------|-------------|-------|--------------------------------------------------------|--------------------------|-------------|-------|-----------------------------------------------------|-----------------------------------------------------|----------------|-----------|--------|-----|---------------|-----------|----|-----|-----|-----|----|
| 231                  | IPI00030182 | GAMT  | GUANIDINOACETATE N-METHYLTRANSFERASE.                  | SDSGEYELSVQIENMKDTATIR   | R           | I     | 95.00%                                              | 86                                                  | M15: Oxidation | 834.7315  | 3      | 4.9 | 906           | 927       | No |     |     |     |    |
|                      |             |       |                                                        | SDTAGELDFSGLLK           | K           | K     | 95.00%                                              | 108                                                 |                | 726.8718  | 2      | 9.1 | 176           | 189       | No |     |     |     |    |
|                      |             |       |                                                        | SDTAGELDFSGLLKK          | K           | R     | 95.00%                                              | 51                                                  |                | 790.9183  | 2      | 7.2 | 176           | 190       | No |     |     |     |    |
|                      |             |       |                                                        | TGITFKPFYK               | K           | E     | 95.00%                                              | 51                                                  |                | 665.8602  | 2      | 5.7 | 1031          | 1041      | No |     |     |     |    |
|                      |             |       |                                                        | TGITFKPFYK               | K           | E     | 95.00%                                              | 36                                                  |                | 444.2413  | 3      | 2.5 | 1031          | 1041      | No |     |     |     |    |
|                      |             |       |                                                        | TGITFKPFYKHEDFR          | K           | M     | 95.00%                                              | 35                                                  |                | 672.3436  | 3      | 6.1 | 1031          | 1046      | No |     |     |     |    |
|                      |             |       |                                                        | TMEWFNYYER               | K           | N     | 95.00%                                              | 66                                                  | M2: Oxidation  | 695.8127  | 2      | 5.4 | 977           | 986       | No |     |     |     |    |
|                      |             |       |                                                        | TSDFDTVFFVR              | R           | Q     | 95.00%                                              | 86                                                  |                | 667.3277  | 2      | 3.6 | 891           | 901       | No |     |     |     |    |
|                      |             |       |                                                        | TSENAIVVAGNK             | K           | L     | 95.00%                                              | 113                                                 |                | 651.3600  | 2      | 4.3 | 550           | 562       | No |     |     |     |    |
|                      |             |       |                                                        | VFAVNAIGVSQPSMNTK        | R           | P     | 95.00%                                              | 93                                                  | M14: Oxidation | 889.9654  | 2      | 6.7 | 714           | 730       | No |     |     |     |    |
|                      |             |       |                                                        | VFAVNAIGVSQPSMNTK        | R           | P     | 95.00%                                              | 41                                                  | M14: Oxidation | 593.6458  | 3      | 6.0 | 714           | 730       | No |     |     |     |    |
|                      |             |       |                                                        | VFAVNAIGVSQPSMNTK        | R           | P     | 95.00%                                              | 112                                                 |                | 881.9672  | 2      | 5.8 | 714           | 730       | No |     |     |     |    |
|                      |             |       |                                                        | VGEQLNLVVPFQK            | K           | P     | 95.00%                                              | 66                                                  |                | 764.4358  | 2      | 6.6 | 855           | 868       | No |     |     |     |    |
|                      |             |       |                                                        | VGEQLNLVVPFQKPR          | K           | P     | 95.00%                                              | 66                                                  |                | 891.0132  | 2      | 6.1 | 855           | 870       | No |     |     |     |    |
|                      |             |       |                                                        | VGEQLNLVVPFQKPR          | K           | P     | 95.00%                                              | 68                                                  |                | 594.3434  | 3      | 3.8 | 855           | 870       | No |     |     |     |    |
|                      |             |       |                                                        | VVGVNIAGR                | R           | T     | 95.00%                                              | 64                                                  |                | 442.7708  | 2      | 2.2 | 812           | 820       | No |     |     |     |    |
|                      |             |       |                                                        | WLELGSK                  | K           | S     | 95.00%                                              | 48                                                  |                | 832.4630  | 1      | 7.3 | 93            | 99        | No |     |     |     |    |
|                      |             |       |                                                        | YVFENVGK                 | K           | K     | 95.00%                                              | 37                                                  |                | 955.4952  | 1      | 6.7 | 302           | 309       | No |     |     |     |    |
|                      |             |       |                                                        | YVFENVGK                 | K           | K     | 95.00%                                              | 34                                                  |                | 478.2501  | 2      | 3.8 | 302           | 309       | No |     |     |     |    |
|                      |             |       |                                                        | 231                      | IPI00030182 | GAMT  | GUANIDINOACETATE N-METHYLTRANSFERASE.               | VLEVFGMGIAASK                                       | R              | V         | 95.00% | 68  | M8: Oxidation | 704.8863  | 2  | 9.7 | 64  | 77  | No |
|                      |             |       |                                                        |                          |             |       |                                                     | WETPYMHALAAAASK                                     | R              | G         | 95.00% | 40  | M6: Oxidation | 875.4223  | 2  | 5.7 | 45  | 60  | No |
|                      |             |       |                                                        |                          |             |       |                                                     | YYAFPQMITPLVTK                                      | R              | -         | 95.00% | 41  | M7: Oxidation | 844.4495  | 2  | 8.2 | 222 | 235 | No |
|                      |             |       |                                                        |                          |             |       |                                                     | HEAT SHOCK PROTEIN 75 KDA, MITOCHONDRIAL PRECURSOR. |                |           |        |     |               |           |    |     |     |     |    |
|                      |             |       |                                                        | 232                      | IPI00030275 | TRAP1 | HEAT SHOCK PROTEIN 75 KDA, MITOCHONDRIAL PRECURSOR. | AFLDALQNQAEASSK                                     | K              | I         | 95.00% | 91  |               | 796.9044  | 2  | 5.5 | 182 | 196 | No |
| AQLLQPTLEINPR        | R           | H     | 95.00%                                                 |                          |             |       |                                                     | 62                                                  |                | 746.9305  | 2      | 2.9 | 635           | 647       | No |     |     |     |    |
| EGIVTATEQEVEKEDIAK   | R           | L     | 95.00%                                                 |                          |             |       |                                                     | 80                                                  |                | 930.4894  | 2      | 5.6 | 450           | 466       | No |     |     |     |    |
| EGIVTATEQEVEKEDIAK   | R           | L     | 95.00%                                                 |                          |             |       |                                                     | 33                                                  |                | 620.6636  | 3      | 7.9 | 450           | 466       | No |     |     |     |    |
| ELGSSVALYSR          | R           | K     | 95.00%                                                 |                          |             |       |                                                     | 36                                                  |                | 591.3135  | 2      | 2.2 | 358           | 368       | No |     |     |     |    |
| ELISNASDALEK         | R           | L     | 95.00%                                                 |                          |             |       |                                                     | 59                                                  |                | 645.3383  | 2      | 7.5 | 115           | 126       | No |     |     |     |    |
| ELLQESALIR           | R           | K     | 95.00%                                                 |                          |             |       |                                                     | 65                                                  |                | 586.3403  | 2      | 3.3 | 403           | 412       | No |     |     |     |    |
| GVVDSEDIPLNLSR       | R           | E     | 95.00%                                                 |                          |             |       |                                                     | 96                                                  |                | 757.4001  | 2      | 4.0 | 389           | 402       | No |     |     |     |    |
| GVVDSEDIPLNLSR       | R           | E     | 95.00%                                                 |                          |             |       |                                                     | 51                                                  |                | 505.2707  | 3      | 6.7 | 389           | 402       | No |     |     |     |    |
| LVSDGQALPEMEIHLQNAEK | K           | G     | 95.00%                                                 |                          |             |       |                                                     | 40                                                  | M11: Oxidation | 780.3938  | 3      | 4.4 | 131           | 151       | No |     |     |     |    |
| YESSALPSGQLTSLSEYASR | R           | M     | 95.00%                                                 |                          |             |       |                                                     | 107                                                 |                | 1073.5260 | 2      | 6.4 | 470           | 489       | No |     |     |     |    |
| 233                  | IPI00030363 | ACAT1 | ACETYL-COA ACETYLTRANSFERASE, MITOCHONDRIAL PRECURSOR. |                          |             |       |                                                     | DGLTDVYNK                                           | K              | I         | 95.00% | 49  |               | 1024.5000 | 1  | 4.9 | 182 | 190 | No |
|                      |             |       |                                                        |                          |             |       |                                                     | DGLTDVYNK                                           | K              | I         | 95.00% | 51  |               | 512.7523  | 2  | 1.4 | 182 | 190 | No |
|                      |             |       |                                                        |                          |             |       |                                                     | EAYMGNVLQGGEGQAPTR                                  | K              | Q         | 95.00% | 116 | M4: Oxidation | 947.4491  | 2  | 7.2 | 88  | 105 | No |
|                      |             |       |                                                        |                          |             |       |                                                     | EAYMGNVLQGGEGQAPTR                                  | K              | Q         | 95.00% | 44  | M4: Oxidation | 631.9655  | 3  | 2.2 | 88  | 105 | No |
|                      |             |       |                                                        |                          |             |       |                                                     | EAYMGNVLQGGEGQAPTR                                  | K              | Q         | 95.00% | 106 |               | 939.4515  | 2  | 7.1 | 88  | 105 | No |
|                      |             |       |                                                        | EAYMGNVLQGGEGQAPTR       | K           | Q     | 95.00%                                              | 51                                                  |                | 626.6345  | 3      | 3.1 | 88            | 105       | No |     |     |     |    |
|                      |             |       |                                                        | EEVKEAYMGNVLQGGEGQAPT    | R           |       |                                                     |                                                     |                |           |        |     |               |           |    |     |     |     |    |
|                      |             |       |                                                        | EEVKEAYMGNVLQGGEGQAPT    | K           | Q     | 95.00%                                              | 68                                                  | M8: Oxidation  | 793.7146  | 3      | 1.3 | 84            | 105       | No |     |     |     |    |
|                      |             |       |                                                        | EEVKEAYMGNVLQGGEGQAPT    | R           |       |                                                     |                                                     |                |           |        |     |               |           |    |     |     |     |    |
|                      |             |       |                                                        | ENGTVTAANASTLNDGAAALVL   |             |       |                                                     |                                                     |                |           |        |     |               |           |    |     |     |     |    |
|                      |             |       |                                                        | MTADAAK                  | K           | R     | 95.00%                                              | 71                                                  | M23: Oxidation | 926.4673  | 3      | 8.5 | 274           | 302       | No |     |     |     |    |
|                      |             |       |                                                        | EVVIVSATR                | K           | T     | 95.00%                                              | 43                                                  |                | 973.5734  | 1      | 5.4 | 41            | 49        | No |     |     |     |    |
|                      |             |       |                                                        | EVVIVSATR                | K           | T     | 95.00%                                              | 74                                                  |                | 487.2895  | 2      | 3.1 | 41            | 49        | No |     |     |     |    |
|                      |             |       |                                                        | FGNEVIPVTIVK             | K           | G     | 95.00%                                              | 68                                                  |                | 701.9080  | 2      | 9.7 | 231           | 243       | No |     |     |     |    |
|                      |             |       |                                                        | GQPDVVVKEDEEYK           | K           | R     | 95.00%                                              | 87                                                  |                | 817.9016  | 2      | 2.3 | 244           | 257       | No |     |     |     |    |
|                      |             |       |                                                        | GQPDVVVKEDEEYKR          | K           | V     | 95.00%                                              | 77                                                  |                | 895.9568  | 2      | 7.4 | 244           | 258       | No |     |     |     |    |
|                      |             |       |                                                        | GQPDVVVKEDEEYKR          | K           | V     | 95.00%                                              | 67                                                  |                | 597.6381  | 3      | 3.3 | 244           | 258       | No |     |     |     |    |
|                      |             |       |                                                        | GSTPYGGVKLEDLVK          | R           | D     | 95.00%                                              | 48                                                  |                | 838.4734  | 2      | 6.9 | 166           | 181       | No |     |     |     |    |
|                      |             |       |                                                        | IVAFADAAVEPIDFPIAPVYAASM |             |       |                                                     |                                                     |                |           |        |     |               |           |    |     |     |     |    |
|                      |             |       |                                                        | VLK                      | R           | D     | 95.00%                                              | 89                                                  | M24: Oxidation | 945.5136  | 3      | 7.0 | 312           | 338       | No |     |     |     |    |
|                      |             |       |                                                        | IVAFADAAVEPIDFPIAPVYAASM |             |       |                                                     |                                                     |                |           |        |     |               |           |    |     |     |     |    |
|                      |             |       |                                                        | VLK                      | R           | D     | 95.00%                                              | 53                                                  | M24: Oxidation | 709.3882  | 4      | 8.5 | 312           | 338       | No |     |     |     |    |
|                      |             |       |                                                        | IVAFADAAVEPIDFPIAPVYAASM |             |       |                                                     |                                                     |                |           |        |     |               |           |    |     |     |     |    |
|                      |             |       |                                                        | VLK                      | R           | D     | 95.00%                                              | 71                                                  |                | 940.1846  | 3      | 9.9 | 312           | 338       | No |     |     |     |    |
|                      |             |       |                                                        | IVGHLTHALK               | R           | Q     | 95.00%                                              | 61                                                  |                | 544.8383  | 2      | 9.5 | 394           | 403       | No |     |     |     |    |
|                      |             |       |                                                        | LEDLVK                   | K           | D     | 95.00%                                              | 41                                                  |                | 829.5062  | 1      | 3.0 | 175           | 181       | No |     |     |     |    |
|                      |             |       |                                                        | LEDLVK                   | K           | D     | 95.00%                                              | 42                                                  |                | 415.2560  | 2      | 0.7 | 175           | 181       | No |     |     |     |    |
|                      |             |       |                                                        | LEDLVKDGLTDVYNK          | K           | I     | 95.00%                                              | 97                                                  |                | 918.0016  | 2      | 8.2 | 175           | 190       | No |     |     |     |    |
|                      |             |       |                                                        | LEDLVKDGLTDVYNK          | K           | I     | 95.00%                                              | 62                                                  |                | 612.3361  | 3      | 6.7 | 175           | 190       | No |     |     |     |    |
|                      |             |       |                                                        | LGSIAIQGAIEK             | K           | A     | 95.00%                                              | 51                                                  |                | 1199.7100 | 1      | 8.3 | 67            | 78        | No |     |     |     |    |
|                      |             |       |                                                        | LGSIAIQGAIEK             | K           | A     | 95.00%                                              | 89                                                  |                | 600.3565  | 2      | 4.2 | 67            | 78        | No |     |     |     |    |
|                      |             |       |                                                        | LNVTPLAR                 | R           | I     | 95.00%                                              | 42                                                  |                | 442.2726  | 2      | 1.0 | 304           | 311       | No |     |     |     |    |
|                      |             |       |                                                        | MLEIDPQK                 | K           | V     | 95.00%                                              | 37                                                  | M1: Oxidation  | 989.5072  | 1      | 9.3 | 366           | 373       | No |     |     |     |    |

|                         |                          |         |                                                                                                                                         |                         |                                                                 |          |                                                                                                                                                                                                                                                                         |                   |                                                     |           |        |     |                                  |          |    |     |     |     |    |
|-------------------------|--------------------------|---------|-----------------------------------------------------------------------------------------------------------------------------------------|-------------------------|-----------------------------------------------------------------|----------|-------------------------------------------------------------------------------------------------------------------------------------------------------------------------------------------------------------------------------------------------------------------------|-------------------|-----------------------------------------------------|-----------|--------|-----|----------------------------------|----------|----|-----|-----|-----|----|
| 234                     | IPI00030405              | HSPB3   | HEAT-SHOCK PROTEIN BETA-3.                                                                                                              | MLEIDPQKVNINGGAVSLGHPIG | K                                                               | I        | 95.00%                                                                                                                                                                                                                                                                  | 54                | M1: Oxidation,<br>M24: Oxidation                    | 965.1663  | 3      | 5.9 | 366                              | 393      | No |     |     |     |    |
|                         |                          |         |                                                                                                                                         | MSGAR                   | K                                                               | I        | 95.00%                                                                                                                                                                                                                                                                  | 56                | M1: Oxidation,<br>M24: Oxidation                    | 724.1282  | 4      | 8.0 | 366                              | 393      | No |     |     |     |    |
|                         |                          |         |                                                                                                                                         | MLEIDPQKVNINGGAVSLGHPIG | R                                                               | S        | 95.00%                                                                                                                                                                                                                                                                  | 123               |                                                     | 772.8562  | 2      | 4.1 | 209                              | 221      | No |     |     |     |    |
|                         |                          |         |                                                                                                                                         | MSGAR                   | R                                                               | I        | 95.00%                                                                                                                                                                                                                                                                  | 37                |                                                     | 520.3253  | 2      | 4.8 | 303                              | 311      | No |     |     |     |    |
|                         |                          |         |                                                                                                                                         | NEQDAYAINSYTR           | R                                                               | L        | 95.00%                                                                                                                                                                                                                                                                  | 131               |                                                     | 851.4998  | 2      | 7.2 | 50                               | 66       | No |     |     |     |    |
|                         |                          |         |                                                                                                                                         | RLNVTPLAR               | R                                                               | L        | 95.00%                                                                                                                                                                                                                                                                  | 88                |                                                     | 568.0012  | 3      | 5.0 | 50                               | 66       | No |     |     |     |    |
|                         |                          |         |                                                                                                                                         | TPIGSFLGSLSLLPATK       | R                                                               | L        | 95.00%                                                                                                                                                                                                                                                                  | 88                |                                                     | 568.0012  | 3      | 5.0 | 50                               | 66       | No |     |     |     |    |
|                         |                          |         |                                                                                                                                         | TPIGSFLGSLSLLPATK       | R                                                               | L        | 95.00%                                                                                                                                                                                                                                                                  | 88                |                                                     | 568.0012  | 3      | 5.0 | 50                               | 66       | No |     |     |     |    |
|                         |                          |         |                                                                                                                                         | TPIGSFLGSLSLLPATKLGSAIQ | R                                                               | A        | 95.00%                                                                                                                                                                                                                                                                  | 28                |                                                     | 961.5647  | 3      | 6.2 | 50                               | 78       | No |     |     |     |    |
|                         |                          |         |                                                                                                                                         | GAIEK                   | R                                                               | A        | 95.00%                                                                                                                                                                                                                                                                  | 28                |                                                     | 961.5647  | 3      | 6.2 | 50                               | 78       | No |     |     |     |    |
|                         |                          |         |                                                                                                                                         | VNINGGAVSLGHPIGMSGAR    | K                                                               | I        | 95.00%                                                                                                                                                                                                                                                                  | 84                | M16: Oxidation                                      | 962.0015  | 2      | 4.1 | 374                              | 393      | No |     |     |     |    |
|                         |                          |         |                                                                                                                                         | VNINGGAVSLGHPIGMSGAR    | K                                                               | I        | 95.00%                                                                                                                                                                                                                                                                  | 49                | M16: Oxidation                                      | 641.6728  | 3      | 8.2 | 374                              | 393      | No |     |     |     |    |
|                         |                          |         |                                                                                                                                         | AAQSPVDSAAETPPR         | R                                                               | E        | 95.00%                                                                                                                                                                                                                                                                  | 50                |                                                     | 797.4003  | 2      | 3.3 | 50                               | 65       | No |     |     |     |    |
|                         |                          |         |                                                                                                                                         | HLIEIPVR                | R                                                               | Y        | 95.00%                                                                                                                                                                                                                                                                  | 31                |                                                     | 488.8049  | 2      | 7.6 | 8                                | 15       | No |     |     |     |    |
|                         |                          |         |                                                                                                                                         | 235                     | IPI00030702; IPI00607898; IPI00792971; IPI00795359; IPI00795821 | IDH3A    | ISOFORM 1 OF ISOCITRATE DEHYDROGENASE [NAD] SUBUNIT ALPHA, MITOCHONDRIAL PRECURSOR.; ISOFORM 2 OF ISOCITRATE DEHYDROGENASE [NAD] SUBUNIT ALPHA, MITOCHONDRIAL PRECURSOR.; ISOCITRATE DEHYDROGENASE 3 (NAD+) ALPHA VARIANT (FRAGMENT).; 28 KDA PROTEIN.; 23 KDA PROTEIN. | DMANPTALLLSAVMMLR | K                                                   | H         | 95.00% | 57  | M2: Oxidation,<br>M14: Oxidation | 626.9926 | 3  | 6.8 | 300 | 316 | No |
| DMANPTALLLSAVMMLR       | K                        | H       | 95.00%                                                                                                                                  |                         |                                                                 |          |                                                                                                                                                                                                                                                                         | 68                | M2: Oxidation,<br>M14: Oxidation                    | 947.9850  | 2      | 9.5 | 300                              | 316      | No |     |     |     |    |
| DMANPTALLLSAVMMLR       | K                        | H       | 95.00%                                                                                                                                  |                         |                                                                 |          |                                                                                                                                                                                                                                                                         | 78                | M2: Oxidation,<br>M14: Oxidation                    | 632.3248  | 3      | 7.7 | 300                              | 316      | No |     |     |     |    |
| DMANPTALLLSAVMMLR       | K                        | H       | 95.00%                                                                                                                                  |                         |                                                                 |          |                                                                                                                                                                                                                                                                         | 99                | M2: Oxidation,<br>M14: Oxidation                    | 947.9850  | 2      | 9.5 | 300                              | 316      | No |     |     |     |    |
| DMANPTALLLSAVMMLR       | K                        | H       | 95.00%                                                                                                                                  |                         |                                                                 |          |                                                                                                                                                                                                                                                                         | 86                | M15: Oxidation,<br>M2: Oxidation,<br>M14: Oxidation | 632.3235  | 3      | 5.7 | 300                              | 316      | No |     |     |     |    |
| ENTEGEYSGIEHVIVDGVVQSIK | R                        | L       | 95.00%                                                                                                                                  |                         |                                                                 |          |                                                                                                                                                                                                                                                                         | 97                |                                                     | 1251.6290 | 2      | 5.9 | 147                              | 169      | No |     |     |     |    |
| ENTEGEYSGIEHVIVDGVVQSIK | R                        | L       | 95.00%                                                                                                                                  |                         |                                                                 |          |                                                                                                                                                                                                                                                                         | 63                |                                                     | 834.7587  | 3      | 9.8 | 147                              | 169      | No |     |     |     |    |
| IAEFAFEYAR              | R                        | N       | 95.00%                                                                                                                                  |                         |                                                                 |          |                                                                                                                                                                                                                                                                         | 81                |                                                     | 608.8056  | 2      | 2.6 | 179                              | 188      | No |     |     |     |    |
| TPIAAGHPSMNLRLR         | K                        | K       | 95.00%                                                                                                                                  |                         |                                                                 |          |                                                                                                                                                                                                                                                                         | 50                | M10: Oxidation                                      | 803.9474  | 2      | 8.1 | 101                              | 115      | No |     |     |     |    |
| TPIAAGHPSMNLRLR         | K                        | K       | 95.00%                                                                                                                                  |                         |                                                                 |          |                                                                                                                                                                                                                                                                         | 40                | M10: Oxidation                                      | 536.2982  | 3      | 3.0 | 101                              | 115      | No |     |     |     |    |
| TPYTDNIVTIR             | K                        | E       | 95.00%                                                                                                                                  |                         |                                                                 |          |                                                                                                                                                                                                                                                                         | 88                |                                                     | 696.3827  | 2      | 2.8 | 135                              | 146      | No |     |     |     |    |
| 236                     | IPI00030828; IPI00607861 | H6PD    | 90 KDA PROTEIN.; GDH/6PGL ENDOPLASMIC BIFUNCTIONAL PROTEIN PRECURSOR.                                                                   |                         |                                                                 |          |                                                                                                                                                                                                                                                                         | GSAVVGQYQSYSEQVR  | R                                                   | R         | 95.00% | 108 |                                  | 879.4323 | 2  | 6.3 | 317 | 332 | No |
|                         |                          |         |                                                                                                                                         |                         |                                                                 |          |                                                                                                                                                                                                                                                                         | LANDIEATAVR       | K                                                   | A         | 95.00% | 61  |                                  | 586.8215 | 2  | 6.5 | 578 | 588 | No |
|                         |                          |         |                                                                                                                                         |                         |                                                                 |          |                                                                                                                                                                                                                                                                         | MSLSPLINR         | R                                                   | A         | 95.00% | 49  | M1: Oxidation                    | 580.3337 | 2  | 7.4 | 740 | 749 | No |
| 237                     | IPI00030986; IPI00220297 | KBTBD10 | ISOFORM LONG OF KELCH REPEAT AND BTB DOMAIN-CONTAINING PROTEIN 10.; ISOFORM SHORT OF KELCH REPEAT AND BTB DOMAIN-CONTAINING PROTEIN 10. |                         |                                                                 |          |                                                                                                                                                                                                                                                                         | EFAPTEVNDIWK      | K                                                   | Y         | 95.00% | 73  |                                  | 724.8621 | 2  | 6.9 | 559 | 570 | No |
|                         |                          |         |                                                                                                                                         | EVVLDNVDPAILDLIIK       | K                                                               | Y        | 95.00%                                                                                                                                                                                                                                                                  | 112               |                                                     | 940.0509  | 2      | 7.7 | 73                               | 89       | No |     |     |     |    |
|                         |                          |         |                                                                                                                                         | EVVLDNVDPAILDLIIK       | K                                                               | Y        | 95.00%                                                                                                                                                                                                                                                                  | 88                |                                                     | 627.0357  | 3      | 6.3 | 73                               | 89       | No |     |     |     |    |
|                         |                          |         |                                                                                                                                         | EYFLSEIDEAK             | R                                                               | K        | 95.00%                                                                                                                                                                                                                                                                  | 91                |                                                     | 672.3248  | 2      | 3.4 | 60                               | 70       | No |     |     |     |    |
|                         |                          |         |                                                                                                                                         | LYQSTLLQDGLK            | R                                                               | D        | 95.00%                                                                                                                                                                                                                                                                  | 86                |                                                     | 689.8868  | 2      | 5.4 | 13                               | 24       | No |     |     |     |    |
|                         |                          |         |                                                                                                                                         | LYQSTLLQDGLKDLLDEK      | R                                                               | K        | 95.00%                                                                                                                                                                                                                                                                  | 102               |                                                     | 1046.5710 | 2      | 7.5 | 13                               | 30       | No |     |     |     |    |
|                         |                          |         |                                                                                                                                         | LYQSTLLQDGLKDLLDEK      | R                                                               | K        | 95.00%                                                                                                                                                                                                                                                                  | 51                |                                                     | 698.0478  | 3      | 4.7 | 13                               | 30       | No |     |     |     |    |
|                         |                          |         |                                                                                                                                         | LYQSTLLQDGLKDLLDEKK     | R                                                               | F        | 95.00%                                                                                                                                                                                                                                                                  | 45                |                                                     | 740.7468  | 3      | 5.3 | 13                               | 31       | No |     |     |     |    |
|                         |                          |         |                                                                                                                                         | LYQSTLLQDGLKDLLDEKK     | R                                                               | F        | 95.00%                                                                                                                                                                                                                                                                  | 28                |                                                     | 555.8124  | 4      | 5.9 | 13                               | 31       | No |     |     |     |    |
|                         |                          |         |                                                                                                                                         | TGAGEVNGDVGDEDLLPGYLND  |                                                                 |          |                                                                                                                                                                                                                                                                         |                   |                                                     |           |        |     |                                  |          |    |     |     |     |    |
|                         |                          |         |                                                                                                                                         | IPR                     | K                                                               | H        | 95.00%                                                                                                                                                                                                                                                                  | 33                |                                                     | 862.7568  | 3      | 8.5 | 273                              | 297      | No |     |     |     |    |
|                         |                          |         |                                                                                                                                         | VFIFNPK                 | R                                                               | K        | 95.00%                                                                                                                                                                                                                                                                  | 29                |                                                     | 432.7563  | 2      | 7.3 | 465                              | 471      | No |     |     |     |    |
|                         |                          |         |                                                                                                                                         | VYGHNVISHK              | K                                                               | G        | 95.00%                                                                                                                                                                                                                                                                  | 34                |                                                     | 577.3135  | 2      | 6.5 | 437                              | 446      | No |     |     |     |    |
|                         |                          |         |                                                                                                                                         | WDVMTFEPQER             | K                                                               | S        | 95.00%                                                                                                                                                                                                                                                                  | 61                | M4: Oxidation                                       | 727.3299  | 2      | 6.6 | 522                              | 532      | No |     |     |     |    |
|                         |                          |         |                                                                                                                                         | YFKDHVEKDDIIK           | K                                                               | S        | 95.00%                                                                                                                                                                                                                                                                  | 36                |                                                     | 825.4362  | 2      | 6.2 | 231                              | 243      | No |     |     |     |    |
| 238                     | IPI00031107; IPI00414384 | HSDL2   | HSDL2 PROTEIN.; HYDROXYSTEROID DEHYDROGENASE-LIKE PROTEIN.                                                                              | DGANIVIAAK              | K                                                               | T        | 95.00%                                                                                                                                                                                                                                                                  | 31                |                                                     | 971.5601  | 1      | 7.7 | 33                               | 42       | No |     |     |     |    |
|                         |                          |         |                                                                                                                                         | DGANIVIAAK              | K                                                               | T        | 95.00%                                                                                                                                                                                                                                                                  | 67                |                                                     | 486.2815  | 2      | 2.6 | 33                               | 42       | No |     |     |     |    |
|                         |                          |         |                                                                                                                                         | GGNVGYGEPDQADVMSMTT     |                                                                 |          |                                                                                                                                                                                                                                                                         |                   |                                                     |           |        |     |                                  |          |    |     |     |     |    |
|                         |                          |         |                                                                                                                                         | DDFVK                   | K                                                               | M        | 95.00%                                                                                                                                                                                                                                                                  | 57                | M17: Oxidation,<br>M19: Oxidation                   | 917.7344  | 3      | 4.0 | 353                              | 378      | No |     |     |     |    |
|                         |                          |         |                                                                                                                                         | KVDIIADAAYSIFQKPK       | R                                                               | S        | 95.00%                                                                                                                                                                                                                                                                  | 58                |                                                     | 636.3653  | 3      | 8.3 | 220                              | 236      | No |     |     |     |    |
| KVDIIADAAYSIFQKPK       | R                        | S       | 95.00%                                                                                                                                  | 36                      |                                                                 | 477.5236 | 4                                                                                                                                                                                                                                                                       | 3.5               | 220                                                 | 236       | No     |     |                                  |          |    |     |     |     |    |

|     |             |       |                                                              |                       |   |   |        |     |                              |  |           |   |     |     |     |     |
|-----|-------------|-------|--------------------------------------------------------------|-----------------------|---|---|--------|-----|------------------------------|--|-----------|---|-----|-----|-----|-----|
|     |             |       |                                                              | KVESTGAVPEFKEEK       | K | L | 95.00% | 39  |                              |  | 559.9636  | 3 | 3.1 | 284 | 298 | No  |
|     |             |       |                                                              | LDLMNVNTR             | R | G | 95.00% | 54  | M4: Oxidation, M5: Oxidation |  | 619.7998  | 2 | 3.5 | 118 | 127 | No  |
|     |             |       |                                                              | LLGTIYTAEEIEAVGGK     | K | A | 95.00% | 134 |                              |  | 918.0021  | 2 | 8.7 | 50  | 67  | No  |
|     |             |       |                                                              | LLGTIYTAEEIEAVGGK     | K | A | 95.00% | 65  |                              |  | 612.3376  | 3 | 9.0 | 50  | 67  | No  |
|     |             |       |                                                              | SGAVEETFR             | R | I | 95.00% | 49  |                              |  | 498.2470  | 2 | 6.4 | 307 | 315 | No  |
|     |             |       |                                                              | VAHILNISPLNLPVWFK     | K | Q | 95.00% | 42  |                              |  | 724.7547  | 3 | 7.0 | 145 | 163 | No  |
|     |             |       |                                                              | VDIADAAYSIFQKPK       | K | S | 95.00% | 62  |                              |  | 889.9972  | 2 | 9.7 | 221 | 236 | No  |
|     |             |       |                                                              | VDIADAAYSIFQKPK       | K | S | 95.00% | 29  |                              |  | 593.6661  | 3 | 7.5 | 221 | 236 | No  |
|     |             |       |                                                              | VESTGAVPEFKEEK        | K | L | 95.00% | 50  |                              |  | 775.3945  | 2 | 3.9 | 285 | 298 | No  |
| 239 | IPI00031169 | RAB2A | RAS-RELATED PROTEIN RAB-2A.                                  | FQPVHDLTIGVEFGAR      | R | M | 95.00% | 43  |                              |  | 595.9855  | 3 | 6.6 | 31  | 46  | No  |
|     |             |       |                                                              | GAAGALLVYDITR         | R | R | 95.00% | 41  |                              |  | 660.3742  | 2 | 6.0 | 78  | 90  | No  |
|     |             |       |                                                              | TASNVEEAFINTAK        | K | E | 95.00% | 95  |                              |  | 747.8809  | 2 | 6.6 | 152 | 165 | No  |
|     |             |       |                                                              | YIIIGDTGVGK           | K | S | 95.00% | 36  |                              |  | 568.3267  | 2 | 8.0 | 9   | 19  | No  |
| 240 | IPI00031397 | ACSL3 | LONG-CHAIN-FATTY-ACID--COA LIGASE 3.                         | GEILIGGQSVMGYK        | R | N | 95.00% | 76  | M12: Oxidation               |  | 866.4407  | 2 | 6.1 | 526 | 541 | No  |
|     |             |       |                                                              | GIIVHTMAAVEALGAK      | K | A | 95.00% | 41  | M7: Oxidation                |  | 798.9466  | 2 | 4.2 | 250 | 265 | No  |
|     |             |       |                                                              | IGYSSPQTADQSSK        | R | I | 95.00% | 88  |                              |  | 791.3944  | 2 | 3.1 | 349 | 363 | No  |
|     |             |       |                                                              | LKDIVSLVPR            | K | L | 95.00% | 42  |                              |  | 570.3647  | 2 | 5.5 | 221 | 230 | No  |
|     |             |       |                                                              | LSPEPWPETGLVTDFAK     | R | L | 95.00% | 71  |                              |  | 994.5131  | 2 | 8.3 | 682 | 699 | No  |
|     |             |       |                                                              | VLSEAAIASASLEK        | K | F | 95.00% | 107 |                              |  | 659.3702  | 2 | 4.6 | 661 | 673 | No  |
| 241 | IPI00031461 | GD12  | RAB GDP DISSOCIATION INHIBITOR BETA.                         | DLGTESQIFISR          | K | T | 95.00% | 70  |                              |  | 683.3589  | 2 | 6.2 | 391 | 402 | No  |
|     |             |       |                                                              | EIRPALELLEPIEQK       | K | F | 95.00% | 29  |                              |  | 593.3450  | 3 | 7.2 | 365 | 379 | No  |
|     |             |       |                                                              | FDLGQDVIDFTGHALALYR   | K | T | 95.00% | 64  |                              |  | 717.7064  | 3 | 7.4 | 175 | 193 | Yes |
|     |             |       |                                                              | FKIPGSPPEMGR          | R | G | 95.00% | 33  | M11: Oxidation               |  | 709.8660  | 2 | 9.7 | 56  | 68  | No  |
|     |             |       |                                                              | FLVYVANFDEK DPR       | K | T | 95.00% | 44  |                              |  | 571.6295  | 3 | 4.6 | 143 | 156 | No  |
|     |             |       |                                                              | FVSISDLLVPK           | K | D | 95.00% | 61  |                              |  | 609.3646  | 2 | 5.5 | 380 | 390 | No  |
|     |             |       |                                                              | IPGSPPEMGR            | K | G | 95.00% | 40  | M9: Oxidation                |  | 572.2790  | 2 | 2.9 | 58  | 68  | No  |
|     |             |       |                                                              | KFDLGQDVIDFTGHALALYR  | K | T | 95.00% | 81  |                              |  | 760.4036  | 3 | 5.6 | 174 | 193 | No  |
|     |             |       |                                                              | KFDLGQDVIDFTGHALALYR  | K | T | 95.00% | 53  |                              |  | 570.5549  | 4 | 6.0 | 174 | 193 | No  |
|     |             |       |                                                              | MLLYTEVTR             | K | Y | 95.00% | 37  | M1: Oxidation                |  | 571.3029  | 2 | 4.6 | 90  | 98  | Yes |
|     |             |       |                                                              | MTGSEDFEEMKR          | R | K | 95.00% | 44  | M11: Oxidation               |  | 819.8509  | 2 | 9.8 | 424 | 436 | No  |
|     |             |       |                                                              | NPYYGGESASITLEDLYKR   | R | F | 95.00% | 56  |                              |  | 758.3799  | 3 | 6.6 | 36  | 55  | No  |
|     |             |       |                                                              | PALELLEPIEQK          | R | F | 95.00% | 60  |                              |  | 690.3978  | 2 | 6.4 | 368 | 379 | No  |
|     |             |       |                                                              | SPYLYPLYGLGELPQGFAR   | K | L | 95.00% | 116 |                              |  | 1071.0660 | 2 | 7.8 | 222 | 240 | Yes |
|     |             |       |                                                              | SPYLYPLYGLGELPQGFAR   | K | L | 95.00% | 72  |                              |  | 714.3803  | 3 | 8.3 | 222 | 240 | Yes |
|     |             |       |                                                              | VPSTEAEALASSLMGLFEK   | K | R | 95.00% | 47  | M14: Oxidation               |  | 998.5020  | 2 | 0.6 | 119 | 137 | No  |
|     |             |       |                                                              | VPSTEAEALASSLMGLFEK   | K | R | 95.00% | 52  | M14: Oxidation               |  | 666.0092  | 3 | 8.6 | 119 | 137 | No  |
|     |             |       |                                                              | YIAIVTTVETK           | K | E | 95.00% | 32  |                              |  | 662.8764  | 2 | 6.4 | 349 | 360 | No  |
| 242 | IPI00031522 | HADHA | TRIFUNCTIONAL ENZYME SUBUNIT ALPHA, MITOCHONDRIAL PRECURSOR. | ADMVIEAVFEDLSLK       | K | H | 95.00% | 101 | M3: Oxidation                |  | 848.4337  | 2 | 4.7 | 441 | 455 | No  |
|     |             |       |                                                              | ADMVIEAVFEDLSLK       | K | H | 95.00% | 63  | M3: Oxidation                |  | 565.9576  | 3 | 3.3 | 441 | 455 | No  |
|     |             |       |                                                              | ADMVIEAVFEDLSLK       | K | H | 95.00% | 90  |                              |  | 840.4381  | 2 | 6.9 | 441 | 455 | No  |
|     |             |       |                                                              | ALTSFER               | K | D | 95.00% | 33  |                              |  | 412.2203  | 2 | 1.8 | 416 | 422 | No  |
|     |             |       |                                                              | DATLTALDR             | K | G | 95.00% | 53  |                              |  | 975.5149  | 1 | 3.7 | 391 | 399 | No  |
|     |             |       |                                                              | DATLTALDR             | K | G | 95.00% | 76  |                              |  | 488.2610  | 2 | 2.9 | 391 | 399 | No  |
|     |             |       |                                                              | DGPGFYTTR             | K | C | 95.00% | 36  |                              |  | 1013.4780 | 1 | 8.3 | 541 | 549 | No  |
|     |             |       |                                                              | DGPGFYTTR             | K | C | 95.00% | 57  |                              |  | 507.2406  | 2 | 4.0 | 541 | 549 | No  |
|     |             |       |                                                              | DLNSDMDSILASLK        | K | L | 95.00% | 113 | M6: Oxidation                |  | 769.3784  | 2 | 4.4 | 647 | 660 | No  |
|     |             |       |                                                              | DLNSDMDSILASLK        | K | L | 95.00% | 57  | M6: Oxidation                |  | 513.2557  | 3 | 6.1 | 647 | 660 | No  |
|     |             |       |                                                              | DLNSDMDSILASLK        | K | L | 95.00% | 105 |                              |  | 761.3812  | 2 | 4.8 | 647 | 660 | No  |
|     |             |       |                                                              | DLNSDMDSILASLK        | K | L | 95.00% | 59  |                              |  | 507.9231  | 3 | 4.2 | 647 | 660 | No  |
|     |             |       |                                                              | DSIFSNLTQQLDYQGFEK    | R | A | 95.00% | 121 |                              |  | 1031.4990 | 2 | 6.7 | 423 | 440 | No  |
|     |             |       |                                                              | DSIFSNLTQQLDYQGFEK    | R | A | 95.00% | 84  |                              |  | 688.0021  | 3 | 6.6 | 423 | 440 | No  |
|     |             |       |                                                              | DTSASAVAVGLK          | K | Q | 95.00% | 60  |                              |  | 1118.6160 | 1 | 8.8 | 520 | 531 | No  |
|     |             |       |                                                              | DTSASAVAVGLK          | K | Q | 95.00% | 82  |                              |  | 559.8080  | 2 | 2.2 | 520 | 531 | No  |
|     |             |       |                                                              | ELHSEFSEVMNEIWASDQIR  | K | S | 95.00% | 63  | M10: Oxidation               |  | 812.7144  | 3 | 5.7 | 67  | 86  | No  |
|     |             |       |                                                              | FGELVMTK              | K | E | 95.00% | 49  | M6: Oxidation                |  | 940.4883  | 1 | 7.2 | 327 | 334 | No  |
|     |             |       |                                                              | FGELVMTK              | K | E | 95.00% | 52  | M6: Oxidation                |  | 470.7458  | 2 | 2.3 | 327 | 334 | No  |
|     |             |       |                                                              | FGGGNPELLTQMVSQ       | R | G | 95.00% | 98  | M12: Oxidation               |  | 797.4069  | 2 | 7.0 | 611 | 625 | No  |
|     |             |       |                                                              | FGGGNPELLTQMVSQ       | R | G | 95.00% | 50  | M12: Oxidation               |  | 531.9395  | 3 | 5.1 | 611 | 625 | No  |
|     |             |       |                                                              | FGGGNPELLTQMVSQ       | R | G | 95.00% | 86  |                              |  | 789.4082  | 2 | 5.5 | 611 | 625 | No  |
|     |             |       |                                                              | FVDLYGAQK             | R | I | 95.00% | 51  |                              |  | 1040.5510 | 1 | 8.9 | 720 | 728 | No  |
|     |             |       |                                                              | FVDLYGAQK             | R | I | 95.00% | 52  |                              |  | 520.7754  | 2 | 1.1 | 720 | 728 | No  |
|     |             |       |                                                              | GFYIYQEGVK            | K | R | 95.00% | 48  |                              |  | 1203.6110 | 1 | 4.6 | 635 | 644 | No  |
|     |             |       |                                                              | GFYIYQEGVK            | K | R | 95.00% | 69  |                              |  | 602.3083  | 2 | 3.0 | 635 | 644 | No  |
|     |             |       |                                                              | HLAILGAGLMGAGIAQVSVDK | K | G | 95.00% | 96  | M10: Oxidation               |  | 1019.0670 | 2 | 4.7 | 363 | 383 | No  |
|     |             |       |                                                              | HLAILGAGLMGAGIAQVSVDK | K | G | 95.00% | 60  | M10: Oxidation               |  | 679.7164  | 3 | 8.2 | 363 | 383 | No  |
|     |             |       |                                                              | ILQEGVDPK             | R | K | 95.00% | 30  |                              |  | 998.5596  | 1 | 7.2 | 561 | 569 | No  |
|     |             |       |                                                              | ILQEGVDPK             | R | K | 95.00% | 56  |                              |  | 499.7807  | 2 | 1.2 | 561 | 569 | No  |



|     |                                                                                           |               |                                                                              |                                                                                                                                                                                                  |   |   |        |     |                |           |   |     |     |     |     |
|-----|-------------------------------------------------------------------------------------------|---------------|------------------------------------------------------------------------------|--------------------------------------------------------------------------------------------------------------------------------------------------------------------------------------------------|---|---|--------|-----|----------------|-----------|---|-----|-----|-----|-----|
|     |                                                                                           |               |                                                                              | FAIQDISVEETSAK                                                                                                                                                                                   | R | E | 95.00% | 89  |                | 769.3964  | 2 | 6.4 | 148 | 161 | Yes |
|     |                                                                                           |               |                                                                              | GLSQEQLNEFR                                                                                                                                                                                      | K | A | 95.00% | 46  |                | 660.8351  | 2 | 5.6 | 756 | 766 | No  |
|     |                                                                                           |               |                                                                              | KAGTQIENIEEDFR                                                                                                                                                                                   | R | N | 95.00% | 52  |                | 825.4128  | 2 | 2.5 | 61  | 74  | Yes |
|     |                                                                                           |               |                                                                              | KAGTQIENIEEDFRNLK                                                                                                                                                                                | R | L | 95.00% | 38  |                | 688.0298  | 3 | 8.3 | 61  | 78  | Yes |
|     |                                                                                           |               |                                                                              | LAAGLAGSLEEQMAGLR                                                                                                                                                                                | R | Q | 95.00% | 106 | M13: Oxidation | 851.9486  | 2 | 5.5 | 670 | 686 | No  |
|     |                                                                                           |               |                                                                              | LASELLEWIR                                                                                                                                                                                       | K | R | 95.00% | 80  |                | 615.3546  | 2 | 9.7 | 296 | 305 | No  |
|     |                                                                                           |               |                                                                              | LMLLLEVISGER                                                                                                                                                                                     | K | L | 95.00% | 84  | M2: Oxidation  | 694.9011  | 2 | 8.5 | 79  | 90  | Yes |
|     |                                                                                           |               |                                                                              | LRKDDPIGNLNTAFEVAEK                                                                                                                                                                              | K | Y | 95.00% | 40  |                | 710.7184  | 3 | 9.4 | 210 | 228 | No  |
|     |                                                                                           |               |                                                                              | LVSIGAEIIVDGNLK                                                                                                                                                                                  | K | M | 95.00% | 64  |                | 778.9373  | 2 | 8.3 | 121 | 135 | No  |
|     |                                                                                           |               |                                                                              | MLDAEDIVNTPKPEDEK                                                                                                                                                                                | K | A | 95.00% | 38  | M1: Oxidation  | 610.9661  | 3 | 1.5 | 235 | 250 | No  |
|     |                                                                                           |               |                                                                              | TINEVENQVLTR                                                                                                                                                                                     | R | D | 95.00% | 61  |                | 708.3817  | 2 | 4.3 | 741 | 752 | No  |
| 246 | IPI00032195                                                                               | HSPB2         | HEAT-SHOCK PROTEIN BETA-2.                                                   | AALSHDGILNLEAPR                                                                                                                                                                                  | R | G | 95.00% | 40  |                | 526.2911  | 3 | 8.1 | 259 | 273 | No  |
|     |                                                                                           |               |                                                                              | FGEGLLPEEILTPTLYHGYYVRP                                                                                                                                                                          |   |   |        |     |                |           |   |     |     |     |     |
|     |                                                                                           |               |                                                                              | R                                                                                                                                                                                                | R | A | 95.00% | 33  |                | 705.8809  | 4 | 9.9 | 154 | 177 | No  |
|     |                                                                                           |               |                                                                              | TVDNLLEVSAR                                                                                                                                                                                      | R | H | 95.00% | 57  |                | 608.8362  | 2 | 8.9 | 217 | 227 | No  |
|     |                                                                                           |               |                                                                              | TYVLPADVDPWR                                                                                                                                                                                     | R | V | 95.00% | 39  |                | 716.3744  | 2 | 9.5 | 245 | 256 | No  |
| 247 | IPI00032450; IPI00783617                                                                  | ASPH          | ASPARTATE BETA-HYDROXYLASE ISOFORM D.; ASPARTATE BETA-HYDROXYLASE ISOFORM E. | LGIYDADGGDFDVDDAK                                                                                                                                                                                | K | V | 95.00% | 92  |                | 950.9173  | 2 | 9.2 | 73  | 90  | No  |
|     |                                                                                           |               |                                                                              | VLEEGPSGVAK                                                                                                                                                                                      | K | R | 95.00% | 26  |                | 1069.6300 | 1 | 3.9 | 91  | 101 | No  |
|     |                                                                                           |               |                                                                              | VLEEGPSGVAK                                                                                                                                                                                      | K | R | 95.00% | 42  |                | 535.3195  | 2 | 4.9 | 91  | 101 | No  |
| 248 | IPI00032561                                                                               | CAB39         | CALCIUM-BINDING PROTEIN 39.                                                  | DVAQIFNNILR                                                                                                                                                                                      | K | R | 95.00% | 80  |                | 651.8668  | 2 | 6.6 | 97  | 107 | No  |
|     |                                                                                           |               |                                                                              | LIEFLSK                                                                                                                                                                                          | K | F | 95.00% | 38  |                | 425.2620  | 2 | 8.7 | 302 | 308 | No  |
|     |                                                                                           |               |                                                                              | LLGELLDR                                                                                                                                                                                         | K | H | 95.00% | 69  |                | 521.3223  | 2 | 5.4 | 232 | 240 | No  |
|     |                                                                                           |               |                                                                              | LLSAEFLEQHYDR                                                                                                                                                                                    | K | F | 95.00% | 47  |                | 810.9115  | 2 | 8.0 | 197 | 209 | No  |
|     |                                                                                           |               |                                                                              | LLSAEFLEQHYDR                                                                                                                                                                                    | K | F | 95.00% | 61  |                | 540.9422  | 3 | 5.3 | 197 | 209 | No  |
|     |                                                                                           |               |                                                                              | NIQFEAFHFVK                                                                                                                                                                                      | R | V | 95.00% | 56  |                | 690.3643  | 2 | 6.9 | 269 | 279 | No  |
|     |                                                                                           |               |                                                                              | TQPILDILLK                                                                                                                                                                                       | K | N | 95.00% | 30  |                | 577.3691  | 2 | 9.0 | 288 | 297 | No  |
| 249 | IPI00032826; IPI00168839                                                                  | FAM10A5; ST13 | HSC70-INTERACTING PROTEIN.; PROTEIN FAM10A5.                                 | AIDLFTDAIK                                                                                                                                                                                       | K | L | 95.00% | 63  |                | 553.8119  | 2 | 5.4 | 133 | 142 | No  |
|     |                                                                                           |               |                                                                              | AIEINPDSAQPYK                                                                                                                                                                                    | R | W | 95.00% | 67  |                | 723.3704  | 2 | 3.5 | 174 | 186 | No  |
|     |                                                                                           |               |                                                                              | LDYDEDAAMLK                                                                                                                                                                                      | K | E | 95.00% | 93  | M10: Oxidation | 693.8123  | 2 | 4.8 | 211 | 222 | No  |
|     |                                                                                           |               |                                                                              | QDPSVLHTEEMR                                                                                                                                                                                     | K | F | 95.00% | 41  | M11: Oxidation | 729.3459  | 2 | 9.8 | 18  | 29  | No  |
|     |                                                                                           |               |                                                                              | VAAIEALNDGELQK                                                                                                                                                                                   | K | A | 95.00% | 111 |                | 735.8984  | 2 | 5.7 | 119 | 132 | No  |
|     |                                                                                           |               |                                                                              | VAAIEALNDGELQK                                                                                                                                                                                   | K | A | 95.00% | 67  |                | 490.9343  | 3 | 4.6 | 119 | 132 | No  |
|     |                                                                                           |               |                                                                              | ISOFORM 1 OF ELECTRON TRANSFER FLAVOPROTEIN-UBIQUINONE OXIDOREDUCTASE, MITOCHONDRIAL PRECURSOR.; ISOFORM 2 OF ELECTRON TRANSFER FLAVOPROTEIN-UBIQUINONE OXIDOREDUCTASE, MITOCHONDRIAL PRECURSOR. |   |   |        |     |                |           |   |     |     |     |     |
| 250 | IPI00032875; IPI00455179                                                                  | ETFDH         |                                                                              | ALNEGGFQSIPK                                                                                                                                                                                     | R | L | 95.00% | 88  |                | 630.8357  | 2 | 3.6 | 365 | 376 | No  |
|     |                                                                                           |               |                                                                              | ELWVIDEK                                                                                                                                                                                         | K | N | 95.00% | 34  |                | 516.2775  | 2 | 5.4 | 277 | 284 | No  |
|     |                                                                                           |               |                                                                              | FAEEADVIVGAGPAGLSAAVR                                                                                                                                                                            | R | L | 95.00% | 111 |                | 1050.0690 | 2 | 7.8 | 65  | 86  | No  |
|     |                                                                                           |               |                                                                              | GAPLNTPTVEDR                                                                                                                                                                                     | K | F | 95.00% | 44  |                | 635.3275  | 2 | 2.3 | 135 | 146 | No  |
|     |                                                                                           |               |                                                                              | GIATNDVGIQK                                                                                                                                                                                      | K | D | 95.00% | 52  |                | 558.3084  | 2 | 2.4 | 213 | 223 | No  |
|     |                                                                                           |               |                                                                              | ITHTYTIYPR                                                                                                                                                                                       | R | D | 95.00% | 37  |                | 632.8398  | 2 | 2.1 | 42  | 51  | No  |
|     |                                                                                           |               |                                                                              | NLSIYDGPEQR                                                                                                                                                                                      | R | F | 95.00% | 56  |                | 646.3226  | 2 | 7.1 | 549 | 559 | No  |
|     |                                                                                           |               |                                                                              | SGILAAESIFNQLTSENLSQSK                                                                                                                                                                           | K | T | 95.00% | 95  |                | 750.7310  | 3 | 6.9 | 406 | 426 | No  |
|     |                                                                                           |               |                                                                              | TIGLHVTEYEDNLK                                                                                                                                                                                   | K | N | 95.00% | 94  |                | 816.4222  | 2 | 5.0 | 427 | 440 | No  |
|     |                                                                                           |               |                                                                              | TIGLHVTEYEDNLK                                                                                                                                                                                   | K | N | 95.00% | 39  |                | 544.6181  | 3 | 6.4 | 427 | 440 | No  |
| 251 | IPI00032959                                                                               | GPD1L         | GLYCEROL-3-PHOSPHATE DEHYDROGENASE 1-LIKE.                                   | ALGITLIK                                                                                                                                                                                         | K | G | 95.00% | 38  |                | 414.7852  | 2 | 7.9 | 115 | 122 | No  |
|     |                                                                                           |               |                                                                              | ELLQTPNFR                                                                                                                                                                                        | K | I | 95.00% | 30  |                | 559.3081  | 2 | 6.8 | 181 | 189 | No  |
|     |                                                                                           |               |                                                                              | KALGITLIK                                                                                                                                                                                        | K | G | 95.00% | 30  |                | 478.8323  | 2 | 6.0 | 114 | 122 | No  |
|     |                                                                                           |               |                                                                              | KLTDIINNDHENVK                                                                                                                                                                                   | R | Y | 95.00% | 75  |                | 826.9416  | 2 | 8.8 | 51  | 64  | No  |
|     |                                                                                           |               |                                                                              | KLTDIINNDHENVK                                                                                                                                                                                   | R | Y | 95.00% | 36  |                | 551.6292  | 3 | 6.6 | 51  | 64  | No  |
|     |                                                                                           |               |                                                                              | LISDIIR                                                                                                                                                                                          | K | E | 95.00% | 35  |                | 415.2644  | 2 | 7.4 | 133 | 139 | No  |
|     |                                                                                           |               |                                                                              | LQGPQTSAEVYR                                                                                                                                                                                     | K | I | 95.00% | 51  |                | 674.8524  | 2 | 8.0 | 299 | 310 | No  |
|     |                                                                                           |               |                                                                              | LTDIINNDHENVK                                                                                                                                                                                    | K | Y | 95.00% | 62  |                | 762.8935  | 2 | 8.6 | 52  | 64  | No  |
|     |                                                                                           |               |                                                                              | VMENGLLFLK                                                                                                                                                                                       | K | E | 95.00% | 31  | M2: Oxidation  | 533.7873  | 2 | 5.6 | 172 | 180 | No  |
|     |                                                                                           |               |                                                                              | ISOFORM 1 OF DYNAMIN-2.; DYNAMIN 2 ISOFORM 4.; ISOFORM 2 OF DYNAMIN-2.; 98 KDA PROTEIN.; DYNAMIN 2 ISOFORM 2.; 98 KDA PROTEIN.; 98 KDA PROTEIN.                                                  |   |   |        |     |                |           |   |     |     |     |     |
| 252 | IPI00033022; IPI00181352; IPI00218889; IPI00477431; IPI00514550; IPI00743573; IPI00794575 | DNM2          |                                                                              | GISPVPINLR                                                                                                                                                                                       | K | V | 95.00% | 37  |                | 533.3280  | 2 | 5.6 | 114 | 123 | No  |
|     |                                                                                           |               |                                                                              | GMEELIPLVNK                                                                                                                                                                                      | R | L | 95.00% | 48  | M2: Oxidation  | 629.8420  | 2 | 3.5 | 5   | 15  | No  |
|     |                                                                                           |               |                                                                              | VPVGDQPPDIEYQIK                                                                                                                                                                                  | K | D | 95.00% | 72  |                | 849.4485  | 2 | 8.1 | 143 | 157 | No  |
|     |                                                                                           |               |                                                                              | VYSPHVLNLTLDLPGITK                                                                                                                                                                               | R | V | 95.00% | 43  |                | 698.4109  | 3 | 7.6 | 124 | 142 | No  |

|     |                                                                 |              |                                                                                                                                                                                |                                                                                                                                                                                              |               |          |                                            |                    |                                               |           |          |     |      |          |     |     |     |     |     |
|-----|-----------------------------------------------------------------|--------------|--------------------------------------------------------------------------------------------------------------------------------------------------------------------------------|----------------------------------------------------------------------------------------------------------------------------------------------------------------------------------------------|---------------|----------|--------------------------------------------|--------------------|-----------------------------------------------|-----------|----------|-----|------|----------|-----|-----|-----|-----|-----|
| 253 | IPI00033036                                                     | METAP2       | METHIONINE AMINOPEPTIDASE 2.                                                                                                                                                   | GPSAAGEQEPDKESGASVDEVA                                                                                                                                                                       | K             | Q        | 95.00%                                     | 56                 |                                               | 762.6946  | 3        | 8.7 | 47   | 69       | No  |     |     |     |     |
|     |                                                                 |              |                                                                                                                                                                                | R                                                                                                                                                                                            | K             | L        | 95.00%                                     | 61                 |                                               | 577.3135  | 2        | 6.2 | 386  | 395      | No  |     |     |     |     |
|     |                                                                 |              |                                                                                                                                                                                | NFDVGHVPIR                                                                                                                                                                                   | K             | Q        | 95.00%                                     | 31                 |                                               | 626.0546  | 4        | 7.7 | 45   | 69       | No  |     |     |     |     |
| 254 | IPI00033494; IPI00220573; IPI00604523; IPI00719669              | MRCL3; MRLC2 | MYOSIN REGULATORY LIGHT CHAIN.; MYOSIN REGULATORY LIGHT CHAIN 2, NONSARCOMERIC.; MYOSIN REGULATORY LIGHT CHAIN MRCL3 VARIANT.; SIMILAR TO MYOSIN REGULATORY LIGHT CHAIN MRCL2. | EAFNMIDQNR                                                                                                                                                                                   | K             | D        | 95.00%                                     | 36                 | M5: Oxidation                                 | 627.2884  | 2        | 8.5 | 36   | 45       | Yes |     |     |     |     |
|     |                                                                 |              |                                                                                                                                                                                | GNFNYIEFTR                                                                                                                                                                                   | K             | I        | 95.00%                                     | 56                 |                                               | 630.8105  | 2        | 9.5 | 152  | 161      | No  |     |     |     |     |
|     |                                                                 |              |                                                                                                                                                                                | ISOFORM 5 OF DYNAMIN-1-LIKE PROTEIN.; ISOFORM 1 OF DYNAMIN-1-LIKE PROTEIN.; ISOFORM 3 OF DYNAMIN-1-LIKE PROTEIN.; ISOFORM 4 OF DYNAMIN-1-LIKE PROTEIN.; ISOFORM 2 OF DYNAMIN-1-LIKE PROTEIN. | ALQGASQIIAEIR | K        | E                                          | 95.00%             | 44                                            |           | 685.3979 | 2   | 5.5  | 693      | 705 | No  |     |     |     |
| 255 | IPI00037283; IPI00146935; IPI00235412; IPI00473085; IPI00555883 | DNM1L        |                                                                                                                                                                                | DTLQSELVGQLYK                                                                                                                                                                                | K             | S        | 95.00%                                     | 68                 |                                               | 747.4003  | 2        | 4.8 | 654  | 666      | No  |     |     |     |     |
|     |                                                                 |              |                                                                                                                                                                                | FISNPNSIILAVTAANTDMATSEA                                                                                                                                                                     | R             | I        | 95.00%                                     | 56                 | M19: Oxidation                                | 903.4680  | 3        | 2.4 | 173  | 198      | No  |     |     |     |     |
|     |                                                                 |              |                                                                                                                                                                                | LK                                                                                                                                                                                           | K             | K        | 95.00%                                     | 66                 |                                               | 778.9562  | 2        | 8.5 | 594  | 608      | No  |     |     |     |     |
|     |                                                                 |              |                                                                                                                                                                                | GHAVNLLDVPVVAR                                                                                                                                                                               | K             | V        | 95.00%                                     | 124                | M17: Oxidation                                | 1037.5720 | 2        | 4.7 | 134  | 152      | No  |     |     |     |     |
|     |                                                                 |              |                                                                                                                                                                                | IFSPNVNLTLDLPGMTK                                                                                                                                                                            | K             | V        | 95.00%                                     | 124                | M4: Oxidation, M11: Oxidation, M15: Oxidation | 936.4215  | 2        | 8.5 | 217  | 233      | No  |     |     |     |     |
|     |                                                                 |              |                                                                                                                                                                                | LDLMDAGTDAMDVLGR                                                                                                                                                                             | K             | S        | 95.00%                                     | 72                 |                                               | 470.8040  | 2        | 5.9 | 239  | 247      | No  |     |     |     |     |
|     |                                                                 |              |                                                                                                                                                                                | LGIIQVNR                                                                                                                                                                                     | K             | I        | 95.00%                                     | 55                 |                                               | 767.3665  | 3        | 6.7 | 100  | 117      | No  |     |     |     |     |
|     |                                                                 |              |                                                                                                                                                                                | LYTDFEIRQEIENETER                                                                                                                                                                            | R             | R        | 95.00%                                     | 50                 |                                               | 592.3489  | 3        | 7.3 | 61   | 75       | No  |     |     |     |     |
|     |                                                                 |              |                                                                                                                                                                                | RPLILQLVHVSQEDK                                                                                                                                                                              | K             | F        | 95.00%                                     | 47                 |                                               | 544.3442  | 2        | 7.1 | 330  | 339      | No  |     |     |     |     |
|     |                                                                 |              |                                                                                                                                                                                | SATLLQLITK                                                                                                                                                                                   | K             | R        | 95.00%                                     | 105                | M14: Oxidation                                | 969.9600  | 2        | 7.9 | 667  | 683      | No  |     |     |     |     |
|     |                                                                 |              |                                                                                                                                                                                | SSLLDDLLTESEDMAQR                                                                                                                                                                            | K             | D        | 95.00%                                     | 43                 |                                               | 523.7976  | 2        | 2.6 | 39   | 48       | No  |     |     |     |     |
|     |                                                                 |              |                                                                                                                                                                                | SSVLDESIVGR                                                                                                                                                                                  | K             | K        | 95.00%                                     | 42                 |                                               | 886.4529  | 2        | 6.4 | 257  | 271      | No  |     |     |     |     |
|     |                                                                 |              |                                                                                                                                                                                | SVTDSIRDEYAFLLQK                                                                                                                                                                             | K             | K        | 95.00%                                     | 38                 |                                               | 591.3030  | 3        | 3.7 | 257  | 271      | No  |     |     |     |     |
|     |                                                                 |              |                                                                                                                                                                                | SVTDSIRDEYAFLLQK                                                                                                                                                                             | R             | N        | 95.00%                                     | 121                |                                               | 1106.1270 | 2        | 9.6 | 377  | 397      | No  |     |     |     |     |
|     |                                                                 |              |                                                                                                                                                                                | 256                                                                                                                                                                                          | IPI00044608   | KIAA1881 | PLASMA MEMBRANE ASSOCIATED PROTEIN, S3-12. | AKDAVSSGVSASVVDVAK | R                                             | G         | 95.00%   | 32  |      | 534.9666 | 3   | 8.6 | 88  | 104 | Yes |
|     |                                                                 |              |                                                                                                                                                                                |                                                                                                                                                                                              |               |          |                                            | DAVSTGLTGAVNLAK    | K                                             | G         | 95.00%   | 87  |      | 708.8907 | 2   | 2.6 | 882 | 896 | Yes |
|     |                                                                 |              |                                                                                                                                                                                |                                                                                                                                                                                              |               |          |                                            | DAVSTGLTGAVNVAK    | K                                             | G         | 95.00%   | 80  |      | 701.8852 | 2   | 6.0 | 486 | 500 | Yes |
|     |                                                                 |              |                                                                                                                                                                                |                                                                                                                                                                                              |               |          |                                            | DAVSTGLTGAVNVAR    | K                                             | G         | 95.00%   | 89  |      | 715.8887 | 2   | 6.4 | 222 | 236 | Yes |
|     |                                                                 |              |                                                                                                                                                                                | DAVTTGVTGAVNVAK                                                                                                                                                                              | K             | G        | 95.00%                                     | 80                 |                                               | 701.8811  | 2        | 0.1 | 948  | 962      | Yes |     |     |     |     |
|     |                                                                 |              |                                                                                                                                                                                | DTIYSGVTSAVNVAK                                                                                                                                                                              | K             | G        | 95.00%                                     | 106                |                                               | 762.9060  | 2        | 8.7 | 618  | 632      | Yes |     |     |     |     |
|     |                                                                 |              |                                                                                                                                                                                | DTMSTGLTGAANVAK                                                                                                                                                                              | K             | G        | 95.00%                                     | 57                 | M3: Oxidation                                 | 726.8597  | 2        | 7.6 | 387  | 401      | Yes |     |     |     |     |
|     |                                                                 |              |                                                                                                                                                                                | DTVFSGVGTGAMSMK                                                                                                                                                                              | K             | G        | 95.00%                                     | 70                 | M11: Oxidation, M13: Oxidation                | 767.3548  | 2        | 5.7 | 981  | 995      | Yes |     |     |     |     |
|     |                                                                 |              |                                                                                                                                                                                | DTVSTGLTGAVNVAK                                                                                                                                                                              | K             | G        | 95.00%                                     | 94                 |                                               | 716.8876  | 2        | 1.8 | 156  | 170      | No  |     |     |     |     |
|     |                                                                 |              |                                                                                                                                                                                | DTVTTGLMGAVNVAK                                                                                                                                                                              | K             | G        | 95.00%                                     | 71                 | M8: Oxidation                                 | 746.8900  | 2        | 2.7 | 684  | 698      | Yes |     |     |     |     |
|     |                                                                 |              |                                                                                                                                                                                | DTVTTGLVGAVNVAK                                                                                                                                                                              | K             | G        | 95.00%                                     | 68                 |                                               | 722.9054  | 2        | 1.2 | 585  | 599      | Yes |     |     |     |     |
|     |                                                                 |              |                                                                                                                                                                                | EVVSSGVGTGAMDMK                                                                                                                                                                              | K             | G        | 95.00%                                     | 56                 | M11: Oxidation, M13: Oxidation                | 757.3540  | 2        | 8.1 | 123  | 137      | No  |     |     |     |     |
|     |                                                                 |              |                                                                                                                                                                                | GAMQTGLNNTTQNIATGTK                                                                                                                                                                          | K             | D        | 95.00%                                     | 84                 |                                               | 911.9589  | 2        | 7.0 | 402  | 419      | No  |     |     |     |     |
|     |                                                                 |              |                                                                                                                                                                                | GVVQGGGLDTTR                                                                                                                                                                                 | K             | S        | 95.00%                                     | 48                 |                                               | 551.7995  | 2        | 4.8 | 105  | 115      | Yes |     |     |     |     |
|     |                                                                 |              |                                                                                                                                                                                | LDQGGSGASAEAAVQEER                                                                                                                                                                           | R             | D        | 95.00%                                     | 110                |                                               | 916.9190  | 2        | 2.1 | 1234 | 1251     | Yes |     |     |     |     |
|     |                                                                 |              |                                                                                                                                                                                | LGDLGPSFR                                                                                                                                                                                    | R             | Q        | 95.00%                                     | 47                 |                                               | 481.2621  | 2        | 5.7 | 1181 | 1189     | Yes |     |     |     |     |
|     |                                                                 |              |                                                                                                                                                                                | VLSAEQGSYFVR                                                                                                                                                                                 | K             | L        | 95.00%                                     | 37                 |                                               | 678.3524  | 2        | 0.8 | 1169 | 1180     | Yes |     |     |     |     |
| 257 | IPI00062037                                                     | DYNLL2       | DYNEIN LIGHT CHAIN 2, CYTOPLASMIC.                                                                                                                                             | DIAAIYK                                                                                                                                                                                      | K             | K        | 95.00%                                     | 37                 |                                               | 793.4537  | 1        | 9.5 | 37   | 43       | No  |     |     |     |     |
|     |                                                                 |              |                                                                                                                                                                                | NFGSYVTHETK                                                                                                                                                                                  | R             | H        | 95.00%                                     | 52                 |                                               | 641.8128  | 2        | 8.5 | 61   | 71       | No  |     |     |     |     |
| 258 | IPI00063234; IPI00219774                                        | PRKAR2A      | PRKAR2A PROTEIN.; CAMP-DEPENDENT PROTEIN KINASE TYPE II-ALPHA REGULATORY SUBUNIT.                                                                                              | AATIVATSEGLWGLDR                                                                                                                                                                             | R             | V        | 95.00%                                     | 106                |                                               | 873.9622  | 2        | 8.0 | 218  | 234      | No  |     |     |     |     |
|     |                                                                 |              |                                                                                                                                                                                | ADEHVIDQGGDGNFYVIER                                                                                                                                                                          | K             | G        | 95.00%                                     | 102                |                                               | 1154.0190 | 2        | 6.2 | 162  | 181      | No  |     |     |     |     |
|     |                                                                 |              |                                                                                                                                                                                | ADEHVIDQGGDGNFYVIER                                                                                                                                                                          | K             | G        | 95.00%                                     | 80                 |                                               | 769.6830  | 3        | 7.3 | 162  | 181      | No  |     |     |     |     |
|     |                                                                 |              |                                                                                                                                                                                | APASVLPAAATPR                                                                                                                                                                                | R             | Q        | 95.00%                                     | 67                 |                                               | 575.8351  | 2        | 3.4 | 45   | 56       | No  |     |     |     |     |
|     |                                                                 |              |                                                                                                                                                                                | DGGNQVEIAR                                                                                                                                                                                   | K             | C        | 95.00%                                     | 48                 |                                               | 594.2887  | 2        | 3.1 | 297  | 307      | No  |     |     |     |     |
|     |                                                                 |              |                                                                                                                                                                                | GQYFGELALVTNKPR                                                                                                                                                                              | K             | A        | 95.00%                                     | 90                 |                                               | 846.9622  | 2        | 5.3 | 311  | 325      | No  |     |     |     |     |
|     |                                                                 |              |                                                                                                                                                                                | GQYFGELALVTNKPR                                                                                                                                                                              | K             | A        | 95.00%                                     | 42                 |                                               | 564.9763  | 3        | 3.3 | 311  | 325      | No  |     |     |     |     |
|     |                                                                 |              |                                                                                                                                                                                | GSFELALMYNTPR                                                                                                                                                                                | R             | A        | 95.00%                                     | 63                 | M9: Oxidation                                 | 786.3848  | 2        | 5.6 | 204  | 217      | No  |     |     |     |     |
|     |                                                                 |              |                                                                                                                                                                                | GTYDILVTK                                                                                                                                                                                    | R             | D        | 95.00%                                     | 53                 |                                               | 505.2834  | 2        | 1.8 | 182  | 190      | No  |     |     |     |     |
|     |                                                                 |              |                                                                                                                                                                                | MFESFIESVPLLK                                                                                                                                                                                | K             | S        | 95.00%                                     | 68                 | M1: Oxidation                                 | 778.4148  | 2        | 8.6 | 251  | 263      | No  |     |     |     |     |
|     |                                                                 |              |                                                                                                                                                                                | MFGSSVDLGNLGG                                                                                                                                                                                | K             | -        | 95.00%                                     | 85                 | M1: Oxidation                                 | 670.8157  | 2        | 5.8 | 370  | 382      | No  |     |     |     |     |
|     |                                                                 |              |                                                                                                                                                                                | NISHYEEQLVK                                                                                                                                                                                  | R             | M        | 95.00%                                     | 58                 |                                               | 680.3518  | 2        | 3.7 | 359  | 369      | No  |     |     |     |     |
|     |                                                                 |              |                                                                                                                                                                                | NLDQEQLSQVLDAMFER                                                                                                                                                                            | K             | I        | 95.00%                                     | 41                 | M14: Oxidation                                | 684.6680  | 3        | 8.6 | 142  | 158      | No  |     |     |     |     |

|     |                                       |                     |                                                                                  |                         |   |   |        |     |                                                        |   |      |      |      |    |
|-----|---------------------------------------|---------------------|----------------------------------------------------------------------------------|-------------------------|---|---|--------|-----|--------------------------------------------------------|---|------|------|------|----|
|     |                                       |                     |                                                                                  | QPPDLVEFAVEYFTR         | R | L | 95.00% | 85  | 969.9925                                               | 2 | 8.8  | 24   | 39   | No |
|     |                                       |                     |                                                                                  | QPPDLVEFAVEYFTR         | R | L | 95.00% | 62  | 646.9969                                               | 3 | 7.7  | 24   | 39   | No |
|     |                                       |                     |                                                                                  | QSLGHPPEPGPDR           | R | V | 95.00% | 42  | 495.2503                                               | 3 | 3.7  | 57   | 70   | No |
| 259 | IPI00063827                           | ABHD14B             | ISOFORM 1 OF ABHYDROLASE DOMAIN-CONTAINING PROTEIN 14B.                          | AVAILDPLGLGHSK          | R | E | 95.00% | 31  | 426.5818                                               | 3 | 5.9  | 64   | 76   | No |
|     |                                       |                     |                                                                                  | FSSETWQNLGLTHR          | R | L | 95.00% | 62  | 838.4217                                               | 2 | 9.8  | 43   | 56   | No |
|     |                                       |                     |                                                                                  | FSSETWQNLGLTHR          | R | L | 95.00% | 37  | 559.2835                                               | 3 | 9.4  | 43   | 56   | No |
|     |                                       |                     |                                                                                  | FVLLHGLR                | R | F | 95.00% | 34  | 577.8599                                               | 2 | 5.9  | 33   | 42   | No |
| 260 | IPI00063903; IPI00640630              | USMG5               | UP-REGULATED DURING SKELETAL MUSCLE GROWTH PROTEIN 5.; 7 KDA PROTEIN.            | AGPESDAQYQFTGIK         | M | K | 95.00% | 111 | 806.3893                                               | 2 | 3.2  | 2    | 16   | No |
|     |                                       |                     |                                                                                  | AGPESDAQYQFTGIK         | M | K | 95.00% | 43  | 537.9315                                               | 3 | 8.2  | 2    | 16   | No |
|     |                                       |                     |                                                                                  | AGPESDAQYQFTGIKK        | M | Y | 95.00% | 88  | 870.4426                                               | 2 | 9.6  | 2    | 17   | No |
|     |                                       |                     |                                                                                  | KYFNSTLTGR              | K | M | 95.00% | 48  | 675.3519                                               | 2 | 7.8  | 17   | 27   | No |
|     |                                       |                     |                                                                                  | YFNSTLTGR               | K | M | 95.00% | 58  | 611.3041                                               | 2 | 8.2  | 18   | 27   | No |
| 261 | IPI00065501                           | JSRP1               | JUNCTIONAL SARCOPLASMIC RETICULUM PROTEIN 1.                                     | DAVPGEAALQAR            | R | V | 95.00% | 39  | 599.3174                                               | 2 | 3.4  | 146  | 157  | No |
|     |                                       |                     |                                                                                  | EAAENDEEPEGATGEAVR      | R | E | 95.00% | 84  | 1001.9360                                              | 2 | 8.3  | 206  | 224  | No |
|     |                                       |                     |                                                                                  | EAAENDEEPEGATGEAVREDR   | R | V | 95.00% | 70  | 801.6811                                               | 3 | 3.8  | 206  | 227  | No |
|     |                                       |                     |                                                                                  | FEAQAPPSAPPAPR          | K | A | 95.00% | 39  | 718.3737                                               | 2 | 4.1  | 179  | 192  | No |
|     |                                       |                     |                                                                                  | LADSGSVPHDSQVAEGPSVDTR  |   |   |        |     |                                                        |   |      |      |      |    |
|     |                                       |                     |                                                                                  | PK                      | R | K | 95.00% | 70  | 817.0757                                               | 3 | 6.5  | 41   | 64   | No |
| 262 | IPI00069693                           |                     | SIMILAR TO RIBOSOMAL PROTEIN L14.                                                | GTAAAAAATAAK            | K | V | 95.00% | 40  | 508.2827                                               | 2 | 3.9  | 148  | 160  | No |
|     |                                       |                     |                                                                                  | LVAIVDVIDQNR            | K | A | 95.00% | 35  | 677.8943                                               | 2 | 8.4  | 24   | 35   | No |
| 263 | IPI00075248; IPI00386621; IPI00794543 | CALM1; CALM2; CALM3 | CALMODULIN.; CALM3 PROTEIN.; 17 KDA PROTEIN.                                     | EADIDGDGQVNYEEFVQMMTAK  | R | - | 95.00% | 42  | M18: Oxidation, M19: Oxidation 841.3704                | 3 | 10.0 | 128  | 149  | No |
|     |                                       |                     |                                                                                  | EAFSLFDK                | K | D | 95.00% | 36  | 478.7440                                               | 2 | 7.7  | 15   | 22   | No |
|     |                                       |                     |                                                                                  | EAFSLFDKDGDTITTK        | K | E | 95.00% | 74  | 922.9575                                               | 2 | 8.1  | 15   | 31   | No |
|     |                                       |                     |                                                                                  | EAFSLFDKDGDTITTK        | K | E | 95.00% | 39  | 615.6412                                               | 3 | 8.6  | 15   | 31   | No |
|     |                                       |                     |                                                                                  | ELGTVMR                 | K | S | 95.00% | 39  | M6: Oxidation 411.2155                                 | 2 | 4.9  | 32   | 38   | No |
|     |                                       |                     |                                                                                  | VFDKDGNGYISAAELR        | R | H | 95.00% | 102 | 877.9471                                               | 2 | 8.5  | 92   | 107  | No |
|     |                                       |                     |                                                                                  | VFDKDGNGYISAAELR        | R | H | 95.00% | 51  | 585.6325                                               | 3 | 5.9  | 92   | 107  | No |
| 264 | IPI00098902                           | OGDH                | OXOGLUTARATE (ALPHA-KETOGLUTARATE) DEHYDROGENASE (LIPOAMIDE) ISOFORM 1PRECURSOR. | ARDMVGQVAITR            | K | I | 95.00% | 29  | M4: Oxidation 666.8592                                 | 2 | 3.6  | 918  | 929  | No |
|     |                                       |                     |                                                                                  | DMVGQVAITR              | R | I | 95.00% | 47  | M2: Oxidation 553.2885                                 | 2 | 1.3  | 920  | 929  | No |
|     |                                       |                     |                                                                                  | FEFLQR                  | R | K | 95.00% | 46  | 484.7482                                               | 2 | 4.5  | 264  | 270  | No |
|     |                                       |                     |                                                                                  | FETPGIMQFTNEEK          | K | R | 95.00% | 46  | M7: Oxidation 843.8931                                 | 2 | 5.8  | 238  | 251  | No |
|     |                                       |                     |                                                                                  | GHHVAQLDPLGILDADLDSSVPA |   |   |        |     |                                                        |   |      |      |      |    |
|     |                                       |                     |                                                                                  | DIISSTDK                | R | L | 95.00% | 92  | 1067.2180                                              | 3 | 8.0  | 141  | 171  | No |
|     |                                       |                     |                                                                                  | GHHVAQLDPLGILDADLDSSVPA |   |   |        |     |                                                        |   |      |      |      |    |
|     |                                       |                     |                                                                                  | DIISSTDK                | R | L | 95.00% | 64  | 800.6661                                               | 4 | 9.0  | 141  | 171  | No |
|     |                                       |                     |                                                                                  | GRLNVLNVIR              | R | K | 95.00% | 72  | 612.8830                                               | 2 | 3.3  | 313  | 323  | No |
|     |                                       |                     |                                                                                  | GSLAAVAHAQSLVEAQPNDK    | R | L | 95.00% | 109 | 1053.0610                                              | 2 | 6.8  | 102  | 122  | No |
|     |                                       |                     |                                                                                  | GSLAAVAHAQSLVEAQPNDK    | R | L | 95.00% | 50  | 702.3732                                               | 3 | 2.3  | 102  | 122  | No |
|     |                                       |                     |                                                                                  | GSLAAVAHAQSLVEAQPNDKL   |   |   |        |     |                                                        |   |      |      |      |    |
|     |                                       |                     |                                                                                  | VEDHLAVQSLIR            | R | A | 95.00% | 58  | 1193.6550                                              | 3 | 5.9  | 102  | 135  | No |
|     |                                       |                     |                                                                                  | GSLAAVAHAQSLVEAQPNDKL   |   |   |        |     |                                                        |   |      |      |      |    |
|     |                                       |                     |                                                                                  | VEDHLAVQSLIR            | R | A | 95.00% | 42  | 895.4962                                               | 4 | 9.0  | 102  | 135  | No |
|     |                                       |                     |                                                                                  | GSLAAVAHAQSLVEAQPNDKL   |   |   |        |     |                                                        |   |      |      |      |    |
|     |                                       |                     |                                                                                  | VEDHLAVQSLIR            | R | A | 95.00% | 26  | 716.5979                                               | 5 | 8.1  | 102  | 135  | No |
|     |                                       |                     |                                                                                  | HWLDSPPWPGFFTLGGQPR     | K | S | 95.00% | 39  | 719.3552                                               | 3 | 6.7  | 583  | 600  | No |
|     |                                       |                     |                                                                                  | IEQLSPFPFDLLK           | R | E | 95.00% | 80  | 830.4777                                               | 2 | 6.7  | 930  | 943  | No |
|     |                                       |                     |                                                                                  | KPLIIFTPK               | R | S | 95.00% | 58  | 528.8497                                               | 2 | 8.7  | 852  | 860  | No |
|     |                                       |                     |                                                                                  | LEAADEGSGDVK            | K | Y | 95.00% | 50  | 595.7836                                               | 2 | 4.3  | 337  | 348  | No |
|     |                                       |                     |                                                                                  | LGFYGLDESDLDK           | K | V | 95.00% | 90  | 736.3547                                               | 2 | 3.9  | 172  | 184  | No |
|     |                                       |                     |                                                                                  | LLDTAFDLDFVK            | R | N | 95.00% | 117 | 698.8746                                               | 2 | 3.5  | 1009 | 1020 | No |
|     |                                       |                     |                                                                                  | LNVLNVIR                | R | K | 95.00% | 67  | 506.3211                                               | 2 | 2.9  | 315  | 323  | No |
|     |                                       |                     |                                                                                  | LNVLNVIRK               | R | E | 95.00% | 44  | 570.3682                                               | 2 | 1.7  | 315  | 324  | No |
|     |                                       |                     |                                                                                  | LVEDHLAVQSLIR           | K | A | 95.00% | 88  | 746.9318                                               | 2 | 4.6  | 123  | 135  | No |
|     |                                       |                     |                                                                                  | LVEDHLAVQSLIR           | K | A | 95.00% | 63  | 498.2903                                               | 3 | 4.2  | 123  | 135  | No |
|     |                                       |                     |                                                                                  | NGHNEMDEPMFTQPLMYK      | R | Q | 95.00% | 44  | M6: Oxidation, M10: Oxidation, M16: Oxidation 743.9853 | 3 | 6.7  | 511  | 528  | No |
|     |                                       |                     |                                                                                  | NITLSLVANPSHLEAADPVVMGK | R | T | 95.00% | 103 | M21: Oxidation 1196.6390                               | 2 | 6.7  | 365  | 387  | No |
|     |                                       |                     |                                                                                  | NITLSLVANPSHLEAADPVVMGK | R | T | 95.00% | 73  | M21: Oxidation 798.0937                                | 3 | 4.6  | 365  | 387  | No |

|     |                                                    |          |                                                                                                                                                                                    |                           |   |   |        |     |                                                      |           |   |      |     |     |    |
|-----|----------------------------------------------------|----------|------------------------------------------------------------------------------------------------------------------------------------------------------------------------------------|---------------------------|---|---|--------|-----|------------------------------------------------------|-----------|---|------|-----|-----|----|
|     |                                                    |          |                                                                                                                                                                                    | NQGYDYVKPR                | K | L | 95.00% | 49  |                                                      | 701.8465  | 2 | 6.8  | 962 | 972 | No |
|     |                                                    |          |                                                                                                                                                                                    | NTNAGAPPGTAYQSPLPLSR      | R | G | 95.00% | 132 |                                                      | 1006.5230 | 2 | 8.6  | 82  | 101 | No |
|     |                                                    |          |                                                                                                                                                                                    | NTNAGAPPGTAYQSPLPLSR      | R | G | 95.00% | 34  |                                                      | 671.3489  | 3 | 5.3  | 82  | 101 | No |
|     |                                                    |          |                                                                                                                                                                                    | QILLPFR                   | R | K | 95.00% | 34  |                                                      | 443.7822  | 2 | 5.6  | 845 | 851 | No |
|     |                                                    |          |                                                                                                                                                                                    | RQILLPFR                  | R | K | 95.00% | 25  |                                                      | 521.8318  | 2 | 2.9  | 844 | 851 | No |
|     |                                                    |          |                                                                                                                                                                                    | SSENGVDYVIMGMPHR          | K | G | 95.00% | 51  | M11: Oxidation,<br>M13: Oxidation<br>M11: Oxidation, | 912.4134  | 2 | 7.3  | 297 | 312 | No |
|     |                                                    |          |                                                                                                                                                                                    | SSENGVDYVIMGMPHR          | K | G | 95.00% | 52  | M13: Oxidation                                       | 608.6092  | 3 | 3.4  | 297 | 312 | No |
|     |                                                    |          |                                                                                                                                                                                    | SSFDEMLPGTHFQR            | R | V | 95.00% | 66  | M6: Oxidation                                        | 834.3832  | 2 | 5.9  | 870 | 883 | No |
|     |                                                    |          |                                                                                                                                                                                    | SSFDEMLPGTHFQR            | R | V | 95.00% | 36  | M6: Oxidation                                        | 556.5915  | 3 | 5.9  | 870 | 883 | No |
|     |                                                    |          |                                                                                                                                                                                    | SSPYPTDVAR                | R | V | 95.00% | 33  |                                                      | 1092.5390 | 1 | 5.5  | 457 | 466 | No |
|     |                                                    |          |                                                                                                                                                                                    | SSPYPTDVAR                | R | V | 95.00% | 45  |                                                      | 546.7717  | 2 | 2.7  | 457 | 466 | No |
|     |                                                    |          |                                                                                                                                                                                    | STRFEFLQR                 | R | K | 95.00% | 40  |                                                      | 656.8389  | 2 | 3.8  | 261 | 270 | No |
|     |                                                    |          |                                                                                                                                                                                    | STRFEFLQR                 | R | K | 95.00% | 30  |                                                      | 438.2292  | 3 | 5.2  | 261 | 270 | No |
|     |                                                    |          |                                                                                                                                                                                    | SWDIFFR                   | K | N | 95.00% | 46  |                                                      | 485.7460  | 2 | 5.7  | 75  | 81  | No |
|     |                                                    |          |                                                                                                                                                                                    | TIIDKSSENGVDYVIMGMPHR     | K | G | 95.00% | 51  | M16: Oxidation,<br>M18: Oxidation<br>M10: Oxidation  | 798.7261  | 3 | 8.2  | 292 | 312 | No |
|     |                                                    |          |                                                                                                                                                                                    | TVDWALAEYMAFGSLK          | R | E | 95.00% | 65  |                                                      | 644.3314  | 3 | 8.3  | 650 | 666 | No |
|     |                                                    |          |                                                                                                                                                                                    | VFHLPTTTFFIGQESALPLR      | K | E | 95.00% | 57  |                                                      | 728.7372  | 3 | 6.4  | 185 | 204 | No |
|     |                                                    |          |                                                                                                                                                                                    | VIPEDGPAQNPENVK           | R | R | 95.00% | 69  |                                                      | 839.4296  | 2 | 3.9  | 884 | 899 | No |
|     |                                                    |          |                                                                                                                                                                                    | VIPEDGPAQNPENVKR          | R | L | 95.00% | 108 |                                                      | 917.4762  | 2 | -0.8 | 884 | 900 | No |
|     |                                                    |          |                                                                                                                                                                                    | VYYDLTR                   | K | E | 95.00% | 38  |                                                      | 465.2418  | 2 | 2.8  | 908 | 914 | No |
|     |                                                    |          |                                                                                                                                                                                    | YAELLVSQGVVNPPEYEEIISK    | K | Y | 95.00% | 61  |                                                      | 842.0941  | 3 | 8.2  | 540 | 561 | No |
|     |                                                    |          |                                                                                                                                                                                    | YAELLVSQGVVNPPEYEEIISKYDK | K | I | 95.00% | 83  |                                                      | 977.4916  | 3 | 9.6  | 540 | 564 | No |
| 265 | IPI00100160; IPI00746694                           | CAND1    | ISOFORM 1 OF CULLIN-ASSOCIATED NEDD8-DISSOCIATED PROTEIN 1.; SIMILAR TO TIP120.                                                                                                    | ALTLIAGSPLK               | K | I | 95.00% | 65  |                                                      | 542.3453  | 2 | 4.4  | 631 | 641 | No |
|     |                                                    |          |                                                                                                                                                                                    | EGPAVVGQFIQDVK            | K | N | 95.00% | 47  |                                                      | 743.9058  | 2 | 8.8  | 813 | 826 | No |
|     |                                                    |          |                                                                                                                                                                                    | FMATNDLMTLEQK             | R | D | 95.00% | 58  | M2: Oxidation, M8: Oxidation                         | 787.3693  | 2 | 4.1  | 24  | 36  | No |
|     |                                                    |          |                                                                                                                                                                                    | IDLRPVLGEGVPILASFLR       | K | K | 95.00% | 56  |                                                      | 689.0827  | 3 | 7.1  | 642 | 660 | No |
|     |                                                    |          |                                                                                                                                                                                    | ISGSILNELIGLVR            | K | S | 95.00% | 105 |                                                      | 742.4510  | 2 | 6.3  | 730 | 743 | No |
|     |                                                    |          |                                                                                                                                                                                    | ITSEALLVTQQLVK            | K | V | 95.00% | 26  |                                                      | 771.9644  | 2 | 6.6  | 535 | 548 | No |
|     |                                                    |          |                                                                                                                                                                                    | LGTLALSALDILIK            | K | N | 95.00% | 87  |                                                      | 628.9011  | 2 | 8.8  | 668 | 679 | No |
|     |                                                    |          |                                                                                                                                                                                    | LTLIDPETLLPR              | K | L | 95.00% | 49  |                                                      | 690.9141  | 2 | 7.1  | 958 | 969 | No |
|     |                                                    |          |                                                                                                                                                                                    | SVILEAFSSPSEEVK           | K | S | 95.00% | 76  |                                                      | 811.4266  | 2 | 8.0  | 859 | 873 | No |
|     |                                                    |          |                                                                                                                                                                                    | VIRPLDQPSSFDATPYIK        | K | D | 95.00% | 27  |                                                      | 683.0386  | 3 | 6.6  | 549 | 566 | No |
| 266 | IPI00100192; IPI00619911; IPI00647805; IPI00807412 | NT5C3    | ISOFORM 3 OF CYTOSOLIC 5'-NUCLEOTIDASE III.; ISOFORM 1 OF CYTOSOLIC 5'-NUCLEOTIDASE III.; ISOFORM 4 OF CYTOSOLIC 5'-NUCLEOTIDASE III.; ISOFORM 2 OF CYTOSOLIC 5'-NUCLEOTIDASE III. | EIVAESDVMLK               | K | E | 95.00% | 39  | M9: Oxidation                                        | 625.3227  | 2 | 2.1  | 122 | 132 | No |
|     |                                                    |          |                                                                                                                                                                                    | GFKGELIHVFNK              | K | H | 95.00% | 37  |                                                      | 463.5975  | 3 | 5.5  | 191 | 202 | No |
|     |                                                    |          |                                                                                                                                                                                    | LKEIVAESDVMLK             | K | E | 95.00% | 60  | M11: Oxidation                                       | 745.9176  | 2 | 8.8  | 120 | 132 | No |
|     |                                                    |          |                                                                                                                                                                                    | MADGVANVEHILK             | R | I | 95.00% | 59  | M1: Oxidation                                        | 706.8702  | 2 | 8.4  | 234 | 246 | No |
|     |                                                    |          |                                                                                                                                                                                    | MADGVANVEHILK             | R | I | 95.00% | 43  | M1: Oxidation                                        | 471.5823  | 3 | 7.4  | 234 | 246 | No |
|     |                                                    |          |                                                                                                                                                                                    | NTEYFNQLK                 | R | D | 95.00% | 32  |                                                      | 578.7886  | 2 | 4.6  | 209 | 217 | No |
|     |                                                    |          |                                                                                                                                                                                    | SHGLLVQQALPK              | K | A | 95.00% | 70  |                                                      | 645.8850  | 2 | 6.6  | 106 | 117 | No |
|     |                                                    |          |                                                                                                                                                                                    | SHGLLVQQALPK              | K | A | 95.00% | 30  |                                                      | 430.9259  | 3 | 6.6  | 106 | 117 | No |
| 267 | IPI00100775                                        | C11orf67 | ISOFORM 1 OF UPF0366 PROTEIN C11ORF67.                                                                                                                                             | ETGTEHSPGVQPADVK          | R | E | 95.00% | 46  |                                                      | 826.4044  | 2 | 4.8  | 40  | 55  | No |
|     |                                                    |          |                                                                                                                                                                                    | EYNALVAQGVR               | K | V | 95.00% | 38  |                                                      | 1219.6540 | 1 | 8.9  | 103 | 113 | No |
|     |                                                    |          |                                                                                                                                                                                    | EYNALVAQGVR               | K | V | 95.00% | 88  |                                                      | 610.3295  | 2 | 6.2  | 103 | 113 | No |
|     |                                                    |          |                                                                                                                                                                                    | GVQTLVIGR                 | K | G | 95.00% | 27  |                                                      | 942.5825  | 1 | 9.3  | 61  | 69  | No |
|     |                                                    |          |                                                                                                                                                                                    | GVQTLVIGR                 | K | G | 95.00% | 79  |                                                      | 471.7934  | 2 | 5.6  | 61  | 69  | No |
|     |                                                    |          |                                                                                                                                                                                    | VLQTEQAVK                 | R | E | 95.00% | 46  |                                                      | 508.2966  | 2 | 6.4  | 94  | 102 | No |
|     |                                                    |          |                                                                                                                                                                                    | VPSSTVEYLK                | K | K | 95.00% | 48  |                                                      | 561.8071  | 2 | 1.5  | 77  | 86  | No |
|     |                                                    |          |                                                                                                                                                                                    | VPSSTVEYLKK               | K | H | 95.00% | 44  |                                                      | 625.8583  | 2 | 7.2  | 77  | 87  | No |
| 268 | IPI00100980                                        | EHD2     | EH DOMAIN-CONTAINING PROTEIN 2.                                                                                                                                                    | ADMVETQQLMR               | K | V | 95.00% | 42  | M3: Oxidation,<br>M10: Oxidation                     | 677.3160  | 2 | 7.3  | 221 | 231 | No |
|     |                                                    |          |                                                                                                                                                                                    | FGAFHSPALEDADFDGKPMVLV    | R | T | 95.00% | 33  | M19: Oxidation                                       | 1057.8490 | 3 | 6.9  | 42  | 71  | No |
|     |                                                    |          |                                                                                                                                                                                    | AGQYSTGK                  | R | T | 95.00% | 62  | M19: Oxidation                                       | 793.6395  | 4 | 7.9  | 42  | 71  | No |
|     |                                                    |          |                                                                                                                                                                                    | AGQYSTGK                  | R | W | 95.00% | 46  |                                                      | 519.2769  | 2 | 3.6  | 168 | 176 | No |
|     |                                                    |          |                                                                                                                                                                                    | KLNPFNGNTFLNR             | R | F | 95.00% | 44  |                                                      | 710.8920  | 2 | 4.2  | 124 | 135 | No |
|     |                                                    |          |                                                                                                                                                                                    | KLNPFNGNTFLNR             | R | F | 95.00% | 41  |                                                      | 474.2649  | 3 | 6.3  | 124 | 135 | No |
|     |                                                    |          |                                                                                                                                                                                    | LEGHGLPANLPR              | K | R | 95.00% | 50  |                                                      | 637.3573  | 2 | 3.8  | 517 | 528 | No |
|     |                                                    |          |                                                                                                                                                                                    | LEGHGLPANLPR              | K | R | 95.00% | 54  |                                                      | 425.2403  | 3 | 2.6  | 517 | 528 | No |

|     |                                                      |         |                                                                              |                                                                                                                                           |   |   |        |     |                                 |          |   |     |      |      |    |
|-----|------------------------------------------------------|---------|------------------------------------------------------------------------------|-------------------------------------------------------------------------------------------------------------------------------------------|---|---|--------|-----|---------------------------------|----------|---|-----|------|------|----|
|     |                                                      |         |                                                                              | LEISDEFSEAIGALR                                                                                                                           | K | G | 95.00% | 110 |                                 | 825.4290 | 2 | 7.0 | 194  | 208  | No |
|     |                                                      |         |                                                                              | LFELEEQDLFR                                                                                                                               | R | D | 95.00% | 94  |                                 | 719.8681 | 2 | 4.5 | 270  | 280  | No |
|     |                                                      |         |                                                                              | LLEALDEMLTHDIAK                                                                                                                           | K | L | 95.00% | 65  | M8: Oxidation                   | 864.4544 | 2 | 6.8 | 378  | 392  | No |
|     |                                                      |         |                                                                              | LLEALDEMLTHDIAK                                                                                                                           | K | L | 95.00% | 30  | M8: Oxidation                   | 576.6404 | 3 | 9.5 | 378  | 392  | No |
|     |                                                      |         |                                                                              | LLPLEEHYR                                                                                                                                 | K | F | 95.00% | 27  |                                 | 585.3249 | 2 | 8.6 | 33   | 41   | No |
|     |                                                      |         |                                                                              | LNPFGNTFLNR                                                                                                                               | K | F | 95.00% | 44  |                                 | 646.8452 | 2 | 5.6 | 125  | 135  | No |
|     |                                                      |         |                                                                              | LPNSVLGR                                                                                                                                  | K | I | 95.00% | 49  |                                 | 428.2573 | 2 | 1.9 | 481  | 488  | No |
|     |                                                      |         |                                                                              | QEELESTEVGVGGAFFEGTHM<br>GPFVER                                                                                                           | R | G | 95.00% | 112 | M21: Oxidation                  | 979.4581 | 3 | 7.4 | 399  | 425  | No |
|     |                                                      |         |                                                                              | RLFEELEQDLFR                                                                                                                              | R | D | 95.00% | 41  |                                 | 532.2822 | 3 | 4.9 | 269  | 280  | No |
|     |                                                      |         |                                                                              | SKYDEIFYNLAPADGK                                                                                                                          | K | L | 95.00% | 111 |                                 | 915.9584 | 2 | 9.5 | 451  | 466  | No |
|     |                                                      |         |                                                                              | SKYDEIFYNLAPADGK                                                                                                                          | K | L | 95.00% | 43  |                                 | 610.9717 | 3 | 4.3 | 451  | 466  | No |
|     |                                                      |         |                                                                              | TSFIQYLLQEVPGSR                                                                                                                           | K | V | 95.00% | 38  |                                 | 933.9910 | 2 | 7.4 | 72   | 87   | No |
|     |                                                      |         |                                                                              | TSFIQYLLQEVPGSR                                                                                                                           | K | V | 95.00% | 60  |                                 | 622.9960 | 3 | 6.4 | 72   | 87   | No |
|     |                                                      |         |                                                                              | VHAYIISYLK                                                                                                                                | R | K | 95.00% | 45  |                                 | 603.8539 | 2 | 9.5 | 306  | 315  | No |
|     |                                                      |         |                                                                              | VYIGSFWSQPLLVPDNR                                                                                                                         | R | R | 95.00% | 42  |                                 | 996.0312 | 2 | 7.8 | 252  | 268  | No |
|     |                                                      |         |                                                                              | PDZ AND LIM DOMAIN PROTEIN 5.; PDZ AND LIM<br>DOMAIN 5 ISOFORM E.; PDZ AND LIM DOMAIN 5<br>ISOFORM D.; PDZ AND LIM DOMAIN 5 ISOFORM<br>B. |   |   |        |     |                                 |          |   |     |      |      |    |
| 269 | IPI0007935; IPI00103146; IPI00552367;<br>IPI00553102 | PDLIM5  |                                                                              | ASAAPKPEPVPVQK                                                                                                                            | R | G | 95.00% | 39  |                                 | 709.9066 | 2 | 3.2 | 84   | 97   | No |
|     |                                                      |         |                                                                              | ASAAPKPEPVPVQK                                                                                                                            | R | G | 95.00% | 39  |                                 | 473.6076 | 3 | 4.5 | 84   | 97   | No |
|     |                                                      |         |                                                                              | ASAAPKPEPVPVQK                                                                                                                            | R | K | 95.00% | 47  |                                 | 709.9100 | 2 | 8.0 | 84   | 97   | No |
|     |                                                      |         |                                                                              | ASAAPKPEPVPVQK                                                                                                                            | R | K | 95.00% | 52  |                                 | 473.6085 | 3 | 6.3 | 84   | 97   | No |
|     |                                                      |         |                                                                              | ASAAPKPEPVPVQK                                                                                                                            | R | T | 95.00% | 33  |                                 | 516.3064 | 3 | 5.0 | 84   | 98   | No |
|     |                                                      |         |                                                                              | DFNMPLTISSLK                                                                                                                              | K | D | 95.00% | 68  | M4: Oxidation                   | 691.3614 | 2 | 8.0 | 23   | 34   | No |
|     |                                                      |         |                                                                              | DFNMPLTISSLK                                                                                                                              | K | D | 95.00% | 69  |                                 | 683.3624 | 2 | 5.9 | 23   | 34   | No |
|     |                                                      |         |                                                                              | EKIPLHVFSPK                                                                                                                               | K | Y | 95.00% | 31  |                                 | 647.8818 | 2 | 2.5 | 185  | 195  | No |
|     |                                                      |         |                                                                              | IGDVVLSIDGINAQQMTHLEAQN<br>K                                                                                                              | R | I | 95.00% | 66  | M16: Oxidation                  | 847.1074 | 3 | 9.3 | 46   | 69   | No |
|     |                                                      |         |                                                                              | IGDVVLSIDGINAQQMTHLEAQN<br>K                                                                                                              | R | I | 95.00% | 64  |                                 | 841.7740 | 3 | 7.4 | 46   | 69   | No |
|     |                                                      |         |                                                                              | ILAQITGTEHLK                                                                                                                              | R | E | 95.00% | 56  |                                 | 662.3886 | 2 | 4.2 | 285  | 296  | No |
|     |                                                      |         |                                                                              | ILAQITGTEHLK                                                                                                                              | R | E | 95.00% | 54  |                                 | 441.9292 | 3 | 6.0 | 162  | 173  | No |
|     |                                                      |         |                                                                              | ILAQITGTEHLKESEADNTK                                                                                                                      | R | K | 95.00% | 37  |                                 | 733.3893 | 3 | 9.9 | 162  | 181  | No |
|     |                                                      |         |                                                                              | IPLHVFSPK                                                                                                                                 | K | Y | 95.00% | 50  |                                 | 519.3143 | 2 | 5.6 | 187  | 195  | No |
|     |                                                      |         |                                                                              | LIEDTEDWRPR                                                                                                                               | R | T | 95.00% | 35  |                                 | 715.3622 | 2 | 6.1 | 141  | 151  | No |
|     |                                                      |         |                                                                              | LRDWWHEVSAR                                                                                                                               | K | A | 95.00% | 46  |                                 | 703.3637 | 2 | 7.6 | 199  | 209  | No |
|     |                                                      |         |                                                                              | YTEFYHVPTSDASK                                                                                                                            | R | K | 95.00% | 59  |                                 | 891.4181 | 2 | 8.4 | 124  | 138  | No |
|     |                                                      |         |                                                                              | YTEFYHVPTSDASK                                                                                                                            | R | K | 95.00% | 39  |                                 | 594.6151 | 3 | 9.1 | 124  | 138  | No |
| 270 | IPI00103467                                          | ALDH1B1 | ALDEHYDE DEHYDROGENASE X,<br>MITOCHONDRIAL PRECURSOR.                        | EEIFGPVQPLFK                                                                                                                              | K | F | 95.00% | 29  |                                 | 702.3871 | 2 | 6.3 | 415  | 426  | No |
|     |                                                      |         |                                                                              | GFFIKPTVGGVQDDMR                                                                                                                          | R | I | 95.00% | 38  | M16: Oxidation                  | 643.9926 | 3 | 4.5 | 395  | 411  | No |
|     |                                                      |         |                                                                              | IAKEEIFGPVQPLFK                                                                                                                           | R | F | 95.00% | 34  |                                 | 858.4968 | 2 | 7.0 | 412  | 426  | No |
|     |                                                      |         |                                                                              | IAKEEIFGPVQPLFK                                                                                                                           | R | F | 95.00% | 44  |                                 | 572.6659 | 3 | 4.8 | 412  | 426  | No |
|     |                                                      |         |                                                                              | KTFFPTVNPTTGEVIGHVAEGDRA<br>DVDR                                                                                                          | K | A | 95.00% | 53  |                                 | 721.1223 | 4 | 7.3 | 52   | 78   | No |
|     |                                                      |         |                                                                              | KVGNPFELDTQQGPQVDKEQFE<br>R                                                                                                               | R | V | 95.00% | 46  |                                 | 897.1192 | 3 | 7.3 | 347  | 369  | No |
|     |                                                      |         |                                                                              | KVGNPFELDTQQGPQVDKEQFE<br>R                                                                                                               | R | V | 95.00% | 38  |                                 | 673.0890 | 4 | 3.7 | 347  | 369  | No |
|     |                                                      |         |                                                                              | LAPALATGNTVVMK                                                                                                                            | K | V | 95.00% | 90  | M13: Oxidation                  | 701.3948 | 2 | 3.0 | 196  | 209  | No |
|     |                                                      |         |                                                                              | LLNLLADLVER                                                                                                                               | R | D | 95.00% | 73  |                                 | 634.8891 | 2 | 9.8 | 104  | 114  | No |
|     |                                                      |         |                                                                              | TFVEESIYNEFLER                                                                                                                            | R | T | 95.00% | 98  |                                 | 888.4343 | 2 | 6.6 | 325  | 338  | No |
|     |                                                      |         |                                                                              | VAEQTPLSALYLASLIK                                                                                                                         | K | E | 95.00% | 100 |                                 | 909.0339 | 2 | 9.6 | 210  | 226  | No |
|     |                                                      |         |                                                                              | VAFTGSTEVGHLIQK                                                                                                                           | K | A | 95.00% | 96  |                                 | 793.9348 | 2 | 4.7 | 258  | 272  | No |
|     |                                                      |         |                                                                              | VGNPFELDTQQGPQVDKEQFE<br>R                                                                                                                | K | V | 95.00% | 58  |                                 | 854.4218 | 3 | 8.8 | 348  | 369  | No |
|     |                                                      |         |                                                                              | VLGYIQLGQK                                                                                                                                | R | E | 95.00% | 60  |                                 | 559.8356 | 2 | 5.1 | 370  | 379  | No |
|     |                                                      |         |                                                                              | YGLAAAVFTR                                                                                                                                | R | D | 95.00% | 64  |                                 | 534.7987 | 2 | 5.0 | 442  | 451  | No |
| 271 | IPI00103994                                          | LARS    | LEUCYL-TRNA SYNTHETASE, CYTOPLASMIC.                                         | SFITTDVNPYYDSFVR                                                                                                                          | R | W | 95.00% | 73  |                                 | 962.4697 | 2 | 9.8 | 204  | 219  | No |
|     |                                                      |         |                                                                              | STGNFLTLTQAIDK                                                                                                                            | K | F | 95.00% | 54  |                                 | 754.9084 | 2 | 8.3 | 720  | 733  | No |
|     |                                                      |         |                                                                              | TGFFEFQAAK                                                                                                                                | K | D | 95.00% | 44  |                                 | 573.2889 | 2 | 5.9 | 823  | 832  | No |
|     |                                                      |         |                                                                              | VDIGDTIYLTVH                                                                                                                              | R | - | 95.00% | 79  |                                 | 679.3766 | 2 | 6.2 | 1165 | 1176 | No |
|     |                                                      |         |                                                                              | VFASELNAGIIK                                                                                                                              | R | T | 95.00% | 94  |                                 | 631.3652 | 2 | 5.4 | 796  | 807  | No |
|     |                                                      |         |                                                                              | VFEVNASNLEK                                                                                                                               | R | Q | 95.00% | 55  |                                 | 625.3274 | 2 | 3.3 | 29   | 39   | No |
| 272 | IPI00152330; IPI00647802                             | LRRC20  | ISOFORM 1 OF LEUCINE-RICH REPEAT-<br>CONTAINING PROTEIN 20.; 20 KDA PROTEIN. | ELHLEGFLHR                                                                                                                                | R | L | 95.00% | 41  |                                 | 455.5773 | 3 | 6.3 | 78   | 88   | No |
|     |                                                      |         |                                                                              | FDMLMSPEGAR                                                                                                                               | K | A | 95.00% | 34  | M3: Oxidation, M5:<br>Oxidation | 643.2866 | 2 | 7.5 | 170  | 180  | No |
|     |                                                      |         |                                                                              | FMTTFSQLR                                                                                                                                 | K | E | 95.00% | 53  | M2: Oxidation                   | 573.7893 | 2 | 7.9 | 69   | 77   | No |

|     |                          |       |                                                                                      |                          |   |   |        |     |                |           |   |     |      |      |    |
|-----|--------------------------|-------|--------------------------------------------------------------------------------------|--------------------------|---|---|--------|-----|----------------|-----------|---|-----|------|------|----|
|     |                          |       |                                                                                      | FNPLNAEVR                | R | V | 95.00% | 47  |                | 530.2862  | 2 | 5.5 | 153  | 161  | No |
|     |                          |       |                                                                                      | LPSEVSALQHLK             | R | A | 95.00% | 57  |                | 441.2567  | 3 | 4.9 | 89   | 100  | No |
|     |                          |       |                                                                                      | LVSFPIGIYK               | K | V | 95.00% | 47  |                | 568.8453  | 2 | 9.3 | 34   | 43   | No |
|     |                          |       |                                                                                      | NVSGQIHLLTLANNELK        | R | S | 95.00% | 32  |                | 622.0185  | 3 | 5.6 | 47   | 63   | No |
|     |                          |       |                                                                                      | VIAPPLIK                 | R | F | 95.00% | 20  |                | 425.7953  | 2 | 7.2 | 162  | 169  | No |
|     |                          |       |                                                                                      | VDLSTSTDWK               | K | E | 95.00% | 43  |                | 576.2880  | 2 | 8.3 | 87   | 96   | No |
| 273 | IPI00155601              | LRP16 | PROTEIN LRP16.                                                                       | YVIHTVGIPIAYGEPASQAALER  | K | S | 95.00% | 75  |                | 810.4283  | 3 | 9.4 | 222  | 244  | No |
|     |                          |       | G PROTEIN PATHWAY SUPPRESSOR 1 ISOFORM 2.; G PROTEIN PATHWAY SUPPRESSOR 1 ISOFORM 1. | AESTPEIAEQR              | K | G | 95.00% | 47  |                | 615.8065  | 2 | 6.8 | 225  | 235  | No |
|     |                          |       |                                                                                      | DIIFK                    | R | F | 95.00% | 28  |                | 635.3814  | 1 | 6.8 | 364  | 368  | No |
|     |                          |       |                                                                                      | EGSQGELTPANSQSR          | R | M | 95.00% | 56  |                | 780.8709  | 2 | 5.5 | 472  | 486  | No |
|     |                          |       |                                                                                      | LFLELEPQVR               | K | D | 95.00% | 39  |                | 622.3596  | 2 | 4.9 | 318  | 327  | No |
| 275 | IPI00157144; IPI00303868 | GPS1  | GYS1 PROTEIN.; GLYCOGEN [STARCH] SYNTHASE, MUSCLE.                                   | AFPEHFITYEPNEADAAQGYR    | K | Y | 95.00% | 65  |                | 771.6860  | 3 | 9.3 | 552  | 571  | No |
|     |                          |       |                                                                                      | FSAMHEFQNLHAQSK          | K | A | 95.00% | 46  | M4: Oxidation  | 895.9219  | 2 | 4.2 | 223  | 237  | No |
|     |                          |       |                                                                                      | FSAMHEFQNLHAQSK          | K | A | 95.00% | 35  | M4: Oxidation  | 597.6184  | 3 | 6.2 | 223  | 237  | No |
|     |                          |       |                                                                                      | GADVFLAALAR              | K | L | 95.00% | 112 |                | 581.3194  | 2 | 3.5 | 274  | 284  | No |
|     |                          |       |                                                                                      | IGLFSNADR                | R | V | 95.00% | 59  |                | 540.2794  | 2 | 2.1 | 399  | 408  | No |
|     |                          |       |                                                                                      | KFSAMHEFQNLHAQSK         | K | A | 95.00% | 41  | M5: Oxidation  | 640.3160  | 3 | 4.7 | 222  | 237  | No |
|     |                          |       |                                                                                      | KLYESLLVGSPLDMNK         | R | M | 95.00% | 75  | M14: Oxidation | 911.9900  | 2 | 5.2 | 339  | 354  | No |
|     |                          |       |                                                                                      | KLYESLLVGSPLDMNK         | R | M | 95.00% | 34  | M14: Oxidation | 608.3287  | 3 | 4.2 | 339  | 354  | No |
|     |                          |       |                                                                                      | KPDIPTPNGLNVK            | R | K | 95.00% | 65  |                | 697.9066  | 2 | 3.2 | 209  | 221  | No |
|     |                          |       |                                                                                      | LPVATIFTTHATLLGR         | R | Y | 95.00% | 102 |                | 856.0027  | 2 | 3.9 | 132  | 147  | No |
|     |                          |       |                                                                                      | LPVATIFTTHATLLGR         | R | Y | 95.00% | 84  |                | 571.0042  | 3 | 3.5 | 132  | 147  | No |
|     |                          |       |                                                                                      | LSDLLDWK                 | R | Y | 95.00% | 35  |                | 989.5361  | 1 | 5.2 | 528  | 535  | No |
|     |                          |       |                                                                                      | LSDLLDWK                 | R | Y | 95.00% | 51  |                | 495.2732  | 2 | 7.6 | 528  | 535  | No |
|     |                          |       |                                                                                      | LYESLLVGSPLDMNK          | K | M | 95.00% | 63  | M13: Oxidation | 847.9415  | 2 | 4.4 | 340  | 354  | No |
|     |                          |       |                                                                                      | QLWDTANTVK               | K | E | 95.00% | 30  |                | 588.3121  | 2 | 8.7 | 324  | 333  | No |
|     |                          |       |                                                                                      | RKPDIVTPNGLNVK           | K | K | 95.00% | 47  |                | 775.9575  | 2 | 3.4 | 208  | 221  | No |
|     |                          |       |                                                                                      | RKPDIVTPNGLNVK           | K | K | 95.00% | 32  |                | 517.6412  | 3 | 3.9 | 208  | 221  | No |
|     |                          |       |                                                                                      | RLPVATIFTTHATLLGR        | R | Y | 95.00% | 96  |                | 623.0392  | 3 | 5.3 | 131  | 147  | No |
|     |                          |       |                                                                                      | RNSVDATSSSLSTPSEPLSPTS   |   |   |        |     |                |           |   |     |      |      |    |
|     |                          |       |                                                                                      | SLGEERN                  | K | - | 95.00% | 53  | S3: Phospho    | 1062.8270 | 3 | 6.5 | 644  | 673  | No |
|     |                          |       |                                                                                      | TLYFFIAGR                | K | Y | 95.00% | 47  |                | 544.3056  | 2 | 8.5 | 259  | 267  | No |
|     |                          |       |                                                                                      | TNNFNVTLK                | R | G | 95.00% | 32  |                | 590.3061  | 2 | 2.8 | 308  | 317  | No |
|     |                          |       |                                                                                      | TQVELLEAPTPALK           | R | R | 95.00% | 85  |                | 755.4355  | 2 | 6.7 | 75   | 88   | No |
|     |                          |       |                                                                                      | TQVELLEAPTPALKR          | R | T | 95.00% | 73  |                | 833.4830  | 2 | 2.4 | 75   | 89   | No |
|     |                          |       |                                                                                      | TQVELLEAPTPALKR          | R | T | 95.00% | 76  |                | 555.9918  | 3 | 3.4 | 75   | 89   | No |
|     |                          |       |                                                                                      | VGGIYTVLQTK              | K | A | 95.00% | 78  |                | 589.8458  | 2 | 4.2 | 40   | 50   | No |
|     |                          |       |                                                                                      | VIFHPEFLSSTSPLLPVDYEEFVR | K | G | 95.00% | 49  |                | 941.1623  | 3 | 9.3 | 411  | 434  | No |
|     |                          |       |                                                                                      | VNGSEQTVVAFFIMPAR        | R | T | 95.00% | 84  | M14: Oxidation | 941.4891  | 2 | 9.0 | 291  | 307  | No |
| 276 | IPI00164623; IPI00783987 | C3    | 187 KDA PROTEIN.; COMPLEMENT C3 PRECURSOR (FRAGMENT).                                | AAVYHHFISDGVR            | K | K | 95.00% | 56  |                | 736.3776  | 2 | 2.0 | 914  | 926  | No |
|     |                          |       |                                                                                      | AGDFLEANYMNLQR           | K | S | 95.00% | 77  | M10: Oxidation | 829.3912  | 2 | 6.2 | 1172 | 1185 | No |
|     |                          |       |                                                                                      | AGDFLEANYMNLQR           | K | S | 95.00% | 48  | M10: Oxidation | 553.2636  | 3 | 6.6 | 1172 | 1185 | No |
|     |                          |       |                                                                                      | AYYENSPQQVFSTEFVK        | R | E | 95.00% | 84  |                | 1083.5160 | 2 | 9.4 | 208  | 225  | No |
|     |                          |       |                                                                                      | DAPDHQELNLDVSLQLPSR      | K | S | 95.00% | 34  |                | 716.3680  | 3 | 6.9 | 1285 | 1303 | No |
|     |                          |       |                                                                                      | DFDFVPPVVR               | K | W | 95.00% | 48  |                | 595.8180  | 2 | 5.9 | 1245 | 1254 | No |
|     |                          |       |                                                                                      | EGVQKEDIPPADLSDQVPDTE    |   |   |        |     |                |           |   |     |      |      |    |
|     |                          |       |                                                                                      | ETR                      | R | I | 95.00% | 91  |                | 919.1057  | 3 | 3.5 | 955  | 979  | No |
|     |                          |       |                                                                                      | EPGQDLVVLPLSITTFIPFSR    | R | L | 95.00% | 31  |                | 815.4487  | 3 | 9.1 | 509  | 530  | No |
|     |                          |       |                                                                                      | EVVADSVMVDVK             | R | D | 95.00% | 65  |                | 673.3599  | 2 | 8.7 | 545  | 556  | No |
|     |                          |       |                                                                                      | GQGTLVWVIMYHAK           | K | A | 95.00% | 57  | M10: Oxidation | 754.3867  | 2 | 5.0 | 1340 | 1353 | No |
|     |                          |       |                                                                                      | GYTQLAFR                 | K | Q | 95.00% | 50  |                | 542.2856  | 2 | 4.3 | 1052 | 1060 | No |
|     |                          |       |                                                                                      | HQQTIVTIPPK              | R | S | 95.00% | 40  |                | 574.8293  | 2 | 6.8 | 882  | 891  | No |
|     |                          |       |                                                                                      | IHWESALLR                | R | S | 95.00% | 43  |                | 404.5583  | 3 | 4.7 | 1311 | 1320 | No |
|     |                          |       |                                                                                      | ILLQGTTPVAQMTEDAVIDAER   | R | L | 95.00% | 114 | M11: Oxidation | 1087.0540 | 2 | 8.2 | 980  | 999  | No |
|     |                          |       |                                                                                      | ILLQGTTPVAQMTEDAVIDAER   | R | L | 95.00% | 53  | M11: Oxidation | 725.0374  | 3 | 7.1 | 980  | 999  | No |
|     |                          |       |                                                                                      | IPIEDGSGEVVLSR           | R | K | 95.00% | 104 |                | 735.8981  | 2 | 5.3 | 291  | 304  | No |
|     |                          |       |                                                                                      | KQELSEAEQATR             | K | T | 95.00% | 52  |                | 695.3575  | 2 | 7.0 | 428  | 439  | No |
|     |                          |       |                                                                                      | KVLLDGVQNPTR             | R | A | 95.00% | 54  |                | 619.8687  | 2 | 5.8 | 305  | 315  | No |
|     |                          |       |                                                                                      | LSINTHPQSOKPLSITVR       | K | T | 95.00% | 39  |                | 631.0333  | 3 | 4.0 | 409  | 425  | No |
|     |                          |       |                                                                                      | LVAYYTLIGASGQR           | R | E | 95.00% | 57  |                | 756.4221  | 2 | 9.3 | 531  | 544  | No |
|     |                          |       |                                                                                      | NTLIYLDK                 | R | V | 95.00% | 34  |                | 546.8213  | 2 | 3.8 | 1442 | 1450 | No |
|     |                          |       |                                                                                      | QKPDGVFQEDAPVIHQEMIGGLR  | K | N | 95.00% | 37  | M18: Oxidation | 645.8318  | 4 | 6.2 | 1112 | 1134 | No |
|     |                          |       |                                                                                      | SEETKENEGFTVAEGK         | R | G | 95.00% | 109 |                | 928.4355  | 2 | 3.7 | 1323 | 1339 | No |

|     |                          |       |                                                            |                          |   |   |        |     |                                                     |           |   |      |      |      |    |
|-----|--------------------------|-------|------------------------------------------------------------|--------------------------|---|---|--------|-----|-----------------------------------------------------|-----------|---|------|------|------|----|
|     |                          |       |                                                            | SEETKENEGFTVTAEGK        | R | G | 95.00% | 50  |                                                     | 619.2930  | 3 | 3.7  | 1321 | 1337 | No |
|     |                          |       |                                                            | SGIPIVTSPYQIHFTK         | R | T | 95.00% | 49  |                                                     | 894.4963  | 2 | 8.5  | 344  | 359  | No |
|     |                          |       |                                                            | SNLDEIIAEEINIVSR         | R | S | 95.00% | 107 |                                                     | 908.9568  | 2 | 7.1  | 749  | 764  | No |
|     |                          |       |                                                            | SNLDEIIAEEINIVSR         | R | S | 95.00% | 69  |                                                     | 606.3067  | 3 | 6.3  | 749  | 764  | No |
|     |                          |       |                                                            | SSLSVPYVIVPLK            | K | T | 95.00% | 43  |                                                     | 701.4260  | 2 | 5.9  | 892  | 904  | No |
|     |                          |       |                                                            | SYTVAIAGYALQMGR          | R | L | 95.00% | 53  | M14: Oxidation                                      | 844.4336  | 2 | 6.9  | 1186 | 1201 | No |
|     |                          |       |                                                            | TELRPGETLNVNFLR          | R | M | 95.00% | 44  |                                                     | 624.6869  | 3 | 5.9  | 463  | 478  | No |
|     |                          |       |                                                            | TGLQEVVVK                | K | A | 95.00% | 44  |                                                     | 501.7787  | 2 | 2.3  | 905  | 913  | No |
|     |                          |       |                                                            | TKKQELSEAEQATR           | R | T | 95.00% | 40  |                                                     | 540.2894  | 3 | 7.5  | 426  | 439  | No |
|     |                          |       |                                                            | TMQALPYSTVGNSNNYLHLSVL   |   |   |        |     |                                                     |           |   |      |      |      |    |
|     |                          |       |                                                            | R                        | R | T | 95.00% | 53  | M2: Oxidation                                       | 865.4445  | 3 | 5.7  | 440  | 462  | No |
|     |                          |       |                                                            | TVMVNIENPEGIPVK          | R | Q | 95.00% | 42  | M3: Oxidation                                       | 828.4436  | 2 | 6.9  | 162  | 176  | No |
|     |                          |       |                                                            | VHQYFNVELIQPGAVK         | K | V | 95.00% | 70  |                                                     | 921.5056  | 2 | 6.4  | 1463 | 1478 | No |
|     |                          |       |                                                            | VHQYFNVELIQPGAVK         | K | V | 95.00% | 44  |                                                     | 614.6723  | 3 | 5.3  | 1463 | 1478 | No |
|     |                          |       |                                                            | VLLDGVQNP                | K | A | 95.00% | 29  |                                                     | 555.8182  | 2 | 1.1  | 306  | 315  | No |
|     |                          |       |                                                            | VPVAVQGEDTVQSLTQGDGVAK   | R | L | 95.00% | 130 |                                                     | 1099.5780 | 2 | 8.4  | 387  | 408  | No |
|     |                          |       |                                                            | VPVAVQGEDTVQSLTQGDGVAK   | R | L | 95.00% | 55  |                                                     | 733.3855  | 3 | 4.8  | 387  | 408  | No |
|     |                          |       |                                                            | VQLSNDFDEYIMAIEQTIK      | K | S | 95.00% | 148 | M12: Oxidation                                      | 1137.0660 | 2 | 10.0 | 1552 | 1570 | No |
|     |                          |       |                                                            | VQLSNDFDEYIMAIEQTIK      | K | S | 95.00% | 63  | M12: Oxidation                                      | 758.3779  | 3 | 7.4  | 1552 | 1570 | No |
|     |                          |       |                                                            | VTIKPAPETEK              | K | R | 95.00% | 30  |                                                     | 404.9018  | 3 | 4.6  | 1367 | 1377 | No |
|     |                          |       |                                                            | YRGDODATMSILDISMMTGFAP   |   |   |        |     |                                                     |           |   |      |      |      |    |
|     |                          |       |                                                            | DTDDLK                   | R | Q | 95.00% | 56  | M9: Oxidation,<br>M16: Oxidation,<br>M17: Oxidation | 1052.4770 | 3 | 9.4  | 1392 | 1419 | No |
|     |                          |       |                                                            | YYGGYGSTQATFMVFQALAQY    |   |   |        |     |                                                     |           |   |      |      |      |    |
|     |                          |       |                                                            | QK                       | R | D | 95.00% | 59  | M14: Oxidation                                      | 899.0958  | 3 | 8.1  | 1261 | 1284 | No |
| 277 | IPI00168081; IPI00784073 | SMYD1 | 57 KDA PROTEIN.; SET AND MYND DOMAIN-CONTAINING PROTEIN 1. | AYAILLVTHGSPHPITK        | K | D | 95.00% | 109 |                                                     | 909.5248  | 2 | 7.4  | 419  | 435  | No |
|     |                          |       |                                                            | AYAILLVTHGSPHPITK        | K | D | 95.00% | 61  |                                                     | 606.6841  | 3 | 4.6  | 419  | 435  | No |
|     |                          |       |                                                            | AYAILLVTHGSPHPITK        | K | D | 95.00% | 40  |                                                     | 455.2658  | 4 | 6.2  | 419  | 435  | No |
|     |                          |       |                                                            | EALNNQPMQVMAEPSNEPSP     |   |   |        |     |                                                     |           |   |      |      |      |    |
|     |                          |       |                                                            | ALFHK                    | R | K | 95.00% | 90  | M9: Oxidation,<br>M12: Oxidation                    | 961.4626  | 3 | 9.5  | 466  | 491  | No |
|     |                          |       |                                                            | EFWAADIIFAE              | K | A | 95.00% | 84  |                                                     | 734.3729  | 2 | 7.2  | 26   | 37   | No |
|     |                          |       |                                                            | ISEGEELTVSYIDFLNVSEER    | K | K | 95.00% | 125 |                                                     | 1215.1000 | 2 | 7.9  | 242  | 262  | No |
|     |                          |       |                                                            | KLKDDLFLGVK              | K | D | 95.00% | 55  |                                                     | 638.3933  | 2 | 8.4  | 282  | 292  | No |
|     |                          |       |                                                            | KLKDDLFLGVK              | K | D | 95.00% | 53  |                                                     | 425.9289  | 3 | 2.4  | 282  | 292  | No |
|     |                          |       |                                                            | LKDDLFLGVK               | K | D | 95.00% | 46  |                                                     | 574.3414  | 2 | 1.7  | 283  | 292  | No |
|     |                          |       |                                                            | LYHPNNAQLGMVMR           | K | A | 95.00% | 48  | M11: Oxidation,<br>M14: Oxidation                   | 873.9313  | 2 | 7.4  | 384  | 398  | No |
|     |                          |       |                                                            | LYHPNNAQLGMVMR           | K | A | 95.00% | 52  | M11: Oxidation,<br>M14: Oxidation                   | 582.9546  | 3 | 3.6  | 384  | 398  | No |
|     |                          |       |                                                            | MENVEVFTAEGK             | R | G | 95.00% | 47  | M1: Oxidation                                       | 685.3217  | 2 | 3.4  | 6    | 17   | No |
|     |                          |       |                                                            | QEPVFADTNIYMLR           | K | M | 95.00% | 62  | M12: Oxidation                                      | 856.9281  | 2 | 9.7  | 339  | 352  | No |
|     |                          |       |                                                            | QEPVFADTNIYMLR           | K | M | 95.00% | 41  | M12: Oxidation                                      | 571.6193  | 3 | 6.2  | 339  | 352  | No |
|     |                          |       |                                                            | SEGLYHEVVK               | R | L | 95.00% | 66  |                                                     | 580.8041  | 2 | 4.3  | 321  | 330  | No |
|     |                          |       |                                                            | VQTEMLR                  | R | M | 95.00% | 42  | M5: Oxidation                                       | 511.2561  | 2 | 5.3  | 445  | 452  | No |
|     |                          |       |                                                            | AEPAKIEAFR               | K | A | 95.00% | 59  |                                                     | 566.3130  | 2 | 1.6  | 142  | 151  | No |
|     |                          |       |                                                            | AHSSMVGVNLPQK            | R | A | 95.00% | 84  | M5: Oxidation                                       | 692.3569  | 2 | 0.4  | 172  | 184  | No |
|     |                          |       |                                                            | AHSSMVGVNLPQK            | R | A | 95.00% | 50  | M5: Oxidation                                       | 461.9099  | 3 | 6.3  | 172  | 184  | No |
|     |                          |       |                                                            | AHSSMVGVNLPQK            | R | A | 95.00% | 57  |                                                     | 684.3634  | 2 | 6.2  | 172  | 184  | No |
|     |                          |       |                                                            | AHSSMVGVNLPQK            | R | A | 95.00% | 41  |                                                     | 456.5756  | 3 | 0.4  | 172  | 184  | No |
|     |                          |       |                                                            | ALESPERPFLLAILGGAK       | K | V | 95.00% | 84  |                                                     | 885.0073  | 2 | 5.8  | 200  | 216  | No |
|     |                          |       |                                                            | ALESPERPFLLAILGGAK       | K | V | 95.00% | 64  |                                                     | 590.3392  | 3 | 3.1  | 200  | 216  | No |
|     |                          |       |                                                            | ALMDEVVK                 | K | A | 95.00% | 55  | M3: Oxidation                                       | 460.7427  | 2 | 1.2  | 354  | 361  | No |
|     |                          |       |                                                            | ALMDEVVK                 | K | A | 95.00% | 35  |                                                     | 452.7463  | 2 | 3.6  | 354  | 361  | No |
|     |                          |       |                                                            | DVLFLK                   | K | D | 95.00% | 34  |                                                     | 734.4485  | 1 | 4.2  | 92   | 97   | No |
|     |                          |       |                                                            | ELNYFAK                  | K | A | 95.00% | 33  |                                                     | 884.4600  | 1 | 9.2  | 193  | 199  | No |
|     |                          |       |                                                            | FHVVEEGK                 | R | G | 95.00% | 33  |                                                     | 487.7369  | 2 | 8.0  | 124  | 131  | No |
|     |                          |       |                                                            | FHVVEEGK                 | R | D | 95.00% | 40  |                                                     | 580.2921  | 2 | 1.4  | 124  | 133  | No |
|     |                          |       |                                                            | IQLINNMLDK               | K | V | 95.00% | 33  | M7: Oxidation                                       | 1217.6610 | 1 | 4.0  | 221  | 230  | No |
|     |                          |       |                                                            | IQLINNMLDK               | K | V | 95.00% | 59  | M7: Oxidation                                       | 609.3342  | 2 | 3.3  | 221  | 230  | No |
|     |                          |       |                                                            | IQLINNMLDK               | K | V | 95.00% | 57  |                                                     | 601.3370  | 2 | 3.8  | 221  | 230  | No |
|     |                          |       |                                                            | IQLINNMLDKVNEMIIIGGMAFTF |   |   |        |     |                                                     |           |   |      |      |      |    |
|     |                          |       |                                                            | LK                       | K | V | 95.00% | 35  | M7: Oxidation,<br>M14: Oxidation,<br>M20: Oxidation | 986.8494  | 3 | 6.2  | 221  | 246  | No |
|     |                          |       |                                                            | ITLPVDFVTADKFDENAK       | K | T | 95.00% | 132 |                                                     | 1012.0330 | 2 | 9.6  | 280  | 297  | No |
|     |                          |       |                                                            | ITLPVDFVTADKFDENAK       | K | T | 95.00% | 66  |                                                     | 675.0224  | 3 | 6.3  | 280  | 297  | No |
|     |                          |       |                                                            | LGDVYVNDAFGTAHR          | K | A | 95.00% | 117 |                                                     | 817.9061  | 2 | 7.1  | 157  | 171  | No |
|     |                          |       |                                                            | LGDVYVNDAFGTAHR          | K | A | 95.00% | 85  |                                                     | 545.6070  | 3 | 7.6  | 157  | 171  | No |

ISOFORM 1 OF ADENYLOSUCCINATE  
SYNTHETASE ISOZYME 1.

|                          |   |   |        |     |                                   |           |   |      |     |     |    |
|--------------------------|---|---|--------|-----|-----------------------------------|-----------|---|------|-----|-----|----|
| LTLDKLDVK                | K | G | 95.00% | 46  |                                   | 522.8218  | 2 | 4.7  | 7   | 15  | No |
| NNQITNNQR                | K | I | 95.00% | 33  |                                   | 551.2781  | 2 | 7.5  | 31  | 39  | No |
| PDGVMPDPKYSLEPVAVELK     | R | S | 95.00% | 33  | M6: Oxidation                     | 734.0520  | 3 | 8.7  | 67  | 86  | No |
| PFLAILGGAK               | R | V | 95.00% | 60  |                                   | 493.8100  | 2 | 8.2  | 207 | 216 | No |
| QIVWNGPVGVFEWEAFAR       | K | G | 95.00% | 129 |                                   | 1053.0450 | 2 | 9.9  | 333 | 350 | No |
| QIVWNGPVGVFEWEAFAR       | K | G | 95.00% | 59  |                                   | 702.3635  | 3 | 6.7  | 333 | 350 | No |
| SLLGKDVFLK               | K | D | 95.00% | 41  |                                   | 616.8878  | 2 | 4.7  | 87  | 97  | No |
| SLLGKDVFLK               | K | D | 95.00% | 32  |                                   | 411.5919  | 3 | -1.5 | 87  | 97  | No |
| SVVLMShLGRPDGVPMPDK      | K | Y | 95.00% | 37  | M16: Oxidation                    | 684.3558  | 3 | 4.8  | 57  | 75  | No |
| SVVLMShLGRPDGVPMPDK      | K | Y | 95.00% | 34  | M5: Oxidation,<br>M16: Oxidation  | 689.6885  | 3 | 6.3  | 57  | 75  | No |
| SVVLMShLGRPDGVPMPDKYSL   | K | Y | 95.00% | 34  | M5: Oxidation,<br>M16: Oxidation  | 1099.2510 | 3 | 9.0  | 57  | 86  | No |
| EPVAVELK                 | K | S | 95.00% | 50  |                                   | 815.9503  | 2 | 5.3  | 217 | 230 | No |
| VADKIQLINMLDK            | K | V | 95.00% | 80  | M11: Oxidation                    | 544.3022  | 3 | 4.3  | 217 | 230 | No |
| VADKIQLINMLDK            | K | V | 95.00% | 36  | M11: Oxidation                    |           |   |      |     |     |    |
| VADKIQLINMLDKVNEMIIGGG   | K | V | 95.00% | 38  | M18: Oxidation,<br>M24: Oxidation | 843.6982  | 4 | 8.3  | 217 | 246 | No |
| MAFTFLK                  | K | V | 95.00% | 38  | M7: Oxidation                     | 965.4813  | 1 | 4.8  | 23  | 30  | No |
| VDFNVPMK                 | R | N | 95.00% | 32  | M7: Oxidation                     | 483.2447  | 2 | 5.0  | 23  | 30  | No |
| VDFNVPMK                 | R | N | 95.00% | 53  |                                   | 475.2458  | 2 | 2.1  | 23  | 30  | No |
| VDFNVPMK                 | R | N | 95.00% | 36  |                                   | 679.8961  | 2 | 3.5  | 140 | 151 | No |
| VKAEPKIEAFR              | K | A | 95.00% | 50  |                                   | 991.9822  | 2 | 9.2  | 247 | 264 | No |
| VLNNMEIGTSLFDEEGAK       | K | I | 95.00% | 115 | M5: Oxidation                     | 661.6550  | 3 | 5.7  | 247 | 264 | No |
| VLNNMEIGTSLFDEEGAK       | K | I | 95.00% | 61  | M5: Oxidation                     | 983.9847  | 2 | 9.3  | 247 | 264 | No |
| VLNNMEIGTSLFDEEGAK       | K | I | 95.00% | 92  |                                   | 1097.6290 | 1 | 7.1  | 407 | 417 | No |
| VLPGVDAISNI              | K | - | 95.00% | 35  |                                   | 549.3152  | 2 | 1.6  | 407 | 417 | No |
| VLPGVDAISNI              | K | - | 95.00% | 68  |                                   |           |   |      |     |     |    |
| VNEMIIGGGMAFTFLK         | K | V | 95.00% | 79  | M4: Oxidation,<br>M10: Oxidation  | 880.4496  | 2 | 8.6  | 231 | 246 | No |
| VNEMIIGGGMAFTFLK         | K | V | 95.00% | 78  | M4: Oxidation,<br>M10: Oxidation  | 587.3025  | 3 | 8.8  | 231 | 246 | No |
| VSHVSTGGASLELLEGGK       | K | V | 95.00% | 141 |                                   | 870.9640  | 2 | 3.9  | 389 | 406 | No |
| VSHVSTGGASLELLEGGK       | K | V | 95.00% | 50  |                                   | 580.9791  | 3 | 4.8  | 389 | 406 | No |
| WNTEDKVSHVSTGGASLELLEGGK | K | V | 95.00% | 82  |                                   | 838.7604  | 3 | 7.2  | 383 | 406 | No |
| YAEAVTR                  | K | A | 95.00% | 45  |                                   | 405.2141  | 2 | 5.8  | 324 | 330 | No |
| YSLEPVAVELK              | K | S | 95.00% | 39  |                                   | 1247.6890 | 1 | 0.4  | 76  | 86  | No |
| YSLEPVAVELK              | K | S | 95.00% | 76  |                                   | 624.3534  | 2 | 8.1  | 76  | 86  | No |
| AHLVDFHQAVDGLQEVQR       | R | Q | 95.00% | 96  |                                   | 1105.0690 | 2 | 6.5  | 134 | 152 | No |
| AHLVDFHQAVDGLQEVQR       | R | Q | 95.00% | 81  |                                   | 737.0491  | 3 | 7.4  | 134 | 152 | No |
| AHLVDFHQAVDGLQEVQR       | R | Q | 95.00% | 32  |                                   | 553.0376  | 4 | 5.2  | 134 | 152 | No |
| AVSFIGNGVVIHLPLGFEEAEK   | K | N | 95.00% | 32  |                                   | 776.0941  | 3 | 9.4  | 94  | 115 | No |
| AVSFIGNGVVIHLPLGFEEAEKN  | K | N | 95.00% | 32  |                                   |           |   |      |     |     |    |
| EK                       | K | K | 95.00% | 54  |                                   | 899.8224  | 3 | 9.8  | 94  | 118 | No |
| DGVYFMYEALHGPPK          | R | K | 95.00% | 55  | M6: Oxidation                     | 870.4142  | 2 | 5.8  | 234 | 248 | No |
| EYDFHLLPSGIINTK          | K | A | 95.00% | 69  |                                   | 873.9642  | 2 | 7.8  | 79  | 93  | No |
| EYDFHLLPSGIINTK          | K | A | 95.00% | 52  |                                   | 582.9799  | 3 | 9.8  | 79  | 93  | No |
| FVENHVGVAVK              | R | W | 95.00% | 59  |                                   | 599.8372  | 2 | 6.7  | 432 | 442 | No |
| FVENHVGVAVK              | R | W | 95.00% | 28  |                                   | 400.2262  | 3 | 3.9  | 432 | 442 | No |
| GHEWGVTTGR               | R | K | 95.00% | 54  |                                   | 550.2709  | 2 | 4.9  | 326 | 335 | No |
| IPYFPANQEMLQK            | R | V | 95.00% | 47  | M10: Oxidation                    | 797.9050  | 2 | 5.0  | 386 | 398 | No |
| LDILDVLGEVK              | K | V | 95.00% | 109 |                                   | 607.3601  | 2 | 6.2  | 364 | 374 | No |
| NLAHQHQSMFPTLEIDIEGQLKR  | K | L | 95.00% | 31  | M9: Oxidation                     | 907.8049  | 3 | 7.6  | 198 | 220 | No |
| NLAHQHQSMFPTLEIDIEGQLKR  | K | L | 95.00% | 47  | M9: Oxidation                     | 681.1047  | 4 | 6.4  | 198 | 220 | No |
| RIPYFPANQEMLQK           | K | V | 95.00% | 48  | M11: Oxidation                    | 875.9597  | 2 | 9.3  | 385 | 398 | No |
| RIPYFPANQEMLQK           | K | V | 95.00% | 54  | M11: Oxidation                    | 584.3055  | 3 | 3.3  | 385 | 398 | No |
| RWEDLPPQAQNYIR           | R | F | 95.00% | 58  |                                   | 893.4630  | 2 | 8.0  | 418 | 431 | No |
| RWEDLPPQAQNYIR           | R | F | 95.00% | 55  |                                   | 595.9774  | 3 | 7.1  | 418 | 431 | No |
| VEVEYETLPGWK             | K | A | 95.00% | 75  |                                   | 725.3718  | 2 | 6.1  | 399 | 410 | No |
| YGIGAFPTEQINEIGLLQTR     | R | G | 95.00% | 121 |                                   | 1107.1090 | 2 | 7.7  | 305 | 325 | No |
| YGIGAFPTEQINEIGLLQTR     | R | G | 95.00% | 72  |                                   | 738.4080  | 3 | 6.7  | 305 | 325 | No |
| VTVVLGAQWGDEGK           | R | G | 95.00% | 109 |                                   | 729.8902  | 2 | 9.0  | 33  | 46  | No |
| VTVVLGAQWGDEGK           | R | V | 95.00% | 72  |                                   | 822.4472  | 2 | 6.5  | 33  | 48  | No |
| VTVVLGAQWGDEGK           | R | V | 95.00% | 34  |                                   | 548.6340  | 3 | 6.5  | 33  | 48  | No |
| VVDLLATDADIISR           | K | C | 95.00% | 110 |                                   | 750.9233  | 2 | 7.6  | 49  | 62  | No |
| VVDLLATDADIISR           | K | C | 95.00% | 93  |                                   | 500.9495  | 3 | 3.6  | 49  | 62  | No |
| WEDLPPQAQNYIR            | R | F | 95.00% | 45  |                                   | 815.4078  | 2 | 3.1  | 419 | 431 | No |

|          |                                                    |          |                                                                                                                                                                                                                                                                |                         |   |          |        |     |                |           |    |     |      |      |    |
|----------|----------------------------------------------------|----------|----------------------------------------------------------------------------------------------------------------------------------------------------------------------------------------------------------------------------------------------------------------|-------------------------|---|----------|--------|-----|----------------|-----------|----|-----|------|------|----|
| 280      | IPI00170935                                        | LRRC47   | LEUCINE-RICH REPEAT-CONTAINING PROTEIN 47.                                                                                                                                                                                                                     | YAHMVNGFTALALTK         | R | L        | 95.00% | 40  | M4: Oxidation  | 551.6235  | 3  | 4.7 | 349  | 363  | No |
|          |                                                    |          |                                                                                                                                                                                                                                                                | ADLATAPPHVTVVR          | K | -        | 95.00% | 41  |                | 723.9108  | 2  | 4.7 | 570  | 583  | No |
|          |                                                    |          |                                                                                                                                                                                                                                                                | ADLATAPPHVTVVR          | K | -        | 95.00% | 28  |                | 482.9429  | 3  | 4.3 | 570  | 583  | No |
|          |                                                    |          |                                                                                                                                                                                                                                                                | APGPGLAQLPQLHSLVLR      | R | R        | 95.00% | 33  |                | 642.0461  | 3  | 4.8 | 65   | 83   | No |
|          |                                                    |          |                                                                                                                                                                                                                                                                | ELLLTGPGLER             | R | V        | 95.00% | 61  |                | 663.8718  | 2  | 6.4 | 23   | 34   | No |
|          |                                                    |          |                                                                                                                                                                                                                                                                | NALGPGLSPELGPLPALR      | R | V        | 95.00% | 77  |                | 886.5146  | 2  | 7.9 | 85   | 102  | No |
|          |                                                    |          |                                                                                                                                                                                                                                                                | SILEYLR                 | R | V        | 95.00% | 29  |                | 447.2598  | 2  | 2.3 | 253  | 259  | No |
|          |                                                    |          |                                                                                                                                                                                                                                                                | TAATLATHELR             | R | A        | 95.00% | 84  |                | 592.3290  | 2  | 5.6 | 371  | 381  | No |
|          |                                                    |          |                                                                                                                                                                                                                                                                | VLHVSENPVPLTVR          | R | V        | 95.00% | 56  |                | 780.4542  | 2  | 6.2 | 311  | 324  | No |
| 281      | IPI00171199; IPI00419249                           | PSMA3    | ISOFORM 2 OF PROTEASOME SUBUNIT ALPHA TYPE 3.; ISOFORM 1 OF PROTEASOME SUBUNIT ALPHA TYPE 3.                                                                                                                                                                   | AVENSSTAIGIR            | K | C        | 95.00% | 36  |                | 609.3321  | 2  | 6.0 | 30   | 41   | No |
|          |                                                    |          |                                                                                                                                                                                                                                                                | IIVIVHDEVK              | K | D        | 95.00% | 34  |                | 614.8565  | 2  | 8.8 | 190  | 199  | No |
|          |                                                    |          |                                                                                                                                                                                                                                                                | SNFGYNIPLK              | R | H        | 95.00% | 57  |                | 576.8107  | 2  | 7.0 | 101  | 110  | No |
| 282      | IPI00171573; IPI00185975                           | CCDC109A | COILED-COIL DOMAIN CONTAINING 109A.; CCDC109A PROTEIN.                                                                                                                                                                                                         | DLLSHENAATLNDVK         | R | T        | 95.00% | 69  |                | 820.4255  | 2  | 8.6 | 166  | 180  | No |
|          |                                                    |          |                                                                                                                                                                                                                                                                | LEDLKEQLAPLEK           | R | V        | 95.00% | 36  |                | 509.2922  | 3  | 8.4 | 207  | 219  | No |
|          |                                                    |          |                                                                                                                                                                                                                                                                | LRDPLQVHLPLR            | R | Q        | 95.00% | 54  |                | 486.3000  | 3  | 5.9 | 334  | 345  | No |
|          |                                                    |          |                                                                                                                                                                                                                                                                | VAIYSPDGVR              | R | V        | 95.00% | 34  |                | 538.7944  | 2  | 6.5 | 125  | 134  | No |
| 283      | IPI00171761; IPI00171769; IPI00552881              | FUNDC2   | 21 KDA PROTEIN.; FUN14 DOMAIN CONTAINING 2.; FUN14 DOMAIN CONTAINING 2.                                                                                                                                                                                        | AEEVVSFVK               | K | K        | 95.00% | 55  |                | 504.2796  | 2  | 9.9 | 162  | 170  | No |
|          |                                                    |          |                                                                                                                                                                                                                                                                | KLFGQESGSAEK            | R | Y        | 95.00% | 48  |                | 689.3603  | 2  | 8.2 | 68   | 80   | No |
|          |                                                    |          |                                                                                                                                                                                                                                                                | LFGQESGSAEK             | K | Y        | 95.00% | 72  |                | 625.3107  | 2  | 5.7 | 69   | 80   | No |
|          |                                                    |          |                                                                                                                                                                                                                                                                | SKAEEVVSFVK             | R | K        | 95.00% | 30  |                | 408.2312  | 3  | 8.0 | 160  | 170  | No |
|          |                                                    |          |                                                                                                                                                                                                                                                                | ADAADQAALAAR            | K | Q        | 95.00% | 64  |                | 572.2938  | 2  | 3.3 | 388  | 399  | No |
| 284      | IPI00173461                                        | JPH1     | JUNCTOPHILIN-1.                                                                                                                                                                                                                                                | AKADAADQAALAAR          | R | Q        | 95.00% | 90  |                | 671.8617  | 2  | 5.6 | 386  | 399  | No |
|          |                                                    |          |                                                                                                                                                                                                                                                                | ELSPDFYQPGPDYVK         | R | Q        | 95.00% | 79  |                | 877.9223  | 2  | 5.0 | 411  | 425  | No |
|          |                                                    |          |                                                                                                                                                                                                                                                                | QSVPYGMATVIR            | R | S        | 95.00% | 82  | M7: Oxidation  | 669.3497  | 2  | 2.1 | 145  | 156  | No |
|          |                                                    |          |                                                                                                                                                                                                                                                                | SVADEQVTAIVNKPLMSK      | R | A        | 95.00% | 31  | M16: Oxidation | 973.5242  | 2  | 7.0 | 500  | 517  | No |
|          |                                                    |          |                                                                                                                                                                                                                                                                | HQPYQLNASLFTFQPPDAK     | K | D        | 95.00% | 38  |                | 734.7083  | 3  | 5.0 | 967  | 985  | No |
|          |                                                    |          |                                                                                                                                                                                                                                                                | IAQPSYPPARPASTLNVAGPFK  | K | G        | 95.00% | 26  |                | 761.4221  | 3  | 9.1 | 808  | 829  | No |
| 285      | IPI00173549; IPI00735855; IPI00737694; IPI00742098 | SYNPO2   | SYNAPTOPODIN 2.; SYNAPTOPODIN-2.; SIMILAR TO SYNAPTOPODIN 2 ISOFORM 3.; SIMILAR TO SYNAPTOPODIN 2 ISOFORM 2.                                                                                                                                                   | PASTLNVAGPFK            | R | G        | 95.00% | 41  |                | 601.3367  | 2  | 6.2 | 818  | 829  | No |
|          |                                                    |          |                                                                                                                                                                                                                                                                | QESASSSYFVAPR           | K | P        | 95.00% | 52  |                | 714.8475  | 2  | 7.9 | 1059 | 1071 | No |
|          |                                                    |          |                                                                                                                                                                                                                                                                | TAKPPFGSVNQPATPFSPTR    | R | N        | 95.00% | 45  |                | 700.7076  | 3  | 9.1 | 588  | 607  | No |
|          |                                                    |          |                                                                                                                                                                                                                                                                | VSPNPELLSLQNSEK         | K | R        | 95.00% | 119 |                | 912.9939  | 2  | 5.0 | 704  | 720  | No |
|          |                                                    |          |                                                                                                                                                                                                                                                                | YVVDSDTVQAHAAAR         | K | A        | 95.00% | 34  |                | 511.2583  | 3  | 5.7 | 886  | 899  | No |
|          |                                                    |          |                                                                                                                                                                                                                                                                | ALQSTAVEQIGMFLGK        | R | V        | 95.00% | 58  | M12: Oxidation | 570.3090  | 3  | 9.8 | 42   | 57   | No |
|          |                                                    |          |                                                                                                                                                                                                                                                                | ALQSTAVEQIGMFLGK        | R | V        | 95.00% | 63  |                | 846.9589  | 2  | 6.1 | 42   | 57   | No |
|          |                                                    |          |                                                                                                                                                                                                                                                                | AVLGSSPFLSEANAER        | K | I        | 95.00% | 122 |                | 824.4258  | 2  | 5.9 | 195  | 210  | No |
|          |                                                    |          |                                                                                                                                                                                                                                                                | DKLEYFEERPFAAASIGQVHLAR | R | M        | 95.00% | 59  |                | 883.1349  | 3  | 9.9 | 274  | 296  | No |
|          |                                                    |          |                                                                                                                                                                                                                                                                | DKLEYFEERPFAAASIGQVHLAR | R | M        | 95.00% | 41  |                | 662.6013  | 4  | 7.0 | 274  | 296  | No |
|          |                                                    |          |                                                                                                                                                                                                                                                                | EAGFPGQASSPLGR          | R | A        | 95.00% | 58  |                | 687.3482  | 2  | 5.2 | 127  | 140  | No |
| FLTGVEVK | K                                                  | V        | 95.00%                                                                                                                                                                                                                                                         | 31                      |   | 478.7604 | 2      | 3.8 | 546            | 553       | No |     |      |      |    |
| 286      | IPI00176469; IPI00641178; IPI00644715; IPI00645029 | CABC1    | ISOFORM 1 OF CHAPERONE-ACTIVITY OF BC1 COMPLEX-LIKE, MITOCHONDRIALPRECURSOR.; ISOFORM 3 OF CHAPERONE-ACTIVITY OF BC1 COMPLEX-LIKE, MITOCHONDRIALPRECURSOR.; CHAPERONE, ABC1 ACTIVITY OF BC1 COMPLEX HOMOLOG.; CHAPERONE, ABC1 ACTIVITY OF BC1 COMPLEX HOMOLOG. | IHNLIPIVMLR             | K | H        | 95.00% | 36  | M8: Oxidation  | 611.3641  | 2  | 5.0 | 587  | 596  | No |
|          |                                                    |          |                                                                                                                                                                                                                                                                | KAVLGSSPFLSEANAER       | K | I        | 95.00% | 109 |                | 888.4742  | 2  | 6.5 | 246  | 262  | No |
|          |                                                    |          |                                                                                                                                                                                                                                                                | LANFGLAVLGLFGALAEVAK    | R | K        | 95.00% | 139 |                | 988.0641  | 2  | 9.4 | 162  | 182  | No |
|          |                                                    |          |                                                                                                                                                                                                                                                                | LANFGLAVLGLFGALAEVAK    | R | K        | 95.00% | 101 |                | 659.0440  | 3  | 7.3 | 162  | 182  | No |
|          |                                                    |          |                                                                                                                                                                                                                                                                | LANFGLAVLGLFGALAEVAKK   | R | S        | 95.00% | 64  |                | 701.7436  | 3  | 8.8 | 214  | 235  | No |
|          |                                                    |          |                                                                                                                                                                                                                                                                | LGQMLSQDDAFINPHLAK      | K | I        | 95.00% | 106 | M4: Oxidation  | 1064.0580 | 2  | 8.0 | 225  | 243  | No |
|          |                                                    |          |                                                                                                                                                                                                                                                                | LGQMLSQDDAFINPHLAK      | K | I        | 95.00% | 79  | M4: Oxidation  | 709.7084  | 3  | 8.7 | 277  | 295  | No |
|          |                                                    |          |                                                                                                                                                                                                                                                                | SFTDLYIQIIR             | R | A        | 95.00% | 73  |                | 684.8854  | 2  | 7.3 | 465  | 475  | No |
|          |                                                    |          |                                                                                                                                                                                                                                                                | TLNNDLGNWR              | K | D        | 95.00% | 63  |                | 650.3289  | 2  | 4.0 | 315  | 325  | No |
|          |                                                    |          |                                                                                                                                                                                                                                                                | VALLDFGATR              | K | E        | 95.00% | 33  |                | 1062.6040 | 1  | 8.3 | 503  | 512  | No |
| 287      | IPI00176532                                        | JPH2     | ISOFORM 1 OF JUNCTOPHILIN-2.                                                                                                                                                                                                                                   | VALLDFGATR              | K | E        | 95.00% | 83  |                | 531.8034  | 2  | 3.8 | 503  | 512  | No |
|          |                                                    |          |                                                                                                                                                                                                                                                                | AEEAAEQAAALANQESNIAR    | K | T        | 95.00% | 102 |                | 964.4835  | 2  | 6.2 | 398  | 416  | No |

|     |             |      |                                                                        |                         |   |   |        |     |                |           |   |      |     |     |     |
|-----|-------------|------|------------------------------------------------------------------------|-------------------------|---|---|--------|-----|----------------|-----------|---|------|-----|-----|-----|
|     |             |      |                                                                        | AKAEAAEQAALANQESNIAR    | K | T | 95.00% | 54  |                | 709.7004  | 3 | 2.9  | 396 | 416 | No  |
|     |             |      |                                                                        | ELAPDFYQPGPEYQK         | R | R | 95.00% | 44  |                | 891.4319  | 2 | 9.5  | 421 | 435 | No  |
|     |             |      |                                                                        | GGFALSLLANAAEAR         | R | A | 95.00% | 72  |                | 766.4188  | 2 | 4.1  | 198 | 213 | No  |
|     |             |      |                                                                        | LLQEILNSESLLPPDR        | R | G | 95.00% | 57  |                | 699.0407  | 3 | 6.5  | 438 | 455 | No  |
|     |             |      |                                                                        | MAIEALQAPPAPSREPEVALYQ  |   |   |        |     |                |           |   |      |     |     |     |
|     |             |      |                                                                        | GYHSYAVR                | R | T | 95.00% | 83  | M1: Oxidation  | 1110.9000 | 3 | 8.0  | 543 | 572 | No  |
|     |             |      |                                                                        | QSVPYGMVVVR             | R | S | 95.00% | 61  | M7: Oxidation  | 661.3560  | 2 | 7.9  | 145 | 156 | No  |
| 288 | IPI00176903 | PTRF | ISOFORM 1 OF POLYMERASE I AND TRANSCRIPT RELEASE FACTOR.               | ATEMVEVGADDDEGGAER      | K | G | 95.00% | 132 | M4: Oxidation  | 933.8901  | 2 | 3.1  | 338 | 355 | No  |
|     |             |      |                                                                        | ATEMVEVGADDDEGGAERGEA   |   |   |        |     |                |           |   |      |     |     |     |
|     |             |      |                                                                        | GDLR                    | K | R | 95.00% | 55  | M4: Oxidation  | 855.7086  | 3 | 3.4  | 338 | 362 | No  |
|     |             |      |                                                                        | IIGAVDQIQLTQAQLEER      | K | Q | 95.00% | 140 |                | 1013.0610 | 2 | 7.4  | 61  | 78  | No  |
|     |             |      |                                                                        | IIGAVDQIQLTQAQLEER      | K | Q | 95.00% | 74  |                | 675.7079  | 3 | 4.8  | 61  | 78  | No  |
|     |             |      |                                                                        | KLEVNEAELLR             | K | R | 95.00% | 63  |                | 657.3771  | 2 | 2.6  | 137 | 147 | No  |
|     |             |      |                                                                        | KLEVNEAELLR             | K | R | 95.00% | 55  |                | 438.5873  | 3 | 2.5  | 137 | 147 | No  |
|     |             |      |                                                                        | KSFTPDHVVYAR            | R | S | 95.00% | 49  |                | 710.3751  | 2 | 2.8  | 299 | 310 | No  |
|     |             |      |                                                                        | LEVNEAELLR              | K | R | 95.00% | 70  |                | 593.3309  | 2 | 5.0  | 138 | 147 | No  |
|     |             |      |                                                                        | MEKTK                   | K | V | 95.00% | 24  | M1: Oxidation  | 652.3343  | 1 | 0.4  | 241 | 245 | No  |
|     |             |      |                                                                        | QAEMEGAVQSIQGELSK       | R | L | 95.00% | 98  | M4: Oxidation  | 910.9468  | 2 | 8.5  | 79  | 95  | No  |
|     |             |      |                                                                        | QAEMEGAVQSIQGELSK       | R | L | 95.00% | 48  |                | 902.9349  | 2 | -7.4 | 79  | 95  | No  |
|     |             |      |                                                                        | SDQVNGVLVLSLLDK         | K | I | 95.00% | 114 |                | 800.4590  | 2 | 8.9  | 46  | 60  | No  |
|     |             |      |                                                                        | SFTPDHVVYAR             | K | S | 95.00% | 53  |                | 646.3262  | 2 | 0.9  | 300 | 310 | No  |
|     |             |      |                                                                        | VMIIYQDEVKLPKAK         | K | L | 95.00% | 53  | M2: Oxidation  | 775.4219  | 2 | 3.7  | 153 | 165 | No  |
|     |             |      | ISOFORM SERCA2A OF SARCOPLASMIC/ENDOPLASMIC RETICULUM CALCIUM ATPASE2. | AEIGIAMGSGTAVAK         | K | T | 95.00% | 109 | M7: Oxidation  | 696.3662  | 2 | 2.9  | 713 | 727 | Yes |
|     |             |      |                                                                        | AEIGIAMGSGTAVAK         | K | T | 95.00% | 94  |                | 688.3702  | 2 | 5.1  | 713 | 727 | Yes |
|     |             |      |                                                                        | AFTGREFDELNPSAQR        | K | D | 95.00% | 43  |                | 919.4520  | 2 | 7.0  | 651 | 666 | No  |
|     |             |      |                                                                        | AKDIVPGDIVEIIVGDK       | K | V | 95.00% | 41  |                | 869.9888  | 2 | 6.0  | 142 | 158 | No  |
|     |             |      |                                                                        | AKDIVPGDIVEIIVGDK       | K | V | 95.00% | 50  |                | 580.3287  | 3 | 6.3  | 142 | 158 | No  |
|     |             |      |                                                                        | AKDIVPGDIVEIIVGDKVPADIR | K | L | 95.00% | 54  |                | 797.4560  | 3 | 9.5  | 142 | 164 | No  |
|     |             |      |                                                                        | AKDIVPGDIVEIIVGDKVPADIR | K | L | 95.00% | 57  |                | 598.3425  | 4 | 6.9  | 142 | 164 | No  |
|     |             |      |                                                                        | AMGVVAVTGVNTEIGK        | K | I | 95.00% | 108 | M2: Oxidation  | 781.4196  | 2 | 3.4  | 219 | 234 | No  |
|     |             |      |                                                                        | AMGVVAVTGVNTEIGK        | K | I | 95.00% | 62  | M2: Oxidation  | 521.2828  | 3 | 4.3  | 219 | 234 | No  |
|     |             |      |                                                                        | DIVPGDIVEIIVGDK         | K | V | 95.00% | 118 |                | 770.4250  | 2 | 9.7  | 144 | 158 | No  |
|     |             |      |                                                                        | DIVPGDIVEIIVGDKVPADIR   | K | L | 95.00% | 106 |                | 1096.1100 | 2 | 6.4  | 144 | 164 | No  |
|     |             |      |                                                                        | DIVPGDIVEIIVGDKVPADIR   | K | L | 95.00% | 34  |                | 731.0744  | 3 | 4.5  | 144 | 164 | No  |
|     |             |      |                                                                        | EEMHLEDSANFIK           | R | Y | 95.00% | 67  | M3: Oxidation  | 789.8639  | 2 | 5.8  | 573 | 585 | No  |
|     |             |      |                                                                        | EEMHLEDSANFIK           | R | Y | 95.00% | 41  |                | 781.8655  | 2 | 4.5  | 573 | 585 | No  |
|     |             |      |                                                                        | EFDELNPSAQR             | R | D | 95.00% | 70  |                | 653.3090  | 2 | 1.9  | 656 | 666 | No  |
|     |             |      |                                                                        | EFTLEFSR                | K | D | 95.00% | 42  |                | 1028.5150 | 1 | 9.6  | 482 | 489 | Yes |
|     |             |      |                                                                        | EFTLEFSR                | K | D | 95.00% | 60  |                | 514.7578  | 2 | 2.4  | 482 | 489 | Yes |
|     |             |      |                                                                        | EPLISGWLFFR             | K | Y | 95.00% | 63  |                | 682.8785  | 2 | 9.1  | 825 | 835 | Yes |
|     |             |      |                                                                        | EWGSGSDTLR              | R | C | 95.00% | 32  |                | 1107.5150 | 1 | 7.4  | 550 | 559 | No  |
|     |             |      |                                                                        | EWGSGSDTLR              | R | C | 95.00% | 36  |                | 554.2611  | 2 | 6.6  | 550 | 559 | No  |
|     |             |      |                                                                        | GAPEGVDR                | K | C | 95.00% | 58  |                | 457.2430  | 2 | 4.2  | 515 | 523 | Yes |
|     |             |      |                                                                        | HTDPVDPDR               | K | A | 95.00% | 35  |                | 517.2593  | 2 | 3.8  | 190 | 198 | No  |
|     |             |      |                                                                        | IGIFGQDEVDTSK           | R | A | 95.00% | 108 |                | 704.8568  | 2 | 6.8  | 638 | 650 | No  |
|     |             |      |                                                                        | IRDEMVAEQER             | K | T | 95.00% | 59  | M5: Oxidation  | 746.8613  | 2 | 5.5  | 235 | 246 | No  |
|     |             |      |                                                                        | IRDEMVAEQER             | K | T | 95.00% | 38  | M5: Oxidation  | 498.2436  | 3 | 5.8  | 235 | 246 | No  |
|     |             |      |                                                                        | ISLPVILMDETLK           | K | F | 95.00% | 91  | M8: Oxidation  | 744.4288  | 2 | 6.7  | 972 | 984 | No  |
|     |             |      |                                                                        | ISLPVILMDETLK           | K | F | 95.00% | 39  | M8: Oxidation  | 496.6219  | 3 | 7.0  | 972 | 984 | No  |
|     |             |      |                                                                        | ISLPVILMDETLK           | K | F | 95.00% | 70  |                | 736.4296  | 2 | 4.5  | 972 | 984 | No  |
|     |             |      |                                                                        | IVEFLQSFDEITAMTDGVDNDAP |   |   |        |     |                |           |   |      |     |     |     |
|     |             |      |                                                                        | ALK                     | K | K | 95.00% | 82  | M14: Oxidation | 933.1315  | 3 | 6.5  | 686 | 711 | No  |
|     |             |      |                                                                        | IVEFLQSFDEITAMTDGVDNDAP |   |   |        |     |                |           |   |      |     |     |     |
|     |             |      |                                                                        | ALKK                    | K | A | 95.00% | 50  | M14: Oxidation | 975.8299  | 3 | 6.3  | 686 | 712 | No  |
|     |             |      |                                                                        | KAEIGIAMGSGTAVAK        | K | T | 95.00% | 119 | M8: Oxidation  | 760.4186  | 2 | 9.2  | 712 | 727 | Yes |
|     |             |      |                                                                        | KAEIGIAMGSGTAVAK        | K | T | 95.00% | 71  | M8: Oxidation  | 507.2777  | 3 | 1.2  | 712 | 727 | Yes |
|     |             |      |                                                                        | KAEIGIAMGSGTAVAK        | K | T | 95.00% | 53  |                | 501.9464  | 3 | 1.9  | 712 | 727 | Yes |
|     |             |      |                                                                        | KEFTLEFSR               | K | D | 95.00% | 50  |                | 578.8086  | 2 | 7.8  | 481 | 489 | Yes |
|     |             |      |                                                                        | KNMLFSGTNIAAGK          | K | A | 95.00% | 40  | M3: Oxidation  | 734.3868  | 2 | 1.8  | 205 | 218 | Yes |
|     |             |      |                                                                        | KNMLFSGTNIAAGK          | K | A | 95.00% | 43  | M3: Oxidation  | 489.9285  | 3 | 4.7  | 205 | 218 | Yes |
|     |             |      |                                                                        | LDEFGEQLSK              | K | V | 95.00% | 42  |                | 1165.5850 | 1 | 9.3  | 253 | 262 | Yes |
|     |             |      |                                                                        | LDEFGEQLSK              | K | V | 95.00% | 70  |                | 583.2954  | 2 | 7.4  | 253 | 262 | Yes |
|     |             |      |                                                                        | MNVFDTELK               | K | G | 95.00% | 42  | M1: Oxidation  | 1112.5410 | 1 | 9.5  | 452 | 460 | No  |
|     |             |      |                                                                        | MNVFDTELK               | K | G | 95.00% | 59  | M1: Oxidation  | 556.7715  | 2 | 4.7  | 452 | 460 | No  |
|     |             |      |                                                                        | MNVFDTELK               | K | G | 95.00% | 56  |                | 548.7729  | 2 | 2.7  | 452 | 460 | No  |
|     |             |      |                                                                        | MNVFDTELKGLSK           | K | I | 95.00% | 44  | M1: Oxidation  | 749.3846  | 2 | -0.7 | 452 | 464 | No  |
|     |             |      |                                                                        | MNVFDTELKGLSK           | K | I | 95.00% | 35  | M1: Oxidation  | 499.9281  | 3 | 4.2  | 452 | 464 | No  |

|                         |   |   |        |     |                |           |   |      |     |     |     |
|-------------------------|---|---|--------|-----|----------------|-----------|---|------|-----|-----|-----|
| NAENAIEALK              | R | E | 95.00% | 41  |                | 1072.5620 | 1 | -1.5 | 111 | 120 | Yes |
| NAENAIEALK              | R | E | 95.00% | 71  |                | 536.7884  | 2 | 4.8  | 111 | 120 | Yes |
| NAENAIEALKEYEPEMGK      | R | V | 95.00% | 103 | M16: Oxidation | 1026.4930 | 2 | 8.7  | 111 | 128 | Yes |
| NAENAIEALKEYEPEMGK      | R | V | 95.00% | 70  | M16: Oxidation | 684.6614  | 3 | 4.3  | 111 | 128 | Yes |
| NAENAIEALKEYEPEMGK      | R | V | 95.00% | 95  |                | 1018.4920 | 2 | 5.9  | 111 | 128 | Yes |
| NAENAIEALKEYEPEMGK      | R | V | 95.00% | 46  |                | 679.3293  | 3 | 3.7  | 111 | 128 | Yes |
| NMLFSGTNIAGK            | K | A | 95.00% | 98  | M2: Oxidation  | 670.3395  | 2 | 2.5  | 206 | 218 | Yes |
| NMLFSGTNIAGK            | K | A | 95.00% | 84  |                | 662.3448  | 2 | 6.6  | 206 | 218 | Yes |
| NYLEPAILE               | R | - | 95.00% | 46  |                | 1061.5620 | 1 | 9.7  | 989 | 997 | No  |
| NYLEPAILE               | R | - | 95.00% | 49  |                | 531.2823  | 2 | 4.5  | 989 | 997 | No  |
| REEMHLEDSANFIK          | R | Y | 95.00% | 38  | M4: Oxidation  | 578.9455  | 3 | 5.1  | 572 | 585 | No  |
| RIGIFGQDEDVTSK          | R | A | 95.00% | 71  |                | 782.9078  | 2 | 6.6  | 637 | 650 | No  |
| RIGIFGQDEDVTSK          | R | A | 95.00% | 48  |                | 522.2734  | 3 | 4.6  | 637 | 650 | No  |
| STTLRVDQSILTGESVSVIK    | K | H | 95.00% | 45  |                | 711.7365  | 3 | 8.0  | 170 | 189 | Yes |
| TASEMVLADDNFSTIVAAVEEGR | K | A | 95.00% | 158 | M5: Oxidation  | 1221.0910 | 2 | 9.7  | 728 | 750 | Yes |
| TASEMVLADDNFSTIVAAVEEGR | K | A | 95.00% | 100 | M5: Oxidation  | 814.3936  | 3 | 6.1  | 728 | 750 | Yes |
| TASEMVLADDNFSTIVAAVEEGR | K | A | 95.00% | 61  | M5: Oxidation  | 611.0388  | 4 | -7.6 | 728 | 750 | Yes |
| TVEEVLGHFGVNESTGLSLEQV  | K | K | 95.00% | 53  |                | 824.7639  | 3 | 5.6  | 8   | 30  | No  |
| TVEEVLGHFGVNESTGLSLEQV  | K | L | 95.00% | 86  |                | 867.4625  | 3 | 5.6  | 8   | 31  | No  |
| VDQSILTGESVSVIK         | R | H | 95.00% | 96  |                | 787.9398  | 2 | 4.8  | 175 | 189 | Yes |
| VDQSILTGESVSVIK         | R | H | 95.00% | 75  |                | 525.6276  | 3 | 2.0  | 175 | 189 | Yes |
| VGEATEALTCLVEK          | K | M | 95.00% | 87  |                | 782.4081  | 2 | 9.1  | 437 | 451 | No  |
| VGSTKVPMTSGVK           | R | Q | 95.00% | 33  | M8: Oxidation  | 653.8603  | 2 | 6.7  | 529 | 541 | No  |
| VIMITGDNK               | R | G | 95.00% | 44  | M3: Oxidation  | 1006.5330 | 1 | 8.2  | 620 | 628 | Yes |
| VIMITGDNK               | R | G | 95.00% | 49  | M3: Oxidation  | 503.7675  | 2 | 2.7  | 620 | 628 | Yes |
| VIMITGDNK               | R | G | 95.00% | 39  |                | 495.7693  | 2 | 1.1  | 620 | 628 | Yes |
| WGSNELPAEEGK            | R | T | 95.00% | 80  |                | 658.8126  | 2 | 3.7  | 36  | 47  | No  |

ISOFORM 1 OF VERY-LONG-CHAIN SPECIFIC  
ACYL-COA DEHYDROGENASE, MITOCHONDRIAL  
PRECURSOR.; ISOFORM 2 OF VERY-LONG-CHAIN  
SPECIFIC ACYL-COA  
DEHYDROGENASE, MITOCHONDRIAL  
PRECURSOR.

290 IPI00028031; IPI00178744

ACADVL

|                        |   |   |        |     |                |           |   |     |     |     |    |
|------------------------|---|---|--------|-----|----------------|-----------|---|-----|-----|-----|----|
| AGLGSGLSLSGLVHPELSR    | R | S | 95.00% | 116 |                | 925.5169  | 2 | 6.7 | 559 | 577 | No |
| AGLGSGLSLSGLVHPELSR    | R | S | 95.00% | 72  |                | 617.3464  | 3 | 5.3 | 559 | 577 | No |
| ALEQFATVVEAK           | R | L | 95.00% | 54  |                | 1305.7170 | 1 | 8.8 | 585 | 596 | No |
| ALEQFATVVEAK           | R | L | 95.00% | 104 |                | 653.3574  | 2 | 1.1 | 585 | 596 | No |
| ALEQFATVVEAK           | R | L | 95.00% | 29  |                | 435.9088  | 3 | 4.0 | 585 | 596 | No |
| ASNTAEVFFDGVR          | K | V | 95.00% | 87  |                | 706.8473  | 2 | 4.1 | 350 | 362 | No |
| ASNTAEVFFDGVR          | K | V | 95.00% | 53  |                | 471.5678  | 3 | 4.8 | 350 | 362 | No |
| EGMAALQSDPWQQELYR      | R | N | 95.00% | 99  | M3: Oxidation  | 1019.4780 | 2 | 7.2 | 662 | 678 | No |
| EKITAFVVER             | K | G | 95.00% | 53  |                | 596.3431  | 2 | 3.8 | 323 | 332 | No |
| ELSGLSALK              | K | N | 95.00% | 51  |                | 974.5566  | 1 | 4.4 | 529 | 538 | No |
| ELSGLSALK              | K | N | 95.00% | 60  |                | 487.7812  | 2 | 2.3 | 529 | 538 | No |
| ELVEPVS                | K | F | 95.00% | 36  |                | 928.5120  | 1 | 1.6 | 150 | 157 | No |
| ELVEPVS                | K | F | 95.00% | 36  |                | 464.7605  | 2 | 2.9 | 150 | 157 | No |
| FFEEVNDPAK             | R | N | 95.00% | 58  |                | 598.2877  | 2 | 3.4 | 158 | 167 | No |
| FFEEVNDPAKNDALEMVEETTW | R | N | 95.00% | 58  |                | 598.2877  | 2 | 3.4 | 158 | 167 | No |
| QGLK                   | R | E | 95.00% | 70  | M16: Oxidation | 1019.4860 | 3 | 7.0 | 158 | 183 | No |
| FGMAAALAGTMR           | R | G | 95.00% | 51  | M11: Oxidation | 606.8000  | 2 | 4.3 | 388 | 399 | No |
| FGMAAALAGTMR           | R | G | 95.00% | 35  | M3: Oxidation  | 606.7992  | 2 | 2.9 | 388 | 399 | No |
| FGMAAALAGTMR           | R | G | 95.00% | 92  | M3: Oxidation  | 614.7960  | 2 | 1.8 | 388 | 399 | No |
| FGMAAALAGTMR           | R | G | 95.00% | 92  | M3: Oxidation, | 614.7960  | 2 | 1.8 | 388 | 399 | No |
| FGMAAALAGTMR           | R | G | 95.00% | 92  | M11: Oxidation | 614.7960  | 2 | 1.8 | 388 | 399 | No |
| GFGGITHGPEEK           | R | K | 95.00% | 70  |                | 598.8099  | 2 | 4.6 | 333 | 344 | No |
| GFGGITHGPEEK           | R | M | 95.00% | 54  |                | 662.8566  | 2 | 2.9 | 333 | 345 | No |
| GFGGITHGPEEK           | R | M | 95.00% | 45  |                | 442.2397  | 3 | 1.4 | 333 | 345 | No |
| GGVVTSNPLGF            | R | - | 95.00% | 38  |                | 1047.5540 | 1 | 6.4 | 691 | 701 | No |
| GGVVTSNPLGF            | R | - | 95.00% | 62  |                | 524.2798  | 2 | 4.0 | 691 | 701 | No |
| GILLFGTK               | K | A | 95.00% | 33  |                | 848.5312  | 1 | 7.7 | 234 | 241 | No |
| GILLFGTK               | K | A | 95.00% | 54  |                | 424.7680  | 2 | 4.0 | 234 | 241 | No |
| GIVNEQFLQR             | K | L | 95.00% | 76  |                | 658.8741  | 2 | 5.7 | 603 | 613 | No |
| GIVNEQFLQR             | K | L | 95.00% | 43  |                | 439.5842  | 3 | 3.2 | 603 | 613 | No |
| GKELSGLSALK            | K | N | 95.00% | 53  |                | 580.3402  | 2 | 3.2 | 527 | 538 | No |

| Accession | Gene                                                                                                                                                                                | Protein                                                                                                                                                                                                                                                                                                                                                                                                    | Modification             | Start  | End | Score          | Count | Mass      | Charge | Intensity | Label | Retention | Area |
|-----------|-------------------------------------------------------------------------------------------------------------------------------------------------------------------------------------|------------------------------------------------------------------------------------------------------------------------------------------------------------------------------------------------------------------------------------------------------------------------------------------------------------------------------------------------------------------------------------------------------------|--------------------------|--------|-----|----------------|-------|-----------|--------|-----------|-------|-----------|------|
|           |                                                                                                                                                                                     | GQLTTDQVFPYPSVLNEEQTF                                                                                                                                                                                                                                                                                                                                                                                      |                          |        |     |                |       |           |        |           |       |           |      |
|           |                                                                                                                                                                                     | LK                                                                                                                                                                                                                                                                                                                                                                                                         | K E                      | 95.00% | 74  |                |       | 928.1445  | 3      | 8.7       | 126   | 149       | No   |
|           |                                                                                                                                                                                     | IFEGTNDILR                                                                                                                                                                                                                                                                                                                                                                                                 | R L                      | 95.00% | 44  |                |       | 1177.6290 | 1      | 5.7       | 506   | 515       | No   |
|           |                                                                                                                                                                                     | IFEGTNDILR                                                                                                                                                                                                                                                                                                                                                                                                 | R L                      | 95.00% | 75  |                |       | 589.3185  | 2      | 6.2       | 484   | 493       | No   |
|           |                                                                                                                                                                                     | IFGSEAAWK                                                                                                                                                                                                                                                                                                                                                                                                  | K V                      | 95.00% | 34  |                |       | 1008.5230 | 1      | 7.7       | 466   | 474       | No   |
|           |                                                                                                                                                                                     | IFGSEAAWK                                                                                                                                                                                                                                                                                                                                                                                                  | K V                      | 95.00% | 59  |                |       | 504.7631  | 2      | 2.9       | 466   | 474       | No   |
|           |                                                                                                                                                                                     | IHNFGLIQEK                                                                                                                                                                                                                                                                                                                                                                                                 | K L                      | 95.00% | 61  |                |       | 599.8354  | 2      | 3.7       | 419   | 428       | No   |
|           |                                                                                                                                                                                     | IHNFGLIQEK                                                                                                                                                                                                                                                                                                                                                                                                 | K L                      | 95.00% | 40  |                |       | 400.2260  | 3      | 3.3       | 419   | 428       | No   |
|           |                                                                                                                                                                                     | IREGMAALQSDPWQQELYR                                                                                                                                                                                                                                                                                                                                                                                        | R N                      | 95.00% | 43  | M5: Oxidation  |       | 769.7158  | 3      | 5.4       | 660   | 678       | No   |
|           |                                                                                                                                                                                     | ITAFVVER                                                                                                                                                                                                                                                                                                                                                                                                   | K G                      | 95.00% | 53  |                |       | 467.7750  | 2      | 6.5       | 303   | 310       | No   |
|           |                                                                                                                                                                                     | KGIVNEQFLLQR                                                                                                                                                                                                                                                                                                                                                                                               | K L                      | 95.00% | 73  |                |       | 722.9214  | 2      | 5.1       | 602   | 613       | No   |
|           |                                                                                                                                                                                     | KGIVNEQFLLQR                                                                                                                                                                                                                                                                                                                                                                                               | K L                      | 95.00% | 39  |                |       | 482.2826  | 3      | 3.0       | 602   | 613       | No   |
|           |                                                                                                                                                                                     | LWISNGGLADIFTVFAK                                                                                                                                                                                                                                                                                                                                                                                          | K T                      | 95.00% | 127 |                |       | 926.5102  | 2      | 6.3       | 294   | 310       | No   |
|           |                                                                                                                                                                                     | LWISNGGLADIFTVFAK                                                                                                                                                                                                                                                                                                                                                                                          | K T                      | 95.00% | 51  |                |       | 618.0093  | 3      | 6.2       | 294   | 310       | No   |
|           |                                                                                                                                                                                     | NDALEMVEETTWQGLK                                                                                                                                                                                                                                                                                                                                                                                           | K E                      | 95.00% | 83  | M6: Oxidation  |       | 940.4473  | 2      | 6.2       | 168   | 183       | No   |
|           |                                                                                                                                                                                     | NPFNAGLLLLGEAGK                                                                                                                                                                                                                                                                                                                                                                                            | K Q                      | 95.00% | 97  |                |       | 729.3953  | 2      | 4.9       | 539   | 553       | No   |
|           |                                                                                                                                                                                     | NPFNAGLLLLGEAGK                                                                                                                                                                                                                                                                                                                                                                                            | K Q                      | 95.00% | 56  |                |       | 486.5990  | 3      | 3.9       | 539   | 553       | No   |
|           |                                                                                                                                                                                     | RAGLGSGLSGLVHPELSR                                                                                                                                                                                                                                                                                                                                                                                         | R S                      | 95.00% | 74  |                |       | 669.3805  | 3      | 5.5       | 558   | 577       | No   |
|           |                                                                                                                                                                                     | RAGLGSGLSGLVHPELSR                                                                                                                                                                                                                                                                                                                                                                                         | R S                      | 95.00% | 51  |                |       | 502.2878  | 4      | 6.3       | 536   | 555       | No   |
|           |                                                                                                                                                                                     | SFAVGMFK                                                                                                                                                                                                                                                                                                                                                                                                   | K G                      | 95.00% | 31  | M6: Oxidation  |       | 902.4482  | 1      | 3.9       | 118   | 125       | No   |
|           |                                                                                                                                                                                     | TPVTDPATGAVK                                                                                                                                                                                                                                                                                                                                                                                               | K E                      | 95.00% | 40  |                |       | 1156.6290 | 1      | 6.5       | 311   | 322       | No   |
|           |                                                                                                                                                                                     | TPVTDPATGAVK                                                                                                                                                                                                                                                                                                                                                                                               | K E                      | 95.00% | 69  |                |       | 578.8167  | 2      | 3.3       | 289   | 300       | No   |
|           |                                                                                                                                                                                     | YAMHILNNGR                                                                                                                                                                                                                                                                                                                                                                                                 | K F                      | 95.00% | 54  | M3: Oxidation  |       | 570.8036  | 2      | 4.0       | 356   | 365       | No   |
|           |                                                                                                                                                                                     | VPSENVLGEVSGFK                                                                                                                                                                                                                                                                                                                                                                                             | R V                      | 95.00% | 116 |                |       | 759.8988  | 2      | 6.1       | 363   | 377       | No   |
|           |                                                                                                                                                                                     | VPSENVLGEVSGFK                                                                                                                                                                                                                                                                                                                                                                                             | R V                      | 95.00% | 59  |                |       | 506.9349  | 3      | 5.6       | 363   | 377       | No   |
|           |                                                                                                                                                                                     | UBIQUITIN AND RIBOSOMAL PROTEIN S27A<br>PRECURSOR.; CDNA FLJ46113 FIS, CLONE<br>TESTI2036285, HIGHLY SIMILAR TO<br>RATTUSNORVEGICUS UBIQUITIN C.; UBIQUITIN<br>AND RIBOSOMAL PROTEIN L40 PRECURSOR.;<br>UBIQUITIN B PRECURSOR.; 44 KDA PROTEIN.; 44<br>KDA PROTEIN.; 44 KDA PROTEIN.; UBIQUITIN.;<br>UBIQUITIN C SPLICE VARIANT.; 30 KDA<br>PROTEIN.; 16 KDA PROTEIN.; 25 KDA PROTEIN.;<br>39 KDA PROTEIN. |                          |        |     |                |       |           |        |           |       |           |      |
| 291       | IPI00179330; IPI00418813; IPI00456429;<br>IPI00719280; IPI00743241; IPI00743650;<br>IPI00744274; IPI00783060; IPI00784990;<br>IPI00789107; IPI00789823; IPI00790633;<br>IPI00792712 | RPS27A; UBA52;<br>UBB; UBC                                                                                                                                                                                                                                                                                                                                                                                 |                          |        |     |                |       |           |        |           |       |           |      |
|           |                                                                                                                                                                                     | EGIPPDQQR                                                                                                                                                                                                                                                                                                                                                                                                  | K L                      | 95.00% | 36  |                |       | 520.2674  | 2      | 9.2       | 34    | 42        | No   |
|           |                                                                                                                                                                                     | ESTLHLVLR                                                                                                                                                                                                                                                                                                                                                                                                  | K L                      | 95.00% | 36  |                |       | 1067.6300 | 1      | 8.0       | 111   | 119       | No   |
|           |                                                                                                                                                                                     | ESTLHLVLR                                                                                                                                                                                                                                                                                                                                                                                                  | K L                      | 95.00% | 49  |                |       | 534.3167  | 2      | 3.8       | 64    | 72        | No   |
|           |                                                                                                                                                                                     | ESTLHLVLR                                                                                                                                                                                                                                                                                                                                                                                                  | K R                      | 95.00% | 57  |                |       | 534.3159  | 2      | 2.3       | 64    | 72        | No   |
|           |                                                                                                                                                                                     | IQDKEGIPPDQQR                                                                                                                                                                                                                                                                                                                                                                                              | K L                      | 95.00% | 67  |                |       | 762.4022  | 2      | 9.4       | 30    | 42        | No   |
|           |                                                                                                                                                                                     | LIFAGK                                                                                                                                                                                                                                                                                                                                                                                                     | R Q                      | 95.00% | 32  |                |       | 648.4127  | 1      | 6.3       | 43    | 48        | No   |
|           |                                                                                                                                                                                     | TITLEVEPSDTIENVK                                                                                                                                                                                                                                                                                                                                                                                           | K A                      | 95.00% | 112 |                |       | 894.4747  | 2      | 7.6       | 12    | 27        | No   |
|           |                                                                                                                                                                                     | TITLEVEPSDTIENVK                                                                                                                                                                                                                                                                                                                                                                                           | K A                      | 95.00% | 34  |                |       | 596.6525  | 3      | 7.6       | 12    | 27        | No   |
|           |                                                                                                                                                                                     | TLSDYNIQK                                                                                                                                                                                                                                                                                                                                                                                                  | R D                      | 95.00% | 62  |                |       | 541.2828  | 2      | 4.3       | 55    | 63        | No   |
|           |                                                                                                                                                                                     | TLSDYNIQK                                                                                                                                                                                                                                                                                                                                                                                                  | R E                      | 95.00% | 44  |                |       | 541.2824  | 2      | 3.5       | 55    | 63        | No   |
| 292       | IPI00183968                                                                                                                                                                         | TPM3                                                                                                                                                                                                                                                                                                                                                                                                       | TROPOMYOSIN 3 ISOFORM 1. |        |     |                |       |           |        |           |       |           |      |
|           |                                                                                                                                                                                     | AADAAEAVASLNR                                                                                                                                                                                                                                                                                                                                                                                              | K R                      | 95.00% | 49  |                |       | 658.8294  | 2      | 4.9       | 79    | 91        | No   |
|           |                                                                                                                                                                                     | AADAAEAVASLNR                                                                                                                                                                                                                                                                                                                                                                                              | K R                      | 95.00% | 38  |                |       | 439.5562  | 3      | 6.5       | 79    | 91        | No   |
|           |                                                                                                                                                                                     | AADAAEAVASLNRR                                                                                                                                                                                                                                                                                                                                                                                             | K I                      | 95.00% | 43  |                |       | 491.5894  | 3      | 4.8       | 79    | 92        | No   |
|           |                                                                                                                                                                                     | AADESER                                                                                                                                                                                                                                                                                                                                                                                                    | K G                      | 95.00% | 29  |                |       | 777.3453  | 1      | 9.6       | 120   | 126       | Yes  |
|           |                                                                                                                                                                                     | AISEELDHALNDMTSI                                                                                                                                                                                                                                                                                                                                                                                           | K -                      | 95.00% | 65  | M13: Oxidation |       | 887.9175  | 2      | 5.8       | 270   | 285       | Yes  |
|           |                                                                                                                                                                                     | AISEELDHALNDMTSI                                                                                                                                                                                                                                                                                                                                                                                           | K -                      | 95.00% | 35  | M13: Oxidation |       | 592.2813  | 3      | 6.4       | 270   | 285       | Yes  |
|           |                                                                                                                                                                                     | AISEELDHALNDMTSI                                                                                                                                                                                                                                                                                                                                                                                           | K -                      | 95.00% | 44  |                |       | 879.9221  | 2      | 8.1       | 270   | 285       | Yes  |
|           |                                                                                                                                                                                     | ALKDEEKMEIQIQLK                                                                                                                                                                                                                                                                                                                                                                                            | R E                      | 95.00% | 107 | M8: Oxidation  |       | 981.0223  | 2      | 5.1       | 135   | 150       | Yes  |
|           |                                                                                                                                                                                     | ALKDEEKMEIQIQLK                                                                                                                                                                                                                                                                                                                                                                                            | R E                      | 95.00% | 46  | M8: Oxidation  |       | 654.3511  | 3      | 5.5       | 135   | 150       | Yes  |
|           |                                                                                                                                                                                     | ALKDEEKMEIQIQLK                                                                                                                                                                                                                                                                                                                                                                                            | R E                      | 95.00% | 38  | M8: Oxidation  |       | 491.0146  | 4      | 4.2       | 135   | 150       | Yes  |
|           |                                                                                                                                                                                     | DAQEKLEAEK                                                                                                                                                                                                                                                                                                                                                                                                 | K K                      | 95.00% | 42  |                |       | 637.3395  | 2      | 5.5       | 67    | 77        | Yes  |
|           |                                                                                                                                                                                     | DAQEKLEAEK                                                                                                                                                                                                                                                                                                                                                                                                 | K K                      | 95.00% | 39  |                |       | 425.2288  | 3      | 5.1       | 67    | 77        | Yes  |
|           |                                                                                                                                                                                     | DEEKMEIQIQLK                                                                                                                                                                                                                                                                                                                                                                                               | K E                      | 95.00% | 62  | M5: Oxidation  |       | 824.9155  | 2      | 7.6       | 138   | 150       | Yes  |
|           |                                                                                                                                                                                     | EDKYEIEIK                                                                                                                                                                                                                                                                                                                                                                                                  | K I                      | 95.00% | 30  |                |       | 591.7847  | 2      | 7.0       | 219   | 227       | Yes  |
|           |                                                                                                                                                                                     | GTEDELDKYSEALKDAQEK                                                                                                                                                                                                                                                                                                                                                                                        | K D                      | 95.00% | 100 |                |       | 799.3884  | 2      | 5.7       | 53    | 66        | Yes  |
|           |                                                                                                                                                                                     | GTEDELDKYSEALKDAQEK                                                                                                                                                                                                                                                                                                                                                                                        | K L                      | 95.00% | 69  |                |       | 723.6816  | 3      | 4.3       | 53    | 71        | Yes  |
|           |                                                                                                                                                                                     | HIAEADRKYEEVAR                                                                                                                                                                                                                                                                                                                                                                                             | K K                      | 95.00% | 53  |                |       | 908.4615  | 2      | 8.9       | 154   | 168       | Yes  |
|           |                                                                                                                                                                                     | ILTDKLEAETR                                                                                                                                                                                                                                                                                                                                                                                                | K A                      | 95.00% | 56  |                |       | 708.9106  | 2      | 4.8       | 228   | 239       | Yes  |
|           |                                                                                                                                                                                     | QLVEEELDR                                                                                                                                                                                                                                                                                                                                                                                                  | R A                      | 95.00% | 57  |                |       | 1243.6630 | 1      | 7.9       | 93    | 102       | Yes  |
|           |                                                                                                                                                                                     | QLVEEELDR                                                                                                                                                                                                                                                                                                                                                                                                  | R A                      | 95.00% | 95  |                |       | 622.3312  | 2      | 0.8       | 93    | 102       | Yes  |
|           |                                                                                                                                                                                     | QLVEEELDRAQER                                                                                                                                                                                                                                                                                                                                                                                              | R L                      | 95.00% | 66  |                |       | 864.4579  | 2      | 8.8       | 93    | 106       | Yes  |
|           |                                                                                                                                                                                     | QLVEEELDRAQER                                                                                                                                                                                                                                                                                                                                                                                              | R L                      | 95.00% | 52  |                |       | 576.6364  | 3      | 0.4       | 93    | 106       | Yes  |
|           |                                                                                                                                                                                     | KAADAAEAVASLNR                                                                                                                                                                                                                                                                                                                                                                                             | K R                      | 95.00% | 117 |                |       | 722.8766  | 2      | 4.1       | 78    | 91        | No   |
|           |                                                                                                                                                                                     | KAADAAEAVASLNR                                                                                                                                                                                                                                                                                                                                                                                             | K R                      | 95.00% | 49  |                |       | 482.2543  | 3      | 5.2       | 78    | 91        | No   |
|           |                                                                                                                                                                                     | KAADAAEAVASLNRR                                                                                                                                                                                                                                                                                                                                                                                            | K I                      | 95.00% | 43  |                |       | 800.9291  | 2      | 6.0       | 78    | 92        | No   |
|           |                                                                                                                                                                                     | KAADAAEAVASLNRR                                                                                                                                                                                                                                                                                                                                                                                            | K I                      | 95.00% | 44  |                |       | 534.2871  | 3      | 3.1       | 78    | 92        | No   |

ADENOSINE MONOPHOSPHATE DEAMINASE 1.;  
AMP DEAMINASE 1.; 90 KDA PROTEIN.

|                        |   |   |        |     |                    |           |   |     |     |     |     |
|------------------------|---|---|--------|-----|--------------------|-----------|---|-----|-----|-----|-----|
| KLVIIEGDLER            | R | T | 95.00% | 69  |                    | 642.8843  | 2 | 6.0 | 169 | 179 | Yes |
| KLVIIEGDLER            | R | T | 95.00% | 75  |                    | 428.9243  | 3 | 3.3 | 169 | 179 | Yes |
| KLVIIEGDLERTEER        | R | A | 95.00% | 31  |                    | 900.5034  | 2 | 6.6 | 169 | 183 | Yes |
| KLVIIEGDLERTEER        | R | A | 95.00% | 40  |                    | 600.6729  | 3 | 8.9 | 169 | 183 | Yes |
| LATALQKLEEA EK         | R | A | 95.00% | 87  |                    | 722.4111  | 2 | 5.7 | 107 | 119 | Yes |
| LATALQKLEEA EK         | R | A | 95.00% | 38  |                    | 481.9438  | 3 | 6.8 | 107 | 119 | Yes |
| LATALQKLEEA EKA ADESER | R | G | 95.00% | 71  |                    | 734.7194  | 3 | 7.8 | 107 | 126 | Yes |
| LATALQKLEEA EKA ADESER | R | G | 95.00% | 30  |                    | 551.2904  | 4 | 5.8 | 107 | 126 | Yes |
| LDKENALDR              | K | A | 95.00% | 45  |                    | 537.2878  | 2 | 8.0 | 14  | 22  | Yes |
| LDKENALDRAEQAEAEQK     | K | Q | 95.00% | 85  |                    | 1029.5180 | 2 | 8.5 | 14  | 31  | No  |
| LDKENALDRAEQAEAEQK     | K | Q | 95.00% | 42  |                    | 686.6797  | 3 | 6.3 | 14  | 31  | No  |
| LDKENALDRAEQAEAEQK     | K | Q | 95.00% | 35  |                    | 515.2603  | 4 | 3.6 | 14  | 31  | No  |
| LEEA EKA ADESER        | K | G | 95.00% | 94  |                    | 738.8469  | 2 | 2.8 | 114 | 126 | Yes |
| LEEA EKA ADESER        | K | G | 95.00% | 63  |                    | 492.8999  | 3 | 1.4 | 114 | 126 | Yes |
| LEEA EKA ADESERGMK     | K | V | 95.00% | 62  | M15: Oxidation     | 904.9289  | 2 | 9.0 | 114 | 129 | Yes |
| LEEA EKA ADESERGMK     | K | V | 95.00% | 37  | M15: Oxidation     | 603.6193  | 3 | 4.7 | 114 | 129 | Yes |
| LKEAETR                | K | A | 95.00% | 32  |                    | 423.7403  | 2 | 4.9 | 233 | 239 | Yes |
| LKGTEDELDKYSEALK       | K | D | 95.00% | 100 |                    | 919.9786  | 2 | 5.6 | 51  | 66  | Yes |
| LKGTEDELDKYSEALK       | K | D | 95.00% | 54  |                    | 613.6548  | 3 | 5.4 | 51  | 66  | Yes |
| LKGTEDELDKYSEALK       | K | D | 95.00% | 40  |                    | 460.4929  | 4 | 4.8 | 51  | 66  | Yes |
| LVIIIEGDLER            | K | T | 95.00% | 69  |                    | 578.8371  | 2 | 7.3 | 170 | 179 | Yes |
| MELQEIQLK              | K | E | 95.00% | 52  | M1: Oxidation      | 574.3075  | 2 | 3.2 | 142 | 150 | Yes |
|                        |   |   |        |     | M1: Oxidation, M3: |           |   |     |     |     |     |
| MQMLKLDKENALDR         | K | A | 95.00% | 36  | Oxidation          | 868.9426  | 2 | 5.6 | 9   | 22  | Yes |
| QLEDELAAMQK            | K | K | 95.00% | 85  | M9: Oxidation      | 646.3175  | 2 | 5.1 | 39  | 49  | No  |
| QLEDELAAMQK            | K | K | 95.00% | 41  |                    | 638.3215  | 2 | 7.4 | 39  | 49  | No  |
| RIQLVEEELDR            | R | A | 95.00% | 73  |                    | 700.3859  | 2 | 6.7 | 92  | 102 | Yes |
| RIQLVEEELDR            | R | A | 95.00% | 60  |                    | 467.2593  | 3 | 5.4 | 92  | 102 | Yes |
| RIQLVEEELDRAQER        | R | L | 95.00% | 41  |                    | 628.6716  | 3 | 2.7 | 92  | 106 | Yes |
| RIQLVEEELDRAQER        | R | L | 95.00% | 48  |                    | 471.7569  | 4 | 5.3 | 92  | 106 | Yes |
| SKQLEDELAAMQK          | R | K | 95.00% | 75  | M11: Oxidation     | 753.8845  | 2 | 9.1 | 37  | 49  | No  |
| SKQLEDELAAMQK          | R | K | 95.00% | 37  | M11: Oxidation     | 502.9246  | 3 | 7.0 | 37  | 49  | No  |
| SKQLEDELAAMQKK         | R | L | 95.00% | 70  | M11: Oxidation     | 817.9311  | 2 | 7.3 | 37  | 50  | No  |
| SKQLEDELAAMQKK         | R | L | 95.00% | 56  | M11: Oxidation     | 545.6226  | 3 | 6.0 | 37  | 50  | No  |
| SLEAQAEK               | K | Y | 95.00% | 43  |                    | 438.2304  | 2 | 6.3 | 207 | 214 | Yes |
| TIDDELELYAQK           | K | L | 95.00% | 100 |                    | 776.8774  | 2 | 5.3 | 253 | 265 | Yes |
| TIDDELELYAQK           | K | L | 95.00% | 52  |                    | 518.2546  | 3 | 6.2 | 253 | 265 | Yes |
| YSQKEDKYEIEIK          | K | I | 95.00% | 78  |                    | 844.9086  | 2 | 4.3 | 215 | 227 | Yes |
| YSQKEDKYEIEIK          | K | I | 95.00% | 31  |                    | 563.6105  | 3 | 8.1 | 215 | 227 | Yes |
| DGVVYYPNEAAVSK         | K | D | 95.00% | 66  |                    | 805.9095  | 2 | 3.0 | 241 | 255 | No  |
| EPLMEEYIAIAAQVFK       | K | L | 95.00% | 108 | M4: Oxidation      | 877.9415  | 2 | 4.4 | 688 | 702 | No  |
| EPLMEEYIAIAAQVFK       | K | L | 95.00% | 54  | M4: Oxidation      | 585.6287  | 3 | 1.8 | 688 | 702 | No  |
| EPLMEEYIAIAAQVFK       | K | L | 95.00% | 65  |                    | 869.9458  | 2 | 6.5 | 688 | 702 | No  |
| EVGADLVEAK             | K | Y | 95.00% | 46  |                    | 1030.5500 | 1 | 7.5 | 438 | 447 | No  |
| EVGADLVEAK             | K | Y | 95.00% | 64  |                    | 515.7759  | 2 | 1.7 | 438 | 447 | No  |
| FDKFNKYNPVGASELR       | R | D | 95.00% | 111 |                    | 1000.5020 | 2 | 3.9 | 401 | 417 | No  |
| FDKFNKYNPVGASELR       | R | D | 95.00% | 42  |                    | 667.3371  | 3 | 3.9 | 401 | 417 | No  |
| FDKFNKYNPVGASELR       | R | D | 95.00% | 42  |                    | 500.7548  | 4 | 3.9 | 401 | 417 | No  |
| FLGDNYLEEGPAGNDR       | K | R | 95.00% | 122 |                    | 940.4519  | 2 | 6.9 | 729 | 745 | No  |
| FLGDNYLEEGPAGNDR       | K | R | 95.00% | 46  |                    | 627.3019  | 3 | 3.8 | 729 | 745 | No  |
| FLGDNYLEEGPAGNDR       | K | T | 95.00% | 47  |                    | 1018.5040 | 2 | 7.6 | 729 | 746 | No  |
| FLGDNYLEEGPAGNDR       | K | T | 95.00% | 60  |                    | 679.3348  | 3 | 2.4 | 729 | 746 | No  |
|                        |   |   |        |     | M6: Oxidation,     |           |   |     |     |     |     |
| FOVHOMLNEMDELK         | K | E | 95.00% | 51  | M10: Oxidation     | 897.4174  | 2 | 3.7 | 300 | 313 | No  |
| GEDPFRDNLNLPENLGYHLK   | K | M | 95.00% | 38  |                    | 739.0356  | 3 | 5.7 | 220 | 238 | No  |
|                        |   |   |        |     | M3: Oxidation,     |           |   |     |     |     |     |
| GLMISLSTDDPMQFHFTK     | K | E | 95.00% | 49  | M12: Oxidation     | 1050.5030 | 2 | 9.1 | 670 | 687 | No  |
| HITGFDSVDDSK           | K | H | 95.00% | 91  |                    | 725.3334  | 2 | 6.1 | 534 | 546 | No  |
| HITGFDSVDDSKHSGHMFSSK  | K | S | 95.00% | 37  | M18: Oxidation     | 616.7782  | 4 | 2.3 | 534 | 555 | No  |
| IYDVFR                 | R | S | 95.00% | 34  |                    | 406.7198  | 2 | 1.2 | 491 | 496 | No  |
| KGEDPFRDNLNLPENLGYHLK  | K | M | 95.00% | 52  |                    | 781.7360  | 3 | 8.1 | 219 | 238 | No  |
| KTVNLSIPLSETSSTK       | R | L | 95.00% | 115 |                    | 852.9775  | 2 | 5.1 | 109 | 124 | No  |
| KTVNLSIPLSETSSTK       | R | L | 95.00% | 45  |                    | 568.9858  | 3 | 2.0 | 109 | 124 | No  |
| LKMHPYDLTVDSLVDHAGR    | K | Q | 95.00% | 54  | M3: Oxidation      | 728.3726  | 3 | 4.7 | 377 | 395 | No  |
| LKMHPYDLTVDSLVDHAGR    | K | Q | 95.00% | 60  | M3: Oxidation      | 546.5320  | 4 | 5.9 | 377 | 395 | No  |
| MHPYDLTVDSLVDHAGR      | K | Q | 95.00% | 76  | M1: Oxidation      | 971.4633  | 2 | 3.0 | 379 | 395 | No  |
| MHPYDLTVDSLVDHAGR      | K | Q | 95.00% | 83  | M1: Oxidation      | 647.9794  | 3 | 5.0 | 379 | 395 | No  |
| MHPYDLTVDSLVDHAGR      | K | Q | 95.00% | 54  | M1: Oxidation      | 486.2379  | 4 | 7.9 | 379 | 395 | No  |

|                        |   |   |        |     |                              |           |   |     |     |     |    |
|------------------------|---|---|--------|-----|------------------------------|-----------|---|-----|-----|-----|----|
| MKDGVVVYPNEAAVSK       | K | D | 95.00% | 86  | M1: Oxidation                | 943.4770  | 2 | 4.9 | 239 | 255 | No |
| MKDGVVVYPNEAAVSK       | K | D | 95.00% | 45  | M1: Oxidation                | 629.3194  | 3 | 3.0 | 239 | 255 | No |
| NFLPHFGK               | K | M | 95.00% | 42  |                              | 480.2604  | 2 | 2.7 | 499 | 506 | No |
| NIDGEAWANESFYPVFTPPVK  | R | K | 95.00% | 98  |                              | 1240.6200 | 2 | 7.3 | 197 | 218 | No |
| NIDGEAWANESFYPVFTPPVK  | R | K | 95.00% | 33  |                              | 827.4100  | 3 | 0.3 | 197 | 218 | No |
| NIDGEAWANESFYPVFTPPVK  | R | K | 95.00% | 33  |                              | 827.4100  | 3 | 0.3 | 197 | 218 | No |
| K                      | R | G | 95.00% | 36  |                              | 870.1155  | 3 | 8.6 | 197 | 219 | No |
| NPFLDLQK               | K | G | 95.00% | 64  |                              | 561.3070  | 2 | 5.8 | 661 | 669 | No |
| SYQIDADRVVYSTK         | K | E | 95.00% | 89  |                              | 822.9183  | 2 | 3.3 | 351 | 364 | No |
| TDNLPENLGYHLK          | R | M | 95.00% | 70  |                              | 757.3906  | 2 | 5.3 | 226 | 238 | No |
| TDNLPENLGYHLK          | R | M | 95.00% | 42  |                              | 505.2619  | 3 | 3.1 | 226 | 238 | No |
| TDNYINGEYFATIK         | K | E | 95.00% | 81  |                              | 881.4460  | 2 | 8.0 | 423 | 437 | No |
| TDNYINGEYFATIK         | K | E | 95.00% | 40  |                              | 587.9643  | 3 | 4.0 | 423 | 437 | No |
| TVNLSIPLSETSSTK        | K | L | 95.00% | 90  |                              | 788.9325  | 2 | 8.7 | 110 | 124 | No |
| VFASEVKDEGGR           | K | Q | 95.00% | 43  |                              | 647.3273  | 2 | 2.2 | 53  | 64  | No |
| YNPVGASELR             | K | D | 95.00% | 53  |                              | 553.2887  | 2 | 4.9 | 379 | 388 | No |
| ALLELQLEPEELYQTFQR     | R | I | 95.00% | 120 |                              | 1110.5890 | 2 | 6.5 | 163 | 180 | No |
| ALLELQLEPEELYQTFQR     | R | I | 95.00% | 65  |                              | 740.7281  | 3 | 5.9 | 163 | 180 | No |
| ARPPFDGLAEDIDKGEVSAR   | K | Q | 95.00% | 85  |                              | 715.0383  | 3 | 9.7 | 606 | 625 | No |
| ARPPFDGLAEDIDKGEVSAR   | K | Q | 95.00% | 80  |                              | 536.5266  | 4 | 2.2 | 606 | 625 | No |
| AYLPVNESFGFTADLR       | K | S | 95.00% | 108 |                              | 900.4604  | 2 | 8.9 | 786 | 801 | No |
| AYLPVNESFGFTADLR       | K | S | 95.00% | 61  |                              | 600.6414  | 3 | 6.4 | 786 | 801 | No |
| EDLYLKPIQR             | K | T | 95.00% | 28  |                              | 637.8618  | 2 | 3.6 | 440 | 449 | No |
| EGIPALDNFLDKL          | K | - | 95.00% | 67  |                              | 722.8897  | 2 | 1.8 | 846 | 858 | No |
| ETVSEESNLCLSK          | R | S | 95.00% | 60  |                              | 769.3807  | 2 | 7.6 | 581 | 594 | No |
| FSVSPVVR               | K | V | 95.00% | 35  |                              | 445.7594  | 2 | 1.2 | 499 | 506 | No |
| GEGQLGPAER             | K | A | 95.00% | 40  |                              | 507.2577  | 2 | 5.8 | 240 | 249 | No |
| GGGQIIPAR              | R | R | 95.00% | 35  |                              | 485.2806  | 2 | 5.2 | 717 | 726 | No |
| GHVFEESQVAGTPMFVVK     | R | A | 95.00% | 152 | M14: Oxidation               | 989.4997  | 2 | 8.6 | 768 | 785 | No |
| GHVFEESQVAGTPMFVVK     | R | A | 95.00% | 51  | M14: Oxidation               | 660.0015  | 3 | 7.3 | 768 | 785 | No |
| GLKEGIPALDNFLDKL       | K | - | 95.00% | 58  |                              | 871.9944  | 2 | 6.6 | 843 | 858 | No |
| GLKEGIPALDNFLDKL       | K | - | 95.00% | 51  |                              | 581.6636  | 3 | 3.2 | 843 | 858 | No |
| GPLMMYISK              | K | M | 95.00% | 32  | M4: Oxidation, M5: Oxidation | 536.2681  | 2 | 5.9 | 392 | 400 | No |
| IMGPNYTPGK             | R | K | 95.00% | 36  | M2: Oxidation                | 547.2743  | 2 | 5.0 | 429 | 438 | No |
| IMGPNYTPGKK            | R | E | 95.00% | 30  | M2: Oxidation                | 611.3243  | 2 | 8.5 | 429 | 439 | No |
| KEDLYLKPIQR            | K | T | 95.00% | 40  |                              | 701.9109  | 2 | 5.7 | 439 | 449 | No |
| KEDLYLKPIQR            | K | T | 95.00% | 55  |                              | 468.2763  | 3 | 5.2 | 439 | 449 | No |
| NMSVIAHVDHGK           | R | S | 95.00% | 56  | M2: Oxidation                | 662.3318  | 2 | 5.9 | 21  | 32  | No |
| RGHVFEESQVAGTPMFVVK    | K | A | 95.00% | 32  | M15: Oxidation               | 712.0337  | 3 | 4.8 | 767 | 785 | No |
| SDPVVSYR               | K | E | 95.00% | 31  |                              | 461.7376  | 2 | 4.4 | 573 | 580 | No |
| STAISLFYELSENDLNFJK    | K | Q | 95.00% | 118 |                              | 1102.5710 | 2 | 9.9 | 72  | 90  | No |
| STAISLFYELSENDLNFJK    | K | Q | 95.00% | 90  |                              | 735.3810  | 3 | 6.8 | 72  | 90  | No |
| TGTITTFEHAHNMR         | K | V | 95.00% | 51  | M13: Oxidation               | 816.3865  | 2 | 3.2 | 482 | 495 | No |
| TGTITTFEHAHNMR         | K | V | 95.00% | 40  | M13: Oxidation               | 544.5942  | 3 | 4.3 | 482 | 495 | No |
| TILMMGR                | R | Y | 95.00% | 37  | M4: Oxidation, M5: Oxidation | 427.2191  | 2 | 3.1 | 450 | 456 | No |
| VFDAIMNFK              | K | K | 95.00% | 42  | M6: Oxidation                | 550.7786  | 2 | 3.9 | 300 | 308 | No |
| VFSGLVSTGLK            | R | V | 95.00% | 27  |                              | 1107.6480 | 1 | 5.8 | 416 | 426 | No |
| VFSGLVSTGLK            | R | V | 95.00% | 80  |                              | 554.3258  | 2 | 2.1 | 416 | 426 | No |
| VNFTVDQIR              | M | A | 95.00% | 35  |                              | 1091.5870 | 1 | 1.5 | 2   | 10  | No |
| VNFTVDQIR              | M | A | 95.00% | 74  |                              | 546.2989  | 2 | 4.6 | 2   | 10  | No |
| WLPAGDALLQMITIHLPSVTAQ | R | Y | 95.00% | 72  |                              | 867.4881  | 3 | 8.1 | 343 | 366 | No |
| K                      | R | Y | 95.00% | 72  |                              | 867.4881  | 3 | 8.1 | 343 | 366 | No |
| YEWDAEAR               | K | K | 95.00% | 64  |                              | 569.7638  | 2 | 2.5 | 639 | 647 | No |



|                  |                                                                                                        |                             |                                                                                                                                                                                                                                                                                                                                                                                                                                                                                                                |                         |                                                                 |          |                                                                                                                                                                                                                                                                   |                         |                |           |        |     |     |           |    |      |     |     |    |
|------------------|--------------------------------------------------------------------------------------------------------|-----------------------------|----------------------------------------------------------------------------------------------------------------------------------------------------------------------------------------------------------------------------------------------------------------------------------------------------------------------------------------------------------------------------------------------------------------------------------------------------------------------------------------------------------------|-------------------------|-----------------------------------------------------------------|----------|-------------------------------------------------------------------------------------------------------------------------------------------------------------------------------------------------------------------------------------------------------------------|-------------------------|----------------|-----------|--------|-----|-----|-----------|----|------|-----|-----|----|
| 302              | IPI00215920                                                                                            | ARF6                        | ADP-RIBOSYLATION FACTOR 6.                                                                                                                                                                                                                                                                                                                                                                                                                                                                                     | QDLPNAMNAEITDK          | K                                                               | L        | 95.00%                                                                                                                                                                                                                                                            | 84                      | M7: Oxidation  | 823.8947  | 2      | 7.2 | 128 | 142       | No |      |     |     |    |
|                  |                                                                                                        |                             |                                                                                                                                                                                                                                                                                                                                                                                                                                                                                                                | DAILIFANK               | R                                                               | Q        | 95.00%                                                                                                                                                                                                                                                            | 57                      |                | 559.3385  | 2      | 6.1 | 114 | 123       | No |      |     |     |    |
| 303              | IPI00215983                                                                                            | CA1                         | CARBONIC ANHYDRASE 1.                                                                                                                                                                                                                                                                                                                                                                                                                                                                                          | FNVWVGGQDK              | K                                                               | I        | 95.00%                                                                                                                                                                                                                                                            | 30                      |                | 632.8047  | 2      | 4.2 | 59  | 69        | No |      |     |     |    |
|                  |                                                                                                        |                             |                                                                                                                                                                                                                                                                                                                                                                                                                                                                                                                | ILMLGLDAAGK             | R                                                               | T        | 95.00%                                                                                                                                                                                                                                                            | 57                      | M3: Oxidation  | 559.3232  | 2      | 8.2 | 16  | 26        | No |      |     |     |    |
|                  |                                                                                                        |                             |                                                                                                                                                                                                                                                                                                                                                                                                                                                                                                                | ADGLAVIGVLMK            | K                                                               | V        | 95.00%                                                                                                                                                                                                                                                            | 93                      | M11: Oxidation | 601.8507  | 2      | 9.5 | 139 | 150       | No |      |     |     |    |
|                  |                                                                                                        |                             |                                                                                                                                                                                                                                                                                                                                                                                                                                                                                                                | ADGLAVIGVLMK            | K                                                               | V        | 95.00%                                                                                                                                                                                                                                                            | 100                     |                | 593.8514  | 2      | 6.6 | 139 | 150       | No |      |     |     |    |
|                  |                                                                                                        |                             |                                                                                                                                                                                                                                                                                                                                                                                                                                                                                                                | EIINVGHSHFVNFDNDNR      | K                                                               | S        | 95.00%                                                                                                                                                                                                                                                            | 39                      |                | 752.6901  | 3      | 5.2 | 59  | 77        | No |      |     |     |    |
|                  |                                                                                                        |                             |                                                                                                                                                                                                                                                                                                                                                                                                                                                                                                                | ESISVSSEQLAQFR          | K                                                               | S        | 95.00%                                                                                                                                                                                                                                                            | 84                      |                | 790.9055  | 2      | 7.2 | 215 | 228       | No |      |     |     |    |
|                  |                                                                                                        |                             |                                                                                                                                                                                                                                                                                                                                                                                                                                                                                                                | GGPFSDSYR               | K                                                               | L        | 95.00%                                                                                                                                                                                                                                                            | 54                      |                | 493.2258  | 2      | 5.9 | 82  | 90        | No |      |     |     |    |
|                  |                                                                                                        |                             |                                                                                                                                                                                                                                                                                                                                                                                                                                                                                                                | HDTSLKPISVSNYPATAK      | K                                                               | E        | 95.00%                                                                                                                                                                                                                                                            | 122                     |                | 965.0136  | 2      | 5.8 | 41  | 58        | No |      |     |     |    |
|                  |                                                                                                        |                             |                                                                                                                                                                                                                                                                                                                                                                                                                                                                                                                | HDTSLKPISVSNYPATAK      | K                                                               | E        | 95.00%                                                                                                                                                                                                                                                            | 62                      |                | 643.6764  | 3      | 2.8 | 41  | 58        | No |      |     |     |    |
|                  |                                                                                                        |                             |                                                                                                                                                                                                                                                                                                                                                                                                                                                                                                                | HDTSLKPISVSNYPATAK      | K                                                               | E        | 95.00%                                                                                                                                                                                                                                                            | 35                      |                | 483.0108  | 4      | 5.9 | 41  | 58        | No |      |     |     |    |
|                  |                                                                                                        |                             |                                                                                                                                                                                                                                                                                                                                                                                                                                                                                                                | LFQFHFHWGSTNEHGSEHTVD   |                                                                 |          |                                                                                                                                                                                                                                                                   |                         |                |           |        |     |     |           |    |      |     |     |    |
|                  |                                                                                                        |                             |                                                                                                                                                                                                                                                                                                                                                                                                                                                                                                                | GVK                     | R                                                               | Y        | 95.00%                                                                                                                                                                                                                                                            | 66                      |                | 932.7776  | 3      | 9.2 | 91  | 114       | No |      |     |     |    |
|                  |                                                                                                        |                             |                                                                                                                                                                                                                                                                                                                                                                                                                                                                                                                | LYPIANGNNQSPVDIK        | K                                                               | T        | 95.00%                                                                                                                                                                                                                                                            | 68                      |                | 871.9626  | 2      | 5.5 | 20  | 35        | No |      |     |     |    |
|                  |                                                                                                        |                             |                                                                                                                                                                                                                                                                                                                                                                                                                                                                                                                | TSETKHDTSLKPISVSNYPATAK | K                                                               | E        | 95.00%                                                                                                                                                                                                                                                            | 47                      |                | 825.7691  | 3      | 7.6 | 36  | 58        | No |      |     |     |    |
|                  |                                                                                                        |                             |                                                                                                                                                                                                                                                                                                                                                                                                                                                                                                                | VLDALQAIK               | K                                                               | T        | 95.00%                                                                                                                                                                                                                                                            | 38                      |                | 970.5989  | 1      | 5.1 | 161 | 169       | No |      |     |     |    |
|                  |                                                                                                        |                             |                                                                                                                                                                                                                                                                                                                                                                                                                                                                                                                | VLDALQAIK               | K                                                               | T        | 95.00%                                                                                                                                                                                                                                                            | 79                      |                | 485.8031  | 2      | 4.7 | 161 | 169       | No |      |     |     |    |
|                  |                                                                                                        |                             |                                                                                                                                                                                                                                                                                                                                                                                                                                                                                                                | YSAELHVAHWNSAK          | K                                                               | Y        | 95.00%                                                                                                                                                                                                                                                            | 78                      |                | 806.9012  | 2      | 4.7 | 115 | 128       | No |      |     |     |    |
| YSAELHVAHWNSAK   | K                                                                                                      | Y                           | 95.00%                                                                                                                                                                                                                                                                                                                                                                                                                                                                                                         | 31                      |                                                                 | 538.2705 | 3                                                                                                                                                                                                                                                                 | 5.3                     | 115            | 128       | No     |     |     |           |    |      |     |     |    |
| YSSLAEAAASK      | K                                                                                                      | A                           | 95.00%                                                                                                                                                                                                                                                                                                                                                                                                                                                                                                         | 64                      |                                                                 | 513.7616 | 2                                                                                                                                                                                                                                                                 | 4.5                     | 129            | 138       | No     |     |     |           |    |      |     |     |    |
| 304              | IPI00024145; IPI00216024; IPI00216026; IPI00216027; IPI00411815; IPI00455531; IPI00718908; IPI00737171 | LOC647153; LOC729317; VDAC2 | ISOFORM 1 OF VOLTAGE-DEPENDENT ANION-SELECTIVE CHANNEL PROTEIN 2.; ISOFORM 2 OF VOLTAGE-DEPENDENT ANION-SELECTIVE CHANNEL PROTEIN 2.; ISOFORM 3 OF VOLTAGE-DEPENDENT ANION-SELECTIVE CHANNEL PROTEIN 2.; ISOFORM 4 OF VOLTAGE-DEPENDENT ANION-SELECTIVE CHANNEL PROTEIN 2.; ISOFORM 5 OF VOLTAGE-DEPENDENT ANION-SELECTIVE CHANNEL PROTEIN 2.; SIMILAR TO VOLTAGE-DEPENDENT ANION CHANNEL 2.; ISOFORM 6 OF VOLTAGE-DEPENDENT ANION-SELECTIVE CHANNEL PROTEIN 2.; SIMILAR TO VOLTAGE-DEPENDENT ANION CHANNEL 2. | GFGFGLVK                | K                                                               | L        | 95.00%                                                                                                                                                                                                                                                            | 39                      |                | 412.7397  | 2      | 5.3 | 47  | 54        | No |      |     |     |    |
|                  |                                                                                                        |                             |                                                                                                                                                                                                                                                                                                                                                                                                                                                                                                                | LTFDITTFSPNTGK          | K                                                               | K        | 95.00%                                                                                                                                                                                                                                                            | 90                      |                | 714.8581  | 2      | 5.0 | 123 | 135       | No |      |     |     |    |
|                  |                                                                                                        |                             |                                                                                                                                                                                                                                                                                                                                                                                                                                                                                                                | LTFDITTFSPNTGKK         | K                                                               | S        | 95.00%                                                                                                                                                                                                                                                            | 61                      |                | 778.9078  | 2      | 7.4 | 123 | 136       | No |      |     |     |    |
|                  |                                                                                                        |                             |                                                                                                                                                                                                                                                                                                                                                                                                                                                                                                                | LTLALVDGK               | K                                                               | S        | 95.00%                                                                                                                                                                                                                                                            | 35                      |                | 1016.6080 | 1      | 8.5 | 267 | 276       | No |      |     |     |    |
|                  |                                                                                                        |                             |                                                                                                                                                                                                                                                                                                                                                                                                                                                                                                                | LTLALVDGK               | K                                                               | S        | 95.00%                                                                                                                                                                                                                                                            | 82                      |                | 508.8065  | 2      | 5.7 | 267 | 276       | No |      |     |     |    |
|                  |                                                                                                        |                             |                                                                                                                                                                                                                                                                                                                                                                                                                                                                                                                | NNFAVGYR                | R                                                               | T        | 95.00%                                                                                                                                                                                                                                                            | 39                      |                | 470.7397  | 2      | 8.0 | 193 | 200       | No |      |     |     |    |
|                  |                                                                                                        |                             |                                                                                                                                                                                                                                                                                                                                                                                                                                                                                                                | TGDFQLHTNVNDGTEFGGSIYQ  |                                                                 |          |                                                                                                                                                                                                                                                                   |                         |                |           |        |     |     |           |    |      |     |     |    |
|                  |                                                                                                        |                             |                                                                                                                                                                                                                                                                                                                                                                                                                                                                                                                | K                       | R                                                               | V        | 95.00%                                                                                                                                                                                                                                                            | 63                      |                | 843.4011  | 3      | 7.2 | 201 | 223       | No |      |     |     |    |
|                  |                                                                                                        |                             |                                                                                                                                                                                                                                                                                                                                                                                                                                                                                                                | VNSSLIGVGYTQTLRPGVK     | K                                                               | L        | 95.00%                                                                                                                                                                                                                                                            | 116                     |                | 1052.0920 | 2      | 9.2 | 263 | 282       | No |      |     |     |    |
|                  |                                                                                                        |                             |                                                                                                                                                                                                                                                                                                                                                                                                                                                                                                                | VNSSLIGVGYTQTLRPGVK     | K                                                               | L        | 95.00%                                                                                                                                                                                                                                                            | 47                      |                | 701.7303  | 3      | 9.1 | 263 | 282       | No |      |     |     |    |
|                  |                                                                                                        |                             |                                                                                                                                                                                                                                                                                                                                                                                                                                                                                                                | YQLDPTASISAK            | K                                                               | V        | 95.00%                                                                                                                                                                                                                                                            | 88                      |                | 647.3431  | 2      | 7.2 | 251 | 262       | No |      |     |     |    |
|                  |                                                                                                        |                             |                                                                                                                                                                                                                                                                                                                                                                                                                                                                                                                | 305                     | IPI00216049; IPI00216746; IPI00514561; IPI00647717; IPI00807545 | HNRPK    | ISOFORM 1 OF HETEROGENEOUS NUCLEAR RIBONUCLEOPROTEIN K.; ISOFORM 2 OF HETEROGENEOUS NUCLEAR RIBONUCLEOPROTEIN K.; HETEROGENEOUS NUCLEAR RIBONUCLEOPROTEIN K.; HETEROGENEOUS NUCLEAR RIBONUCLEOPROTEIN K.; ISOFORM 3 OF HETEROGENEOUS NUCLEAR RIBONUCLEOPROTEIN K. | GSYDGLGGPIITQVTIPK      | R              | D         | 95.00% | 87  |     | 959.0291  | 2  | 8.7  | 378 | 396 | No |
|                  |                                                                                                        |                             |                                                                                                                                                                                                                                                                                                                                                                                                                                                                                                                |                         |                                                                 |          |                                                                                                                                                                                                                                                                   | IDEPLEGSEDR             | K              | I         | 95.00% | 79  |     | 630.2971  | 2  | 8.4  | 423 | 433 | No |
|                  |                                                                                                        |                             |                                                                                                                                                                                                                                                                                                                                                                                                                                                                                                                |                         |                                                                 |          |                                                                                                                                                                                                                                                                   | IILDISESPIK             | K              | G         | 95.00% | 86  |     | 670.9098  | 2  | 5.6  | 208 | 219 | No |
|                  |                                                                                                        |                             |                                                                                                                                                                                                                                                                                                                                                                                                                                                                                                                |                         |                                                                 |          |                                                                                                                                                                                                                                                                   | IITITGTQDQIQNAQYLLQNSVK | R              | Q         | 95.00% | 70  |     | 863.8082  | 3  | 7.7  | 434 | 456 | No |
|                  |                                                                                                        |                             |                                                                                                                                                                                                                                                                                                                                                                                                                                                                                                                |                         |                                                                 |          |                                                                                                                                                                                                                                                                   | ILSISADIETIGEILKK       | R              | I         | 95.00% | 36  |     | 615.0361  | 3  | 7.1  | 87  | 103 | No |
|                  |                                                                                                        |                             |                                                                                                                                                                                                                                                                                                                                                                                                                                                                                                                |                         |                                                                 |          |                                                                                                                                                                                                                                                                   | LLIHQSLAGGIIGVK         | R              | G         | 95.00% | 48  |     | 759.9764  | 2  | 5.0  | 149 | 163 | No |
| LLIHQSLAGGIIGVK  | R                                                                                                      | G                           | 95.00%                                                                                                                                                                                                                                                                                                                                                                                                                                                                                                         |                         |                                                                 |          |                                                                                                                                                                                                                                                                   | 59                      |                | 506.9865  | 3      | 4.3 | 149 | 163       | No |      |     |     |    |
| RPAEDMEEEQAFKR   | K                                                                                                      | S                           | 95.00%                                                                                                                                                                                                                                                                                                                                                                                                                                                                                                         |                         |                                                                 |          |                                                                                                                                                                                                                                                                   | 60                      | M6: Oxidation  | 584.6085  | 3      | 4.2 | 22  | 35        | No |      |     |     |    |
| TDYNASVSPDSSGPER | R                                                                                                      | I                           | 95.00%                                                                                                                                                                                                                                                                                                                                                                                                                                                                                                         |                         |                                                                 |          |                                                                                                                                                                                                                                                                   | 76                      |                | 890.9101  | 2      | 7.5 | 70  | 86        | No |      |     |     |    |
| VVLIGGKPR        | R                                                                                                      | V                           | 95.00%                                                                                                                                                                                                                                                                                                                                                                                                                                                                                                         |                         |                                                                 |          |                                                                                                                                                                                                                                                                   | 28                      |                | 527.3275  | 2      | 4.5 | 168 | 177       | No |      |     |     |    |
| 306              | IPI00216070                                                                                            | MYL1                        | MYOSIN LIGHT CHAIN 1, SKELETAL MUSCLE ISOFORM.                                                                                                                                                                                                                                                                                                                                                                                                                                                                 |                         |                                                                 |          |                                                                                                                                                                                                                                                                   | ALGTNPNTAEVR            | R              | K         | 95.00% | 35  |     | 1242.6530 | 1  | 7.3  | 81  | 92  | No |
|                  |                                                                                                        |                             |                                                                                                                                                                                                                                                                                                                                                                                                                                                                                                                |                         |                                                                 |          |                                                                                                                                                                                                                                                                   | ALGTNPNTAEVR            | R              | K         | 95.00% | 85  |     | 621.8251  | 2  | -1.7 | 81  | 92  | No |
|                  |                                                                                                        |                             |                                                                                                                                                                                                                                                                                                                                                                                                                                                                                                                |                         |                                                                 |          |                                                                                                                                                                                                                                                                   | ALGTNPNTAEVRK           | R              | V         | 95.00% | 75  |     | 685.8757  | 2  | 3.1  | 81  | 93  | No |
|                  |                                                                                                        |                             |                                                                                                                                                                                                                                                                                                                                                                                                                                                                                                                |                         |                                                                 |          |                                                                                                                                                                                                                                                                   | DQATYEDFVEGLR           | K              | V         | 95.00% | 108 |     | 771.8641  | 2  | 8.2  | 125 | 137 | No |
|                  |                                                                                                        |                             |                                                                                                                                                                                                                                                                                                                                                                                                                                                                                                                |                         |                                                                 |          |                                                                                                                                                                                                                                                                   | DQATYEDFVEGLR           | K              | V         | 95.00% | 68  |     | 514.9119  | 3  | 8.1  | 125 | 137 | No |



|     |                                                                 |        |                                                                      |                                                                                                                                                                                                                                                                                                  |                |   |        |        |                    |           |          |      |     |     |     |    |
|-----|-----------------------------------------------------------------|--------|----------------------------------------------------------------------|--------------------------------------------------------------------------------------------------------------------------------------------------------------------------------------------------------------------------------------------------------------------------------------------------|----------------|---|--------|--------|--------------------|-----------|----------|------|-----|-----|-----|----|
|     |                                                                 |        |                                                                      | IDAAEEEEKYDMEVR                                                                                                                                                                                                                                                                                  | K              | V | 95.00% | 52     | M11: Oxidation     | 571.9301  | 3        | 6.1  | 72  | 85  | No  |    |
|     |                                                                 |        |                                                                      | LFDLR                                                                                                                                                                                                                                                                                            | K              | G | 95.00% | 31     |                    | 663.3881  | 1        | 7.5  | 100 | 104 | No  |    |
|     |                                                                 |        |                                                                      | MSADAMLK                                                                                                                                                                                                                                                                                         | R              | A | 95.00% | 42     | M1: Oxidation, M6: | 449.7077  | 2        | 6.7  | 117 | 124 | No  |    |
|     |                                                                 |        |                                                                      | SVMLQIAATELEK                                                                                                                                                                                                                                                                                    | K              | E | 95.00% | 98     | Oxidation          | 724.8818  | 2        | -7.8 | 20  | 32  | No  |    |
|     |                                                                 |        |                                                                      | SVMLQIAATELEK                                                                                                                                                                                                                                                                                    | K              | E | 95.00% | 105    | M3: Oxidation      | 716.8961  | 2        | 8.3  | 20  | 32  | No  |    |
|     |                                                                 |        |                                                                      | SVMLQIAATELEKEESR                                                                                                                                                                                                                                                                                | K              | R | 95.00% | 35     | M3: Oxidation      | 975.4903  | 2        | -6.5 | 20  | 36  | No  |    |
|     |                                                                 |        |                                                                      | SVMLQIAATELEKEESR                                                                                                                                                                                                                                                                                | K              | R | 95.00% | 58     | M3: Oxidation      | 650.6725  | 3        | 8.5  | 20  | 36  | No  |    |
|     |                                                                 |        |                                                                      | SVMLQIAATELEKEESRR                                                                                                                                                                                                                                                                               | K              | E | 95.00% | 43     |                    | 697.3733  | 3        | 6.2  | 20  | 37  | No  |    |
|     |                                                                 |        |                                                                      | YDMEVR                                                                                                                                                                                                                                                                                           | K              | V | 95.00% | 33     | M3: Oxidation      | 414.6839  | 2        | 4.6  | 80  | 85  | No  |    |
| 309 | IPI00216298; IPI00382841; IPI00552768                           | TXN    | THIOREDOXIN.; THIOREDOXIN DELTA 3 (FRAGMENT).; THIOREDOXIN.          | EKLEATINELV                                                                                                                                                                                                                                                                                      | K              | - | 95.00% | 31     |                    | 629.8534  | 2        | 7.4  | 95  | 105 | No  |    |
|     |                                                                 |        |                                                                      | LEATINELV                                                                                                                                                                                                                                                                                        | K              | - | 95.00% | 34     |                    | 501.2842  | 2        | 8.6  | 97  | 105 | No  |    |
|     |                                                                 |        |                                                                      | TAFQEALDAAGDK                                                                                                                                                                                                                                                                                    | K              | L | 95.00% | 92     |                    | 668.8270  | 2        | 5.6  | 9   | 21  | No  |    |
| 310 | IPI00216308                                                     | VDAC1  | VOLTAGE-DEPENDENT ANION-SELECTIVE CHANNEL PROTEIN 1.                 | GYGFGLIK                                                                                                                                                                                                                                                                                         | K              | L | 95.00% | 44     |                    | 427.7450  | 2        | 5.2  | 21  | 28  | No  |    |
|     |                                                                 |        |                                                                      | KLETAVNLAWTAGNSNTR                                                                                                                                                                                                                                                                               | K              | F | 95.00% | 33     |                    | 649.3475  | 3        | 8.9  | 201 | 218 | No  |    |
|     |                                                                 |        |                                                                      | LETAVNLAWTAGNSNTR                                                                                                                                                                                                                                                                                | K              | F | 95.00% | 111    |                    | 909.4702  | 2        | 9.9  | 202 | 218 | No  |    |
|     |                                                                 |        |                                                                      | LGLGLEFQA                                                                                                                                                                                                                                                                                        | K              | - | 95.00% | 47     |                    | 474.2668  | 2        | 5.7  | 275 | 283 | No  |    |
|     |                                                                 |        |                                                                      | LTFDSSFSPNTGK                                                                                                                                                                                                                                                                                    | K              | K | 95.00% | 94     |                    | 700.8437  | 2        | 6.9  | 97  | 109 | No  |    |
|     |                                                                 |        |                                                                      | LTFDSSFSPNTGKK                                                                                                                                                                                                                                                                                   | K              | N | 95.00% | 57     |                    | 764.8921  | 2        | 7.6  | 97  | 110 | No  |    |
|     |                                                                 |        |                                                                      | LTFDSSFSPNTGKK                                                                                                                                                                                                                                                                                   | K              | N | 95.00% | 44     |                    | 510.2621  | 3        | 3.8  | 97  | 110 | No  |    |
|     |                                                                 |        |                                                                      | LTLALLDGK                                                                                                                                                                                                                                                                                        | K              | N | 95.00% | 36     |                    | 1030.6240 | 1        | 8.5  | 257 | 266 | No  |    |
|     |                                                                 |        |                                                                      | LTLALLDGK                                                                                                                                                                                                                                                                                        | K              | N | 95.00% | 88     |                    | 515.8147  | 2        | 6.3  | 257 | 266 | No  |    |
|     |                                                                 |        |                                                                      | SENGLEFTSSGSANTETTK                                                                                                                                                                                                                                                                              | K              | V | 95.00% | 110    |                    | 980.4501  | 2        | 7.1  | 35  | 53  | No  |    |
|     |                                                                 |        |                                                                      | TDEFQLHTNVNDGTEFGGSYQ                                                                                                                                                                                                                                                                            | K              | V | 95.00% | 60     |                    | 867.4102  | 3        | 9.4  | 175 | 197 | No  |    |
|     |                                                                 |        |                                                                      | K                                                                                                                                                                                                                                                                                                | K              | V | 95.00% | 49     |                    | 730.3508  | 3        | 7.2  | 33  | 53  | No  |    |
|     |                                                                 |        |                                                                      | TKSENGLEFTSSGSANTETTK                                                                                                                                                                                                                                                                            | K              | V | 95.00% | 49     |                    | 1052.1020 | 2        | 6.7  | 237 | 256 | No  |    |
|     |                                                                 |        |                                                                      | VNNSLIGLGYTQTLKPGIK                                                                                                                                                                                                                                                                              | K              | L | 95.00% | 52     |                    | 701.7365  | 3        | 5.8  | 237 | 256 | No  |    |
|     |                                                                 |        |                                                                      | VNNSLIGLGYTQTLKPGIK                                                                                                                                                                                                                                                                              | K              | L | 95.00% | 49     |                    | 417.7357  | 2        | 7.5  | 54  | 61  | No  |    |
|     |                                                                 |        |                                                                      | VTGSLETK                                                                                                                                                                                                                                                                                         | K              | Y | 95.00% | 40     |                    | 1213.6140 | 1        | -6.2 | 164 | 174 | No  |    |
|     |                                                                 |        |                                                                      | VTQSNFAVGYK                                                                                                                                                                                                                                                                                      | R              | T | 95.00% | 44     |                    | 607.3187  | 2        | 6.5  | 164 | 174 | No  |    |
|     |                                                                 |        |                                                                      | VTQSNFAVGYK                                                                                                                                                                                                                                                                                      | R              | T | 95.00% | 72     |                    | 726.0294  | 3        | 9.2  | 75  | 93  | No  |    |
|     |                                                                 |        |                                                                      | WNTDNTLGTETVEDQLAR                                                                                                                                                                                                                                                                               | K              | G | 95.00% | 50     |                    | 687.8386  | 2        | 8.1  | 64  | 74  | No  |    |
|     |                                                                 |        |                                                                      | WTEYGLTFTEK                                                                                                                                                                                                                                                                                      | R              | W | 95.00% | 65     |                    |           |          |      |     |     |     |    |
|     |                                                                 |        |                                                                      | ISOFORM 2C OF CYTOPLASMIC DYNEIN 1 INTERMEDIATE CHAIN 2.; ISOFORM 2B OF CYTOPLASMIC DYNEIN 1 INTERMEDIATE CHAIN 2.; ISOFORM 2A OF CYTOPLASMIC DYNEIN 1 INTERMEDIATE CHAIN 2.; ISOFORM 2F OF CYTOPLASMIC DYNEIN 1 INTERMEDIATE CHAIN 2.; ISOFORM 2E OF CYTOPLASMIC DYNEIN 1 INTERMEDIATE CHAIN 2. | DLEDKEGEIQAGAK | R | L      | 95.00% | 45                 |           | 751.8776 | 2    | 8.9 | 225 | 238 | No |
| 311 | IPI00216348; IPI00302712; IPI00744015; IPI00827813; IPI00827859 | DYNC12 |                                                                      | SVSTPSEAGSQDSGDGAVGSR                                                                                                                                                                                                                                                                            | K              | R | 95.00% | 129    |                    | 975.9449  | 2        | 9.3  | 86  | 106 | No  |    |
| 312 | IPI00216461; IPI00784259                                        | ACYP2  | ACYLPHOSPHATASE-2.; ACYLPHOSPHATASE, MUSCLE TYPE ISOZYME.            | GTVTGQVQGPEDK                                                                                                                                                                                                                                                                                    | K              | V | 95.00% | 78     |                    | 658.3343  | 2        | 8.5  | 46  | 58  | No  |    |
|     |                                                                 |        |                                                                      | GTVTGQVQGPEDKVNSMK                                                                                                                                                                                                                                                                               | K              | S | 95.00% | 37     | M17: Oxidation     | 945.9745  | 2        | 9.6  | 46  | 63  | No  |    |
|     |                                                                 |        |                                                                      | GTVTGQVQGPEDKVNSMK                                                                                                                                                                                                                                                                               | K              | S | 95.00% | 48     | M17: Oxidation     | 630.9839  | 3        | 6.8  | 46  | 63  | No  |    |
|     |                                                                 |        |                                                                      | IGVVGWVK                                                                                                                                                                                                                                                                                         | K              | N | 95.00% | 40     |                    | 429.2682  | 2        | 4.2  | 34  | 41  | No  |    |
|     |                                                                 |        |                                                                      | KIGVVGWVK                                                                                                                                                                                                                                                                                        | R              | N | 95.00% | 39     |                    | 493.3156  | 2        | 3.5  | 33  | 41  | No  |    |
|     |                                                                 |        |                                                                      | LEYSNFSIR                                                                                                                                                                                                                                                                                        | K              | - | 95.00% | 65     |                    | 564.7917  | 2        | 5.9  | 90  | 98  | No  |    |
|     |                                                                 |        |                                                                      | SVDYEVFGR                                                                                                                                                                                                                                                                                        | K              | V | 95.00% | 79     |                    | 536.2623  | 2        | 5.2  | 9   | 17  | No  |    |
| 313 | IPI00216798                                                     | MYL2   | MYOSIN REGULATORY LIGHT CHAIN 2, VENTRICULAR/CARDIAC MUSCLE ISOFORM. | AGGANSNVFSMFEQTQIQEFK                                                                                                                                                                                                                                                                            | R              | E | 95.00% | 104    | M11: Oxidation     | 1175.0540 | 2        | 7.5  | 10  | 30  | No  |    |
|     |                                                                 |        |                                                                      | AGGANSNVFSMFEQTQIQEFK                                                                                                                                                                                                                                                                            | R              | E | 95.00% | 100    |                    | 1167.0580 | 2        | 9.0  | 10  | 30  | No  |    |
|     |                                                                 |        |                                                                      | AGGANSNVFSMFEQTQIQEFK                                                                                                                                                                                                                                                                            | R              | E | 95.00% | 70     |                    | 778.3743  | 3        | 8.7  | 10  | 30  | No  |    |
|     |                                                                 |        |                                                                      | DGFIDKNDLR                                                                                                                                                                                                                                                                                       | R              | D | 95.00% | 61     |                    | 596.8033  | 2        | 1.8  | 41  | 50  | No  |    |
|     |                                                                 |        |                                                                      | DTFAALGR                                                                                                                                                                                                                                                                                         | R              | V | 95.00% | 34     |                    | 850.4471  | 1        | 5.5  | 51  | 58  | No  |    |
|     |                                                                 |        |                                                                      | DTFAALGR                                                                                                                                                                                                                                                                                         | R              | V | 95.00% | 59     |                    | 425.7263  | 2        | 2.7  | 51  | 58  | No  |    |
|     |                                                                 |        |                                                                      | EAFITMDQNR                                                                                                                                                                                                                                                                                       | K              | D | 95.00% | 72     | M6: Oxidation      | 620.7865  | 2        | 1.6  | 31  | 40  | No  |    |
|     |                                                                 |        |                                                                      | EAFITMDQNR                                                                                                                                                                                                                                                                                       | K              | D | 95.00% | 57     |                    | 1224.5770 | 1        | 7.2  | 31  | 40  | No  |    |
|     |                                                                 |        |                                                                      | EAFITMDQNR                                                                                                                                                                                                                                                                                       | K              | D | 95.00% | 83     |                    | 612.7910  | 2        | 4.8  | 31  | 40  | No  |    |
|     |                                                                 |        |                                                                      | EAPGPINFTVFLTMFGEK                                                                                                                                                                                                                                                                               | K              | L | 95.00% | 83     | M14: Oxidation     | 1007.5140 | 2        | 9.8  | 72  | 89  | No  |    |
|     |                                                                 |        |                                                                      | EAPGPINFTVFLTMFGEK                                                                                                                                                                                                                                                                               | K              | L | 95.00% | 51     | M14: Oxidation     | 672.0098  | 3        | 7.0  | 72  | 89  | No  |    |
|     |                                                                 |        |                                                                      | EAPGPINFTVFLTMFGEK                                                                                                                                                                                                                                                                               | K              | L | 95.00% | 103    |                    | 999.5148  | 2        | 8.5  | 72  | 89  | No  |    |
|     |                                                                 |        |                                                                      | EAPGPINFTVFLTMFGEK                                                                                                                                                                                                                                                                               | K              | L | 95.00% | 65     |                    | 666.6785  | 3        | 7.6  | 72  | 89  | No  |    |
|     |                                                                 |        |                                                                      | EEVDQMFAAFPDPVTGNLDYK                                                                                                                                                                                                                                                                            | K              | N | 95.00% | 81     |                    | 1193.5520 | 2        | 1.7  | 133 | 153 | No  |    |

|  |  |  |  |                        |   |   |        |     |                |           |   |     |     |     |    |
|--|--|--|--|------------------------|---|---|--------|-----|----------------|-----------|---|-----|-----|-----|----|
|  |  |  |  | EMLTTQAE               | R | F | 95.00% | 35  | M2: Oxidation  | 1094.5220 | 1 | 6.2 | 121 | 129 | No |
|  |  |  |  | EMLTTQAE               | R | F | 95.00% | 66  | M2: Oxidation  | 547.7621  | 2 | 1.1 | 121 | 129 | No |
|  |  |  |  | EMLTTQAE               | R | F | 95.00% | 45  |                | 1078.5270 | 1 | 6.5 | 121 | 129 | No |
|  |  |  |  | EMLTTQAE               | R | F | 95.00% | 58  |                | 539.7667  | 2 | 4.9 | 121 | 129 | No |
|  |  |  |  | FSKEEVDQMFAAFPDPVTGNLD |   |   |        |     |                |           |   |     |     |     |    |
|  |  |  |  | YK                     | R | N | 95.00% | 56  | M9: Oxidation  | 922.1069  | 3 | 8.5 | 130 | 153 | No |
|  |  |  |  | FSKEEVDQMFAAFPDPVTGNLD |   |   |        |     |                |           |   |     |     |     |    |
|  |  |  |  | YK                     | R | N | 95.00% | 65  |                | 916.7746  | 3 | 7.7 | 130 | 153 | No |
|  |  |  |  | FSKEEVDQMFAAFPDPVTGNLD |   |   |        |     |                |           |   |     |     |     |    |
|  |  |  |  | YK                     | R | N | 95.00% | 56  |                | 687.8342  | 4 | 9.6 | 130 | 153 | No |
|  |  |  |  | GADPEETILNAFK          | K | V | 95.00% | 89  |                | 702.8598  | 2 | 7.5 | 92  | 104 | No |
|  |  |  |  | GADPEETILNAFK          | K | V | 95.00% | 50  |                | 468.9075  | 3 | 3.9 | 92  | 104 | No |
|  |  |  |  | LKGADPEETILNAFK        | K | V | 95.00% | 91  |                | 823.4513  | 2 | 8.8 | 90  | 104 | No |
|  |  |  |  | LKGADPEETILNAFK        | K | V | 95.00% | 53  |                | 549.3019  | 3 | 5.9 | 90  | 104 | No |
|  |  |  |  | NEEIDEMIK              | K | E | 95.00% | 40  | M7: Oxidation  | 1136.5260 | 1 | 9.7 | 63  | 71  | No |
|  |  |  |  | NEEIDEMIK              | K | E | 95.00% | 59  | M7: Oxidation  | 568.7621  | 2 | 1.5 | 63  | 71  | No |
|  |  |  |  | NEEIDEMIK              | K | E | 95.00% | 54  |                | 1120.5300 | 1 | 9.2 | 63  | 71  | No |
|  |  |  |  | NEEIDEMIK              | K | E | 95.00% | 57  |                | 560.7668  | 2 | 5.3 | 63  | 71  | No |
|  |  |  |  | NLVHIITHGEEK           | K | - | 95.00% | 64  |                | 695.3842  | 2 | 8.1 | 154 | 165 | No |
|  |  |  |  | NLVHIITHGEEK           | K | - | 95.00% | 31  |                | 463.9243  | 3 | 5.7 | 154 | 165 | No |
|  |  |  |  | NLVHIITHGEEKD          | K | - | 95.00% | 78  |                | 752.8939  | 2 | 2.5 | 154 | 166 | No |
|  |  |  |  | NLVHIITHGEEKD          | K | - | 95.00% | 53  |                | 502.2667  | 3 | 5.4 | 154 | 166 | No |
|  |  |  |  | RAGGANSNVFSMFEQTQIQEFK | K | E | 95.00% | 50  | M12: Oxidation | 835.7394  | 3 | 7.7 | 9   | 30  | No |
|  |  |  |  | VNVKNEEIDEMIK          | R | E | 95.00% | 81  | M11: Oxidation | 788.9020  | 2 | 4.3 | 59  | 71  | No |
|  |  |  |  | VNVKNEEIDEMIK          | R | E | 95.00% | 53  | M11: Oxidation | 526.2698  | 3 | 2.9 | 59  | 71  | No |
|  |  |  |  | VNVKNEEIDEMIK          | R | E | 95.00% | 74  |                | 780.9063  | 2 | 6.6 | 59  | 71  | No |
|  |  |  |  | VNVKNEEIDEMIK          | R | E | 95.00% | 36  |                | 520.9394  | 3 | 5.1 | 59  | 71  | No |
|  |  |  |  | DGIAVIGIFLK            | R | I | 95.00% | 58  |                | 1145.7020 | 1 | 7.5 | 138 | 148 | No |
|  |  |  |  | DGIAVIGIFLK            | R | I | 95.00% | 70  |                | 573.3542  | 2 | 6.1 | 138 | 148 | No |
|  |  |  |  | DIRHDSLQPWVSVYDGGSAK   | K | T | 95.00% | 72  |                | 772.3803  | 3 | 8.3 | 37  | 57  | No |
|  |  |  |  | EPMTVSSDQMAK           | K | L | 95.00% | 38  | M10: Oxidation | 670.3014  | 2 | 5.7 | 213 | 224 | No |
|  |  |  |  | EPMTVSSDQMAK           | K | L | 95.00% | 48  | M3: Oxidation  | 670.3012  | 2 | 5.4 | 213 | 224 | No |
|  |  |  |  | EPMTVSSDQMAK           | K | L | 95.00% | 61  | M3: Oxidation  | 678.2995  | 2 | 6.6 | 213 | 224 | No |
|  |  |  |  | EPMTVSSDQMAK           | K | L | 95.00% | 61  | M3: Oxidation, | 678.2995  | 2 | 6.6 | 213 | 224 | No |
|  |  |  |  | EPMTVSSDQMAK           | K | L | 95.00% | 64  | M10: Oxidation | 662.3040  | 2 | 5.7 | 213 | 224 | No |
|  |  |  |  | EWGYASHNGPDHWHELFPNAK  | K | G | 95.00% | 48  |                | 831.3845  | 3 | 8.3 | 4   | 24  | No |
|  |  |  |  | GENQSPVELHTK           | K | D | 95.00% | 75  |                | 669.8392  | 2 | 3.8 | 25  | 36  | No |
|  |  |  |  | GENQSPVELHTK           | K | D | 95.00% | 40  |                | 446.8968  | 3 | 6.8 | 25  | 36  | No |
|  |  |  |  | GGPLPGPYR              | R | L | 95.00% | 43  |                | 457.2508  | 2 | 4.4 | 81  | 89  | No |
|  |  |  |  | HDPQLQPWVSVYDGGSAK     | R | T | 95.00% | 31  | S9: Phospho    | 1005.9440 | 2 | 9.7 | 40  | 57  | No |
|  |  |  |  | HDPQLQPWVSVYDGGSAK     | R | T | 95.00% | 132 |                | 965.9564  | 2 | 5.9 | 40  | 57  | No |
|  |  |  |  | HDPQLQPWVSVYDGGSAK     | R | T | 95.00% | 96  |                | 644.3076  | 3 | 7.0 | 40  | 57  | No |
|  |  |  |  | IGHENGEFQIFLDALDK      | K | I | 95.00% | 129 |                | 973.4946  | 2 | 7.8 | 149 | 165 | No |
|  |  |  |  | IGHENGEFQIFLDALDK      | K | I | 95.00% | 76  |                | 649.3319  | 3 | 7.2 | 149 | 165 | No |
|  |  |  |  | IGHENGEFQIFLDALDKIK    | K | T | 95.00% | 42  |                | 729.7255  | 3 | 7.1 | 149 | 167 | No |
|  |  |  |  | IGHENGEFQIFLDALDKIK    | K | T | 95.00% | 51  |                | 547.5456  | 4 | 6.3 | 149 | 167 | No |
|  |  |  |  | LRQFHLHWGSSDDHGSEHTVD  |   |   |        |     |                |           |   |     |     |     |    |
|  |  |  |  | GVK                    | R | Y | 95.00% | 62  |                | 915.4445  | 3 | 9.1 | 90  | 113 | No |
|  |  |  |  | LRQFHLHWGSSDDHGSEHTVD  |   |   |        |     |                |           |   |     |     |     |    |
|  |  |  |  | GVK                    | R | Y | 95.00% | 39  |                | 686.8351  | 4 | 8.8 | 90  | 113 | No |
|  |  |  |  | QFHLHWGSSDDHGSEHTVDGV  |   |   |        |     |                |           |   |     |     |     |    |
|  |  |  |  | K                      | R | Y | 95.00% | 61  |                | 825.7128  | 3 | 6.0 | 92  | 113 | No |
|  |  |  |  | QRDGIIVIGIFLK          | K | I | 95.00% | 38  |                | 477.2930  | 3 | 7.0 | 136 | 148 | No |
|  |  |  |  | SLLSSAENPPVPLVSNWRPPQ  |   |   |        |     |                |           |   |     |     |     |    |
|  |  |  |  | PINNR                  | R | V | 95.00% | 121 |                | 1004.5370 | 3 | 8.0 | 227 | 253 | No |
|  |  |  |  | SLLSSAENPPVPLVSNWRPPQ  |   |   |        |     |                |           |   |     |     |     |    |
|  |  |  |  | PINNR                  | R | V | 95.00% | 30  |                | 753.6547  | 4 | 8.4 | 227 | 253 | No |
|  |  |  |  | VVFDITYDR              | R | S | 95.00% | 36  |                | 1129.5230 | 1 | 5.6 | 68  | 76  | No |
|  |  |  |  | VVFDITYDR              | R | S | 95.00% | 77  |                | 565.2634  | 2 | 1.9 | 68  | 76  | No |
|  |  |  |  | YAAELHLVHWNPK          | K | Y | 95.00% | 93  |                | 789.4220  | 2 | 8.4 | 114 | 126 | No |
|  |  |  |  | YAAELHLVHWNPK          | K | Y | 95.00% | 60  |                | 526.6141  | 3 | 2.3 | 114 | 126 | No |
|  |  |  |  | LSNIFVIGK              | R | G | 95.00% | 64  |                | 495.8045  | 2 | 2.3 | 222 | 230 | No |
|  |  |  |  | VNDTIQIDLETGK          | K | I | 95.00% | 38  |                | 723.3849  | 2 | 9.0 | 156 | 168 | No |

314 IPI00216983

CA3

CARBONIC ANHYDRASE 3.

315 IPI00217030

RPS4X

40S RIBOSOMAL PROTEIN S4, X ISOFORM.



|                                                                              |             |         |                                                                              |                        |               |          |        |     |                |           |    |      |     |     |    |  |  |  |  |
|------------------------------------------------------------------------------|-------------|---------|------------------------------------------------------------------------------|------------------------|---------------|----------|--------|-----|----------------|-----------|----|------|-----|-----|----|--|--|--|--|
| 320                                                                          | IPI00217493 | MB      | MYOGLOBIN.                                                                   | KASGPPVSELITK          | R             | A        | 95.00% | 46  |                | 442.9287  | 3  | 5.2  | 35  | 47  | No |  |  |  |  |
|                                                                              |             |         |                                                                              | SGVSLAALKK             | R             | A        | 95.00% | 30  |                | 487.3087  | 2  | 5.1  | 56  | 65  | No |  |  |  |  |
|                                                                              |             |         |                                                                              | VAGAATPKK              | K             | S        | 95.00% | 28  |                | 421.7606  | 2  | 3.9  | 142 | 150 | No |  |  |  |  |
|                                                                              |             |         |                                                                              | ALELFR                 | K             | K        | 95.00% | 28  |                | 748.4393  | 1  | 4.6  | 135 | 140 | No |  |  |  |  |
|                                                                              |             |         |                                                                              | ALELFRK                | K             | D        | 95.00% | 46  |                | 438.7711  | 2  | 4.1  | 135 | 141 | No |  |  |  |  |
|                                                                              |             |         |                                                                              | ASEDLKKGATVLTALGGILK   | K             | K        | 95.00% | 26  |                | 708.0847  | 3  | 6.9  | 58  | 78  | No |  |  |  |  |
|                                                                              |             |         |                                                                              | DMASNYK                | K             | E        | 95.00% | 33  | M2: Oxidation  | 422.6809  | 2  | 3.4  | 142 | 148 | No |  |  |  |  |
|                                                                              |             |         |                                                                              | DMASNYKELGFQG          | K             | -        | 95.00% | 66  | M2: Oxidation  | 738.3343  | 2  | 8.9  | 142 | 154 | No |  |  |  |  |
|                                                                              |             |         |                                                                              | GHHEAEIKPLAQSHATK      | K             | H        | 95.00% | 96  |                | 927.4943  | 2  | 9.9  | 81  | 97  | No |  |  |  |  |
|                                                                              |             |         |                                                                              | GHHEAEIKPLAQSHATK      | K             | H        | 95.00% | 49  |                | 618.6634  | 3  | 6.7  | 81  | 97  | No |  |  |  |  |
|                                                                              |             |         |                                                                              | GHHEAEIKPLAQSHATK      | K             | H        | 95.00% | 43  |                | 464.2490  | 4  | 5.4  | 81  | 97  | No |  |  |  |  |
|                                                                              |             |         |                                                                              | GHPETLEK               | K             | F        | 95.00% | 44  |                | 455.7370  | 2  | 3.0  | 36  | 43  | No |  |  |  |  |
|                                                                              |             |         |                                                                              | GHPETLEKFDK            | K             | F        | 95.00% | 56  |                | 650.8351  | 2  | 6.5  | 36  | 46  | No |  |  |  |  |
|                                                                              |             |         |                                                                              | GHPETLEKFDK            | K             | F        | 95.00% | 44  |                | 434.2246  | 3  | 3.4  | 36  | 46  | No |  |  |  |  |
|                                                                              |             |         |                                                                              | GHPETLEKFDKFK          | K             | H        | 95.00% | 38  |                | 788.4202  | 2  | 9.7  | 36  | 48  | No |  |  |  |  |
|                                                                              |             |         |                                                                              | GLSDGEWQLVLNVWGK       | M             | V        | 95.00% | 113 |                | 900.9757  | 2  | 8.3  | 2   | 17  | No |  |  |  |  |
|                                                                              |             |         |                                                                              | GLSDGEWQLVLNVWGK       | M             | V        | 95.00% | 64  |                | 600.9848  | 3  | 5.6  | 2   | 17  | No |  |  |  |  |
|                                                                              |             |         |                                                                              | GLSDGEWQLVLNVWGKVEADIP |               |          |        |     |                |           |    |      |     |     |    |  |  |  |  |
|                                                                              |             |         |                                                                              | GHGQEVLR               | M             | L        | 95.00% | 95  |                | 1138.9400 | 3  | 6.9  | 2   | 32  | No |  |  |  |  |
|                                                                              |             |         |                                                                              | GLSDGEWQLVLNVWGKVEADIP |               |          |        |     |                |           |    |      |     |     |    |  |  |  |  |
|                                                                              |             |         |                                                                              | GHGQEVLR               | M             | L        | 95.00% | 44  |                | 854.4594  | 4  | 9.9  | 2   | 32  | No |  |  |  |  |
|                                                                              |             |         |                                                                              | HGATVLTALGGILK         | K             | K        | 95.00% | 45  | T4: Phospho    | 715.8991  | 2  | 9.0  | 65  | 78  | No |  |  |  |  |
|                                                                              |             |         |                                                                              | HGATVLTALGGILK         | K             | K        | 95.00% | 61  | T7: Phospho    | 715.8988  | 2  | 8.6  | 65  | 78  | No |  |  |  |  |
|                                                                              |             |         |                                                                              | HGATVLTALGGILK         | K             | K        | 95.00% | 39  | T7: Phospho    | 477.6003  | 3  | 5.5  | 65  | 78  | No |  |  |  |  |
|                                                                              |             |         |                                                                              | HGATVLTALGGILK         | K             | K        | 95.00% | 90  |                | 1350.8240 | 1  | 9.6  | 65  | 78  | No |  |  |  |  |
|                                                                              |             |         |                                                                              | HGATVLTALGGILK         | K             | K        | 95.00% | 119 |                | 675.9068  | 2  | -4.0 | 65  | 78  | No |  |  |  |  |
|                                                                              |             |         |                                                                              | HGATVLTALGGILK         | K             | K        | 95.00% | 83  |                | 450.9459  | 3  | 8.1  | 65  | 78  | No |  |  |  |  |
|                                                                              |             |         |                                                                              | HGATVLTALGGILKK        | K             | K        | 95.00% | 99  |                | 739.9622  | 2  | 7.0  | 65  | 79  | No |  |  |  |  |
|                                                                              |             |         |                                                                              | HGATVLTALGGILKK        | K             | K        | 95.00% | 91  |                | 493.6431  | 3  | 5.0  | 65  | 79  | No |  |  |  |  |
|                                                                              |             |         |                                                                              | HGATVLTALGGILKKK       | K             | G        | 95.00% | 42  |                | 536.3418  | 3  | 5.4  | 65  | 80  | No |  |  |  |  |
|                                                                              |             |         |                                                                              | HKIPVKYLEFISECIIQLQSK  | K             | H        | 95.00% | 46  |                | 872.5009  | 3  | 9.0  | 98  | 119 | No |  |  |  |  |
|                                                                              |             |         |                                                                              | HLKSEDEMK              | K             | A        | 95.00% | 42  | M8: Oxidation  | 566.7716  | 2  | 3.9  | 49  | 57  | No |  |  |  |  |
|                                                                              |             |         |                                                                              | HLKSEDEMK              | K             | A        | 95.00% | 40  |                | 558.7758  | 2  | 6.9  | 49  | 57  | No |  |  |  |  |
|                                                                              |             |         |                                                                              | HLKSEDEMKASEDLK        | K             | K        | 95.00% | 33  | M8: Oxidation  | 592.6256  | 3  | 7.0  | 49  | 63  | No |  |  |  |  |
|                                                                              |             |         |                                                                              | HPGDFGADAQGAMNK        | K             | A        | 95.00% | 105 | M13: Oxidation | 768.3365  | 2  | 3.3  | 120 | 134 | No |  |  |  |  |
|                                                                              |             |         |                                                                              | HPGDFGADAQGAMNK        | K             | A        | 95.00% | 85  | M13: Oxidation | 511.2267  | 3  | 2.9  | 120 | 134 | No |  |  |  |  |
|                                                                              |             |         |                                                                              | HPGDFGADAQGAMNK        | K             | A        | 95.00% | 107 |                | 758.3402  | 2  | 4.8  | 120 | 134 | No |  |  |  |  |
|                                                                              |             |         |                                                                              | HPGDFGADAQGAMNK        | K             | A        | 95.00% | 64  |                | 505.8960  | 3  | 4.8  | 120 | 134 | No |  |  |  |  |
|                                                                              |             |         |                                                                              | HPGDFGADAQGAMNKALELFR  | K             | K        | 95.00% | 47  | M13: Oxidation | 566.0292  | 4  | 7.1  | 120 | 140 | No |  |  |  |  |
|                                                                              |             |         |                                                                              | KDMASNYK               | R             | E        | 95.00% | 45  | M3: Oxidation  | 486.7313  | 2  | 8.8  | 141 | 148 | No |  |  |  |  |
|                                                                              |             |         |                                                                              | KDMASNYKELGFQG         | R             | -        | 95.00% | 70  | M3: Oxidation  | 802.3829  | 2  | 9.5  | 141 | 154 | No |  |  |  |  |
|                                                                              |             |         |                                                                              | KGHHEAEIKPLAQSHATK     | K             | H        | 95.00% | 89  |                | 991.5405  | 2  | 7.9  | 80  | 97  | No |  |  |  |  |
|                                                                              |             |         |                                                                              | KGHHEAEIKPLAQSHATK     | K             | H        | 95.00% | 56  |                | 661.3615  | 3  | 5.7  | 80  | 97  | No |  |  |  |  |
|                                                                              |             |         |                                                                              | KGHHEAEIKPLAQSHATK     | K             | H        | 95.00% | 50  |                | 496.2735  | 4  | 6.5  | 80  | 97  | No |  |  |  |  |
|                                                                              |             |         |                                                                              | KHGATVLTALGGILK        | K             | K        | 95.00% | 90  |                | 739.9603  | 2  | 4.5  | 64  | 78  | No |  |  |  |  |
| KHGATVLTALGGILK                                                              | K           | K       | 95.00%                                                                       | 58                     |               | 493.6449 | 3      | 8.7 | 64             | 78        | No |      |     |     |    |  |  |  |  |
| KHGATVLTALGGILK                                                              | K           | K       | 95.00%                                                                       | 44                     |               | 536.3434 | 3      | 8.4 | 64             | 79        | No |      |     |     |    |  |  |  |  |
| KHGATVLTALGGILKK                                                             | K           | K       | 95.00%                                                                       | 40                     |               | 402.5086 | 4      | 6.1 | 64             | 79        | No |      |     |     |    |  |  |  |  |
| PLAQSHATK                                                                    | K           | H       | 95.00%                                                                       | 35                     |               | 952.5292 | 1      | 7.9 | 89             | 97        | No |      |     |     |    |  |  |  |  |
| PLAQSHATK                                                                    | K           | H       | 95.00%                                                                       | 70                     |               | 476.7667 | 2      | 4.0 | 89             | 97        | No |      |     |     |    |  |  |  |  |
| SEDEMKASEDLK                                                                 | K           | H       | 95.00%                                                                       | 37                     | M5: Oxidation | 763.3633 | 2      | 8.6 | 52             | 64        | No |      |     |     |    |  |  |  |  |
| SEDEMKASEDLK                                                                 | K           | H       | 95.00%                                                                       | 32                     | M5: Oxidation | 509.2440 | 3      | 7.0 | 52             | 64        | No |      |     |     |    |  |  |  |  |
| VEADIPGHGQEVLR                                                               | K           | L       | 95.00%                                                                       | 99                     |               | 816.9457 | 2      | 7.6 | 18             | 32        | No |      |     |     |    |  |  |  |  |
| VEADIPGHGQEVLR                                                               | K           | L       | 95.00%                                                                       | 75                     |               | 544.9625 | 3      | 0.3 | 18             | 32        | No |      |     |     |    |  |  |  |  |
| YLEFISECIIQLQSK                                                              | K           | H       | 95.00%                                                                       | 39                     |               | 638.3475 | 3      | 9.0 | 104            | 119       | No |      |     |     |    |  |  |  |  |
| DELTA-1-PYRROLINE-5-CARBOXYLATE<br>DEHYDROGENASE,<br>MITOCHONDRIALPRECURSOR. |             |         |                                                                              |                        |               |          |        |     |                |           |    |      |     |     |    |  |  |  |  |
| 321                                                                          | IPI00217871 | ALDH4A1 | DELTA-1-PYRROLINE-5-CARBOXYLATE<br>DEHYDROGENASE,<br>MITOCHONDRIALPRECURSOR. | AIEAALAAR              | K             | K        | 95.00% | 44  |                | 443.2638  | 2  | 4.6  | 105 | 113 | No |  |  |  |  |
|                                                                              |             |         |                                                                              | ASGTNDKPGGPHYLR        | R             | W        | 95.00% | 61  |                | 841.9376  | 2  | 3.4  | 525 | 540 | No |  |  |  |  |
|                                                                              |             |         |                                                                              | ASGTNDKPGGPHYLR        | R             | W        | 95.00% | 49  |                | 561.6277  | 3  | 3.4  | 525 | 540 | No |  |  |  |  |
|                                                                              |             |         |                                                                              | ETHKPLGDWSYAYMK        | K             | -        | 95.00% | 52  | M14: Oxidation | 921.4205  | 2  | 8.7  | 549 | 563 | No |  |  |  |  |
|                                                                              |             |         |                                                                              | IKVGDPAEDFGTFFSAVIDAK  | R             | S        | 95.00% | 61  |                | 743.0527  | 3  | 6.2  | 375 | 395 | No |  |  |  |  |
|                                                                              |             |         |                                                                              | LYVPHSLWPQIK           | R             | G        | 95.00% | 42  |                | 494.2841  | 3  | 3.4  | 354 | 365 | No |  |  |  |  |
|                                                                              |             |         |                                                                              | NAAGNFYINDK            | R             | S        | 95.00% | 59  |                | 613.7954  | 2  | 1.9  | 499 | 509 | No |  |  |  |  |
|                                                                              |             |         |                                                                              | SADVESVVSGLR           | R             | S        | 95.00% | 90  |                | 660.3485  | 2  | 6.5  | 326 | 338 | No |  |  |  |  |
|                                                                              |             |         |                                                                              | SSPSLTILAGGK           | R             | C        | 95.00% | 43  |                | 565.8287  | 2  | 6.5  | 409 | 420 | No |  |  |  |  |
|                                                                              |             |         |                                                                              | STGSIVQQPFGGAR         | K             | A        | 95.00% | 64  |                | 731.3801  | 2  | 5.0  | 510 | 524 | No |  |  |  |  |
|                                                                              |             |         |                                                                              | VANEPVLAFTQGSER        | K             | D        | 95.00% | 110 |                | 857.9484  | 2  | 7.3  | 32  | 47  | No |  |  |  |  |
|                                                                              |             |         |                                                                              | VGDPADDFGTFFSAVIDAK    | K             | S        | 95.00% | 117 |                | 993.4880  | 2  | 9.3  | 377 | 395 | No |  |  |  |  |

|     |                          |      |                                                                                             |                         |   |   |        |                       |                              |           |        |      |                              |           |    |     |     |     |    |
|-----|--------------------------|------|---------------------------------------------------------------------------------------------|-------------------------|---|---|--------|-----------------------|------------------------------|-----------|--------|------|------------------------------|-----------|----|-----|-----|-----|----|
| 322 | IPI00217966              | LDHA | ISOFORM 1 OF L-LACTATE DEHYDROGENASE A CHAIN.                                               | VGDP AEDFGTFFSAVIDAK    | K | S | 95.00% | 75                    |                              | 662.6597  | 3      | 7.0  | 377                          | 395       | No |     |     |     |    |
|     |                          |      |                                                                                             | YKETLQLVDSTTSYGLTGAVFSQ |   |   |        |                       |                              |           |        |      |                              |           |    |     |     |     |    |
|     |                          |      |                                                                                             | DKD VVQEATK             | K | V | 95.00% | 57                    |                              | 906.2189  | 4      | 9.5  | 463                          | 495       | No |     |     |     |    |
|     |                          |      |                                                                                             |                         |   |   |        | DLADELALVDVIEDK       | K                            | L         | 95.00% | 121  |                              | 829.4388  | 2  | 9.5 | 43  | 57  | No |
|     |                          |      |                                                                                             |                         |   |   |        | DLADELALVDVIEDK       | K                            | L         | 95.00% | 88   |                              | 553.2913  | 3  | 2.6 | 43  | 57  | No |
|     |                          |      |                                                                                             |                         |   |   |        | DLADELALVDVIEDK LK    | K                            | G         | 95.00% | 33   |                              | 950.0275  | 2  | 7.4 | 43  | 59  | No |
|     |                          |      |                                                                                             |                         |   |   |        | DLADELALVDVIEDK LK    | K                            | G         | 95.00% | 32   |                              | 633.6872  | 3  | 6.7 | 43  | 59  | No |
|     |                          |      |                                                                                             |                         |   |   |        | DQLIYNLLK             | K                            | E         | 95.00% | 44   |                              | 1119.6520 | 1  | 9.3 | 6   | 14  | No |
|     |                          |      |                                                                                             |                         |   |   |        | DQLIYNLLK             | K                            | E         | 95.00% | 69   |                              | 560.3275  | 2  | 4.9 | 6   | 14  | No |
|     |                          |      |                                                                                             |                         |   |   |        | DQLIYNLLKEEQTPQNK     | K                            | I         | 95.00% | 105  |                              | 1037.5540 | 2  | 8.6 | 6   | 22  | No |
|     |                          |      |                                                                                             |                         |   |   |        | DQLIYNLLKEEQTPQNK     | K                            | I         | 95.00% | 61   |                              | 692.0383  | 3  | 8.1 | 6   | 22  | No |
|     |                          |      |                                                                                             |                         |   |   |        | EVHKQVVESAYEVIK       | K                            | L         | 95.00% | 73   |                              | 879.4830  | 2  | 8.3 | 229 | 243 | No |
|     |                          |      |                                                                                             |                         |   |   |        | EVHKQVVESAYEVIK       | K                            | L         | 95.00% | 47   |                              | 586.6559  | 3  | 4.9 | 229 | 243 | No |
|     |                          |      |                                                                                             |                         |   |   |        | FIIPNVVK              | K                            | Y         | 95.00% | 38   |                              | 465.2981  | 2  | 6.4 | 119 | 126 | No |
|     |                          |      |                                                                                             |                         |   |   |        | GEMMDLQHGSFLR         | K                            | T         | 95.00% | 46   | M3: Oxidation                | 825.3982  | 2  | 6.4 | 60  | 73  | No |
|     |                          |      |                                                                                             |                         |   |   |        | GEMMDLQHGSFLR         | K                            | T         | 95.00% | 37   | M3: Oxidation                | 550.6003  | 3  | 4.4 | 60  | 73  | No |
|     |                          |      |                                                                                             |                         |   |   |        | GEMMDLQHGSFLR         | K                            | T         | 95.00% | 49   | M3: Oxidation                | 833.3943  | 2  | 4.6 | 60  | 73  | No |
|     |                          |      |                                                                                             |                         |   |   |        | GEMMDLQHGSFLR         | K                            | T         | 95.00% | 49   | M3: Oxidation, M4: Oxidation | 833.3943  | 2  | 4.6 | 60  | 73  | No |
|     |                          |      |                                                                                             |                         |   |   |        | GEMMDLQHGSFLR         | K                            | T         | 95.00% | 43   | M3: Oxidation, M4: Oxidation | 555.9330  | 3  | 6.2 | 60  | 73  | No |
|     |                          |      |                                                                                             |                         |   |   |        | GEMMDLQHGSFLR         | K                            | T         | 95.00% | 38   | M4: Oxidation                | 825.3981  | 2  | 6.2 | 60  | 73  | No |
|     |                          |      |                                                                                             |                         |   |   |        | GEMMDLQHGSFLR         | K                            | T         | 95.00% | 76   |                              | 817.4020  | 2  | 7.8 | 60  | 73  | No |
|     |                          |      |                                                                                             |                         |   |   |        | GYT SWAIGLSVADLAESIMK | K                            | N         | 95.00% | 39   | M19: Oxidation               | 1064.5450 | 2  | 8.5 | 246 | 265 | No |
|     |                          |      |                                                                                             |                         |   |   |        | GYT SWAIGLSVADLAESIMK | K                            | N         | 95.00% | 36   |                              | 704.7001  | 3  | 7.5 | 246 | 265 | No |
|     |                          |      |                                                                                             |                         |   |   |        | ISGFPK                | K                            | N         | 95.00% | 29   |                              | 648.3749  | 1  | 4.3 | 150 | 155 | No |
|     |                          |      |                                                                                             |                         |   |   |        | IVSGKDYNVTANSK        | K                            | L         | 95.00% | 97   |                              | 748.3975  | 2  | 7.8 | 77  | 90  | No |
|     |                          |      |                                                                                             |                         |   |   |        | IVSGKDYNVTANSK        | K                            | L         | 95.00% | 42   |                              | 499.2664  | 3  | 5.2 | 77  | 90  | No |
|     |                          |      |                                                                                             |                         |   |   |        | KSADTLWGIQK           | K                            | E         | 95.00% | 53   |                              | 623.8487  | 2  | 7.8 | 318 | 328 | No |
|     |                          |      |                                                                                             |                         |   |   |        | KSADTLWGIQK           | K                            | E         | 95.00% | 55   |                              | 416.2342  | 3  | 5.8 | 318 | 328 | No |
|     |                          |      |                                                                                             |                         |   |   |        | LKGEMMDLQHGSFLR       | K                            | T         | 95.00% | 33   | M5: Oxidation                | 630.9947  | 3  | 5.9 | 58  | 73  | No |
|     |                          |      |                                                                                             |                         |   |   |        | LKGEMMDLQHGSFLR       | K                            | T         | 95.00% | 49   | M5: Oxidation                | 953.9860  | 2  | 6.3 | 58  | 73  | No |
|     |                          |      |                                                                                             |                         |   |   |        | LKGEMMDLQHGSFLR       | K                            | T         | 95.00% | 55   | M5: Oxidation, M6: Oxidation | 953.9862  | 2  | 6.6 | 58  | 73  | No |
|     |                          |      |                                                                                             |                         |   |   |        | LKGEMMDLQHGSFLR       | K                            | T         | 95.00% | 39   | M5: Oxidation, M6: Oxidation | 636.3266  | 3  | 6.3 | 58  | 73  | No |
|     |                          |      |                                                                                             | LKGEMMDLQHGSFLR         | K | T | 95.00% | 42                    | M5: Oxidation, M6: Oxidation | 477.4979  | 4      | 8.4  | 58                           | 73        | No |     |     |     |    |
|     |                          |      |                                                                                             | LKGEMMDLQHGSFLR         | K | T | 95.00% | 37                    | M6: Oxidation                | 630.9948  | 3      | 6.2  | 58                           | 73        | No |     |     |     |    |
|     |                          |      |                                                                                             | LKGEMMDLQHGSFLR         | K | T | 95.00% | 101                   |                              | 937.9928  | 2      | 8.3  | 58                           | 73        | No |     |     |     |    |
|     |                          |      |                                                                                             | LKGEMMDLQHGSFLR         | K | T | 95.00% | 34                    |                              | 469.4982  | 4      | 3.7  | 58                           | 73        | No |     |     |     |    |
|     |                          |      |                                                                                             | LLIVSNPVDILTYVAVK       | K | I | 95.00% | 151                   |                              | 972.5720  | 2      | 7.7  | 133                          | 149       | No |     |     |     |    |
|     |                          |      |                                                                                             | LLIVSNPVDILTYVAVK       | K | I | 95.00% | 86                    |                              | 648.7171  | 3      | 7.5  | 133                          | 149       | No |     |     |     |    |
|     |                          |      |                                                                                             | LVITAGAR                | K | Q | 95.00% | 76                    |                              | 457.2954  | 2      | -0.6 | 91                           | 99        | No |     |     |     |    |
|     |                          |      |                                                                                             | NVNIFK                  | R | F | 95.00% | 36                    |                              | 734.4272  | 1      | 9.7  | 113                          | 118       | No |     |     |     |    |
|     |                          |      |                                                                                             | QVVESAYEVIK             | K | L | 95.00% | 88                    |                              | 632.8455  | 2      | 3.5  | 233                          | 243       | No |     |     |     |    |
|     |                          |      |                                                                                             | QVVESAYEVIK LK          | K | G | 95.00% | 28                    |                              | 502.6284  | 3      | 7.8  | 233                          | 245       | No |     |     |     |    |
|     |                          |      |                                                                                             | RVHPVSTMIK              | R | G | 95.00% | 42                    | M8: Oxidation                | 592.3368  | 2      | 3.1  | 269                          | 278       | No |     |     |     |    |
|     |                          |      |                                                                                             | SADTLWGIQK              | K | E | 95.00% | 40                    |                              | 1118.5950 | 1      | 9.1  | 319                          | 328       | No |     |     |     |    |
|     |                          |      |                                                                                             | SADTLWGIQK              | K | E | 95.00% | 62                    |                              | 559.7975  | 2      | 2.1  | 319                          | 328       | No |     |     |     |    |
|     |                          |      |                                                                                             | TLHPDLGTDKDKQWK         | K | E | 95.00% | 49                    |                              | 955.9893  | 2      | 4.8  | 213                          | 228       | No |     |     |     |    |
|     |                          |      |                                                                                             | VTLTSEEAR               | K | L | 95.00% | 44                    |                              | 1134.5740 | 1      | 8.5  | 306                          | 315       | No |     |     |     |    |
|     |                          |      |                                                                                             | VTLTSEEAR               | K | L | 95.00% | 71                    |                              | 567.7856  | 2      | -0.9 | 306                          | 315       | No |     |     |     |    |
|     |                          |      |                                                                                             | VTLTSEEARLK             | K | K | 95.00% | 35                    |                              | 688.3806  | 2      | 7.3  | 306                          | 317       | No |     |     |     |    |
| 323 | IPI00217976; IPI00747283 | MAPT | MICROTUBULE-ASSOCIATED PROTEIN TAU.; ISOFORM PNS-TAU OF MICROTUBULE-ASSOCIATED PROTEIN TAU. | EEVDEDRDVESSPQDSPPSK    | K | A | 95.00% | 45                    |                              | 787.3432  | 3      | 5.3  | 216                          | 236       | No |     |     |     |    |
|     |                          |      |                                                                                             | GPSLGEDTKEADLPPESEK     | R | Q | 95.00% | 43                    |                              | 666.9924  | 3      | 5.1  | 339                          | 357       | No |     |     |     |    |
|     |                          |      |                                                                                             | HQLLGDHLHQEGPPLK        | K | G | 95.00% | 38                    |                              | 561.3080  | 3      | 3.2  | 190                          | 204       | No |     |     |     |    |
|     |                          |      |                                                                                             | IGSLDNITHVPGGGNK        | K | K | 95.00% | 33                    |                              | 789.9219  | 2      | 7.5  | 671                          | 686       | No |     |     |     |    |
|     |                          |      |                                                                                             | LQTAPVMPDLK             | R | N | 95.00% | 39                    |                              | 663.3650  | 2      | 6.0  | 560                          | 571       | No |     |     |     |    |
|     |                          |      |                                                                                             | VSTEIPASEPDGPSVGR       | K | A | 95.00% | 50                    |                              | 849.4238  | 2      | 2.9  | 275                          | 291       | No |     |     |     |    |
| 324 | IPI00218130              | PYGM | GLYCOGEN PHOSPHORYLASE, MUSCLE FORM.                                                        | APNDFNLK                | K | D | 95.00% | 43                    |                              | 918.4750  | 1      | 7.0  | 249                          | 256       | No |     |     |     |    |
|     |                          |      |                                                                                             | APNDFNLK                | K | D | 95.00% | 51                    |                              | 459.7390  | 2      | 1.9  | 249                          | 256       | No |     |     |     |    |
|     |                          |      |                                                                                             | APNDFNLKDFNVGGYIQAVLDR  | K | N | 95.00% | 137                   |                              | 1233.6360 | 2      | 9.2  | 249                          | 270       | No |     |     |     |    |
|     |                          |      |                                                                                             | APNDFNLKDFNVGGYIQAVLDR  | K | N | 95.00% | 77                    |                              | 822.7585  | 3      | 7.4  | 249                          | 270       | No |     |     |     |    |

|                        |   |   |        |     |  |           |   |     |     |     |    |  |  |  |
|------------------------|---|---|--------|-----|--|-----------|---|-----|-----|-----|----|--|--|--|
| ARPEFTLPVHFYGHVEHTSQGA |   |   |        |     |  |           |   |     |     |     |    |  |  |  |
| K                      | K | W | 95.00% | 78  |  | 870.1143  | 3 | 8.2 | 193 | 215 | No |  |  |  |
| ARPEFTLPVHFYGHVEHTSQGA |   |   |        |     |  |           |   |     |     |     |    |  |  |  |
| K                      | K | W | 95.00% | 54  |  | 652.8364  | 4 | 6.2 | 193 | 215 | No |  |  |  |
| AWDVTVR                | K | T | 95.00% | 34  |  | 846.4500  | 1 | 3.0 | 365 | 371 | No |  |  |  |
| AWDVTVR                | K | T | 95.00% | 50  |  | 423.7283  | 2 | 1.7 | 365 | 371 | No |  |  |  |
| DFNVGGYIQAVLDR         | K | N | 95.00% | 120 |  | 783.9009  | 2 | 1.5 | 257 | 270 | No |  |  |  |
| DFNVGGYIQAVLDR         | K | N | 95.00% | 78  |  | 522.9370  | 3 | 2.3 | 257 | 270 | No |  |  |  |
| DFYELEPHK              | K | F | 95.00% | 44  |  | 589.2827  | 2 | 3.8 | 471 | 479 | No |  |  |  |
| DFYELEPHKFQNK          | K | T | 95.00% | 52  |  | 847.9187  | 2 | 6.9 | 471 | 483 | No |  |  |  |
| DIVNMLMHDR             | K | F | 95.00% | 42  |  | 698.8291  | 2 | 2.6 | 761 | 771 | No |  |  |  |
| DIVNMLMHDR             | K | F | 95.00% | 35  |  | 706.8248  | 2 | 0.1 | 761 | 771 | No |  |  |  |
|                        |   |   |        |     |  |           |   |     |     |     |    |  |  |  |
| DIVNMLMHDR             | K | F | 95.00% | 46  |  | 706.8292  | 2 | 6.3 | 761 | 771 | No |  |  |  |
|                        |   |   |        |     |  |           |   |     |     |     |    |  |  |  |
| DIVNMLMHDR             | K | F | 95.00% | 33  |  | 471.5535  | 3 | 2.2 | 761 | 771 | No |  |  |  |
| DIVNMLMHDR             | K | F | 95.00% | 45  |  | 698.8303  | 2 | 4.4 | 761 | 771 | No |  |  |  |
| DYYFALAHTVR            | R | D | 95.00% | 79  |  | 678.3436  | 2 | 3.4 | 51  | 61  | No |  |  |  |
| DYYFALAHTVR            | R | D | 95.00% | 55  |  | 452.5653  | 3 | 4.0 | 51  | 61  | No |  |  |  |
| DYYFALAHTVRDHLVGR      | R | W | 95.00% | 41  |  | 678.3528  | 3 | 3.5 | 51  | 67  | No |  |  |  |
| EIWGVEPSR              | R | Q | 95.00% | 45  |  | 1072.5500 | 1 | 6.4 | 824 | 832 | No |  |  |  |
| EIWGVEPSR              | R | Q | 95.00% | 46  |  | 536.7763  | 2 | 1.8 | 824 | 832 | No |  |  |  |
| EYKVHINPNSLFDIQVK      | R | R | 95.00% | 36  |  | 682.0408  | 3 | 9.9 | 553 | 569 | No |  |  |  |
| EYKVHINPNSLFDIQVK      | R | R | 95.00% | 27  |  | 511.7815  | 4 | 7.6 | 553 | 569 | No |  |  |  |
| FAAYLER                | K | E | 95.00% | 36  |  | 869.4558  | 1 | 4.2 | 546 | 552 | No |  |  |  |
| FAAYLER                | K | E | 95.00% | 47  |  | 435.2311  | 2 | 2.7 | 546 | 552 | No |  |  |  |
| FKVFADYEDYIK           | R | C | 95.00% | 74  |  | 769.3890  | 2 | 7.9 | 772 | 783 | No |  |  |  |
| FKVFADYEDYIK           | R | C | 95.00% | 58  |  | 513.2613  | 3 | 6.7 | 772 | 783 | No |  |  |  |
| GLAGVENVTELK           | R | K | 95.00% | 47  |  | 1229.6860 | 1 | 9.7 | 18  | 29  | No |  |  |  |
| GLAGVENVTELK           | R | K | 95.00% | 84  |  | 615.3432  | 2 | 3.5 | 18  | 29  | No |  |  |  |
| GLAGVENVTELK           | R | N | 95.00% | 105 |  | 679.3906  | 2 | 3.1 | 18  | 30  | No |  |  |  |
| GLAGVENVTELK           | R | N | 95.00% | 55  |  | 453.2617  | 3 | 0.2 | 18  | 30  | No |  |  |  |
| GYNQAQEYDR             | R | I | 95.00% | 71  |  | 639.7755  | 2 | 3.2 | 726 | 735 | No |  |  |  |
| GYNQAQEYDRPELNR        | R | Q | 95.00% | 59  |  | 943.9611  | 2 | 5.6 | 726 | 740 | No |  |  |  |
| GYNQAQEYDRPELNR        | R | Q | 95.00% | 66  |  | 629.6426  | 3 | 4.5 | 726 | 740 | No |  |  |  |
| HLHFTLVK               | R | D | 95.00% | 31  |  | 994.5856  | 1 | 1.7 | 35  | 42  | No |  |  |  |
| HLHFTLVK               | R | D | 95.00% | 44  |  | 497.7996  | 2 | 7.4 | 35  | 42  | No |  |  |  |
| HLHFTLVKDR             | R | N | 95.00% | 50  |  | 633.3628  | 2 | 4.6 | 35  | 44  | No |  |  |  |
| HLHFTLVKDR             | R | N | 95.00% | 31  |  | 422.5769  | 3 | 2.3 | 35  | 44  | No |  |  |  |
| HLQIIEINQR             | R | F | 95.00% | 80  |  | 713.8990  | 2 | 6.6 | 400 | 410 | No |  |  |  |
| HLQIIEINQR             | R | F | 95.00% | 64  |  | 476.2672  | 3 | 3.6 | 400 | 410 | No |  |  |  |
| IGEDFISDLQDLR          | R | K | 95.00% | 82  |  | 760.8860  | 2 | 2.8 | 508 | 520 | No |  |  |  |
| IGEDFISDLQDLR          | R | K | 95.00% | 63  |  | 507.5938  | 3 | 3.9 | 508 | 520 | No |  |  |  |
| IGEDFISDLQDLRK         | R | L | 95.00% | 107 |  | 824.9355  | 2 | 5.0 | 508 | 521 | No |  |  |  |
| IGEDFISDLQDLRK         | R | L | 95.00% | 75  |  | 550.2919  | 3 | 3.0 | 508 | 521 | No |  |  |  |
| IHSEILKK               | R | T | 95.00% | 28  |  | 484.3041  | 2 | 6.4 | 459 | 466 | No |  |  |  |
| ILVDLER                | R | M | 95.00% | 36  |  | 857.5116  | 1 | 2.1 | 353 | 359 | No |  |  |  |
| ILVDLER                | R | M | 95.00% | 61  |  | 429.2592  | 2 | 0.9 | 353 | 359 | No |  |  |  |
| ILVDLERMDWDK           | R | A | 95.00% | 40  |  | 774.8965  | 2 | 7.6 | 353 | 364 | No |  |  |  |
| ILVDLERMDWDKAWDVTVR    | R | T | 95.00% | 42  |  | 792.7458  | 3 | 8.2 | 353 | 371 | No |  |  |  |
| ISGGWQMEEAADDWLR       | K | Y | 95.00% | 95  |  | 904.9054  | 2 | 6.3 | 171 | 185 | No |  |  |  |
| ISGGWQMEEAADDWLR       | K | Y | 95.00% | 55  |  | 603.6046  | 3 | 3.7 | 171 | 185 | No |  |  |  |
| ISGGWQMEEAADDWLR       | K | Y | 95.00% | 107 |  | 896.9098  | 2 | 8.5 | 171 | 185 | No |  |  |  |
| ISGGWQMEEAADDWLR       | K | Y | 95.00% | 48  |  | 598.2715  | 3 | 1.2 | 171 | 185 | No |  |  |  |
| IYLSLEFYMGR            | R | T | 95.00% | 97  |  | 785.8895  | 2 | 6.1 | 83  | 94  | No |  |  |  |
| KLLSFVDDEAFIR          | R | D | 95.00% | 113 |  | 776.9249  | 2 | 2.8 | 521 | 533 | No |  |  |  |
| KLLSFVDDEAFIR          | R | D | 95.00% | 73  |  | 518.2863  | 3 | 3.6 | 521 | 533 | No |  |  |  |
| KLLSFVDDEAFIRDVAK      | R | V | 95.00% | 93  |  | 983.5431  | 2 | 6.8 | 521 | 537 | No |  |  |  |
| KLLSFVDDEAFIRDVAK      | R | V | 95.00% | 69  |  | 656.0327  | 3 | 8.8 | 521 | 537 | No |  |  |  |
| KLLSFVDDEAFIRDVAK      | R | V | 95.00% | 52  |  | 492.2749  | 4 | 5.6 | 521 | 537 | No |  |  |  |
| LKFAAYLER              | K | E | 95.00% | 55  |  | 555.8227  | 2 | 5.7 | 544 | 552 | No |  |  |  |
| LKQEFVVAATLQDIIR       | R | R | 95.00% | 139 |  | 1004.0780 | 2 | 9.8 | 294 | 310 | No |  |  |  |
| LKQEFVVAATLQDIIR       | R | R | 95.00% | 70  |  | 669.7180  | 3 | 5.0 | 294 | 310 | No |  |  |  |
| LKQEFVVAATLQDIIR       | R | R | 95.00% | 50  |  | 502.5422  | 4 | 8.5 | 294 | 310 | No |  |  |  |
| LLSFVDDEAFIR           | K | D | 95.00% | 94  |  | 712.8773  | 2 | 2.8 | 522 | 533 | No |  |  |  |
| LLSFVDDEAFIR           | K | D | 95.00% | 66  |  | 475.5876  | 3 | 3.3 | 522 | 533 | No |  |  |  |
| LLSFVDDEAFIRDVAK       | K | V | 95.00% | 96  |  | 919.4941  | 2 | 5.6 | 522 | 537 | No |  |  |  |
| LLSFVDDEAFIRDVAK       | K | V | 95.00% | 62  |  | 613.3301  | 3 | 2.6 | 522 | 537 | No |  |  |  |
| LPAPDEAI               | R | - | 95.00% | 33  |  | 825.4388  | 1 | 3.5 | 835 | 842 | No |  |  |  |
| LPAPDEAI               | R | - | 95.00% | 31  |  | 413.2227  | 2 | 2.0 | 835 | 842 | No |  |  |  |

|                          |   |   |        |     |                |           |   |      |     |     |    |
|--------------------------|---|---|--------|-----|----------------|-----------|---|------|-----|-----|----|
| LRVIFLENYR               | R | V | 95.00% | 26  |                | 441.5942  | 3 | 6.4  | 641 | 650 | No |
| LVTAGDVVNHDPVAVGDR       | R | L | 95.00% | 132 |                | 924.4875  | 2 | 2.9  | 623 | 640 | No |
| LVTAGDVVNHDPVAVGDR       | R | L | 95.00% | 70  |                | 616.6608  | 3 | 2.8  | 623 | 640 | No |
| LVTAGDVVNHDPVAVGDR       | R | V | 95.00% | 77  |                | 706.3909  | 3 | 4.7  | 623 | 642 | No |
| MDWDKAWDVTVR             | R | T | 95.00% | 79  | M1: Oxidation  | 769.3644  | 2 | 6.4  | 360 | 371 | No |
| MDWDKAWDVTVR             | R | T | 95.00% | 51  | M1: Oxidation  | 513.2452  | 3 | 5.7  | 360 | 371 | No |
| MDWDKAWDVTVR             | R | T | 95.00% | 67  |                | 761.3666  | 2 | 6.1  | 360 | 371 | No |
| MDWDKAWDVTVR             | R | T | 95.00% | 54  |                | 507.9123  | 3 | 3.4  | 360 | 371 | No |
| MSLVEEGAVK               | R | R | 95.00% | 31  | M1: Oxidation  | 1078.5520 | 1 | 5.8  | 429 | 438 | No |
| MSLVEEGAVK               | R | R | 95.00% | 64  | M1: Oxidation  | 539.7773  | 2 | 1.1  | 429 | 438 | No |
| MSLVEEGAVK               | R | R | 95.00% | 59  |                | 531.7801  | 2 | 1.6  | 429 | 438 | No |
| MSLVEEGAVKR              | R | I | 95.00% | 63  | M1: Oxidation  | 617.8291  | 2 | 3.1  | 429 | 439 | No |
| MSLVEEGAVKR              | R | I | 95.00% | 36  | M1: Oxidation  | 412.2218  | 3 | 2.7  | 429 | 439 | No |
| MSLVEEGAVKR              | R | I | 95.00% | 75  |                | 609.8337  | 2 | 6.4  | 429 | 439 | No |
| NIATSGK                  | R | F | 95.00% | 41  |                | 690.3815  | 1 | 4.2  | 805 | 811 | No |
| NLAENISR                 | R | V | 95.00% | 38  |                | 916.4891  | 1 | 4.3  | 271 | 278 | No |
| NLAENISR                 | R | V | 95.00% | 53  |                | 458.7470  | 2 | 1.1  | 271 | 278 | No |
| NNVVTMR                  | R | L | 95.00% | 53  | M7: Oxidation  | 482.2384  | 2 | 1.0  | 236 | 243 | No |
| NNVVTMR                  | R | L | 95.00% | 32  |                | 474.2423  | 2 | 3.7  | 236 | 243 | No |
| PEFTLPVHFYGHVEHTSQGAK    | R | W | 95.00% | 35  |                | 596.0464  | 4 | -2.5 | 195 | 215 | No |
| QEYFVVAATLQDIIR          | K | R | 95.00% | 121 |                | 883.4865  | 2 | 9.1  | 296 | 310 | No |
| QEYFVVAATLQDIIR          | K | R | 95.00% | 56  |                | 589.3236  | 3 | 3.5  | 296 | 310 | No |
| QPDLFK                   | K | D | 95.00% | 28  |                | 747.4090  | 1 | 6.4  | 755 | 760 | No |
| QRLPAPDEAI               | R | - | 95.00% | 49  |                | 1109.6030 | 1 | 6.4  | 833 | 842 | No |
| QRLPAPDEAI               | R | - | 95.00% | 79  |                | 556.3013  | 2 | -0.8 | 833 | 842 | No |
| QVIEQLSSGFFSPK           | R | Q | 95.00% | 130 |                | 783.9155  | 2 | 4.1  | 741 | 754 | No |
| QVIEQLSSGFFSPK           | R | Q | 95.00% | 54  |                | 522.9467  | 3 | 4.8  | 741 | 754 | No |
| REPKNFFVPR               | K | T | 95.00% | 27  |                | 645.3630  | 2 | 4.7  | 593 | 602 | No |
| REPKNFFVPR               | K | T | 95.00% | 48  |                | 430.5771  | 3 | 2.9  | 593 | 602 | No |
| RIYLSLEFYMGR             | K | T | 95.00% | 48  | M11: Oxidation | 576.2944  | 3 | 2.9  | 82  | 94  | No |
| RMSLVEEGAVK              | R | R | 95.00% | 54  | M2: Oxidation  | 412.2219  | 3 | 2.9  | 428 | 438 | No |
| RMSLVEEGAVKR             | R | I | 95.00% | 66  | M2: Oxidation  | 695.8821  | 2 | 6.2  | 428 | 439 | No |
| RMSLVEEGAVKR             | R | I | 95.00% | 52  | M2: Oxidation  | 464.2557  | 3 | 2.8  | 428 | 439 | No |
| RMSLVEEGAVKR             | R | I | 95.00% | 38  |                | 687.8815  | 2 | 1.7  | 428 | 439 | No |
| RMSLVEEGAVKR             | R | I | 95.00% | 56  |                | 458.9236  | 3 | 1.6  | 428 | 439 | No |
| TIAQYAR                  | R | E | 95.00% | 37  |                | 411.7293  | 2 | 4.2  | 817 | 823 | No |
| TIFKDFYELEPHK            | K | F | 95.00% | 49  | Y7: Phospho    | 873.9151  | 2 | 4.3  | 467 | 479 | No |
| TIFKDFYELEPHK            | K | F | 95.00% | 65  |                | 833.9360  | 2 | 9.4  | 467 | 479 | No |
| TIFKDFYELEPHK            | K | F | 95.00% | 49  |                | 556.2896  | 3 | 2.9  | 467 | 479 | No |
| TIFKDFYELEPHK            | K | F | 95.00% | 33  |                | 417.4691  | 4 | 2.6  | 467 | 479 | No |
| TIFKDFYELEPHKFQNK        | K | T | 95.00% | 29  |                | 728.7153  | 3 | 7.7  | 467 | 483 | No |
| TNFDAPFDK                | R | V | 95.00% | 54  |                | 1054.4930 | 1 | 7.6  | 325 | 333 | No |
| TNFDAPFDK                | R | V | 95.00% | 70  |                | 527.7473  | 2 | 2.0  | 325 | 333 | No |
| TNFDAPFDKVAIQLNDTHPSLAIP |   |   |        |     |                |           |   |      |     |     |    |
| ELMR                     | R | I | 95.00% | 48  | M27: Oxidation | 1057.2130 | 3 | 8.0  | 325 | 352 | No |
| TNFDAPFDKVAIQLNDTHPSLAIP |   |   |        |     |                |           |   |      |     |     |    |
| ELMR                     | R | I | 95.00% | 62  | M27: Oxidation | 793.1617  | 4 | 7.6  | 325 | 352 | No |
| TNFDAPFDKVAIQLNDTHPSLAIP |   |   |        |     |                |           |   |      |     |     |    |
| ELMR                     | R | I | 95.00% | 32  |                | 1051.8770 | 3 | 3.3  | 325 | 352 | No |
| TQQHYEYKDPKR             | R | I | 95.00% | 40  |                | 531.6030  | 3 | 6.8  | 71  | 82  | No |
| VAAAFPGDVDR              | R | L | 95.00% | 61  |                | 1117.5700 | 1 | 4.7  | 415 | 425 | No |
| VAAAFPGDVDR              | R | L | 95.00% | 71  |                | 559.2848  | 2 | -2.3 | 415 | 425 | No |
| VAAAFPGDVDR              | R | R | 95.00% | 53  |                | 693.8826  | 2 | 5.6  | 415 | 427 | No |
| VAAAFPGDVDR              | R | R | 95.00% | 36  |                | 462.9233  | 3 | 3.4  | 415 | 427 | No |
| VAIQLNDTHPSLAIPELMR      | K | I | 95.00% | 105 | M18: Oxidation | 1067.5790 | 2 | 8.2  | 334 | 352 | No |
| VAIQLNDTHPSLAIPELMR      | K | I | 95.00% | 66  | M18: Oxidation | 712.0530  | 3 | 4.8  | 334 | 352 | No |
| VAIQLNDTHPSLAIPELMR      | K | I | 95.00% | 104 |                | 1059.5800 | 2 | 6.7  | 334 | 352 | No |
| VAIQLNDTHPSLAIPELMR      | K | I | 95.00% | 55  |                | 706.7212  | 3 | 4.5  | 334 | 352 | No |
| VEDVDKLDQR               | R | G | 95.00% | 87  |                | 608.8141  | 2 | 2.4  | 716 | 725 | No |
| VEDVDKLDQR               | R | G | 95.00% | 53  |                | 406.2118  | 3 | 1.9  | 716 | 725 | No |
| VFADYEDYIK               | K | C | 95.00% | 56  |                | 1262.6010 | 1 | 5.4  | 774 | 783 | No |
| VFADYEDYIK               | K | C | 95.00% | 80  |                | 631.8014  | 2 | 0.3  | 774 | 783 | No |
| VHINPNSLFDIQVK           | K | R | 95.00% | 111 |                | 812.4498  | 2 | 3.6  | 556 | 569 | No |
| VHINPNSLFDIQVK           | K | R | 95.00% | 49  |                | 541.9700  | 3 | 5.1  | 556 | 569 | No |
| VHINPNSLFDIQVKR          | K | I | 95.00% | 34  |                | 890.5015  | 2 | 4.5  | 556 | 570 | No |
| VHINPNSLFDIQVKR          | K | I | 95.00% | 65  |                | 594.0053  | 3 | 7.5  | 556 | 570 | No |
| VIFLENYR                 | R | V | 95.00% | 52  |                | 1053.5810 | 1 | 7.3  | 643 | 650 | No |
| VIFLENYR                 | R | V | 95.00% | 63  |                | 527.2914  | 2 | 1.6  | 643 | 650 | No |
| VIPAADLSEQISTAGTEASGTGN  |   |   |        |     |                |           |   |      |     |     |    |
| MK                       | K | F | 95.00% | 118 | M24: Oxidation | 1232.6090 | 2 | 9.3  | 657 | 681 | No |

|     |                                                                 |                |                                      |   |   |        |     |                |           |   |      |     |     |    |
|-----|-----------------------------------------------------------------|----------------|--------------------------------------|---|---|--------|-----|----------------|-----------|---|------|-----|-----|----|
|     |                                                                 |                | VIPAADLSEQISTAGTEASGTGN              | K | F | 95.00% | 76  | M24: Oxidation | 822.0706  | 3 | 3.3  | 657 | 681 | No |
|     |                                                                 |                | MK                                   |   |   |        |     |                |           |   |      |     |     |    |
|     |                                                                 |                | VIPAADLSEQISTAGTEASGTGN              | K | F | 95.00% | 38  | M24: Oxidation | 616.8058  | 4 | 4.9  | 657 | 681 | No |
|     |                                                                 |                | MK                                   |   |   |        |     |                |           |   |      |     |     |    |
|     |                                                                 |                | VIPAADLSEQISTAGTEASGTGN              | K | F | 95.00% | 106 |                | 1224.6120 | 2 | 9.8  | 657 | 681 | No |
|     |                                                                 |                | MK                                   |   |   |        |     |                |           |   |      |     |     |    |
|     |                                                                 |                | VIPAADLSEQISTAGTEASGTGN              | K | F | 95.00% | 68  |                | 816.7409  | 3 | 5.7  | 657 | 681 | No |
|     |                                                                 |                | MK                                   |   |   |        |     |                |           |   |      |     |     |    |
|     |                                                                 |                | VLYPNDNFFEGK                         | R | E | 95.00% | 83  |                | 721.8549  | 2 | 4.4  | 279 | 290 | No |
|     |                                                                 |                | VSALYKNPR                            | K | E | 95.00% | 47  |                | 524.3029  | 2 | 2.7  | 788 | 796 | No |
|     |                                                                 |                | WPVHLETLTPR                          | R | H | 95.00% | 83  |                | 737.4387  | 2 | 7.5  | 388 | 399 | No |
|     |                                                                 |                | WPVHLETLTPR                          | R | H | 95.00% | 50  |                | 491.9596  | 3 | 3.2  | 388 | 399 | No |
|     |                                                                 |                | WVDTQVVLAMPYDTPVPGYR                 | K | N | 95.00% | 98  | M10: Oxidation | 1162.0830 | 2 | 6.2  | 216 | 235 | No |
|     |                                                                 |                | WVDTQVVLAMPYDTPVPGYR                 | K | N | 95.00% | 69  | M10: Oxidation | 775.0596  | 3 | 8.5  | 216 | 235 | No |
|     |                                                                 |                | YFEGIFNQK                            | R | I | 95.00% | 44  |                | 1145.5740 | 1 | 9.2  | 162 | 170 | No |
|     |                                                                 |                | YFEGIFNQK                            | R | I | 95.00% | 64  |                | 573.2880  | 2 | 4.3  | 162 | 170 | No |
|     |                                                                 |                | YGNPWEK                              | R | A | 95.00% | 31  |                | 893.4239  | 1 | 9.2  | 186 | 192 | No |
|     |                                                                 |                | YGNPWEK                              | R | A | 95.00% | 54  |                | 447.2136  | 2 | 4.2  | 186 | 192 | No |
|     |                                                                 |                | ISOFORM 2 OF INTER-ALPHA-TRYPSIN     |   |   |        |     |                |           |   |      |     |     |    |
|     |                                                                 |                | INHIBITOR HEAVY CHAIN H4 PRECURSOR.; |   |   |        |     |                |           |   |      |     |     |    |
|     |                                                                 |                | ISOFORM 1 OF INTER-ALPHA-TRYPSIN     |   |   |        |     |                |           |   |      |     |     |    |
|     |                                                                 |                | INHIBITOR HEAVY CHAIN H4 PRECURSOR.; |   |   |        |     |                |           |   |      |     |     |    |
|     |                                                                 |                | INTER-ALPHA (GLOBULIN) INHIBITOR H4  |   |   |        |     |                |           |   |      |     |     |    |
|     |                                                                 |                | (PLASMA KALLIKREIN-                  |   |   |        |     |                |           |   |      |     |     |    |
|     |                                                                 |                | SENSITIVEGLYCOPROTEIN) VARIANT       |   |   |        |     |                |           |   |      |     |     |    |
|     |                                                                 |                | (FRAGMENT).; 101 KDA PROTEIN.;       |   |   |        |     |                |           |   |      |     |     |    |
|     |                                                                 |                | 104 KDA                              |   |   |        |     |                |           |   |      |     |     |    |
|     |                                                                 |                | PROTEIN.                             |   |   |        |     |                |           |   |      |     |     |    |
| 325 | IPI00218192; IPI00294193; IPI00556036; IPI00760855; IPI00790993 | ITIH4; TMEM110 | AEAAQYSAAVAK                         | K | G | 95.00% | 64  |                | 654.3381  | 2 | 6.8  | 99  | 111 | No |
|     |                                                                 |                | ANTVQEAATFQMELEPK                    | R | K | 95.00% | 37  | M11: Oxidation | 861.9265  | 2 | 4.5  | 61  | 75  | No |
|     |                                                                 |                | GPDVLTATVSGK                         | R | L | 95.00% | 55  |                | 572.8159  | 2 | 2.0  | 501 | 512 | No |
|     |                                                                 |                | LALDNGGLAR                           | K | R | 95.00% | 27  |                | 500.2848  | 2 | 2.8  | 429 | 438 | No |
|     |                                                                 |                | LGVYELLLK                            | R | V | 95.00% | 47  |                | 524.3295  | 2 | 5.2  | 154 | 162 | No |
|     |                                                                 |                | NMEQFQVSVSVAPNAK                     | R | I | 95.00% | 78  | M2: Oxidation  | 882.9383  | 2 | 5.6  | 124 | 139 | No |
|     |                                                                 |                | SPEQQETVLDGNLIIR                     | K | Y | 95.00% | 63  |                | 906.4871  | 2 | 8.6  | 225 | 240 | No |
| 326 | IPI00218236                                                     | PPP1CB         | SERINE/THREONINE-PROTEIN PHOSPHATASE |   |   |        |     |                |           |   |      |     |     |    |
|     |                                                                 |                | PP1-BETA CATALYTIC SUBUNIT.          |   |   |        |     |                |           |   |      |     |     |    |
|     |                                                                 |                | AHQVVEDGYEFFAK                       | R | R | 95.00% | 85  |                | 820.3969  | 2 | 6.4  | 246 | 259 | No |
|     |                                                                 |                | AHQVVEDGYEFFAK                       | R | R | 95.00% | 76  |                | 547.2626  | 3 | -1.9 | 246 | 259 | No |
|     |                                                                 |                | EIFLSQPILLELEAPLK                    | R | I | 95.00% | 99  |                | 977.0767  | 2 | 7.1  | 43  | 59  | No |
|     |                                                                 |                | EIFLSQPILLELEAPLK                    | R | I | 95.00% | 27  |                | 651.7212  | 3 | 8.4  | 43  | 59  | No |
|     |                                                                 |                | GVSFTFGADVSK                         | R | F | 95.00% | 56  |                | 657.3415  | 2 | 0.7  | 221 | 233 | No |
|     |                                                                 |                | IKYPENFFLLR                          | K | G | 95.00% | 30  |                | 720.4111  | 2 | 6.4  | 111 | 121 | No |
|     |                                                                 |                | IKYPENFFLLR                          | K | G | 95.00% | 68  |                | 480.6076  | 3 | 1.4  | 111 | 121 | No |
|     |                                                                 |                | IVQMTAEAVR                           | K | G | 95.00% | 48  | M4: Oxidation  | 596.3097  | 2 | 5.9  | 26  | 35  | No |
|     |                                                                 |                | YPENFFLLR                            | K | G | 95.00% | 51  |                | 599.8182  | 2 | 1.9  | 113 | 121 | No |
| 327 | IPI00218342; IPI00794900                                        | MTHFD1         | C-1-TETRAHYDROFOLATE SYNTHASE,       |   |   |        |     |                |           |   |      |     |     |    |
|     |                                                                 |                | CYTOPLASMIC.; 105 KDA PROTEIN.       |   |   |        |     |                |           |   |      |     |     |    |
|     |                                                                 |                | AAQAPSSFQLLYDLK                      | R | L | 95.00% | 76  |                | 826.4469  | 2 | 9.8  | 844 | 858 | No |
|     |                                                                 |                | AYIQENLELVEK                         | K | G | 95.00% | 68  |                | 724.8884  | 2 | 3.6  | 761 | 772 | No |
|     |                                                                 |                | DVDGLTSINAGR                         | K | L | 95.00% | 53  |                | 609.3077  | 2 | -4.4 | 123 | 134 | No |
|     |                                                                 |                | EIGLLSEEVELYGETK                     | R | A | 95.00% | 110 |                | 904.9675  | 2 | 5.5  | 376 | 391 | No |
|     |                                                                 |                | EQVPGFTPR                            | K | L | 95.00% | 31  |                | 515.7726  | 2 | 5.0  | 68  | 76  | No |
|     |                                                                 |                | GALALAAQAVQR                         | K | A | 95.00% | 62  |                | 549.3275  | 2 | 3.6  | 833 | 843 | No |
|     |                                                                 |                | GVPTGFILPIR                          | K | D | 95.00% | 72  |                | 585.3616  | 2 | 8.9  | 918 | 928 | No |
|     |                                                                 |                | KGEPVSAEDLVSGALTVLMK                 | K | D | 95.00% | 34  | M20: Oxidation | 706.3803  | 3 | 4.2  | 635 | 655 | No |
|     |                                                                 |                | KITIGQAPTEK                          | R | G | 95.00% | 35  |                | 593.3483  | 2 | 3.6  | 543 | 553 | No |
|     |                                                                 |                | KVVGDVAYDEAK                         | R | E | 95.00% | 48  |                | 647.3431  | 2 | 7.1  | 290 | 301 | No |
|     |                                                                 |                | LAILQVGNR                            | R | D | 95.00% | 70  |                | 492.3074  | 2 | 6.8  | 77  | 85  | No |
|     |                                                                 |                | LDIDPETITWQR                         | R | V | 95.00% | 54  |                | 743.8860  | 2 | 6.5  | 560 | 571 | No |
|     |                                                                 |                | LGIEKTDPTTLTDEEINR                   | R | F | 95.00% | 33  |                | 682.3564  | 3 | 6.3  | 500 | 517 | No |
|     |                                                                 |                | MHGQGPTVTAGLPLPK                     | K | A | 95.00% | 50  | M1: Oxidation  | 774.9190  | 2 | 5.8  | 706 | 721 | No |
|     |                                                                 |                | TAHLDEEVNKGDLVVATGQPE                |   |   |        |     |                |           |   |      |     |     |    |
|     |                                                                 |                | MVK                                  | K | G | 95.00% | 50  | M23: Oxidation | 903.8055  | 3 | 8.7  | 199 | 223 | No |
|     |                                                                 |                | TAHLDEEVNKGDLVVATGQPE                |   |   |        |     |                |           |   |      |     |     |    |
|     |                                                                 |                | MVK                                  | K | G | 95.00% | 31  | M23: Oxidation | 678.1057  | 4 | 8.2  | 238 | 262 | No |
|     |                                                                 |                | TDPTTLTDEEINR                        | K | F | 95.00% | 34  |                | 752.8662  | 2 | 7.5  | 544 | 556 | No |
|     |                                                                 |                | TDTESELDLISR                         | K | L | 95.00% | 78  |                | 689.8415  | 2 | 3.5  | 800 | 811 | No |
|     |                                                                 |                | TPVPSDIDISR                          | K | S | 95.00% | 47  |                | 600.3195  | 2 | 3.3  | 353 | 363 | No |
|     |                                                                 |                | VLLSALER                             | K | L | 95.00% | 38  |                | 450.7818  | 2 | 4.3  | 394 | 401 | No |
|     |                                                                 |                | VVGDVAYDEAK                          | K | E | 95.00% | 51  |                | 583.2951  | 2 | 7.0  | 291 | 301 | No |
|     |                                                                 |                | WMIQYNNLNK                           | K | T | 95.00% | 46  | M2: Oxidation  | 726.8753  | 2 | 8.2  | 342 | 352 | No |
|     |                                                                 |                | YVVVTGITPTPLGEGK                     | K | S | 95.00% | 93  |                | 815.9605  | 2 | 4.5  | 410 | 425 | No |

| Accession                       | Gene                                  | Protein        | Residue                                                                  | Mod                   | Score                        | Count    | Label  | Score | Count          | Score         | Count    | Score | Count | Score | Count |     |
|---------------------------------|---------------------------------------|----------------|--------------------------------------------------------------------------|-----------------------|------------------------------|----------|--------|-------|----------------|---------------|----------|-------|-------|-------|-------|-----|
| 328                             | IPI00218343; IPI00387144; IPI00792677 | TUBA1B; TUBA1C | TUBULIN ALPHA-6 CHAIN.; TUBULIN ALPHA-UBIQUITOUS CHAIN.; 46 KDA PROTEIN. | AFVHWYVGEEMEEGFSEAR   | R                            | E        | 95.00% | 39    | M11: Oxidation | 782.6829      | 3        | 8.3   | 403   | 422   | Yes   |     |
|                                 |                                       |                |                                                                          | AVFVDLEPTVIDEVR       | R                            | T        | 95.00% | 55    |                | 567.9766      | 3        | 4.6   | 65    | 79    | Yes   |     |
|                                 |                                       |                |                                                                          | DVNAAIATIK            | K                            | T        | 95.00% | 40    |                | 508.2967      | 2        | 6.6   | 327   | 336   | Yes   |     |
|                                 |                                       |                |                                                                          | EIDLVLDR              | K                            | I        | 95.00% | 61    |                | 543.3165      | 2        | 3.8   | 113   | 121   | Yes   |     |
|                                 |                                       |                |                                                                          | FDLMYAK               | K                            | R        | 95.00% | 33    |                | M4: Oxidation | 452.2205 | 2     | 5.0   | 395   | 401   | Yes |
|                                 |                                       |                |                                                                          | IHFPLATYAPVISA EK     | R                            | A        | 95.00% | 47    |                |               | 878.9936 | 2     | 8.8   | 265   | 280   | Yes |
|                                 |                                       |                |                                                                          | IHFPLATYAPVISA EK     | R                            | A        | 95.00% | 65    |                |               | 586.3311 | 3     | 7.8   | 265   | 280   | Yes |
|                                 |                                       |                |                                                                          | LISQIVSSITASLR        | R                            | F        | 95.00% | 41    |                |               | 744.4507 | 2     | 9.3   | 230   | 243   | Yes |
|                                 |                                       |                |                                                                          | LISQIVSSITASLR        | R                            | F        | 95.00% | 77    |                |               | 496.6362 | 3     | 8.9   | 230   | 243   | Yes |
|                                 |                                       |                |                                                                          | NLDIERPTYTNLNR        | R                            | L        | 95.00% | 59    |                |               | 859.9529 | 2     | 8.9   | 216   | 229   | Yes |
|                                 |                                       |                |                                                                          | QLFHPEQLITGK          | R                            | E        | 95.00% | 39    |                |               | 705.8959 | 2     | 6.6   | 85    | 96    | Yes |
|                                 |                                       |                |                                                                          | QLFHPEQLITGK          | R                            | E        | 95.00% | 44    |                |               | 470.9336 | 3     | 7.3   | 85    | 96    | Yes |
|                                 |                                       |                |                                                                          | QLFHPEQLITGKEDAANNYAR | R                            | G        | 95.00% | 39    |                |               | 805.7460 | 3     | 7.0   | 85    | 105   | Yes |
|                                 |                                       |                |                                                                          | VGINYQPPTVVPGGDLAK    | K                            | V        | 95.00% | 78    |                |               | 913.0059 | 2     | 9.7   | 353   | 370   | Yes |
|                                 |                                       |                |                                                                          | AVQQPDGLAVLGIFLK      | K                            | V        | 95.00% | 95    |                |               | 834.9957 | 2     | 8.6   | 133   | 148   | No  |
|                                 |                                       |                |                                                                          | AVQQPDGLAVLGIFLK      | K                            | V        | 95.00% | 58    |                |               | 556.9980 | 3     | 5.6   | 133   | 148   | No  |
|                                 |                                       |                |                                                                          | DFPIAK                | K                            | G        | 95.00% | 26    |                |               | 690.3865 | 1     | 5.5   | 19    | 24    | No  |
|                                 |                                       |                |                                                                          | EPISVSSEQVLK          | K                            | F        | 95.00% | 48    |                |               | 658.3636 | 2     | 6.5   | 213   | 224   | No  |
|                                 |                                       |                |                                                                          | GGPLDGTYSR            | K                            | L        | 95.00% | 31    |                |               | 468.2355 | 2     | 4.6   | 81    | 89    | No  |
|                                 |                                       |                |                                                                          | KYAAELHLVHWNTK        | K                            | Y        | 95.00% | 42    |                |               | 570.6459 | 3     | 5.4   | 113   | 126   | No  |
| KYAAELHLVHWNTK                  | K                                     | Y              | 95.00%                                                                   | 31                    | 428.2352                     | 4        | 2.5    | 113   | 126            |               | No       |       |       |       |       |     |
| SADFTNFDPR                      | K                                     | G              | 95.00%                                                                   | 65                    | 585.2683                     | 2        | 5.1    | 172   | 181            |               | No       |       |       |       |       |     |
| VVDVLDSIK                       | K                                     | T              | 95.00%                                                                   | 37                    | 987.5763                     | 1        | 3.7    | 159   | 167            |               | No       |       |       |       |       |     |
| VVDVLDSIK                       | K                                     | T              | 95.00%                                                                   | 52                    | 494.2933                     | 2        | 6.2    | 159   | 167            |               | No       |       |       |       |       |     |
| YAAELHLVHWNTK                   | K                                     | Y              | 95.00%                                                                   | 62                    | 527.9484                     | 3        | 7.5    | 114   | 126            | No            |          |       |       |       |       |     |
| YDPSLKPLSVSYDQATSLR             | K                                     | I              | 95.00%                                                                   | 45                    | 714.0409                     | 3        | 6.7    | 40    | 58             | No            |          |       |       |       |       |     |
| AAVPSGASTGIYEAL ELR             | R                                     | D              | 95.00%                                                                   | 58                    | 942.9679                     | 2        | 9.0    | 33    | 50             | Yes           |          |       |       |       |       |     |
| AAVPSGASTGIYEAL ELR             | R                                     | D              | 95.00%                                                                   | 42                    | 942.9656                     | 2        | 6.5    | 33    | 50             | Yes           |          |       |       |       |       |     |
| AAVPSGASTGIYEAL ELR             | R                                     | D              | 95.00%                                                                   | 60                    | 942.9658                     | 2        | 6.8    | 33    | 50             | Yes           |          |       |       |       |       |     |
| AAVPSGASTGIYEAL ELR             | R                                     | D              | 95.00%                                                                   | 162                   | 902.9806                     | 2        | 4.8    | 33    | 50             | Yes           |          |       |       |       |       |     |
| AAVPSGASTGIYEAL ELR             | R                                     | D              | 95.00%                                                                   | 99                    | 602.3227                     | 3        | 4.4    | 33    | 50             | Yes           |          |       |       |       |       |     |
| AAVPSGASTGIYEAL ELRDGD K        | R                                     | G              | 95.00%                                                                   | 97                    | 1110.5700                    | 2        | 7.7    | 33    | 54             | No            |          |       |       |       |       |     |
| AAVPSGASTGIYEAL ELRDGD K        | R                                     | G              | 95.00%                                                                   | 38                    | 740.7137                     | 3        | 4.7    | 33    | 54             | No            |          |       |       |       |       |     |
| DATNVGDEGGFAPNILENNEAL ELLK     | K                                     | T              | 95.00%                                                                   | 109                   | 1372.1870                    | 2        | 8.6    | 203   | 228            | No            |          |       |       |       |       |     |
| DATNVGDEGGFAPNILENNEAL ELLK     | K                                     | T              | 95.00%                                                                   | 83                    | 915.1279                     | 3        | 9.4    | 203   | 228            | No            |          |       |       |       |       |     |
| FGANAILGVS LAVCKAGAAEK          | K                                     | G              | 95.00%                                                                   | 43                    | 664.0344                     | 3        | 4.0    | 106   | 126            | No            |          |       |       |       |       |     |
| FMIELDGTENK                     | K                                     | S              | 95.00%                                                                   | 56                    | 1312.6170                    | 1        | 5.6    | 93    | 103            | No            |          |       |       |       |       |     |
| FMIELDGTENK                     | K                                     | S              | 95.00%                                                                   | 79                    | 656.8116                     | 2        | 4.4    | 93    | 103            | No            |          |       |       |       |       |     |
| GNPTVEVDLHTAK                   | R                                     | G              | 95.00%                                                                   | 102                   | 690.8623                     | 2        | 3.1    | 16    | 28             | No            |          |       |       |       |       |     |
| GNPTVEVDLHTAK                   | R                                     | G              | 95.00%                                                                   | 57                    | 460.9102                     | 3        | 1.7    | 16    | 28             | No            |          |       |       |       |       |     |
| HIADLAGNPD LILPVPFNVINGG SHAGNK | R                                     | L              | 95.00%                                                                   | 77                    | 1007.8780                    | 3        | 9.1    | 133   | 162            | No            |          |       |       |       |       |     |
| IEEALGDK                        | R                                     | A              | 95.00%                                                                   | 42                    | 874.4570                     | 1        | 5.4    | 413   | 420            | No            |          |       |       |       |       |     |
| IEEALGDK                        | R                                     | A              | 95.00%                                                                   | 67                    | 437.7319                     | 2        | 4.2    | 413   | 420            | No            |          |       |       |       |       |     |
| IEEALGDKAIFAGR                  | R                                     | K              | 95.00%                                                                   | 113                   | 745.4082                     | 2        | 4.7    | 413   | 426            | No            |          |       |       |       |       |     |
| IEEALGDKAIFAGR                  | R                                     | K              | 95.00%                                                                   | 71                    | 497.2741                     | 3        | 3.4    | 413   | 426            | No            |          |       |       |       |       |     |
| IGAEVYHHLK                      | R                                     | G              | 95.00%                                                                   | 32                    | 1166.6380                    | 1        | 4.5    | 184   | 193            | No            |          |       |       |       |       |     |
| IGAEVYHHLK                      | R                                     | G              | 95.00%                                                                   | 64                    | 583.8220                     | 2        | 3.3    | 184   | 193            | No            |          |       |       |       |       |     |
| IGAEVYHHLKGVIK                  | R                                     | A              | 95.00%                                                                   | 49                    | 521.9736                     | 3        | 2.4    | 184   | 197            | No            |          |       |       |       |       |     |
| KLSVVDQEK                       | K                                     | V              | 95.00%                                                                   | 42                    | 523.3012                     | 2        | 4.9    | 81    | 89             | No            |          |       |       |       |       |     |
| KLSVVDQEKVDK                    | K                                     | F              | 95.00%                                                                   | 83                    | 694.3983                     | 2        | 6.5    | 81    | 92             | No            |          |       |       |       |       |     |
| KLSVVDQEKVDK                    | K                                     | F              | 95.00%                                                                   | 29                    | 463.2670                     | 3        | 4.0    | 81    | 92             | No            |          |       |       |       |       |     |
| LAMQEFMILPVGASSFK               | K                                     | E              | 95.00%                                                                   | 101                   | 942.9921                     | 2        | 8.4    | 163   | 179            | No            |          |       |       |       |       |     |
| LAMQEFMILPVGASSFK               | K                                     | E              | 95.00%                                                                   | 126                   | 950.9893                     | 2        | 8.2    | 163   | 179            | No            |          |       |       |       |       |     |
| LAMQEFMILPVGASSFK               | K                                     | E              | 95.00%                                                                   | 68                    | 634.3282                     | 3        | 7.1    | 163   | 179            | No            |          |       |       |       |       |     |
| LAMQEFMILPVGASSFK               | K                                     | E              | 95.00%                                                                   | 128                   | M3: Oxidation, M7: Oxidation | 950.9893 | 2      | 8.1   | 163            | 179           | No       |       |       |       |       |     |
| LAMQEFMILPVGASSFK               | K                                     | E              | 95.00%                                                                   | 68                    | M3: Oxidation, M7: Oxidation | 634.3282 | 3      | 7.1   | 163            | 179           | No       |       |       |       |       |     |
| LAMQEFMILPVGASSFK               | K                                     | E              | 95.00%                                                                   | 130                   | M7: Oxidation                | 942.9920 | 2      | 8.4   | 163            | 179           | No       |       |       |       |       |     |
| LAMQEFMILPVGASSFK               | K                                     | E              | 95.00%                                                                   | 41                    | M7: Oxidation                | 628.9936 | 3      | 2.5   | 163            | 179           | No       |       |       |       |       |     |
| LAMQEFMILPVGASSFK               | K                                     | E              | 95.00%                                                                   | 88                    |                              | 934.9957 | 2      | 9.7   | 163            | 179           | No       |       |       |       |       |     |
| LAMQEFMILPVGASSFK               | K                                     | E              | 95.00%                                                                   | 55                    |                              | 623.6662 | 3      | 9.3   | 163            | 179           | No       |       |       |       |       |     |
| LAQSNGWGVMVSHR                  | K                                     | S              | 95.00%                                                                   | 73                    | M10: Oxidation               | 779.3876 | 2      | 5.2   | 359            | 372           | No       |       |       |       |       |     |
| LAQSNGWGVMVSHR                  | K                                     | S              | 95.00%                                                                   | 49                    | M10: Oxidation               | 519.9263 | 3      | 2.5   | 359            | 372           | No       |       |       |       |       |     |

|     |             |       |                                           |                        |   |   |        |     |                                              |           |   |      |     |     |     |
|-----|-------------|-------|-------------------------------------------|------------------------|---|---|--------|-----|----------------------------------------------|-----------|---|------|-----|-----|-----|
|     |             |       |                                           | LAQSNQWGVMSHR          | K | S | 95.00% | 66  |                                              | 771.3892  | 2 | 3.9  | 359 | 372 | No  |
|     |             |       |                                           | LSVVDQEK               | K | V | 95.00% | 43  |                                              | 459.2528  | 2 | 3.7  | 82  | 89  | No  |
|     |             |       |                                           | LSVVDQEKVDK            | K | F | 95.00% | 77  |                                              | 630.3475  | 2 | 1.8  | 82  | 92  | No  |
|     |             |       |                                           | LSVVDQEKVDFKFIELDGTENK | K | S | 95.00% | 56  | M13: Oxidation                               | 851.7718  | 3 | 9.3  | 82  | 103 | No  |
|     |             |       |                                           | NGKYDLDFK              | R | S | 95.00% | 51  |                                              | 550.2766  | 2 | 2.6  | 254 | 262 | No  |
|     |             |       |                                           | NGKYDLDFKSPDDPAR       | R | H | 95.00% | 98  |                                              | 919.4435  | 2 | 3.7  | 254 | 269 | No  |
|     |             |       |                                           | NGKYDLDFKSPDDPAR       | R | H | 95.00% | 46  |                                              | 613.2986  | 3 | 4.3  | 254 | 269 | No  |
|     |             |       |                                           | NGKYDLDFKSPDDPAR       | R | H | 95.00% | 36  |                                              | 460.2248  | 4 | 1.8  | 254 | 269 | No  |
|     |             |       |                                           | RIQAVEK                | K | K | 95.00% | 31  |                                              | 457.7771  | 2 | 4.3  | 327 | 334 | No  |
|     |             |       |                                           | TAIQAAGYPDK            | K | V | 95.00% | 69  |                                              | 1134.5890 | 1 | 8.0  | 229 | 239 | No  |
|     |             |       |                                           | TAIQAAGYPDK            | K | V | 95.00% | 96  |                                              | 567.7944  | 2 | 1.2  | 229 | 239 | No  |
|     |             |       |                                           | TAIQAAGYPDKVIGMDVAASEF |   |   |        |     |                                              |           |   |      |     |     |     |
|     |             |       |                                           | YR                     | K | N | 95.00% | 71  | M16: Oxidation                               | 1344.6750 | 2 | 3.1  | 229 | 253 | No  |
|     |             |       |                                           | TAIQAAGYPDKVIGMDVAASEF |   |   |        |     |                                              |           |   |      |     |     |     |
|     |             |       |                                           | YR                     | K | N | 95.00% | 78  | M16: Oxidation                               | 896.7895  | 3 | 6.9  | 229 | 253 | No  |
|     |             |       |                                           | TAIQAAGYPDKVIGMDVAASEF |   |   |        |     |                                              |           |   |      |     |     |     |
|     |             |       |                                           | YR                     | K | N | 95.00% | 62  | M16: Oxidation                               | 672.8428  | 4 | 5.0  | 229 | 253 | No  |
|     |             |       |                                           | TAIQAAGYPDKVIGMDVAASEF |   |   |        |     |                                              |           |   |      |     |     |     |
|     |             |       |                                           | YR                     | K | N | 95.00% | 71  |                                              | 891.4601  | 3 | 9.5  | 229 | 253 | No  |
|     |             |       |                                           | VDFKFIELDGTENK         | K | S | 95.00% | 106 | M5: Oxidation                                | 827.9089  | 2 | 6.0  | 90  | 103 | No  |
|     |             |       |                                           | VDFKFIELDGTENK         | K | S | 95.00% | 54  | M5: Oxidation                                | 552.2723  | 3 | 0.7  | 90  | 103 | No  |
|     |             |       |                                           | VNQIGSVTESIQACK        | K | L | 95.00% | 98  |                                              | 788.9106  | 2 | 8.1  | 344 | 358 | No  |
|     |             |       |                                           | VVIGMDVAASEFYR         | K | N | 95.00% | 121 | M5: Oxidation                                | 786.8954  | 2 | 6.4  | 240 | 253 | No  |
|     |             |       |                                           | VVIGMDVAASEFYR         | K | N | 95.00% | 72  | M5: Oxidation                                | 524.9316  | 3 | 3.9  | 240 | 253 | No  |
|     |             |       |                                           | VVIGMDVAASEFYR         | K | N | 95.00% | 110 |                                              | 778.8991  | 2 | 7.8  | 240 | 253 | No  |
|     |             |       |                                           | YDLDFK                 | K | S | 95.00% | 44  |                                              | 400.6961  | 2 | 1.4  | 257 | 262 | Yes |
|     |             |       |                                           | YDLDFKSPDDPAR          | K | H | 95.00% | 65  |                                              | 769.8630  | 2 | 3.3  | 257 | 269 | No  |
|     |             |       |                                           | YDLDFKSPDDPAR          | K | H | 95.00% | 54  |                                              | 513.5775  | 3 | 2.4  | 257 | 269 | No  |
|     |             |       |                                           | YNQLMR                 | K | I | 95.00% | 44  | M5: Oxidation                                | 420.7074  | 2 | 3.7  | 407 | 412 | Yes |
|     |             |       |                                           | YNQLMR                 | K | I | 95.00% | 47  |                                              | 412.7092  | 2 | 2.0  | 407 | 412 | No  |
| 331 | IPI00218568 | PCBD1 | PTERIN-4-ALPHA-CARBINOLAMINE DEHYDRATASE. | AVGWNELEGR             | R | D | 95.00% | 40  |                                              | 565.7861  | 2 | 4.3  | 22  | 31  | No  |
|     |             |       |                                           | DQLLPNLR               | R | A | 95.00% | 30  |                                              | 484.7828  | 2 | 4.8  | 14  | 21  | No  |
| 332 | IPI00218570 | PGAM2 | PHOSPHOGLYCERATE MUTASE 2.                | ALPFWNEEIVPQIK         | R | A | 95.00% | 94  |                                              | 482.4643  | 2 | 5.7  | 163 | 176 | No  |
|     |             |       |                                           | ALPFWNEEIVPQIK         | R | A | 95.00% | 54  |                                              | 561.9794  | 3 | 6.7  | 163 | 176 | No  |
|     |             |       |                                           | AMEAVAAQGK             | K | A | 95.00% | 64  | M2: Oxidation                                | 496.2521  | 2 | 8.2  | 242 | 251 | No  |
|     |             |       |                                           | ELKPTKPMQFLGDEETVR     | K | K | 95.00% | 29  | M8: Oxidation                                | 1067.5560 | 2 | 9.0  | 223 | 240 | No  |
|     |             |       |                                           | ELKPTKPMQFLGDEETVR     | K | K | 95.00% | 54  | M8: Oxidation                                | 712.0399  | 3 | 8.6  | 223 | 240 | No  |
|     |             |       |                                           | ELKPTKPMQFLGDEETVR     | K | K | 95.00% | 95  |                                              | 1059.5590 | 2 | 9.5  | 223 | 240 | No  |
|     |             |       |                                           | HGEEQVK                | K | I | 95.00% | 46  |                                              | 413.7093  | 2 | 6.0  | 107 | 113 | No  |
|     |             |       |                                           | HGESTWNQENR            | R | F | 95.00% | 41  |                                              | 453.2041  | 3 | 6.2  | 11  | 21  | No  |
|     |             |       |                                           | HLEGMSDQAIMELNLTGPIVYE |   |   |        |     |                                              |           |   |      |     |     |     |
|     |             |       |                                           | LNK                    | K | E | 95.00% | 55  | M11: Oxidation                               | 1014.5260 | 3 | 9.4  | 196 | 222 | No  |
|     |             |       |                                           | HLEGMSDQAIMELNLTGPIVYE |   |   |        |     |                                              |           |   |      |     |     |     |
|     |             |       |                                           | LNK                    | K | E | 95.00% | 48  | M5: Oxidation                                | 1014.5250 | 3 | 9.0  | 196 | 222 | No  |
|     |             |       |                                           | HLEGMSDQAIMELNLTGPIVYE |   |   |        |     |                                              |           |   |      |     |     |     |
|     |             |       |                                           | LNK                    | K | E | 95.00% | 63  | M5: Oxidation, M5: Oxidation, M11: Oxidation | 1019.8570 | 3 | 9.6  | 196 | 222 | No  |
|     |             |       |                                           | HPYYNSISK              | K | E | 95.00% | 37  |                                              | 1108.5530 | 1 | 9.0  | 130 | 138 | No  |
|     |             |       |                                           | HYGGLTGLNK             | R | A | 95.00% | 47  |                                              | 1059.5630 | 1 | 4.0  | 91  | 100 | No  |
|     |             |       |                                           | HYGGLTGLNK             | R | A | 95.00% | 56  |                                              | 530.2846  | 2 | 2.3  | 91  | 100 | No  |
|     |             |       |                                           | HYGGLTGLNKAETAAK       | R | H | 95.00% | 104 |                                              | 815.9374  | 2 | 7.0  | 91  | 106 | No  |
|     |             |       |                                           | HYGGLTGLNKAETAAK       | R | H | 95.00% | 48  |                                              | 544.2925  | 3 | 3.8  | 91  | 106 | No  |
|     |             |       |                                           | KAMEAVAAQGK            | R | A | 95.00% | 51  | M3: Oxidation                                | 560.3007  | 2 | 9.1  | 241 | 251 | No  |
|     |             |       |                                           | RSFDIPPPMDEK           | R | H | 95.00% | 48  | M10: Oxidation                               | 772.8810  | 2 | 7.7  | 117 | 129 | No  |
|     |             |       |                                           | RSFDIPPPMDEKHPYYNSISK  | R | E | 95.00% | 31  | M10: Oxidation                               | 878.7690  | 3 | 9.5  | 117 | 138 | No  |
|     |             |       |                                           | RVLIAAHGNSLR           | K | G | 95.00% | 60  |                                              | 653.8948  | 2 | 8.5  | 180 | 191 | No  |
|     |             |       |                                           | RVLIAAHGNSLR           | K | G | 95.00% | 58  |                                              | 436.2637  | 3 | 3.6  | 180 | 191 | No  |
|     |             |       |                                           | SFDIPPPMDEK            | R | H | 95.00% | 70  | M9: Oxidation                                | 694.8262  | 2 | 2.5  | 118 | 129 | No  |
|     |             |       |                                           | SFDIPPPMDEK            | R | H | 95.00% | 59  |                                              | 686.8303  | 2 | 4.8  | 118 | 129 | No  |
|     |             |       |                                           | TLWAILDGTQMWPVVR       | R | T | 95.00% | 60  | M12: Oxidation                               | 710.7131  | 3 | 8.3  | 66  | 83  | No  |
|     |             |       |                                           | TLWAILDGTQMWPVVR       | R | T | 95.00% | 58  |                                              | 1057.5690 | 2 | 9.0  | 66  | 83  | No  |
|     |             |       |                                           | TLWAILDGTQMWPVVR       | R | T | 95.00% | 37  |                                              | 705.3801  | 3 | 6.5  | 66  | 83  | No  |
|     |             |       |                                           | VLIAAHGNSLR            | R | G | 95.00% | 76  |                                              | 575.8382  | 2 | -1.1 | 181 | 191 | No  |

|                 |                                       |       |                                                                                                                                                                                                                        |                          |                          |         |                                        |                    |             |       |                                                                     |                       |          |    |        |     |           |    |     |     |     |    |
|-----------------|---------------------------------------|-------|------------------------------------------------------------------------------------------------------------------------------------------------------------------------------------------------------------------------|--------------------------|--------------------------|---------|----------------------------------------|--------------------|-------------|-------|---------------------------------------------------------------------|-----------------------|----------|----|--------|-----|-----------|----|-----|-----|-----|----|
| 333             | IPI00218571; IPI00514085              | PHKB  | ISOFORM 1 OF PHOSPHORYLASE B KINASE REGULATORY SUBUNIT BETA.; ISOFORM 2 OF PHOSPHORYLASE B KINASE REGULATORY SUBUNIT BETA.                                                                                             | AYLQLGINEK               | K                        | L       | 95.00%                                 | 54                 | 574.8228    | 2     | 5.3                                                                 | 530                   | 539      | No |        |     |           |    |     |     |     |    |
|                 |                                       |       |                                                                                                                                                                                                                        | EAFNEFOK                 | K                        | D       | 95.00%                                 | 39                 | 506.7433    | 2     | 4.8                                                                 | 1023                  | 1030     | No |        |     |           |    |     |     |     |    |
|                 |                                       |       |                                                                                                                                                                                                                        | FNPILDMLAALK             | R                        | K       | 95.00%                                 | 46                 | 681.3818    | 2     | 3.9                                                                 | 624                   | 635      | No |        |     |           |    |     |     |     |    |
|                 |                                       |       |                                                                                                                                                                                                                        | FSSSIAPHITTFVLVHGK       | K                        | Q       | 95.00%                                 | 33                 | 921.5034    | 2     | 4.2                                                                 | 785                   | 801      | No |        |     |           |    |     |     |     |    |
|                 |                                       |       |                                                                                                                                                                                                                        | FSSSIAPHITTFVLVHGK       | K                        | Q       | 95.00%                                 | 31                 | 614.6744    | 3     | 8.9                                                                 | 785                   | 801      | No |        |     |           |    |     |     |     |    |
|                 |                                       |       |                                                                                                                                                                                                                        | FSSSIAPHITTFVLVHGK       | K                        | Q       | 95.00%                                 | 34                 | 461.2568    | 4     | 6.8                                                                 | 785                   | 801      | No |        |     |           |    |     |     |     |    |
|                 |                                       |       |                                                                                                                                                                                                                        | GGDKPALDLYQLSPSEVK       | R                        | Q       | 95.00%                                 | 110                | 959.0101    | 2     | 7.9                                                                 | 891                   | 908      | No |        |     |           |    |     |     |     |    |
|                 |                                       |       |                                                                                                                                                                                                                        | GGDKPALDLYQLSPSEVK       | R                        | Q       | 95.00%                                 | 31                 | 639.6766    | 3     | 8.9                                                                 | 884                   | 901      | No |        |     |           |    |     |     |     |    |
|                 |                                       |       |                                                                                                                                                                                                                        | ISDTEELPEFK              | R                        | S       | 95.00%                                 | 74                 | 654.3277    | 2     | 7.8                                                                 | 666                   | 676      | No |        |     |           |    |     |     |     |    |
|                 |                                       |       |                                                                                                                                                                                                                        | LLADELISPK               | K                        | D       | 95.00%                                 | 53                 | 549.8269    | 2     | 4.2                                                                 | 446                   | 455      | No |        |     |           |    |     |     |     |    |
|                 |                                       |       |                                                                                                                                                                                                                        | QDDMTSFYNTPLPK           | K                        | R       | 95.00%                                 | 31                 | 865.3974    | 2     | 7.1                                                                 | 1041                  | 1055     | No |        |     |           |    |     |     |     |    |
|                 |                                       |       |                                                                                                                                                                                                                        | QVTLGAFGHHEEVISNPLSPR    | K                        | V       | 95.00%                                 | 35                 | 760.7304    | 3     | 5.8                                                                 | 809                   | 829      | No |        |     |           |    |     |     |     |    |
|                 |                                       |       |                                                                                                                                                                                                                        | STLLLYQSPTTGLFPTK        | K                        | T       | 95.00%                                 | 93                 | 934.0231    | 2     | 8.8                                                                 | 58                    | 74       | No |        |     |           |    |     |     |     |    |
|                 |                                       |       |                                                                                                                                                                                                                        | 334                      | IPI00218733; IPI00783680 | SOD1    | 16 KDA PROTEIN.; SUPEROXIDE DISMUTASE. | VIQNIYYK           | R           | C     | 95.00%                                                              | 38                    | 577.3396 | 2  | 7.9    | 823 | 831       | No |     |     |     |    |
| VPDFGVWER       | R                                     | G     | 95.00%                                                                                                                                                                                                                 |                          |                          |         |                                        | 50                 | 552.7795    | 2     | 3.0                                                                 | 208                   | 216      | No |        |     |           |    |     |     |     |    |
| VWQILER         | R                                     | T     | 95.00%                                                                                                                                                                                                                 |                          |                          |         |                                        | 46                 | 472.2742    | 2     | 4.3                                                                 | 938                   | 944      | No |        |     |           |    |     |     |     |    |
| YYYYPADFVEYEK   | K                                     | N     | 95.00%                                                                                                                                                                                                                 |                          |                          |         |                                        | 40                 | 843.3969    | 2     | 7.1                                                                 | 402                   | 414      | No |        |     |           |    |     |     |     |    |
| GDGPVQGIINFEQK  | K                                     | A     | 95.00%                                                                                                                                                                                                                 |                          |                          |         |                                        | 90                 | 751.3935    | 2     | 9.3                                                                 | 11                    | 24       | No |        |     |           |    |     |     |     |    |
| GDGPVQGIINFEQK  | K                                     | A     | 95.00%                                                                                                                                                                                                                 |                          |                          |         |                                        | 69                 | 501.2645    | 3     | 8.4                                                                 | 11                    | 24       | No |        |     |           |    |     |     |     |    |
| HVGD LGNV TADK  | R                                     | D     | 95.00%                                                                                                                                                                                                                 |                          |                          |         |                                        | 87                 | 613.3174    | 2     | 7.4                                                                 | 83                    | 94       | No |        |     |           |    |     |     |     |    |
| 335             | IPI00218847; IPI00219861; IPI00410615 | ACP1  | ISOFORM 2 OF LOW MOLECULAR WEIGHT PHOSPHOTYROSINE PROTEIN PHOSPHATASE.; ISOFORM 1 OF LOW MOLECULAR WEIGHT PHOSPHOTYROSINE PROTEIN PHOSPHATASE.; ISOFORM 3 OF LOW MOLECULAR WEIGHT PHOSPHOTYROSINE PROTEIN PHOSPHATASE. |                          |                          |         |                                        | IELLGSYDPQK        | K           | Q     | 95.00%                                                              | 55                    | 631.8409 | 2  | 8.4    | 114 | 124       | No |     |     |     |    |
|                 |                                       |       |                                                                                                                                                                                                                        |                          |                          |         |                                        | LVTDQNISENWR       | K           | V     | 95.00%                                                              | 64                    | 737.8733 | 2  | 6.6    | 30  | 41        | No |     |     |     |    |
|                 |                                       |       |                                                                                                                                                                                                                        |                          |                          |         |                                        | SPIAEAVFR          | R           | K     | 95.00%                                                              | 59                    | 495.2779 | 2  | 5.9    | 20  | 28        | No |     |     |     |    |
|                 |                                       |       |                                                                                                                                                                                                                        |                          |                          |         |                                        | VDSAATSGYEIGNPPDYR | R           | G     | 95.00%                                                              | 99                    | 956.4471 | 2  | 7.3    | 42  | 59        | No |     |     |     |    |
|                 |                                       |       |                                                                                                                                                                                                                        |                          |                          |         |                                        | 336                | IPI00218848 | ATP5I | ATP SYNTHASE, H+ TRANSPORTING, MITOCHONDRIAL F0 COMPLEX, SUBUNIT E. | ELAEDDSILK            | R        | -  | 95.00% | 48  | 566.7939  | 2  | 5.3 | 63  | 72  | No |
|                 |                                       |       |                                                                                                                                                                                                                        |                          |                          |         |                                        |                    |             |       |                                                                     | MVPPVQVSPLIK          | K        | L  | 95.00% | 26  | 662.3954  | 2  | 9.0 | 4   | 15  | No |
|                 |                                       |       |                                                                                                                                                                                                                        |                          |                          |         |                                        |                    |             |       |                                                                     | YSALFLGVAYGATR        | R        | Y  | 95.00% | 120 | 744.9011  | 2  | 6.2 | 19  | 32  | No |
|                 |                                       |       |                                                                                                                                                                                                                        | YSALFLGVAYGATR           | R                        | Y       | 95.00%                                 |                    |             |       |                                                                     | 44                    | 496.9369 | 3  | 6.7    | 19  | 32        | No |     |     |     |    |
|                 |                                       |       |                                                                                                                                                                                                                        | 337                      | IPI00218914              | ALDH1A1 | RETINAL DEHYDROGENASE 1.               |                    |             |       |                                                                     | ANNTFYGLSAGVFTK       | R        | D  | 95.00% | 102 | 795.4093  | 2  | 9.1 | 421 | 435 | No |
|                 |                                       |       |                                                                                                                                                                                                                        |                          |                          |         |                                        |                    |             |       |                                                                     | EAGFPVGVNIVPGYGTAGAAI | K        | V  | 95.00% | 35  | 1028.5200 | 3  | 9.7 | 211 | 241 | No |
|                 |                                       |       |                                                                                                                                                                                                                        |                          |                          |         |                                        |                    |             |       |                                                                     | SSHMDIDK              | K        | F  | 95.00% | 56  | 717.8732  | 2  | 5.7 | 399 | 410 | No |
|                 |                                       |       |                                                                                                                                                                                                                        |                          |                          |         |                                        |                    |             |       |                                                                     | EEIFGVPQQIMK          | R        | T  | 95.00% | 83  | 850.8965  | 2  | 2.5 | 477 | 490 | No |
|                 |                                       |       |                                                                                                                                                                                                                        |                          |                          |         |                                        |                    |             |       |                                                                     | ELGEYGFHEYTEVK        | R        | T  | 95.00% | 83  | 850.8965  | 2  | 2.5 | 477 | 490 | No |
|                 |                                       |       |                                                                                                                                                                                                                        |                          |                          |         |                                        |                    |             |       |                                                                     | GYFVQPTVFSNVTDEM      | K        | I  | 95.00% | 114 | 1003.4800 | 2  | 9.6 | 379 | 395 | No |
| IAKEEIFGVPQQIMK | R                                     | F     | 95.00%                                                                                                                                                                                                                 |                          |                          |         |                                        |                    |             |       |                                                                     | 73                    | 873.9826 | 2  | 6.1    | 396 | 410       | No |     |     |     |    |
| IFINNEWHDSVSGK  | K                                     | K     | 95.00%                                                                                                                                                                                                                 |                          |                          |         |                                        |                    |             |       |                                                                     | 90                    | 823.4098 | 2  | 8.8    | 23  | 36        | No |     |     |     |    |
| IFINNEWHDSVSGK  | K                                     | K     | 95.00%                                                                                                                                                                                                                 |                          |                          |         |                                        |                    |             |       |                                                                     | 32                    | 549.2731 | 3  | 3.8    | 23  | 36        | No |     |     |     |    |
| IFVEESIYDEFVR   | R                                     | R     | 95.00%                                                                                                                                                                                                                 |                          |                          |         |                                        |                    |             |       |                                                                     | 74                    | 823.4152 | 2  | 6.8    | 309 | 321       | No |     |     |     |    |
| ILDIESGKK       | K                                     | E     | 95.00%                                                                                                                                                                                                                 |                          |                          |         |                                        | 44                 | 558.3403    | 2     | 4.5                                                                 | 354                   | 363      | No |        |     |           |    |     |     |     |    |
| LLLATMESMNGGK   | R                                     | L     | 95.00%                                                                                                                                                                                                                 |                          |                          |         |                                        | 69                 | 698.8470    | 2     | 3.2                                                                 | 101                   | 113      | No |        |     |           |    |     |     |     |    |
| QAFQIGSPWR      | R                                     | T     | 95.00%                                                                                                                                                                                                                 |                          |                          |         |                                        | 58                 | 595.3126    | 2     | 4.6                                                                 | 69                    | 78       | No |        |     |           |    |     |     |     |    |
| 338             | IPI00219018; IPI00789134; IPI00795257 | GAPDH | GLYCERALDEHYDE-3-PHOSPHATE DEHYDROGENASE.; GLYCERALDEHYDE-3-PHOSPHATE DEHYDROGENASE.; 32 KDA PROTEIN.                                                                                                                  |                          |                          |         |                                        | TIPIDGNFFTYTR      | R           | H     | 95.00%                                                              | 59                    | 772.8965 | 2  | 6.5    | 144 | 156       | No |     |     |     |    |
|                 |                                       |       |                                                                                                                                                                                                                        | TVTVK                    | K                        | I       | 95.00%                                 | 29                 | 547.3508    | 1     | 9.6                                                                 | 491                   | 495      | No |        |     |           |    |     |     |     |    |
|                 |                                       |       |                                                                                                                                                                                                                        | VAFTGSTEVGK              | K                        | L       | 95.00%                                 | 44                 | 548.2901    | 2     | 3.3                                                                 | 242                   | 252      | No |        |     |           |    |     |     |     |    |
|                 |                                       |       |                                                                                                                                                                                                                        | YILGNPLTPGVTTQGPQIDKEQYD | K                        | I       | 95.00%                                 | 31                 | 892.1363    | 3     | 7.5                                                                 | 330                   | 353      | No |        |     |           |    |     |     |     |    |
|                 |                                       |       |                                                                                                                                                                                                                        | AGAHLQGGAK               | K                        | R       | 95.00%                                 | 59                 | 455.2518    | 2     | 5.6                                                                 | 108                   | 117      | No |        |     |           |    |     |     |     |    |
|                 |                                       |       |                                                                                                                                                                                                                        | GALQNIIPASTGAAK          | R                        | A       | 95.00%                                 | 105                | 706.3998    | 2     | 0.5                                                                 | 201                   | 215      | No |        |     |           |    |     |     |     |    |
|                 |                                       |       |                                                                                                                                                                                                                        | GALQNIIPASTGAAK          | R                        | A       | 95.00%                                 | 38                 | 471.2732    | 3     | 9.2                                                                 | 126                   | 140      | No |        |     |           |    |     |     |     |    |
|                 |                                       |       |                                                                                                                                                                                                                        | GALQNIIPASTGAAKAVGK      | R                        | V       | 95.00%                                 | 24                 | 589.6806    | 3     | 7.5                                                                 | 126                   | 144      | No |        |     |           |    |     |     |     |    |
|                 |                                       |       |                                                                                                                                                                                                                        | GILGYTEHQVSSDFNSDTHSST   | K                        | L       | 95.00%                                 | 63                 | 1009.9880   | 4     | 8.2                                                                 | 272                   | 309      | No |        |     |           |    |     |     |     |    |
|                 |                                       |       |                                                                                                                                                                                                                        | FDAGAGIALNDHFVK          | K                        | L       | 95.00%                                 | 63                 | 1009.9880   | 4     | 8.2                                                                 | 272                   | 309      | No |        |     |           |    |     |     |     |    |
|                 |                                       |       |                                                                                                                                                                                                                        | IKWGDAGA EYVVESTGVFTTME  | K                        | A       | 95.00%                                 | 114                | 1267.6170   | 2     | 4.9                                                                 | 85                    | 107      | No |        |     |           |    |     |     |     |    |
|                 |                                       |       |                                                                                                                                                                                                                        | K                        | K                        | A       | 95.00%                                 | 114                | 1267.6170   | 2     | 4.9                                                                 | 85                    | 107      | No |        |     |           |    |     |     |     |    |



|     |                                                    |        |                                                                                             |                           |   |   |        |     |                    |           |   |      |     |     |    |
|-----|----------------------------------------------------|--------|---------------------------------------------------------------------------------------------|---------------------------|---|---|--------|-----|--------------------|-----------|---|------|-----|-----|----|
|     |                                                    |        |                                                                                             | VVDLMAHMASKE              | R | - | 95.00% | 52  | M5: Oxidation, M8: | 454.8871  | 3 | 4.4  | 249 | 260 | No |
|     |                                                    |        |                                                                                             | VVDLMAHMASKE              | R | - | 95.00% | 70  | Oxidation          | 673.8275  | 2 | 1.7  | 324 | 335 | No |
|     |                                                    |        |                                                                                             | VVDLMAHMASKE              | R | - | 95.00% | 36  | M8: Oxidation      | 449.5545  | 3 | 2.2  | 324 | 335 | No |
|     |                                                    |        |                                                                                             | VVDLMAHMASKE              | R | - | 95.00% | 81  | M8: Oxidation      | 665.8329  | 2 | 6.1  | 324 | 335 | No |
|     |                                                    |        |                                                                                             | VVDLMAHMASKE              | R | - | 95.00% | 35  |                    | 444.2246  | 3 | 6.1  | 324 | 335 | No |
|     |                                                    |        |                                                                                             | WGDAGAEYVVESTGVFTTMEK     | K | A | 95.00% | 153 | M19: Oxidation     | 1147.0320 | 2 | 9.9  | 87  | 107 | No |
|     |                                                    |        |                                                                                             | WGDAGAEYVVESTGVFTTMEK     | K | A | 95.00% | 107 | M19: Oxidation     | 765.0239  | 3 | 9.8  | 87  | 107 | No |
|     |                                                    |        |                                                                                             | WGDAGAEYVVESTGVFTTMEK     | K | A | 95.00% | 152 |                    | 1139.0330 | 2 | 8.6  | 87  | 107 | No |
|     |                                                    |        |                                                                                             | WGDAGAEYVVESTGVFTTMEK     | K | A | 95.00% | 72  |                    | 759.6900  | 3 | 7.0  | 87  | 107 | No |
| 339 | IPI00219025                                        | GLRX   | GLUTAREDOXIN-1.                                                                             | AQEILSQLPIK               | R | Q | 95.00% | 72  |                    | 620.3755  | 2 | 9.5  | 29  | 39  | No |
|     |                                                    |        |                                                                                             | RAQEILSQLPIK              | R | Q | 95.00% | 91  |                    | 465.9517  | 3 | 4.8  | 28  | 39  | No |
|     |                                                    |        |                                                                                             | APPSVFAEVPQAQPVLVFK       | M | L | 95.00% | 111 |                    | 1012.5740 | 2 | 8.9  | 2   | 20  | No |
|     |                                                    |        |                                                                                             | APPSVFAEVPQAQPVLVFK       | M | L | 95.00% | 69  |                    | 675.3845  | 3 | 7.8  | 2   | 20  | No |
|     |                                                    |        |                                                                                             | EPESILQVLSQMEK            | K | I | 95.00% | 51  | M12: Oxidation     | 823.9260  | 2 | 7.8  | 277 | 290 | No |
|     |                                                    |        |                                                                                             | EPESILQVLSQMEK            | K | I | 95.00% | 95  |                    | 815.9230  | 2 | 1.0  | 277 | 290 | No |
|     |                                                    |        |                                                                                             | FLFPFFDSAYQGFASGNLER      | R | D | 95.00% | 105 |                    | 1157.0600 | 2 | 5.7  | 217 | 236 | No |
|     |                                                    |        |                                                                                             | FLFPFFDSAYQGFASGNLER      | R | D | 95.00% | 71  |                    | 771.7112  | 3 | 8.7  | 217 | 236 | No |
|     |                                                    |        |                                                                                             | HIYLLPSGR                 | K | I | 95.00% | 45  |                    | 1055.6080 | 1 | 7.4  | 379 | 387 | No |
|     |                                                    |        |                                                                                             | HIYLLPSGR                 | K | I | 95.00% | 35  |                    | 528.3082  | 2 | 7.9  | 379 | 387 | No |
|     |                                                    |        |                                                                                             | IANDNSLNHEYLPIGLAEFR      | K | S | 95.00% | 122 |                    | 1200.1310 | 2 | 7.6  | 61  | 81  | No |
|     |                                                    |        |                                                                                             | IANDNSLNHEYLPIGLAEFR      | K | S | 95.00% | 57  |                    | 800.4241  | 3 | 8.6  | 61  | 81  | No |
|     |                                                    |        |                                                                                             | IANDNSLNHEYLPIGLAEFR      | K | S | 95.00% | 40  |                    | 600.5701  | 4 | 8.8  | 61  | 81  | No |
|     |                                                    |        |                                                                                             | IGADFLAR                  | R | W | 95.00% | 33  |                    | 862.4842  | 1 | 6.2  | 115 | 122 | No |
|     |                                                    |        |                                                                                             | IGADFLAR                  | R | W | 95.00% | 86  |                    | 431.7443  | 2 | 2.2  | 115 | 122 | No |
|     |                                                    |        |                                                                                             | INVSGLTTK                 | R | N | 95.00% | 48  |                    | 932.5414  | 1 | -0.4 | 388 | 396 | No |
|     |                                                    |        |                                                                                             | INVSGLTTK                 | R | N | 95.00% | 53  |                    | 466.7754  | 2 | 1.3  | 388 | 396 | No |
|     |                                                    |        |                                                                                             | ITWSNPPAQGAR              | R | I | 95.00% | 82  |                    | 649.3370  | 2 | 0.6  | 294 | 305 | No |
|     |                                                    |        |                                                                                             | IVASTLSNPELFEEWTVGNVK     | R | T | 95.00% | 83  |                    | 1117.5810 | 2 | 9.0  | 306 | 325 | No |
|     |                                                    |        |                                                                                             | IVASTLSNPELFEEWTVGNVK     | R | T | 95.00% | 67  |                    | 745.3892  | 3 | 7.9  | 306 | 325 | No |
|     |                                                    |        |                                                                                             | KVNLGVGAYR                | R | T | 95.00% | 69  |                    | 538.8179  | 2 | 5.9  | 33  | 42  | No |
|     |                                                    |        |                                                                                             | LALGDDSPALK               | R | E | 95.00% | 51  |                    | 1099.6060 | 1 | 4.9  | 87  | 97  | No |
|     |                                                    |        |                                                                                             | LALGDDSPALK               | R | E | 95.00% | 72  |                    | 550.3052  | 2 | 2.1  | 87  | 97  | No |
|     |                                                    |        |                                                                                             | LALGDDSPALKEK             | R | R | 95.00% | 68  |                    | 678.8738  | 2 | 1.5  | 87  | 99  | No |
|     |                                                    |        |                                                                                             | NFGLYNER                  | K | V | 95.00% | 31  |                    | 1012.4890 | 1 | 4.0  | 260 | 267 | No |
|     |                                                    |        |                                                                                             | NFGLYNER                  | K | V | 95.00% | 49  |                    | 506.7469  | 2 | 0.7  | 260 | 267 | No |
|     |                                                    |        |                                                                                             | NLDYVATSIHEAVTK           | K | I | 95.00% | 134 |                    | 830.9374  | 2 | 7.4  | 397 | 411 | No |
|     |                                                    |        |                                                                                             | NLDYVATSIHEAVTK           | K | I | 95.00% | 56  |                    | 554.2923  | 3 | 4.0  | 397 | 411 | No |
|     |                                                    |        |                                                                                             | NTPVYVSSPTWENHNAVFSAAAGFK | K | D | 95.00% | 43  |                    | 875.0981  | 3 | 8.0  | 131 | 154 | No |
|     |                                                    |        |                                                                                             | QVEYLVNEK                 | K | H | 95.00% | 52  |                    | 1121.5930 | 1 | 7.6  | 370 | 378 | No |
|     |                                                    |        |                                                                                             | QVEYLVNEK                 | K | H | 95.00% | 60  |                    | 561.2977  | 2 | 2.8  | 370 | 378 | No |
|     |                                                    |        |                                                                                             | RVGGVQSLGGTGALR           | K | I | 95.00% | 94  |                    | 714.4111  | 2 | 4.2  | 100 | 114 | No |
|     |                                                    |        |                                                                                             | RVGGVQSLGGTGALR           | K | I | 95.00% | 55  |                    | 476.6093  | 3 | 2.7  | 100 | 114 | No |
|     |                                                    |        |                                                                                             | TPGTWNHITDQIGMFSFTGLNPK   | K | Q | 95.00% | 47  | M14: Oxidation     | 1289.6200 | 2 | -2.7 | 347 | 369 | No |
|     |                                                    |        |                                                                                             | TPGTWNHITDQIGMFSFTGLNPK   | K | Q | 95.00% | 100 | M14: Oxidation     | 860.0925  | 3 | 8.5  | 347 | 369 | No |
|     |                                                    |        |                                                                                             | YGGVQSLGGTGALR            | R | I | 95.00% | 110 |                    | 636.3604  | 2 | 4.4  | 101 | 114 | No |
|     |                                                    |        |                                                                                             | VGNLTVVGK                 | R | E | 95.00% | 72  |                    | 443.7729  | 2 | 1.8  | 268 | 276 | No |
|     |                                                    |        |                                                                                             | VGNLTVVGKEPESILQVLSQMEK   | R | I | 95.00% | 66  | M21: Oxidation     | 838.7947  | 3 | 7.9  | 268 | 290 | No |
|     |                                                    |        |                                                                                             | VGNLTVVGKEPESILQVLSQMEK   | R | I | 95.00% | 29  |                    | 833.4634  | 3 | 8.2  | 268 | 290 | No |
|     |                                                    |        |                                                                                             | VNLGVGAYR                 | K | T | 95.00% | 62  |                    | 474.7682  | 2 | 2.0  | 34  | 42  | No |
| 341 | IPI00219034                                        | NDUFA8 | NADH DEHYDROGENASE [UBIQUINONE] 1 ALPHA SUBCOMPLEX SUBUNIT 8.                               | PGIVELPTLEELKVDEVK        | M | I | 95.00% | 69  |                    | 670.0516  | 3 | 8.5  | 2   | 19  | No |
|     |                                                    |        |                                                                                             | PRPDPSPEIEGDLQPATHGSR     | R | F | 95.00% | 41  |                    | 564.7841  | 4 | 5.3  | 146 | 166 | No |
|     |                                                    |        |                                                                                             | TDRPLPENPYHSR             | K | P | 95.00% | 37  |                    | 527.9338  | 3 | 5.2  | 133 | 145 | No |
|     |                                                    |        |                                                                                             | VKTDRPLPENPYHSR           | K | P | 95.00% | 44  |                    | 603.6544  | 3 | 3.7  | 131 | 145 | No |
|     |                                                    |        |                                                                                             | EDILENQFMDSR              | R | M | 95.00% | 44  | M9: Oxidation      | 756.8418  | 2 | 7.7  | 97  | 108 | No |
| 342 | IPI00219067; IPI00639805; IPI00645360; IPI00645711 | GSTM2  | GLUTATHIONE S-TRANSFERASE MU 2.; 26 KDA PROTEIN.; GLUTATHIONE TRANSFERASE.; 28 KDA PROTEIN. | EQIREIDILENQFMDSR         | K | M | 95.00% | 39  | M13: Oxidation     | 680.3285  | 3 | 9.5  | 93  | 108 | No |
|     |                                                    |        |                                                                                             | ITFVDFIAYDVLER            | K | N | 95.00% | 44  |                    | 567.6402  | 3 | 8.8  | 153 | 166 | No |

|     |                                                    |        |                                         |                        |   |   |        |     |                              |  |           |   |     |     |     |     |
|-----|----------------------------------------------------|--------|-----------------------------------------|------------------------|---|---|--------|-----|------------------------------|--|-----------|---|-----|-----|-----|-----|
|     |                                                    |        |                                         | ITQSNAILR              | K | Y | 95.00% | 79  |                              |  | 508.3018  | 2 | 5.6 | 70  | 78  | Yes |
|     |                                                    |        |                                         | KYTMGDAPDYDR           | K | S | 95.00% | 69  | M4: Oxidation                |  | 724.3179  | 2 | 8.0 | 32  | 43  | No  |
|     |                                                    |        |                                         | KYTMGDAPDYDR           | K | S | 95.00% | 44  | M4: Oxidation                |  | 483.2135  | 3 | 5.9 | 32  | 43  | No  |
|     |                                                    |        |                                         | LGLDFPNLPYLIDGTHK      | K | I | 95.00% | 73  |                              |  | 957.0208  | 2 | 8.4 | 53  | 69  | No  |
|     |                                                    |        |                                         | LGLDFPNLPYLIDGTHK      | K | I | 95.00% | 35  |                              |  | 638.3497  | 3 | 8.3 | 53  | 69  | No  |
|     |                                                    |        |                                         | LKPEYLQALPEMLK         | K | L | 95.00% | 30  | M12: Oxidation               |  | 844.9758  | 2 | 8.1 | 123 | 136 | No  |
|     |                                                    |        |                                         | LLLEYTDSSEEEK          | R | K | 95.00% | 80  |                              |  | 795.3910  | 2 | 9.8 | 19  | 31  | No  |
|     |                                                    |        |                                         | LLLEYTDSSEEEKK         | R | Y | 95.00% | 55  |                              |  | 859.4392  | 2 | 9.9 | 19  | 32  | No  |
|     |                                                    |        |                                         | LYSQFLGK               | K | Q | 95.00% | 35  |                              |  | 478.2687  | 2 | 4.3 | 137 | 144 | No  |
|     |                                                    |        |                                         | PMTLGYWNIR             | M | G | 95.00% | 35  | M2: Oxidation                |  | 633.8246  | 2 | 8.6 | 2   | 11  | No  |
|     |                                                    |        |                                         | PMTLGYWNIR             | M | G | 95.00% | 61  |                              |  | 625.8245  | 2 | 4.5 | 2   | 11  | No  |
|     |                                                    |        |                                         | YTMGDAPDYDR            | K | S | 95.00% | 43  | M3: Oxidation                |  | 660.2703  | 2 | 8.6 | 33  | 43  | No  |
| 343 | IPI00219077                                        | LTA4H  | ISOFORM 1 OF LEUKOTRIENE A-4 HYDROLASE. | ASMHPVTAMLVGK          | K | D | 95.00% | 59  | M3: Oxidation, M9: Oxidation |  | 458.5713  | 3 | 4.5 | 594 | 606 | No  |
|     |                                                    |        |                                         | DGETPDPEDPSR           | R | K | 95.00% | 31  |                              |  | 657.7813  | 2 | 7.2 | 176 | 187 | No  |
|     |                                                    |        |                                         | EDDLNSFNATDLK          | K | D | 95.00% | 94  |                              |  | 741.3466  | 2 | 6.1 | 481 | 493 | No  |
|     |                                                    |        |                                         | ELVALMSAIR             | K | D | 95.00% | 50  | M6: Oxidation                |  | 559.8203  | 2 | 7.4 | 166 | 175 | No  |
|     |                                                    |        |                                         | GSPMEISLPIALSK         | K | N | 95.00% | 70  | M4: Oxidation                |  | 729.9012  | 2 | 4.6 | 84  | 97  | No  |
|     |                                                    |        |                                         | HFNALGGWELQNSVK        | R | T | 95.00% | 79  |                              |  | 586.3020  | 3 | 7.6 | 340 | 355 | No  |
|     |                                                    |        |                                         | LTYTAEVSVPK            | K | E | 95.00% | 78  |                              |  | 604.3355  | 2 | 4.7 | 155 | 165 | No  |
|     |                                                    |        |                                         | LVVDLTDIDPDVAYSSVPYEK  | K | G | 95.00% | 106 |                              |  | 1169.5960 | 2 | 5.4 | 366 | 386 | No  |
|     |                                                    |        |                                         | LVVDLTDIDPDVAYSSVPYEK  | K | G | 95.00% | 45  |                              |  | 780.0694  | 3 | 9.3 | 366 | 386 | No  |
|     |                                                    |        |                                         | MQEVYFNAINNSEIR        | R | F | 95.00% | 131 | M1: Oxidation                |  | 979.4633  | 2 | 5.7 | 521 | 546 | No  |
|     |                                                    |        |                                         | SAYEFSETESMLK          | K | I | 95.00% | 67  | M11: Oxidation               |  | 769.3457  | 2 | 6.7 | 231 | 243 | No  |
|     |                                                    |        |                                         | SLSNVIAHEISHSWTGNLVTNK | K | T | 95.00% | 48  |                              |  | 803.0884  | 3 | 5.4 | 289 | 310 | No  |
|     |                                                    |        |                                         | TLTGTAALTVQSQEDNLR     | R | S | 95.00% | 116 |                              |  | 959.5057  | 2 | 7.9 | 34  | 51  | No  |
|     |                                                    |        |                                         | TLTGTAALTVQSQEDNLR     | R | S | 95.00% | 40  |                              |  | 640.0049  | 3 | 5.7 | 34  | 51  | No  |
|     |                                                    |        |                                         | WEDAIPLALK             | K | M | 95.00% | 41  |                              |  | 578.3275  | 2 | 4.8 | 548 | 557 | No  |
|     |                                                    |        | ISOFORM 1 OF DNA-BINDING PROTEIN A.;    |                        |   |   |        |     |                              |  |           |   |     |     |     |     |
|     |                                                    |        | ISOFORM 2 OF DNA-BINDING PROTEIN A.;    |                        |   |   |        |     |                              |  |           |   |     |     |     |     |
|     |                                                    |        | ISOFORM 3 OF DNA-BINDING PROTEIN A.;    |                        |   |   |        |     |                              |  |           |   |     |     |     |     |
|     |                                                    |        | CSDA                                    |                        |   |   |        |     |                              |  |           |   |     |     |     |     |
| 344 | IPI00031801; IPI00219147; IPI00219148; IPI00555698 | CSDA   | ISOFORM 1 OF DNA-BINDING PROTEIN A.;    | AGEAPTNPAPPTQQSSAE     | K | - | 95.00% | 53  |                              |  | 941.4332  | 2 | 6.2 | 285 | 303 | No  |
|     |                                                    |        | ISOFORM 2 OF DNA-BINDING PROTEIN A.;    | GAEANVTGPDGVPEGSR      | K | Y | 95.00% | 105 |                              |  | 891.9388  | 2 | 4.1 | 151 | 169 | No  |
|     |                                                    |        | ISOFORM 3 OF DNA-BINDING PROTEIN A.;    | NAGEIGEMKDGVPEGAQLQGPV | R | N | 95.00% | 54  | M8: Oxidation                |  | 835.7471  | 3 | 4.1 | 191 | 214 | No  |
|     |                                                    |        | CSDA                                    | HR                     | R | N | 95.00% | 54  |                              |  |           |   |     |     |     |     |
|     |                                                    |        |                                         | PAPAVGEAEDKENQQATSGPN  | R | R | 95.00% | 72  |                              |  | 893.0991  | 3 | 0.0 | 232 | 257 | No  |
|     |                                                    |        |                                         | QPSVR                  | R | G | 95.00% | 118 |                              |  | 898.4222  | 2 | 7.0 | 134 | 150 | Yes |
| 345 | IPI00219207                                        | RTN4   | ISOFORM 3 OF RETICULON-4.               | SVGDGETVEFDVVEGEK      | R | G | 95.00% | 118 |                              |  |           |   |     |     |     |     |
|     |                                                    |        |                                         | AYLESEVAISEELVQK       | R | Y | 95.00% | 60  |                              |  | 603.3212  | 3 | 8.4 | 82  | 97  | No  |
|     |                                                    |        |                                         | GVIAIQK                | K | S | 95.00% | 50  |                              |  | 428.7689  | 2 | 4.8 | 66  | 73  | No  |
|     |                                                    |        |                                         | HQAQIDHYLGLANK         | R | N | 95.00% | 116 |                              |  | 804.4237  | 2 | 6.3 | 165 | 178 | No  |
|     |                                                    |        |                                         | HQAQIDHYLGLANK         | R | N | 95.00% | 72  |                              |  | 536.6174  | 3 | 4.3 | 165 | 178 | No  |
|     |                                                    |        |                                         | HQAQIDHYLGLANK         | R | N | 95.00% | 38  |                              |  | 402.7154  | 4 | 5.5 | 165 | 178 | No  |
|     |                                                    |        |                                         | LFLVDDLVDLSK           | R | F | 95.00% | 64  |                              |  | 688.8945  | 2 | 9.6 | 116 | 127 | No  |
|     |                                                    |        |                                         | VVDLLYWR               | K | D | 95.00% | 58  |                              |  | 532.3046  | 2 | 6.9 | 12  | 19  | No  |
| 346 | IPI00219217                                        | LDHB   | L-LACTATE DEHYDROGENASE B CHAIN.        | EKLIAPVAEEEEATVPNNK    | K | I | 95.00% | 100 |                              |  | 976.5281  | 2 | 7.3 | 6   | 23  | No  |
|     |                                                    |        |                                         | FIIPQIVK               | K | Y | 95.00% | 32  |                              |  | 479.3126  | 2 | 3.6 | 120 | 127 | No  |
|     |                                                    |        |                                         | GLTSVINQK              | R | L | 95.00% | 37  |                              |  | 959.5605  | 1 | 8.1 | 300 | 308 | No  |
|     |                                                    |        |                                         | GLTSVINQK              | R | L | 95.00% | 52  |                              |  | 480.2823  | 2 | 4.3 | 300 | 308 | No  |
|     |                                                    |        |                                         | IVADKDYSVTANSK         | K | I | 95.00% | 105 |                              |  | 755.8990  | 2 | 9.8 | 78  | 91  | No  |
|     |                                                    |        |                                         | IVADKDYSVTANSK         | K | I | 95.00% | 41  |                              |  | 504.2657  | 3 | 4.0 | 78  | 91  | No  |
|     |                                                    |        |                                         | IVVVTAGVR              | K | Q | 95.00% | 71  |                              |  | 457.2970  | 2 | 3.1 | 92  | 100 | No  |
|     |                                                    |        |                                         | LIAPVAEEEEATVPNNK      | K | I | 95.00% | 101 |                              |  | 847.9578  | 2 | 6.7 | 8   | 23  | No  |
|     |                                                    |        |                                         | LKDDEVAQLK             | K | K | 95.00% | 44  |                              |  | 579.8262  | 2 | 6.1 | 309 | 318 | No  |
|     |                                                    |        |                                         | LKDDEVAQLKK            | K | S | 95.00% | 28  |                              |  | 643.8713  | 2 | 1.8 | 309 | 319 | No  |
|     |                                                    |        |                                         | LKDDEVAQLKK            | K | S | 95.00% | 58  |                              |  | 429.5841  | 3 | 3.2 | 309 | 319 | No  |
|     |                                                    |        |                                         | MVVEAYEVIK             | K | L | 95.00% | 65  | M1: Oxidation                |  | 642.3356  | 2 | 6.0 | 234 | 244 | No  |
|     |                                                    |        |                                         | MVVEAYEVIK             | K | L | 95.00% | 50  |                              |  | 634.3378  | 2 | 5.5 | 234 | 244 | No  |
|     |                                                    |        |                                         | SADTLWDIQK             | K | D | 95.00% | 57  |                              |  | 588.8020  | 2 | 5.1 | 320 | 329 | No  |
|     |                                                    |        |                                         | SADTLWDIQKDLK          | K | D | 95.00% | 31  |                              |  | 766.9094  | 2 | 9.6 | 320 | 332 | No  |
|     |                                                    |        |                                         | SADTLWDIQKDLKDL        | K | - | 95.00% | 53  |                              |  | 587.6467  | 3 | 9.6 | 320 | 334 | No  |
|     |                                                    |        |                                         | SLADELALVDVLEDK        | K | L | 95.00% | 92  |                              |  | 815.4404  | 2 | 8.6 | 44  | 58  | No  |
|     |                                                    |        |                                         | SLADELALVDVLEDK        | K | L | 95.00% | 55  |                              |  | 543.9612  | 3 | 5.5 | 44  | 58  | No  |
|     |                                                    |        |                                         | SLADELALVDVLEDKLK      | K | G | 95.00% | 53  |                              |  | 936.0292  | 2 | 6.7 | 44  | 60  | No  |
|     |                                                    |        |                                         | SLADELALVDVLEDKLK      | K | G | 95.00% | 41  |                              |  | 624.3565  | 3 | 8.4 | 44  | 60  | No  |
| 347 | IPI00219219                                        | LGALS1 | GALECTIN-1.                             | DGGAWGTEQR             | K | E | 95.00% | 43  |                              |  | 538.7466  | 2 | 8.4 | 65  | 74  | No  |
|     |                                                    |        |                                         | LNLEAINYMAADGDFK       | R | I | 95.00% | 82  | M9: Oxidation                |  | 900.9319  | 2 | 4.5 | 113 | 128 | No  |
|     |                                                    |        |                                         | LNLEAINYMAADGDFK       | R | I | 95.00% | 109 |                              |  | 892.9372  | 2 | 7.6 | 113 | 128 | No  |
|     |                                                    |        |                                         | LPDGYEFK               | K | F | 95.00% | 33  |                              |  | 968.4822  | 1 | 9.5 | 101 | 108 | No  |
|     |                                                    |        |                                         | SFVLNLGK               | K | D | 95.00% | 27  |                              |  | 877.5209  | 1 | 7.0 | 30  | 37  | No  |

|     |                          |        |                                                                                          |                         |   |   |        |     |                |           |   |     |     |     |    |
|-----|--------------------------|--------|------------------------------------------------------------------------------------------|-------------------------|---|---|--------|-----|----------------|-----------|---|-----|-----|-----|----|
|     |                          |        | SARCOPLASMIC RETICULUM HISTIDINE-RICH CALCIUM-BINDING PROTEINPRECURSOR.; 81 KDA PROTEIN. | SFVLNLGK                | K | D | 95.00% | 55  |                | 439.2629  | 2 | 3.7 | 30  | 37  | No |
| 348 | IPI00219226; IPI00796706 | HRC    |                                                                                          | FTIIPNPLDR              | R | R | 95.00% | 48  |                | 593.3394  | 2 | 6.4 | 584 | 593 | No |
|     |                          |        |                                                                                          | HQGHGIEEDEDVSDGHHHR     | R | D | 95.00% | 58  |                | 730.9870  | 3 | 7.0 | 273 | 291 | No |
|     |                          |        |                                                                                          | HQGHGIEEDEDVSDGHHHR     | R | D | 95.00% | 86  |                | 548.4910  | 4 | 4.9 | 273 | 291 | No |
|     |                          |        |                                                                                          | SHEEDDNDDDVSTEYGHQAHR   | R | H | 95.00% | 43  |                | 643.5078  | 4 | 7.3 | 299 | 320 | No |
|     |                          |        |                                                                                          | SHSHQDEDEDEVVSSEHHHHILR | R | H | 95.00% | 35  | S14: Phospho   | 710.5558  | 4 | 6.5 | 157 | 179 | No |
|     |                          |        |                                                                                          | VGDEGVSGEEVFAEHGGQAR    | K | G | 95.00% | 33  | S7: Phospho    | 703.9739  | 3 | 8.6 | 113 | 132 | No |
|     |                          |        |                                                                                          | VGDEGVSGEEVFAEHGGQAR    | K | G | 95.00% | 50  |                | 1015.4710 | 2 | 6.0 | 113 | 132 | No |
|     |                          |        |                                                                                          | VGDEGVSGEEVFAEHGGQAR    | K | G | 95.00% | 73  |                | 677.3148  | 3 | 3.4 | 113 | 132 | No |
|     |                          |        |                                                                                          | VPREDEEVSAELGHQAPSHR    | R | Q | 95.00% | 44  |                | 593.7908  | 4 | 7.0 | 422 | 442 | No |
| 349 | IPI00219381              | NDUFA2 | NADH DEHYDROGENASE [UBIQUINONE] 1 ALPHA SUBCOMPLEX SUBUNIT 2.                            | ALENVLSGK               | R | - | 95.00% | 33  |                | 465.7690  | 2 | 4.4 | 90  | 98  | No |
|     |                          |        |                                                                                          | ANPDLPIILIR             | K | E | 95.00% | 46  |                | 561.3424  | 2 | 7.5 | 47  | 56  | No |
|     |                          |        |                                                                                          | KANPDLPIILIR            | K | E | 95.00% | 36  |                | 417.2615  | 3 | 4.3 | 46  | 56  | No |
| 350 | IPI00219383              | NDUF3  | NADH DEHYDROGENASE [UBIQUINONE] 1 BETA SUBCOMPLEX SUBUNIT 3.                             | IEGTPLETIQK             | K | K | 95.00% | 49  |                | 614.8464  | 2 | 4.8 | 24  | 34  | No |
|     |                          |        |                                                                                          | SVSFSDVFFK              | K | G | 95.00% | 56  |                | 581.7976  | 2 | 7.6 | 60  | 69  | No |
| 351 | IPI00219446; IPI00795288 | PEBP1  | PHOSPHATIDYLETHANOLAMINE-BINDING PROTEIN 1.; 22 KDA PROTEIN.                             | EWHHFLVVMNK             | R | G | 95.00% | 52  | M10: Oxidation | 728.3712  | 2 | 9.6 | 83  | 93  | No |
|     |                          |        |                                                                                          | GNDISSGTVLSDYVSGGPPK    | K | G | 95.00% | 121 |                | 975.4831  | 2 | 6.4 | 94  | 113 | No |
|     |                          |        |                                                                                          | GNDISSGTVLSDYVSGGPPK    | K | G | 95.00% | 50  |                | 650.6580  | 3 | 6.4 | 94  | 113 | No |
|     |                          |        |                                                                                          | LYEQLSGK                | K | - | 95.00% | 46  |                | 937.5069  | 1 | 7.8 | 180 | 187 | No |
|     |                          |        |                                                                                          | LYEQLSGK                | K | - | 95.00% | 55  |                | 469.2559  | 2 | 4.8 | 180 | 187 | No |
|     |                          |        |                                                                                          | LYTLVLTDPDAPSR          | K | K | 95.00% | 100 |                | 780.9206  | 2 | 3.8 | 63  | 76  | No |
|     |                          |        |                                                                                          | LYTLVLTDPDAPSR          | K | K | 95.00% | 42  |                | 520.9518  | 3 | 7.7 | 63  | 76  | No |
|     |                          |        |                                                                                          | LYTLVLTDPDAPSRK         | K | D | 95.00% | 66  |                | 844.9724  | 2 | 8.5 | 63  | 77  | No |
|     |                          |        |                                                                                          | LYTLVLTDPDAPSRK         | K | D | 95.00% | 69  |                | 563.6491  | 3 | 5.3 | 63  | 77  | No |
|     |                          |        |                                                                                          | NRPTSISWDGLDSGK         | K | L | 95.00% | 87  |                | 816.9096  | 2 | 8.0 | 48  | 62  | No |
|     |                          |        |                                                                                          | NRPTSISWDGLDSGK         | K | L | 95.00% | 47  |                | 544.9421  | 3 | 7.5 | 48  | 62  | No |
|     |                          |        |                                                                                          | VLTPQTQVK               | K | N | 95.00% | 27  |                | 443.2765  | 2 | 4.7 | 40  | 47  | No |
|     |                          |        |                                                                                          | WSGPLSLQEVDEQPQHPLHVTY  |   |   |        |     |                |           |   |     |     |     |    |
|     |                          |        |                                                                                          | AGAAVDELGK              | K | V | 95.00% | 43  |                | 1157.9190 | 3 | 6.9 | 8   | 39  | No |
|     |                          |        |                                                                                          | WSGPLSLQEVDEQPQHPLHVTY  |   |   |        |     |                |           |   |     |     |     |    |
|     |                          |        |                                                                                          | AGAAVDELGK              | K | V | 95.00% | 33  |                | 868.6923  | 4 | 7.7 | 8   | 39  | No |
|     |                          |        |                                                                                          | YREWHHFLVVMNK           | K | G | 95.00% | 36  | M12: Oxidation | 592.3035  | 3 | 5.5 | 81  | 93  | No |
|     |                          |        |                                                                                          | YREWHHFLVVMNK           | K | G | 95.00% | 31  | M12: Oxidation | 444.4792  | 4 | 4.7 | 81  | 93  | No |
|     |                          |        |                                                                                          | YVWLVEQDRPLK            | R | C | 95.00% | 66  |                | 854.9640  | 2 | 8.0 | 120 | 132 | No |
|     |                          |        |                                                                                          | YVWLVEQDRPLK            | R | C | 95.00% | 33  |                | 570.3123  | 3 | 8.7 | 120 | 132 | No |
| 352 | IPI00219525; IPI00747533 | PGD    | 6-PHOSPHOGLUCONATE DEHYDROGENASE, DECARBOXYLATING.; 53 KDA PROTEIN.                      | AGQAVDDFIEK             | K | L | 95.00% | 45  |                | 596.7998  | 2 | 5.5 | 77  | 87  | No |
|     |                          |        |                                                                                          | DYFGAHTYELLAK           | R | P | 95.00% | 42  |                | 764.3830  | 2 | 6.4 | 448 | 460 | No |
|     |                          |        |                                                                                          | GILFVSGVSGGEEGAR        | K | Y | 95.00% | 86  |                | 796.4124  | 2 | 5.5 | 120 | 136 | No |
|     |                          |        |                                                                                          | IISYAQGFMLLR            | K | Q | 95.00% | 88  | M9: Oxidation  | 714.3957  | 2 | 8.0 | 332 | 343 | No |
|     |                          |        |                                                                                          | IKDAFDRNPELQNLDDFFK     | K | S | 95.00% | 47  |                | 851.1201  | 3 | 9.7 | 376 | 396 | No |
|     |                          |        |                                                                                          | LVPLLDGTGDIIDGNGSEYR    | K | D | 95.00% | 127 |                | 1080.5710 | 2 | 7.2 | 88  | 107 | No |
|     |                          |        |                                                                                          | VDDFLANEAK              | K | G | 95.00% | 43  |                | 561.2810  | 2 | 5.4 | 39  | 48  | No |
| 353 | IPI00219526              | PGM1   | ISOFORM 1 OF PHOSPHOGLUCOMUTASE-1.                                                       | ADNFEYSDPVDGSISR        | K | N | 95.00% | 117 |                | 886.3980  | 2 | 6.1 | 471 | 486 | No |
|     |                          |        |                                                                                          | ADNFEYSDPVDGSISR        | K | N | 95.00% | 40  |                | 591.2697  | 3 | 9.0 | 471 | 486 | No |
|     |                          |        |                                                                                          | AIGGIILTASHNPGGPNDFGIK  | K | F | 95.00% | 97  |                | 1103.5920 | 2 | 6.4 | 108 | 130 | No |
|     |                          |        |                                                                                          | AIGGIILTASHNPGGPNDFGIK  | K | F | 95.00% | 78  |                | 736.0624  | 3 | 4.2 | 108 | 130 | No |
|     |                          |        |                                                                                          | AIGGIILTASHNPGGPNDFGIK  | K | F | 95.00% | 40  |                | 552.2988  | 4 | 4.2 | 108 | 130 | No |
|     |                          |        |                                                                                          | DLEALMFDR               | K | S | 95.00% | 43  | M6: Oxidation  | 1125.5360 | 1 | 9.2 | 444 | 452 | No |
|     |                          |        |                                                                                          | DLEALMFDR               | K | S | 95.00% | 59  | M6: Oxidation  | 563.2689  | 2 | 4.2 | 444 | 452 | No |
|     |                          |        |                                                                                          | DLEALMFDR               | K | S | 95.00% | 54  |                | 555.2721  | 2 | 5.4 | 444 | 452 | No |
|     |                          |        |                                                                                          | EAIQLIAR                | K | I | 95.00% | 41  |                | 913.5500  | 1 | 3.1 | 69  | 76  | No |
|     |                          |        |                                                                                          | EAIQLIAR                | K | I | 95.00% | 74  |                | 457.2798  | 2 | 4.9 | 69  | 76  | No |
|     |                          |        |                                                                                          | ELLSGPNR                | K | L | 95.00% | 35  |                | 885.4814  | 1 | 2.2 | 210 | 217 | No |
|     |                          |        |                                                                                          | ELLSGPNR                | K | L | 95.00% | 30  |                | 443.2447  | 2 | 2.4 | 210 | 217 | No |
|     |                          |        |                                                                                          | FFGNLMDASK              | K | L | 95.00% | 34  | M6: Oxidation  | 1145.5390 | 1 | 7.6 | 361 | 370 | No |
|     |                          |        |                                                                                          | FFGNLMDASK              | K | L | 95.00% | 68  | M6: Oxidation  | 573.2709  | 2 | 3.4 | 361 | 370 | No |
|     |                          |        |                                                                                          | FFGNLMDASK              | K | L | 95.00% | 44  |                | 565.2741  | 2 | 4.4 | 361 | 370 | No |
|     |                          |        |                                                                                          | FKPFTVEIVDSVEAYATMLR    | K | S | 95.00% | 96  | M18: Oxidation | 1166.6050 | 2 | 5.7 | 181 | 200 | No |
|     |                          |        |                                                                                          | FKPFTVEIVDSVEAYATMLR    | K | S | 95.00% | 52  | M18: Oxidation | 778.0734  | 3 | 6.3 | 181 | 200 | No |
|     |                          |        |                                                                                          | FKPFTVEIVDSVEAYATMLR    | K | S | 95.00% | 48  | M18: Oxidation | 583.8077  | 4 | 7.4 | 181 | 200 | No |
|     |                          |        |                                                                                          | FKPFTVEIVDSVEAYATMLR    | K | S | 95.00% | 54  |                | 772.7440  | 3 | 9.2 | 181 | 200 | No |

|                          |   |   |        |     |                                      |           |   |     |     |     |    |
|--------------------------|---|---|--------|-----|--------------------------------------|-----------|---|-----|-----|-----|----|
| FNISGGPAPEAITDK          | K | I | 95.00% | 131 |                                      | 815.9134  | 2 | 6.9 | 131 | 146 | No |
| FNISGGPAPEAITDKIFQISK    | K | T | 95.00% | 99  |                                      | 1174.1300 | 2 | 9.9 | 131 | 152 | No |
| FNISGGPAPEAITDKIFQISK    | K | T | 95.00% | 50  |                                      | 783.0894  | 3 | 9.7 | 131 | 152 | No |
| HGFFVNPDSVAIVANFISIPYF   |   |   |        |     |                                      |           |   |     |     |     |    |
| QQTGVR                   | K | G | 95.00% | 43  |                                      | 1094.5740 | 3 | 9.8 | 300 | 329 | No |
| IALYETPTGWK              | K | F | 95.00% | 67  |                                      | 639.8436  | 2 | 4.5 | 350 | 360 | No |
| IDAMHGVVGPYVK            | R | K | 95.00% | 63  | M4: Oxidation                        | 701.3654  | 2 | 2.0 | 222 | 234 | No |
| IDAMHGVVGPYVK            | R | K | 95.00% | 54  | M4: Oxidation                        | 467.9129  | 3 | 2.1 | 222 | 234 | No |
| IDAMHGVVGPYVK            | R | K | 95.00% | 51  |                                      | 693.3685  | 2 | 2.8 | 222 | 234 | No |
| IFQISK                   | K | T | 95.00% | 35  |                                      | 735.4427  | 1 | 2.9 | 147 | 152 | No |
| INQDPQVMLAPLISIALK       | K | V | 95.00% | 121 | M8: Oxidation                        | 990.5721  | 2 | 7.9 | 528 | 545 | No |
| INQDPQVMLAPLISIALK       | K | V | 95.00% | 73  | M8: Oxidation                        | 660.7169  | 3 | 7.2 | 528 | 545 | No |
| INQDPQVMLAPLISIALK       | K | V | 95.00% | 87  |                                      | 982.5747  | 2 | 8.0 | 528 | 545 | No |
| INQDPQVMLAPLISIALK       | K | V | 95.00% | 35  |                                      | 655.3855  | 3 | 7.6 | 528 | 545 | No |
| IRIDAMHGVVGPYVK          | K | K | 95.00% | 56  | M6: Oxidation                        | 835.9620  | 2 | 6.5 | 220 | 234 | No |
| IRIDAMHGVVGPYVK          | K | K | 95.00% | 41  | M6: Oxidation                        | 557.6418  | 3 | 2.7 | 220 | 234 | No |
| IRIDAMHGVVGPYVK          | K | K | 95.00% | 40  | M6: Oxidation                        | 418.4824  | 4 | 0.4 | 220 | 234 | No |
| KQSVEDILK                | R | D | 95.00% | 56  |                                      | 530.3091  | 2 | 4.8 | 406 | 414 | No |
| KQSVEDILKDHQWK           | R | Y | 95.00% | 55  |                                      | 877.4737  | 2 | 9.0 | 406 | 419 | No |
| KQSVEDILKDHQWK           | R | Y | 95.00% | 50  |                                      | 585.3159  | 3 | 4.5 | 406 | 419 | No |
| KQSVEDILKDHQWK           | R | Y | 95.00% | 31  |                                      | 439.2382  | 4 | 3.1 | 406 | 419 | No |
| LIFTDGSR                 | R | I | 95.00% | 29  |                                      | 908.4852  | 1 | 1.1 | 492 | 499 | No |
| LIFTDGSR                 | R | I | 95.00% | 58  |                                      | 454.7479  | 2 | 4.2 | 492 | 499 | No |
| LSGTGSAGATIR             | R | L | 95.00% | 105 |                                      | 545.7987  | 2 | 3.5 | 504 | 515 | No |
| LYIDSYEK                 | R | D | 95.00% | 41  |                                      | 1030.5190 | 1 | 9.2 | 516 | 523 | No |
| LYIDSYEK                 | R | D | 95.00% | 35  |                                      | 515.7607  | 2 | 3.7 | 516 | 523 | No |
| LYIDSYEKDVAK             | R | I | 95.00% | 95  |                                      | 722.3742  | 2 | 2.3 | 516 | 527 | No |
|                          |   |   |        |     | M1: Oxidation, M2:<br>Oxidation, M9: |           |   |     |     |     |    |
| MMKDLLEALMFDR            | K | S | 95.00% | 45  | Oxidation, M9:                       | 774.3525  | 2 | 4.0 | 441 | 452 | No |
|                          |   |   |        |     | M1: Oxidation, M2:<br>Oxidation, M9: |           |   |     |     |     |    |
| MMKDLLEALMFDR            | K | S | 95.00% | 35  | Oxidation                            | 516.5728  | 3 | 7.7 | 441 | 452 | No |
| QEATLVVGGDGR             | R | F | 95.00% | 49  |                                      | 1201.6260 | 1 | 6.9 | 53  | 64  | No |
| QEATLVVGGDGR             | R | F | 95.00% | 114 |                                      | 601.3146  | 2 | 2.9 | 53  | 64  | No |
| QFSANDKVYVTEK            | K | A | 95.00% | 70  |                                      | 764.8893  | 2 | 3.9 | 458 | 470 | No |
| QSVEDILK                 | K | D | 95.00% | 43  |                                      | 466.2601  | 2 | 2.4 | 407 | 414 | No |
| SGEHDFGAAFDGGDGR         | K | N | 95.00% | 100 |                                      | 826.8357  | 2 | 3.5 | 278 | 293 | No |
| SGEHDFGAAFDGGDGR         | K | N | 95.00% | 36  |                                      | 551.5610  | 3 | 5.8 | 278 | 293 | No |
| SGEHDFGAAFDGGDRNMILGK    | K | H | 95.00% | 107 | M18: Oxidation                       | 1163.0230 | 2 | 7.6 | 278 | 299 | No |
| SGEHDFGAAFDGGDRNMILGK    | K | H | 95.00% | 46  | M18: Oxidation                       | 775.6808  | 3 | 2.6 | 278 | 299 | No |
| SGEHDFGAAFDGGDRNMILGK    | K | H | 95.00% | 43  | M18: Oxidation                       | 582.0130  | 4 | 3.4 | 278 | 299 | No |
| SIFDFSALK                | R | E | 95.00% | 34  |                                      | 1027.5530 | 1 | 6.5 | 201 | 209 | No |
| SIFDFSALK                | R | E | 95.00% | 76  |                                      | 514.2786  | 2 | 2.7 | 201 | 209 | No |
| SMPTSGALDR               | R | V | 95.00% | 54  | M2: Oxidation                        | 525.7508  | 2 | 4.5 | 334 | 343 | No |
| TIEEYAVCPDLK             | K | V | 95.00% | 45  |                                      | 690.8436  | 2 | 5.1 | 153 | 164 | No |
| TQAYQDQKPGTSGLR          | K | K | 95.00% | 107 |                                      | 825.4191  | 2 | 3.3 | 9   | 23  | No |
| TQAYQDQKPGTSGLR          | K | K | 95.00% | 67  |                                      | 550.6149  | 3 | 2.4 | 9   | 23  | No |
| VDLGVLGK                 | K | Q | 95.00% | 43  |                                      | 800.4899  | 1 | 1.9 | 165 | 172 | No |
| VDLGVLGK                 | K | Q | 95.00% | 62  |                                      | 400.7490  | 2 | 2.2 | 165 | 172 | No |
| VFQSSANYAENFIQSIISTVEPAQ |   |   |        |     |                                      |           |   |     |     |     |    |
| R                        | K | Q | 95.00% | 105 |                                      | 1400.2150 | 2 | 9.9 | 28  | 52  | No |
| VFQSSANYAENFIQSIISTVEPAQ |   |   |        |     |                                      |           |   |     |     |     |    |
| R                        | K | Q | 95.00% | 84  |                                      | 933.8113  | 3 | 8.5 | 28  | 52  | No |
| VFQSSANYAENFIQSIISTVEPAQ |   |   |        |     |                                      |           |   |     |     |     |    |
| R                        | K | Q | 95.00% | 81  |                                      | 700.6094  | 4 | 6.9 | 28  | 52  | No |
| YDYEEVEAEGANK            | R | M | 95.00% | 122 |                                      | 758.8278  | 2 | 2.3 | 428 | 440 | No |
| YDYEEVEAEGANK            | R | M | 95.00% | 40  |                                      | 506.2211  | 3 | 2.2 | 428 | 440 | No |
| YDYEEVEAEGANKMMK         | R | D | 95.00% | 52  | M14: Oxidation,<br>M15: Oxidation    | 969.9148  | 2 | 6.0 | 428 | 443 | No |
| YDYEEVEAEGANKMMK         | R | D | 95.00% | 40  | M14: Oxidation,<br>M15: Oxidation    | 646.9437  | 3 | 2.8 | 428 | 443 | No |

|                      |                                                    |                |                                                                                                                                                                                           |                        |                          |         |                                       |                      |           |   |        |     |          |    |      |     |     |    |
|----------------------|----------------------------------------------------|----------------|-------------------------------------------------------------------------------------------------------------------------------------------------------------------------------------------|------------------------|--------------------------|---------|---------------------------------------|----------------------|-----------|---|--------|-----|----------|----|------|-----|-----|----|
| 354                  | IPI00218371; IPI00219616; IPI00643000; IPI00816572 | PRPS1; PRPS1L1 | RIBOSE-PHOSPHATE PYROPHOSPHOKINASE III.; RIBOSE-PHOSPHATE PYROPHOSPHOKINASE I.; PHOSPHORIBOSYL PYROPHOSPHATE SYNTHETASE 1.; PHOSPHORIBOSYL PYROPHOSPHATE SYNTHETASE 1 VARIANT (FRAGMENT). | IADRLGLELGK            | K                        | V       | 95.00%                                | 25                   | 592.8585  | 2 | 7.3    | 19  | 29       | No |      |     |     |    |
|                      |                                                    |                |                                                                                                                                                                                           | IFSGSSHQDLQK           | K                        | I       | 95.00%                                | 78                   | 717.3597  | 2 | 6.4    | 6   | 18       | No |      |     |     |    |
|                      |                                                    |                |                                                                                                                                                                                           | VYAILTHGIFSGPAISR      | R                        | I       | 95.00%                                | 61                   | 901.4941  | 2 | -9.0   | 244 | 260      | No |      |     |     |    |
| 355                  | IPI00219684                                        | FABP3          | FATTY ACID-BINDING PROTEIN, HEART.                                                                                                                                                        | LGVEFDETTADDR          | K                        | K       | 95.00%                                | 108                  | 734.3379  | 2 | 5.1    | 67  | 79       | No |      |     |     |    |
|                      |                                                    |                |                                                                                                                                                                                           | LGVEFDETTADDRK         | K                        | V       | 95.00%                                | 79                   | 798.3868  | 2 | 6.4    | 67  | 80       | No |      |     |     |    |
|                      |                                                    |                |                                                                                                                                                                                           | LGVEFDETTADDRK         | K                        | V       | 95.00%                                | 53                   | 532.5939  | 3 | 6.7    | 67  | 80       | No |      |     |     |    |
|                      |                                                    |                |                                                                                                                                                                                           | NFDDYMK                | K                        | S       | 95.00%                                | 36                   | 474.6956  | 2 | 6.2    | 16  | 22       | No |      |     |     |    |
|                      |                                                    |                |                                                                                                                                                                                           | NGDILTLK               | K                        | T       | 95.00%                                | 31                   | 873.5120  | 1 | 8.3    | 46  | 53       | No |      |     |     |    |
|                      |                                                    |                |                                                                                                                                                                                           | NGDILTLK               | K                        | T       | 95.00%                                | 65                   | 437.2604  | 2 | 9.6    | 46  | 53       | No |      |     |     |    |
|                      |                                                    |                |                                                                                                                                                                                           | NTEISFK                | K                        | L       | 95.00%                                | 39                   | 838.4368  | 1 | 6.8    | 60  | 66       | No |      |     |     |    |
|                      |                                                    |                |                                                                                                                                                                                           | NTEISFK                | K                        | L       | 95.00%                                | 34                   | 419.7214  | 2 | 4.6    | 60  | 66       | No |      |     |     |    |
|                      |                                                    |                |                                                                                                                                                                                           | QVASMTKPTTIEK          | R                        | N       | 95.00%                                | 61                   | 781.9337  | 2 | 8.4    | 32  | 45       | No |      |     |     |    |
|                      |                                                    |                |                                                                                                                                                                                           | SIVTLDDGK              | K                        | L       | 95.00%                                | 46                   | 889.5073  | 1 | 8.6    | 83  | 91       | No |      |     |     |    |
|                      |                                                    |                |                                                                                                                                                                                           | SIVTLDDGK              | K                        | L       | 95.00%                                | 42                   | 445.2549  | 2 | 2.8    | 83  | 91       | No |      |     |     |    |
|                      |                                                    |                |                                                                                                                                                                                           | SLGVGFATR              | K                        | Q       | 95.00%                                | 65                   | 454.2564  | 2 | 5.4    | 23  | 31       | No |      |     |     |    |
|                      |                                                    |                |                                                                                                                                                                                           | WDGQETTLVR             | K                        | E       | 95.00%                                | 98                   | 602.8043  | 2 | 3.5    | 98  | 107      | No |      |     |     |    |
|                      |                                                    |                |                                                                                                                                                                                           | 356                    | IPI00219685              | NDUFA13 | CELL DEATH-REGULATORY PROTEIN GRIM19. | ENLEEEAIIK           | R         | D | 95.00% | 68  | 667.8353 | 2  | 8.5  | 172 | 182 | No |
|                      |                                                    |                |                                                                                                                                                                                           |                        |                          |         |                                       | IALLPLLQAEARR        | R         | T | 95.00% | 23  | 536.9885 | 3  | 3.6  | 152 | 165 | No |
| LQIEDFEAR            | R                                                  | I              | 95.00%                                                                                                                                                                                    |                        |                          |         |                                       | 58                   | 560.7897  | 2 | 6.6    | 143 | 151      | No |      |     |     |    |
| VGESVFHTTR           | K                                                  | W              | 95.00%                                                                                                                                                                                    |                        |                          |         |                                       | 62                   | 566.7956  | 2 | 7.4    | 189 | 198      | No |      |     |     |    |
| VKQDMPPPGYGPIDYK     | K                                                  | R              | 95.00%                                                                                                                                                                                    |                        |                          |         |                                       | 38                   | 626.6461  | 3 | 6.1    | 89  | 105      | No |      |     |     |    |
| WVPLIGELYGLR         | R                                                  | T              | 95.00%                                                                                                                                                                                    |                        |                          |         |                                       | 47                   | 504.9611  | 3 | 6.2    | 199 | 211      | No |      |     |     |    |
| 357                  | IPI00219729                                        | SLC25A11       | MITOCHONDRIAL 2-OXOGLUTARATE/MALATE CARRIER PROTEIN.                                                                                                                                      |                        |                          |         |                                       | AVVVNAAQLASYSQSK     | R         | Q | 95.00% | 94  | 818.4473 | 2  | 10.0 | 191 | 206 | No |
|                      |                                                    |                |                                                                                                                                                                                           |                        |                          |         |                                       | AVVVNAAQLASYSQSK     | R         | Q | 95.00% | 60  | 545.9653 | 3  | 6.0  | 191 | 206 | No |
|                      |                                                    |                |                                                                                                                                                                                           |                        |                          |         |                                       | EEGVLTLWR            | R         | G | 95.00% | 51  | 551.8040 | 2  | 9.4  | 174 | 182 | No |
|                      |                                                    |                |                                                                                                                                                                                           |                        |                          |         |                                       | GIYTGLSAGLLR         | R         | Q | 95.00% | 85  | 610.8601 | 2  | 9.7  | 79  | 90  | No |
|                      |                                                    |                |                                                                                                                                                                                           | LGITYLFLER             | R                        | L       | 95.00%                                | 85                   | 605.8498  | 2 | 6.7    | 99  | 108      | No |      |     |     |    |
|                      |                                                    |                |                                                                                                                                                                                           | LTGADGTPPGFLLK         | R                        | A       | 95.00%                                | 75                   | 693.8917  | 2 | 8.5    | 109 | 122      | No |      |     |     |    |
|                      |                                                    |                |                                                                                                                                                                                           | NVFNALIR               | K                        | I       | 95.00%                                | 41                   | 473.7819  | 2 | 9.0    | 163 | 170      | No |      |     |     |    |
|                      |                                                    |                |                                                                                                                                                                                           | TSFHALTSILK            | K                        | A       | 95.00%                                | 54                   | 609.3488  | 2 | 0.3    | 63  | 73       | No |      |     |     |    |
|                      |                                                    |                |                                                                                                                                                                                           | TSFHALTSILK            | K                        | A       | 95.00%                                | 32                   | 406.5702  | 3 | 4.5    | 63  | 73       | No |      |     |     |    |
|                      |                                                    |                |                                                                                                                                                                                           | YEGFFSLWK              | R                        | G       | 95.00%                                | 53                   | 588.7941  | 2 | 6.3    | 272 | 280      | No |      |     |     |    |
| 358                  | IPI00219757; IPI00796076; IPI00797321              | GSTP1          | GLUTATHIONE S-TRANSFERASE P.; 23 KDA PROTEIN.; 21 KDA PROTEIN.                                                                                                                            | AFLASPEYVNLPIGNGK      | K                        | -       | 95.00%                                | 33                   | 952.4968  | 2 | -3.2   | 192 | 209      | No |      |     |     |    |
|                      |                                                    |                |                                                                                                                                                                                           | ALPGQLKPFETLLSQNGGK    | K                        | T       | 95.00%                                | 63                   | 1063.5900 | 2 | 5.2    | 122 | 141      | No |      |     |     |    |
|                      |                                                    |                |                                                                                                                                                                                           | ALPGQLKPFETLLSQNGGK    | K                        | T       | 95.00%                                | 37                   | 709.3987  | 3 | 9.0    | 122 | 141      | No |      |     |     |    |
|                      |                                                    |                |                                                                                                                                                                                           | DQQEAAALVDMVNDGVEDLR   | K                        | C       | 95.00%                                | 77                   | 711.6704  | 3 | 8.7    | 83  | 101      | No |      |     |     |    |
|                      |                                                    |                |                                                                                                                                                                                           | DQQEAAALVDMVNDGVEDLR   | K                        | C       | 95.00%                                | 112                  | 1058.9950 | 2 | 0.3    | 83  | 101      | No |      |     |     |    |
|                      |                                                    |                |                                                                                                                                                                                           | FQDGDLTLYQSNITLR       | K                        | H       | 95.00%                                | 143                  | 942.4877  | 2 | 9.1    | 56  | 71       | No |      |     |     |    |
|                      |                                                    |                |                                                                                                                                                                                           | MLLADQQQSWK            | R                        | E       | 95.00%                                | 49                   | 646.8235  | 2 | 6.2    | 20  | 30       | No |      |     |     |    |
|                      |                                                    |                |                                                                                                                                                                                           | PPYTVVYFPVR            | M                        | G       | 95.00%                                | 64                   | 669.3721  | 2 | 7.8    | 2   | 12       | No |      |     |     |    |
|                      |                                                    |                |                                                                                                                                                                                           | AAFDMFDADGGGDISVK      | K                        | E       | 95.00%                                | 128                  | 866.3891  | 2 | 9.6    | 22  | 38       | No |      |     |     |    |
|                      |                                                    |                |                                                                                                                                                                                           | AAFDMFDADGGGDISVK      | K                        | E       | 95.00%                                | 100                  | 858.3898  | 2 | 7.5    | 22  | 38       | No |      |     |     |    |
| 359                  | IPI00219796                                        | TNNC2          | TROPONIN C, SKELETAL MUSCLE.                                                                                                                                                              | ASGEHVTDEEIESLMK       | R                        | D       | 95.00%                                | 90                   | 895.9167  | 2 | 7.6    | 122 | 137      | No |      |     |     |    |
|                      |                                                    |                |                                                                                                                                                                                           | ASGEHVTDEEIESLMK       | R                        | D       | 95.00%                                | 84                   | 887.9206  | 2 | 9.1    | 122 | 137      | No |      |     |     |    |
|                      |                                                    |                |                                                                                                                                                                                           | ASGEHVTDEEIESLMKDGDK   | R                        | N       | 95.00%                                | 51                   | 736.0053  | 3 | 8.1    | 122 | 141      | No |      |     |     |    |
|                      |                                                    |                |                                                                                                                                                                                           | ASGEHVTDEEIESLMKDGDKNN | R                        | N       | 95.00%                                | 51                   | 736.0053  | 3 | 8.1    | 122 | 141      | No |      |     |     |    |
|                      |                                                    |                |                                                                                                                                                                                           | DGR                    | R                        | I       | 95.00%                                | 47                   | 921.4199  | 3 | 9.5    | 122 | 146      | No |      |     |     |    |
|                      |                                                    |                |                                                                                                                                                                                           | DGDKNNDGRIDFDEFLK      | K                        | M       | 95.00%                                | 33                   | 666.6482  | 3 | 4.2    | 138 | 154      | No |      |     |     |    |
|                      |                                                    |                |                                                                                                                                                                                           | ELGTVMR                | K                        | M       | 95.00%                                | 39                   | 411.2155  | 2 | 4.9    | 39  | 45       | No |      |     |     |    |
|                      |                                                    |                |                                                                                                                                                                                           | IDFDEFLK               | R                        | M       | 95.00%                                | 32                   | 1026.5250 | 1 | 9.4    | 147 | 154      | No |      |     |     |    |
|                      |                                                    |                |                                                                                                                                                                                           | IDFDEFLK               | R                        | M       | 95.00%                                | 54                   | 513.7633  | 2 | 3.6    | 147 | 154      | No |      |     |     |    |
|                      |                                                    |                |                                                                                                                                                                                           | NADGYIDPEELAEIFR       | R                        | A       | 95.00%                                | 56                   | 617.9684  | 3 | 7.1    | 106 | 121      | No |      |     |     |    |
|                      |                                                    |                |                                                                                                                                                                                           | NNDGRIDFDEFLK          | K                        | M       | 95.00%                                | 34                   | 791.8866  | 2 | 9.5    | 142 | 154      | No |      |     |     |    |
|                      |                                                    |                |                                                                                                                                                                                           | SYLSEEMIAEFK           | R                        | A       | 95.00%                                | 86                   | 731.8497  | 2 | 9.7    | 10  | 21       | No |      |     |     |    |
|                      |                                                    |                |                                                                                                                                                                                           | SYLSEEMIAEFK           | R                        | A       | 95.00%                                | 30                   | 488.2329  | 3 | 3.8    | 10  | 21       | No |      |     |     |    |
|                      |                                                    |                |                                                                                                                                                                                           | SYLSEEMIAEFK           | R                        | A       | 95.00%                                | 93                   | 723.8522  | 2 | 9.6    | 10  | 21       | No |      |     |     |    |
|                      |                                                    |                |                                                                                                                                                                                           | 360                    | IPI00219910; IPI00783862 | BLVRB   | 23 KDA PROTEIN.; FLAVIN REDUCTASE.    | DSSRLPSEGPRPAHVVDVLQ | R         | T | 95.00% | 27  | 729.3884 | 4  | 9.5  | 41  | 68  | No |
| AADVDK               | R                                                  | T              | 95.00%                                                                                                                                                                                    |                        |                          |         |                                       | 97                   | 823.7807  | 3 | 6.5    | 45  | 68       | No |      |     |     |    |
| LPSEGPRPAHVVDVLQAADV | R                                                  | T              | 95.00%                                                                                                                                                                                    |                        |                          |         |                                       | 97                   | 823.7807  | 3 | 6.5    | 45  | 68       | No |      |     |     |    |
| LPSEGPRPAHVVDVLQAADV | R                                                  | T              | 95.00%                                                                                                                                                                                    |                        |                          |         |                                       | 40                   | 618.0884  | 4 | 8.1    | 45  | 68       | No |      |     |     |    |
|                      |                                                    |                |                                                                                                                                                                                           | LQAVTDDHIR             | R                        | M       | 95.00%                                | 60                   | 584.3146  | 2 | 7.7    | 130 | 139      | No |      |     |     |    |

|     |                                       |        |                                                                                        |   |   |        |     |                               |           |   |      |     |     |    |
|-----|---------------------------------------|--------|----------------------------------------------------------------------------------------|---|---|--------|-----|-------------------------------|-----------|---|------|-----|-----|----|
|     |                                       |        | NDSLPTTMSEGAR                                                                          | R | N | 95.00% | 77  | M9: Oxidation                 | 747.3550  | 2 | 7.7  | 84  | 97  | No |
|     |                                       |        | PAHVVVGDVLQAADVDK                                                                      | R | T | 95.00% | 110 |                               | 866.9727  | 2 | 8.1  | 52  | 68  | No |
|     |                                       |        | PAHVVVGDVLQAADVDK                                                                      | R | T | 95.00% | 68  |                               | 578.3168  | 3 | 6.6  | 52  | 68  | No |
|     |                                       |        | TVAGQDAVIVLLGTR                                                                        | K | N | 95.00% | 116 |                               | 756.9487  | 2 | 9.5  | 69  | 83  | No |
|     |                                       |        | TVAGQDAVIVLLGTR                                                                        | K | N | 95.00% | 48  |                               | 504.9677  | 3 | 8.1  | 69  | 83  | No |
|     |                                       |        | YVAVMPPHIGDQPLTGAYTVLTDGR                                                              | K | G | 95.00% | 62  | M5: Oxidation                 | 896.4605  | 3 | 5.7  | 151 | 175 | No |
|     |                                       |        | UBIQUITIN CARBOXYL-TERMINAL HYDROLASE 14.; UBIQUITIN SPECIFIC PROTEASE 14 ISOFORM B.   |   |   |        |     |                               |           |   |      |     |     |    |
| 361 | IPI00219913; IPI00640357              | USP14  | AQLFALTGVQPAR                                                                          | K | Q | 95.00% | 94  |                               | 686.3954  | 2 | 5.8  | 31  | 43  | No |
|     |                                       |        | ASGEMASAQYITAAALR                                                                      | R | D | 95.00% | 94  | M5: Oxidation                 | 828.4120  | 2 | 6.0  | 142 | 157 | No |
|     |                                       |        | EKFEGVELNTDEPPMVFK                                                                     | K | A | 95.00% | 42  | M15: Oxidation                | 709.0154  | 3 | 6.5  | 13  | 30  | No |
|     |                                       |        | FDDDKVSVITPEDILR                                                                       | K | L | 95.00% | 69  |                               | 931.4885  | 2 | 7.5  | 450 | 465 | No |
|     |                                       |        | FEGVELNTDEPPMVFK                                                                       | K | A | 95.00% | 75  | M13: Oxidation                | 934.4502  | 2 | 7.3  | 15  | 30  | No |
|     |                                       |        | LEAIEDDSVKETDSSSASAATPS                                                                | K | K | 95.00% | 47  |                               | 813.3901  | 3 | 5.2  | 215 | 238 | No |
|     |                                       |        | K                                                                                      |   |   |        |     |                               |           |   |      |     |     |    |
|     |                                       |        | LPAYLTIQMVV                                                                            | R | F | 95.00% | 66  | M9: Oxidation                 | 660.8766  | 2 | 7.8  | 320 | 330 | No |
|     |                                       |        | RVEIMEESEQ                                                                             | R | - | 95.00% | 71  | M5: Oxidation                 | 697.8154  | 2 | 8.6  | 484 | 494 | No |
|     |                                       |        | SLIDQFFGVFEFETTMK                                                                      | K | C | 95.00% | 87  | M15: Oxidation                | 954.4675  | 2 | 8.8  | 241 | 256 | No |
|     |                                       |        | CYTIDYLATE KINASE.; CYTIDYLATE KINASE.; CYTIDYLATE KINASE.                             |   |   |        |     |                               |           |   |      |     |     |    |
| 362 | IPI00219953; IPI00514049; IPI00514929 | CMPK   | FLIDGFPR                                                                               | K | N | 95.00% | 48  |                               | 482.7678  | 2 | 2.2  | 121 | 128 | No |
|     |                                       |        | IQTYLGSTKPIIDLYEEMGK                                                                   | R | V | 95.00% | 47  | M18: Oxidation                | 796.0847  | 3 | 7.0  | 184 | 203 | No |
|     |                                       |        | YGYTHLSAGELLR                                                                          | K | D | 95.00% | 49  |                               | 493.9293  | 3 | 8.5  | 59  | 71  | No |
|     |                                       |        | ISOFORM 2 OF VOLTAGE-DEPENDENT L-TYPE CALCIUM CHANNEL SUBUNIT BETA-1.; 71 KDA PROTEIN. |   |   |        |     |                               |           |   |      |     |     |    |
| 363 | IPI00219983; IPI00796892              | CACNB1 | ALFDFLK                                                                                | K | H | 95.00% | 45  |                               | 427.2473  | 2 | 5.0  | 296 | 302 | No |
|     |                                       |        | ATHPPSSTPPNPLLN                                                                        | K | T | 95.00% | 54  |                               | 849.9549  | 2 | 5.4  | 456 | 471 | No |
|     |                                       |        | GSVVPQEQEHAM                                                                           | R | - | 95.00% | 40  | M12: Oxidation                | 664.3042  | 2 | 4.0  | 512 | 523 | No |
|     |                                       |        | HLNVQIAASEK                                                                            | K | L | 95.00% | 34  |                               | 605.3393  | 2 | 9.6  | 411 | 421 | No |
|     |                                       |        | NLGFVWGLLESSQR                                                                         | R | G | 95.00% | 32  |                               | 725.8615  | 2 | 5.0  | 499 | 511 | No |
|     |                                       |        | SGDNSSSSLGDVVTGTR                                                                      | K | R | 95.00% | 105 |                               | 819.8869  | 2 | 5.4  | 186 | 202 | No |
|     |                                       |        | SSLAEVQSEIER                                                                           | R | I | 95.00% | 85  |                               | 674.3445  | 2 | 4.3  | 342 | 353 | No |
|     |                                       |        | TLQLVALDADTINHPAQLSK                                                                   | R | T | 95.00% | 62  |                               | 716.7330  | 3 | 7.7  | 360 | 379 | No |
|     |                                       |        | TSLAPIIVYIK                                                                            | K | I | 95.00% | 55  |                               | 609.3838  | 2 | 7.2  | 380 | 390 | No |
|     |                                       |        | TSVSSVTTPPPHGK                                                                         | K | R | 95.00% | 51  |                               | 697.8724  | 2 | 6.3  | 241 | 254 | No |
|     |                                       |        | TSVSSVTTPPPHGK                                                                         | K | R | 95.00% | 35  |                               | 465.5843  | 3 | 6.6  | 241 | 254 | No |
|     |                                       |        | NADH DEHYDROGENASE [UBIQUINONE] IRON-SULFUR PROTEIN 5.                                 |   |   |        |     |                               |           |   |      |     |     |    |
| 364 | IPI00220063                           | NDUFSS | FGLNIDR                                                                                | R | W | 95.00% | 57  |                               | 417.7287  | 2 | 2.6  | 10  | 16  | No |
|     |                                       |        | PFLDIQK                                                                                | M | R | 95.00% | 46  |                               | 430.7513  | 2 | 7.5  | 2   | 8   | No |
|     |                                       |        | WLTIQSGEQPYK                                                                           | R | M | 95.00% | 47  |                               | 725.3766  | 2 | 5.2  | 17  | 28  | No |
| 365 | IPI00220301                           | PRDX6  | DGDSVMVLPPIPEEEAK                                                                      | K | K | 95.00% | 55  | M6: Oxidation                 | 923.4521  | 2 | 9.1  | 183 | 199 | No |
|     |                                       |        | DGDSVMVLPPIPEEEAK                                                                      | K | K | 95.00% | 49  |                               | 915.4534  | 2 | 7.8  | 183 | 199 | No |
|     |                                       |        | DGDSVMVLPPIPEEEAKK                                                                     | K | L | 95.00% | 39  | M6: Oxidation                 | 987.5001  | 2 | 9.1  | 183 | 200 | No |
|     |                                       |        | DGDSVMVLPPIPEEEAKK                                                                     | K | L | 95.00% | 47  | M6: Oxidation                 | 658.6681  | 3 | 7.3  | 183 | 200 | No |
|     |                                       |        | ELAILLGMLDPAEKDEK                                                                      | R | G | 95.00% | 32  | M8: Oxidation                 | 950.9999  | 2 | -1.3 | 109 | 125 | No |
|     |                                       |        | ELAILLGMLDPAEKDEK                                                                      | R | G | 95.00% | 41  | M8: Oxidation                 | 634.3420  | 3 | 8.3  | 109 | 125 | No |
|     |                                       |        | ELAILLGMLDPAEKDEK                                                                      | R | G | 95.00% | 74  |                               | 943.0109  | 2 | 7.5  | 109 | 125 | No |
|     |                                       |        | ELAILLGMLDPAEKDEK                                                                      | R | G | 95.00% | 40  |                               | 629.0078  | 3 | 4.3  | 109 | 125 | No |
|     |                                       |        | FHDFLGDSWGILFSPR                                                                       | R | D | 95.00% | 62  |                               | 677.6729  | 3 | 7.6  | 25  | 41  | No |
|     |                                       |        | FHDFLGDSWGILFSPR                                                                       | R | D | 95.00% | 36  |                               | 508.5059  | 4 | 6.0  | 25  | 41  | No |
|     |                                       |        | LIALSIDSVEDHLAWSK                                                                      | K | D | 95.00% | 101 |                               | 949.0168  | 2 | 9.7  | 68  | 84  | No |
|     |                                       |        | LIALSIDSVEDHLAWSK                                                                      | K | D | 95.00% | 31  |                               | 633.0117  | 3 | 6.4  | 68  | 84  | No |
|     |                                       |        | LPFFIIDR                                                                               | K | N | 95.00% | 67  |                               | 543.3088  | 2 | 9.2  | 98  | 106 | No |
|     |                                       |        | LSILYPATTGR                                                                            | K | N | 95.00% | 64  |                               | 596.3445  | 2 | 6.0  | 145 | 155 | No |
|     |                                       |        | NFDEILR                                                                                | R | V | 95.00% | 34  |                               | 906.4758  | 1 | 8.0  | 156 | 162 | No |
|     |                                       |        | NFDEILR                                                                                | R | V | 95.00% | 45  |                               | 453.7406  | 2 | 5.3  | 156 | 162 | No |
|     |                                       |        | PGGLLLDVAPNFEANTTVGR                                                                   | M | I | 95.00% | 113 |                               | 1049.5590 | 2 | 7.4  | 2   | 22  | No |
|     |                                       |        | PGGLLLDVAPNFEANTTVGR                                                                   | M | I | 95.00% | 92  |                               | 700.0413  | 3 | 7.1  | 2   | 22  | No |
|     |                                       |        | VVVFVGPDK                                                                              | R | K | 95.00% | 35  |                               | 504.2858  | 2 | 7.1  | 133 | 141 | No |
|     |                                       |        | VVVFVGPDKK                                                                             | R | L | 95.00% | 68  |                               | 568.3344  | 2 | 8.3  | 133 | 142 | No |
|     |                                       |        | VVISLQLTAEK                                                                            | R | R | 95.00% | 88  |                               | 600.8694  | 2 | 8.7  | 163 | 173 | No |
|     |                                       |        | VVISLQLTAEKR                                                                           | R | V | 95.00% | 57  |                               | 678.9205  | 2 | 8.5  | 163 | 174 | No |
|     |                                       |        | VVISLQLTAEKR                                                                           | R | V | 95.00% | 33  |                               | 452.9492  | 3 | 7.7  | 163 | 174 | No |
|     |                                       |        | NG,NG-DIMETHYLARGININE DIMETHYLAMINOHYDROLASE 1.                                       |   |   |        |     |                               |           |   |      |     |     |    |
| 366 | IPI00220342                           | DDAH1  | GAEILADTFK                                                                             | R | D | 95.00% | 57  |                               | 1064.5700 | 1 | 6.0  | 150 | 159 | No |
|     |                                       |        | GAEILADTFK                                                                             | R | D | 95.00% | 69  |                               | 532.7877  | 2 | 4.2  | 150 | 159 | No |
|     |                                       |        | GAEILADTFKDYAVSTVPVADGLHLK                                                             | R | S | 95.00% | 33  |                               | 910.8245  | 3 | 8.1  | 150 | 175 | No |
|     |                                       |        | LKDHLIPVSMSELEK                                                                        | K | V | 95.00% | 38  | M5: Oxidation, M11: Oxidation | 634.6659  | 3 | 5.5  | 252 | 267 | No |

|                    |                                       |       |                                                                                                                                                |                         |                                                    |          |                                                                                                            |                         |               |          |        |     |                |          |     |     |      |      |    |  |  |  |  |  |  |  |  |  |  |  |
|--------------------|---------------------------------------|-------|------------------------------------------------------------------------------------------------------------------------------------------------|-------------------------|----------------------------------------------------|----------|------------------------------------------------------------------------------------------------------------|-------------------------|---------------|----------|--------|-----|----------------|----------|-----|-----|------|------|----|--|--|--|--|--|--|--|--|--|--|--|
| 367                | IPI00220362                           | HSPE1 | 10 KDA HEAT SHOCK PROTEIN, MITOCHONDRIAL.                                                                                                      | LQLNIVEMKDENATLDGGDVLFT |                                                    |          |                                                                                                            |                         |               |          |        |     |                |          |     |     |      |      |    |  |  |  |  |  |  |  |  |  |  |  |
|                    |                                       |       |                                                                                                                                                | GR                      | K                                                  | E        | 95.00%                                                                                                     | 49                      | M8: Oxidation | 922.1406 | 3      | 8.5 | 112            | 136      | No  |     |      |      |    |  |  |  |  |  |  |  |  |  |  |  |
|                    |                                       |       |                                                                                                                                                | TPEEYPESAK              | R                                                  | V        | 95.00%                                                                                                     | 41                      |               | 575.7707 | 2      | 5.7 | 238            | 247      | No  |     |      |      |    |  |  |  |  |  |  |  |  |  |  |  |
|                    |                                       |       |                                                                                                                                                | FLPLFDR                 | K                                                  | V        | 95.00%                                                                                                     | 28                      |               | 454.2590 | 2      | 6.7 | 9              | 15       | No  |     |      |      |    |  |  |  |  |  |  |  |  |  |  |  |
|                    |                                       |       |                                                                                                                                                | GGEIQPVSVK              | K                                                  | V        | 95.00%                                                                                                     | 53                      |               | 507.2880 | 2      | 4.9 | 57             | 66       | No  |     |      |      |    |  |  |  |  |  |  |  |  |  |  |  |
|                    |                                       |       |                                                                                                                                                | GGIMLPEK                | K                                                  | S        | 95.00%                                                                                                     | 38                      | M4: Oxidation | 430.7328 | 2      | 2.7 | 29             | 36       | No  |     |      |      |    |  |  |  |  |  |  |  |  |  |  |  |
|                    |                                       |       |                                                                                                                                                | KFLPLFDR                | R                                                  | V        | 95.00%                                                                                                     | 39                      |               | 518.3067 | 2      | 6.0 | 8              | 15       | No  |     |      |      |    |  |  |  |  |  |  |  |  |  |  |  |
|                    |                                       |       |                                                                                                                                                | VLQATVVAVGSGSK          | K                                                  | G        | 95.00%                                                                                                     | 62                      |               | 658.3895 | 2      | 9.6 | 41             | 54       | No  |     |      |      |    |  |  |  |  |  |  |  |  |  |  |  |
|                    |                                       |       |                                                                                                                                                | VVLDKDYFLFR             | K                                                  | D        | 95.00%                                                                                                     | 38                      |               | 765.4092 | 2      | 6.6 | 81             | 92       | No  |     |      |      |    |  |  |  |  |  |  |  |  |  |  |  |
|                    |                                       |       |                                                                                                                                                | VVLDKDYFLFR             | K                                                  | D        | 95.00%                                                                                                     | 58                      |               | 510.6102 | 3      | 9.5 | 81             | 92       | No  |     |      |      |    |  |  |  |  |  |  |  |  |  |  |  |
|                    |                                       |       |                                                                                                                                                | AFIPQLLR                | K                                                  | L        | 95.00%                                                                                                     | 28                      |               | 522.8176 | 2      | 6.4 | 714            | 722      | No  |     |      |      |    |  |  |  |  |  |  |  |  |  |  |  |
|                    |                                       |       |                                                                                                                                                | 368                     | IPI00220373                                        | IDE      | INSULIN-DEGRADING ENZYME.                                                                                  | EMLAVDAPR               | K             | R        | 95.00% | 29  | M2: Oxidation  | 509.2597 | 2   | 7.4 | 942  | 950  | No |  |  |  |  |  |  |  |  |  |  |  |
| NLYVTFPIPLQK       | R                                     | Y     | 95.00%                                                                                                                                         |                         |                                                    |          |                                                                                                            | 45                      |               | 774.4344 | 2      | 8.7 | 312            | 324      | No  |     |      |      |    |  |  |  |  |  |  |  |  |  |  |  |
| VEAFITMEK          | R                                     | S     | 95.00%                                                                                                                                         |                         |                                                    |          |                                                                                                            | 35                      | M8: Oxidation | 598.8185 | 2      | 4.6 | 863            | 872      | No  |     |      |      |    |  |  |  |  |  |  |  |  |  |  |  |
| 369                | IPI00220391; IPI00220558; IPI00783826 | RYP1  | 565 KDA PROTEIN.; ISOFORM 2 OF RYANODINE RECEPTOR 1.; ISOFORM 1 OF RYANODINE RECEPTOR 1.                                                       |                         |                                                    |          |                                                                                                            | AEGLGMVNEGDVTINR        | K             | Q        | 95.00% | 84  | M6: Oxidation  | 845.9133 | 2   | 6.9 | 3849 | 3864 | No |  |  |  |  |  |  |  |  |  |  |  |
|                    |                                       |       |                                                                                                                                                |                         |                                                    |          |                                                                                                            | ARPELLQSHFIPTIGR        | R             | L        | 95.00% | 30  |                | 612.3536 | 3   | 8.5 | 3351 | 3366 | No |  |  |  |  |  |  |  |  |  |  |  |
|                    |                                       |       |                                                                                                                                                |                         |                                                    |          |                                                                                                            | ATVDAEGNFDRPVPETLNVIIPE |               |          |        |     |                |          |     |     |      |      |    |  |  |  |  |  |  |  |  |  |  |  |
|                    |                                       |       |                                                                                                                                                |                         |                                                    |          |                                                                                                            | K                       | K             | L        | 95.00% | 39  |                | 875.4648 | 3   | 8.3 | 2727 | 2750 | No |  |  |  |  |  |  |  |  |  |  |  |
|                    |                                       |       |                                                                                                                                                |                         |                                                    |          |                                                                                                            | EGAPGGTPQAGGEAQPAR      | K             | A        | 95.00% | 40  |                | 825.9006 | 2   | 5.8 | 1354 | 1371 | No |  |  |  |  |  |  |  |  |  |  |  |
|                    |                                       |       |                                                                                                                                                |                         |                                                    |          |                                                                                                            | IQNNWSYGENIDEELK        | K             | T        | 95.00% | 59  |                | 976.4620 | 2   | 6.4 | 2771 | 2786 | No |  |  |  |  |  |  |  |  |  |  |  |
|                    |                                       |       |                                                                                                                                                |                         |                                                    |          |                                                                                                            | LAQDSSQIELLK            | K             | E        | 95.00% | 37  |                | 672.8779 | 2   | 7.6 | 3999 | 4010 | No |  |  |  |  |  |  |  |  |  |  |  |
|                    |                                       |       |                                                                                                                                                |                         |                                                    |          |                                                                                                            | LTPAQTTLVDR             | R             | L        | 95.00% | 28  |                | 607.8452 | 2   | 6.3 | 976  | 986  | No |  |  |  |  |  |  |  |  |  |  |  |
|                    |                                       |       |                                                                                                                                                |                         |                                                    |          |                                                                                                            | NYNLQMSGETLK            | R             | T        | 95.00% | 42  | M6: Oxidation  | 707.3438 | 2   | 8.0 | 918  | 929  | No |  |  |  |  |  |  |  |  |  |  |  |
|                    |                                       |       |                                                                                                                                                | FFESASEDIEK             | R                                                  | M        | 95.00%                                                                                                     | 58                      |               | 694.8199 | 2      | 7.0 | 3096           | 3107     | No  |     |      |      |    |  |  |  |  |  |  |  |  |  |  |  |
|                    |                                       |       |                                                                                                                                                | VESLAAFAER              | R                                                  | Y        | 95.00%                                                                                                     | 46                      |               | 546.7914 | 2      | 5.6 | 1955           | 1964     | No  |     |      |      |    |  |  |  |  |  |  |  |  |  |  |  |
|                    |                                       |       |                                                                                                                                                | 370                     | IPI00220416; IPI00643836; IPI00790644; IPI00798386 | UQCRB    | UBIQUINOL-CYTOCHROME C REDUCTASE COMPLEX 14 KDA PROTEIN.; UQCRB PROTEIN.; 16 KDA PROTEIN.; 12 KDA PROTEIN. | VVTVTMGDEQGNVHSSLK      | R             | C        | 95.00% | 74  | M6: Oxidation  | 958.9800 | 2   | 7.1 | 1470 | 1487 | No |  |  |  |  |  |  |  |  |  |  |  |
| VVTVTMGDEQGNVHSSLK | R                                     | C     | 95.00%                                                                                                                                         |                         |                                                    |          |                                                                                                            | 32                      | M6: Oxidation | 639.6538 | 3      | 3.7 | 1470           | 1487     | No  |     |      |      |    |  |  |  |  |  |  |  |  |  |  |  |
| DDTIYEDEDVKEAIR    | R                                     | R     | 95.00%                                                                                                                                         |                         |                                                    |          |                                                                                                            | 82                      |               | 905.9257 | 2      | 4.7 | 35             | 49       | No  |     |      |      |    |  |  |  |  |  |  |  |  |  |  |  |
| DDTIYEDEDVKEAIR    | R                                     | R     | 95.00%                                                                                                                                         |                         |                                                    |          |                                                                                                            | 41                      |               | 604.2870 | 3      | 5.7 | 35             | 49       | No  |     |      |      |    |  |  |  |  |  |  |  |  |  |  |  |
| LPEINLYNDR         | R                                     | M     | 95.00%                                                                                                                                         |                         |                                                    |          |                                                                                                            | 60                      |               | 567.2874 | 2      | 6.9 | 51             | 59       | No  |     |      |      |    |  |  |  |  |  |  |  |  |  |  |  |
| RLPENLYNDR         | R                                     | M     | 95.00%                                                                                                                                         |                         |                                                    |          |                                                                                                            | 51                      |               | 645.3364 | 2      | 3.6 | 50             | 59       | No  |     |      |      |    |  |  |  |  |  |  |  |  |  |  |  |
| WYVYNAAGFNK        | K                                     | L     | 95.00%                                                                                                                                         |                         |                                                    |          |                                                                                                            | 39                      |               | 617.2911 | 2      | 4.3 | 20             | 29       | No  |     |      |      |    |  |  |  |  |  |  |  |  |  |  |  |
| 371                | IPI00220467; IPI00395442; IPI00643758 | TNNT1 | ISOFORM 2 OF TROPONIN T, SLOW SKELETAL MUSCLE.; ISOFORM 1 OF TROPONIN T, SLOW SKELETAL MUSCLE.; ISOFORM 3 OF TROPONIN T, SLOW SKELETAL MUSCLE. |                         |                                                    |          |                                                                                                            | AQELSDWIHQLESEK         | K             | F        | 95.00% | 106 |                | 906.9481 | 2   | 6.3 | 196  | 210  | No |  |  |  |  |  |  |  |  |  |  |  |
|                    |                                       |       |                                                                                                                                                |                         |                                                    |          |                                                                                                            | AQELSDWIHQLESEK         | K             | F        | 95.00% | 39  |                | 604.9668 | 3   | 4.3 | 196  | 210  | No |  |  |  |  |  |  |  |  |  |  |  |
|                    |                                       |       |                                                                                                                                                |                         |                                                    |          |                                                                                                            | AQELSDWIHQLESEKFDLMAK   | K             | L        | 95.00% | 56  | M19: Oxidation | 845.4214 | 3   | 9.9 | 196  | 216  | No |  |  |  |  |  |  |  |  |  |  |  |
|                    |                                       |       |                                                                                                                                                |                         |                                                    |          |                                                                                                            | AQELSDWIHQLESEKFDLMAK   | K             | L        | 95.00% | 40  |                | 840.0853 | 3   | 4.6 | 196  | 216  | No |  |  |  |  |  |  |  |  |  |  |  |
|                    |                                       |       |                                                                                                                                                |                         |                                                    |          |                                                                                                            | IPEGERVDFDDIHR          | K             | K        | 95.00% | 57  |                | 849.4216 | 2   | 6.1 | 44   | 57   | No |  |  |  |  |  |  |  |  |  |  |  |
|                    |                                       |       |                                                                                                                                                | IPEGERVDFDDIHR          | K                                                  | K        | 95.00%                                                                                                     | 43                      |               | 566.6187 | 3      | 9.0 | 44             | 57       | No  |     |      |      |    |  |  |  |  |  |  |  |  |  |  |  |
|                    |                                       |       |                                                                                                                                                | IPEGERVDFDDIHR          | K                                                  | K        | 95.00%                                                                                                     | 34                      |               | 425.2154 | 4      | 7.6 | 44             | 57       | No  |     |      |      |    |  |  |  |  |  |  |  |  |  |  |  |
|                    |                                       |       |                                                                                                                                                | KKEEEELVALK             | K                                                  | E        | 95.00%                                                                                                     | 56                      |               | 594.3326 | 2      | 4.1 | 80             | 89       | Yes |     |      |      |    |  |  |  |  |  |  |  |  |  |  |  |
|                    |                                       |       |                                                                                                                                                | KKEEEELVALK             | R                                                  | E        | 95.00%                                                                                                     | 79                      |               | 658.3810 | 2      | 5.0 | 79             | 89       | Yes |     |      |      |    |  |  |  |  |  |  |  |  |  |  |  |
|                    |                                       |       |                                                                                                                                                | KKEEEELVALK             | R                                                  | E        | 95.00%                                                                                                     | 51                      |               | 439.2556 | 3      | 2.7 | 79             | 89       | Yes |     |      |      |    |  |  |  |  |  |  |  |  |  |  |  |
|                    |                                       |       |                                                                                                                                                | KKPLDIDYMGEEQLR         | R                                                  | E        | 95.00%                                                                                                     | 68                      | M9: Oxidation | 925.9748 | 2      | 5.1 | 179            | 193      | No  |     |      |      |    |  |  |  |  |  |  |  |  |  |  |  |
|                    |                                       |       |                                                                                                                                                | KKPLDIDYMGEEQLR         | R                                                  | E        | 95.00%                                                                                                     | 66                      | M9: Oxidation | 617.6523 | 3      | 4.7 | 179            | 193      | No  |     |      |      |    |  |  |  |  |  |  |  |  |  |  |  |
| KKPLDIDYMGEEQLR    | R                                     | E     | 95.00%                                                                                                                                         | 35                      |                                                    | 612.3204 | 3                                                                                                          | 4.4                     | 179           | 193      | No     |     |                |          |     |     |      |      |    |  |  |  |  |  |  |  |  |  |  |  |
| KKPLDIDYMGEEQLR    | K                                     | E     | 95.00%                                                                                                                                         | 60                      | M8: Oxidation                                      | 861.9279 | 2                                                                                                          | 6.0                     | 180           | 193      | No     |     |                |          |     |     |      |      |    |  |  |  |  |  |  |  |  |  |  |  |
| KVLSNMGAHFGGYLVK   | K                                     | A     | 95.00%                                                                                                                                         | 43                      | M6: Oxidation                                      | 868.9582 | 2                                                                                                          | -4.1                    | 152           | 167      | No     |     |                |          |     |     |      |      |    |  |  |  |  |  |  |  |  |  |  |  |
| PSRPVVPPLIPP       | K                                     | I     | 95.00%                                                                                                                                         | 23                      |                                                    | 698.9415 | 2                                                                                                          | 4.9                     | 31            | 43       | No     |     |                |          |     |     |      |      |    |  |  |  |  |  |  |  |  |  |  |  |
| PSRPVVPPLIPP       | K                                     | I     | 95.00%                                                                                                                                         | 59                      |                                                    | 466.2959 | 3                                                                                                          | 2.7                     | 31            | 43       | No     |     |                |          |     |     |      |      |    |  |  |  |  |  |  |  |  |  |  |  |
| PVVPPLIPP          | R                                     | I     | 95.00%                                                                                                                                         | 42                      |                                                    | 528.8480 | 2                                                                                                          | 5.5                     | 34            | 43       | No     |     |                |          |     |     |      |      |    |  |  |  |  |  |  |  |  |  |  |  |
| VDFDDIHR           | R                                     | K     | 95.00%                                                                                                                                         | 46                      |                                                    | 508.7466 | 2                                                                                                          | 5.0                     | 50            | 57       | No     |     |                |          |     |     |      |      |    |  |  |  |  |  |  |  |  |  |  |  |
| VLSNMGAHFGGYLVK    | K                                     | A     | 95.00%                                                                                                                                         | 88                      | M5: Oxidation                                      | 804.9194 | 2                                                                                                          | 6.3                     | 142           | 156      | No     |     |                |          |     |     |      |      |    |  |  |  |  |  |  |  |  |  |  |  |
| VLSNMGAHFGGYLVK    | K                                     | A     | 95.00%                                                                                                                                         | 37                      | M5: Oxidation                                      | 536.9490 | 3                                                                                                          | 6.5                     | 153           | 167      | No     |     |                |          |     |     |      |      |    |  |  |  |  |  |  |  |  |  |  |  |
| VLSNMGAHFGGYLVK    | K                                     | A     | 95.00%                                                                                                                                         | 99                      |                                                    | 796.9215 | 2                                                                                                          | 5.8                     | 142           | 156      | No     |     |                |          |     |     |      |      |    |  |  |  |  |  |  |  |  |  |  |  |
| VLSNMGAHFGGYLVK    | K                                     | A     | 95.00%                                                                                                                                         | 36                      |                                                    | 531.6166 | 3                                                                                                          | 5.1                     | 142           | 156      | No     |     |                |          |     |     |      |      |    |  |  |  |  |  |  |  |  |  |  |  |
| YEINLVYNR          | K                                     | I     | 95.00%                                                                                                                                         | 67                      |                                                    | 592.3130 | 2                                                                                                          | 5.9                     | 222           | 230      | No     |     |                |          |     |     |      |      |    |  |  |  |  |  |  |  |  |  |  |  |
| 372                | IPI00220487                           | ATP5H | ISOFORM 1 OF ATP SYNTHASE D CHAIN, MITOCHONDRIAL.                                                                                              | AGLVDDFEK               | K                                                  | K        | 95.00%                                                                                                     | 32                      |               | 497.2506 | 2      | 3.9 | 64             | 72       | No  |     |      |      |    |  |  |  |  |  |  |  |  |  |  |  |
|                    |                                       |       |                                                                                                                                                | AGLVDDFEKK              | K                                                  | F        | 95.00%                                                                                                     | 58                      |               | 561.3013 | 2      | 9.1 | 64             | 73       | No  |     |      |      |    |  |  |  |  |  |  |  |  |  |  |  |
|                    |                                       |       |                                                                                                                                                | IVEYEKEME               | R                                                  | M        | 95.00%                                                                                                     | 53                      | M8: Oxidation | 657.3216 | 2      | 4.1 | 112            | 121      | No  |     |      |      |    |  |  |  |  |  |  |  |  |  |  |  |
|                    |                                       |       |                                                                                                                                                | LAALPENPPAIDWAYYK       | R                                                  | A        | 95.00%                                                                                                     | 51                      |               | 644.6743 | 3      | 8.4 | 42             | 58       | No  |     |      |      |    |  |  |  |  |  |  |  |  |  |  |  |

|     |             |       |                                                  |                           |   |   |        |     |                                                                        |           |   |      |     |     |     |
|-----|-------------|-------|--------------------------------------------------|---------------------------|---|---|--------|-----|------------------------------------------------------------------------|-----------|---|------|-----|-----|-----|
|     |             |       |                                                  | SWNETLTSR                 | K | L | 95.00% | 63  |                                                                        | 547.2713  | 2 | 6.4  | 33  | 41  | No  |
|     |             |       |                                                  | TIDWVFAEIIIPQNK           | K | A | 95.00% | 38  |                                                                        | 625.0043  | 3 | 5.9  | 10  | 25  | No  |
|     |             |       |                                                  | VPVPEDKYTAQVDAEEK         | K | E | 95.00% | 51  |                                                                        | 639.9893  | 3 | 3.9  | 79  | 95  | No  |
|     |             |       |                                                  | VPVPEDKYTAQVDAEEKEDVK     | K | S | 95.00% | 38  |                                                                        | 797.0718  | 3 | 9.3  | 79  | 99  | No  |
|     |             |       |                                                  | YTAQVDAEEKEDVK            | K | S | 95.00% | 54  |                                                                        | 812.8966  | 2 | 9.0  | 86  | 99  | No  |
| 373 | IPI00220642 | YWHAG | 14-3-3 PROTEIN GAMMA.                            | YTAQVDAEEKEDVK            | K | S | 95.00% | 30  |                                                                        | 542.2657  | 3 | 6.5  | 86  | 99  | No  |
|     |             |       |                                                  | DSTLIMQLLR                | K | D | 95.00% | 65  |                                                                        | 603.3372  | 2 | 8.2  | 218 | 227 | Yes |
|     |             |       |                                                  | LAEQAERYDDMAAAMK          | R | N | 95.00% | 37  | M6: Oxidation,<br>M11: Oxidation,<br>M15: Oxidation                    | 615.6140  | 3 | 5.6  | 13  | 28  | No  |
|     |             |       |                                                  | NLLSVAYK                  | R | N | 95.00% | 33  |                                                                        | 907.5325  | 1 | 7.9  | 43  | 50  | Yes |
|     |             |       |                                                  | NLLSVAYK                  | R | N | 95.00% | 39  |                                                                        | 454.2683  | 2 | 3.9  | 43  | 50  | Yes |
|     |             |       |                                                  | NVTELNEPLSNEER            | K | N | 95.00% | 102 |                                                                        | 822.4043  | 2 | 7.9  | 29  | 42  | No  |
|     |             |       |                                                  | NVTELNEPLSNEER            | K | N | 95.00% | 35  |                                                                        | 548.6033  | 3 | 3.9  | 29  | 42  | No  |
|     |             |       |                                                  | TAFDDAIAELDTLNEDSYK       | K | D | 95.00% | 75  |                                                                        | 711.0029  | 3 | 9.9  | 199 | 217 | No  |
|     |             |       |                                                  | YDDMAAAMK                 | R | N | 95.00% | 49  | M4: Oxidation, M8:<br>Oxidation                                        | 524.2131  | 2 | 5.2  | 20  | 28  | No  |
|     |             |       |                                                  | YLAEVATGEK                | R | R | 95.00% | 52  |                                                                        | 1080.5660 | 1 | 7.3  | 133 | 142 | No  |
|     |             |       |                                                  | YLAEVATGEK                | R | R | 95.00% | 53  |                                                                        | 540.7853  | 2 | 4.6  | 133 | 142 | No  |
|     |             |       |                                                  | YLAEVATGEKR               | R | A | 95.00% | 37  |                                                                        | 618.8387  | 2 | 8.6  | 133 | 143 | No  |
| 374 | IPI00220644 | PKM2  | ISOFORM M1 OF PYRUVATE KINASE ISOZYMES<br>M1/M2. | APIIAVTR                  | R | N | 95.00% | 35  |                                                                        | 840.5320  | 1 | 1.4  | 448 | 455 | Yes |
|     |             |       |                                                  | APIIAVTR                  | R | N | 95.00% | 62  |                                                                        | 420.7706  | 2 | 3.1  | 448 | 455 | Yes |
|     |             |       |                                                  | ASSHSTDLMAMAMGSVEASYK     | R | C | 95.00% | 59  | M12: Oxidation,<br>M14: Oxidation                                      | 779.0074  | 3 | 7.5  | 401 | 422 | No  |
|     |             |       |                                                  | ASSHSTDLMAMAMGSVEASYK     | R | C | 95.00% | 42  | M14: Oxidation                                                         | 773.6760  | 3 | 7.9  | 401 | 422 | No  |
|     |             |       |                                                  | ASSHSTDLMAMAMGSVEASYK     | R | C | 95.00% | 62  | M9: Oxidation,<br>M12: Oxidation                                       | 779.0058  | 3 | 5.4  | 401 | 422 | No  |
|     |             |       |                                                  | ASSHSTDLMAMAMGSVEASYK     | R | C | 95.00% | 103 | M9: Oxidation,<br>M12: Oxidation                                       | 1176.0080 | 2 | 10.0 | 401 | 422 | No  |
|     |             |       |                                                  | ASSHSTDLMAMAMGSVEASYK     | R | C | 95.00% | 80  | M9: Oxidation,<br>M12: Oxidation                                       | 784.3365  | 3 | 4.3  | 401 | 422 | No  |
|     |             |       |                                                  | ASSHSTDLMAMAMGSVEASYK     | R | C | 95.00% | 103 | M9: Oxidation,<br>M12: Oxidation,<br>M14: Oxidation                    | 1176.0080 | 2 | 10.0 | 401 | 422 | No  |
|     |             |       |                                                  | ASSHSTDLMAMAMGSVEASYK     | R | C | 95.00% | 80  | M14: Oxidation,<br>M9: Oxidation,<br>M12: Oxidation,<br>M9: Oxidation, | 784.3365  | 3 | 4.3  | 401 | 422 | No  |
|     |             |       |                                                  | ASSHSTDLMAMAMGSVEASYK     | R | C | 95.00% | 55  | M14: Oxidation                                                         | 779.0058  | 3 | 5.4  | 401 | 422 | No  |
|     |             |       |                                                  | DPVQEAWAEDVDLR            | K | V | 95.00% | 105 |                                                                        | 821.8973  | 2 | 9.4  | 476 | 489 | Yes |
|     |             |       |                                                  | DPVQEAWAEDVDLR            | K | V | 95.00% | 65  |                                                                        | 548.2656  | 3 | 5.9  | 476 | 489 | Yes |
|     |             |       |                                                  | EAEAAMFHR                 | R | K | 95.00% | 51  | M6: Oxidation                                                          | 539.2463  | 2 | 5.7  | 384 | 392 | No  |
|     |             |       |                                                  | EAEAAMFHR                 | R | K | 95.00% | 58  |                                                                        | 531.2472  | 2 | 2.5  | 384 | 392 | No  |
|     |             |       |                                                  | FDEILEASDGIMVAR           | R | G | 95.00% | 120 | M12: Oxidation                                                         | 841.4142  | 2 | 5.8  | 280 | 294 | Yes |
|     |             |       |                                                  | FGVEQDVMVFASFIR           | K | K | 95.00% | 121 | M9: Oxidation                                                          | 938.4593  | 2 | 8.4  | 231 | 246 | Yes |
|     |             |       |                                                  | FGVEQDVMVFASFIR           | K | K | 95.00% | 67  | M9: Oxidation                                                          | 625.9751  | 3 | 7.8  | 231 | 246 | Yes |
|     |             |       |                                                  | FGVEQDVMVFASFIR           | K | K | 95.00% | 135 |                                                                        | 930.4608  | 2 | 7.4  | 231 | 246 | Yes |
|     |             |       |                                                  | FGVEQDVMVFASFIR           | K | K | 95.00% | 63  |                                                                        | 620.6429  | 3 | 7.0  | 231 | 246 | Yes |
|     |             |       |                                                  | FGVEQDVMVFASFIRK          | K | A | 95.00% | 39  | M9: Oxidation                                                          | 668.6734  | 3 | 7.2  | 231 | 247 | Yes |
|     |             |       |                                                  | GADFLVTEVENGSLGSK         | K | K | 95.00% | 125 |                                                                        | 890.4471  | 2 | 5.5  | 189 | 206 | Yes |
|     |             |       |                                                  | GADFLVTEVENGSLGSK         | K | K | 95.00% | 62  |                                                                        | 593.9673  | 3 | 5.4  | 189 | 206 | Yes |
|     |             |       |                                                  | GADFLVTEVENGSLGSKK        | K | G | 95.00% | 101 |                                                                        | 954.4987  | 2 | 9.5  | 189 | 207 | Yes |
|     |             |       |                                                  | GADFLVTEVENGSLGSKK        | K | G | 95.00% | 57  |                                                                        | 636.6658  | 3 | 5.3  | 189 | 207 | Yes |
|     |             |       |                                                  | GDLGIEIPA EK              | R | V | 95.00% | 48  |                                                                        | 1141.6160 | 1 | 4.6  | 295 | 305 | Yes |
|     |             |       |                                                  | GDLGIEIPA EK              | R | V | 95.00% | 69  |                                                                        | 571.3098  | 2 | 0.9  | 295 | 305 | Yes |
|     |             |       |                                                  | GDVVIVLTGWRPGSGFTNTMR     | K | V | 95.00% | 59  | M20: Oxidation                                                         | 760.3990  | 3 | 9.1  | 506 | 526 | Yes |
|     |             |       |                                                  | GDYPLEAVR                 | K | M | 95.00% | 48  |                                                                        | 1019.5200 | 1 | 3.7  | 368 | 376 | Yes |
|     |             |       |                                                  | GDYPLEAVR                 | K | M | 95.00% | 55  |                                                                        | 510.2637  | 2 | 3.2  | 368 | 376 | Yes |
|     |             |       |                                                  | GP EIR                    | K | T | 95.00% | 30  |                                                                        | 571.3227  | 1 | 4.0  | 116 | 120 | Yes |
|     |             |       |                                                  | GS GTAEVELK               | K | K | 95.00% | 54  |                                                                        | 495.7619  | 2 | 5.2  | 126 | 135 | Yes |
|     |             |       |                                                  | GS GTAEVELKK              | K | G | 95.00% | 53  |                                                                        | 559.8099  | 2 | 5.5  | 126 | 136 | Yes |
|     |             |       |                                                  | GVNLPGA AVDLP AVSEK       | K | D | 95.00% | 137 |                                                                        | 818.9545  | 2 | 6.1  | 208 | 224 | Yes |
|     |             |       |                                                  | GVNLPGA AVDLP AVSEK       | K | D | 95.00% | 59  |                                                                        | 546.3052  | 3 | 5.4  | 208 | 224 | Yes |
|     |             |       |                                                  | GVNLPGA AVDLP AVSEKDIQDLK | K | F | 95.00% | 92  |                                                                        | 1175.1470 | 2 | 7.8  | 208 | 230 | Yes |
|     |             |       |                                                  | GVNLPGA AVDLP AVSEKDIQDLK | K | F | 95.00% | 64  |                                                                        | 783.7662  | 3 | 6.9  | 208 | 230 | Yes |
|     |             |       |                                                  | IENHEGVR                  | K | R | 95.00% | 48  |                                                                        | 477.2477  | 2 | 7.5  | 271 | 278 | Yes |





|                  |             |      |                             |                        |          |   |        |     |           |     |      |     |     |     |
|------------------|-------------|------|-----------------------------|------------------------|----------|---|--------|-----|-----------|-----|------|-----|-----|-----|
| 384              | IPI00243742 | MYL3 | MYOSIN LIGHT POLYPEPTIDE 3. | AAPAPAPPPEPERPK        | K        | E | 95.00% | 78  | 762.9166  | 2   | 5.0  | 19  | 33  | No  |
|                  |             |      |                             | AAPAPAPPPEPERPK        | K        | E | 95.00% | 44  | 508.9456  | 3   | 2.3  | 19  | 33  | No  |
|                  |             |      |                             | AAPAPAPPPEPERKPEVEFDAS | K        | I | 95.00% | 32  | 810.7540  | 3   | 6.4  | 19  | 41  | No  |
|                  |             |      |                             | ALGQNPTQAEVLR          | R        | V | 95.00% | 110 | 698.8840  | 2   | 3.8  | 82  | 94  | No  |
|                  |             |      |                             | ALGQNPTQAEVLR          | R        | V | 95.00% | 56  | 466.2599  | 3   | 6.6  | 82  | 94  | No  |
|                  |             |      |                             | DTGTIEDFVEGLR          | K        | V | 95.00% | 86  | 751.3503  | 2   | 7.7  | 126 | 138 | No  |
|                  |             |      |                             | DTGTIEDFVEGLR          | K        | V | 95.00% | 49  | 501.2364  | 3   | 8.1  | 126 | 138 | No  |
|                  |             |      |                             | EAFMLFDR               | K        | T | 95.00% | 74  | 522.7468  | 2   | 3.2  | 56  | 63  | No  |
|                  |             |      |                             | EAFMLFDR               | K        | T | 95.00% | 38  | 1028.4970 | 1   | 8.7  | 56  | 63  | No  |
|                  |             |      |                             | EAFMLFDR               | K        | T | 95.00% | 48  | 514.7499  | 2   | 4.2  | 56  | 63  | No  |
|                  |             |      |                             | EGNGTVMGAELR           | K        | H | 95.00% | 46  | 625.2998  | 2   | 5.7  | 143 | 154 | Yes |
|                  |             |      |                             | EGNGTVMGAELR           | K        | H | 95.00% | 67  | 617.3024  | 2   | 5.8  | 143 | 154 | Yes |
|                  |             |      |                             | EVEFDASK               | K        | I | 95.00% | 33  | 924.4379  | 1   | 6.9  | 34  | 41  | No  |
|                  |             |      |                             | EVEFDASK               | K        | I | 95.00% | 30  | 462.7225  | 2   | 6.3  | 34  | 41  | No  |
|                  |             |      |                             | HIMSS                  | K        | - | 95.00% | 21  | 574.2687  | 1   | 5.0  | 191 | 195 | No  |
|                  |             |      |                             | HVLATLGER              | R        | L | 95.00% | 57  | 995.5731  | 1   | 9.3  | 155 | 163 | No  |
|                  |             |      |                             | HVLATLGER              | R        | L | 95.00% | 66  | 498.2840  | 2   | -3.7 | 155 | 163 | No  |
|                  |             |      |                             | IEFTPEQIEEFK           | K        | E | 95.00% | 86  | 755.3837  | 2   | 7.7  | 44  | 55  | No  |
|                  |             |      |                             | IEFTPEQIEEFK           | K        | E | 95.00% | 48  | 503.9256  | 3   | 8.8  | 44  | 55  | No  |
|                  |             |      |                             | IEFTPEQIEEFKEAFMLFDR   | K        | T | 95.00% | 34  | 845.7506  | 3   | 9.5  | 44  | 63  | No  |
|                  |             |      |                             | IKIEFTPEQIEEFK         | K        | E | 95.00% | 87  | 875.9752  | 2   | 8.9  | 42  | 55  | No  |
|                  |             |      |                             | IKIEFTPEQIEEFK         | K        | E | 95.00% | 71  | 584.3176  | 3   | 5.9  | 42  | 55  | No  |
|                  |             |      |                             | IKIEFTPEQIEEFKEAFMLFDR | K        | T | 95.00% | 64  | 694.8585  | 4   | 7.0  | 42  | 63  | No  |
|                  |             |      |                             | IKIEFTPEQIEEFKEAFMLFDR | K        | T | 95.00% | 36  | 690.8611  | 4   | 9.1  | 42  | 63  | No  |
|                  |             |      |                             | ITYGQCQGDVLR           | K        | A | 95.00% | 52  | 612.8101  | 2   | 6.2  | 71  | 81  | No  |
|                  |             |      |                             | LTEDEVEK               | R        | L | 95.00% | 46  | 481.7409  | 2   | 5.8  | 164 | 171 | No  |
|                  |             |      |                             | MMDFETFLPMLQHISK       | K        | N | 95.00% | 70  | 992.4822  | 2   | 9.1  | 108 | 123 | No  |
|                  |             |      |                             | MMDFETFLPMLQHISK       | K        | N | 95.00% | 66  | 661.9880  | 3   | 5.0  | 108 | 123 | No  |
|                  |             |      |                             | MMDFETFLPMLQHISK       | K        | N | 95.00% | 42  | 667.3206  | 3   | 6.5  | 108 | 123 | No  |
|                  |             |      |                             | MMDFETFLPMLQHISK       | K        | N | 95.00% | 48  | 1008.4770 | 2   | 9.3  | 108 | 123 | No  |
|                  |             |      |                             | MMDFETFLPMLQHISK       | K        | N | 95.00% | 42  | 667.3206  | 3   | 6.5  | 108 | 123 | No  |
|                  |             |      |                             | MMDFETFLPMLQHISK       | K        | N | 95.00% | 48  | 1008.4770 | 2   | 9.3  | 108 | 123 | No  |
|                  |             |      |                             | MMDFETFLPMLQHISK       | K        | N | 95.00% | 39  | 672.6491  | 3   | 1.7  | 108 | 123 | No  |
|                  |             |      |                             | MMDFETFLPMLQHISK       | K        | N | 95.00% | 56  | 992.4820  | 2   | 8.9  | 108 | 123 | No  |
|                  |             |      |                             | MMDFETFLPMLQHISK       | K        | N | 95.00% | 83  | 992.4825  | 2   | 9.5  | 108 | 123 | No  |
|                  |             |      |                             | MMDFETFLPMLQHISK       | K        | N | 95.00% | 67  | 661.9891  | 3   | 6.6  | 108 | 123 | No  |
|                  |             |      |                             | MMDFETFLPMLQHISK       | K        | N | 95.00% | 49  | 1000.4780 | 2   | 7.8  | 108 | 123 | No  |
|                  |             |      |                             | MMDFETFLPMLQHISK       | K        | N | 95.00% | 49  | 1000.4780 | 2   | 7.8  | 108 | 123 | No  |
|                  |             |      |                             | MMDFETFLPMLQHISK       | K        | N | 95.00% | 56  | 984.4814  | 2   | 5.8  | 108 | 123 | No  |
|                  |             |      |                             | MMDFETFLPMLQHISK       | K        | N | 95.00% | 52  | 656.6579  | 3   | 7.3  | 108 | 123 | No  |
|                  |             |      |                             | NKDTGTIEDFVEGLR        | K        | V | 95.00% | 116 | 872.4194  | 2   | 6.7  | 124 | 138 | No  |
|                  |             |      |                             | NKDTGTIEDFVEGLR        | K        | V | 95.00% | 72  | 581.9503  | 3   | 9.2  | 124 | 138 | No  |
|                  |             |      |                             | VFDKEGNGTVMGAELR       | R        | H | 95.00% | 90  | 869.9314  | 2   | 6.6  | 139 | 154 | Yes |
|                  |             |      |                             | VFDKEGNGTVMGAELR       | R        | H | 95.00% | 43  | 580.2899  | 3   | 6.1  | 139 | 154 | Yes |
|                  |             |      |                             | VFDKEGNGTVMGAELR       | R        | H | 95.00% | 132 | 861.9331  | 2   | 5.7  | 139 | 154 | Yes |
| VFDKEGNGTVMGAELR | R           | H    | 95.00%                      | 51                     | 574.9572 | 3 | 4.3    | 139 | 154       | Yes |      |     |     |     |
| ELPELLQR         | K           | N    | 95.00%                      | 31                     | 499.2904 | 2 | 4.5    | 444 | 451       | No  |      |     |     |     |
| ETVLSALSR        | K           | E    | 95.00%                      | 32                     | 488.2789 | 2 | 2.6    | 165 | 173       | No  |      |     |     |     |
| FYNELTEILVR      | K           | F    | 95.00%                      | 55                     | 698.8813 | 2 | 5.2    | 681 | 691       | No  |      |     |     |     |
| LALASLGYEK       | K           | S    | 95.00%                      | 58                     | 532.8052 | 2 | 3.1    | 111 | 120       | No  |      |     |     |     |
| LANQAADYFGDAFK   | K           | Q    | 95.00%                      | 75                     | 765.8710 | 2 | 7.4    | 216 | 229       | No  |      |     |     |     |
| LLDEEATDNDLR     | R           | A    | 95.00%                      | 95                     | 766.8655 | 2 | 9.7    | 462 | 474       | No  |      |     |     |     |
| MVPVSVQQSLAAYNQR | K           | K    | 95.00%                      | 112                    | 903.9669 | 2 | 4.9    | 363 | 378       | No  |      |     |     |     |
| NIQVSHQEFK       | K           | M    | 95.00%                      | 38                     | 658.8376 | 2 | 5.7    | 633 | 643       | No  |      |     |     |     |
| SLLSNLDEVKK      | K           | E    | 95.00%                      | 59                     | 623.3602 | 2 | 5.6    | 559 | 569       | No  |      |     |     |     |
| SLLSNLDEVKK      | K           | E    | 95.00%                      | 28                     | 415.9087 | 3 | 4.0    | 559 | 569       | No  |      |     |     |     |
| SVIEQGGIQTVDQLIK | R           | E    | 95.00%                      | 103                    | 864.4865 | 2 | 6.1    | 428 | 443       | No  |      |     |     |     |
| TMQGSSEVVNLK     | K           | S    | 95.00%                      | 40                     | 660.8497 | 2 | 6.3    | 547 | 558       | No  |      |     |     |     |
| TPSNELYKPLR      | R           | A    | 95.00%                      | 33                     | 659.3665 | 2 | 6.3    | 484 | 494       | No  |      |     |     |     |
| FSWFAGEK         | K           | L    | 95.00%                      | 40                     | 486.2384 | 2 | 6.4    | 149 | 156       | No  |      |     |     |     |
| IRVDIENQVMDFR    | K           | T    | 95.00%                      | 31                     | 588.6464 | 3 | 6.9    | 99  | 112       | No  |      |     |     |     |
| ITQSNAILR        | K           | Y    | 95.00%                      | 79                     | 508.3018 | 2 | 5.6    | 74  | 82        | Yes |      |     |     |     |

|                         |                          |         |                                                                                                              |                          |             |       |                                        |                      |           |   |        |     |           |    |     |     |     |    |
|-------------------------|--------------------------|---------|--------------------------------------------------------------------------------------------------------------|--------------------------|-------------|-------|----------------------------------------|----------------------|-----------|---|--------|-----|-----------|----|-----|-----|-----|----|
| 387                     | IPI00255554; IPI00410073 | GPR123  | ISOFORM 1 OF PROBABLE G-PROTEIN COUPLED RECEPTOR 123.; ISOFORM 2 OF PROBABLE G-PROTEIN COUPLED RECEPTOR 123. | AAAQKTGR                 | K           | L     | 95.00%                                 | 30                   | 401.7302  | 2 | -1.2   | 144 | 151       | No |     |     |     |    |
|                         |                          |         |                                                                                                              | VLIINTPSGR               | R           | T     | 95.00%                                 | 24                   | 535.3234  | 2 | 1.7    | 320 | 329       | No |     |     |     |    |
| 388                     | IPI00289499              | ATIC    | BIFUNCTIONAL PURINE BIOSYNTHESIS PROTEIN PURH.                                                               | ALFEEVPELLTEAEK          | K           | K     | 95.00%                                 | 31                   | 859.4451  | 2 | -4.5   | 510 | 524       | No |     |     |     |    |
|                         |                          |         |                                                                                                              | ALFEEVPELLTEAEKK         | K           | E     | 95.00%                                 | 30                   | 616.0053  | 3 | 8.1    | 510 | 525       | No |     |     |     |    |
|                         |                          |         |                                                                                                              | APGQLALFSVSDK            | M           | T     | 95.00%                                 | 85                   | 666.8655  | 2 | 5.0    | 2   | 14        | No |     |     |     |    |
|                         |                          |         |                                                                                                              | DLIVATIIVK               | R           | Y     | 95.00%                                 | 57                   | 521.8321  | 2 | 4.7    | 417 | 426       | No |     |     |     |    |
|                         |                          |         |                                                                                                              | EVSDGIIAPGYEEEEALTILSK   | R           | K     | 95.00%                                 | 62                   | 1117.5840 | 2 | 7.3    | 336 | 356       | No |     |     |     |    |
|                         |                          |         |                                                                                                              | EVSDGIIAPGYEEEEALTILSK   | R           | K     | 95.00%                                 | 50                   | 745.3913  | 3 | 6.0    | 336 | 356       | No |     |     |     |    |
|                         |                          |         |                                                                                                              | HVSPAGAAVGIPLSEDEAK      | K           | V     | 95.00%                                 | 85                   | 924.4817  | 2 | 2.7    | 267 | 285       | No |     |     |     |    |
|                         |                          |         |                                                                                                              | HVSPAGAAVGIPLSEDEAK      | K           | V     | 95.00%                                 | 37                   | 616.6568  | 3 | 2.2    | 267 | 285       | No |     |     |     |    |
|                         |                          |         |                                                                                                              | LDNFLIR                  | R           | V     | 95.00%                                 | 52                   | 445.7604  | 2 | 3.4    | 91  | 97        | No |     |     |     |    |
|                         |                          |         |                                                                                                              | NLTALGLNLVASGGTAK        | R           | A     | 95.00%                                 | 97                   | 800.4613  | 2 | 4.7    | 23  | 39        | No |     |     |     |    |
|                         |                          |         |                                                                                                              | RAEISNAIDQYVTGTIGEDEDLIK | K           | W     | 95.00%                                 | 62                   | 884.1174  | 3 | 5.8    | 484 | 507       | No |     |     |     |    |
|                         |                          |         |                                                                                                              | SLFSNVVTK                | K           | N     | 95.00%                                 | 32                   | 497.7841  | 2 | 3.0    | 398 | 406       | No |     |     |     |    |
|                         |                          |         |                                                                                                              | YGMNPHQTPAQLYTLQPK       | R           | L     | 95.00%                                 | 56                   | 701.6865  | 3 | 4.8    | 208 | 225       | No |     |     |     |    |
|                         |                          |         |                                                                                                              | 389                      | IPI00289758 | CAPN2 | CALPAIN-2 CATALYTIC SUBUNIT PRECURSOR. | IMVDMLDSDGSGK        | K         | L | 95.00% | 44  | 700.3138  | 2  | 7.9 | 579 | 591 | No |
| NPWGEVEWTGR             | R                        | W       | 95.00%                                                                                                       |                          |             |       |                                        | 67                   | 665.8187  | 2 | 8.6    | 286 | 296       | No |     |     |     |    |
| SDTFINLR                | R                        | E       | 95.00%                                                                                                       |                          |             |       |                                        | 45                   | 483.2601  | 2 | 7.0    | 462 | 469       | No |     |     |     |    |
| 390                     | IPI00290416              | GTPBP9  | ISOFORM 1 OF PUTATIVE GTP-BINDING PROTEIN 9.                                                                 | FYHDWNDKEIEVLNK          | R           | H     | 95.00%                                 | 72                   | 975.4804  | 2 | 6.8    | 202 | 216       | No |     |     |     |    |
|                         |                          |         |                                                                                                              | FYHDWNDKEIEVLNK          | R           | H     | 95.00%                                 | 47                   | 650.6544  | 3 | 4.0    | 202 | 216       | No |     |     |     |    |
|                         |                          |         |                                                                                                              | IGIVGLPNVGK              | K           | S     | 95.00%                                 | 58                   | 533.8376  | 2 | 4.3    | 25  | 35        | No |     |     |     |    |
|                         |                          |         |                                                                                                              | IPAFLNVDIAGLVK           | K           | G     | 95.00%                                 | 118                  | 784.9807  | 2 | 7.5    | 84  | 98        | No |     |     |     |    |
|                         |                          |         |                                                                                                              | IPAFLNVDIAGLVK           | K           | G     | 95.00%                                 | 76                   | 523.6553  | 3 | 5.4    | 84  | 98        | No |     |     |     |    |
|                         |                          |         |                                                                                                              | LQELSAEER                | K           | Q     | 95.00%                                 | 36                   | 537.7785  | 2 | 5.6    | 271 | 279       | No |     |     |     |    |
|                         |                          |         |                                                                                                              | NYIVEDGDIFFK             | R           | F     | 95.00%                                 | 61                   | 786.9073  | 2 | 7.5    | 374 | 386       | No |     |     |     |    |
|                         |                          |         |                                                                                                              | PMVYLVNLSEKDYIR          | K           | K     | 95.00%                                 | 43                   | 619.3315  | 3 | 8.6    | 224 | 238       | No |     |     |     |    |
|                         |                          |         |                                                                                                              | WLIIKIK                  | K           | E     | 95.00%                                 | 25                   | 400.7729  | 2 | -2.5   | 243 | 248       | No |     |     |     |    |
|                         |                          |         |                                                                                                              | YEDFKEEGSENAVK           | K           | A     | 95.00%                                 | 42                   | 822.8796  | 2 | 7.3    | 350 | 363       | No |     |     |     |    |
|                         |                          |         |                                                                                                              | YLEANMTQSALPK            | K           | I     | 95.00%                                 | 75                   | 741.3756  | 2 | 8.2    | 282 | 294       | No |     |     |     |    |
| 391                     | IPI00290553; IPI00793673 | ALDH1L1 | 10-FORMYLTETRAHYDROFOLATE DEHYDROGENASE.; FORMYLTETRAHYDROFOLATE DEHYDROGENASE ISOFORM A VARIANT.            | ADPLGLEAEKDGVPVFK        | K           | Y     | 95.00%                                 | 38                   | 892.9837  | 2 | 8.9    | 39  | 55        | No |     |     |     |    |
|                         |                          |         |                                                                                                              | AGLILFGNDDK              | K           | M     | 95.00%                                 | 31                   | 581.8138  | 2 | 7.6    | 275 | 285       | No |     |     |     |    |
|                         |                          |         |                                                                                                              | ANATEFGLASGVFTR          | R           | D     | 95.00%                                 | 49                   | 770.8981  | 2 | 8.1    | 827 | 841       | No |     |     |     |    |
|                         |                          |         |                                                                                                              | DLGEALNEYLR              | K           | V     | 95.00%                                 | 71                   | 682.3513  | 2 | 6.4    | 893 | 904       | No |     |     |     |    |
|                         |                          |         |                                                                                                              | FADGDLDAVLSR             | R           | A     | 95.00%                                 | 76                   | 639.8256  | 2 | 7.9    | 815 | 826       | No |     |     |     |    |
|                         |                          |         |                                                                                                              | GAASSVLELLEAEVLTAEAVR    | K           | S     | 95.00%                                 | 51                   | 706.0500  | 3 | 9.7    | 308 | 328       | No |     |     |     |    |
|                         |                          |         |                                                                                                              | HGSIYHPSLLPR             | R           | H     | 95.00%                                 | 34                   | 497.2829  | 3 | 3.3    | 110 | 122       | No |     |     |     |    |
|                         |                          |         |                                                                                                              | IGFTGSTEVGK              | K           | H     | 95.00%                                 | 39                   | 548.2917  | 2 | 6.1    | 646 | 656       | No |     |     |     |    |
|                         |                          |         |                                                                                                              | IQGSTIPINQAR             | K           | P     | 95.00%                                 | 49                   | 649.3702  | 2 | 7.4    | 540 | 551       | No |     |     |     |    |
|                         |                          |         |                                                                                                              | LFVEDSIHDEFVR            | R           | R     | 95.00%                                 | 32                   | 803.4028  | 2 | 4.0    | 723 | 735       | No |     |     |     |    |
|                         |                          |         |                                                                                                              | LFVEDSIHDEFVR            | R           | R     | 95.00%                                 | 32                   | 535.9391  | 3 | 6.5    | 713 | 725       | No |     |     |     |    |
|                         |                          |         |                                                                                                              | LPQPPEGATYEGIQK          | R           | K     | 95.00%                                 | 62                   | 830.4174  | 2 | 2.1    | 191 | 205       | No |     |     |     |    |
|                         |                          |         |                                                                                                              | LPQPPEGATYEGIQKK         | R           | E     | 95.00%                                 | 36                   | 596.6472  | 3 | 4.2    | 191 | 206       | No |     |     |     |    |
|                         |                          |         |                                                                                                              | LOAGTVFVNTYNK            | K           | T     | 95.00%                                 | 65                   | 727.8929  | 2 | 9.3    | 853 | 865       | No |     |     |     |    |
|                         |                          |         |                                                                                                              | TDVAAPFGGFK              | K           | Q     | 95.00%                                 | 37                   | 555.2873  | 2 | 3.2    | 876 | 886       | No |     |     |     |    |
|                         |                          |         |                                                                                                              | VLEVEDSTDFK              | K           | S     | 95.00%                                 | 77                   | 714.8544  | 2 | 7.8    | 348 | 359       | No |     |     |     |    |
|                         |                          |         |                                                                                                              | 392                      | IPI00290566 | TCP1  | T-COMPLEX PROTEIN 1 SUBUNIT ALPHA.     | AFHNEAQVNER          | R         | K | 95.00% | 30  | 706.3461  | 2  | 8.8 | 469 | 480 | No |
|                         |                          |         |                                                                                                              |                          |             |       |                                        | DDKHGSYEDAVHSGALND   | K         | - | 95.00% | 32  | 643.9512  | 3  | 8.5 | 539 | 556 | No |
|                         |                          |         |                                                                                                              |                          |             |       |                                        | EQLAIAEFAR           | R         | S | 95.00% | 53  | 574.3117  | 2  | 3.7 | 434 | 443 | No |
|                         |                          |         |                                                                                                              |                          |             |       |                                        | LGVQVVITDPEKLDQIR    | K         | Q | 95.00% | 40  | 641.7068  | 3  | 6.9 | 248 | 264 | No |
|                         |                          |         |                                                                                                              |                          |             |       |                                        | MLVDDIGDVTITNDGATILK | K         | L | 95.00% | 129 | 1060.5530 | 2  | 8.5 | 44  | 63  | No |
| MLVDDIGDVTITNDGATILK    | K                        | L       | 95.00%                                                                                                       |                          |             |       |                                        | 40                   | 707.3706  | 3 | 7.6    | 44  | 63        | No |     |     |     |    |
| SLLVIPNTLAVNAAQDSTDLVAK | R                        | L       | 95.00%                                                                                                       |                          |             |       |                                        | 101                  | 1177.1640 | 2 | 9.5    | 444 | 466       | No |     |     |     |    |
| SQNVMAAASIANIVK         | R                        | S       | 95.00%                                                                                                       |                          |             |       |                                        | 111                  | 766.9138  | 2 | 6.1    | 19  | 33        | No |     |     |     |    |
| YINENLIVNTDELGR         | R                        | D       | 95.00%                                                                                                       |                          |             |       |                                        | 98                   | 881.9582  | 2 | 6.2    | 131 | 145       | No |     |     |     |    |
| YPVNSVNILK              | R                        | A       | 95.00%                                                                                                       |                          |             |       |                                        | 36                   | 573.8326  | 2 | 4.5    | 190 | 199       | No |     |     |     |    |

| Accession             | Gene                                               | Protein | Residue                                                                                                                                                 | Position                | Conservation             | Score     | Modifications                                  | Score                 | Score                                                        | Score    | Score  | Score | Score | Score     | Score |     |     |     |    |
|-----------------------|----------------------------------------------------|---------|---------------------------------------------------------------------------------------------------------------------------------------------------------|-------------------------|--------------------------|-----------|------------------------------------------------|-----------------------|--------------------------------------------------------------|----------|--------|-------|-------|-----------|-------|-----|-----|-----|----|
| 393                   | IPI00290770; IPI00552715; IPI00553185; IPI00744315 | CCT3    | CHAPERONIN CONTAINING TCP1, SUBUNIT 3 ISOFORM B.; CHAPERONIN CONTAINING TCP1, SUBUNIT 3 ISOFORM C.; T-COMPLEX PROTEIN 1 SUBUNIT GAMMA.; 60 KDA PROTEIN. | AVAQALEVIPR             | R                        | T         | 95.00%                                         | 73                    |                                                              | 583.8515 | 2      | 4.6   | 438   | 448       | No    |     |     |     |    |
|                       |                                                    |         |                                                                                                                                                         | ELGIWEPLAVK             | K                        | L         | 95.00%                                         | 46                    |                                                              | 627.8625 | 2      | 5.8   | 491   | 501       | No    |     |     |     |    |
|                       |                                                    |         |                                                                                                                                                         | GISDLAQHYLMR            | K                        | A         | 95.00%                                         | 60                    | M11: Oxidation                                               | 710.3596 | 2      | 4.0   | 294   | 305       | No    |     |     |     |    |
|                       |                                                    |         |                                                                                                                                                         | GISDLAQHYLMR            | K                        | A         | 95.00%                                         | 41                    | M11: Oxidation                                               | 473.9101 | 3      | 6.4   | 294   | 305       | No    |     |     |     |    |
|                       |                                                    |         |                                                                                                                                                         | IVLLDSSLEYK             | R                        | K         | 95.00%                                         | 55                    |                                                              | 640.3661 | 2      | 7.3   | 237   | 247       | No    |     |     |     |    |
|                       |                                                    |         |                                                                                                                                                         | IVSRPEELREDDVGTGAGLLEIK | R                        | K         | 95.00%                                         | 36                    |                                                              | 832.7871 | 3      | 5.9   | 330   | 352       | No    |     |     |     |    |
|                       |                                                    |         |                                                                                                                                                         | IVSRPEELREDDVGTGAGLLEIK | R                        | K         | 95.00%                                         | 31                    |                                                              | 624.8413 | 4      | 4.3   | 330   | 352       | No    |     |     |     |    |
|                       |                                                    |         |                                                                                                                                                         | KGESQTDIEITREEDFTR      | K                        | I         | 95.00%                                         | 34                    |                                                              | 718.6866 | 3      | 5.8   | 248   | 265       | No    |     |     |     |    |
|                       |                                                    |         |                                                                                                                                                         | KGESQTDIEITREEDFTR      | K                        | I         | 95.00%                                         | 37                    |                                                              | 539.2659 | 4      | 3.9   | 248   | 265       | No    |     |     |     |    |
|                       |                                                    |         |                                                                                                                                                         | TAVETAVLLLR             | K                        | I         | 95.00%                                         | 108                   |                                                              | 593.3676 | 2      | 5.6   | 507   | 517       | No    |     |     |     |    |
|                       |                                                    |         |                                                                                                                                                         | DLDVAILVGSMPR           | K                        | R         | 95.00%                                         | 94                    | M11: Oxidation                                               | 701.3810 | 2      | 9.1   | 80    | 92        | No    |     |     |     |    |
|                       |                                                    |         |                                                                                                                                                         | DLDVAILVGSMPR           | K                        | R         | 95.00%                                         | 48                    | M11: Oxidation                                               | 467.9224 | 3      | 7.1   | 80    | 92        | No    |     |     |     |    |
|                       |                                                    |         |                                                                                                                                                         | DLDVAILVGSMPR           | K                        | R         | 95.00%                                         | 44                    |                                                              | 693.3828 | 2      | 8.0   | 80    | 92        | No    |     |     |     |    |
|                       |                                                    |         |                                                                                                                                                         | DVIATDKEDVAFK           | K                        | D         | 95.00%                                         | 99                    |                                                              | 725.8823 | 2      | 9.4   | 67    | 79        | No    |     |     |     |    |
|                       |                                                    |         |                                                                                                                                                         | DVIATDKEDVAFK           | K                        | D         | 95.00%                                         | 45                    |                                                              | 484.2550 | 3      | 4.3   | 67    | 79        | No    |     |     |     |    |
| ELTEEKESAFELSSA       | K                                                  | -       | 95.00%                                                                                                                                                  | 59                      |                          | 908.9340  | 2                                              | 6.0                   | 319                                                          | 334      | No     |       |       |           |       |     |     |     |    |
| ESAFELSSA             | K                                                  | -       | 95.00%                                                                                                                                                  | 66                      |                          | 544.2562  | 2                                              | 9.1                   | 325                                                          | 334      | No     |       |       |           |       |     |     |     |    |
| EVGVYEALK             | K                                                  | D       | 95.00%                                                                                                                                                  | 30                      |                          | 1007.5430 | 1                                              | 1.8                   | 206                                                          | 214      | No     |       |       |           |       |     |     |     |    |
| EVGVYEALK             | K                                                  | D       | 95.00%                                                                                                                                                  | 40                      |                          | 504.2779  | 2                                              | 6.7                   | 206                                                          | 214      | No     |       |       |           |       |     |     |     |    |
| EVGVYEALKDSSWLK       | K                                                  | G       | 95.00%                                                                                                                                                  | 89                      |                          | 876.4524  | 2                                              | 6.4                   | 206                                                          | 220      | No     |       |       |           |       |     |     |     |    |
| EVGVYEALKDSSWLK       | K                                                  | G       | 95.00%                                                                                                                                                  | 32                      |                          | 584.6364  | 3                                              | 4.5                   | 206                                                          | 220      | No     |       |       |           |       |     |     |     |    |
| FVEGLPINDFSR          | K                                                  | E       | 95.00%                                                                                                                                                  | 67                      |                          | 697.3640  | 2                                              | 6.1                   | 299                                                          | 310      | No     |       |       |           |       |     |     |     |    |
| GEFVTTVQQR            | K                                                  | G       | 95.00%                                                                                                                                                  | 74                      |                          | 582.8060  | 2                                              | 2.3                   | 221                                                          | 230      | No     |       |       |           |       |     |     |     |    |
| LGVTANDVK             | K                                                  | N       | 95.00%                                                                                                                                                  | 34                      |                          | 916.5185  | 1                                              | 8.8                   | 171                                                          | 179      | No     |       |       |           |       |     |     |     |    |
| LGVTANDVK             | K                                                  | N       | 95.00%                                                                                                                                                  | 60                      |                          | 458.7596  | 2                                              | 1.1                   | 171                                                          | 179      | No     |       |       |           |       |     |     |     |    |
| NVIIVGNHSSSTQYPDYNHAK | K                                                  | V       | 95.00%                                                                                                                                                  | 54                      |                          | 760.7143  | 3                                              | 4.8                   | 180                                                          | 199      | No     |       |       |           |       |     |     |     |    |
| SQGAALDKYAK           | K                                                  | K       | 95.00%                                                                                                                                                  | 63                      |                          | 576.3095  | 2                                              | 4.3                   | 111                                                          | 121      | No     |       |       |           |       |     |     |     |    |
| VLVTGAAGQIAYSLLSYNGSV | R                                                  | D       | 95.00%                                                                                                                                                  | 87                      |                          | 862.4785  | 3                                              | 8.5                   | 7                                                            | 32       | No     |       |       |           |       |     |     |     |    |
| FGK                   | R                                                  | D       | 95.00%                                                                                                                                                  | 87                      |                          | 862.4785  | 3                                              | 8.5                   | 7                                                            | 32       | No     |       |       |           |       |     |     |     |    |
| 395                   | IPI00291006                                        | MDH2    | MALATE DEHYDROGENASE, MITOCHONDRIAL PRECURSOR.                                                                                                          | AGAGSATLSMAYAGAR        | K                        | F         | 95.00%                                         | 124                   | M10: Oxidation                                               | 735.8558 | 2      | 1.8   | 242   | 257       | No    |     |     |     |    |
|                       |                                                    |         |                                                                                                                                                         | AGAGSATLSMAYAGAR        | K                        | F         | 95.00%                                         | 48                    | M10: Oxidation                                               | 490.9088 | 3      | 6.6   | 242   | 257       | No    |     |     |     |    |
|                       |                                                    |         |                                                                                                                                                         | AGAGSATLSMAYAGAR        | K                        | F         | 95.00%                                         | 72                    |                                                              | 727.8621 | 2      | 7.0   | 242   | 257       | No    |     |     |     |    |
|                       |                                                    |         |                                                                                                                                                         | AKAGAGSATLSMAYAGAR      | K                        | F         | 95.00%                                         | 53                    | M12: Oxidation                                               | 835.4255 | 2      | 6.0   | 240   | 257       | No    |     |     |     |    |
|                       |                                                    |         |                                                                                                                                                         | AKAGAGSATLSMAYAGAR      | K                        | F         | 95.00%                                         | 45                    | M12: Oxidation                                               | 557.2873 | 3      | 7.8   | 240   | 257       | No    |     |     |     |    |
|                       |                                                    |         |                                                                                                                                                         | ANTFVAELK               | R                        | G         | 95.00%                                         | 34                    |                                                              | 992.5497 | 1      | 8.1   | 177   | 185       | No    |     |     |     |    |
|                       |                                                    |         |                                                                                                                                                         | ANTFVAELK               | R                        | G         | 95.00%                                         | 74                    |                                                              | 496.7764 | 2      | 3.4   | 177   | 185       | No    |     |     |     |    |
|                       |                                                    |         |                                                                                                                                                         | ANTFVAELKGLDPPAR        | R                        | V         | 95.00%                                         | 55                    |                                                              | 801.4431 | 2      | 8.2   | 177   | 191       | No    |     |     |     |    |
|                       |                                                    |         |                                                                                                                                                         | ANTFVAELKGLDPPAR        | R                        | V         | 95.00%                                         | 45                    |                                                              | 534.6315 | 3      | 8.5   | 177   | 191       | No    |     |     |     |    |
|                       |                                                    |         |                                                                                                                                                         | FVFLVDAMNGK             | R                        | E         | 95.00%                                         | 66                    | M9: Oxidation                                                | 672.3434 | 2      | 9.0   | 258   | 269       | No    |     |     |     |    |
|                       |                                                    |         |                                                                                                                                                         | FVFLVDAMNGK             | R                        | E         | 95.00%                                         | 82                    |                                                              | 664.3442 | 2      | 6.5   | 258   | 269       | No    |     |     |     |    |
|                       |                                                    |         |                                                                                                                                                         | GLDPPARVNPVIGGHAGK      | K                        | T         | 95.00%                                         | 44                    |                                                              | 586.3383 | 3      | 9.6   | 186   | 203       | No    |     |     |     |    |
|                       |                                                    |         |                                                                                                                                                         | HGVYNPNKIFGVTTLDIVR     | K                        | A         | 95.00%                                         | 40                    |                                                              | 715.0674 | 3      | 9.5   | 158   | 176       | No    |     |     |     |    |
|                       |                                                    |         |                                                                                                                                                         | IFGVTTLDIVR             | K                        | A         | 95.00%                                         | 68                    |                                                              | 617.3683 | 2      | 6.5   | 166   | 176       | No    |     |     |     |    |
|                       |                                                    |         |                                                                                                                                                         | IQEAGTEVVK              | R                        | A         | 95.00%                                         | 66                    |                                                              | 537.2971 | 2      | 1.7   | 230   | 239       | No    |     |     |     |    |
|                       |                                                    |         |                                                                                                                                                         | KGEDFVK                 | K                        | T         | 95.00%                                         | 30                    |                                                              | 411.7255 | 2      | 8.2   | 329   | 335       | No    |     |     |     |    |
|                       |                                                    |         |                                                                                                                                                         | LTLYDIAHTPGVAADLSHIETK  | R                        | A         | 95.00%                                         | 89                    |                                                              | 789.0914 | 3      | 7.6   | 53    | 74        | No    |     |     |     |    |
|                       |                                                    |         |                                                                                                                                                         | MISDAIPELK              | K                        | A         | 95.00%                                         | 62                    | M1: Oxidation                                                | 566.8037 | 2      | 6.1   | 315   | 324       | No    |     |     |     |    |
|                       |                                                    |         |                                                                                                                                                         | MISDAIPELK              | K                        | A         | 95.00%                                         | 58                    |                                                              | 558.8061 | 2      | 5.9   | 315   | 324       | No    |     |     |     |    |
|                       |                                                    |         |                                                                                                                                                         | VAVLGASGGIGQPLSLLLK     | K                        | N         | 95.00%                                         | 142                   |                                                              | 897.0569 | 2      | 8.7   | 27    | 45        | No    |     |     |     |    |
|                       |                                                    |         |                                                                                                                                                         | VAVLGASGGIGQPLSLLLK     | K                        | N         | 95.00%                                         | 60                    |                                                              | 598.3719 | 3      | 5.4   | 27    | 45        | No    |     |     |     |    |
|                       |                                                    |         |                                                                                                                                                         | VDFPQDQLTALTGR          | K                        | I         | 95.00%                                         | 111                   |                                                              | 780.9121 | 2      | 8.9   | 216   | 229       | No    |     |     |     |    |
|                       |                                                    |         |                                                                                                                                                         | VDFPQDQLTALTGR          | K                        | I         | 95.00%                                         | 47                    |                                                              | 520.9444 | 3      | 9.7   | 216   | 229       | No    |     |     |     |    |
|                       |                                                    |         |                                                                                                                                                         | VNVPVIGGHAGK            | R                        | T         | 95.00%                                         | 81                    |                                                              | 574.3345 | 2      | 2.0   | 192   | 203       | No    |     |     |     |    |
|                       |                                                    |         |                                                                                                                                                         | VSSFEEKMISDAIPELK       | K                        | A         | 95.00%                                         | 30                    | M8: Oxidation, M9: Oxidation, M10: Oxidation, M11: Oxidation | 647.0016 | 3      | 8.1   | 308   | 324       | No    |     |     |     |    |
|                       |                                                    |         |                                                                                                                                                         | 396                     | IPI00291175; IPI00307162 | VCL       | ISOFORM 1 OF VINCULIN.; ISOFORM 2 OF VINCULIN. | AGEVINQPMMAAR         | K                                                            | Q        | 95.00% | 68    |       | 783.8621  | 2     | 5.5 | 890 | 903 | No |
|                       |                                                    |         |                                                                                                                                                         |                         |                          |           |                                                | AIPDLTAPVAAVQAAVSNLVR | K                                                            | V        | 95.00% | 127   |       | 1038.6030 | 2     | 7.5 | 36  | 56  | No |
| AIPDLTAPVAAVQAAVSNLVR | K                                                  | V       | 95.00%                                                                                                                                                  |                         |                          |           |                                                | 62                    |                                                              | 692.7371 | 3      | 6.7   | 36    | 56        | No    |     |     |     |    |
| ALASQLQDSLK           | R                                                  | D       | 95.00%                                                                                                                                                  |                         |                          |           |                                                | 71                    |                                                              | 587.3306 | 2      | 4.5   | 571   | 581       | No    |     |     |     |    |
| AQQVSQGLDLTAK         | K                                                  | V       | 95.00%                                                                                                                                                  |                         |                          |           |                                                | 90                    |                                                              | 729.4048 | 2      | 3.5   | 353   | 366       | No    |     |     |     |    |
| AQQVSQGLDLTAK         | K                                                  | V       | 95.00%                                                                                                                                                  |                         |                          |           |                                                | 59                    |                                                              | 486.6054 | 3      | 2.8   | 353   | 366       | No    |     |     |     |    |
| AVAGNISDPGLQK         | K                                                  | S       | 95.00%                                                                                                                                                  |                         |                          |           |                                                | 64                    |                                                              | 635.3481 | 2      | 6.2   | 803   | 815       | No    |     |     |     |    |

|     |                          |       |                                              |                              |   |   |        |     |                                             |           |   |     |      |      |     |
|-----|--------------------------|-------|----------------------------------------------|------------------------------|---|---|--------|-----|---------------------------------------------|-----------|---|-----|------|------|-----|
|     |                          |       |                                              | DPSASPGDAGEQAIR              | R | Q | 95.00% | 80  |                                             | 735.8521  | 2 | 9.4 | 286  | 300  | No  |
|     |                          |       |                                              | EAFQPQEPDFPPPPDLEQLR         | R | L | 95.00% | 51  |                                             | 816.4087  | 3 | 9.0 | 833  | 853  | No  |
|     |                          |       |                                              | ELLPVLISAMK                  | K | I | 95.00% | 37  | M10: Oxidation                              | 615.3675  | 2 | 7.3 | 200  | 210  | No  |
|     |                          |       |                                              | ELLPVLISAMK                  | K | I | 95.00% | 29  |                                             | 607.3670  | 2 | 2.4 | 200  | 210  | No  |
|     |                          |       |                                              | ELTPQVVSAR                   | R | I | 95.00% | 66  |                                             | 585.8319  | 2 | 6.6 | 670  | 680  | No  |
|     |                          |       |                                              | ETVQTTEDQILK                 | K | R | 95.00% | 49  |                                             | 702.8705  | 2 | 7.6 | 60   | 71   | No  |
|     |                          |       |                                              | ETVQTTEDQILKR                | K | D | 95.00% | 85  |                                             | 780.9178  | 2 | 2.7 | 60   | 72   | No  |
|     |                          |       |                                              | GILSGTSDLLLTFDEAEVR          | R | K | 95.00% | 80  |                                             | 1018.5370 | 2 | 5.3 | 114  | 132  | No  |
|     |                          |       |                                              | GILSGTSDLLLTFDEAEVRK         | R | I | 95.00% | 31  |                                             | 722.0608  | 3 | 7.7 | 114  | 133  | No  |
|     |                          |       |                                              | GWLRDPSASPGDAGEQAIR          | K | Q | 95.00% | 56  |                                             | 661.6642  | 3 | 4.2 | 282  | 300  | No  |
|     |                          |       |                                              | KIDAAQNWLADPNGGPEGEEQIR      | K | G | 95.00% | 52  |                                             | 836.7485  | 3 | 7.0 | 387  | 409  | No  |
|     |                          |       |                                              | LANVMMGPYR                   | R | Q | 95.00% | 40  | M5: Oxidation, M6: Oxidation                | 592.2875  | 2 | 5.8 | 529  | 538  | No  |
|     |                          |       |                                              | LLAVAATAPPDAPNREEVFDER       | K | A | 95.00% | 47  |                                             | 794.4128  | 3 | 5.3 | 608  | 629  | No  |
|     |                          |       |                                              | LVQAAQMLQSDPYSPAR            | K | D | 95.00% | 89  | M7: Oxidation                               | 995.5135  | 2 | 6.2 | 88   | 105  | No  |
|     |                          |       |                                              | LVQAAQMLQSDPYSPAR            | K | D | 95.00% | 47  | M7: Oxidation                               | 664.0120  | 3 | 6.7 | 88   | 105  | No  |
|     |                          |       |                                              | MALLMAEMSR                   | R | L | 95.00% | 46  | M1: Oxidation, M5: Oxidation, M8: Oxidation | 600.7789  | 2 | 6.2 | 926  | 935  | No  |
|     |                          |       |                                              | MLGQMTDQVADLR                | K | A | 95.00% | 89  | M1: Oxidation, M5: Oxidation                | 755.3590  | 2 | 3.9 | 327  | 339  | No  |
|     |                          |       |                                              | MQEAMTQEVSDVFSDDTTPIK        | R | L | 95.00% | 150 | M1: Oxidation, M5: Oxidation                | 1195.5520 | 2 | 8.8 | 587  | 607  | No  |
|     |                          |       |                                              | MQEAMTQEVSDVFSDDTTPIK        | R | L | 95.00% | 40  | M1: Oxidation, M5: Oxidation                | 797.3683  | 3 | 6.3 | 587  | 607  | No  |
|     |                          |       |                                              | MSAEINEIIR                   | K | V | 95.00% | 79  | M1: Oxidation                               | 596.3086  | 2 | 4.3 | 237  | 246  | No  |
|     |                          |       |                                              | MSAEINEIIR                   | K | V | 95.00% | 75  |                                             | 588.3099  | 2 | 2.1 | 237  | 246  | No  |
|     |                          |       |                                              | MTGLVDEAIDTK                 | K | S | 95.00% | 80  | M1: Oxidation                               | 654.8266  | 2 | 7.2 | 709  | 720  | No  |
|     |                          |       |                                              | NPGNQAAEYHFETMK              | R | N | 95.00% | 59  | M14: Oxidation                              | 876.8909  | 2 | 4.9 | 685  | 699  | No  |
|     |                          |       |                                              | NQGIEEALK                    | K | N | 95.00% | 33  |                                             | 501.2688  | 2 | 2.8 | 220  | 228  | No  |
|     |                          |       |                                              | QVATALQNLQTK                 | K | T | 95.00% | 76  |                                             | 657.8772  | 2 | 6.3 | 465  | 476  | No  |
|     |                          |       |                                              | SLGEISALTSK                  | R | L | 95.00% | 68  |                                             | 553.3109  | 2 | 3.1 | 434  | 444  | No  |
|     |                          |       |                                              | SLLDASEEAIKK                 | K | D | 95.00% | 89  |                                             | 652.3611  | 2 | 2.6 | 721  | 732  | No  |
|     |                          |       |                                              | STVEGIQASVK                  | K | T | 95.00% | 74  |                                             | 559.8090  | 2 | 3.9 | 656  | 666  | No  |
|     |                          |       |                                              | TDAGFTLR                     | R | W | 95.00% | 30  |                                             | 440.7316  | 2 | 2.8 | 1050 | 1057 | No  |
|     |                          |       |                                              | TIESILEPVAQQISHLVIMHEEGEVDGK | R | A | 95.00% | 50  | M19: Oxidation                              | 1039.8740 | 3 | 9.2 | 8    | 35   | No  |
|     |                          |       |                                              | TISPMVMDAK                   | K | A | 95.00% | 34  | M5: Oxidation, M7: Oxidation                | 562.7731  | 2 | 4.6 | 793  | 802  | No  |
|     |                          |       |                                              | TNISDEESEQATEMLVHNAQNL       | R | E | 95.00% | 109 | M14: Oxidation, M23: Oxidation              | 1026.8150 | 3 | 9.9 | 1009 | 1035 | No  |
|     |                          |       |                                              | MQSVK                        | R | E | 95.00% | 109 | M3: Oxidation, M10: Oxidation               | 1037.5510 | 2 | 7.2 | 739  | 758  | No  |
|     |                          |       |                                              | VAMANIQPQMLVAGATSIAR         | K | R | 95.00% | 121 | M3: Oxidation, M10: Oxidation               | 692.0361  | 3 | 6.6 | 739  | 758  | No  |
|     |                          |       |                                              | VAMANIQPQMLVAGATSIAR         | K | R | 95.00% | 46  |                                             | 742.9134  | 2 | 7.7 | 548  | 561  | No  |
|     |                          |       |                                              | VDQLTAQLADLAAR               | R | G | 95.00% | 94  |                                             | 615.6770  | 3 | 3.7 | 57   | 72   | No  |
|     |                          |       |                                              | VGKETVQTTEDQILKR             | R | D | 95.00% | 42  |                                             | 874.9359  | 2 | 8.2 | 247  | 261  | No  |
|     |                          |       |                                              | VLQLTSWDEDAWASK              | R | D | 95.00% | 60  | M2: Oxidation, M7: Oxidation                | 634.3278  | 2 | 7.0 | 189  | 199  | No  |
|     |                          |       |                                              | VMLVNSMNTVK                  | R | E | 95.00% | 35  |                                             | 615.7951  | 2 | 5.5 | 503  | 512  | No  |
|     |                          |       |                                              | WIDNPTVDDR                   | R | G | 95.00% | 58  |                                             | 654.6615  | 3 | 6.2 | 169  | 187  | No  |
| 397 | IPI00291922              | PSMA5 | PROTEASOME SUBUNIT ALPHA TYPE 5.             | AIGSASEGAQSSLQEYVHK          | R | S | 95.00% | 39  |                                             | 724.3780  | 2 | 8.8 | 54   | 66   | No  |
|     |                          |       |                                              | ITSPLMEPSSIEK                | R | I | 95.00% | 64  | M6: Oxidation                               | 712.4024  | 2 | 9.3 | 21   | 32   | No  |
|     |                          |       |                                              | LFQVEYAIEAIK                 | R | L | 95.00% | 75  |                                             |           |   |     |      |      |     |
| 398 | IPI00291928; IPI00646415 | RAB14 | RAS-RELATED PROTEIN RAB-14.; 20 KDA PROTEIN. | GAAGALMVYDITR                | R | R | 95.00% | 56  | M7: Oxidation                               | 677.3511  | 2 | 7.8 | 83   | 95   | No  |
|     |                          |       |                                              | LQIWDTAGQER                  | K | F | 95.00% | 51  |                                             | 658.8402  | 2 | 9.5 | 62   | 72   | Yes |
|     |                          |       |                                              | YIIIGDMGVGK                  | K | S | 95.00% | 30  | M7: Oxidation                               | 591.3193  | 2 | 5.6 | 14   | 24   | No  |



| Accession                | Protein     | Residue | Quality                                                                                  | Score                  | Mass                                                                 | Modifications | Score                                      | Value     | Length         | Score     | Value  | Length | Value          | Score     |    |     |
|--------------------------|-------------|---------|------------------------------------------------------------------------------------------|------------------------|----------------------------------------------------------------------|---------------|--------------------------------------------|-----------|----------------|-----------|--------|--------|----------------|-----------|----|-----|
| 406                      | IPI00294911 | SDHB    | SUCCINATE DEHYDROGENASE [UBIQUINONE]<br>IRON-SULFUR SUBUNIT, MITOCHONDRIAL<br>PRECURSOR. | FIVDGVHEMDAENPLHQSPSL  |                                                                      |               |                                            |           |                |           |        |        |                |           |    |     |
|                          |             |         |                                                                                          | NK                     | K                                                                    | L             | 95.00%                                     | 41        |                | 921.1127  | 3      | 6.5    | 272            | 295       | No |     |
|                          |             |         |                                                                                          | GDASKEDIDTAMK          | R                                                                    | L             | 95.00%                                     | 59        | M12: Oxidation | 698.8226  | 2      | 7.5    | 237            | 249       | No |     |
|                          |             |         |                                                                                          | GDASKEDIDTAMK          | R                                                                    | L             | 95.00%                                     | 42        | M12: Oxidation | 466.2159  | 3      | 3.8    | 237            | 249       | No |     |
|                          |             |         |                                                                                          | HVTVIGGGLMGAGIAQVAAATG |                                                                      |               |                                            |           |                |           |        |        |                |           |    |     |
|                          |             |         |                                                                                          | HTVVLVDQTEDILAK        | K                                                                    | S             | 95.00%                                     | 41        | M10: Oxidation | 726.5963  | 5      | 3.7    | 29             | 65        | No |     |
|                          |             |         |                                                                                          | HVTVIGGGLMGAGIAQVAAATG |                                                                      |               |                                            |           |                |           |        |        |                |           |    |     |
|                          |             |         |                                                                                          | HTVVLVDQTEDILAK        | K                                                                    | S             | 95.00%                                     | 31        |                | 903.9998  | 4      | 9.3    | 29             | 65        | No |     |
|                          |             |         |                                                                                          | LLVPYLMEAIR            | R                                                                    | L             | 95.00%                                     | 66        | M7: Oxidation  | 667.3874  | 2      | 8.7    | 222            | 232       | No |     |
|                          |             |         |                                                                                          | LLVPYLMEAIR            | R                                                                    | L             | 95.00%                                     | 58        |                | 659.3886  | 2      | 6.7    | 222            | 232       | No |     |
|                          |             |         |                                                                                          | LVEVIK                 | K                                                                    | T             | 95.00%                                     | 26        |                | 700.4675  | 1      | 9.2    | 180            | 185       | No |     |
| TFESLVDFSK               | K           | A       | 95.00%                                                                                   | 71                     |                                                                      | 586.8013      | 2                                          | 9.3       | 193            | 202       | No     |        |                |           |    |     |
| 406                      | IPI00294911 | SDHB    | SUCCINATE DEHYDROGENASE [UBIQUINONE]<br>IRON-SULFUR SUBUNIT, MITOCHONDRIAL<br>PRECURSOR. | AGDKPHMQTYEVDLNLK      | K                                                                    | C             | 95.00%                                     | 51        | M7: Oxidation  | 931.4472  | 2      | 5.9    | 52             | 67        | No |     |
|                          |             |         |                                                                                          | AGDKPHMQTYEVDLNLK      | K                                                                    | C             | 95.00%                                     | 48        | M7: Oxidation  | 621.3000  | 3      | 4.8    | 52             | 67        | No |     |
|                          |             |         |                                                                                          | DLVPDLSNFYAQYK         | K                                                                    | S             | 95.00%                                     | 34        |                | 836.9206  | 2      | 6.6    | 138            | 151       | No |     |
|                          |             |         |                                                                                          | IKNEVDSTLTFR           | K                                                                    | R             | 95.00%                                     | 57        |                | 711.8874  | 2      | 5.4    | 79             | 90        | No |     |
|                          |             |         |                                                                                          | IKNEVDSTLTFR           | K                                                                    | R             | 95.00%                                     | 37        |                | 474.9269  | 3      | 4.0    | 79             | 90        | No |     |
|                          |             |         |                                                                                          | LQDPFSLYR              | K                                                                    | C             | 95.00%                                     | 47        |                | 569.8031  | 2      | 7.5    | 234            | 242       | No |     |
|                          |             |         |                                                                                          | NEVDSTLTFR             | K                                                                    | R             | 95.00%                                     | 35        |                | 591.2964  | 2      | 3.9    | 81             | 90        | No |     |
|                          |             |         |                                                                                          | QQYLQSIER              | K                                                                    | E             | 95.00%                                     | 44        |                | 647.3279  | 2      | 3.1    | 168            | 177       | No |     |
|                          |             |         |                                                                                          | SIEPLYK                | K                                                                    | K             | 95.00%                                     | 27        |                | 425.2418  | 2      | 4.1    | 152            | 158       | No |     |
|                          |             |         |                                                                                          | YLGPAVLMOQAYR          | K                                                                    | W             | 95.00%                                     | 62        | M8: Oxidation  | 699.3728  | 2      | 9.0    | 206            | 217       | No |     |
|                          |             |         |                                                                                          | 407                    | IPI00294959                                                          | LDB3          | ISOFORM 2 OF LIM DOMAIN-BINDING PROTEIN 3. | MTHLEAQNK | K              | I         | 95.00% | 135    | M23: Oxidation | 1090.8760 | 3  | 6.4 |
| AAQSQLSQGDLVVAIDGVNTDT   |             |         |                                                                                          |                        |                                                                      |               |                                            |           |                |           |        |        |                |           |    |     |
| AAQSQLSQGDLVVAIDGVNTDT   | K           | I       | 95.00%                                                                                   |                        |                                                                      |               |                                            | 63        | M23: Oxidation | 818.4085  | 4      | 6.0    | 38             | 68        | No |     |
| DFNMPLTISR               | K           | I       | 95.00%                                                                                   |                        |                                                                      |               |                                            | 53        | M4: Oxidation  | 605.3036  | 2      | 4.5    | 22             | 31        | No |     |
| DFNMPLTISR               | K           | I       | 95.00%                                                                                   |                        |                                                                      |               |                                            | 31        |                | 597.3060  | 2      | 4.4    | 22             | 31        | No |     |
| DLAVDSASPVIQAVIK         | K           | S       | 95.00%                                                                                   |                        |                                                                      |               |                                            | 54        | Y11: Phospho   | 878.4399  | 2      | 8.5    | 189            | 204       | No |     |
| DLAVDSASPVIQAVIK         | K           | S       | 95.00%                                                                                   |                        |                                                                      |               |                                            | 114       |                | 838.4539  | 2      | 5.5    | 189            | 204       | No |     |
| DLAVDSASPVIQAVIK         | K           | S       | 95.00%                                                                                   |                        |                                                                      |               |                                            | 66        |                | 559.3046  | 3      | 4.4    | 189            | 204       | No |     |
| DSALSTHKPIEVK            | K           | G       | 95.00%                                                                                   |                        |                                                                      |               |                                            | 55        |                | 712.8923  | 2      | 1.3    | 129            | 141       | No |     |
| DSALSTHKPIEVK            | K           | G       | 95.00%                                                                                   |                        |                                                                      |               |                                            | 42        |                | 475.5997  | 3      | 5.9    | 129            | 141       | No |     |
| DYINLFSTK                | K           | C       | 95.00%                                                                                   |                        |                                                                      |               |                                            | 48        |                | 1100.5710 | 1      | 7.3    | 550            | 558       | No |     |
| DYINLFSTK                | K           | C       | 95.00%                                                                                   | 52                     |                                                                      | 550.7886      | 2                                          | 6.0       | 550            | 558       | No     |        |                |           |    |     |
| FNPSALKDSALSTHKPIEVK     | R           | G       | 95.00%                                                                                   | 35                     |                                                                      | 728.0710      | 3                                          | 4.5       | 122            | 141       | No     |        |                |           |    |     |
| GGPAYTPAGPQVPLAR         | R           | G       | 95.00%                                                                                   | 93                     |                                                                      | 824.9488      | 2                                          | 5.1       | 407            | 423       | No     |        |                |           |    |     |
| GPFLVAMGR                | R           | S       | 95.00%                                                                                   | 60                     | M7: Oxidation                                                        | 482.2604      | 2                                          | 4.6       | 450            | 458       | No     |        |                |           |    |     |
| GPFLVAMGR                | R           | S       | 95.00%                                                                                   | 51                     |                                                                      | 474.2622      | 2                                          | 3.0       | 450            | 458       | No     |        |                |           |    |     |
| ILAQMTGTEFMQDPDEEALR     | R           | R       | 95.00%                                                                                   | 72                     | M5: Oxidation,<br>M11: Oxidation                                     | 1164.0410     | 2                                          | 9.0       | 230            | 249       | No     |        |                |           |    |     |
| ILAQMTGTEFMQDPDEEALR     | R           | R       | 95.00%                                                                                   | 50                     | M11: Oxidation                                                       | 776.3610      | 3                                          | 5.9       | 230            | 249       | No     |        |                |           |    |     |
| ILAQMTGTEFMQDPDEEALRR    | R           | S       | 95.00%                                                                                   | 42                     | M11: Oxidation                                                       | 823.0633      | 3                                          | 5.8       | 230            | 250       | No     |        |                |           |    |     |
| ILAQMTGTEFMQDPDEEALRR    | R           | S       | 95.00%                                                                                   | 57                     | M5: Oxidation,<br>M11: Oxidation,<br>M2: Oxidation, M6:<br>Oxidation | 828.3950      | 3                                          | 5.9       | 230            | 250       | No     |        |                |           |    |     |
| IMGEVMHALR               | K           | Q       | 95.00%                                                                                   | 54                     |                                                                      | 594.7989      | 2                                          | 2.5       | 507            | 516       | No     |        |                |           |    |     |
| IMGEVMHALR               | K           | Q       | 95.00%                                                                                   | 48                     |                                                                      | 578.8055      | 2                                          | 5.2       | 507            | 516       | No     |        |                |           |    |     |
| LOGGKDFNMPLTISR          | R           | I       | 95.00%                                                                                   | 68                     | M9: Oxidation                                                        | 846.9435      | 2                                          | 2.7       | 17             | 31        | No     |        |                |           |    |     |
| LOGGKDFNMPLTISR          | R           | I       | 95.00%                                                                                   | 46                     | M9: Oxidation                                                        | 564.9650      | 3                                          | 2.7       | 17             | 31        | No     |        |                |           |    |     |
| RPPISTTAPPVQTPLPVIHQK    | K           | V       | 95.00%                                                                                   | 73                     |                                                                      | 829.8263      | 3                                          | 7.2       | 85             | 107       | No     |        |                |           |    |     |
| RPPISTTAPPVQTPLPVIHQK    | K           | V       | 95.00%                                                                                   | 27                     |                                                                      | 622.6229      | 4                                          | 9.1       | 85             | 107       | No     |        |                |           |    |     |
| SASYNLSLTLQK             | K           | S       | 95.00%                                                                                   | 86                     |                                                                      | 662.8620      | 2                                          | 3.7       | 71             | 82        | No     |        |                |           |    |     |
| SKRPIPISTTAPPVQTPLPVIHQK | K           | V       | 95.00%                                                                                   | 53                     |                                                                      | 901.5352      | 3                                          | 6.5       | 83             | 107       | No     |        |                |           |    |     |
| SKRPIPISTTAPPVQTPLPVIHQK | K           | V       | 95.00%                                                                                   | 64                     |                                                                      | 676.4044      | 4                                          | 8.0       | 83             | 107       | No     |        |                |           |    |     |
| SKRPIPISTTAPPVQTPLPVIHQK | K           | V       | 95.00%                                                                                   | 30                     |                                                                      | 541.3224      | 5                                          | 3.0       | 83             | 107       | No     |        |                |           |    |     |
| SQNKPEDEAEWAR            | K           | R       | 95.00%                                                                                   | 77                     |                                                                      | 837.8750      | 2                                          | 3.6       | 205            | 218       | No     |        |                |           |    |     |
| SQNKPEDEAEWAR            | K           | R       | 95.00%                                                                                   | 47                     |                                                                      | 558.9188      | 3                                          | 2.7       | 205            | 218       | No     |        |                |           |    |     |
| SRPQASSYSPAVAASSAPATHT   |             |         |                                                                                          |                        |                                                                      |               |                                            |           |                |           |        |        |                |           |    |     |
| SYSEGPAAPAK              | R           | P       | 95.00%                                                                                   | 94                     |                                                                      | 1100.5450     | 3                                          | 8.6       | 251            | 284       | No     |        |                |           |    |     |
| SRPQASSYSPAVAASSAPATHT   |             |         |                                                                                          |                        |                                                                      |               |                                            |           |                |           |        |        |                |           |    |     |
| SYSEGPAAPAK              | R           | P       | 95.00%                                                                                   | 86                     |                                                                      | 825.6575      | 4                                          | 4.1       | 251            | 284       | No     |        |                |           |    |     |
| SRPQASSYSPAVAASSAPATHT   |             |         |                                                                                          |                        |                                                                      |               |                                            |           |                |           |        |        |                |           |    |     |
| SYSEGPAAPAKPR            | R           | V       | 95.00%                                                                                   | 94                     |                                                                      | 888.9462      | 4                                          | 4.2       | 251            | 286       | No     |        |                |           |    |     |

|     |                          |      |                                                                          |                                                                                                                                            |   |   |        |     |                                |           |   |      |     |     |    |  |  |  |  |
|-----|--------------------------|------|--------------------------------------------------------------------------|--------------------------------------------------------------------------------------------------------------------------------------------|---|---|--------|-----|--------------------------------|-----------|---|------|-----|-----|----|--|--|--|--|
|     |                          |      |                                                                          | SRPQASSYSPAASSAPATHT                                                                                                                       |   |   |        |     |                                |           |   |      |     |     |    |  |  |  |  |
|     |                          |      |                                                                          | SYSEGPAAPAPKPR                                                                                                                             | R | V | 95.00% | 70  |                                | 711.3574  | 5 | 2.5  | 251 | 286 | No |  |  |  |  |
|     |                          |      |                                                                          | VVNSPANADYQER                                                                                                                              | K | F | 95.00% | 89  |                                | 781.3884  | 2 | 5.1  | 108 | 121 | No |  |  |  |  |
|     |                          |      |                                                                          | VVNSPANADYQER                                                                                                                              | K | F | 95.00% | 67  |                                | 521.2606  | 3 | 3.4  | 108 | 121 | No |  |  |  |  |
| 408 | IPI00295386              | CBR1 | CARBONYL REDUCTASE [NADPH] 1.                                            | FHQLDIDDLQSIR                                                                                                                              | R | A | 95.00% | 44  |                                | 533.9455  | 3 | 4.7  | 59  | 71  | No |  |  |  |  |
|     |                          |      |                                                                          | GQAAVQQLQAEGLSPR                                                                                                                           | R | F | 95.00% | 84  |                                | 826.9468  | 2 | 8.3  | 43  | 58  | No |  |  |  |  |
|     |                          |      |                                                                          | GQAAVQQLQAEGLSPR                                                                                                                           | R | F | 95.00% | 32  |                                | 551.6335  | 3 | 7.7  | 43  | 58  | No |  |  |  |  |
|     |                          |      |                                                                          | LFSGDVLLTAR                                                                                                                                | R | D | 95.00% | 52  |                                | 589.3373  | 2 | 7.4  | 28  | 38  | No |  |  |  |  |
|     |                          |      |                                                                          | VVNSSIMSVR                                                                                                                                 | R | A | 95.00% | 57  | M8: Oxidation                  | 603.8333  | 2 | 6.1  | 135 | 145 | No |  |  |  |  |
|     |                          |      |                                                                          | TRYPTOPHANYL-TRNA SYNTHETASE, CYTOPLASMIC.; TRYPTOPHANYL-TRNA SYNTHETASE ISOFORM B.                                                        |   |   |        |     |                                |           |   |      |     |     |    |  |  |  |  |
| 409 | IPI00295400; IPI00412737 | WARS |                                                                          | ALIEVLQPLIAHQAR                                                                                                                            | K | R | 95.00% | 50  |                                | 601.0195  | 3 | 4.9  | 433 | 448 | No |  |  |  |  |
|     |                          |      |                                                                          | DLTLDQAYSVAVENAK                                                                                                                           | K | D | 95.00% | 95  |                                | 900.9443  | 2 | 8.4  | 205 | 220 | No |  |  |  |  |
|     |                          |      |                                                                          | DMNQVLDAYENK                                                                                                                               | R | K | 95.00% | 47  | M2: Oxidation                  | 728.3307  | 2 | 7.5  | 101 | 112 | No |  |  |  |  |
|     |                          |      |                                                                          | GIDYDKLIVR                                                                                                                                 | K | F | 95.00% | 75  |                                | 596.3441  | 2 | 5.3  | 97  | 106 | No |  |  |  |  |
|     |                          |      |                                                                          | ISFPAIQAAPSFNSFPQIFR                                                                                                                       | K | D | 95.00% | 41  |                                | 1163.0960 | 2 | -8.1 | 278 | 298 | No |  |  |  |  |
|     |                          |      |                                                                          | MSASDPNSSIFLTDTAK                                                                                                                          | K | Q | 95.00% | 106 | M1: Oxidation                  | 900.9264  | 2 | 6.8  | 350 | 366 | No |  |  |  |  |
|     |                          |      |                                                                          | PALLHSTFFPALGGAQTK                                                                                                                         | K | M | 95.00% | 48  |                                | 643.0247  | 3 | 7.3  | 332 | 349 | No |  |  |  |  |
|     |                          |      |                                                                          | TFIFSDLDYMGMSGFYK                                                                                                                          | K | N | 95.00% | 37  | M10: Oxidation, M12: Oxidation | 1070.9730 | 2 | 6.2  | 232 | 249 | No |  |  |  |  |
| 410 | IPI00295777; IPI00797300 | GPD1 | GLYCEROL-3-PHOSPHATE DEHYDROGENASE [NAD+], CYTOPLASMIC.; 35 KDA PROTEIN. | ANATGISLIK                                                                                                                                 | K | G | 95.00% | 28  |                                | 987.5910  | 1 | 7.2  | 111 | 120 | No |  |  |  |  |
|     |                          |      |                                                                          | ANATGISLIK                                                                                                                                 | K | G | 95.00% | 85  |                                | 494.2974  | 2 | 3.2  | 88  | 97  | No |  |  |  |  |
|     |                          |      |                                                                          | DPAQGQLLK                                                                                                                                  | K | E | 95.00% | 50  |                                | 485.2757  | 2 | 6.5  | 170 | 178 | No |  |  |  |  |
|     |                          |      |                                                                          | ELMQTPNFR                                                                                                                                  | K | I | 95.00% | 57  | M3: Oxidation                  | 576.2823  | 2 | 4.2  | 179 | 187 | No |  |  |  |  |
|     |                          |      |                                                                          | ELYSILQHK                                                                                                                                  | R | G | 95.00% | 43  |                                | 565.8176  | 2 | 5.5  | 305 | 313 | No |  |  |  |  |
|     |                          |      |                                                                          | FPLFMAVYK                                                                                                                                  | K | V | 95.00% | 30  | M5: Oxidation                  | 566.3020  | 2 | 4.3  | 319 | 327 | No |  |  |  |  |
|     |                          |      |                                                                          | GLVDKFPLFMAVYK                                                                                                                             | K | V | 95.00% | 44  | M10: Oxidation                 | 548.6370  | 3 | 4.8  | 291 | 304 | No |  |  |  |  |
|     |                          |      |                                                                          | GLVDKFPLFMAVYK                                                                                                                             | K | V | 95.00% | 75  |                                | 814.4573  | 2 | 8.8  | 291 | 304 | No |  |  |  |  |
|     |                          |      |                                                                          | GLVDKFPLFMAVYK                                                                                                                             | K | V | 95.00% | 31  |                                | 543.3067  | 3 | 7.3  | 314 | 327 | No |  |  |  |  |
|     |                          |      |                                                                          | IVGGNAAQLAQFDPR                                                                                                                            | K | V | 95.00% | 88  |                                | 778.9192  | 2 | 7.7  | 21  | 35  | No |  |  |  |  |
|     |                          |      |                                                                          | IVGGNAAQLAQFDPR                                                                                                                            | K | V | 95.00% | 59  |                                | 519.6137  | 3 | 4.4  | 21  | 35  | No |  |  |  |  |
|     |                          |      |                                                                          | KLTEINTQHENVK                                                                                                                              | K | Y | 95.00% | 105 |                                | 833.9653  | 2 | 5.9  | 49  | 62  | No |  |  |  |  |
|     |                          |      |                                                                          | KLTEINTQHENVK                                                                                                                              | K | Y | 95.00% | 46  |                                | 556.3141  | 3 | 8.3  | 49  | 62  | No |  |  |  |  |
|     |                          |      |                                                                          | KVAEAFAR                                                                                                                                   | R | T | 95.00% | 31  |                                | 446.2588  | 2 | 5.2  | 272 | 279 | No |  |  |  |  |
|     |                          |      |                                                                          | LGIPMSVLMGANIASEVADEK                                                                                                                      | R | F | 95.00% | 107 | M5: Oxidation, M9: Oxidation   | 1089.0530 | 2 | 6.5  | 117 | 137 | No |  |  |  |  |
|     |                          |      |                                                                          | LGIPMSVLMGANIASEVADEK                                                                                                                      | R | F | 95.00% | 82  | M5: Oxidation, M9: Oxidation   | 726.3708  | 3 | 6.1  | 117 | 137 | No |  |  |  |  |
|     |                          |      |                                                                          | LGLMEMIAFAK                                                                                                                                | R | L | 95.00% | 56  | M4: Oxidation, M6: Oxidation   | 628.3281  | 2 | 4.1  | 230 | 240 | No |  |  |  |  |
|     |                          |      |                                                                          | LGLMEMIAFAK                                                                                                                                | R | L | 95.00% | 73  |                                | 612.3343  | 2 | 6.1  | 207 | 217 | No |  |  |  |  |
|     |                          |      |                                                                          | LISEVIGER                                                                                                                                  | K | L | 95.00% | 71  |                                | 508.2945  | 2 | 2.2  | 131 | 139 | No |  |  |  |  |
|     |                          |      |                                                                          | LTEIINTQHENVK                                                                                                                              | K | Y | 95.00% | 102 |                                | 769.9187  | 2 | 7.5  | 50  | 62  | No |  |  |  |  |
|     |                          |      |                                                                          | LTEIINTQHENVK                                                                                                                              | K | Y | 95.00% | 29  |                                | 513.6132  | 3 | 3.9  | 50  | 62  | No |  |  |  |  |
|     |                          |      |                                                                          | SIEQLEKELLNGQK                                                                                                                             | K | L | 95.00% | 33  |                                | 543.6379  | 3 | 7.3  | 283 | 296 | No |  |  |  |  |
|     |                          |      |                                                                          | VTMWVFEEDIGGK                                                                                                                              | R | K | 95.00% | 60  | M3: Oxidation                  | 763.8677  | 2 | 4.7  | 36  | 48  | No |  |  |  |  |
|     |                          |      |                                                                          | VTMWVFEEDIGGK                                                                                                                              | R | L | 95.00% | 71  | M3: Oxidation                  | 827.9175  | 2 | 7.2  | 36  | 49  | No |  |  |  |  |
|     |                          |      |                                                                          | VTMWVFEEDIGGK                                                                                                                              | R | L | 95.00% | 51  | M3: Oxidation                  | 552.2812  | 3 | 7.6  | 36  | 49  | No |  |  |  |  |
|     |                          |      |                                                                          | ISOFORM MITOCHONDRIAL OF FUMARATE HYDRATASE, MITOCHONDRIAL PRECURSOR.; ISOFORM CYTOPLASMIC OF FUMARATE HYDRATASE, MITOCHONDRIAL PRECURSOR. |   |   |        |     |                                |           |   |      |     |     |    |  |  |  |  |
| 411 | IPI00296053; IPI00759715 | FH   |                                                                          | AAAEVNQDYGLDPK                                                                                                                             | R | I | 95.00% | 93  |                                | 745.8626  | 2 | 3.0  | 102 | 115 | No |  |  |  |  |
|     |                          |      |                                                                          | AIEMLGGELGSK                                                                                                                               | R | I | 95.00% | 75  | M4: Oxidation                  | 610.8151  | 2 | 2.1  | 161 | 172 | No |  |  |  |  |
|     |                          |      |                                                                          | AIEMLGGELGSK                                                                                                                               | R | I | 95.00% | 71  |                                | 602.8193  | 2 | 4.8  | 161 | 172 | No |  |  |  |  |
|     |                          |      |                                                                          | ETAIELGYLTAEQFDEWVKPK                                                                                                                      | K | D | 95.00% | 117 |                                | 1234.1350 | 2 | 9.2  | 484 | 504 | No |  |  |  |  |
|     |                          |      |                                                                          | ETAIELGYLTAEQFDEWVKPK                                                                                                                      | K | D | 95.00% | 38  |                                | 823.0906  | 3 | 6.7  | 484 | 504 | No |  |  |  |  |
|     |                          |      |                                                                          | IEYDTFGELK                                                                                                                                 | R | V | 95.00% | 68  |                                | 607.8038  | 2 | 4.3  | 52  | 61  | No |  |  |  |  |
|     |                          |      |                                                                          | IEYDTFGELKVPNDK                                                                                                                            | R | Y | 95.00% | 59  |                                | 884.4515  | 2 | 8.2  | 52  | 66  | No |  |  |  |  |
|     |                          |      |                                                                          | IEYDTFGELKVPNDKYGAQTVR                                                                                                                     | R | S | 95.00% | 47  |                                | 902.7932  | 3 | 8.3  | 52  | 74  | No |  |  |  |  |
|     |                          |      |                                                                          | IYELAAGGTAVGTGLNTR                                                                                                                         | R | I | 95.00% | 124 |                                | 882.4745  | 2 | 6.7  | 269 | 286 | No |  |  |  |  |
|     |                          |      |                                                                          | IYELAAGGTAVGTGLNTR                                                                                                                         | R | I | 95.00% | 75  |                                | 588.6513  | 3 | 5.1  | 269 | 286 | No |  |  |  |  |
|     |                          |      |                                                                          | LMNESLMLVTALNPHIGYDK                                                                                                                       | K | A | 95.00% | 82  | M2: Oxidation, M7: Oxidation   | 1146.0840 | 2 | 8.2  | 448 | 467 | No |  |  |  |  |
|     |                          |      |                                                                          | LMNESLMLVTALNPHIGYDK                                                                                                                       | K | A | 95.00% | 70  | M2: Oxidation, M7: Oxidation   | 764.3906  | 3 | 6.3  | 448 | 467 | No |  |  |  |  |
|     |                          |      |                                                                          | LNDHFPLVVWQTGSGTQTNMN                                                                                                                      |   |   |        |     |                                |           |   |      |     |     |    |  |  |  |  |
|     |                          |      |                                                                          | VNEVISNR                                                                                                                                   | K | A | 95.00% | 72  | M20: Oxidation                 | 1096.2090 | 3 | 5.7  | 132 | 160 | No |  |  |  |  |
|     |                          |      |                                                                          | MPTPVIK                                                                                                                                    | R | A | 95.00% | 30  | M1: Oxidation                  | 401.2324  | 2 | 3.0  | 88  | 94  | No |  |  |  |  |

|     |                                       |          |                                                                         |                                                                                     |   |   |        |     |                                  |           |   |     |     |     |    |
|-----|---------------------------------------|----------|-------------------------------------------------------------------------|-------------------------------------------------------------------------------------|---|---|--------|-----|----------------------------------|-----------|---|-----|-----|-----|----|
|     |                                       |          |                                                                         | SGLGELILPENEPGSSIMPVK                                                               | R | V | 95.00% | 79  | M18: Oxidation                   | 1071.0520 | 2 | 7.5 | 351 | 371 | No |
|     |                                       |          |                                                                         | SGLGELILPENEPGSSIMPVK                                                               | R | V | 95.00% | 43  | M18: Oxidation                   | 714.3710  | 3 | 8.0 | 351 | 371 | No |
|     |                                       |          |                                                                         | SKEFAQIK                                                                            | K | I | 95.00% | 38  |                                  | 532.3138  | 2 | 4.2 | 222 | 230 | No |
|     |                                       |          |                                                                         | THTQDAVPLTLGQEFSGYVQQV                                                              | K |   |        |     |                                  |           |   |     |     |     |    |
|     |                                       |          |                                                                         | THTQDAVPLTLGQEFSGYVQQV                                                              | R | Y | 95.00% | 79  |                                  | 1273.6610 | 2 | 9.8 | 234 | 256 | No |
|     |                                       |          |                                                                         | K                                                                                   |   |   |        |     |                                  |           |   |     |     |     |    |
|     |                                       |          |                                                                         | VAALTLGLPFVTAPNK                                                                    | R | Y | 95.00% | 62  |                                  | 849.4390  | 3 | 4.9 | 234 | 256 | No |
|     |                                       |          |                                                                         | K                                                                                   | F |   |        |     |                                  | 749.9402  | 2 | 6.1 | 297 | 311 | No |
|     |                                       |          |                                                                         | VPNDKYYGAQTVR                                                                       | K | S | 95.00% | 37  |                                  | 755.8888  | 2 | 2.8 | 62  | 74  | No |
|     |                                       |          |                                                                         | VPNDKYYGAQTVR                                                                       | K | S | 95.00% | 32  |                                  | 504.2620  | 3 | 3.3 | 62  | 74  | No |
|     |                                       |          |                                                                         | YYGAQTVR                                                                            | K | S | 95.00% | 42  |                                  | 479.2469  | 2 | 6.9 | 67  | 74  | No |
|     |                                       |          |                                                                         | UNCHARACTERIZED PROTEIN C10ORF58<br>PRECURSOR.; 25 KDA PROTEIN.; 24 KDA<br>PROTEIN. |   |   |        |     |                                  |           |   |     |     |     |    |
| 412 | IPI00296190; IPI00646289; IPI00646889 | C10orf58 |                                                                         | AALEYLEDIDLK                                                                        | K | T | 95.00% | 62  |                                  | 696.8729  | 2 | 8.3 | 44  | 55  | No |
|     |                                       |          |                                                                         | VNLLSVLEAAK                                                                         | K | M | 95.00% | 82  |                                  | 578.8550  | 2 | 6.9 | 207 | 217 | No |
| 413 | IPI00296635                           | GBE1     | 1,4-ALPHA-GLUCAN BRANCHING ENZYME.                                      | FLLSNIR                                                                             | R | W | 95.00% | 37  |                                  | 431.7624  | 2 | 2.3 | 337 | 343 | No |
|     |                                       |          |                                                                         | IVLSDAAEYGGHOR                                                                      | K | L | 95.00% | 117 |                                  | 815.8980  | 2 | 3.4 | 648 | 662 | No |
|     |                                       |          |                                                                         | IYESHVGISSHEGK                                                                      | R | V | 95.00% | 43  |                                  | 514.9260  | 3 | 4.4 | 199 | 212 | No |
|     |                                       |          |                                                                         | LLEIDPYLKPYAVDFQR                                                                   | R | R | 95.00% | 51  |                                  | 1040.5660 | 2 | 5.5 | 31  | 47  | No |
|     |                                       |          |                                                                         | LLEIDPYLKPYAVDFQR                                                                   | R | R | 95.00% | 45  |                                  | 694.0467  | 3 | 6.0 | 31  | 47  | No |
|     |                                       |          |                                                                         | RQFHLLTDDLLR                                                                        | R | Y | 95.00% | 32  |                                  | 510.2706  | 3 | 5.7 | 565 | 576 | No |
|     |                                       |          |                                                                         | VALILQNVDLPN                                                                        | R | - | 95.00% | 53  |                                  | 654.8829  | 2 | 3.8 | 691 | 702 | No |
|     |                                       |          |                                                                         | YGWLAAPQAYVSEK                                                                      | R | H | 95.00% | 44  |                                  | 791.9059  | 2 | 8.6 | 594 | 607 | No |
| 414 | IPI00297779                           | CCT2     | T-COMPLEX PROTEIN 1 SUBUNIT BETA.                                       | AAHSEGNNTAGLDMR                                                                     | R | E | 95.00% | 42  | M14: Oxidation                   | 516.2401  | 3 | 8.1 | 467 | 481 | No |
|     |                                       |          |                                                                         | DASLMVTNDGATILK                                                                     | R | N | 95.00% | 49  | M5: Oxidation                    | 782.8999  | 2 | 1.6 | 58  | 72  | No |
|     |                                       |          |                                                                         | EALLSSAVDHGSDEVK                                                                    | R | F | 95.00% | 61  |                                  | 828.9111  | 2 | 3.8 | 139 | 154 | No |
|     |                                       |          |                                                                         | GATQQILDEAER                                                                        | R | S | 95.00% | 93  |                                  | 665.8374  | 2 | 5.0 | 377 | 388 | No |
|     |                                       |          |                                                                         | ILIAANTGMDTDKIK                                                                     | K | I | 95.00% | 36  | M8: Oxidation                    | 774.9236  | 2 | 5.4 | 237 | 250 | No |
|     |                                       |          |                                                                         | LALVTGGIEIASTFDHPPELVK                                                              | R | L | 95.00% | 39  |                                  | 699.7162  | 3 | 4.5 | 323 | 342 | No |
|     |                                       |          |                                                                         | LAVEAVLR                                                                            | K | L | 95.00% | 58  |                                  | 435.7756  | 2 | 2.4 | 182 | 189 | No |
|     |                                       |          |                                                                         | LGGSLADSYLDEGFLDKK                                                                  | K | I | 95.00% | 56  |                                  | 681.0264  | 3 | 6.8 | 205 | 223 | No |
|     |                                       |          |                                                                         | LIEEVIGEDK                                                                          | K | L | 95.00% | 51  | M6: Oxidation                    | 646.3289  | 2 | 3.3 | 348 | 358 | No |
|     |                                       |          |                                                                         | LTSFIGAIAIGDLVK                                                                     | R | S | 95.00% | 89  |                                  | 759.4557  | 2 | 5.9 | 26  | 40  | No |
|     |                                       |          |                                                                         | MLPTIADNAGYDSADLVAQLR                                                               | R | A | 95.00% | 53  | M1: Oxidation                    | 788.4066  | 3 | 5.4 | 445 | 466 | No |
|     |                                       |          |                                                                         | VQDDEVGDGTTSVTLAAELLR                                                               | R | E | 95.00% | 74  |                                  | 763.3974  | 3 | 6.2 | 90  | 111 | No |
| 415 | IPI00298423                           | PDHX     | PYRUVATE DEHYDROGENASE PROTEIN X<br>COMPONENT, MITOCHONDRIAL PRECURSOR. | ANLENPIR                                                                            | K | L | 95.00% | 61  |                                  | 463.7578  | 2 | 2.0 | 492 | 499 | No |
|     |                                       |          |                                                                         | GIQEIADSVK                                                                          | K | A | 95.00% | 42  |                                  | 1059.5760 | 1 | 6.3 | 385 | 394 | No |
|     |                                       |          |                                                                         | GIQEIADSVK                                                                          | K | A | 95.00% | 69  |                                  | 530.2906  | 2 | 4.3 | 385 | 394 | No |
|     |                                       |          |                                                                         | GLLTPIIK                                                                            | K | D | 95.00% | 28  |                                  | 854.5787  | 1 | 8.2 | 372 | 379 | No |
|     |                                       |          |                                                                         | GLLTPIIK                                                                            | K | D | 95.00% | 34  |                                  | 427.7912  | 2 | 3.4 | 372 | 379 | No |
|     |                                       |          |                                                                         | HSLDASOGTATGPR                                                                      | K | G | 95.00% | 74  |                                  | 699.3492  | 2 | 9.4 | 195 | 208 | No |
|     |                                       |          |                                                                         | HSLDASOGTATGPR                                                                      | K | G | 95.00% | 49  |                                  | 466.5651  | 3 | 1.6 | 195 | 208 | No |
|     |                                       |          |                                                                         | ILMPSLSPTMEEGNIVK                                                                   | K | W | 95.00% | 55  | M3: Oxidation,<br>M10: Oxidation | 945.9890  | 2 | 7.7 | 59  | 75  | No |
|     |                                       |          |                                                                         | ITERSPTPAPTATPTAPSPLQAT                                                             |   |   |        |     |                                  |           |   |     |     |     |    |
|     |                                       |          |                                                                         | AGPSYPR                                                                             | K | P | 95.00% | 61  |                                  | 1011.8660 | 3 | 5.6 | 228 | 257 | No |
|     |                                       |          |                                                                         | LGSLIGLIVEEGEDWK                                                                    | R | H | 95.00% | 103 |                                  | 879.4787  | 2 | 9.4 | 124 | 139 | No |
|     |                                       |          |                                                                         | LGSLIGLIVEEGEDWK                                                                    | R | H | 95.00% | 53  |                                  | 586.6528  | 3 | 5.5 | 124 | 139 | No |
|     |                                       |          |                                                                         | PSEPRPSPEPQISIPVKK                                                                  | K | E | 95.00% | 35  |                                  | 662.7089  | 3 | 4.3 | 156 | 173 | No |
|     |                                       |          |                                                                         | PSPEPQISIPVKK                                                                       | R | E | 95.00% | 40  |                                  | 473.9490  | 3 | 7.1 | 161 | 173 | No |
|     |                                       |          |                                                                         | QLITVMSSSDR                                                                         | R | V | 95.00% | 55  | M7: Oxidation                    | 677.3430  | 2 | 7.2 | 465 | 476 | No |
|     |                                       |          |                                                                         | QMPDVNVSWDGEQPK                                                                     | K | Q | 95.00% | 68  | M2: Oxidation                    | 837.8794  | 2 | 4.4 | 342 | 356 | No |
|     |                                       |          |                                                                         | VSVNDFIHK                                                                           | K | A | 95.00% | 42  |                                  | 517.8004  | 2 | 4.0 | 326 | 334 | No |
|     |                                       |          |                                                                         | VVDDELATR                                                                           | R | F | 95.00% | 61  |                                  | 509.2661  | 2 | 2.6 | 477 | 485 | No |
| 416 | IPI00298547                           | PARK7    | PROTEIN DJ-1.                                                           | ALVILAK                                                                             | R | G | 95.00% | 25  |                                  | 727.5149  | 1 | 9.1 | 6   | 12  | No |
|     |                                       |          |                                                                         | DGLILTSR                                                                            | K | G | 95.00% | 58  |                                  | 437.7576  | 2 | 8.5 | 149 | 156 | No |
|     |                                       |          |                                                                         | EGPYDVVVLPGGNLGAQNLSES                                                              |   |   |        |     |                                  |           |   |     |     |     |    |
|     |                                       |          |                                                                         | AAVK                                                                                | K | E | 95.00% | 72  |                                  | 862.1218  | 3 | 9.3 | 64  | 89  | No |
|     |                                       |          |                                                                         | GAEEMETVIPVDVMR                                                                     | K | R | 95.00% | 66  | M5: Oxidation,<br>M14: Oxidation | 854.4066  | 2 | 6.9 | 13  | 27  | No |
|     |                                       |          |                                                                         | GAEEMETVIPVDVMR                                                                     | K | R | 95.00% | 55  |                                  | 838.4136  | 2 | 9.3 | 13  | 27  | No |
|     |                                       |          |                                                                         | GPGTSFEFALAIVEALNGK                                                                 | R | E | 95.00% | 134 |                                  | 961.0168  | 2 | 9.7 | 157 | 175 | No |
|     |                                       |          |                                                                         | GPGTSFEFALAIVEALNGK                                                                 | R | E | 95.00% | 50  |                                  | 641.0134  | 3 | 9.0 | 157 | 175 | No |
|     |                                       |          |                                                                         | VTTTHPLAK                                                                           | K | D | 95.00% | 32  |                                  | 433.7614  | 2 | 5.7 | 123 | 130 | No |
|     |                                       |          |                                                                         | VTVAGLAGK                                                                           | K | D | 95.00% | 32  |                                  | 408.2570  | 2 | 8.5 | 33  | 41  | No |
| 417 | IPI00298933                           | CASQ2    | CALSEQUESTRIN-2 PRECURSOR.                                              | AFEEAAEHFQPYIK                                                                      | K | F | 95.00% | 62  |                                  | 840.4156  | 2 | 9.7 | 181 | 194 | No |
|     |                                       |          |                                                                         | AIGFVMVDAK                                                                          | K | K | 95.00% | 48  | M6: Oxidation                    | 1066.5640 | 1 | 2.6 | 88  | 97  | No |
|     |                                       |          |                                                                         | AIGFVMVDAK                                                                          | K | K | 95.00% | 71  | M6: Oxidation                    | 533.7858  | 2 | 2.9 | 88  | 97  | No |

|     |                                                                 |       |                                        |                                                                                                     |   |   |        |     |                |           |     |     |      |      |     |
|-----|-----------------------------------------------------------------|-------|----------------------------------------|-----------------------------------------------------------------------------------------------------|---|---|--------|-----|----------------|-----------|-----|-----|------|------|-----|
|     |                                                                 |       |                                        | EIVLELVAQVLEHK                                                                                      | K | A | 95.00% | 104 |                | 810.4772  | 2   | 5.7 | 74   | 87   | No  |
|     |                                                                 |       |                                        | EIVLELVAQVLEHK                                                                                      | K | A | 95.00% | 43  |                | 540.6534  | 3   | 4.5 | 74   | 87   | No  |
|     |                                                                 |       |                                        | FFATFDK                                                                                             | K | G | 95.00% | 30  |                | 875.4331  | 1   | 3.1 | 195  | 201  | No  |
|     |                                                                 |       |                                        | FFATFDK                                                                                             | K | G | 95.00% | 35  |                | 438.2207  | 2   | 3.7 | 195  | 201  | No  |
|     |                                                                 |       |                                        | KLGFDEEGSLYILK                                                                                      | K | G | 95.00% | 84  |                | 806.4407  | 2   | 6.2 | 105  | 118  | No  |
|     |                                                                 |       |                                        | KLGFDEEGSLYILK                                                                                      | K | G | 95.00% | 58  |                | 537.9611  | 3   | 2.4 | 105  | 118  | No  |
|     |                                                                 |       |                                        | KLGFDEEGSLYILK                                                                                      | K | T | 95.00% | 57  |                | 647.3483  | 3   | 8.2 | 105  | 121  | No  |
|     |                                                                 |       |                                        | LEVQAFER                                                                                            | K | I | 95.00% | 69  |                | 496.2674  | 2   | 5.8 | 153  | 160  | No  |
|     |                                                                 |       |                                        | LGFDDEEGSLYILK                                                                                      | K | G | 95.00% | 82  |                | 742.3929  | 2   | 6.3 | 106  | 118  | No  |
|     |                                                                 |       |                                        | MNEVDYFYPFMDEPIAIPNKPYT                                                                             |   |   |        |     |                |           |     |     |      |      |     |
|     |                                                                 |       |                                        | EEELVEFVK                                                                                           | K | E | 95.00% | 56  | M1: Oxidation, | 1298.9490 | 3   | 7.3 | 211  | 242  | No  |
|     |                                                                 |       |                                        | QVLKK                                                                                               | K | Y | 95.00% | 30  | M11: Oxidation | 615.4246  | 1   | 8.2 | 44   | 48   | No  |
|     |                                                                 |       |                                        | SDPDGYEFLEILK                                                                                       | K | Q | 95.00% | 81  |                | 763.3804  | 2   | 6.6 | 277  | 289  | No  |
| 418 | IPI00298961; IPI00784388                                        | XPO1  | EXPORTIN-1.; 123 KDA PROTEIN.          | AIIASNIMYIVGQYPR                                                                                    | K | F | 95.00% | 43  | M8: Oxidation  | 608.9981  | 3   | 5.8 | 538  | 553  | No  |
|     |                                                                 |       |                                        | EFAGEDTSDLFEER                                                                                      | K | E | 95.00% | 110 |                | 879.4038  | 2   | 7.2 | 1024 | 1038 | No  |
|     |                                                                 |       |                                        | EPEVLSTMAIVNK                                                                                       | R | L | 95.00% | 57  | M8: Oxidation  | 780.4288  | 2   | 9.2 | 797  | 810  | No  |
|     |                                                                 |       |                                        | ETLVYLTHLDYVDTER                                                                                    | R | I | 95.00% | 43  |                | 983.9978  | 2   | 5.8 | 459  | 474  | No  |
|     |                                                                 |       |                                        | ETLVYLTHLDYVDTER                                                                                    | R | I | 95.00% | 34  |                | 656.3360  | 3   | 8.1 | 459  | 474  | No  |
|     |                                                                 |       |                                        | MAKPEEVLVENDQGVEVVR                                                                                 | R | E | 95.00% | 48  | M1: Oxidation  | 719.7064  | 3   | 8.0 | 424  | 442  | No  |
|     |                                                                 |       |                                        | MAQEVLTHLK                                                                                          | R | E | 95.00% | 29  | M1: Oxidation  | 593.3226  | 2   | 5.9 | 45   | 54   | No  |
|     |                                                                 |       |                                        | SAFPHLQDAQVK                                                                                        | K | L | 95.00% | 49  |                | 670.8581  | 2   | 9.0 | 984  | 995  | No  |
|     |                                                                 |       |                                        | YYGLQILENVIK                                                                                        | K | T | 95.00% | 78  |                | 726.9108  | 2   | 2.4 | 77   | 88   | No  |
|     |                                                                 |       |                                        | PROLIFERATION-ASSOCIATED PROTEIN 2G4.; 41 KDA PROTEIN.; HYPOTHETICAL PROTEIN (FRAGMENT).            |   |   |        |     |                |           |     |     |      |      |     |
| 419 | IPI00299000; IPI00794875; IPI00807557                           | PA2G4 |                                        | EGEFVAQFK                                                                                           | K | F | 95.00% | 39  |                | 527.7659  | 2   | 2.8 | 342  | 350  | No  |
|     |                                                                 |       |                                        | FDAMPFTLR                                                                                           | R | A | 95.00% | 34  | M4: Oxidation  | 557.2762  | 2   | 3.7 | 303  | 311  | No  |
|     |                                                                 |       |                                        | FTVLLMPNGPMR                                                                                        | K | I | 95.00% | 42  | M6: Oxidation, |           |     |     |      |      |     |
|     |                                                                 |       |                                        | HELLQPFNVLYEK                                                                                       | K | E | 95.00% | 50  | M11: Oxidation | 704.3635  | 2   | 4.3 | 351  | 362  | No  |
|     |                                                                 |       |                                        | ITSGPFEPDLYK                                                                                        | R | S | 95.00% | 70  |                | 543.9620  | 3   | 3.7 | 329  | 341  | No  |
|     |                                                                 |       |                                        | SEMVEQDAELK                                                                                         | K | A | 95.00% | 58  |                | 683.8518  | 2   | 4.6 | 363  | 374  | No  |
|     |                                                                 |       |                                        | TAENATSGETLEENEAGD                                                                                  | K | - | 95.00% | 104 | M3: Oxidation  | 647.8002  | 2   | 6.8 | 345  | 355  | No  |
|     |                                                                 |       |                                        | TIQNPDTQQK                                                                                          | K | K | 95.00% | 55  |                | 919.3884  | 2   | 6.1 | 377  | 394  | No  |
| 420 | IPI00299033                                                     | KPNA3 | IMPORTIN ALPHA-3 SUBUNIT.              | DSQVQVVLVLDGLK                                                                                      | K | N | 95.00% | 71  |                | 643.3442  | 2   | 4.0 | 200  | 210  | No  |
|     |                                                                 |       |                                        | EAAWAISNLTISGR                                                                                      | K | K | 95.00% | 92  |                | 700.3982  | 2   | 6.3 | 424  | 436  | No  |
|     |                                                                 |       |                                        | IEVLQQHENEDIYK                                                                                      | K | L | 95.00% | 69  |                | 744.9005  | 2   | 8.1 | 387  | 400  | Yes |
|     |                                                                 |       |                                        | KLLSSDRNPPIDDLIK                                                                                    | R | S | 95.00% | 27  |                | 879.4453  | 2   | 6.6 | 462  | 475  | No  |
|     |                                                                 |       |                                        | LLSSDRNPPIDDLIK                                                                                     | K | S | 95.00% | 55  |                | 608.6829  | 3   | 5.2 | 97   | 112  | Yes |
|     |                                                                 |       |                                        | NPPIDDLIK                                                                                           | R | S | 95.00% | 39  |                | 848.4745  | 2   | 7.6 | 98   | 112  | Yes |
|     |                                                                 |       |                                        | NVPQEESSLESDVDADFK                                                                                  | R | A | 95.00% | 100 |                | 512.7897  | 2   | 3.3 | 104  | 112  | Yes |
|     |                                                                 |       |                                        | SGILPILVK                                                                                           | K | C | 95.00% | 49  |                | 1018.9570 | 2   | 6.1 | 50   | 67   | No  |
|     |                                                                 |       |                                        | PROTEASOME SUBUNIT ALPHA TYPE 4.; PSMA4 PROTEIN.; 25 KDA PROTEIN.; 27 KDA PROTEIN.; 26 KDA PROTEIN. |   |   |        |     |                |           |     |     |      |      |     |
| 421 | IPI00299155; IPI00789638; IPI00790038; IPI00790207; IPI00795606 | PSMA4 |                                        | LLDEVFFSEK                                                                                          | K | I | 95.00% | 69  |                | 470.3182  | 2   | 4.4 | 113  | 121  | No  |
|     |                                                                 |       |                                        | LSAEKVEIATLTR                                                                                       | K | E | 95.00% | 34  |                | 613.8234  | 2   | 6.6 | 31   | 40   | No  |
|     |                                                                 |       |                                        | VEIATLTR                                                                                            | K | E | 95.00% | 46  |                | 477.6139  | 3   | 2.7 | 182  | 194  | No  |
|     |                                                                 |       |                                        |                                                                                                     |   |   |        |     | 451.7710       | 2         | 3.2 | 211 | 218  | No   |     |
| 422 | IPI00299456                                                     | FBP2  | FRUCTOSE-1,6-BISPHOSPHATASE ISOZYME 2. | AGLAHLYGIAGSVNVTGDEVK                                                                               | K | K | 95.00% | 73  |                | 691.0383  | 3   | 8.3 | 52   | 72   | No  |
|     |                                                                 |       |                                        | FPEDGSAPYGAR                                                                                        | K | Y | 95.00% | 33  |                | 633.7954  | 2   | 5.8 | 233  | 244  | No  |
|     |                                                                 |       |                                        | GTGELTQLLNSMLTAIK                                                                                   | K | A | 95.00% | 68  | M12: Oxidation | 903.4950  | 2   | 7.5 | 27   | 43   | No  |
|     |                                                                 |       |                                        | GTGELTQLLNSMLTAIK                                                                                   | K | A | 95.00% | 41  | M12: Oxidation | 602.6655  | 3   | 6.8 | 27   | 43   | No  |
|     |                                                                 |       |                                        | GTGELTQLLNSMLTAIK                                                                                   | K | A | 95.00% | 102 |                | 895.4980  | 2   | 8.0 | 27   | 43   | No  |
|     |                                                                 |       |                                        | GTGELTQLLNSMLTAIK                                                                                   | K | A | 95.00% | 44  |                | 597.3341  | 3   | 7.2 | 27   | 43   | No  |
|     |                                                                 |       |                                        | IYSLNEGYAK                                                                                          | K | Y | 95.00% | 41  |                | 1157.5940 | 1   | 8.2 | 209  | 218  | No  |
|     |                                                                 |       |                                        | IYSLNEGYAK                                                                                          | K | Y | 95.00% | 64  |                | 579.2982  | 2   | 3.6 | 209  | 218  | No  |
|     |                                                                 |       |                                        | KAGLAHLYGIAGSVNVTGDEVK                                                                              | R | K | 95.00% | 71  |                | 733.7369  | 3   | 8.1 | 51   | 72   | No  |
|     |                                                                 |       |                                        | KFPEDGSAPYGAR                                                                                       | K | Y | 95.00% | 76  |                | 697.8433  | 2   | 6.0 | 232  | 244  | No  |
|     |                                                                 |       |                                        | KFPEDGSAPYGAR                                                                                       | K | Y | 95.00% | 35  |                | 465.5639  | 3   | 3.9 | 232  | 244  | No  |
|     |                                                                 |       |                                        | KKFPEDGSAPYGAR                                                                                      | K | Y | 95.00% | 59  |                | 761.8931  | 2   | 8.4 | 231  | 244  | No  |
|     |                                                                 |       |                                        | KKFPEDGSAPYGAR                                                                                      | K | Y | 95.00% | 36  |                | 508.2631  | 3   | 5.5 | 231  | 244  | No  |
|     |                                                                 |       |                                        | SPFETDMLTLTR                                                                                        | R | Y | 95.00% | 90  | M7: Oxidation  | 713.8551  | 2   | 9.3 | 5    | 16   | No  |
|     |                                                                 |       |                                        | SPFETDMLTLTR                                                                                        | R | Y | 95.00% | 74  |                | 705.8574  | 2   | 9.0 | 5    | 16   | No  |
|     |                                                                 |       |                                        | TLVYGGIFLYPANQK                                                                                     | R | S | 95.00% | 99  |                | 842.4657  | 2   | 7.3 | 256  | 270  | No  |
|     |                                                                 |       |                                        | YFDAATTEYVQK                                                                                        | K | K | 95.00% | 68  |                | 718.3448  | 2   | 4.9 | 219  | 230  | No  |
|     |                                                                 |       |                                        | YFDAATTEYVQK                                                                                        | K | K | 95.00% | 94  |                | 782.3928  | 2   | 5.2 | 219  | 231  | No  |
|     |                                                                 |       |                                        | YVGSMAVDVHR                                                                                         | R | T | 95.00% | 66  | M5: Oxidation  | 625.3064  | 2   | 4.0 | 245  | 255  | No  |
|     |                                                                 |       |                                        | YVGSMAVDVHR                                                                                         | R | T | 95.00% | 33  | M5: Oxidation  | 417.2066  | 3   | 3.4 | 245  | 255  | No  |

| Accession              | Gene                     | Protein | Start                                                                                                                                      | End                     | Score          | Length   | Modifications                        | Mass                  | Charge         | Abundance | Abundance | Abundance | Abundance | Abundance | Abundance |    |     |
|------------------------|--------------------------|---------|--------------------------------------------------------------------------------------------------------------------------------------------|-------------------------|----------------|----------|--------------------------------------|-----------------------|----------------|-----------|-----------|-----------|-----------|-----------|-----------|----|-----|
| 423                    | IPI00299608; IPI00456695 | PSMD1   | ISOFORM 1 OF 26S PROTEASOME NON-ATPASE REGULATORY SUBUNIT 1.; ISOFORM 2 OF 26S PROTEASOME NON-ATPASE REGULATORY SUBUNIT 1.                 | AAVESLGFILFR            | R              | T        | 95.00%                               | 80                    |                |           | 661.8824  | 2         | 7.3       | 617       | 628       | No |     |
|                        |                          |         |                                                                                                                                            | DTSEDIELVEPVAAHGPK      | K              | I        | 95.00%                               | 47                    |                |           | 679.3360  | 3         | 4.7       | 916       | 934       | No |     |
|                        |                          |         |                                                                                                                                            | EALQLMATYLPK            | K              | D        | 95.00%                               | 29                    | M6: Oxidation  | 697.3792  | 2         | 7.4       | 418       | 429       | No        |    |     |
|                        |                          |         |                                                                                                                                            | FTATASLGVIIK            | K              | G        | 95.00%                               | 50                    |                | 622.8549  | 2         | 1.3       | 402       | 413       | No        |    |     |
|                        |                          |         |                                                                                                                                            | FTATASLGVIIK            | K              | G        | 95.00%                               | 40                    |                | 415.5739  | 3         | 4.5       | 402       | 413       | No        |    |     |
|                        |                          |         |                                                                                                                                            | GLAVGIALVMYGR           | R              | M        | 95.00%                               | 39                    | M10: Oxidation | 668.3822  | 2         | 8.0       | 547       | 559       | No        |    |     |
|                        |                          |         |                                                                                                                                            | HGSSLGLGLAAMGTAR        | R              | Q        | 95.00%                               | 44                    | M12: Oxidation | 495.5957  | 3         | 4.7       | 475       | 490       | No        |    |     |
|                        |                          |         |                                                                                                                                            | KKEPEPNFQLLDNPAR        | K              | V        | 95.00%                               | 61                    |                | 632.6743  | 3         | 4.8       | 868       | 883       | No        |    |     |
|                        |                          |         |                                                                                                                                            | LLHVAVSDVNDVRR          | R              | A        | 95.00%                               | 42                    |                | 569.9790  | 3         | 4.2       | 602       | 616       | No        |    |     |
|                        |                          |         |                                                                                                                                            | LLHVAVSDVNDVRR          | R              | A        | 95.00%                               | 33                    |                | 427.7361  | 4         | 3.9       | 602       | 616       | No        |    |     |
|                        |                          |         |                                                                                                                                            | QDVYDLLK                | R              | T        | 95.00%                               | 28                    |                | 497.2690  | 2         | 4.4       | 491       | 498       | No        |    |     |
|                        |                          |         |                                                                                                                                            | TILESNVPGMLAYSLK        | K              | L        | 95.00%                               | 70                    | M11: Oxidation | 933.9862  | 2         | 6.3       | 166       | 182       | No        |    |     |
|                        |                          |         |                                                                                                                                            | TVGTPIASVPGSTNTGTVPGSEK | R              | T        | 95.00%                               | 38                    | M28: Oxidation | 1108.8550 | 3         | 6.2       | 270       | 302       | No        |    |     |
|                        |                          |         |                                                                                                                                            | DSDSMETEEK              | K              | I        | 95.00%                               | 37                    | M8: Oxidation  | 585.5382  | 4         | 7.0       | 88        | 108       | No        |    |     |
|                        |                          |         |                                                                                                                                            | 424                     | IPI00299977    | PHPT1    | 14 KDA PHOSPHOHISTIDINE PHOSPHATASE. | IHYVGYSMAYGPAQHAISTEK | K              | I         | 95.00%    | 37        |           |           | 585.5382  | 4  | 7.0 |
| KIHVYGYSMAYGPAQHAISTEK | K                        | I       | 95.00%                                                                                                                                     |                         |                |          |                                      | 44                    | M9: Oxidation  | 823.0818  | 3         | 8.7       | 87        | 108       | No        |    |     |
| KIHVYGYSMAYGPAQHAISTEK | K                        | I       | 95.00%                                                                                                                                     |                         |                |          |                                      | 30                    | M9: Oxidation  | 617.5622  | 4         | 6.9       | 87        | 108       | No        |    |     |
| 425                    | IPI00300074              | FARSB   | PHENYLALANYL-TRNA SYNTHETASE BETA CHAIN.                                                                                                   | WAEYHADIYDK             | K              | V        | 95.00%                               | 67                    |                |           | 705.8271  | 2         | 9.4       | 49        | 59        | No |     |
|                        |                          |         |                                                                                                                                            | AAGASDVVLYK             | K              | I        | 95.00%                               | 34                    |                | 547.3008  | 2         | 3.9       | 54        | 64        | No        |    |     |
|                        |                          |         |                                                                                                                                            | DLLFQALGR               | R              | T        | 95.00%                               | 54                    |                | 516.7983  | 2         | 4.1       | 9         | 17        | No        |    |     |
|                        |                          |         |                                                                                                                                            | DRYDSFIELQEK            | K              | L        | 95.00%                               | 43                    |                | 771.8793  | 2         | 4.2       | 134       | 145       | No        |    |     |
|                        |                          |         |                                                                                                                                            | LFEISDIVIK              | K              | D        | 95.00%                               | 41                    |                | 588.8518  | 2         | 6.4       | 474       | 483       | No        |    |     |
|                        |                          |         |                                                                                                                                            | LGVLHPDVITK             | K              | F        | 95.00%                               | 29                    |                | 596.3601  | 2         | 1.6       | 561       | 571       | No        |    |     |
|                        |                          |         |                                                                                                                                            | NPGFIIHGLLDR            | K              | I        | 95.00%                               | 48                    |                | 740.9041  | 2         | 6.0       | 505       | 517       | No        |    |     |
|                        |                          |         |                                                                                                                                            | TYTIANQFPLNK            | K              | L        | 95.00%                               | 73                    |                | 705.3787  | 2         | 4.6       | 384       | 395       | No        |    |     |
| 426                    | IPI00300285; IPI00783874 | HDHD2   | 29 KDA PROTEIN.; HALOACID DEHALOGENASE-LIKE HYDROLASE DOMAIN CONTAINING 2.                                                                 | LLLDGAPLIAHK            | R              | A        | 95.00%                               | 41                    |                |           | 458.6260  | 3         | 7.2       | 140       | 152       | No |     |
|                        |                          |         |                                                                                                                                            | TFFLEALR                | K              | G        | 95.00%                               | 60                    |                | 498.7814  | 2         | 3.1       | 183       | 190       | No        |    |     |
| 427                    | IPI00300567; IPI00398758 | DCI     | ISOFORM 1 OF 3,2-TRANS-ENOYL-COA ISOMERASE, MITOCHONDRIAL PRECURSOR.; ISOFORM 2 OF 3,2-TRANS-ENOYL-COA ISOMERASE, MITOCHONDRIAL PRECURSOR. | AVQELWLR                | K              | L        | 95.00%                               | 45                    |                |           | 507.7939  | 2         | 6.3       | 127       | 134       | No |     |
|                        |                          |         |                                                                                                                                            | DADVQNFVSFISK           | R              | D        | 95.00%                               | 91                    |                | 735.3746  | 2         | 9.4       | 271       | 283       | No        |    |     |
|                        |                          |         |                                                                                                                                            | DTLENTIGHR              | K              | A        | 95.00%                               | 32                    |                | 578.2956  | 2         | 6.3       | 174       | 183       | No        |    |     |
|                        |                          |         |                                                                                                                                            | SLQMYLER                | K              | L        | 95.00%                               | 45                    | M4: Oxidation  | 528.2662  | 2         | 4.7       | 272       | 279       | No        |    |     |
|                        |                          |         |                                                                                                                                            | VLVEPDAGAGVAVMK         | R              | F        | 95.00%                               | 72                    | M14: Oxidation | 736.4020  | 2         | 9.0       | 47        | 61        | No        |    |     |
|                        |                          |         |                                                                                                                                            | VLVEPDAGAGVAVMK         | R              | F        | 95.00%                               | 64                    | M14: Oxidation | 491.2692  | 3         | 6.1       | 47        | 61        | No        |    |     |
|                        |                          |         |                                                                                                                                            | VLVEPDAGAGVAVMK         | R              | F        | 95.00%                               | 69                    |                | 728.4028  | 2         | 6.6       | 47        | 61        | No        |    |     |
|                        |                          |         |                                                                                                                                            | ALMPALEELTFDPSSAHPSLVVS | R              | R        | 95.00%                               | 68                    | M3: Oxidation  | 938.8137  | 3         | 9.6       | 283       | 309       | No        |    |     |
| 428                    | IPI00301028              | TRIM72  | ISOFORM 1 OF TRIPARTITE MOTIF-CONTAINING PROTEIN 72.                                                                                       | SSGR                    | R              | R        | 95.00%                               | 68                    |                |           | 973.8220  | 3         | 3.9       | 331       | 356       | No |     |
|                        |                          |         |                                                                                                                                            | AVAVVAHQQLSEGEHYWEVDV   | K              | W        | 95.00%                               | 53                    |                |           |           |           |           |           |           |    |     |
|                        |                          |         |                                                                                                                                            | GDKPR                   | K              | W        | 95.00%                               | 44                    |                | 730.6215  | 4         | 8.0       | 331       | 356       | No        |    |     |
|                        |                          |         |                                                                                                                                            | AVAVVAHQQLSEGEHYWEVDV   | K              | W        | 95.00%                               | 44                    |                | 730.6215  | 4         | 8.0       | 331       | 356       | No        |    |     |
|                        |                          |         |                                                                                                                                            | GDKPR                   | K              | W        | 95.00%                               | 44                    |                | 730.6215  | 4         | 8.0       | 331       | 356       | No        |    |     |
|                        |                          |         |                                                                                                                                            | EKSVAVLEHQLVEEETVR      | K              | Q        | 95.00%                               | 54                    |                | 732.0659  | 3         | 4.7       | 148       | 166       | No        |    |     |
|                        |                          |         |                                                                                                                                            | ELGSLNSYLEQLR           | R              | Q        | 95.00%                               | 89                    |                | 761.4055  | 2         | 7.7       | 208       | 220       | No        |    |     |
|                        |                          |         |                                                                                                                                            | ILAESPPPAR              | K              | L        | 95.00%                               | 34                    |                | 1050.6020 | 1         | 6.6       | 251       | 260       | No        |    |     |
|                        |                          |         |                                                                                                                                            | ILAESPPPAR              | K              | L        | 95.00%                               | 58                    |                | 525.8033  | 2         | 3.7       | 251       | 260       | No        |    |     |
|                        |                          |         |                                                                                                                                            | ILEAHVEAK               | K              | E        | 95.00%                               | 44                    |                | 505.2907  | 2         | 5.2       | 390       | 398       | No        |    |     |
|                        |                          |         |                                                                                                                                            | LDIQLPIISDDFK           | R              | F        | 95.00%                               | 95                    |                | 758.9217  | 2         | 5.9       | 261       | 273       | No        |    |     |
|                        |                          |         |                                                                                                                                            | LDIQLPIISDDFK           | R              | F        | 95.00%                               | 49                    |                | 506.2824  | 3         | 3.2       | 261       | 273       | No        |    |     |
|                        |                          |         |                                                                                                                                            | LHAVPSQGLWLLGLR         | R              | E        | 95.00%                               | 72                    |                | 830.4965  | 2         | 9.1       | 372       | 386       | No        |    |     |
|                        |                          |         |                                                                                                                                            | LHAVPSQGLWLLGLR         | R              | E        | 95.00%                               | 50                    |                | 553.9985  | 3         | 5.8       | 372       | 386       | No        |    |     |
|                        |                          |         |                                                                                                                                            | LLPAEAHAR               | R              | L        | 95.00%                               | 46                    |                | 524.8027  | 2         | 6.8       | 119       | 128       | No        |    |     |
|                        |                          |         |                                                                                                                                            | RELGSLNSYLEQLR          | R              | Q        | 95.00%                               | 53                    |                | 559.9720  | 3         | 4.7       | 207       | 220       | No        |    |     |
|                        |                          |         |                                                                                                                                            | SVAVLEHQLVEEETVR        | K              | Q        | 95.00%                               | 128                   |                | 969.0275  | 2         | 6.6       | 150       | 166       | No        |    |     |
|                        |                          |         |                                                                                                                                            | SVAVLEHQLVEEETVR        | K              | Q        | 95.00%                               | 46                    |                | 646.3526  | 3         | 4.0       | 150       | 166       | No        |    |     |
|                        |                          |         |                                                                                                                                            | VFLAALGSLDR             | R              | E        | 95.00%                               | 108                   |                | 645.8606  | 2         | 5.8       | 181       | 192       | No        |    |     |
|                        |                          |         |                                                                                                                                            | VFLAALGSLDREAER         | R              | V        | 95.00%                               | 46                    |                | 888.4766  | 2         | 9.1       | 181       | 196       | No        |    |     |
| VFLAALGSLDREAER        | R                        | V       | 95.00%                                                                                                                                     | 71                      |                | 592.6530 | 3                                    | 8.0                   | 181            | 196       | No        |           |           |           |           |    |     |
| VLEEVDKPKQTEFLMK       | K                        | Y       | 95.00%                                                                                                                                     | 65                      | M15: Oxidation | 946.9936 | 2                                    | 5.9                   | 225            | 240       | No        |           |           |           |           |    |     |
| VLEEVDKPKQTEFLMK       | K                        | Y       | 95.00%                                                                                                                                     | 52                      | M15: Oxidation | 631.6653 | 3                                    | 6.4                   | 225            | 240       | No        |           |           |           |           |    |     |
| VRGEAGVALR             | R                        | R       | 95.00%                                                                                                                                     | 32                      |                | 514.3079 | 2                                    | 6.4                   | 197            | 206       | No        |           |           |           |           |    |     |

|     |                                       |        |                                                                                                                 |                        |   |   |        |     |                              |           |   |     |      |      |     |
|-----|---------------------------------------|--------|-----------------------------------------------------------------------------------------------------------------|------------------------|---|---|--------|-----|------------------------------|-----------|---|-----|------|------|-----|
|     |                                       |        |                                                                                                                 | WALGVIAAEAPR           | R | R | 95.00% | 104 |                              | 627.3567  | 2 | 3.9 | 357  | 368  | No  |
|     |                                       |        |                                                                                                                 | WALGVIAAEAPR           | R | R | 95.00% | 66  |                              | 418.5739  | 3 | 4.2 | 357  | 368  | No  |
| 429 | IPI00301419; IPI00798179              | COP57A | COP9 SIGNALOSOME COMPLEX SUBUNIT 7A.; 18 KDA PROTEIN.                                                           | ELAESDFASTFR           | R | L | 95.00% | 62  |                              | 686.8297  | 2 | 9.6 | 54   | 65   | No  |
|     |                                       |        |                                                                                                                 | LEVDSYGR               | R | D | 95.00% | 42  |                              | 526.2791  | 2 | 7.4 | 152  | 160  | No  |
| 430 | IPI00301464; IPI00412663; IPI00783326 | SGCA   | ISOFORM SGCA-1 OF ALPHA-SARCOGLYCAN PRECURSOR.; ISOFORM SGCA-2 OF ALPHA-SARCOGLYCAN PRECURSOR.; 43 KDA PROTEIN. | GLQVIEVTAYNR           | R | D | 95.00% | 83  |                              | 681.8768  | 2 | 5.6 | 99   | 110  | No  |
|     |                                       |        |                                                                                                                 | SHDAEEVLPSTPASR        | R | F | 95.00% | 86  |                              | 798.3909  | 2 | 4.5 | 142  | 156  | No  |
|     |                                       |        |                                                                                                                 | VDSAQVPLLDQH           | R | - | 95.00% | 79  |                              | 717.8874  | 2 | 5.3 | 375  | 387  | No  |
| 431 | IPI00302592; IPI00333541; IPI00644576 | FLNA   | FILAMIN A, ALPHA.; FILAMIN-A.; FILAMIN A, ALPHA.                                                                | AFGPGLQGGSGAGSPAR      | K | F | 95.00% | 61  |                              | 715.3703  | 2 | 9.6 | 1072 | 1087 | No  |
|     |                                       |        |                                                                                                                 | ANLPQSFQVDTSK          | R | A | 95.00% | 68  |                              | 717.8717  | 2 | 8.8 | 1465 | 1477 | No  |
|     |                                       |        |                                                                                                                 | AYGPGIEPTGNMVK         | R | K | 95.00% | 40  | M12: Oxidation               | 725.3611  | 2 | 6.7 | 286  | 299  | No  |
|     |                                       |        |                                                                                                                 | DAGEGLLAVQITDPEGKPK    | K | K | 95.00% | 73  |                              | 969.5171  | 2 | 3.8 | 1574 | 1592 | No  |
|     |                                       |        |                                                                                                                 | DLAEDAPWK              | K | K | 95.00% | 35  |                              | 522.7562  | 2 | 4.0 | 34   | 42   | Yes |
|     |                                       |        |                                                                                                                 | EATTEFSVDAR            | R | A | 95.00% | 30  |                              | 613.2936  | 2 | 7.7 | 1273 | 1283 | No  |
|     |                                       |        |                                                                                                                 | GQHVPGPSFQFTVGPLGEGGA  |   |   |        |     |                              |           |   |     |      |      |     |
|     |                                       |        |                                                                                                                 | HK                     | K | V | 95.00% | 48  |                              | 768.7294  | 3 | 8.7 | 2210 | 2232 | No  |
|     |                                       |        |                                                                                                                 | GQHVPGPSFQFTVGPLGEGGA  |   |   |        |     |                              |           |   |     |      |      |     |
|     |                                       |        |                                                                                                                 | HK                     | K | V | 95.00% | 53  |                              | 576.7983  | 4 | 7.5 | 2210 | 2232 | No  |
|     |                                       |        |                                                                                                                 | IQQNTFTR               | K | W | 95.00% | 44  |                              | 504.2695  | 2 | 3.8 | 44   | 51   | Yes |
|     |                                       |        |                                                                                                                 | LIALLEVLSQK            | R | K | 95.00% | 103 |                              | 613.8940  | 2 | 6.3 | 77   | 87   | No  |
|     |                                       |        |                                                                                                                 | LIALLEVLSQK            | R | K | 95.00% | 43  |                              | 409.5984  | 3 | 5.8 | 77   | 87   | No  |
|     |                                       |        |                                                                                                                 | LLGWIQNK               | R | L | 95.00% | 61  |                              | 486.2915  | 2 | 7.5 | 172  | 179  | No  |
|     |                                       |        |                                                                                                                 | SAGQGEVLVYVEDPAGHQEEAK | R | V | 95.00% | 40  |                              | 771.7102  | 3 | 6.4 | 310  | 331  | No  |
|     |                                       |        |                                                                                                                 | SPFSVAVSPSLDLSK        | K | I | 95.00% | 42  |                              | 767.4178  | 2 | 7.5 | 959  | 973  | No  |
|     |                                       |        |                                                                                                                 | TGVAVNKPAEFTVDAK       | K | H | 95.00% | 49  |                              | 823.9491  | 2 | 9.0 | 685  | 700  | No  |
|     |                                       |        |                                                                                                                 | VANPSGNLTETYVQDR       | R | G | 95.00% | 94  |                              | 882.4380  | 2 | 6.6 | 1297 | 1312 | No  |
|     |                                       |        |                                                                                                                 | VTAQGPGLPSGNIANK       | K | T | 95.00% | 77  |                              | 826.9383  | 2 | 4.9 | 384  | 400  | No  |
|     |                                       |        |                                                                                                                 | YGGQVPNPFPSK           | K | L | 95.00% | 32  |                              | 645.8309  | 2 | 4.4 | 1235 | 1246 | No  |
| 432 | IPI00302925; IPI00784090              | CCT8   | CHAPERONIN CONTAINING TCP1, SUBUNIT 8 (THETA) VARIANT.; T-COMPLEX PROTEIN 1 SUBUNIT THETA.                      | AIADTGANVVVTGGK        | K | V | 95.00% | 101 |                              | 686.8777  | 2 | 2.7 | 282  | 296  | No  |
|     |                                       |        |                                                                                                                 | DIDEVSSLLR             | R | T | 95.00% | 59  |                              | 573.8067  | 2 | 4.2 | 158  | 167  | No  |
|     |                                       |        |                                                                                                                 | DMLEAGILDTYLGK         | K | Y | 95.00% | 90  | M2: Oxidation                | 777.8941  | 2 | 4.8 | 493  | 506  | No  |
|     |                                       |        |                                                                                                                 | EDGAISTIVLR            | K | G | 95.00% | 37  |                              | 587.3307  | 2 | 4.7 | 370  | 380  | No  |
|     |                                       |        |                                                                                                                 | FAEAFEAIR              | K | A | 95.00% | 68  |                              | 575.8021  | 2 | 5.8 | 441  | 450  | No  |
|     |                                       |        |                                                                                                                 | HFSGLEEAIVYR           | K | N | 95.00% | 40  |                              | 654.3253  | 2 | 3.4 | 21   | 31   | No  |
|     |                                       |        |                                                                                                                 | LATNAAVTVLR            | K | V | 95.00% | 74  |                              | 564.8428  | 2 | 3.1 | 512  | 522  | No  |
|     |                                       |        |                                                                                                                 | LFVTNDAATILR           | K | E | 95.00% | 105 |                              | 667.3828  | 2 | 7.3 | 63   | 74   | No  |
|     |                                       |        |                                                                                                                 | NVGLDIEAEVPAVK         | K | D | 95.00% | 69  |                              | 727.4040  | 2 | 6.7 | 477  | 490  | No  |
|     |                                       |        |                                                                                                                 | YNIMLVR                | K | L | 95.00% | 39  | M4: Oxidation                | 462.7548  | 2 | 4.4 | 308  | 314  | No  |
| 433 | IPI00303258                           | LMCD1  | LIM AND CYSTEINE-RICH DOMAINS PROTEIN 1.                                                                        | DPTFDTITYEWAPPVGTQK    | K | L | 95.00% | 64  |                              | 1083.5330 | 2 | 8.8 | 110  | 128  | No  |
|     |                                       |        |                                                                                                                 | EKQPVGTGEGAFYR         | K | R | 95.00% | 69  |                              | 791.8990  | 2 | 2.2 | 140  | 153  | No  |
|     |                                       |        |                                                                                                                 | EKQPVGTGEGAFYR         | K | R | 95.00% | 47  |                              | 528.2689  | 3 | 2.7 | 140  | 153  | No  |
|     |                                       |        |                                                                                                                 | GAAPPDSPVVYSDR         | K | A | 95.00% | 62  |                              | 715.8524  | 2 | 3.7 | 248  | 261  | No  |
|     |                                       |        |                                                                                                                 | GLLENELK               | R | L | 95.00% | 37  |                              | 458.2633  | 2 | 3.7 | 173  | 180  | No  |
|     |                                       |        |                                                                                                                 | KMSLGQLQSAR            | K | G | 95.00% | 59  | M2: Oxidation                | 617.8372  | 2 | 7.1 | 14   | 24   | No  |
|     |                                       |        |                                                                                                                 | LGLQYMELIPK            | K | E | 95.00% | 55  | M6: Oxidation                | 660.8713  | 2 | 8.1 | 129  | 139  | No  |
|     |                                       |        |                                                                                                                 | MIMTNPIATGK            | R | D | 95.00% | 52  | M1: Oxidation, M3: Oxidation | 604.8082  | 2 | 5.5 | 99   | 109  | No  |
|     |                                       |        |                                                                                                                 | MSLGQLQSAR             | K | G | 95.00% | 58  | M1: Oxidation                | 553.7858  | 2 | 0.8 | 15   | 24   | No  |
|     |                                       |        |                                                                                                                 | QLMHQLPIYDQDPSR        | R | C | 95.00% | 61  | M3: Oxidation                | 928.9609  | 2 | 9.3 | 156  | 170  | No  |
|     |                                       |        |                                                                                                                 | QLMHQLPIYDQDPSR        | R | C | 95.00% | 52  | M3: Oxidation                | 619.6406  | 3 | 5.0 | 156  | 170  | No  |
|     |                                       |        |                                                                                                                 | QPVTGTGEGAFYR          | K | R | 95.00% | 45  |                              | 663.3303  | 2 | 2.9 | 142  | 153  | No  |
|     |                                       |        |                                                                                                                 | SEALGVGEVALPGQGGLPK    | K | E | 95.00% | 108 |                              | 889.9945  | 2 | 8.7 | 191  | 209  | No  |
|     |                                       |        |                                                                                                                 | SEALGVGEVALPGQGGLPK    | K | E | 95.00% | 29  |                              | 593.6618  | 3 | 2.3 | 191  | 209  | No  |
|     |                                       |        |                                                                                                                 | SEALGVGEVALPGQGGLPKEEG |   |   |        |     |                              |           |   |     |      |      |     |
|     |                                       |        |                                                                                                                 | K                      | K | Q | 95.00% | 79  |                              | 741.4011  | 3 | 9.2 | 191  | 213  | No  |
| 434 | IPI00303476                           | ATP5B  | ATP SYNTHASE SUBUNIT BETA, MITOCHONDRIAL PRECURSOR.                                                             | ADKLAEEHSS             | K | - | 95.00% | 32  |                              | 543.7590  | 2 | 3.1 | 520  | 529  | No  |
|     |                                       |        |                                                                                                                 | AHGGYSVFAGVGER         | K | T | 95.00% | 114 |                              | 703.8459  | 2 | 1.7 | 226  | 239  | No  |
|     |                                       |        |                                                                                                                 | AHGGYSVFAGVGER         | K | T | 95.00% | 55  |                              | 469.5676  | 3 | 4.0 | 226  | 239  | No  |
|     |                                       |        |                                                                                                                 | AIAELGIYPVDPDLDSTSR    | R | I | 95.00% | 114 |                              | 994.5288  | 2 | 7.8 | 388  | 406  | No  |
|     |                                       |        |                                                                                                                 | AIAELGIYPVDPDLDSTSR    | R | I | 95.00% | 71  |                              | 663.3547  | 3 | 7.1 | 388  | 406  | No  |
|     |                                       |        |                                                                                                                 | DOEGQDVLFDNIFR         | R | F | 95.00% | 133 |                              | 961.4921  | 2 | 5.3 | 295  | 310  | No  |

|                          |   |   |        |     |                                   |           |   |      |     |     |    |
|--------------------------|---|---|--------|-----|-----------------------------------|-----------|---|------|-----|-----|----|
| DQEQDQVLLFIDNIFR         | R | F | 95.00% | 87  |                                   | 641.3314  | 3 | 6.5  | 295 | 310 | No |
| EGNDLYHEMIESGVINLK       | R | D | 95.00% | 84  | M9: Oxidation                     | 1039.0070 | 2 | 7.5  | 242 | 259 | No |
| EGNDLYHEMIESGVINLK       | R | D | 95.00% | 73  | M9: Oxidation                     | 693.0071  | 3 | 6.9  | 242 | 259 | No |
| EGNDLYHEMIESGVINLK       | R | D | 95.00% | 56  |                                   | 1031.0080 | 2 | 5.3  | 242 | 259 | No |
| EGNDLYHEMIESGVINLK       | R | D | 95.00% | 44  |                                   | 687.6755  | 3 | 7.1  | 242 | 259 | No |
| FLSQPFQVAEVFTGHMGK       | R | L | 95.00% | 93  | M16: Oxidation                    | 1020.0150 | 2 | 7.8  | 463 | 480 | No |
| FLSQPFQVAEVFTGHMGK       | R | L | 95.00% | 63  | M16: Oxidation                    | 680.3444  | 3 | 5.6  | 463 | 480 | No |
| FLSQPFQVAEVFTGHMGK       | R | L | 95.00% | 57  |                                   | 675.0131  | 3 | 6.1  | 463 | 480 | No |
| FTQAGSEVSALLGR           | R | I | 95.00% | 105 |                                   | 718.3864  | 2 | 7.3  | 311 | 324 | No |
| FTQAGSEVSALLGR           | R | I | 95.00% | 65  |                                   | 479.2591  | 3 | 5.0  | 311 | 324 | No |
| GFQQILAGEYDHLPEQAFYMGV   |   |   |        |     |                                   |           |   |      |     |     |    |
| PIEEAVAK                 | K | A | 95.00% | 46  | M20: Oxidation                    | 1122.8950 | 3 | 9.9  | 490 | 519 | No |
| GFQQILAGEYDHLPEQAFYMGV   |   |   |        |     |                                   |           |   |      |     |     |    |
| PIEEAVAK                 | K | A | 95.00% | 59  | M20: Oxidation                    | 842.4225  | 4 | 9.2  | 490 | 519 | No |
| GFQQILAGEYDHLPEQAFYMGV   |   |   |        |     |                                   |           |   |      |     |     |    |
| PIEEAVAK                 | K | A | 95.00% | 34  |                                   | 838.4243  | 4 | 9.9  | 490 | 519 | No |
| GSITSVQAIYVPADDLTPAPAT   |   |   |        |     |                                   |           |   |      |     |     |    |
| TFAHLDATTVLSR            | K | A | 95.00% | 90  |                                   | 1238.9800 | 3 | 10.0 | 352 | 387 | No |
| GSITSVQAIYVPADDLTPAPAT   |   |   |        |     |                                   |           |   |      |     |     |    |
| TFAHLDATTVLSR            | K | A | 95.00% | 35  |                                   | 929.4862  | 4 | 9.4  | 352 | 387 | No |
| IGLFGGAGVGK              | K | T | 95.00% | 39  |                                   | 975.5690  | 1 | 6.3  | 202 | 212 | No |
| IGLFGGAGVGK              | K | T | 95.00% | 61  |                                   | 488.2884  | 2 | 6.2  | 202 | 212 | No |
| IMDPNIVGSEHYDVAR         | R | G | 95.00% | 116 | M2: Oxidation                     | 916.4394  | 2 | 3.4  | 407 | 422 | No |
| IMDPNIVGSEHYDVAR         | R | G | 95.00% | 72  | M2: Oxidation                     | 611.2952  | 3 | 2.9  | 407 | 422 | No |
| IMNVIGEPIDER             | R | G | 95.00% | 91  | M2: Oxidation                     | 701.3586  | 2 | 3.2  | 144 | 155 | No |
| IMNVIGEPIDER             | R | G | 95.00% | 67  |                                   | 693.3625  | 2 | 5.1  | 144 | 155 | No |
| IMNVIGEPIDERGPIK         | R | T | 95.00% | 72  | M2: Oxidation                     | 898.9905  | 2 | 8.3  | 144 | 159 | No |
| IMNVIGEPIDERGPIK         | R | T | 95.00% | 40  | M2: Oxidation                     | 599.6602  | 3 | 3.7  | 144 | 159 | No |
| IPSAVGYQPTLATDMGTMQER    | R | I | 95.00% | 87  | M15: Oxidation                    | 1141.5530 | 2 | 7.6  | 325 | 345 | No |
| IPSAVGYQPTLATDMGTMQER    | R | I | 95.00% | 89  | M15: Oxidation                    | 1149.5520 | 2 | 9.6  | 325 | 345 | No |
| IPSAVGYQPTLATDMGTMQER    | R | I | 95.00% | 87  | M15: Oxidation                    | 766.7002  | 3 | 4.4  | 325 | 345 | No |
| IPSAVGYQPTLATDMGTMQER    | R | I | 95.00% | 89  | M15: Oxidation,<br>M18: Oxidation | 1149.5520 | 2 | 9.6  | 325 | 345 | No |
| IPSAVGYQPTLATDMGTMQER    | R | I | 95.00% | 91  | M18: Oxidation                    | 766.7007  | 3 | 5.0  | 325 | 345 | No |
| IPSAVGYQPTLATDMGTMQER    | R | I | 95.00% | 91  | M18: Oxidation                    | 1141.5530 | 2 | 7.8  | 325 | 345 | No |
| IPSAVGYQPTLATDMGTMQER    | R | I | 95.00% | 65  | M18: Oxidation                    | 761.3701  | 3 | 6.4  | 325 | 345 | No |
| IPVGPETLGR               | K | I | 95.00% | 55  |                                   | 1038.6010 | 1 | 6.1  | 134 | 143 | No |
| IPVGPETLGR               | K | I | 95.00% | 70  |                                   | 519.8018  | 2 | 0.8  | 134 | 143 | No |
| KGSITSVQAIYVPADDLTPAPATA |   |   |        |     |                                   |           |   |      |     |     |    |
| TTFAHLDATTVLSR           | K | A | 95.00% | 137 |                                   | 1281.6580 | 3 | -5.8 | 351 | 387 | No |
| KGSITSVQAIYVPADDLTPAPATA |   |   |        |     |                                   |           |   |      |     |     |    |
| TTFAHLDATTVLSR           | K | A | 95.00% | 58  |                                   | 961.5087  | 4 | 7.9  | 351 | 387 | No |
| LVLEVAQHLGESTVR          | R | T | 95.00% | 130 |                                   | 825.9633  | 2 | 0.4  | 95  | 109 | No |
| LVLEVAQHLGESTVR          | R | T | 95.00% | 71  |                                   | 550.9806  | 3 | 5.0  | 95  | 109 | No |
| LVPLKETIK                | K | G | 95.00% | 26  |                                   | 1040.6760 | 1 | 3.5  | 481 | 489 | No |
| LVPLKETIK                | K | G | 95.00% | 50  |                                   | 520.8408  | 2 | 1.5  | 481 | 489 | No |
| QFAPIHAEAPEFMEMSVEQEILV  |   |   |        |     |                                   |           |   |      |     |     |    |
| TGIIK                    | K | V | 95.00% | 37  | M13: Oxidation                    | 1020.8370 | 3 | -3.6 | 162 | 188 | No |
| QFAPIHAEAPEFMEMSVEQEILV  |   |   |        |     |                                   |           |   |      |     |     |    |
| TGIIK                    | K | V | 95.00% | 74  | M13: Oxidation                    | 1026.1810 | 3 | 8.4  | 162 | 188 | No |
| QFAPIHAEAPEFMEMSVEQEILV  |   |   |        |     |                                   |           |   |      |     |     |    |
| TGIIK                    | K | V | 95.00% | 56  | M13: Oxidation                    | 769.8849  | 4 | 5.0  | 162 | 188 | No |
| QFAPIHAEAPEFMEMSVEQEILV  |   |   |        |     |                                   |           |   |      |     |     |    |
| TGIIK                    | K | V | 95.00% | 74  | M13: Oxidation,<br>M15: Oxidation | 1026.1810 | 3 | 8.4  | 162 | 188 | No |
| QFAPIHAEAPEFMEMSVEQEILV  |   |   |        |     |                                   |           |   |      |     |     |    |
| TGIIK                    | K | V | 95.00% | 56  | M13: Oxidation,<br>M15: Oxidation | 769.8849  | 4 | 5.0  | 162 | 188 | No |
| QFAPIHAEAPEFMEMSVEQEILV  |   |   |        |     |                                   |           |   |      |     |     |    |
| TGIIK                    | K | V | 95.00% | 45  | M15: Oxidation                    | 1020.8370 | 3 | -3.3 | 162 | 188 | No |
| SLQDIIAILGMDLSEEDK       | K | L | 95.00% | 131 | M11: Oxidation                    | 1068.0350 | 2 | 8.7  | 433 | 451 | No |
| SLQDIIAILGMDLSEEDK       | K | L | 95.00% | 42  | M11: Oxidation                    | 712.3574  | 3 | 6.2  | 433 | 451 | No |
| SLQDIIAILGMDLSEEDKLTVSR  | K | A | 95.00% | 101 | M11: Oxidation                    | 897.8032  | 3 | 6.6  | 433 | 456 | No |
| SLQDIIAILGMDLSEEDKLTVSR  | K | A | 95.00% | 85  | M11: Oxidation                    | 673.6050  | 4 | 7.5  | 433 | 456 | No |
| SLQDIIAILGMDLSEEDKLTVSR  | K | A | 95.00% | 85  |                                   | 892.4738  | 3 | 9.1  | 433 | 456 | No |
| SLQDIIAILGMDLSEEDKLTVSR  | K | A | 95.00% | 58  |                                   | 669.6068  | 4 | 8.4  | 433 | 456 | No |
| TIAMDGTEGLVR             | R | G | 95.00% | 85  | M4: Oxidation                     | 639.8239  | 2 | 2.8  | 110 | 121 | No |

|     |                                       |                |                                                                 |                                                                                           |   |   |        |     |                                 |           |   |     |     |     |     |
|-----|---------------------------------------|----------------|-----------------------------------------------------------------|-------------------------------------------------------------------------------------------|---|---|--------|-----|---------------------------------|-----------|---|-----|-----|-----|-----|
|     |                                       |                |                                                                 | TIAMDGTEGLVR                                                                              | R | G | 95.00% | 76  |                                 | 631.8275  | 2 | 4.4 | 110 | 121 | No  |
|     |                                       |                |                                                                 | TREGNDLYHEMIESGVINLK                                                                      | R | D | 95.00% | 59  | M11: Oxidation                  | 1167.5810 | 2 | 6.5 | 240 | 259 | No  |
|     |                                       |                |                                                                 | TREGNDLYHEMIESGVINLK                                                                      | R | D | 95.00% | 53  | M11: Oxidation                  | 778.7233  | 3 | 6.2 | 240 | 259 | No  |
|     |                                       |                |                                                                 | TREGNDLYHEMIESGVINLK                                                                      | R | D | 95.00% | 47  | M11: Oxidation                  | 584.2928  | 4 | 3.5 | 240 | 259 | No  |
|     |                                       |                |                                                                 | TREGNDLYHEMIESGVINLK                                                                      | R | D | 95.00% | 79  |                                 | 773.3917  | 3 | 6.2 | 240 | 259 | No  |
|     |                                       |                |                                                                 | TREGNDLYHEMIESGVINLK                                                                      | R | D | 95.00% | 46  |                                 | 580.2962  | 4 | 7.1 | 240 | 259 | No  |
|     |                                       |                |                                                                 | TVLIMELINNVAK                                                                             | K | A | 95.00% | 99  | M5: Oxidation                   | 737.4262  | 2 | 6.5 | 213 | 225 | No  |
|     |                                       |                |                                                                 | TVLIMELINNVAK                                                                             | K | A | 95.00% | 71  | M5: Oxidation                   | 491.9544  | 3 | 8.4 | 213 | 225 | No  |
|     |                                       |                |                                                                 | TVLIMELINNVAK                                                                             | K | A | 95.00% | 95  |                                 | 729.4305  | 2 | 9.0 | 213 | 225 | No  |
|     |                                       |                |                                                                 | VALTGLTVAEYFR                                                                             | R | D | 95.00% | 122 |                                 | 720.4020  | 2 | 4.4 | 282 | 294 | No  |
|     |                                       |                |                                                                 | VALTGLTVAEYFR                                                                             | R | D | 95.00% | 83  |                                 | 480.6042  | 3 | 4.8 | 282 | 294 | No  |
|     |                                       |                |                                                                 | VALVYGOMNEPPGAR                                                                           | K | A | 95.00% | 127 | M8: Oxidation                   | 809.4089  | 2 | 2.4 | 265 | 279 | No  |
|     |                                       |                |                                                                 | VALVYGOMNEPPGAR                                                                           | K | A | 95.00% | 50  | M8: Oxidation                   | 539.9427  | 3 | 4.1 | 265 | 279 | No  |
|     |                                       |                |                                                                 | VALVYGOMNEPPGAR                                                                           | K | A | 95.00% | 110 |                                 | 801.4127  | 2 | 4.0 | 265 | 279 | No  |
|     |                                       |                |                                                                 | VLDSGAPIK                                                                                 | K | I | 95.00% | 45  |                                 | 899.5261  | 1 | 6.4 | 125 | 133 | No  |
|     |                                       |                |                                                                 | VLDSGAPIK                                                                                 | K | I | 95.00% | 79  |                                 | 450.2650  | 2 | 2.2 | 125 | 133 | No  |
|     |                                       |                |                                                                 | VLDSGAPIKIPVGPETLGR                                                                       | K | I | 95.00% | 109 |                                 | 960.0607  | 2 | 8.6 | 125 | 143 | No  |
|     |                                       |                |                                                                 | VLDSGAPIKIPVGPETLGR                                                                       | K | I | 95.00% | 88  |                                 | 640.3743  | 3 | 5.3 | 125 | 143 | No  |
|     |                                       |                |                                                                 | VVDLLAPYAK                                                                                | K | G | 95.00% | 51  |                                 | 1088.6440 | 1 | 7.2 | 189 | 198 | No  |
|     |                                       |                |                                                                 | VVDLLAPYAK                                                                                | K | G | 95.00% | 55  |                                 | 544.8221  | 2 | 0.6 | 189 | 198 | No  |
|     |                                       |                |                                                                 | PROSTAGLANDIN E SYNTHASE 2.;<br>PROSTAGLANDIN E SYNTHASE 2 ISOFORM 2.; 29<br>KDA PROTEIN. |   |   |        |     |                                 |           |   |     |     |     |     |
| 435 | IPI00303568; IPI00395565; IPI00514138 | PTGES2         |                                                                 | SAAQSLSSR                                                                                 | R | L | 95.00% | 32  |                                 | 510.2808  | 2 | 5.4 | 90  | 99  | No  |
|     |                                       |                |                                                                 | TPTEALASFDYIVR                                                                            | R | E | 95.00% | 77  |                                 | 791.9162  | 2 | 8.1 | 62  | 75  | No  |
|     |                                       |                |                                                                 | YMGAAMYLSIK                                                                               | K | R | 95.00% | 36  | M2: Oxidation, M7:<br>Oxidation | 675.8322  | 2 | 9.6 | 89  | 100 | No  |
| 436 | IPI00303882                           | M6PRBP1        | ISOFORM B OF MANNOSE-6-PHOSPHATE<br>RECEPTOR-BINDING PROTEIN 1. | DTVATQLSEAVDATR                                                                           | K | G | 95.00% | 87  |                                 | 788.8993  | 3 | 5.6 | 141 | 155 | No  |
|     |                                       |                |                                                                 | GLDKLEENLPILQQPTEK                                                                        | R | V | 95.00% | 46  |                                 | 689.0483  | 2 | 5.1 | 99  | 116 | No  |
|     |                                       |                |                                                                 | IATSLDGFDFVASVQQQR                                                                        | R | Q | 95.00% | 102 |                                 | 917.9764  | 2 | 8.2 | 214 | 230 | No  |
|     |                                       |                |                                                                 | LEPQIASASEYADR                                                                            | K | G | 95.00% | 85  |                                 | 786.3978  | 2 | 3.9 | 85  | 98  | No  |
|     |                                       |                |                                                                 | LGQMVLSGVDTVLKG                                                                           | R | S | 95.00% | 84  | M4: Oxidation                   | 766.9262  | 2 | 5.7 | 181 | 195 | No  |
|     |                                       |                |                                                                 | LGQMVLSGVDTVLKG                                                                           | R | S | 95.00% | 35  | M4: Oxidation                   | 511.6189  | 3 | 3.3 | 181 | 195 | No  |
|     |                                       |                |                                                                 | SEEWADNHLPLTDAELAR                                                                        | K | I | 95.00% | 62  |                                 | 689.6696  | 3 | 7.1 | 196 | 213 | No  |
|     |                                       |                |                                                                 | SVVTGGVQSMGSR                                                                             | K | L | 95.00% | 84  | M11: Oxidation                  | 690.3530  | 2 | 2.1 | 167 | 180 | No  |
|     |                                       |                |                                                                 | TLTAAAVSQAQPILSK                                                                          | R | L | 95.00% | 43  |                                 | 764.4485  | 2 | 9.4 | 69  | 84  | No  |
|     |                                       |                |                                                                 | VSGAQEMVSSAK                                                                              | K | D | 95.00% | 61  | M7: Oxidation                   | 605.2957  | 2 | 4.3 | 129 | 140 | No  |
| 437 | IPI00304925; IPI00807640              | HSPA1A; HSPA1B | HEAT SHOCK 70 KDA PROTEIN 1.; HEAT SHOCK<br>70KDA PROTEIN 1B.   | AFYPEEISSMVLTK                                                                            | K | M | 95.00% | 100 | M10: Oxidation                  | 815.9094  | 2 | 4.4 | 113 | 126 | No  |
|     |                                       |                |                                                                 | AFYPEEISSMVLTK                                                                            | K | M | 95.00% | 40  | M10: Oxidation                  | 544.2754  | 3 | 4.3 | 113 | 126 | No  |
|     |                                       |                |                                                                 | AQIHDLVLVGGSTR                                                                            | K | I | 95.00% | 92  |                                 | 733.4114  | 2 | 1.4 | 329 | 342 | No  |
|     |                                       |                |                                                                 | AQIHDLVLVGGSTR                                                                            | K | I | 95.00% | 40  |                                 | 489.2786  | 3 | 4.8 | 329 | 342 | No  |
|     |                                       |                |                                                                 | ATAGDTHLGGEDFDNR                                                                          | K | L | 95.00% | 93  |                                 | 838.3727  | 2 | 3.7 | 221 | 236 | No  |
|     |                                       |                |                                                                 | ATAGDTHLGGEDFDNR                                                                          | K | L | 95.00% | 64  |                                 | 559.2514  | 3 | 4.3 | 221 | 236 | No  |
|     |                                       |                |                                                                 | DAGVIAGLNVLR                                                                              | K | I | 95.00% | 102 |                                 | 599.3562  | 2 | 7.3 | 160 | 171 | No  |
|     |                                       |                |                                                                 | FGDPVVQSDMK                                                                               | K | H | 95.00% | 58  | M10: Oxidation                  | 619.7940  | 2 | 5.9 | 78  | 88  | No  |
|     |                                       |                |                                                                 | HWPFFQVINDGDKPK                                                                           | K | V | 95.00% | 63  |                                 | 560.9581  | 3 | 5.0 | 89  | 102 | No  |
|     |                                       |                |                                                                 | IINEPTAAAIAYGLDR                                                                          | R | T | 95.00% | 140 |                                 | 844.4603  | 2 | 6.3 | 172 | 187 | No  |
|     |                                       |                |                                                                 | IINEPTAAAIAYGLDR                                                                          | R | T | 95.00% | 59  |                                 | 563.3094  | 3 | 6.1 | 172 | 187 | No  |
|     |                                       |                |                                                                 | LDKAIQHDLVLVGGSTR                                                                         | K | I | 95.00% | 108 |                                 | 911.5180  | 2 | 5.1 | 326 | 342 | No  |
|     |                                       |                |                                                                 | LDKAIQHDLVLVGGSTR                                                                         | K | I | 95.00% | 61  |                                 | 608.0134  | 3 | 3.0 | 326 | 342 | No  |
|     |                                       |                |                                                                 | LLQDFFNGR                                                                                 | K | D | 95.00% | 42  |                                 | 1109.5820 | 1 | 6.4 | 349 | 357 | No  |
|     |                                       |                |                                                                 | LLQDFFNGR                                                                                 | K | D | 95.00% | 55  |                                 | 555.2931  | 2 | 3.5 | 349 | 357 | No  |
|     |                                       |                |                                                                 | LVNHFVEEFK                                                                                | R | R | 95.00% | 50  |                                 | 631.3351  | 2 | 3.4 | 237 | 246 | No  |
|     |                                       |                |                                                                 | LVNHFVEEFK                                                                                | R | R | 95.00% | 43  |                                 | 421.2257  | 3 | 2.7 | 237 | 246 | No  |
|     |                                       |                |                                                                 | LVNHFVEEFKR                                                                               | R | K | 95.00% | 38  |                                 | 709.3867  | 2 | 4.6 | 237 | 247 | No  |
|     |                                       |                |                                                                 | LVNHFVEEFKR                                                                               | R | K | 95.00% | 48  |                                 | 473.2583  | 3 | 0.2 | 237 | 247 | No  |
|     |                                       |                |                                                                 | MKEIAEAYLYPVTNAVITVPAY<br>FNDSQR                                                          | K | Q | 95.00% | 49  | M1: Oxidation                   | 1092.8900 | 3 | 8.6 | 127 | 155 | No  |
|     |                                       |                |                                                                 | NALESYAFNMK                                                                               | K | S | 95.00% | 76  | M10: Oxidation                  | 652.3064  | 2 | 4.4 | 540 | 550 | No  |
|     |                                       |                |                                                                 | NQVALNPQNTVFDKAK                                                                          | K | R | 95.00% | 121 |                                 | 829.9344  | 2 | 6.5 | 57  | 71  | No  |
|     |                                       |                |                                                                 | NQVALNPQNTVFDKAK                                                                          | K | L | 95.00% | 52  |                                 | 907.9852  | 2 | 6.3 | 57  | 72  | No  |
|     |                                       |                |                                                                 | QTQIFTTYSDNQPGVLIQVYEGE<br>R                                                              | K | A | 95.00% | 66  |                                 | 929.4631  | 3 | 3.7 | 424 | 447 | No  |
|     |                                       |                |                                                                 | SINPDEAVAYGAAVQAAILMGDK                                                                   | K | S | 95.00% | 131 | M20: Oxidation                  | 1160.5870 | 2 | 7.4 | 362 | 384 | No  |
|     |                                       |                |                                                                 | SINPDEAVAYGAAVQAAILMGDK                                                                   | K | S | 95.00% | 64  | M20: Oxidation                  | 774.0588  | 3 | 4.8 | 362 | 384 | No  |
|     |                                       |                |                                                                 | TTPSYVAFDTER                                                                              | R | L | 95.00% | 100 |                                 | 744.3601  | 2 | 7.1 | 37  | 49  | Yes |
|     |                                       |                |                                                                 | VEIANDQGNR                                                                                | K | T | 95.00% | 52  |                                 | 1228.6370 | 1 | 7.0 | 26  | 36  | Yes |

|     |             |        |                                                                                           |                         |   |   |        |     |                               |           |   |     |     |     |     |
|-----|-------------|--------|-------------------------------------------------------------------------------------------|-------------------------|---|---|--------|-----|-------------------------------|-----------|---|-----|-----|-----|-----|
|     |             |        |                                                                                           | VEIIANDQGNR             | K | T | 95.00% | 81  |                               | 614.8218  | 2 | 5.9 | 26  | 36  | Yes |
| 438 | IPI00305166 | SDHA   | SUCCINATE DEHYDROGENASE [UBIQUINONE] FLAVOPROTEIN SUBUNIT, MITOCHONDRIAL PRECURSOR.       | GEGGILINSQGER           | R | F | 95.00% | 84  |                               | 665.3450  | 2 | 4.3 | 313 | 325 | No  |
|     |             |        |                                                                                           | HTLSYVDVGTGK            | K | V | 95.00% | 41  |                               | 638.8351  | 2 | 6.7 | 625 | 636 | No  |
|     |             |        |                                                                                           | IDEYDYSKPIQQQK          | R | K | 95.00% | 81  |                               | 906.4459  | 2 | 1.1 | 601 | 615 | No  |
|     |             |        |                                                                                           | IDEYDYSKPIQQGQK         | R | K | 95.00% | 59  |                               | 604.6346  | 3 | 3.5 | 601 | 615 | No  |
|     |             |        |                                                                                           | KHTLSYVDVGTGK           | R | V | 95.00% | 71  |                               | 702.8809  | 2 | 3.6 | 624 | 636 | No  |
|     |             |        |                                                                                           | KHTLSYVDVGTGK           | R | V | 95.00% | 48  |                               | 468.9224  | 3 | 1.9 | 624 | 636 | No  |
|     |             |        |                                                                                           | KPFEEHWR                | K | K | 95.00% | 37  |                               | 564.7869  | 2 | 6.2 | 616 | 623 | No  |
|     |             |        |                                                                                           | LGANSLDLVVFGR           | R | A | 95.00% | 117 |                               | 737.4294  | 2 | 5.5 | 452 | 465 | No  |
|     |             |        |                                                                                           | LGANSLDLVVFGR           | R | A | 95.00% | 56  |                               | 491.9565  | 3 | 7.4 | 452 | 465 | No  |
|     |             |        |                                                                                           | NTVVATGGYGR             | K | T | 95.00% | 74  |                               | 547.7869  | 2 | 6.0 | 251 | 261 | No  |
|     |             |        |                                                                                           | SHTVAAQGGINAALGNMEEDN   |   |   |        |     |                               |           |   |     |     |     |     |
|     |             |        |                                                                                           | WR                      | R | W | 95.00% | 59  | M17: Oxidation                | 819.7198  | 3 | 9.0 | 98  | 120 | No  |
|     |             |        |                                                                                           | SMQNHAAVFR              | K | V | 95.00% | 56  | M2: Oxidation                 | 588.7852  | 2 | 3.5 | 518 | 527 | No  |
|     |             |        |                                                                                           | SMTLEIR                 | R | E | 95.00% | 32  | M2: Oxidation                 | 433.2276  | 2 | 2.2 | 346 | 352 | No  |
|     |             |        |                                                                                           | TGHSLLEHTLYGR           | R | S | 95.00% | 80  |                               | 677.8676  | 2 | 3.1 | 196 | 207 | No  |
|     |             |        |                                                                                           | VPPIKPNAGEESVMNLDK      | K | L | 95.00% | 74  | M14: Oxidation                | 977.5049  | 2 | 3.2 | 481 | 498 | No  |
|     |             |        |                                                                                           | VPPIKPNAGEESVMNLDK      | K | L | 95.00% | 47  | M14: Oxidation                | 652.0066  | 3 | 4.4 | 481 | 498 | No  |
|     |             |        |                                                                                           | VRIDEYDYSKPIQQQK        | K | K | 95.00% | 78  |                               | 1034.0370 | 2 | 7.3 | 599 | 615 | No  |
|     |             |        |                                                                                           | VRIDEYDYSKPIQQQK        | K | K | 95.00% | 48  |                               | 689.6914  | 3 | 3.5 | 599 | 615 | No  |
|     |             |        |                                                                                           | VSDSISAQYPVVDFEFDVAVVG  |   |   |        |     |                               |           |   |     |     |     |     |
|     |             |        |                                                                                           | AGGAGLR                 | K | A | 95.00% | 38  |                               | 972.4968  | 3 | 7.2 | 47  | 75  | No  |
|     |             |        |                                                                                           | VTLEYRVIDK              | K | T | 95.00% | 72  |                               | 666.8820  | 2 | 2.5 | 637 | 647 | No  |
| 439 | IPI00305383 | UQCRC2 | UBIQUINOL-CYTOCHROME-C REDUCTASE COMPLEX CORE PROTEIN 2, MITOCHONDRIAL PRECURSOR.         | ATAAPAGAPPQPQDLEFTK     | K | L | 95.00% | 98  |                               | 955.4943  | 2 | 7.6 | 24  | 42  | No  |
|     |             |        |                                                                                           | ATAAPAGAPPQPQDLEFTK     | K | L | 95.00% | 44  |                               | 637.3300  | 3 | 4.3 | 24  | 42  | No  |
|     |             |        |                                                                                           | AVAFQNPQTHVIEHLHAAAYR   | K | N | 95.00% | 87  |                               | 784.0795  | 3 | 7.5 | 163 | 183 | No  |
|     |             |        |                                                                                           | GDVDILMEFLNVTTAPEFR     | R | R | 95.00% | 69  | M7: Oxidation                 | 766.0632  | 3 | 8.9 | 128 | 147 | No  |
|     |             |        |                                                                                           | LPNGLVIASLENYSPVSR      | K | I | 95.00% | 125 |                               | 965.0312  | 2 | 5.2 | 43  | 60  | No  |
|     |             |        |                                                                                           | LPNGLVIASLENYSPVSR      | K | I | 95.00% | 64  |                               | 643.6911  | 3 | 6.8 | 43  | 60  | No  |
|     |             |        |                                                                                           | MALIGLGVSHPLK           | R | Q | 95.00% | 99  | M1: Oxidation                 | 725.9299  | 2 | 4.2 | 218 | 231 | No  |
|     |             |        |                                                                                           | MALIGLGVSHPLK           | R | Q | 95.00% | 60  | M1: Oxidation                 | 484.2892  | 3 | 4.3 | 218 | 231 | No  |
|     |             |        |                                                                                           | MALIGLGVSHPLK           | R | Q | 95.00% | 86  |                               | 717.9340  | 2 | 6.5 | 218 | 231 | No  |
|     |             |        |                                                                                           | MALIGLGVSHPLK           | R | Q | 95.00% | 54  |                               | 478.9575  | 3 | 4.3 | 218 | 231 | No  |
|     |             |        |                                                                                           | QVAEQFLNMR              | K | G | 95.00% | 82  | M9: Oxidation                 | 626.3145  | 2 | 4.5 | 232 | 241 | No  |
|     |             |        |                                                                                           | RWEVADLQPQK             | R | I | 95.00% | 86  |                               | 741.9111  | 2 | 4.9 | 148 | 159 | No  |
|     |             |        |                                                                                           | RWEVADLQPQK             | R | I | 95.00% | 66  |                               | 494.9431  | 3 | 4.5 | 148 | 159 | No  |
|     |             |        |                                                                                           | SMAASGNLGHPTPFVDEL      | K | - | 95.00% | 82  | M2: Oxidation                 | 881.4176  | 2 | 8.8 | 437 | 453 | No  |
|     |             |        |                                                                                           | SMAASGNLGHPTPFVDEL      | K | - | 95.00% | 65  |                               | 873.4186  | 2 | 7.1 | 437 | 453 | No  |
|     |             |        |                                                                                           | TIAQGNLSNTDVQAAK        | K | N | 95.00% | 116 |                               | 815.9266  | 2 | 3.1 | 360 | 375 | No  |
|     |             |        |                                                                                           | TIAQGNLSNTDVQAAK        | K | N | 95.00% | 51  |                               | 544.2890  | 3 | 6.8 | 360 | 375 | No  |
|     |             |        |                                                                                           | VTSEELHYFVQNHFTSAR      | K | M | 95.00% | 86  |                               | 1083.0320 | 2 | 6.5 | 200 | 217 | No  |
|     |             |        |                                                                                           | VTSEELHYFVQNHFTSAR      | K | M | 95.00% | 58  |                               | 722.3581  | 3 | 8.1 | 200 | 217 | No  |
|     |             |        |                                                                                           | WEVADLQPQK              | R | I | 95.00% | 48  |                               | 663.8607  | 2 | 5.6 | 149 | 159 | No  |
|     |             |        |                                                                                           | YEDFSNLGTTLLR           | R | L | 95.00% | 93  |                               | 833.4233  | 2 | 9.0 | 71  | 84  | No  |
|     |             |        |                                                                                           | YEDFSNLGTTLLR           | R | L | 95.00% | 63  |                               | 555.9489  | 3 | 4.3 | 71  | 84  | No  |
| 440 | IPI00305978 | AKR7A2 | AFLATOXIN B1 ALDEHYDE REDUCTASE MEMBER 2.                                                 | ALQAAYGASAPSVTSAALR     | K | W | 95.00% | 89  |                               | 902.9885  | 2 | 7.4 | 279 | 297 | No  |
|     |             |        |                                                                                           | EHFHEIALVEK             | K | A | 95.00% | 44  |                               | 474.9186  | 3 | 1.4 | 267 | 278 | No  |
|     |             |        |                                                                                           | FYAYNPLAGLLTGK          | R | Y | 95.00% | 84  |                               | 792.9309  | 2 | 7.0 | 222 | 236 | No  |
|     |             |        |                                                                                           | VASVLGTMEMGR            | R | R | 95.00% | 44  | M8: Oxidation, M10: Oxidation | 641.8155  | 2 | 7.4 | 38  | 49  | No  |
| 441 | IPI00306301 | PDHA1  | PYRUVATE DEHYDROGENASE E1 COMPONENT ALPHA SUBUNIT, SOMATIC FORM, MITOCHONDRIAL PRECURSOR. | EIEDAAQFATADPEPPLEELGYH | K | G | 95.00% | 53  |                               | 1278.2790 | 3 | 9.4 | 345 | 378 | No  |
|     |             |        |                                                                                           | IYSSDPPFEVR             | R | K | 95.00% | 44  |                               | 1001.5730 | 1 | 9.4 | 133 | 141 | No  |
|     |             |        |                                                                                           | EILAEALTGR              | R | K | 95.00% | 60  |                               | 501.2876  | 2 | 4.1 | 133 | 141 | No  |
|     |             |        |                                                                                           | EILAEALTGR              | R | K | 95.00% | 60  |                               | 501.2876  | 2 | 4.1 | 133 | 141 | No  |
|     |             |        |                                                                                           | GPILMELQTYR             | K | Y | 95.00% | 60  | M5: Oxidation                 | 668.8545  | 2 | 5.6 | 278 | 288 | No  |
|     |             |        |                                                                                           | LEEGPPVTTVLTR           | R | E | 95.00% | 93  |                               | 706.3987  | 2 | 6.9 | 46  | 58  | No  |
|     |             |        |                                                                                           | MVNSNLASVEELK           | R | E | 95.00% | 69  | M1: Oxidation                 | 725.3733  | 2 | 8.9 | 324 | 336 | No  |
|     |             |        |                                                                                           | MVNSNLASVEELKEIDVEVR    | R | K | 95.00% | 124 | M1: Oxidation                 | 1145.5940 | 2 | 9.3 | 324 | 343 | No  |
|     |             |        |                                                                                           | MVNSNLASVEELKEIDVEVR    | R | K | 95.00% | 73  | M1: Oxidation                 | 764.0647  | 3 | 8.1 | 324 | 343 | No  |
|     |             |        |                                                                                           | MVNSNLASVEELKEIDVEVRK   | R | E | 95.00% | 50  | M1: Oxidation                 | 806.7636  | 3 | 8.4 | 324 | 344 | No  |
|     |             |        |                                                                                           | MVNSNLASVEELKEIDVEVRK   | R | E | 95.00% | 45  | M1: Oxidation                 | 605.3215  | 4 | 3.2 | 324 | 344 | No  |
|     |             |        |                                                                                           | NFANDATFEIK             | R | K | 95.00% | 38  |                               | 635.3127  | 2 | 4.8 | 29  | 39  | No  |
|     |             |        |                                                                                           | RGDFIPGLR               | K | V | 95.00% | 45  |                               | 515.7947  | 2 | 1.4 | 245 | 253 | No  |
|     |             |        |                                                                                           | SDPIMLLK                | K | D | 95.00% | 43  | M5: Oxidation                 | 466.7617  | 2 | 2.7 | 314 | 321 | No  |

|     |                          |        |                                                                                                                                                                                         |                      |   |   |        |     |                               |           |   |      |      |      |    |
|-----|--------------------------|--------|-----------------------------------------------------------------------------------------------------------------------------------------------------------------------------------------|----------------------|---|---|--------|-----|-------------------------------|-----------|---|------|------|------|----|
|     |                          |        |                                                                                                                                                                                         | SGKGPILMELQTYR       | R | Y | 95.00% | 55  | M8: Oxidation                 | 536.9530  | 3 | 0.8  | 275  | 288  | No |
|     |                          |        |                                                                                                                                                                                         | SKSDPIMLLK           | R | D | 95.00% | 45  | M7: Oxidation                 | 574.3256  | 2 | 3.0  | 312  | 321  | No |
|     |                          |        |                                                                                                                                                                                         | YGMGTSVER            | R | A | 95.00% | 46  | M3: Oxidation                 | 508.2297  | 2 | -0.3 | 227  | 235  | No |
|     |                          |        |                                                                                                                                                                                         | YHGHSMDPGVSYR        | R | T | 95.00% | 50  | M6: Oxidation                 | 536.9052  | 3 | 8.4  | 289  | 302  | No |
|     |                          |        |                                                                                                                                                                                         | YHGHSMDPGVSYR        | R | T | 95.00% | 46  | S5: Phospho, M6: Oxidation    | 563.5586  | 3 | 4.4  | 289  | 302  | No |
|     |                          |        |                                                                                                                                                                                         | YHGHSMDPGVSYR        | R | T | 95.00% | 32  | Y1: Phospho, M6: Oxidation    | 563.5594  | 3 | 5.9  | 289  | 302  | No |
|     |                          |        |                                                                                                                                                                                         | YHGHSMDPGVSYR        | R | T | 95.00% | 37  |                               | 531.5708  | 3 | 3.3  | 289  | 302  | No |
| 442 | IPI00306720; IPI00796142 | COX7A1 | CYTOCHROME C OXIDASE POLYPEPTIDE VIIA-HEART, MITOCHONDRIAL PRECURSOR.; PROTEIN.                                                                                                         | GGIVDNILYR           | K | V | 95.00% | 60  |                               | 560.3142  | 2 | 3.7  | 45   | 54   | No |
|     |                          |        |                                                                                                                                                                                         | LFQEDNDIPLYLK        | K | G | 95.00% | 90  |                               | 804.4280  | 2 | 9.9  | 32   | 44   | No |
| 443 | IPI00307749; IPI00419604 | NDUFS7 | NADH DEHYDROGENASE [UBIQUINONE] IRON-SULFUR PROTEIN 7, MITOCHONDRIALPRECURSOR.; CDNA FLJ34850 FIS. CLONE NT2NE2011758, HIGHLY SIMILAR TO NADH-UBIQUINONE OXIDOREDUCTASE 20 KDA SUBUNIT. | LDDLNVNWAR           | K | R | 95.00% | 71  |                               | 551.2930  | 2 | 8.0  | 74   | 82   | No |
|     |                          |        |                                                                                                                                                                                         | QSDVMIVAGTLTNK       | R | M | 95.00% | 97  | M5: Oxidation                 | 746.8953  | 2 | 9.7  | 123  | 136  | No |
|     |                          |        |                                                                                                                                                                                         | VYDQMPEPR            | K | Y | 95.00% | 42  | M5: Oxidation                 | 575.7694  | 2 | 9.2  | 144  | 152  | No |
| 444 | IPI00307755              | PRKAA2 | 5'-AMP-ACTIVATED PROTEIN KINASE CATALYTIC SUBUNIT ALPHA-2.                                                                                                                              | DLKPENVLLDAHNAK      | R | I | 95.00% | 40  | M13: Oxidation                | 608.6518  | 3 | 3.7  | 139  | 154  | No |
|     |                          |        |                                                                                                                                                                                         | GGVFIPEYLNLR         | R | S | 95.00% | 48  |                               | 714.3757  | 2 | 8.0  | 228  | 239  | No |
|     |                          |        |                                                                                                                                                                                         | IADFGLSNMMSDGEFLR    | K | T | 95.00% | 62  | M9: Oxidation, M10: Oxidation | 967.9431  | 2 | 7.9  | 155  | 171  | No |
|     |                          |        |                                                                                                                                                                                         | IGHYVLGDTLGVGTGFK    | K | V | 95.00% | 118 |                               | 867.4697  | 2 | 5.1  | 13   | 29   | No |
|     |                          |        |                                                                                                                                                                                         | IGHYVLGDTLGVGTGFK    | K | V | 95.00% | 43  |                               | 578.6494  | 3 | 5.6  | 13   | 29   | No |
|     |                          |        |                                                                                                                                                                                         | MSLQLYLVNDR          | K | S | 95.00% | 80  | M1: Oxidation                 | 684.3603  | 2 | 9.8  | 453  | 463  | No |
|     |                          |        |                                                                                                                                                                                         | SIDDEVVEQR           | K | S | 95.00% | 37  |                               | 595.2856  | 2 | -5.8 | 471  | 480  | No |
|     |                          |        |                                                                                                                                                                                         | SYLLDFK              | R | S | 95.00% | 29  |                               | 443.2410  | 2 | 2.1  | 464  | 470  | No |
| 445 | IPI00328156; IPI00639878 | MAOB   | AMINE OXIDASE [FLAVIN-CONTAINING] B.; MONOAMINE OXIDASE B.                                                                                                                              | ENVLVETLNHEMYEAK     | R | Y | 95.00% | 75  | M12: Oxidation                | 967.9665  | 2 | 4.2  | 243  | 258  | No |
|     |                          |        |                                                                                                                                                                                         | FVGGSGQVSR           | K | I | 95.00% | 68  |                               | 561.7823  | 2 | 2.2  | 210  | 220  | No |
|     |                          |        |                                                                                                                                                                                         | IHFNPPLPMMR          | K | N | 95.00% | 35  | M9: Oxidation, M10: Oxidation | 692.8504  | 2 | 4.2  | 272  | 282  | No |
|     |                          |        |                                                                                                                                                                                         | IMDLLGDR             | R | V | 95.00% | 36  | M2: Oxidation                 | 474.7480  | 2 | 5.9  | 221  | 228  | No |
|     |                          |        |                                                                                                                                                                                         | KFVGGSGQVSR          | R | I | 95.00% | 32  |                               | 417.5558  | 3 | 2.0  | 209  | 220  | No |
|     |                          |        |                                                                                                                                                                                         | LERPVIYDQTR          | K | E | 95.00% | 51  |                               | 751.9276  | 2 | 9.3  | 231  | 242  | No |
|     |                          |        |                                                                                                                                                                                         | LERPVIYDQTR          | K | E | 95.00% | 51  |                               | 501.6180  | 3 | 3.3  | 231  | 242  | No |
|     |                          |        |                                                                                                                                                                                         | LIGLTTIFSATALGFLAHK  | R | R | 95.00% | 118 |                               | 987.5809  | 2 | 5.5  | 495  | 513  | No |
|     |                          |        |                                                                                                                                                                                         | LIGLTTIFSATALGFLAHK  | R | R | 95.00% | 36  |                               | 658.7243  | 3 | 7.1  | 495  | 513  | No |
|     |                          |        |                                                                                                                                                                                         | LIGLTTIFSATALGFLAHKR | R | G | 95.00% | 34  |                               | 1065.6340 | 2 | 7.2  | 495  | 514  | No |
|     |                          |        |                                                                                                                                                                                         | LLHDSGLNVVLEAR       | K | D | 95.00% | 92  |                               | 817.9705  | 2 | 6.2  | 22   | 36   | No |
|     |                          |        |                                                                                                                                                                                         | LLHDSGLNVVLEAR       | K | D | 95.00% | 49  |                               | 545.6489  | 3 | 4.8  | 22   | 36   | No |
|     |                          |        |                                                                                                                                                                                         | PVIYIDQTR            | R | E | 95.00% | 40  |                               | 552.8073  | 2 | 1.2  | 234  | 242  | No |
|     |                          |        |                                                                                                                                                                                         | VKLERPVIYDQTR        | R | E | 95.00% | 35  |                               | 865.5080  | 2 | 6.6  | 229  | 242  | No |
|     |                          |        |                                                                                                                                                                                         | VKLERPVIYDQTR        | R | E | 95.00% | 37  |                               | 577.3392  | 3 | 3.0  | 229  | 242  | No |
|     |                          |        |                                                                                                                                                                                         | VLGSLEALEPVHYEEK     | K | N | 95.00% | 72  |                               | 906.9779  | 2 | 5.3  | 371  | 386  | No |
|     |                          |        |                                                                                                                                                                                         | VPLGSVIK             | R | C | 95.00% | 23  |                               | 812.5326  | 1 | 9.7  | 289  | 296  | No |
|     |                          |        |                                                                                                                                                                                         | VPLGSVIK             | R | C | 95.00% | 35  |                               | 406.7673  | 2 | 2.5  | 289  | 296  | No |
|     |                          |        |                                                                                                                                                                                         | YVDLGGSYVGPQTQNR     | K | I | 95.00% | 101 |                               | 813.4055  | 2 | 6.6  | 53   | 67   | No |
|     |                          |        |                                                                                                                                                                                         | YVISAIPPTLGMK        | K | I | 95.00% | 58  | M12: Oxidation                | 703.3962  | 2 | 5.6  | 259  | 271  | No |
| 446 | IPI00328318; IPI00514126 | AGL    | AMYLO-1,6-GLUCOSIDASE, 4-ALPHA-GLUCANOTRANSFERASE ISOFORM 1 VARIANT.; ISOFORM 1 OF GLYCOGEN DEBRANCHING ENZYME.                                                                         | AVTVYTYNYPFGGETFNR   | K | E | 95.00% | 116 |                               | 988.4905  | 2 | 9.0  | 44   | 60   | No |
|     |                          |        |                                                                                                                                                                                         | AVTVYTYNYPFGGETFNR   | K | E | 95.00% | 45  |                               | 659.3285  | 3 | 7.4  | 44   | 60   | No |
|     |                          |        |                                                                                                                                                                                         | DENSINGTPDITVEIR     | K | E | 95.00% | 109 |                               | 886.9415  | 2 | 4.6  | 792  | 807  | No |
|     |                          |        |                                                                                                                                                                                         | DGSAVEIVGLSK         | R | S | 95.00% | 62  |                               | 1174.6400 | 1 | 7.0  | 1280 | 1291 | No |
|     |                          |        |                                                                                                                                                                                         | DGSAVEIVGLSK         | R | S | 95.00% | 94  |                               | 587.8210  | 2 | 1.8  | 1282 | 1293 | No |
|     |                          |        |                                                                                                                                                                                         | DTFIALR              | R | G | 95.00% | 30  |                               | 835.4741  | 1 | 7.3  | 1102 | 1108 | No |
|     |                          |        |                                                                                                                                                                                         | DTFIALR              | R | G | 95.00% | 47  |                               | 418.2388  | 2 | 2.2  | 1102 | 1108 | No |
|     |                          |        |                                                                                                                                                                                         | EAMSAYNSHEEGR        | R | L | 95.00% | 31  | M3: Oxidation                 | 748.8109  | 2 | 4.4  | 580  | 592  | No |
|     |                          |        |                                                                                                                                                                                         | ESGYNMIHFTPLQTLGLSR  | K | S | 95.00% | 54  | M6: Oxidation                 | 1090.5550 | 2 | 9.9  | 152  | 170  | No |
|     |                          |        |                                                                                                                                                                                         | ESGYNMIHFTPLQTLGLSR  | K | S | 95.00% | 36  | M6: Oxidation                 | 727.3711  | 3 | 7.6  | 152  | 170  | No |
|     |                          |        |                                                                                                                                                                                         | ESGYNMIHFTPLQTLGLSR  | K | S | 95.00% | 94  |                               | 1082.5540 | 2 | 6.1  | 152  | 170  | No |
|     |                          |        |                                                                                                                                                                                         | FPSLPILSPALMDVPYR    | K | L | 95.00% | 81  | M12: Oxidation                | 966.5261  | 2 | 7.1  | 1053 | 1069 | No |
|     |                          |        |                                                                                                                                                                                         | FPSLPILSPALMDVPYR    | K | L | 95.00% | 42  | M12: Oxidation                | 644.6863  | 3 | 6.6  | 1053 | 1069 | No |
|     |                          |        |                                                                                                                                                                                         | FPSLPILSPALMDVPYR    | K | L | 95.00% | 85  |                               | 958.5308  | 2 | 9.4  | 1055 | 1071 | No |

|                           |   |   |        |     |                                  |           |   |      |      |      |    |
|---------------------------|---|---|--------|-----|----------------------------------|-----------|---|------|------|------|----|
| GFIQVYVDQVDEDIVAVTR       | K | H | 95.00% | 161 |                                  | 1083.5660 | 2 | 7.4  | 716  | 734  | No |
| GFIQVYVDQVDEDIVAVTR       | K | H | 95.00% | 80  |                                  | 722.7124  | 3 | 6.1  | 716  | 734  | No |
| GILLITGR                  | R | Y | 95.00% | 32  |                                  | 842.5494  | 1 | 3.3  | 1109 | 1116 | No |
| GILLITGR                  | R | Y | 95.00% | 57  |                                  | 421.7780  | 2 | 1.9  | 1109 | 1116 | No |
| GIPALIENDHHMNSIR          | K | K | 95.00% | 62  | M12: Oxidation                   | 916.9628  | 2 | 5.5  | 270  | 285  | No |
| GPNEYIQEIEFENLSPGSVIIFR   | K | V | 95.00% | 62  |                                  | 884.4590  | 3 | 9.9  | 827  | 849  | No |
| GYDELVPHQISVVSEER         | R | F | 95.00% | 92  |                                  | 978.9932  | 2 | 6.1  | 659  | 675  | No |
| GYDELVPHQISVVSEER         | R | F | 95.00% | 91  |                                  | 652.9982  | 3 | 6.2  | 660  | 676  | No |
| HGLIPNLLGEGIYAR           | R | Y | 95.00% | 75  |                                  | 811.9597  | 2 | 5.7  | 1133 | 1147 | No |
| HGLIPNLLGEGIYAR           | R | Y | 95.00% | 66  |                                  | 541.6407  | 3 | 2.6  | 1135 | 1149 | No |
| HSPSIHQSVVAVSR            | R | T | 95.00% | 100 |                                  | 752.4082  | 2 | 3.7  | 735  | 748  | No |
| HSPSIHQSVVAVSR            | R | T | 95.00% | 61  |                                  | 501.9410  | 3 | 2.8  | 737  | 750  | No |
| IEEVVLEAR                 | K | T | 95.00% | 69  |                                  | 529.3026  | 2 | 7.4  | 774  | 782  | No |
| IIWEDIFPK                 | K | L | 95.00% | 50  |                                  | 580.8257  | 2 | 6.7  | 287  | 295  | No |
| ILLNEMEK                  | R | L | 95.00% | 32  | M7: Oxidation                    | 559.8143  | 2 | 6.8  | 10   | 18   | No |
| ILLNEMEKLEK               | R | T | 95.00% | 33  | M7: Oxidation                    | 744.9228  | 2 | 1.9  | 9    | 20   | No |
| ILLNEMEKLEK               | R | T | 95.00% | 57  |                                  | 736.9261  | 2 | 3.0  | 9    | 20   | No |
| IPFASLASR                 | K | L | 95.00% | 41  |                                  | 961.5505  | 1 | 3.6  | 890  | 898  | No |
| IPFASLASR                 | K | L | 95.00% | 70  |                                  | 481.2791  | 2 | 3.4  | 890  | 898  | No |
| KDENSINGTPDITVEIR         | R | E | 95.00% | 132 |                                  | 950.9925  | 2 | 8.1  | 791  | 807  | No |
| KDENSINGTPDITVEIR         | R | E | 95.00% | 51  |                                  | 634.3284  | 3 | 4.0  | 791  | 807  | No |
| KIIWEDIFPK                | R | L | 95.00% | 68  |                                  | 644.8738  | 2 | 6.9  | 286  | 295  | No |
| KIIWEDIFPK                | R | L | 95.00% | 50  |                                  | 430.2508  | 3 | 4.5  | 286  | 295  | No |
| KNIFPYHEVTVK              | K | R | 95.00% | 30  |                                  | 492.2761  | 3 | 4.6  | 1305 | 1316 | No |
| KYTEITATYFQGVV            | K | L | 95.00% | 79  |                                  | 838.9401  | 2 | 4.5  | 511  | 524  | No |
| KYTEITATYFQGVV            | K | L | 95.00% | 45  |                                  | 559.6305  | 3 | 6.6  | 511  | 524  | No |
| KYTWNVDVQQLVEK            | R | L | 95.00% | 105 |                                  | 790.4136  | 2 | 4.6  | 191  | 203  | No |
| KYTWNVDVQQLVEK            | R | L | 95.00% | 45  |                                  | 527.2787  | 3 | 5.4  | 191  | 203  | No |
| LEQGYELQFR                | R | L | 95.00% | 68  |                                  | 641.8278  | 2 | 3.4  | 25   | 34   | No |
| LFHVSEDPDLNEK             | K | H | 95.00% | 65  |                                  | 815.3980  | 2 | 7.4  | 1338 | 1351 | No |
| LFHVSEDPDLNEK             | K | H | 95.00% | 31  |                                  | 543.9335  | 3 | 5.5  | 1340 | 1353 | No |
| LFHVSEDPDLNEKHPNLVHK      | K | R | 95.00% | 32  |                                  | 819.0911  | 3 | 8.6  | 1340 | 1360 | No |
| LGISLIR                   | R | E | 95.00% | 68  |                                  | 429.7762  | 2 | 3.9  | 572  | 579  | No |
| LGPTLQK                   | R | A | 95.00% | 34  |                                  | 407.2470  | 2 | 3.2  | 36   | 43   | No |
| LMGPETTAK                 | R | T | 95.00% | 44  | M2: Oxidation                    | 482.2478  | 2 | 5.7  | 1468 | 1476 | No |
| LTLAELNQILYR              | R | C | 95.00% | 80  |                                  | 723.9253  | 2 | 7.4  | 899  | 910  | No |
| LTLAELNQILYR              | R | C | 95.00% | 61  |                                  | 482.9526  | 3 | 6.9  | 901  | 912  | No |
| LWEFFQVDVVK               | K | A | 95.00% | 86  |                                  | 712.8708  | 2 | 8.7  | 298  | 308  | No |
| MYPTDSDAPLPAAGTLDDQPLFEVI |   |   |        |     | M1: Oxidation,<br>M27: Oxidation |           |   |      |      |      |    |
| QEAMQK                    | R | H | 95.00% | 63  |                                  | 1079.8610 | 3 | 10.0 | 1182 | 1210 | No |
| NFAEPGSEVYLR              | R | R | 95.00% | 81  |                                  | 691.3443  | 2 | 4.0  | 471  | 482  | No |
| NHLTQFSPHFK               | R | S | 95.00% | 70  |                                  | 678.3500  | 2 | 4.5  | 865  | 875  | No |
| NHLTQFSPHFK               | R | S | 95.00% | 52  |                                  | 452.5691  | 3 | 4.1  | 865  | 875  | No |
| NIFPYHEVTVK               | K | R | 95.00% | 42  |                                  | 673.8632  | 2 | 5.6  | 1304 | 1314 | No |
| NIILAFAGTLR               | R | H | 95.00% | 103 |                                  | 594.8631  | 2 | 6.6  | 1122 | 1132 | No |
| NMKDEGFNITAGVDEETGFVYG    |   |   |        |     |                                  |           |   |      |      |      |    |
| GNR                       | R | F | 95.00% | 78  | M2: Oxidation                    | 912.7546  | 3 | 9.9  | 1231 | 1255 | No |
| QMSSFVQNGSTFVK            | K | H | 95.00% | 45  | M2: Oxidation                    | 788.3793  | 2 | 1.9  | 1027 | 1040 | No |
| QMSSFVQNGSTFVK            | K | H | 95.00% | 65  |                                  | 780.3842  | 2 | 4.9  | 1025 | 1038 | No |
| SDPNQHLLTIQDPEYR          | K | R | 95.00% | 80  |                                  | 963.4762  | 2 | 4.5  | 327  | 342  | No |
| SDPNQHLLTIQDPEYR          | K | R | 95.00% | 52  |                                  | 642.6531  | 3 | 4.1  | 327  | 342  | No |
| SGDWMIDYVSNR              | R | L | 95.00% | 76  | M5: Oxidation                    | 729.8240  | 2 | 5.4  | 962  | 973  | No |
| SGDWMIDYVSNR              | R | L | 95.00% | 67  |                                  | 721.8262  | 2 | 4.9  | 962  | 973  | No |
| SGGGYIVDPILR              | K | V | 95.00% | 87  |                                  | 673.3792  | 2 | 1.8  | 103  | 115  | No |
| SGSLAVDNADPILK            | K | I | 95.00% | 86  |                                  | 700.3780  | 2 | 3.3  | 876  | 889  | No |
| SGSLAVDNADPILKIPFASLASR   | K | L | 95.00% | 36  |                                  | 781.4365  | 3 | 9.4  | 878  | 900  | No |
| SLDWENPTER                | R | E | 95.00% | 45  |                                  | 623.7907  | 2 | 2.4  | 64   | 73   | No |
| TIVLVK                    | K | N | 95.00% | 25  |                                  | 672.4686  | 1 | 3.7  | 1479 | 1484 | No |
| VSLDPHAQVAVGILR           | R | N | 95.00% | 85  |                                  | 787.9604  | 2 | 7.0  | 850  | 864  | No |
| VSLDPHAQVAVGILR           | R | N | 95.00% | 69  |                                  | 525.6409  | 3 | 3.1  | 850  | 864  | No |
| VSYDEWNR                  | K | K | 95.00% | 57  |                                  | 534.7439  | 2 | 4.7  | 1324 | 1331 | No |
| WLLELSK                   | R | K | 95.00% | 32  |                                  | 444.7652  | 2 | 3.4  | 1296 | 1302 | No |
| WNPEALPSNTGEVNFQSGIIAAR   | K | C | 95.00% | 64  |                                  | 1236.1270 | 2 | 5.5  | 680  | 702  | No |
| WNPEALPSNTGEVNFQSGIIAAR   | K | C | 95.00% | 55  |                                  | 824.4214  | 3 | 6.8  | 680  | 702  | No |
| YAGLQGLMSVLAIEIRPK        | K | N | 95.00% | 67  | M8: Oxidation                    | 931.5231  | 2 | 9.3  | 933  | 949  | No |
| YAGLQGLMSVLAIEIRPK        | K | N | 95.00% | 55  | M8: Oxidation                    | 621.3492  | 3 | 5.8  | 933  | 949  | No |
| YAGLQGLMSVLAIEIRPK        | K | N | 95.00% | 89  |                                  | 923.5254  | 2 | 9.1  | 933  | 949  | No |

|     |                                       |        |                                                                                                    |                        |   |   |        |     |                    |           |   |     |     |     |    |
|-----|---------------------------------------|--------|----------------------------------------------------------------------------------------------------|------------------------|---|---|--------|-----|--------------------|-----------|---|-----|-----|-----|----|
|     |                                       |        |                                                                                                    | YAGLQGLMSVLAEIRPK      | K | N | 95.00% | 61  |                    | 616.0158  | 3 | 3.0 | 933 | 949 | No |
|     |                                       |        |                                                                                                    | YTEITATYFQGVK          | K | L | 95.00% | 56  |                    | 774.8965  | 2 | 9.9 | 513 | 525 | No |
|     |                                       |        |                                                                                                    | YTWNQVQQLVEK           | K | L | 95.00% | 81  |                    | 726.3665  | 2 | 5.6 | 193 | 204 | No |
|     |                                       |        | ISOFORM 1 OF EUKARYOTIC INITIATION FACTOR 4A-II.; ISOFORM 2 OF EUKARYOTIC INITIATION FACTOR 4A-II. |                        |   |   |        |     |                    |           |   |     |     |     |    |
| 447 | IPI00328328; IPI00409717              | EIF4A2 |                                                                                                    | DFTVSALHGDMDQK         | R | E | 95.00% | 38  | M11: Oxidation     | 790.3640  | 2 | 8.7 | 297 | 310 | No |
|     |                                       |        |                                                                                                    | ETQALVLAPTR            | K | E | 95.00% | 39  |                    | 599.8453  | 2 | 2.6 | 101 | 111 | No |
|     |                                       |        |                                                                                                    | GFKDDIYEIFQK           | R | L | 95.00% | 67  |                    | 758.4024  | 2 | 8.0 | 192 | 203 | No |
|     |                                       |        |                                                                                                    | GFKDDIYEIFQK           | R | L | 95.00% | 40  |                    | 505.9362  | 3 | 5.3 | 192 | 203 | No |
|     |                                       |        |                                                                                                    | GIYAYGFEKPSAIQQR       | R | A | 95.00% | 86  |                    | 914.4799  | 2 | 6.8 | 47  | 62  | No |
|     |                                       |        |                                                                                                    | GIYAYGFEKPSAIQQR       | R | A | 95.00% | 60  |                    | 609.9871  | 3 | 3.4 | 47  | 62  | No |
|     |                                       |        |                                                                                                    | GYDVIAQAQSGTGK         | K | T | 95.00% | 104 |                    | 697.8531  | 2 | 4.8 | 70  | 83  | No |
|     |                                       |        |                                                                                                    | KEELTLEGIK             | K | Q | 95.00% | 40  |                    | 580.3350  | 2 | 3.8 | 239 | 248 | No |
|     |                                       |        |                                                                                                    | KGVAINFVTEEDKR         | R | I | 95.00% | 36  |                    | 803.4403  | 2 | 7.8 | 370 | 383 | No |
|     |                                       |        |                                                                                                    | KGVAINFVTEEDKR         | R | I | 95.00% | 59  |                    | 535.9606  | 3 | 3.8 | 370 | 383 | No |
|     |                                       |        |                                                                                                    | LQAEAPHIVVGTGPR        | K | V | 95.00% | 79  |                    | 772.9384  | 2 | 8.9 | 148 | 162 | No |
|     |                                       |        |                                                                                                    | LQAEAPHIVVGTGPR        | K | V | 95.00% | 43  |                    | 515.6255  | 3 | 3.6 | 148 | 162 | No |
|     |                                       |        |                                                                                                    | MFVLDEADEMSLR          | K | G | 95.00% | 89  | M1: Oxidation,     |           |   |     |     |     |    |
|     |                                       |        |                                                                                                    | VLITDILLAR             | R | G | 95.00% | 50  | M10: Oxidation     | 794.3610  | 2 | 6.7 | 179 | 191 | No |
|     |                                       |        |                                                                                                    |                        |   |   |        |     |                    | 557.8507  | 2 | 8.8 | 326 | 335 | No |
|     |                                       |        | ISOFORM 2 OF SARCALUMENIN PRECURSOR.; ISOFORM 1 OF SARCALUMENIN PRECURSOR.                         |                        |   |   |        |     |                    |           |   |     |     |     |    |
| 448 | IPI00328534; IPI00658052              | SRL    |                                                                                                    | ADLIFVVFDPK            | R | L | 95.00% | 78  |                    | 682.8831  | 2 | 8.4 | 677 | 688 | No |
|     |                                       |        |                                                                                                    | ADNLATQMLMR            | K | V | 95.00% | 57  | M8: Oxidation,     |           |   |     |     |     |    |
|     |                                       |        |                                                                                                    | AITQELPGLLGLGK         | R | N | 95.00% | 119 | M10: Oxidation     | 648.3099  | 2 | 2.5 | 641 | 651 | No |
|     |                                       |        |                                                                                                    | AITQELPGLLGLGK         | R | N | 95.00% | 77  |                    | 833.9955  | 2 | 5.1 | 818 | 834 | No |
|     |                                       |        |                                                                                                    | DFFGINPISSFK           | K | L | 95.00% | 48  |                    | 556.3329  | 3 | 5.0 | 818 | 834 | No |
|     |                                       |        |                                                                                                    | DIVEDPKFYIFK           | K | T | 95.00% | 65  |                    | 686.3553  | 2 | 5.8 | 787 | 798 | No |
|     |                                       |        |                                                                                                    | DKMTFFSDGELVFK         | K | D | 95.00% | 43  |                    | 814.9201  | 2 | 6.8 | 829 | 841 | No |
|     |                                       |        |                                                                                                    | DKMTFFSDGELVFK         | K | D | 95.00% | 45  | M3: Oxidation      | 840.4080  | 2 | 5.3 | 815 | 828 | No |
|     |                                       |        |                                                                                                    | EAYKDFGINPISSFK        | R | L | 95.00% | 96  | M3: Oxidation      | 560.6079  | 3 | 5.3 | 815 | 828 | No |
|     |                                       |        |                                                                                                    | EAYKDFGINPISSFK        | R | L | 95.00% | 55  |                    | 931.9778  | 2 | 7.9 | 783 | 798 | No |
|     |                                       |        |                                                                                                    | EPQEAPEPQGAELPEATGTTT  | R | D | 95.00% | 69  |                    | 621.6522  | 3 | 4.3 | 783 | 798 | No |
|     |                                       |        |                                                                                                    | HR                     | R | D | 95.00% | 32  |                    | 874.0862  | 3 | 7.3 | 413 | 436 | No |
|     |                                       |        |                                                                                                    | EPQGAELPEATGTTSHR      | R | D | 95.00% | 32  |                    | 637.3034  | 3 | 2.7 | 419 | 436 | No |
|     |                                       |        |                                                                                                    | ESPIIVAEETEDANEEAPLRDR | R | S | 95.00% | 52  |                    | 871.0947  | 3 | 7.5 | 472 | 494 | No |
|     |                                       |        |                                                                                                    | FGQNFLEK               | K | L | 95.00% | 72  |                    | 491.7558  | 2 | 4.0 | 624 | 631 | No |
|     |                                       |        |                                                                                                    | IHALLVDR               | R | Y | 95.00% | 46  |                    | 936.5722  | 1 | 9.6 | 801 | 808 | No |
|     |                                       |        |                                                                                                    | IHALLVDR               | R | Y | 95.00% | 45  |                    | 468.7859  | 2 | 0.8 | 726 | 733 | No |
|     |                                       |        |                                                                                                    | IYHSSIKPLEQSYK         | K | Y | 95.00% | 62  |                    | 846.9589  | 2 | 8.2 | 447 | 460 | No |
|     |                                       |        |                                                                                                    | IYHSSIKPLEQSYK         | K | Y | 95.00% | 43  |                    | 564.9733  | 3 | 4.8 | 522 | 535 | No |
|     |                                       |        |                                                                                                    | KIYHSSIKPLEQSYK        | R | Y | 95.00% | 99  |                    | 911.0022  | 2 | 3.0 | 446 | 460 | No |
|     |                                       |        |                                                                                                    | KIYHSSIKPLEQSYK        | R | Y | 95.00% | 44  |                    | 607.6709  | 3 | 3.3 | 521 | 535 | No |
|     |                                       |        |                                                                                                    | LDVGLELEMLFR           | K | Q | 95.00% | 76  | M9: Oxidation      | 725.8888  | 2 | 5.6 | 689 | 700 | No |
|     |                                       |        |                                                                                                    | LIGIEVPHK              | K | L | 95.00% | 68  |                    | 503.3106  | 2 | 3.5 | 557 | 565 | No |
|     |                                       |        |                                                                                                    | LLLHYPDGR              | K | E | 95.00% | 28  |                    | 542.3060  | 2 | 8.2 | 66  | 74  | No |
|     |                                       |        |                                                                                                    | MTFFSDGELVFK           | K | D | 95.00% | 75  | M1: Oxidation      | 718.8466  | 2 | 5.8 | 742 | 753 | No |
|     |                                       |        |                                                                                                    | STMINYLLGLENTR         | K | Y | 95.00% | 87  | M3: Oxidation      | 820.9267  | 2 | 8.4 | 566 | 579 | No |
|     |                                       |        |                                                                                                    | STMINYLLGLENTR         | K | Y | 95.00% | 49  | M3: Oxidation      | 547.6190  | 3 | 5.9 | 491 | 504 | No |
|     |                                       |        |                                                                                                    | STMINYLLGLENTR         | K | Y | 95.00% | 55  |                    | 812.9294  | 2 | 8.6 | 491 | 504 | No |
|     |                                       |        |                                                                                                    | TIEGIVMAADSAR          | K | S | 95.00% | 98  | M7: Oxidation      | 675.3431  | 2 | 3.6 | 604 | 616 | No |
|     |                                       |        |                                                                                                    | TIEGIVMAADSAR          | K | S | 95.00% | 53  | M7: Oxidation      | 450.5657  | 3 | 5.8 | 529 | 541 | No |
|     |                                       |        |                                                                                                    | TLMLNEDKPSDDYSAVLQR    | K | L | 95.00% | 121 | M3: Oxidation      | 1106.0420 | 2 | 7.2 | 425 | 443 | No |
|     |                                       |        |                                                                                                    | TLMLNEDKPSDDYSAVLQR    | K | L | 95.00% | 69  | M3: Oxidation      | 737.6957  | 3 | 5.0 | 425 | 443 | No |
|     |                                       |        |                                                                                                    | VTFVDTPGIENR           | R | K | 95.00% | 80  |                    | 730.8961  | 2 | 6.4 | 570 | 582 | No |
|     |                                       |        | 127 KDA PROTEIN.; IMPORTIN BETA-3.; RAN BINDING PROTEIN 5.                                         |                        |   |   |        |     |                    |           |   |     |     |     |    |
| 449 | IPI00329200; IPI00783829; IPI00793443 | RANBP5 |                                                                                                    | YQLTYGAEPPTSEFTVLMHGPK | R | L | 95.00% | 47  | M18: Oxidation     | 829.4097  | 3 | 8.8 | 580 | 601 | No |
|     |                                       |        |                                                                                                    | ATAAFILANEHNVALFK      | R | H | 95.00% | 39  |                    | 610.6727  | 3 | 6.1 | 214 | 230 | No |
|     |                                       |        |                                                                                                    | EFQQYLPVVMGLMK         | K | T | 95.00% | 33  | M10: Oxidation,    |           |   |     |     |     |    |
|     |                                       |        |                                                                                                    | EGFVEYTEQVVK           | K | L | 95.00% | 50  | M14: Oxidation     | 906.4655  | 2 | 8.5 | 636 | 650 | No |
|     |                                       |        |                                                                                                    | FLFDSVSSQNVGLR         | K | E | 95.00% | 89  |                    | 714.3618  | 2 | 6.9 | 712 | 723 | No |
|     |                                       |        |                                                                                                    |                        |   |   |        |     |                    | 784.9125  | 2 | 6.5 | 153 | 166 | No |
|     |                                       |        |                                                                                                    | FMQDASDVMQLLKK         | K | T | 95.00% | 85  | M2: Oxidation, M9: |           |   |     |     |     |    |
|     |                                       |        |                                                                                                    | FVPYDLMFMSLKK          | K | H | 95.00% | 33  | Oxidation          | 835.9184  | 2 | 9.3 | 591 | 604 | No |
|     |                                       |        |                                                                                                    | ITFLLQAIR              | K | N | 95.00% | 80  | M9: Oxidation      | 818.4186  | 2 | 9.9 | 545 | 557 | No |
|     |                                       |        |                                                                                                    | LVLEQVTSIASVADTAEK     | K | F | 95.00% | 89  |                    | 537.8409  | 2 | 5.8 | 60  | 68  | No |
|     |                                       |        |                                                                                                    |                        |   |   |        |     |                    | 701.3831  | 3 | 5.0 | 525 | 544 | No |

|     |                                       |        |                                                                                                                                                                 |                           |   |   |        |     |                                              |           |   |      |      |      |    |
|-----|---------------------------------------|--------|-----------------------------------------------------------------------------------------------------------------------------------------------------------------|---------------------------|---|---|--------|-----|----------------------------------------------|-----------|---|------|------|------|----|
|     |                                       |        |                                                                                                                                                                 | NLIDEDGNNQWPEGLK          | R | F | 95.00% | 56  |                                              | 921.4415  | 2 | 4.2  | 137  | 152  | No |
|     |                                       |        |                                                                                                                                                                 | QAEETYENIPGQSK            | K | I | 95.00% | 61  |                                              | 797.3793  | 2 | 6.8  | 46   | 59   | No |
|     |                                       |        |                                                                                                                                                                 |                           |   |   |        |     | M5: Oxidation, M9: Oxidation, M15: Oxidation |           |   |      |      |      |    |
|     |                                       |        |                                                                                                                                                                 | SELLMIQMETQSSMR           | K | K | 95.00% | 42  |                                              | 648.9799  | 3 | 8.1  | 109  | 124  | No |
|     |                                       |        |                                                                                                                                                                 | SLLIPYLDNLVK              | K | H | 95.00% | 41  |                                              | 694.4163  | 2 | 3.3  | 494  | 505  | No |
|     |                                       |        |                                                                                                                                                                 | SLVEIADTVPK               | K | Y | 95.00% | 53  |                                              | 586.3342  | 2 | 2.6  | 257  | 267  | No |
|     |                                       |        |                                                                                                                                                                 | VSDILHSIFSSYK             | K | E | 95.00% | 43  |                                              | 499.2669  | 3 | 3.7  | 868  | 880  | No |
| 450 | IPI00329331                           | UGP2   | ISOFORM 1 OF UTP--GLUCOSE-1-PHOSPHATE URIDYLTRANSFERASE 2.                                                                                                      | AMSQDGASQFQEVIR           | K | Q | 95.00% | 114 | M2: Oxidation                                | 841.8988  | 2 | 5.3  | 11   | 25   | No |
|     |                                       |        |                                                                                                                                                                 | EFPTVPLVK                 | R | L | 95.00% | 28  |                                              | 1029.6060 | 1 | 7.4  | 423  | 431  | No |
|     |                                       |        |                                                                                                                                                                 | ESLLPVAK                  | K | D | 95.00% | 32  |                                              | 428.7620  | 2 | 2.0  | 199  | 206  | No |
|     |                                       |        |                                                                                                                                                                 | GLPDNISSVLNK              | R | L | 95.00% | 83  |                                              | 628.8452  | 2 | -2.0 | 96   | 107  | No |
|     |                                       |        |                                                                                                                                                                 | GPSVDWGK                  | K | I | 95.00% | 43  |                                              | 423.2140  | 2 | 5.1  | 70   | 77   | No |
|     |                                       |        |                                                                                                                                                                 | GTVIIIANHGDR              | K | I | 95.00% | 57  |                                              | 633.3575  | 2 | 8.3  | 474  | 485  | No |
|     |                                       |        |                                                                                                                                                                 | GTVIIIANHGDR              | K | I | 95.00% | 47  |                                              | 422.5719  | 3 | 2.6  | 474  | 485  | No |
|     |                                       |        |                                                                                                                                                                 | GTVIIIANHGDRIDIPPGAVLENK  | K | I | 95.00% | 64  |                                              | 838.1394  | 3 | 5.3  | 474  | 497  | No |
|     |                                       |        |                                                                                                                                                                 | IDIPPGAVLENK              | R | I | 95.00% | 61  |                                              | 633.3625  | 2 | 5.1  | 486  | 497  | No |
|     |                                       |        |                                                                                                                                                                 | IFNTNNLWISLAAVK           | K | R | 95.00% | 107 |                                              | 852.4859  | 2 | 9.1  | 326  | 340  | No |
|     |                                       |        |                                                                                                                                                                 | IFNTNNLWISLAAVK           | K | R | 95.00% | 41  |                                              | 568.6567  | 3 | 3.4  | 326  | 340  | No |
|     |                                       |        |                                                                                                                                                                 | ILTTASSHEFEHTK            | K | K | 95.00% | 78  |                                              | 800.9034  | 2 | 1.2  | 39   | 52   | No |
|     |                                       |        |                                                                                                                                                                 | ILTTASSHEFEHTKK           | K | D | 95.00% | 67  |                                              | 864.9529  | 2 | 3.5  | 39   | 53   | No |
|     |                                       |        |                                                                                                                                                                 | ILTTASSHEFEHTKK           | K | D | 95.00% | 42  |                                              | 576.9708  | 3 | 2.8  | 39   | 53   | No |
|     |                                       |        |                                                                                                                                                                 | INKESLLPVAK               | R | D | 95.00% | 67  |                                              | 606.3744  | 2 | 3.8  | 196  | 206  | No |
|     |                                       |        |                                                                                                                                                                 | INKESLLPVAK               | R | D | 95.00% | 31  |                                              | 404.5852  | 3 | 2.9  | 196  | 206  | No |
|     |                                       |        |                                                                                                                                                                 | IQRPPEDSIQPYEK            | K | I | 95.00% | 73  |                                              | 850.4388  | 2 | 2.4  | 78   | 91   | No |
|     |                                       |        |                                                                                                                                                                 | IQRPPEDSIQPYEK            | K | I | 95.00% | 63  |                                              | 567.2954  | 3 | 2.9  | 78   | 91   | No |
|     |                                       |        |                                                                                                                                                                 | IYTFNQSR                  | K | Y | 95.00% | 38  |                                              | 514.7635  | 2 | 2.6  | 185  | 192  | No |
|     |                                       |        |                                                                                                                                                                 | LQEQNAIDMEIIVNAK          | R | T | 95.00% | 80  | M9: Oxidation                                | 922.9810  | 2 | 6.2  | 342  | 357  | No |
|     |                                       |        |                                                                                                                                                                 | LQEQNAIDMEIIVNAK          | R | T | 95.00% | 53  | M9: Oxidation                                | 615.6563  | 3 | 5.6  | 342  | 357  | No |
|     |                                       |        |                                                                                                                                                                 | LVEIAQVPK                 | R | A | 95.00% | 39  |                                              | 996.6146  | 1 | 5.2  | 304  | 312  | No |
|     |                                       |        |                                                                                                                                                                 | LVEIAQVPK                 | R | A | 95.00% | 56  |                                              | 498.8101  | 2 | 2.9  | 304  | 312  | No |
|     |                                       |        |                                                                                                                                                                 | NENTFLDLTVQQIEHLNK        | R | T | 95.00% | 123 |                                              | 1078.5630 | 2 | 8.5  | 134  | 151  | No |
|     |                                       |        |                                                                                                                                                                 | NENTFLDLTVQQIEHLNK        | R | T | 95.00% | 48  |                                              | 719.3762  | 3 | 6.5  | 134  | 151  | No |
|     |                                       |        |                                                                                                                                                                 | RFESIPDMLELDHLTVSGDVTFGK  | R | N | 95.00% | 92  | M8: Oxidation                                | 908.1250  | 3 | 7.2  | 445  | 468  | No |
|     |                                       |        |                                                                                                                                                                 | RLQEQNAIDMEIIVNAK         | K | T | 95.00% | 41  | M10: Oxidation                               | 667.6891  | 3 | 3.8  | 341  | 357  | No |
|     |                                       |        |                                                                                                                                                                 | SFENSLGINVPR              | K | S | 95.00% | 79  |                                              | 666.8523  | 2 | 4.1  | 378  | 389  | No |
|     |                                       |        |                                                                                                                                                                 | SFENSLGINVPR              | K | S | 95.00% | 47  |                                              | 444.9037  | 3 | 3.1  | 378  | 389  | No |
|     |                                       |        |                                                                                                                                                                 | TLDGGLNVIQLETAVGAAIK      | K | S | 95.00% | 133 |                                              | 992.0695  | 2 | 9.2  | 358  | 377  | No |
|     |                                       |        |                                                                                                                                                                 | TLDGGLNVIQLETAVGAAIK      | K | S | 95.00% | 72  |                                              | 661.7142  | 3 | 7.1  | 358  | 377  | No |
|     |                                       |        |                                                                                                                                                                 | TTSDLLVMSNLYSLNAGSLTMS EK | K | R | 95.00% | 63  | M9: Oxidation, M22: Oxidation                | 907.4588  | 3 | 8.8  | 397  | 421  | No |
|     |                                       |        |                                                                                                                                                                 | TYNTDVPLVLMNSFNTDEDTKK    | K | I | 95.00% | 48  | M11: Oxidation                               | 854.4149  | 3 | 8.2  | 152  | 173  | No |
| 451 | IPI00329572; IPI00783170              | PACSN3 | 49 KDA PROTEIN.; PROTEIN KINASE C AND CASEIN KINASE SUBSTRATE IN NEURONS PROTEIN 3.                                                                             | ADSAVSQEQLR               | K | K | 95.00% | 44  |                                              | 602.3041  | 2 | 2.9  | 176  | 186  | No |
|     |                                       |        |                                                                                                                                                                 | ALYDYAGQEADELSFR          | R | A | 95.00% | 121 |                                              | 924.4346  | 2 | 8.7  | 371  | 386  | No |
|     |                                       |        |                                                                                                                                                                 | ALYDYAGQEADELSFR          | R | A | 95.00% | 71  |                                              | 616.6241  | 3 | 6.2  | 371  | 386  | No |
|     |                                       |        |                                                                                                                                                                 | AQYEQTLAELHR              | K | Y | 95.00% | 69  |                                              | 729.8729  | 2 | 2.5  | 204  | 215  | No |
|     |                                       |        |                                                                                                                                                                 | AQYEQTLAELHR              | K | Y | 95.00% | 45  |                                              | 486.9181  | 3 | 3.1  | 204  | 215  | No |
|     |                                       |        |                                                                                                                                                                 | AYAQLADWAR                | K | K | 95.00% | 72  |                                              | 646.8269  | 2 | 5.6  | 52   | 62   | No |
|     |                                       |        |                                                                                                                                                                 | DLHQGIEAASDEEDLR          | R | W | 95.00% | 100 |                                              | 899.4211  | 2 | 4.8  | 267  | 282  | No |
|     |                                       |        |                                                                                                                                                                 | DLHQGIEAASDEEDLR          | R | W | 95.00% | 52  |                                              | 599.9496  | 3 | 4.2  | 267  | 282  | No |
|     |                                       |        |                                                                                                                                                                 | DMLLTLHQHLDLSSSEK         | K | F | 95.00% | 38  | M2: Oxidation                                | 661.6708  | 3 | 5.5  | 244  | 260  | No |
|     |                                       |        |                                                                                                                                                                 | GAFHRPVLGGFR              | R | E | 95.00% | 36  |                                              | 657.3679  | 2 | 3.6  | 116  | 127  | No |
|     |                                       |        |                                                                                                                                                                 | LSALHLEVR                 | R | E | 95.00% | 39  |                                              | 519.3112  | 2 | 3.5  | 91   | 99   | No |
|     |                                       |        |                                                                                                                                                                 | SPDEVTLTSIVPTR            | R | D | 95.00% | 114 |                                              | 757.9119  | 2 | 6.0  | 319  | 332  | No |
| 452 | IPI00329745; IPI00477140; IPI00783271 | LRPPRC | CDNA FLJ43793 FIS, CLONE TEST14000014, HIGHLY SIMILAR TO 130 KDALEUCINE-RICH PROTEIN.; HYPOTHETICAL PROTEIN LRPPRC.; LEUCINE-RICH PPR MOTIF-CONTAINING PROTEIN. | AGYPOYVSEILEK             | K | V | 95.00% | 51  |                                              | 748.8910  | 2 | 6.9  | 315  | 327  | No |
|     |                                       |        |                                                                                                                                                                 | DAGIEPGPDTYLALLNAYA EK    | R | G | 95.00% | 92  |                                              | 1111.0660 | 2 | 9.6  | 260  | 280  | No |
|     |                                       |        |                                                                                                                                                                 | DLPVTEAVFSALVTG HAR       | K | A | 95.00% | 113 |                                              | 942.0124  | 2 | 7.5  | 227  | 244  | No |
|     |                                       |        |                                                                                                                                                                 | DLPVTEAVFSALVTG HAR       | K | A | 95.00% | 30  |                                              | 628.3423  | 3 | 4.5  | 227  | 244  | No |
|     |                                       |        |                                                                                                                                                                 | EQNIVFNAETYSNLIK          | K | L | 95.00% | 93  |                                              | 941.9888  | 2 | 7.8  | 1060 | 1075 | No |
|     |                                       |        |                                                                                                                                                                 | GAYDIFLNAK                | K | E | 95.00% | 68  |                                              | 556.2955  | 2 | 3.7  | 1050 | 1059 | No |
|     |                                       |        |                                                                                                                                                                 | GDVENIEVVQK               | K | M | 95.00% | 48  |                                              | 615.3249  | 2 | 3.3  | 1153 | 1163 | No |

|     |                          |              |                                                                                                                              |                        |   |   |        |     |                |           |   |      |      |      |    |
|-----|--------------------------|--------------|------------------------------------------------------------------------------------------------------------------------------|------------------------|---|---|--------|-----|----------------|-----------|---|------|------|------|----|
|     |                          |              |                                                                                                                              | GFTLNDAAANSR           | K | L | 95.00% | 56  |                | 583.2853  | 2 | 2.2  | 1099 | 1109 | No |
|     |                          |              |                                                                                                                              | IQEENVIPR              | K | E | 95.00% | 47  |                | 549.3032  | 2 | 2.6  | 981  | 989  | No |
|     |                          |              |                                                                                                                              | KGAYDIFLNAK            | K | E | 95.00% | 63  |                | 620.3458  | 2 | 7.9  | 1049 | 1059 | No |
|     |                          |              |                                                                                                                              | LGAVYDVSHYNALLK        | K | V | 95.00% | 45  |                | 831.9483  | 2 | 2.0  | 156  | 170  | No |
|     |                          |              |                                                                                                                              | LLAEILR                | R | E | 95.00% | 54  |                | 414.2733  | 2 | 3.9  | 995  | 1001 | No |
|     |                          |              |                                                                                                                              | LQDAINILK              | K | E | 95.00% | 43  |                | 514.3143  | 2 | 5.1  | 764  | 772  | No |
|     |                          |              |                                                                                                                              | MEEANIQPNR             | K | V | 95.00% | 42  | M1: Oxidation  | 609.2871  | 2 | 6.5  | 188  | 197  | No |
|     |                          |              |                                                                                                                              | MVFINNIALAQIK          | K | N | 95.00% | 48  | M1: Oxidation  | 745.9299  | 2 | 7.7  | 1177 | 1189 | No |
|     |                          |              |                                                                                                                              | NLLESYHVPELIK          | R | D | 95.00% | 71  |                | 777.9365  | 2 | 7.6  | 628  | 640  | No |
|     |                          |              |                                                                                                                              | NNNIDAAIENIENMLTSENK   | K | V | 95.00% | 143 | M14: Oxidation | 1132.0360 | 2 | 5.3  | 1190 | 1209 | No |
|     |                          |              |                                                                                                                              | NNNIDAAIENIENMLTSENK   | K | V | 95.00% | 54  | M14: Oxidation | 755.0256  | 3 | 4.3  | 1190 | 1209 | No |
|     |                          |              |                                                                                                                              | NVQGIIEILK             | K | G | 95.00% | 52  |                | 563.8483  | 2 | 4.4  | 454  | 463  | No |
|     |                          |              |                                                                                                                              | SEAANGNLDFVLSFLK       | R | S | 95.00% | 132 |                | 862.9513  | 2 | 5.1  | 514  | 529  | No |
|     |                          |              |                                                                                                                              | SGGLGGSHALLLR          | R | S | 95.00% | 44  |                | 675.8988  | 2 | 2.8  | 115  | 128  | No |
|     |                          |              |                                                                                                                              | SGGLGGSHALLLR          | R | S | 95.00% | 49  |                | 450.9357  | 3 | 4.0  | 115  | 128  | No |
|     |                          |              |                                                                                                                              | SNTLPISLQSIK           | K | S | 95.00% | 72  |                | 664.8832  | 2 | 3.5  | 530  | 541  | No |
|     |                          |              |                                                                                                                              | SSLLLGFR               | R | R | 95.00% | 54  |                | 446.7683  | 2 | 3.5  | 542  | 549  | No |
|     |                          |              |                                                                                                                              | SVLELIPELNEKEEAYNSLMK  | K | S | 95.00% | 32  | M20: Oxidation | 822.4283  | 3 | 8.4  | 1306 | 1326 | No |
|     |                          |              |                                                                                                                              | TKDLPVTEAVFSALVTGHAR   | K | A | 95.00% | 84  |                | 704.7255  | 3 | 7.4  | 225  | 244  | No |
|     |                          |              |                                                                                                                              | TKDLPVTEAVFSALVTGHAR   | K | A | 95.00% | 68  |                | 528.7956  | 4 | 6.5  | 225  | 244  | No |
|     |                          |              |                                                                                                                              | TVLDQQQTPSR            | K | L | 95.00% | 50  |                | 636.8351  | 2 | 5.8  | 1137 | 1147 | No |
|     |                          |              |                                                                                                                              | TVQLTSSELESTLETLK      | K | A | 95.00% | 51  |                | 940.0078  | 2 | 8.7  | 656  | 672  | No |
|     |                          |              |                                                                                                                              | TVQLTSSELESTLETLK      | K | A | 95.00% | 53  |                | 627.0045  | 3 | 3.3  | 656  | 672  | No |
|     |                          |              |                                                                                                                              | VIEEQLEPAVEK           | K | I | 95.00% | 66  |                | 692.3757  | 2 | 4.5  | 1225 | 1236 | No |
|     |                          |              |                                                                                                                              | VIEPQYFGLAYLFR         | K | K | 95.00% | 76  |                | 858.4699  | 2 | 9.1  | 1210 | 1223 | No |
|     |                          |              |                                                                                                                              | VIEPQYFGLAYLFR         | K | K | 95.00% | 45  |                | 572.6487  | 3 | 8.3  | 1210 | 1223 | No |
| 453 | IPI00329801              | ANXA5        | ANNEXIN A5.                                                                                                                  | YAGEPVPIEPPSEFEFYAQLR  | K | K | 95.00% | 42  |                | 905.4514  | 3 | 9.0  | 1365 | 1387 | No |
|     |                          |              |                                                                                                                              | DLDDDLKSELTK           | R | F | 95.00% | 36  |                | 482.9314  | 3 | 6.2  | 64   | 76   | No |
|     |                          |              |                                                                                                                              | DLDDDLKSELTKGKFEK      | R | L | 95.00% | 52  |                | 617.6690  | 3 | 8.4  | 64   | 79   | No |
|     |                          |              |                                                                                                                              | ETSGNLEQLLLAVVK        | R | S | 95.00% | 52  |                | 538.6475  | 3 | 9.6  | 228  | 242  | No |
|     |                          |              |                                                                                                                              | FITIFGTR               | K | S | 95.00% | 36  |                | 477.7776  | 2 | 6.5  | 194  | 201  | No |
|     |                          |              |                                                                                                                              | GAGTDDHTLIR            | K | V | 95.00% | 66  |                | 578.2963  | 2 | 7.4  | 261  | 271  | No |
|     |                          |              |                                                                                                                              | GLGTDEESILTLTISR       | K | S | 95.00% | 61  |                | 568.9758  | 3 | 5.4  | 30   | 45   | No |
|     |                          |              |                                                                                                                              | GTVDFPGFDER            | R | A | 95.00% | 35  |                | 670.8135  | 2 | 5.0  | 7    | 18   | No |
|     |                          |              |                                                                                                                              | LIVALMKPSR             | K | L | 95.00% | 35  | M6: Oxidation  | 572.3513  | 2 | 2.0  | 80   | 89   | No |
|     |                          |              |                                                                                                                              | LYDAYELK               | R | H | 95.00% | 49  |                | 507.7632  | 2 | 3.8  | 90   | 97   | No |
|     |                          |              |                                                                                                                              | MLVVLLQANR             | R | D | 95.00% | 65  | M1: Oxidation  | 586.8461  | 2 | 1.6  | 152  | 161  | No |
|     |                          |              |                                                                                                                              | NFATSLYSMIK            | K | G | 95.00% | 60  | M9: Oxidation  | 645.8293  | 2 | 8.0  | 291  | 301  | No |
|     |                          |              |                                                                                                                              | SEIDLFNIR              | R | K | 95.00% | 49  |                | 553.8016  | 2 | 9.7  | 277  | 285  | No |
|     |                          |              |                                                                                                                              | SEIDLFNIRK             | R | E | 95.00% | 36  |                | 617.8477  | 2 | 6.4  | 277  | 286  | No |
|     |                          |              |                                                                                                                              | SIPAYLAETLYYAMK        | R | G | 95.00% | 65  | M14: Oxidation | 875.4414  | 2 | -1.3 | 246  | 260  | No |
|     |                          |              |                                                                                                                              | VLTEIIASR              | K | T | 95.00% | 68  |                | 501.3066  | 2 | 5.9  | 109  | 117  | No |
|     |                          |              |                                                                                                                              | WGTDEEKFITIFGTR        | K | S | 95.00% | 44  |                | 600.6414  | 3 | 6.4  | 187  | 201  | No |
|     |                          |              | PRE-B-CELL LEUKEMIA HOMEBOX<br>INTERACTING PROTEIN 1.; PRE-B-CELL<br>LEUKEMIA TRANSCRIPTION FACTOR<br>INTERACTING PROTEIN 1. |                        |   |   |        |     |                |           |   |      |      |      |    |
| 454 | IPI00332106; IPI00645060 | PBXIP1       |                                                                                                                              | ALESELQQLR             | R | A | 95.00% | 72  |                | 593.8281  | 2 | 4.2  | 326  | 335  | No |
|     |                          |              |                                                                                                                              | ELPLSPAFFGEDGIFR       | K | H | 95.00% | 110 |                | 897.9645  | 2 | 8.0  | 635  | 650  | No |
|     |                          |              |                                                                                                                              | EQLEAEAAQALR           | K | Q | 95.00% | 47  |                | 629.3311  | 2 | 8.3  | 385  | 395  | No |
|     |                          |              |                                                                                                                              | GALQQGEAFQR            | R | A | 95.00% | 79  |                | 602.8095  | 2 | 3.0  | 315  | 325  | No |
|     |                          |              |                                                                                                                              | GLEEENAQLR             | K | G | 95.00% | 51  |                | 579.7939  | 2 | 3.7  | 305  | 314  | No |
|     |                          |              |                                                                                                                              | LLGSVQQDLER            | R | S | 95.00% | 79  |                | 629.3457  | 2 | 2.5  | 404  | 414  | No |
|     |                          |              |                                                                                                                              | LLQAQLQAQKEELQSLMHQPK  | R | G | 95.00% | 31  | M17: Oxidation | 826.4512  | 3 | 7.8  | 284  | 304  | No |
|     |                          |              |                                                                                                                              | LPWAGQLTK              | R | E | 95.00% | 26  |                | 507.2949  | 2 | 3.5  | 626  | 634  | No |
|     |                          |              |                                                                                                                              | QEGLTFFGTTELAPVR       | R | Q | 95.00% | 80  |                | 832.9428  | 2 | 7.6  | 597  | 611  | No |
|     |                          |              |                                                                                                                              | QKEQLEAEAAQALR         | K | Q | 95.00% | 66  |                | 757.4080  | 2 | 6.9  | 383  | 395  | No |
|     |                          |              |                                                                                                                              | QVLPDPEVLEAVGDR        | R | Q | 95.00% | 72  |                | 818.9389  | 2 | 9.2  | 231  | 245  | No |
|     |                          |              | ISOFORM 1 OF ACYL-COENZYME A<br>THIOESTERASE 2.; ACYL-COENZYME A<br>THIOESTERASE 1.                                          |                        |   |   |        |     |                |           |   |      |      |      |    |
| 455 | IPI00220906; IPI00333838 | ACOT1; ACOT2 |                                                                                                                              | AATLILEPAGR            | M | C | 95.00% | 45  |                | 556.3290  | 2 | 2.3  | 2    | 12   | No |
|     |                          |              |                                                                                                                              | ADTLGELDLR             | R | A | 95.00% | 67  |                | 616.3147  | 2 | 3.5  | 54   | 64   | No |
|     |                          |              |                                                                                                                              | AESTFLFLVGQDDHNWK      | R | S | 95.00% | 49  |                | 669.6641  | 3 | 7.5  | 314  | 330  | No |
|     |                          |              |                                                                                                                              | APALGGSFAGLEPMGLLWALEP |   |   |        |     |                |           |   |      |      |      |    |
|     |                          |              |                                                                                                                              | EKPLVLR                | R | L | 95.00% | 66  |                | 973.8738  | 3 | 8.7  | 65   | 92   | No |
|     |                          |              |                                                                                                                              | ASLHALVGSPIIWGGEP      | R | A | 95.00% | 65  |                | 930.5184  | 2 | 8.4  | 372  | 389  | No |
|     |                          |              |                                                                                                                              | ASLHALVGSPIIWGGEP      | R | A | 95.00% | 59  |                | 620.6802  | 3 | 6.2  | 372  | 389  | No |
|     |                          |              |                                                                                                                              | DGYADIVDLNSPLEGPDQK    | K | S | 95.00% | 61  |                | 715.6898  | 3 | 8.4  | 287  | 306  | No |
|     |                          |              |                                                                                                                              | GFAYMALAYNYEDLPK       | K | T | 95.00% | 35  | M5: Oxidation  | 990.9840  | 2 | 9.3  | 182  | 198  | No |

|     |                          |          |                                                   |                         |   |   |        |     |                                             |           |   |      |     |     |     |
|-----|--------------------------|----------|---------------------------------------------------|-------------------------|---|---|--------|-----|---------------------------------------------|-----------|---|------|-----|-----|-----|
|     |                          |          |                                                   | GLAPEQPVTLR             | R | A | 95.00% | 44  |                                             | 590.8404  | 2 | 3.2  | 25  | 35  | No  |
|     |                          |          |                                                   | GPGVGLLGISK             | K | G | 95.00% | 71  |                                             | 499.3077  | 2 | 2.8  | 223 | 233 | No  |
|     |                          |          |                                                   | TPLAVELEVLDGHDPDPGR     | R | L | 95.00% | 115 |                                             | 1015.5210 | 2 | 7.2  | 100 | 118 | No  |
|     |                          |          |                                                   | TPLAVELEVLDGHDPDPGR     | R | L | 95.00% | 61  |                                             | 677.3484  | 3 | 4.8  | 100 | 118 | No  |
|     |                          |          |                                                   | YFLPPGVR                | R | R | 95.00% | 29  |                                             | 474.7708  | 2 | 3.1  | 128 | 135 | No  |
|     |                          |          |                                                   | YKGETLPPVGVNR           | R | N | 95.00% | 46  |                                             | 715.3968  | 2 | 3.7  | 267 | 279 | No  |
|     |                          |          |                                                   | YRADTLGELDLER           | R | A | 95.00% | 82  |                                             | 775.8987  | 2 | 5.1  | 52  | 64  | No  |
|     |                          |          |                                                   | YRADTLGELDLER           | R | A | 95.00% | 51  |                                             | 517.6009  | 3 | 3.5  | 52  | 64  | No  |
| 456 | IPI00334775; IPI00414676 | HSP90AB1 | 85 KDA PROTEIN.; HEAT SHOCK PROTEIN HSP 90-BETA.  | ADLINNLGTIAK            | K | S | 95.00% | 30  |                                             | 1242.7100 | 1 | 2.8  | 96  | 107 | Yes |
|     |                          |          |                                                   | ADLINNLGTIAK            | K | S | 95.00% | 64  |                                             | 621.8598  | 2 | 4.6  | 96  | 107 | Yes |
|     |                          |          |                                                   | ALLFIPR                 | R | R | 95.00% | 48  |                                             | 415.2706  | 2 | 3.9  | 331 | 337 | No  |
|     |                          |          |                                                   |                         |   |   |        |     | M5: Oxidation, M8: Oxidation, M9: Oxidation |           |   |      |     |     |     |
|     |                          |          |                                                   | DNSTMGYMMAK             | R | K | 95.00% | 55  |                                             | 648.7559  | 2 | 10.0 | 613 | 623 | No  |
|     |                          |          |                                                   | EDQTEYLEER              | K | R | 95.00% | 52  |                                             | 656.2938  | 2 | 7.0  | 187 | 196 | Yes |
|     |                          |          |                                                   | EGLELPEDEEEK            | K | K | 95.00% | 48  |                                             | 708.8251  | 2 | 2.8  | 539 | 550 | Yes |
|     |                          |          |                                                   | EGLELPEDEEEKKK          | K | M | 95.00% | 58  |                                             | 836.9250  | 2 | 8.2  | 539 | 552 | No  |
|     |                          |          |                                                   | EKYIDQEELEK             | K | T | 95.00% | 42  |                                             | 704.8553  | 2 | 4.7  | 274 | 284 | Yes |
|     |                          |          |                                                   | ELISNASDALDK            | R | I | 95.00% | 57  |                                             | 638.3295  | 2 | 6.1  | 42  | 53  | Yes |
|     |                          |          |                                                   | ELISNASDALDKIR          | R | Y | 95.00% | 83  |                                             | 772.9214  | 2 | 4.1  | 42  | 55  | No  |
|     |                          |          |                                                   | EQVANSFAVER             | K | V | 95.00% | 63  |                                             | 625.3141  | 2 | 2.3  | 492 | 502 | No  |
|     |                          |          |                                                   | GVVDSEDLPLNISR          | R | E | 95.00% | 96  |                                             | 757.4001  | 2 | 4.0  | 379 | 392 | Yes |
|     |                          |          |                                                   | GVVDSEDLPLNISR          | R | E | 95.00% | 51  |                                             | 505.2707  | 3 | 6.7  | 379 | 392 | Yes |
|     |                          |          |                                                   | HFSVEGQLEFR             | K | A | 95.00% | 73  |                                             | 674.8394  | 2 | 4.4  | 320 | 330 | Yes |
|     |                          |          |                                                   | HFSVEGQLEFR             | K | A | 95.00% | 50  |                                             | 450.2282  | 3 | 3.0  | 320 | 330 | Yes |
|     |                          |          |                                                   | HLEINPDHPIVETLR         | K | Q | 95.00% | 85  |                                             | 891.9824  | 2 | 3.6  | 625 | 639 | No  |
|     |                          |          |                                                   | HLEINPDHPIVETLR         | K | Q | 95.00% | 57  |                                             | 594.9901  | 3 | 2.3  | 625 | 639 | No  |
|     |                          |          |                                                   | HNDDEQYAWESSAGGSFTVR    | K | A | 95.00% | 61  |                                             | 752.6616  | 3 | 4.3  | 149 | 168 | No  |
|     |                          |          |                                                   | HSQFIGYPITLYLEK         | K | E | 95.00% | 91  |                                             | 904.9895  | 2 | 6.8  | 205 | 219 | No  |
|     |                          |          |                                                   | HSQFIGYPITLYLEK         | K | E | 95.00% | 52  |                                             | 603.6628  | 3 | 7.6  | 205 | 219 | No  |
|     |                          |          |                                                   | IDIIPNPQER              | K | T | 95.00% | 55  |                                             | 597.8301  | 2 | 3.2  | 73  | 82  | No  |
|     |                          |          |                                                   | IRYESLTDPSKLDMSGK       | K | E | 95.00% | 52  |                                             | 603.6533  | 3 | 2.4  | 54  | 69  | Yes |
|     |                          |          |                                                   | KHLEINPDHPIVETLR        | K | Q | 95.00% | 32  |                                             | 637.6894  | 3 | 3.7  | 624 | 639 | No  |
|     |                          |          |                                                   | KHLEINPDHPIVETLR        | K | Q | 95.00% | 48  |                                             | 478.5202  | 4 | 6.2  | 624 | 639 | No  |
|     |                          |          |                                                   | LGLGIDEDEVAAEEPNAAVPDEI |   |   |        |     |                                             |           |   |      |     |     |     |
|     |                          |          |                                                   | PPLGDEEDASR             | K | M | 95.00% | 79  |                                             | 1178.2310 | 3 | 8.6  | 686 | 719 | No  |
|     |                          |          |                                                   | NPDDITQEEYGEFYK         | R | S | 95.00% | 93  |                                             | 924.4045  | 2 | 1.9  | 292 | 306 | No  |
|     |                          |          |                                                   | RAPFDLFENK              | R | K | 95.00% | 46  |                                             | 618.8262  | 2 | 5.4  | 338 | 347 | No  |
|     |                          |          |                                                   | RAPFDLFENK              | R | K | 95.00% | 34  |                                             | 412.8866  | 3 | 5.0  | 338 | 347 | No  |
|     |                          |          |                                                   | RAPFDLFENKK             | R | K | 95.00% | 53  |                                             | 455.5837  | 3 | 2.1  | 338 | 348 | No  |
|     |                          |          |                                                   | SIYYITGESK              | K | E | 95.00% | 36  |                                             | 1160.5950 | 1 | 9.6  | 482 | 491 | No  |
|     |                          |          |                                                   | SIYYITGESK              | K | E | 95.00% | 45  |                                             | 580.7983  | 2 | 4.2  | 482 | 491 | No  |
|     |                          |          |                                                   | SLTNDWEDHLAVK           | K | H | 95.00% | 88  |                                             | 764.3835  | 2 | 9.7  | 307 | 319 | Yes |
|     |                          |          |                                                   | TLTLVDTGIGMTK           | R | A | 95.00% | 102 |                                             | 683.3706  | 2 | 2.2  | 83  | 95  | No  |
|     |                          |          |                                                   | TLTLVDTGIGMTK           | R | A | 95.00% | 69  |                                             | 675.3736  | 2 | 2.9  | 83  | 95  | No  |
|     |                          |          |                                                   | VILHLKEDQTEYLEER        | K | R | 95.00% | 92  |                                             | 1008.0330 | 2 | 6.8  | 181 | 196 | Yes |
|     |                          |          |                                                   | VILHLKEDQTEYLEER        | K | R | 95.00% | 79  |                                             | 672.3587  | 3 | 7.6  | 181 | 196 | Yes |
|     |                          |          |                                                   | YESLTDPSK               | R | L | 95.00% | 32  |                                             | 1039.4990 | 1 | 4.2  | 56  | 64  | Yes |
|     |                          |          |                                                   | YESLTDPSK               | R | L | 95.00% | 35  |                                             | 520.2534  | 2 | 4.0  | 56  | 64  | Yes |
|     |                          |          |                                                   | YESLTDPSKLDMSGK         | R | E | 95.00% | 86  |                                             | 770.3819  | 2 | 1.0  | 56  | 69  | Yes |
|     |                          |          |                                                   | YHTSQSGDEMTSLSEYYSR     | R | M | 95.00% | 116 |                                             | 1096.9800 | 2 | 5.5  | 457 | 475 | No  |
|     |                          |          |                                                   | YHTSQSGDEMTSLSEYYSR     | R | M | 95.00% | 62  |                                             | 731.6540  | 3 | 2.8  | 457 | 475 | No  |
|     |                          |          |                                                   | YIDQEELNK               | K | T | 95.00% | 72  |                                             | 576.2863  | 2 | 5.2  | 276 | 284 | Yes |
| 457 | IPI00337541              | NNT      | NAD(P) TRANSHYDROGENASE, MITOCHONDRIAL PRECURSOR. | APMVNPTLGVHEADLLK       | R | T | 95.00% | 55  | M3: Oxidation                               | 910.9915  | 2 | 9.3  | 130 | 146 | No  |
|     |                          |          |                                                   | APMVNPTLGVHEADLLK       | R | T | 95.00% | 47  | M3: Oxidation                               | 607.6618  | 3 | 6.4  | 130 | 146 | No  |
|     |                          |          |                                                   | AQYPIADLVK              | K | M | 95.00% | 30  |                                             | 559.3190  | 2 | 3.7  | 940 | 949 | No  |
|     |                          |          |                                                   | EVLASDLVVK              | K | V | 95.00% | 29  |                                             | 536.8206  | 2 | 7.2  | 118 | 127 | No  |
|     |                          |          |                                                   | GITHIGYTDLPSR           | K | M | 95.00% | 58  |                                             | 715.3829  | 2 | 9.6  | 367 | 379 | No  |
|     |                          |          |                                                   | GITHIGYTDLPSR           | K | M | 95.00% | 48  |                                             | 477.2559  | 3 | 5.5  | 367 | 379 | No  |
|     |                          |          |                                                   | ILVGGGVAGLASAGAAK       | K | S | 95.00% | 141 |                                             | 762.9662  | 2 | 8.6  | 230 | 247 | No  |
|     |                          |          |                                                   | MATQASTLYSNNITK         | R | L | 95.00% | 120 | M1: Oxidation                               | 829.9106  | 2 | 4.6  | 380 | 394 | No  |
|     |                          |          |                                                   | QGFNVVVEVGAGEASK        | K | F | 95.00% | 77  |                                             | 789.8966  | 2 | 5.7  | 85  | 100 | No  |
|     |                          |          |                                                   | SLGAEPLEVDLK            | K | E | 95.00% | 57  |                                             | 635.8511  | 2 | 3.7  | 268 | 279 | No  |
|     |                          |          |                                                   | TTVLAMDQVPR             | K | V | 95.00% | 53  | M6: Oxidation                               | 623.8310  | 2 | 6.1  | 172 | 182 | No  |
|     |                          |          |                                                   | VALSPAGVQNLVK           | R | Q | 95.00% | 81  |                                             | 648.3913  | 2 | 4.6  | 72  | 84  | No  |
|     |                          |          |                                                   | VRAPMVNPTLGVHEADLLK     | K | T | 95.00% | 39  | M5: Oxidation                               | 692.7203  | 3 | 8.5  | 128 | 146 | No  |
|     |                          |          |                                                   | VRAPMVNPTLGVHEADLLK     | K | T | 95.00% | 30  | M5: Oxidation                               | 519.7905  | 4 | 5.2  | 128 | 146 | No  |
|     |                          |          |                                                   | VTAQQYDALSSMANIAGYK     | R | A | 95.00% | 30  | M13: Oxidation                              | 697.0211  | 3 | 9.7  | 183 | 202 | No  |

|                        |                          |       |                                                                     |                                                                                                                          |              |   |        |        |           |          |     |      |      |     |    |
|------------------------|--------------------------|-------|---------------------------------------------------------------------|--------------------------------------------------------------------------------------------------------------------------|--------------|---|--------|--------|-----------|----------|-----|------|------|-----|----|
| 458                    | IPI00337741              | APEH  | ACYLAMINO-ACID-RELEASING ENZYME.                                    | ALDVSASDDEIAR                                                                                                            | K            | L | 95.00% | 81     | 681.3326  | 2        | 1.9 | 181  | 193  | No  |    |
|                        |                          |       |                                                                     | GSTGFGQDSILSLPGNVGHQDV                                                                                                   | R            | D | 95.00% | 39     | 771.7258  | 3        | 6.0 | 539  | 561  | No  |    |
|                        |                          |       |                                                                     | K                                                                                                                        | K            | N | 95.00% | 30     | 539.7866  | 2        | 7.2 | 119  | 126  | No  |    |
|                        |                          |       |                                                                     | QFLEVWEK                                                                                                                 | R            | G | 95.00% | 83     | 844.9520  | 2        | 6.0 | 4    | 18   | No  |    |
|                        |                          |       |                                                                     | QVLLSEPEEAAALYR                                                                                                          | R            | G | 95.00% | 83     | 844.9520  | 2        | 6.0 | 4    | 18   | No  |    |
|                        |                          |       |                                                                     | QYLVFHDGDSVVFAGPAGNSVE                                                                                                   | R            | G | 95.00% | 67     | 855.7540  | 3        | 3.5 | 66   | 89   | No  |    |
|                        |                          |       |                                                                     | TR                                                                                                                       | R            | C | 95.00% | 57     | 649.8558  | 2        | 3.2 | 280  | 291  | No  |    |
|                        |                          |       |                                                                     | SALYYVDLIGGK                                                                                                             | K            | H | 95.00% | 33     | 504.7745  | 2        | 4.7 | 132  | 140  | No  |    |
|                        |                          |       |                                                                     | SFNLSALEK                                                                                                                | K            | R | 95.00% | 73     | 701.3783  | 2        | 5.2 | 665  | 676  | No  |    |
|                        |                          |       |                                                                     | TPLLMLGQEDR                                                                                                              | K            | Q | 95.00% | 77     | 585.3512  | 2        | 4.4 | 340  | 350  | No  |    |
| VTSVVVDVVR             | K                        | Q     | 95.00%                                                              | 77                                                                                                                       | 585.3512     | 2 | 4.4    | 340    | 350       | No       |     |      |      |     |    |
| 459                    | IPI00374208              | CAND2 | CULLIN-ASSOCIATED NEDD8-DISSOCIATED PROTEIN 2.                      | AVAALLTIPEVGK                                                                                                            | R            | S | 95.00% | 66     | 641.3982  | 2        | 7.9 | 1067 | 1079 | No  |    |
|                        |                          |       |                                                                     | AVLLEALGSPSEDVR                                                                                                          | K            | A | 95.00% | 91     | 778.4274  | 2        | 8.8 | 771  | 785  | No  |    |
|                        |                          |       |                                                                     | AVLLEALGSPSEDVR                                                                                                          | K            | A | 95.00% | 33     | 519.2858  | 3        | 5.6 | 771  | 785  | No  |    |
|                        |                          |       |                                                                     | DLLDDILPLLYQETK                                                                                                          | R            | I | 95.00% | 91     | 894.9933  | 2        | 8.3 | 931  | 945  | No  |    |
|                        |                          |       |                                                                     | DLLDDILPLLYQETK                                                                                                          | R            | I | 95.00% | 57     | 596.9980  | 3        | 8.1 | 931  | 945  | No  |    |
|                        |                          |       |                                                                     | DSIQLDEDSER                                                                                                              | K            | K | 95.00% | 44     | 653.7954  | 2        | 5.0 | 37   | 47   | No  |    |
|                        |                          |       |                                                                     | FMATSDLMSELQK                                                                                                            | R            | D | 95.00% | 72     | 766.8569  | 2        | 5.4 | 24   | 36   | No  |    |
|                        |                          |       |                                                                     | LGDDLEPTLLLLLDR                                                                                                          | R            | L | 95.00% | 81     | 848.4857  | 2        | 5.8 | 513  | 527  | No  |    |
|                        |                          |       |                                                                     | LGDDLEPTLLLLLDR                                                                                                          | R            | L | 95.00% | 40     | 565.9929  | 3        | 5.3 | 513  | 527  | No  |    |
|                        |                          |       |                                                                     | LISLLTAPVYEQAVDGGPGLHK                                                                                                   | K            | Q | 95.00% | 46     | 760.0942  | 3        | 9.6 | 684  | 705  | No  |    |
|                        |                          |       |                                                                     | LVLVNPFFLLPR                                                                                                             | K            | L | 95.00% | 61     | 684.4312  | 2        | 9.5 | 870  | 881  | No  |    |
|                        |                          |       |                                                                     | MLDPEPYVGEMSAVTLAR                                                                                                       | R            | L | 95.00% | 108    | 1005.9890 | 2        | 9.2 | 467  | 484  | No  |    |
|                        |                          |       |                                                                     | RQYLLHSLR                                                                                                                | R            | E | 95.00% | 61     | 433.5992  | 3        | 9.5 | 817  | 826  | No  |    |
|                        |                          |       |                                                                     | SNPELAALFESIQK                                                                                                           | R            | D | 95.00% | 84     | 773.9142  | 2        | 5.8 | 1092 | 1105 | No  |    |
|                        |                          |       |                                                                     | SNPELAALFESIQK                                                                                                           | R            | D | 95.00% | 65     | 516.2777  | 3        | 3.7 | 1092 | 1105 | No  |    |
|                        |                          |       |                                                                     | SPIMADFSSQIR                                                                                                             | K            | S | 95.00% | 62     | 684.3406  | 2        | 7.7 | 1080 | 1091 | No  |    |
| VGAGSLPDFLPFLLEQIEAEPR | R                        | R     | 95.00%                                                              | 68                                                                                                                       | 800.1004     | 3 | 8.2    | 795    | 816       | No       |     |      |      |     |    |
| 460                    | IPI00374657              | VAPA  | VESICLE-ASSOCIATED MEMBRANE PROTEIN-ASSOCIATED PROTEIN A ISOFORM 1. | FKGPFDTVVTTNLK                                                                                                           | K            | L | 95.00% | 35     | 522.9612  | 3        | 9.4 | 25   | 38   | No  |    |
|                        |                          |       |                                                                     | GPFTDVTTLNLK                                                                                                             | K            | L | 95.00% | 83     | 646.3526  | 2        | 5.7 | 27   | 38   | No  |    |
|                        |                          |       |                                                                     | HEQILVLDPPDLK                                                                                                            | K            | F | 95.00% | 34     | 539.9692  | 3        | 3.8 | 11   | 24   | No  |    |
|                        |                          |       |                                                                     | KVAHSDKPGSTSTASFR                                                                                                        | R            | D | 95.00% | 63     | 592.6436  | 3        | 6.4 | 250  | 266  | No  |    |
|                        |                          |       |                                                                     | KVAHSDKPGSTSTASFR                                                                                                        | R            | D | 95.00% | 32     | 444.7342  | 4        | 5.4 | 250  | 266  | No  |    |
|                        |                          |       |                                                                     | VAHSDKPGSTSTASFR                                                                                                         | K            | D | 95.00% | 51     | 824.4147  | 2        | 7.6 | 251  | 266  | No  |    |
|                        |                          |       |                                                                     | VAHSDKPGSTSTASFR                                                                                                         | K            | D | 95.00% | 39     | 549.9449  | 3        | 6.1 | 251  | 266  | No  |    |
|                        |                          |       |                                                                     | ISOFORM 2 OF EUKARYOTIC TRANSLATION INITIATION FACTOR 5A-1.; ISOFORM 1 OF EUKARYOTIC TRANSLATION INITIATION FACTOR 5A-1. | EDLRLPEGDLGK | R | E      | 95.00% | 34        | 671.3586 | 2   | 5.6  | 140  | 151 | No |
|                        |                          |       |                                                                     | NDFQLGIQDGYLSLLQDSGEVR                                                                                                   | R            | E | 95.00% | 124    | 1290.6620 | 2        | 8.0 | 117  | 139  | No  |    |
|                        |                          |       |                                                                     | RNDFQLGIQDGYLSLLQDSGEV                                                                                                   | R            | E | 95.00% | 124    | 1290.6620 | 2        | 8.0 | 117  | 139  | No  |    |
| R                      | K                        | E     | 95.00%                                                              | 80                                                                                                                       | 912.8117     | 3 | 8.7    | 86     | 109       | No       |     |      |      |     |    |
| VHLVGIDIFTGK           | K                        | K     | 95.00%                                                              | 71                                                                                                                       | 649.8835     | 2 | 9.1    | 86     | 97        | No       |     |      |      |     |    |
| VHLVGIDIFTGK           | K                        | K     | 95.00%                                                              | 48                                                                                                                       | 433.5919     | 3 | 9.7    | 86     | 97        | No       |     |      |      |     |    |
| AINEGPPTESGKQEK        | K                        | A     | 95.00%                                                              | 68                                                                                                                       | 792.9048     | 2 | 9.3    | 59     | 73        | No       |     |      |      |     |    |
| ATVEEEDAKTASQEETGQR    | K                        | K     | 95.00%                                                              | 46                                                                                                                       | 693.6567     | 3 | 3.2    | 182    | 200       | No       |     |      |      |     |    |
| AVVEEAKAEPK            | K                        | E     | 95.00%                                                              | 42                                                                                                                       | 643.3409     | 2 | 7.7    | 223    | 234       | No       |     |      |      |     |    |
| FFPDADFYAELDPAK        | K                        | R     | 95.00%                                                              | 90                                                                                                                       | 873.4147     | 2 | 8.7    | 438    | 452       | No       |     |      |      |     |    |
| FGGAASGPTALFR          | K                        | N     | 95.00%                                                              | 85                                                                                                                       | 626.3317     | 2 | 5.5    | 374    | 386       | No       |     |      |      |     |    |
| HNFTLAFSTAEK           | R                        | L     | 95.00%                                                              | 68                                                                                                                       | 683.3479     | 2 | 5.6    | 455    | 466       | No       |     |      |      |     |    |
| KEDGEKEETTIVGSQEMTGR   | K                        | K     | 95.00%                                                              | 33                                                                                                                       | 532.4976     | 4 | 7.2    | 114    | 132       | No       |     |      |      |     |    |
| LSEDGTTVSPAADNPMSGGGA  | K                        | G     | 95.00%                                                              | 58                                                                                                                       | 912.0737     | 3 | 2.0    | 26     | 53        | No       |     |      |      |     |    |
| PAAETK                 | K                        | G     | 95.00%                                                              | 58                                                                                                                       | 912.0737     | 3 | 2.0    | 26     | 53        | No       |     |      |      |     |    |
| LSEDGTTVSPAADNPMSGGGA  | K                        | G     | 95.00%                                                              | 58                                                                                                                       | 912.0737     | 3 | 2.0    | 26     | 53        | No       |     |      |      |     |    |
| PAAETKGTAGK            | K                        | A     | 95.00%                                                              | 71                                                                                                                       | 1050.1510    | 3 | 5.1    | 26     | 58        | No       |     |      |      |     |    |
| 463                    | IPI00377214; IPI00465264 | NLRX1 | NLR FAMILY MEMBER X1 ISOFORM 2.; NLR FAMILY MEMBER X1 ISOFORM 1.    | ALPLLFNLK                                                                                                                | R            | V | 95.00% | 26     | 571.3732  | 2        | 3.0 | 548  | 557  | No  |    |
|                        |                          |       |                                                                     | FSAEVLSSLR                                                                                                               | R            | Q | 95.00% | 80     | 554.8062  | 2        | 4.0 | 690  | 699  | No  |    |
|                        |                          |       |                                                                     | LFPSASATEAIQR                                                                                                            | R            | H | 95.00% | 69     | 695.8765  | 2        | 8.7 | 69   | 81   | No  |    |
|                        |                          |       |                                                                     | QFGPTFALDTVHVDPVIR                                                                                                       | R            | E | 95.00% | 44     | 671.3652  | 3        | 9.5 | 99   | 116  | No  |    |
|                        |                          |       |                                                                     | TLLPVFLR                                                                                                                 | R            | A | 95.00% | 27     | 479.8122  | 2        | 7.8 | 744  | 751  | No  |    |
|                        |                          |       |                                                                     | ADLNNLGTIAK                                                                                                              | K            | S | 95.00% | 30     | 1242.7100 | 1        | 2.8 | 153  | 164  | Yes |    |

|                      |   |   |        |     |           |   |     |     |     |     |
|----------------------|---|---|--------|-----|-----------|---|-----|-----|-----|-----|
| ADLNNLGTIAK          | K | S | 95.00% | 64  | 621.8598  | 2 | 4.6 | 223 | 234 | Yes |
| ALLFVPR              | R | R | 95.00% | 43  | 408.2624  | 2 | 3.2 | 391 | 397 | No  |
| APFDLFENR            | R | K | 95.00% | 46  | 554.7783  | 2 | 5.3 | 469 | 477 | No  |
| DQVANSFVER           | K | L | 95.00% | 67  | 618.3090  | 2 | 6.5 | 622 | 632 | No  |
| EDQTEYLEER           | K | R | 95.00% | 52  | 656.2938  | 2 | 7.0 | 314 | 323 | Yes |
| EGLELPEDEEEK         | K | K | 95.00% | 48  | 708.8251  | 2 | 2.8 | 669 | 680 | Yes |
| EGLELPEDEEEKK        | K | Q | 95.00% | 58  | 836.9250  | 2 | 8.2 | 669 | 682 | No  |
| EKYIDQEELNK          | K | T | 95.00% | 42  | 704.8553  | 2 | 4.7 | 404 | 414 | Yes |
| ELHINLIPNKQDR        | K | T | 95.00% | 44  | 795.4459  | 2 | 4.6 | 197 | 209 | No  |
| ELHINLIPNKQDR        | K | T | 95.00% | 31  | 530.6335  | 3 | 5.2 | 197 | 209 | No  |
| ELISNSSDALDK         | R | I | 95.00% | 60  | 646.3274  | 2 | 6.8 | 169 | 180 | No  |
| ELISNSSDALDKIR       | R | Y | 95.00% | 104 | 780.9207  | 2 | 6.6 | 169 | 182 | No  |
| GVVDSDELPLNISR       | R | E | 95.00% | 96  | 757.4001  | 2 | 4.0 | 509 | 522 | Yes |
| GVVDSDELPLNISR       | R | E | 95.00% | 51  | 505.2707  | 3 | 6.7 | 509 | 522 | Yes |
| HFSVEGQLEFR          | K | A | 95.00% | 73  | 674.8394  | 2 | 4.4 | 450 | 460 | Yes |
| HFSVEGQLEFR          | K | A | 95.00% | 50  | 450.2282  | 3 | 3.0 | 380 | 390 | Yes |
| HIYYITGETK           | K | D | 95.00% | 45  | 612.8213  | 2 | 6.8 | 612 | 621 | No  |
| HLEINPDHSIETLR       | K | Q | 95.00% | 101 | 893.9809  | 2 | 4.8 | 685 | 699 | No  |
| HLEINPDHSIETLR       | K | Q | 95.00% | 49  | 596.3235  | 3 | 5.3 | 755 | 769 | No  |
| HNDDEQYAWESSAGGSFTVR | K | T | 95.00% | 61  | 752.6616  | 3 | 4.3 | 206 | 225 | No  |
| HSQFIGYPITLFVEK      | K | E | 95.00% | 85  | 889.9849  | 2 | 7.8 | 332 | 346 | No  |
| HSQFIGYPITLFVEK      | K | E | 95.00% | 55  | 593.6586  | 3 | 6.7 | 332 | 346 | No  |
| IRYESLTDPSKLDGK      | K | E | 95.00% | 52  | 603.6533  | 3 | 2.4 | 111 | 126 | Yes |
| KHLEINPDHSIETLR      | K | Q | 95.00% | 44  | 639.0215  | 3 | 4.5 | 684 | 699 | No  |
| KHLEINPDHSIETLR      | K | Q | 95.00% | 41  | 479.5178  | 4 | 3.9 | 754 | 769 | No  |
| NPDDITNEEYGEFYK      | R | S | 95.00% | 106 | 917.4004  | 2 | 5.9 | 422 | 436 | No  |
| RAPFDLFENR           | R | K | 95.00% | 45  | 632.8298  | 2 | 6.3 | 468 | 477 | No  |
| SLTNDWEDHLAVK        | K | H | 95.00% | 88  | 764.3835  | 2 | 9.7 | 437 | 449 | Yes |
| TLTIVDTGIGMTK        | R | A | 95.00% | 102 | 683.3706  | 2 | 2.2 | 140 | 152 | No  |
| TLTIVDTGIGMTK        | R | A | 95.00% | 69  | 675.3736  | 2 | 2.9 | 140 | 152 | No  |
| VILHLKEDQTEYLEER     | K | R | 95.00% | 92  | 1008.0330 | 2 | 6.8 | 238 | 253 | Yes |
| VILHLKEDQTEYLEER     | K | R | 95.00% | 79  | 672.3587  | 3 | 7.6 | 308 | 323 | Yes |
| YESLTDPSK            | R | L | 95.00% | 32  | 1039.4990 | 1 | 4.2 | 183 | 191 | Yes |
| YESLTDPSK            | R | L | 95.00% | 35  | 520.2534  | 2 | 4.0 | 183 | 191 | Yes |
| YESLTDPSKLDGK        | R | E | 95.00% | 86  | 770.3819  | 2 | 1.0 | 113 | 126 | Yes |
| YIDQEELNK            | K | T | 95.00% | 72  | 576.2863  | 2 | 5.2 | 406 | 414 | Yes |
| YYTSASGDEMVSJK       | R | D | 95.00% | 87  | 783.8558  | 2 | 2.6 | 517 | 530 | No  |
| AADESER              | K | G | 95.00% | 29  | 777.3453  | 1 | 9.6 | 83  | 89  | Yes |
| AISEELDHALNDMTSI     | K | - | 95.00% | 65  | 887.9175  | 2 | 5.8 | 233 | 248 | Yes |
| AISEELDHALNDMTSI     | K | - | 95.00% | 35  | 592.2813  | 3 | 6.4 | 233 | 248 | Yes |
| ALKDEEKMEIQEIQLK     | R | E | 95.00% | 95  | 981.0244  | 2 | 7.2 | 98  | 113 | Yes |
| ALKDEEKMEIQEIQLK     | R | E | 95.00% | 46  | 654.3511  | 3 | 5.5 | 98  | 113 | Yes |
| ALKDEEKMEIQEIQLK     | R | E | 95.00% | 38  | 491.0146  | 4 | 4.2 | 98  | 113 | Yes |
| DEEKMEIQEIQLK        | K | E | 95.00% | 47  | 824.9163  | 2 | 8.6 | 101 | 113 | Yes |
| EDKYEEIK             | K | I | 95.00% | 30  | 591.7847  | 2 | 7.0 | 182 | 190 | Yes |
| EQAEAEVASLNR         | R | R | 95.00% | 61  | 658.8309  | 2 | 7.2 | 43  | 54  | No  |
| HIAEEADRKYEEVAR      | K | K | 95.00% | 53  | 908.4615  | 2 | 8.9 | 117 | 131 | Yes |
| ILTDKLEAETR          | K | A | 95.00% | 56  | 708.9106  | 2 | 4.8 | 191 | 202 | Yes |
| IQLVEEELDR           | R | A | 95.00% | 83  | 622.3349  | 2 | 6.8 | 56  | 65  | Yes |
| IQLVEEELDRAQER       | R | L | 95.00% | 66  | 864.4579  | 2 | 8.8 | 56  | 69  | Yes |
| IQLVEEELDRAQER       | R | L | 95.00% | 52  | 576.6364  | 3 | 0.4 | 56  | 69  | Yes |
| IQVLQQQADDAEER       | K | A | 95.00% | 103 | 821.9120  | 2 | 7.5 | 14  | 27  | No  |
| KIQVLQQQADDAEER      | R | A | 95.00% | 100 | 885.9620  | 2 | 9.8 | 13  | 27  | No  |
| KLVIIEGDLER          | R | T | 95.00% | 63  | 642.8848  | 2 | 6.7 | 132 | 142 | Yes |
| KLVIIEGDLER          | R | T | 95.00% | 54  | 428.9252  | 3 | 5.3 | 132 | 142 | Yes |
| KLVIIEGDLERTEER      | R | A | 95.00% | 31  | 900.5034  | 2 | 6.6 | 132 | 146 | Yes |
| KLVIIEGDLERTEER      | R | A | 95.00% | 40  | 600.6729  | 3 | 8.9 | 132 | 146 | Yes |
| LATALQKLEEAEK        | R | A | 95.00% | 87  | 722.4111  | 2 | 5.7 | 70  | 82  | Yes |
| LATALQKLEEAEK        | R | A | 95.00% | 38  | 481.9438  | 3 | 6.8 | 70  | 82  | Yes |
| LATALQKLEEAEKADESER  | R | G | 95.00% | 71  | 734.7194  | 3 | 7.8 | 70  | 89  | Yes |
| LATALQKLEEAEKADESER  | R | G | 95.00% | 30  | 551.2904  | 4 | 5.8 | 70  | 89  | Yes |
| LEEAEKADESER         | K | G | 95.00% | 94  | 738.8469  | 2 | 2.8 | 77  | 89  | Yes |
| LEEAEKADESER         | K | G | 95.00% | 63  | 492.8999  | 3 | 1.4 | 77  | 89  | Yes |
| LEEAEKADESERGMK      | K | V | 95.00% | 62  | 904.9289  | 2 | 9.0 | 77  | 92  | Yes |
| LEEAEKADESERGMK      | K | V | 95.00% | 37  | 603.6193  | 3 | 4.7 | 77  | 92  | Yes |
| LVIIIEGDLER          | K | T | 95.00% | 69  | 578.8371  | 2 | 7.3 | 133 | 142 | Yes |
| MELQEIQLK            | K | E | 95.00% | 51  | 574.3087  | 2 | 5.3 | 105 | 113 | Yes |
| RIQLVEEELDR          | R | A | 95.00% | 73  | 700.3859  | 2 | 6.7 | 55  | 65  | Yes |
| RIQLVEEELDR          | R | A | 95.00% | 60  | 467.2593  | 3 | 5.4 | 55  | 65  | Yes |
| RIQLVEEELDRAQER      | R | L | 95.00% | 41  | 628.6716  | 3 | 2.7 | 55  | 69  | Yes |

M11: Oxidation

M10: Oxidation

M13: Oxidation

M8: Oxidation

M8: Oxidation

M5: Oxidation

M15: Oxidation

M15: Oxidation

M1: Oxidation

|                        |             |        |                                    |                     |                                                                                                                                                                                                                                                                    |             |                                                                                                                                                                                                                                                                                                                                                                                                                                                                                                                                                                                                              |                    |                                              |          |        |     |                |          |     |     |     |     |     |
|------------------------|-------------|--------|------------------------------------|---------------------|--------------------------------------------------------------------------------------------------------------------------------------------------------------------------------------------------------------------------------------------------------------------|-------------|--------------------------------------------------------------------------------------------------------------------------------------------------------------------------------------------------------------------------------------------------------------------------------------------------------------------------------------------------------------------------------------------------------------------------------------------------------------------------------------------------------------------------------------------------------------------------------------------------------------|--------------------|----------------------------------------------|----------|--------|-----|----------------|----------|-----|-----|-----|-----|-----|
| 466                    | IPI00383046 | CMBL   | CARBOXYMETHYLENEBUTENOLIDASE-LIKE. | RIQLVEEELDRAQER     | R                                                                                                                                                                                                                                                                  | L           | 95.00%                                                                                                                                                                                                                                                                                                                                                                                                                                                                                                                                                                                                       | 48                 |                                              | 471.7569 | 4      | 5.3 | 55             | 69       | Yes |     |     |     |     |
|                        |             |        |                                    | TIDDLEDELYAQK       | K                                                                                                                                                                                                                                                                  | L           | 95.00%                                                                                                                                                                                                                                                                                                                                                                                                                                                                                                                                                                                                       | 91                 |                                              | 776.8795 | 2      | 8.1 | 216            | 228      | Yes |     |     |     |     |
|                        |             |        |                                    | TIDDLEDELYAQK       | K                                                                                                                                                                                                                                                                  | L           | 95.00%                                                                                                                                                                                                                                                                                                                                                                                                                                                                                                                                                                                                       | 45                 |                                              | 518.2560 | 3      | 8.8 | 216            | 228      | Yes |     |     |     |     |
|                        |             |        |                                    | YSQKEDKYEIEIK       | K                                                                                                                                                                                                                                                                  | I           | 95.00%                                                                                                                                                                                                                                                                                                                                                                                                                                                                                                                                                                                                       | 78                 |                                              | 844.9086 | 2      | 4.3 | 178            | 190      | Yes |     |     |     |     |
|                        |             |        |                                    | YSQKEDKYEIEIK       | K                                                                                                                                                                                                                                                                  | I           | 95.00%                                                                                                                                                                                                                                                                                                                                                                                                                                                                                                                                                                                                       | 31                 |                                              | 563.6105 | 3      | 8.1 | 178            | 190      | Yes |     |     |     |     |
|                        |             |        |                                    | AGVSVYGIWK          | R                                                                                                                                                                                                                                                                  | D           | 95.00%                                                                                                                                                                                                                                                                                                                                                                                                                                                                                                                                                                                                       | 43                 |                                              | 496.7957 | 2      | 5.7 | 150            | 159      | No  |     |     |     |     |
|                        |             |        |                                    | AGVSVYGIWKDSEDIYNLK | R                                                                                                                                                                                                                                                                  | N           | 95.00%                                                                                                                                                                                                                                                                                                                                                                                                                                                                                                                                                                                                       | 59                 |                                              | 690.7040 | 3      | 9.9 | 150            | 168      | No  |     |     |     |     |
|                        |             |        |                                    | DSEDIYNLK           | K                                                                                                                                                                                                                                                                  | N           | 95.00%                                                                                                                                                                                                                                                                                                                                                                                                                                                                                                                                                                                                       | 70                 |                                              | 548.7646 | 2      | 4.5 | 160            | 168      | No  |     |     |     |     |
|                        |             |        |                                    | DVSLLTQK            | K                                                                                                                                                                                                                                                                  | L           | 95.00%                                                                                                                                                                                                                                                                                                                                                                                                                                                                                                                                                                                                       | 59                 |                                              | 903.5233 | 1      | 8.9 | 186            | 193      | No  |     |     |     |     |
|                        |             |        |                                    | DVSLLTQK            | K                                                                                                                                                                                                                                                                  | L           | 95.00%                                                                                                                                                                                                                                                                                                                                                                                                                                                                                                                                                                                                       | 37                 |                                              | 452.2645 | 2      | 6.6 | 186            | 193      | No  |     |     |     |     |
|                        |             |        |                                    | LEYGGLGR            | R                                                                                                                                                                                                                                                                  | E           | 95.00%                                                                                                                                                                                                                                                                                                                                                                                                                                                                                                                                                                                                       | 32                 |                                              | 432.7352 | 2      | 5.2 | 16             | 23       | No  |     |     |     |     |
|                        |             |        |                                    | NLIEWLNK            | R                                                                                                                                                                                                                                                                  | Y           | 95.00%                                                                                                                                                                                                                                                                                                                                                                                                                                                                                                                                                                                                       | 40                 |                                              | 515.2954 | 2      | 9.1 | 236            | 243      | No  |     |     |     |     |
|                        |             |        |                                    | TFSGQTHGFVHR        | K                                                                                                                                                                                                                                                                  | K           | 95.00%                                                                                                                                                                                                                                                                                                                                                                                                                                                                                                                                                                                                       | 68                 |                                              | 687.3440 | 2      | 6.3 | 206            | 217      | No  |     |     |     |     |
|                        |             |        |                                    | 467                 | IPI00011454; IPI00383581; IPI00441414; IPI00472068                                                                                                                                                                                                                 | GANAB       | ISOFORM 2 OF NEUTRAL ALPHA-GLUCOSIDASE AB PRECURSOR.; ISOFORM 1 OF NEUTRAL ALPHA-GLUCOSIDASE AB PRECURSOR.; ISOFORM 3 OF NEUTRAL ALPHA-GLUCOSIDASE AB PRECURSOR.; 107 KDA PROTEIN.                                                                                                                                                                                                                                                                                                                                                                                                                           | DVHNIYGLVHMATADGLR | R                                            | Q        | 95.00% | 34  | M12: Oxidation | 721.0276 | 3   | 8.0 | 570 | 588 | No  |
| LSFOHDPETSVLVLR        | R           | K      | 95.00%                             |                     |                                                                                                                                                                                                                                                                    |             |                                                                                                                                                                                                                                                                                                                                                                                                                                                                                                                                                                                                              | 52                 |                                              | 580.9842 | 3      | 5.0 | 915            | 929      | No  |     |     |     |     |
| MMDYLQSGGETPQTDVDR     | K           | W      | 95.00%                             |                     |                                                                                                                                                                                                                                                                    |             |                                                                                                                                                                                                                                                                                                                                                                                                                                                                                                                                                                                                              | 87                 | M1: Oxidation, M2: Oxidation                 | 980.4322 | 2      | 6.9 | 338            | 354      | No  |     |     |     |     |
| QYASLTGTQALPPLFSLGYHQS | R           | W      | 95.00%                             |                     |                                                                                                                                                                                                                                                                    |             |                                                                                                                                                                                                                                                                                                                                                                                                                                                                                                                                                                                                              | 91                 |                                              | 845.7800 | 3      | 9.8 | 400            | 422      | No  |     |     |     |     |
| R                      | R           | G      | 95.00%                             |                     |                                                                                                                                                                                                                                                                    |             |                                                                                                                                                                                                                                                                                                                                                                                                                                                                                                                                                                                                              | 38                 |                                              | 486.7988 | 2      | 5.8 | 165            | 173      | No  |     |     |     |     |
| VSQGSKDPAEGDGAQPEETPR  | R           | D      | 95.00%                             |                     |                                                                                                                                                                                                                                                                    |             |                                                                                                                                                                                                                                                                                                                                                                                                                                                                                                                                                                                                              | 36                 |                                              | 719.0081 | 3      | 8.3 | 186            | 206      | No  |     |     |     |     |
| VVIIGAGKPAAVVLQTK      | R           | G      | 95.00%                             |                     |                                                                                                                                                                                                                                                                    |             |                                                                                                                                                                                                                                                                                                                                                                                                                                                                                                                                                                                                              | 51                 |                                              | 555.3565 | 3      | 3.7 | 892            | 908      | No  |     |     |     |     |
| YRVPDVLVADPPPIAR       | R           | L      | 95.00%                             |                     |                                                                                                                                                                                                                                                                    |             |                                                                                                                                                                                                                                                                                                                                                                                                                                                                                                                                                                                                              | 30                 |                                              | 560.9897 | 3      | 5.5 | 113            | 127      | No  |     |     |     |     |
| EKEDPEPSTDGTYVVK       | R           | I      | 95.00%                             |                     |                                                                                                                                                                                                                                                                    |             |                                                                                                                                                                                                                                                                                                                                                                                                                                                                                                                                                                                                              | 86                 |                                              | 940.9373 | 2      | 6.0 | 391            | 406      | No  |     |     |     |     |
| FLNEMIAVPMR            | K           | V      | 95.00%                             |                     |                                                                                                                                                                                                                                                                    |             |                                                                                                                                                                                                                                                                                                                                                                                                                                                                                                                                                                                                              | 49                 | M5: Oxidation, M10: Oxidation                | 676.8424 | 2      | 4.7 | 212            | 222      | No  |     |     |     |     |
| IAIIGAGIGGTSAAAYLR     | K           | Q      | 95.00%                             |                     |                                                                                                                                                                                                                                                                    |             |                                                                                                                                                                                                                                                                                                                                                                                                                                                                                                                                                                                                              | 99                 |                                              | 884.0024 | 2      | 9.3 | 37             | 54       | No  |     |     |     |     |
| IFSQETLTK              | K           | A      | 95.00%                             |                     |                                                                                                                                                                                                                                                                    |             |                                                                                                                                                                                                                                                                                                                                                                                                                                                                                                                                                                                                              | 38                 |                                              | 533.7951 | 2      | 3.5 | 407            | 415      | No  |     |     |     |     |
| LATMMVQGQYEAGGSVIHPLN  | R           | R      | 95.00%                             |                     |                                                                                                                                                                                                                                                                    |             |                                                                                                                                                                                                                                                                                                                                                                                                                                                                                                                                                                                                              | 53                 | M4: Oxidation, M5: Oxidation, M25: Oxidation | 968.1421 | 3      | 7.2 | 75             | 100      | No  |     |     |     |     |
| LHMK                   | R           | R      | 95.00%                             |                     |                                                                                                                                                                                                                                                                    |             |                                                                                                                                                                                                                                                                                                                                                                                                                                                                                                                                                                                                              | 41                 | M4: Oxidation, M5: Oxidation, M25: Oxidation | 726.3574 | 4      | 5.7 | 75             | 100      | No  |     |     |     |     |
| LHMK                   | R           | R      | 95.00%                             | 41                  |                                                                                                                                                                                                                                                                    | 609.8279    | 2                                                                                                                                                                                                                                                                                                                                                                                                                                                                                                                                                                                                            | 5.6                | 421                                          | 430      | No     |     |                |          |     |     |     |     |     |
| LFLSYDYAVK             | K           | K      | 95.00%                             | 41                  |                                                                                                                                                                                                                                                                    | 609.8279    | 2                                                                                                                                                                                                                                                                                                                                                                                                                                                                                                                                                                                                            | 5.6                | 421                                          | 430      | No     |     |                |          |     |     |     |     |     |
| 468                    | IPI00384280 | PCYOX1 | PRENYLCYSTEINE OXIDASE PRECURSOR.  | MHMWVEDVLDK         | R                                                                                                                                                                                                                                                                  | F           | 95.00%                                                                                                                                                                                                                                                                                                                                                                                                                                                                                                                                                                                                       | 42                 | M1: Oxidation, M3: Oxidation                 | 717.8300 | 2      | 8.7 | 152            | 162      | No  |     |     |     |     |
|                        |             |        |                                    | MYEVVYQIGTETR       | K                                                                                                                                                                                                                                                                  | S           | 95.00%                                                                                                                                                                                                                                                                                                                                                                                                                                                                                                                                                                                                       | 86                 |                                              | 802.8893 | 2      | 4.8 | 292            | 304      | No  |     |     |     |     |
|                        |             |        |                                    | SDFYDIVLVATPLNR     | R                                                                                                                                                                                                                                                                  | K           | 95.00%                                                                                                                                                                                                                                                                                                                                                                                                                                                                                                                                                                                                       | 52                 |                                              | 861.9645 | 2      | 8.3 | 305            | 319      | No  |     |     |     |     |
|                        |             |        |                                    | SDFYDIVLVATPLNR     | R                                                                                                                                                                                                                                                                  | K           | 95.00%                                                                                                                                                                                                                                                                                                                                                                                                                                                                                                                                                                                                       | 57                 |                                              | 574.9751 | 3      | 1.6 | 305            | 319      | No  |     |     |     |     |
|                        |             |        |                                    | SNLISGSMYIEEK       | K                                                                                                                                                                                                                                                                  | T           | 95.00%                                                                                                                                                                                                                                                                                                                                                                                                                                                                                                                                                                                                       | 90                 | M9: Oxidation                                | 793.3979 | 2      | 6.2 | 267            | 280      | No  |     |     |     |     |
|                        |             |        |                                    | TLLETQK             | R                                                                                                                                                                                                                                                                  | A           | 95.00%                                                                                                                                                                                                                                                                                                                                                                                                                                                                                                                                                                                                       | 29                 |                                              | 473.2865 | 2      | 3.1 | 198            | 205      | No  |     |     |     |     |
|                        |             |        |                                    | YGFQSLR             | R                                                                                                                                                                                                                                                                  | M           | 95.00%                                                                                                                                                                                                                                                                                                                                                                                                                                                                                                                                                                                                       | 40                 |                                              | 435.7293 | 2      | 3.9 | 145            | 151      | No  |     |     |     |     |
|                        |             |        |                                    | YQSHDYAFSSVEK       | R                                                                                                                                                                                                                                                                  | L           | 95.00%                                                                                                                                                                                                                                                                                                                                                                                                                                                                                                                                                                                                       | 87                 |                                              | 780.8585 | 2      | 7.9 | 169            | 181      | No  |     |     |     |     |
|                        |             |        |                                    | 469                 | IPI00384938; IPI00423463; IPI00423464; IPI00423466; IPI00448925; IPI00448938; IPI00472610; IPI00645363; IPI00761159; IPI00784810; IPI00784817; IPI00784822; IPI00784828; IPI00784842; IPI00785084; IPI00807531; IPI00815926; IPI00816314; IPI00816681; IPI00829944 | IGHG1; IGHM | HYPOTHETICAL PROTEIN DKFZP686N02209.; HYPOTHETICAL PROTEIN DKFZP686O01196.; HYPOTHETICAL PROTEIN DKFZP686K03196.; HYPOTHETICAL PROTEIN DKFZP686H20196.; IGHG1 PROTEIN.; IGHG1 PROTEIN.; IGHM PROTEIN.; HYPOTHETICAL PROTEIN DKFZP686P15220.; IGHM PROTEIN.; IGHG1 PROTEIN.; ANTI-RHD MONOCLONAL T125 GAMMA1 HEAVY CHAIN PRECURSOR.; IGHV4-31 PROTEIN.; HYPOTHETICAL PROTEIN DKFZP686C11235.; HYPOTHETICAL PROTEIN DKFZP686G11190.; HYPOTHETICAL PROTEIN IGHG1.; IGHG1 PROTEIN.; IGHG1 PROTEIN.; HYPOTHETICAL PROTEIN DKFZP686I15196.; HEPATITIS B VIRUS RECEPTOR BINDING PROTEIN (FRAGMENT).; IGHG1 PROTEIN. | ALPAPIEK           | K                                            | T        | 95.00% | 34  |                | 838.5054 | 1   | 1.7 | 355 | 362 | No  |
|                        |             |        |                                    |                     |                                                                                                                                                                                                                                                                    |             |                                                                                                                                                                                                                                                                                                                                                                                                                                                                                                                                                                                                              | DTLMISR            | K                                            | T        | 95.00% | 53  | M4: Oxidation  | 426.2194 | 2   | 1.4 | 277 | 283 | Yes |
|                        |             |        |                                    |                     |                                                                                                                                                                                                                                                                    |             |                                                                                                                                                                                                                                                                                                                                                                                                                                                                                                                                                                                                              | EPQVYTLPPSR        | R                                            | D        | 95.00% | 48  |                | 643.8439 | 2   | 4.3 | 373 | 383 | No  |
|                        |             |        |                                    |                     |                                                                                                                                                                                                                                                                    |             |                                                                                                                                                                                                                                                                                                                                                                                                                                                                                                                                                                                                              | EPQVYTLPPSRDELTK   | R                                            | N        | 95.00% | 69  |                | 936.9926 | 2   | 3.5 | 373 | 388 | No  |
|                        |             |        |                                    |                     |                                                                                                                                                                                                                                                                    |             |                                                                                                                                                                                                                                                                                                                                                                                                                                                                                                                                                                                                              | EPQVYTLPPSRDELTK   | R                                            | N        | 95.00% | 36  |                | 624.9998 | 3   | 6.8 | 373 | 388 | No  |



|     |                          |                  |                                      |                                                                                                                                          |   |   |        |     |                                                                                                                                            |           |   |      |      |      |     |
|-----|--------------------------|------------------|--------------------------------------|------------------------------------------------------------------------------------------------------------------------------------------|---|---|--------|-----|--------------------------------------------------------------------------------------------------------------------------------------------|-----------|---|------|------|------|-----|
|     |                          |                  |                                      | KKEEELVALK                                                                                                                               | R | E | 95.00% | 44  |                                                                                                                                            | 439.2566  | 3 | 4.9  | 77   | 87   | Yes |
|     |                          |                  |                                      | KPLNIDHLGEDK                                                                                                                             | R | L | 95.00% | 35  |                                                                                                                                            | 689.8743  | 2 | 5.3  | 178  | 189  | Yes |
|     |                          |                  |                                      | KPLNIDHLGEDKLR                                                                                                                           | R | D | 95.00% | 51  |                                                                                                                                            | 549.9822  | 3 | 7.6  | 178  | 191  | Yes |
|     |                          |                  |                                      | KPLNIDHLGEDKLR                                                                                                                           | R | D | 95.00% | 40  |                                                                                                                                            | 412.7382  | 4 | 6.7  | 178  | 191  | Yes |
|     |                          |                  |                                      | RKPLNIDHLGEDK                                                                                                                            | R | L | 95.00% | 43  |                                                                                                                                            | 767.9283  | 2 | 9.4  | 177  | 189  | Yes |
|     |                          |                  |                                      | RKPLNIDHLGEDK                                                                                                                            | R | L | 95.00% | 41  |                                                                                                                                            | 512.2858  | 3 | 4.8  | 177  | 189  | Yes |
|     |                          |                  |                                      | VDFDDIQK                                                                                                                                 | K | K | 95.00% | 32  |                                                                                                                                            | 490.2428  | 2 | 4.0  | 48   | 55   | No  |
|     |                          |                  |                                      | YDIMNVR                                                                                                                                  | K | A | 95.00% | 35  | M4: Oxidation                                                                                                                              | 463.7263  | 2 | 4.4  | 220  | 226  | No  |
|     |                          |                  |                                      | SMOOTHELIN-LIKE 2.; CDNA FLJ42461 FIS, CLONE BRACE2026836, MODERATELY SIMILAR TO MUSMUSCULUS SMOOTHELIN L1, LARGE ISOFORM.               |   |   |        |     |                                                                                                                                            |           |   |      |      |      |     |
| 472 | IPI00394847; IPI00784051 | SMTNL2           |                                      | LPHQPVTATR                                                                                                                               | R | V | 95.00% | 27  |                                                                                                                                            | 411.5769  | 3 | 2.8  | 192  | 202  | No  |
|     |                          |                  |                                      | NSSFTWSVPSSGYGAVTASK                                                                                                                     | K | H | 95.00% | 64  |                                                                                                                                            | 1016.9940 | 2 | 9.0  | 246  | 265  | No  |
|     |                          |                  |                                      | SQSFVAVASSIK                                                                                                                             | R | Q | 95.00% | 47  | S3: Phospho                                                                                                                                | 674.8154  | 2 | 6.1  | 342  | 354  | No  |
|     |                          |                  |                                      | SQSFVAVASSIK                                                                                                                             | R | Q | 95.00% | 40  |                                                                                                                                            | 634.8326  | 2 | 7.0  | 342  | 354  | No  |
|     |                          |                  |                                      | YEAALEGAVR                                                                                                                               | R | A | 95.00% | 34  |                                                                                                                                            | 539.7838  | 2 | 6.0  | 20   | 29   | No  |
|     |                          |                  |                                      | ISOFORM HEART OF ATP SYNTHASE GAMMA CHAIN, MITOCHONDRIAL PRECURSOR.; ISOFORM LIVER OF ATP SYNTHASE GAMMA CHAIN, MITOCHONDRIAL PRECURSOR. |   |   |        |     |                                                                                                                                            |           |   |      |      |      |     |
| 473 | IPI00395769; IPI00478410 | ATP5C1           |                                      | EVMLVIGIGDK                                                                                                                              | K | I | 95.00% | 58  | M3: Oxidation                                                                                                                              | 538.7900  | 2 | 5.4  | 127  | 136  | No  |
|     |                          |                  |                                      | HLLIGVSSDR                                                                                                                               | K | G | 95.00% | 70  |                                                                                                                                            | 548.8119  | 2 | 4.1  | 91   | 100  | No  |
|     |                          |                  |                                      | IYGLGSLALYEK                                                                                                                             | R | A | 95.00% | 88  |                                                                                                                                            | 663.8752  | 2 | 8.7  | 68   | 79   | No  |
|     |                          |                  |                                      | SEVATLTAAGK                                                                                                                              | K | E | 95.00% | 66  |                                                                                                                                            | 524.2917  | 2 | 6.5  | 116  | 126  | No  |
|     |                          |                  |                                      | THSDQFLVAFK                                                                                                                              | R | E | 95.00% | 80  |                                                                                                                                            | 646.8412  | 2 | 8.1  | 144  | 154  | No  |
|     |                          |                  |                                      | THSDQFLVAFK                                                                                                                              | R | E | 95.00% | 48  |                                                                                                                                            | 431.5630  | 3 | 7.1  | 144  | 154  | No  |
|     |                          |                  |                                      | ISOFORM 1 OF MICROTUBULE-ASSOCIATED PROTEIN 4.; MICROTUBULE-ASSOCIATED PROTEIN 4 ISOFORM 1 VARIANT (FRAGMENT).                           |   |   |        |     |                                                                                                                                            |           |   |      |      |      |     |
| 474 | IPI00396171; IPI00745518 | MAP4             |                                      | DMAQLPETEIAPAK                                                                                                                           | K | D | 95.00% | 31  | M2: Oxidation                                                                                                                              | 765.3783  | 2 | -2.4 | 505  | 518  | No  |
|     |                          |                  |                                      |                                                                                                                                          |   |   |        |     | M2: Oxidation, M6: Oxidation, M10: Oxidation, M10: Oxidation, M2: Oxidation, M10: Oxidation, M4: Oxidation, M18: Oxidation, M19: Oxidation |           |   |      |      |      |     |
|     |                          |                  |                                      | DMQPSMESDMALVK                                                                                                                           | K | D | 95.00% | 73  |                                                                                                                                            | 815.3484  | 2 | 4.9  | 319  | 332  | No  |
|     |                          |                  |                                      | DMSPLSETEMALGK                                                                                                                           | K | D | 95.00% | 34  |                                                                                                                                            | 770.8549  | 2 | 9.3  | 533  | 546  | No  |
|     |                          |                  |                                      | EIEMASEERPPAQALEIMMGLK                                                                                                                   | K | T | 95.00% | 38  |                                                                                                                                            | 841.0787  | 3 | 8.5  | 253  | 274  | No  |
|     |                          |                  |                                      | LATNTSAPDLK                                                                                                                              | R | N | 95.00% | 43  |                                                                                                                                            | 565.8112  | 2 | 7.7  | 951  | 961  | Yes |
|     |                          |                  |                                      | NVVLPTETEVAPEAK                                                                                                                          | K | D | 95.00% | 33  |                                                                                                                                            | 734.4115  | 2 | 6.2  | 361  | 374  | No  |
|     |                          |                  |                                      | TDYIPLLDVDEK                                                                                                                             | K | T | 95.00% | 31  |                                                                                                                                            | 710.8601  | 2 | -6.4 | 73   | 84   | No  |
|     |                          |                  |                                      | VALSSETEVALAR                                                                                                                            | K | D | 95.00% | 86  |                                                                                                                                            | 673.3754  | 2 | 7.6  | 464  | 476  | No  |
|     |                          |                  |                                      | VGSLDNVGHLPAGGAVK                                                                                                                        | K | I | 95.00% | 68  |                                                                                                                                            | 795.9405  | 2 | 7.9  | 1099 | 1115 | No  |
|     |                          |                  |                                      | ISOFORM B1 OF HETEROGENEOUS NUCLEAR RIBONUCLEOPROTEINS A2/B1.; ISOFORM A2 OF HETEROGENEOUS NUCLEAR RIBONUCLEOPROTEINS A2/B1.             |   |   |        |     |                                                                                                                                            |           |   |      |      |      |     |
| 475 | IPI00396378; IPI00414696 | HNRPA2B1         |                                      | GGGNGFGPGGSNFR                                                                                                                           | R | G | 95.00% | 45  |                                                                                                                                            | 689.3212  | 2 | 3.3  | 214  | 228  | No  |
|     |                          |                  |                                      | GGNFGFGDSR                                                                                                                               | R | G | 95.00% | 36  |                                                                                                                                            | 507.2288  | 2 | 5.7  | 204  | 213  | No  |
|     |                          |                  |                                      | IDTIEITDR                                                                                                                                | K | Q | 95.00% | 78  |                                                                                                                                            | 594.8332  | 2 | 9.0  | 126  | 135  | No  |
|     |                          |                  |                                      | ISOFORM 1 OF NSFL1 COFACTOR P47.; ISOFORM 3 OF NSFL1 COFACTOR P47.                                                                       |   |   |        |     |                                                                                                                                            |           |   |      |      |      |     |
| 476 | IPI00100197; IPI00397571 | NSFL1C           |                                      | ASSSILIDSEPTTNIQIR                                                                                                                       | K | L | 95.00% | 112 |                                                                                                                                            | 1037.5450 | 2 | 7.9  | 283  | 301  | No  |
|     |                          |                  |                                      | ASSSILIDSEPTTNIQIR                                                                                                                       | K | L | 95.00% | 40  |                                                                                                                                            | 692.0315  | 3 | 5.8  | 285  | 303  | No  |
|     |                          |                  |                                      | DLIHDQDEDEEEEEQQR                                                                                                                        | R | F | 95.00% | 41  |                                                                                                                                            | 1043.4380 | 2 | 9.1  | 77   | 93   | No  |
|     |                          |                  |                                      | DLIHDQDEDEEEEEQQR                                                                                                                        | R | F | 95.00% | 46  |                                                                                                                                            | 695.9582  | 3 | 4.9  | 77   | 93   | No  |
|     |                          |                  |                                      | DLIHDQDEDEEEEEQQR                                                                                                                        | R | S | 95.00% | 33  |                                                                                                                                            | 695.9609  | 3 | 8.7  | 77   | 93   | No  |
|     |                          |                  |                                      | EFVAVTGAEDR                                                                                                                              | R | A | 95.00% | 51  |                                                                                                                                            | 661.8194  | 2 | 6.1  | 11   | 22   | No  |
|     |                          |                  |                                      | LGAAPPEESAYVAGEK                                                                                                                         | R | R | 95.00% | 45  |                                                                                                                                            | 810.8952  | 2 | 4.2  | 157  | 172  | No  |
|     |                          |                  |                                      | LGSTAPQVLSTSSPAQAENEA                                                                                                                    | K | A | 95.00% | 60  |                                                                                                                                            | 772.0582  | 3 | 2.6  | 262  | 284  | No  |
|     |                          |                  |                                      | SGFSLDNGELR                                                                                                                              | K | S | 95.00% | 49  |                                                                                                                                            | 597.7938  | 2 | 3.6  | 189  | 199  | No  |
|     |                          |                  |                                      | SPNELVDDLFK                                                                                                                              | K | G | 95.00% | 63  |                                                                                                                                            | 638.8312  | 2 | 9.4  | 114  | 124  | No  |
|     |                          |                  |                                      | SYQDPSNAQFLESIR                                                                                                                          | R | R | 95.00% | 106 |                                                                                                                                            | 877.9269  | 2 | 6.3  | 202  | 216  | No  |
|     |                          |                  |                                      | HYPOTHETICAL PROTEIN DKFZP779B0247.; ISOFORM LONG OF COLD SHOCK DOMAIN-CONTAINING PROTEIN E1.                                            |   |   |        |     |                                                                                                                                            |           |   |      |      |      |     |
| 477 | IPI00398121; IPI00470891 | CSDE1            |                                      | IKQEILPEER                                                                                                                               | K | M | 95.00% | 37  |                                                                                                                                            | 627.8621  | 2 | 8.3  | 136  | 145  | No  |
|     |                          |                  |                                      | NITLDDASAPR                                                                                                                              | K | L | 95.00% | 44  |                                                                                                                                            | 586.8018  | 2 | 3.9  | 774  | 784  | No  |
| 478 | IPI00398958              | LOC387867        | SIMILAR TO 40S RIBOSOMAL PROTEIN SA. | FAAATGATPIAGR                                                                                                                            | K | F | 95.00% | 28  |                                                                                                                                            | 602.3312  | 2 | 4.9  | 90   | 102  | Yes |
|     |                          |                  |                                      | LLVVTDP                                                                                                                                  | R | A | 95.00% | 34  |                                                                                                                                            | 456.7806  | 2 | 1.7  | 121  | 128  | No  |
|     |                          |                  |                                      | PROTEIN PHOSPHATASE INHIBITOR 2.; PPP1R2P3 PROTEIN.                                                                                      |   |   |        |     |                                                                                                                                            |           |   |      |      |      |     |
| 479 | IPI00220402; IPI00410126 | PPP1R2; PPP1R2P3 |                                      | IQEQESSGEEDSDLSPEER                                                                                                                      | R | E | 95.00% | 44  |                                                                                                                                            | 1082.4630 | 2 | 0.5  | 116  | 134  | No  |
|     |                          |                  |                                      | KLAAAEGLEPK                                                                                                                              | K | Y | 95.00% | 53  |                                                                                                                                            | 563.8312  | 2 | 6.4  | 103  | 113  | No  |
|     |                          |                  |                                      | TSTTSMVASAEQPR                                                                                                                           | K | R | 95.00% | 90  | M7: Oxidation                                                                                                                              | 784.8716  | 2 | 8.2  | 19   | 33   | No  |

MYOSIN BINDING PROTEIN C, SLOW TYPE  
ISOFORM 1.

|                          |   |   |        |     |                |           |   |      |      |      |     |
|--------------------------|---|---|--------|-----|----------------|-----------|---|------|------|------|-----|
| ADAAEYSVMTTGGQSSAK       | K | L | 95.00% | 139 | M9: Oxidation  | 895.4062  | 2 | 7.3  | 433  | 450  | Yes |
| ADAAEYSVMTTGGQSSAK       | K | L | 95.00% | 71  | M9: Oxidation  | 597.2717  | 3 | 4.5  | 433  | 450  | Yes |
| ADAAEYSVMTTGGQSSAK       | K | L | 95.00% | 123 |                | 887.4032  | 2 | 1.1  | 433  | 450  | Yes |
| ADAAEYSVMTTGGQSSAK       | K | L | 95.00% | 76  |                | 591.9394  | 3 | 3.4  | 433  | 450  | Yes |
| AIMEGSGR                 | K | I | 95.00% | 50  | M3: Oxidation  | 418.7039  | 2 | 7.5  | 590  | 597  | Yes |
| AKDNFAGNYR               | K | C | 95.00% | 58  |                | 578.2838  | 2 | 4.3  | 157  | 166  | Yes |
| AVNAAGASEPK              | K | Y | 95.00% | 63  |                | 507.7670  | 2 | 4.1  | 819  | 829  | Yes |
| AVNDLGTVEIECK            | K | L | 95.00% | 96  |                | 695.8511  | 2 | 4.0  | 1128 | 1140 | Yes |
| DDGNAITGYTIQK            | K | A | 95.00% | 85  |                | 733.8652  | 2 | 6.5  | 964  | 977  | Yes |
| DDSGVYHINLK              | R | N | 95.00% | 70  |                | 630.8180  | 2 | 4.6  | 617  | 627  | Yes |
| DGAEIDKNQINIR            | K | N | 95.00% | 97  |                | 743.3899  | 2 | 3.8  | 883  | 895  | Yes |
| DGAEIDKNQINIR            | K | N | 95.00% | 69  |                | 495.9286  | 3 | 2.5  | 883  | 895  | Yes |
| DNFAGNYR                 | K | C | 95.00% | 39  |                | 956.4313  | 1 | 9.2  | 159  | 166  | Yes |
| DNFAGNYR                 | K | C | 95.00% | 41  |                | 478.7162  | 2 | 2.2  | 159  | 166  | Yes |
| DSDWTLVETPPGEEQAK        | K | Q | 95.00% | 86  |                | 951.4490  | 2 | 6.7  | 58   | 74   | No  |
| EAGTTPAKDEEEVSPPSALPPG   |   |   |        |     |                |           |   |      |      |      |     |
| LGSR                     | K | A | 95.00% | 55  |                | 864.7709  | 3 | 6.8  | 27   | 52   | No  |
| EENEVPAPAPPPPEESKEK      | K | E | 95.00% | 56  |                | 1037.5070 | 2 | 3.4  | 8    | 26   | Yes |
| EIIPEPK                  | K | I | 95.00% | 43  |                | 825.4747  | 1 | 2.8  | 839  | 845  | Yes |
| EIIPEPKIR                | K | I | 95.00% | 26  |                | 547.8343  | 2 | 3.0  | 839  | 847  | Yes |
| EPPIMVTK                 | R | Q | 95.00% | 47  | M5: Oxidation  | 465.7539  | 2 | 3.1  | 364  | 371  | Yes |
| EPPIMVTK                 | R | Q | 95.00% | 34  |                | 457.7560  | 2 | 2.0  | 364  | 371  | Yes |
| EVKQEEEEPOVDVWELLK       | R | N | 95.00% | 33  |                | 742.7187  | 3 | 4.9  | 223  | 240  | Yes |
| FTITGLPTDAK              | K | I | 95.00% | 27  |                | 1163.6410 | 1 | 8.1  | 802  | 812  | Yes |
| FTITGLPTDAK              | K | I | 95.00% | 67  |                | 582.3214  | 2 | 3.0  | 802  | 812  | Yes |
| FVETASIDIQIIDRPGPPQIVK   | K | I | 95.00% | 65  |                | 812.7964  | 3 | 9.4  | 925  | 946  | Yes |
| FVVELADPK                | R | L | 95.00% | 68  |                | 509.2860  | 2 | 1.9  | 297  | 305  | Yes |
| FVVELADPKLEVK            | R | W | 95.00% | 71  |                | 743.9330  | 2 | 3.9  | 297  | 309  | Yes |
| FVVELADPKLEVK            | R | W | 95.00% | 66  |                | 496.2915  | 3 | 4.4  | 297  | 309  | Yes |
| GKWMDLASK                | K | A | 95.00% | 34  | M4: Oxidation  | 526.2684  | 2 | 3.9  | 122  | 130  | Yes |
| HILIEGATK                | K | A | 95.00% | 54  |                | 1094.6640 | 1 | 5.8  | 423  | 432  | Yes |
| HILIEGATK                | K | A | 95.00% | 66  |                | 547.8336  | 2 | 1.6  | 423  | 432  | Yes |
| IAFYQGITDLR              | K | G | 95.00% | 78  |                | 648.8547  | 2 | 4.7  | 250  | 260  | Yes |
| IEDVWGENVALTWTPPK        | K | D | 95.00% | 112 |                | 978.0048  | 2 | 5.1  | 947  | 963  | Yes |
| IEDVWGENVALTWTPPKDDGNA   |   |   |        |     |                |           |   |      |      |      |     |
| AITGYTIQK                | K | A | 95.00% | 56  |                | 1134.9090 | 3 | 7.6  | 947  | 977  | Yes |
| IFAVNAIGISK              | R | P | 95.00% | 48  |                | 1132.6820 | 1 | 8.1  | 719  | 729  | Yes |
| IFAVNAIGISK              | R | P | 95.00% | 112 |                | 566.8414  | 2 | 1.6  | 719  | 729  | Yes |
| IFAVNAIGISKPSMPSR        | R | P | 95.00% | 56  | M14: Oxidation | 902.5020  | 2 | 9.4  | 719  | 735  | Yes |
| IFAVNAIGISKPSMPSR        | R | P | 95.00% | 75  | M14: Oxidation | 602.0012  | 3 | 4.9  | 719  | 735  | Yes |
| IFAVNAIGISKPSMPSR        | R | P | 95.00% | 41  |                | 596.6678  | 3 | 2.0  | 719  | 735  | Yes |
| IILDGLDADNTVTVIAGNK      | K | L | 95.00% | 162 |                | 971.5355  | 2 | 6.8  | 549  | 567  | Yes |
| IILDGLDADNTVTVIAGNK      | K | L | 95.00% | 73  |                | 648.0248  | 3 | 4.7  | 549  | 567  | Yes |
| ILDPAYQVDK               | K | G | 95.00% | 37  |                | 1161.6200 | 1 | 3.4  | 282  | 291  | Yes |
| ILDPAYQVDK               | K | G | 95.00% | 87  |                | 581.3116  | 2 | -0.4 | 282  | 291  | Yes |
| ILDPAYQVDKGGR            | K | V | 95.00% | 47  |                | 716.3871  | 2 | 4.6  | 282  | 294  | Yes |
| ILTPLTDQTVNLGK           | K | E | 95.00% | 96  |                | 756.9391  | 2 | 4.3  | 460  | 473  | Yes |
| ILTPLTDQTVNLGK           | K | E | 95.00% | 47  |                | 504.9620  | 3 | 4.2  | 460  | 473  | Yes |
| IRTESYDPSSTLVIDIAER      | R | D | 95.00% | 57  |                | 722.3801  | 3 | 7.1  | 598  | 616  | Yes |
| IRTESYDPSSTLVIDIAERDDSGV |   |   |        |     |                |           |   |      |      |      |     |
| YHINLK                   | R | N | 95.00% | 78  |                | 852.4421  | 4 | 9.4  | 598  | 627  | Yes |
| KDGAEIDKNQINIR           | K | N | 95.00% | 107 |                | 807.4402  | 2 | 7.0  | 882  | 895  | Yes |
| KDGAEIDKNQINIR           | K | N | 95.00% | 57  |                | 538.6268  | 3 | 2.1  | 882  | 895  | Yes |
| KDGAEIDKNQINIR           | K | N | 95.00% | 33  |                | 404.2223  | 4 | 2.9  | 882  | 895  | Yes |
| KDSDWTLVETPPGEEQAK       | R | Q | 95.00% | 61  | S3: Phospho    | 1055.4810 | 2 | 7.3  | 57   | 74   | No  |
| KDSDWTLVETPPGEEQAK       | R | Q | 95.00% | 137 |                | 1015.4990 | 2 | 8.8  | 57   | 74   | No  |
| KDSDWTLVETPPGEEQAK       | R | Q | 95.00% | 47  |                | 677.3334  | 3 | 6.0  | 57   | 74   | No  |
| KEENEVPAPAPPPPEEPSK      | K | E | 95.00% | 89  |                | 972.9900  | 2 | 8.3  | 7    | 24   | Yes |
| KEENEVPAPAPPPPEEPSKEK    | K | E | 95.00% | 47  |                | 1101.5590 | 2 | 7.8  | 7    | 26   | Yes |
| KEENEVPAPAPPPPEEPSKEK    | K | E | 95.00% | 57  |                | 734.7073  | 3 | 5.9  | 7    | 26   | Yes |
| KHILIEGATK               | K | A | 95.00% | 53  |                | 611.8817  | 2 | 2.5  | 422  | 432  | Yes |
| KHILIEGATK               | K | A | 95.00% | 59  |                | 408.2568  | 3 | 1.8  | 422  | 432  | Yes |
| KMIEGVAYEVR              | K | I | 95.00% | 74  | M2: Oxidation  | 655.8452  | 2 | 3.6  | 708  | 718  | Yes |
| KMIEGVAYEVR              | K | I | 95.00% | 42  | M2: Oxidation  | 437.5661  | 3 | 3.6  | 708  | 718  | Yes |
| KMIEGVAYEVR              | K | I | 95.00% | 90  |                | 647.8469  | 2 | 2.3  | 708  | 718  | Yes |
| KMIEGVAYEVR              | K | I | 95.00% | 50  |                | 432.2339  | 3 | 2.5  | 708  | 718  | Yes |
| LEIPISGEPPPK             | R | A | 95.00% | 64  |                | 638.8652  | 2 | 5.5  | 570  | 581  | Yes |
| LEIPISGEPPPK             | R | A | 95.00% | 42  |                | 426.2447  | 3 | 2.3  | 570  | 581  | Yes |
| LRLEIPISGEPPPK           | K | A | 95.00% | 66  |                | 773.4575  | 2 | 4.1  | 568  | 581  | Yes |

|                           |     |   |   |        |     |                                  |           |   |      |      |      |     |
|---------------------------|-----|---|---|--------|-----|----------------------------------|-----------|---|------|------|------|-----|
| LRLEIPISGEP               | PPK | K | A | 95.00% | 64  |                                  | 515.9741  | 3 | 3.7  | 568  | 581  | Yes |
| LSVDLKLK                  |     | K | I | 95.00% | 41  |                                  | 1012.6450 | 1 | 3.6  | 451  | 459  | Yes |
| LSVDLKLK                  |     | K | I | 95.00% | 64  |                                  | 506.8260  | 2 | 3.1  | 451  | 459  | Yes |
| LVIANALTEDEGDYVFAPDAYNV   |     |   |   |        |     |                                  |           |   |      |      |      |     |
| TLPK                      |     | K | V | 95.00% | 49  |                                  | 1003.8520 | 3 | 10.0 | 513  | 540  | Yes |
| LVIANALTEDEGDYVFAPDAYNV   |     |   |   |        |     |                                  |           |   |      |      |      |     |
| TLPK                      |     | K | V | 95.00% | 55  |                                  | 753.1393  | 4 | 8.0  | 513  | 540  | Yes |
| MFSNQGVTLEIR              |     | R | K | 95.00% | 43  | M1: Oxidation                    | 757.3683  | 2 | 9.5  | 1102 | 1114 | Yes |
| MIEGVAYEVR                |     | K | I | 95.00% | 39  | M1: Oxidation                    | 1182.5940 | 1 | 9.2  | 709  | 718  | Yes |
| MIEGVAYEVR                |     | K | I | 95.00% | 78  | M1: Oxidation                    | 591.7964  | 2 | 1.7  | 709  | 718  | Yes |
| MIEGVAYEVR                |     | K | I | 95.00% | 71  |                                  | 583.7996  | 2 | 2.7  | 709  | 718  | Yes |
| NEAGEAHASIK               |     | K | V | 95.00% | 61  |                                  | 563.7816  | 2 | 5.4  | 628  | 638  | Yes |
| NGEIIIPGPK                |     | K | S | 95.00% | 57  |                                  | 1053.5640 | 1 | 5.0  | 402  | 411  | Yes |
| NGEIIIPGPK                |     | K | S | 95.00% | 58  |                                  | 527.2845  | 2 | 2.8  | 402  | 411  | Yes |
| NGLPVQESDR                |     | K | L | 95.00% | 53  |                                  | 557.7797  | 2 | 2.1  | 492  | 501  | Yes |
| NGLPVQESDR                |     | K | V | 95.00% | 42  |                                  | 678.3714  | 2 | 4.9  | 492  | 503  | Yes |
| NSETDTIIFIR               |     | R | K | 95.00% | 79  |                                  | 654.8476  | 2 | 5.6  | 896  | 906  | Yes |
| NSETDTIIFIR               |     | R | K | 95.00% | 35  |                                  | 436.9025  | 3 | 9.0  | 896  | 906  | Yes |
| PFVPLAVTSPPTLLTVDSVTDTT   |     |   |   |        |     |                                  |           |   |      |      |      |     |
| VTMR                      |     | R | W | 95.00% | 61  | M26: Oxidation                   | 958.8519  | 3 | 7.9  | 736  | 762  | Yes |
| PRPELTWK                  |     | K | K | 95.00% | 32  |                                  | 513.7922  | 2 | 2.6  | 874  | 881  | Yes |
| PSMPSRPFVPLAVTSPPTLLTV    |     |   |   |        |     |                                  |           |   |      |      |      |     |
| SVTDTTVMR                 |     | K | W | 95.00% | 97  | M3: Oxidation,<br>M32: Oxidation | 1182.6250 | 3 | 9.8  | 730  | 762  | Yes |
| PSMPSRPFVPLAVTSPPTLLTV    |     |   |   |        |     |                                  |           |   |      |      |      |     |
| SVTDTTVMR                 |     | K | W | 95.00% | 58  | M3: Oxidation                    | 887.2193  | 4 | 8.5  | 730  | 762  | Yes |
| QNANSQSLFIEKPGGTVK        |     | K | V | 95.00% | 92  |                                  | 1136.6270 | 2 | 7.4  | 75   | 95   | Yes |
| QNANSQSLFIEKPGGTVK        |     | K | V | 95.00% | 77  |                                  | 758.0852  | 3 | 4.3  | 75   | 95   | Yes |
| QQEEEPQVDVWELLK           |     | K | N | 95.00% | 90  |                                  | 935.4717  | 2 | 6.4  | 226  | 240  | Yes |
| QQEEEPQVDVWELLK           |     | K | N | 95.00% | 57  |                                  | 623.9840  | 3 | 6.8  | 226  | 240  | Yes |
| RSGEGQEDAGELDFSGLLK       |     | K | R | 95.00% | 115 |                                  | 1004.4930 | 2 | 7.6  | 202  | 220  | Yes |
| RSGEGQEDAGELDFSGLLK       |     | K | R | 95.00% | 80  |                                  | 669.9971  | 3 | 6.6  | 202  | 220  | Yes |
| RVGEAVNLVIFQGK            |     | R | P | 95.00% | 63  |                                  | 813.9752  | 2 | 5.6  | 859  | 873  | Yes |
| RVGEAVNLVIFQGK            |     | R | P | 95.00% | 42  |                                  | 542.9863  | 3 | 6.0  | 859  | 873  | Yes |
| RVGEAVNLVIFQGKPR          |     | R | P | 95.00% | 50  |                                  | 627.3699  | 3 | 3.6  | 859  | 875  | Yes |
| RVGEAVNLVIFQGKPR          |     | R | P | 95.00% | 33  |                                  | 470.7787  | 4 | 2.3  | 859  | 875  | Yes |
| SGEGQEDAGELDFSGLLK        |     | R | R | 95.00% | 133 |                                  | 926.4421  | 2 | 8.0  | 203  | 220  | Yes |
| SGEGQEDAGELDFSGLLK        |     | R | R | 95.00% | 95  |                                  | 617.9633  | 3 | 6.9  | 203  | 220  | Yes |
| SGEGQEDAGELDFSGLLK        |     | R | R | 95.00% | 81  |                                  | 1004.4940 | 2 | 8.9  | 203  | 221  | Yes |
| SGEGQEDAGELDFSGLLK        |     | R | R | 95.00% | 73  |                                  | 669.9985  | 3 | 8.7  | 203  | 221  | Yes |
| SHSGKYDLQVK               |     | R | V | 95.00% | 37  |                                  | 631.3340  | 2 | 4.8  | 911  | 921  | Yes |
| SMEWFTVIEHYHR             |     | K | T | 95.00% | 78  | M2: Oxidation                    | 875.9104  | 2 | 6.9  | 982  | 994  | Yes |
| SMEWFTVIEHYHR             |     | K | T | 95.00% | 50  | M2: Oxidation                    | 584.2774  | 3 | 9.0  | 982  | 994  | Yes |
| SMEWFTVIEHYHR             |     | K | T | 95.00% | 68  |                                  | 867.9137  | 2 | 7.8  | 982  | 994  | Yes |
| SMEWFTVIEHYHR             |     | K | T | 95.00% | 45  |                                  | 578.9436  | 3 | 5.3  | 982  | 994  | Yes |
| TESYDSSSTLVIAER           |     | R | D | 95.00% | 120 |                                  | 948.4720  | 2 | 6.4  | 600  | 616  | Yes |
| TESYDSSSTLVIAERDDSGVY     |     |   |   |        |     |                                  |           |   |      |      |      |     |
| HINLK                     |     | R | N | 95.00% | 72  |                                  | 1046.5220 | 3 | 7.5  | 600  | 627  | Yes |
| TESYDSSSTLVIAERDDSGVY     |     |   |   |        |     |                                  |           |   |      |      |      |     |
| HINLK                     |     | R | N | 95.00% | 54  |                                  | 785.1423  | 4 | 5.8  | 600  | 627  | Yes |
| TKFTITGLPTDAK             |     | K | I | 95.00% | 81  |                                  | 696.8935  | 2 | 3.6  | 800  | 812  | Yes |
| TKFTITGLPTDAK             |     | K | I | 95.00% | 41  |                                  | 464.9308  | 3 | 1.8  | 800  | 812  | Yes |
| TSATITELVIGNEYFR          |     | R | V | 95.00% | 111 |                                  | 989.0104  | 2 | 8.2  | 995  | 1011 | Yes |
| TSATITELVIGNEYFR          |     | R | V | 95.00% | 94  |                                  | 659.6745  | 3 | 5.6  | 995  | 1011 | Yes |
| VAIVDDPR                  |     | K | Y | 95.00% | 55  |                                  | 442.7470  | 2 | 2.1  | 1092 | 1099 | Yes |
| VDKFBVETASIDIQIDRPGPPQIVK |     | K | I | 95.00% | 51  |                                  | 926.8603  | 3 | 8.8  | 922  | 946  | Yes |
| VDKFBVETASIDIQIDRPGPPQIVK |     | K | I | 95.00% | 89  |                                  | 695.3967  | 4 | 8.1  | 922  | 946  | Yes |
| VGEAVNLVIFQGK             |     | R | P | 95.00% | 91  |                                  | 735.9244  | 2 | 6.0  | 860  | 873  | Yes |
| VGEAVNLVIFQGK             |     | R | P | 95.00% | 29  |                                  | 490.9518  | 3 | 5.1  | 860  | 873  | Yes |
| VGEAVNLVIFQGKPR           |     | R | P | 95.00% | 39  |                                  | 862.5040  | 2 | 8.2  | 860  | 875  | Yes |
| VGEAVNLVIFQGKPR           |     | R | P | 95.00% | 50  |                                  | 575.3367  | 3 | 5.0  | 860  | 875  | Yes |
| VGEAVNLVIFQGKPRPELTWK     |     | R | K | 95.00% | 43  |                                  | 826.8074  | 3 | 7.7  | 860  | 881  | Yes |
| VGEDITFIK                 |     | K | V | 95.00% | 44  |                                  | 1092.6030 | 1 | 7.6  | 96   | 105  | Yes |
| VGEDITFIK                 |     | K | V | 95.00% | 89  |                                  | 546.8023  | 2 | 2.2  | 96   | 105  | Yes |
| VHVIDPPK                  |     | K | I | 95.00% | 34  |                                  | 452.7675  | 2 | 1.6  | 541  | 548  | Yes |
| VHVIDPPKIILDGLDADNTVTVIA  |     |   |   |        |     |                                  |           |   |      |      |      |     |
| GNK                       |     | K | L | 95.00% | 67  |                                  | 943.1994  | 3 | 9.0  | 541  | 567  | Yes |





|     |                          |        |                                                                                    |                         |   |   |        |     |                               |           |   |      |     |     |     |
|-----|--------------------------|--------|------------------------------------------------------------------------------------|-------------------------|---|---|--------|-----|-------------------------------|-----------|---|------|-----|-----|-----|
|     |                          |        |                                                                                    | DAQELYAAGENR            | R | L | 95.00% | 58  |                               | 668.8128  | 2 | 3.4  | 360 | 371 | No  |
|     |                          |        |                                                                                    | DESTNVDMSLAQR           | R | D | 95.00% | 52  | M8: Oxidation                 | 741.3364  | 2 | 7.2  | 347 | 359 | No  |
|     |                          |        |                                                                                    | EMSGDLEEGMLAVVK         | R | C | 95.00% | 98  | M10: Oxidation                | 820.3881  | 2 | 7.5  | 413 | 427 | No  |
|     |                          |        |                                                                                    | GTITDAPGFDFPLR          | R | D | 95.00% | 43  |                               | 680.3517  | 2 | 3.3  | 192 | 204 | No  |
|     |                          |        |                                                                                    | GTITDAPGFDFPLRDAEVL     | R | K | 95.00% | 31  |                               | 1022.0350 | 2 | 5.1  | 192 | 210 | No  |
|     |                          |        |                                                                                    | GTITDAPGFDFPLRDAEVL     | R | K | 95.00% | 32  |                               | 681.6938  | 3 | 7.1  | 192 | 210 | No  |
|     |                          |        |                                                                                    | LLISLSQGNRDESTNVDMSLAQR | R | D | 95.00% | 59  | M18: Oxidation                | 855.1047  | 3 | 7.7  | 337 | 359 | No  |
|     |                          |        |                                                                                    | SETDLLDIR               | R | S | 95.00% | 56  |                               | 531.2792  | 2 | 2.3  | 462 | 470 | No  |
|     |                          |        |                                                                                    | SLYHDISGDTSGDYRK        | K | I | 95.00% | 42  |                               | 605.2848  | 3 | 1.7  | 480 | 495 | No  |
| 489 | IPI00418169; IPI00455315 | ANXA2  | ANNEXIN A2 ISOFORM 1.; ANNEXIN A2.                                                 | TPVLFDIYEIK             | K | E | 95.00% | 62  |                               | 669.3765  | 2 | 7.0  | 272 | 282 | No  |
|     |                          |        |                                                                                    | AEDGSDVIDYELIDQDAR      | R | D | 95.00% | 90  |                               | 954.9540  | 2 | 9.0  | 198 | 214 | No  |
|     |                          |        |                                                                                    | AYTNFDAER               | K | D | 95.00% | 40  |                               | 543.7498  | 2 | 5.7  | 47  | 55  | No  |
|     |                          |        |                                                                                    | AYTNFDAERDALNIETAIK     | K | T | 95.00% | 48  |                               | 719.0334  | 3 | 8.2  | 47  | 65  | No  |
|     |                          |        |                                                                                    | DALNIETAIK              | R | T | 95.00% | 62  |                               | 544.3067  | 2 | 5.1  | 56  | 65  | No  |
|     |                          |        |                                                                                    | DLYDAGVK                | R | R | 95.00% | 43  |                               | 880.4463  | 1 | 5.3  | 215 | 222 | No  |
|     |                          |        |                                                                                    | GVDEVTVINILTNR          | K | S | 95.00% | 93  |                               | 771.9352  | 2 | 8.6  | 68  | 81  | No  |
|     |                          |        |                                                                                    | GVDEVTVINILTNR          | K | S | 95.00% | 72  |                               | 514.9583  | 3 | 6.4  | 68  | 81  | No  |
|     |                          |        |                                                                                    | LSLEGDHDSTPPSAYGSVK     | K | A | 95.00% | 89  |                               | 922.9631  | 2 | 8.2  | 29  | 46  | No  |
|     |                          |        |                                                                                    | QDIAFAYQR               | R | R | 95.00% | 59  |                               | 556.2846  | 2 | 6.9  | 87  | 95  | No  |
|     |                          |        |                                                                                    | RAEDGSDVIDYELIDQDAR     | R | D | 95.00% | 34  |                               | 689.0052  | 3 | 7.7  | 197 | 214 | No  |
|     |                          |        |                                                                                    | SALSGHLETVILGLLK        | K | T | 95.00% | 116 |                               | 826.0004  | 2 | 8.1  | 107 | 122 | No  |
|     |                          |        |                                                                                    | SALSGHLETVILGLLK        | K | T | 95.00% | 72  |                               | 551.0028  | 3 | 7.8  | 107 | 122 | No  |
|     |                          |        |                                                                                    | SLYYYIQQDTK             | K | G | 95.00% | 62  |                               | 711.3544  | 2 | 4.0  | 332 | 342 | No  |
|     |                          |        |                                                                                    | SLYYYIQQDTKGDYQK        | K | A | 95.00% | 49  |                               | 671.6643  | 3 | 8.2  | 332 | 347 | No  |
|     |                          |        |                                                                                    | SYSPTYDMLIESIR          | K | K | 95.00% | 41  | M7: Oxidation                 | 738.8450  | 2 | 9.6  | 252 | 263 | No  |
|     |                          |        |                                                                                    | SYSPTYDMLIESIRK         | K | E | 95.00% | 58  | M7: Oxidation                 | 802.8917  | 2 | 7.8  | 252 | 264 | No  |
|     |                          |        |                                                                                    | TDLEKDIISDTSQDFRK       | K | L | 95.00% | 87  |                               | 647.3305  | 3 | 7.4  | 171 | 187 | No  |
|     |                          |        |                                                                                    | TKGVDEVTVINILTNR        | K | S | 95.00% | 79  |                               | 886.5068  | 2 | 7.8  | 66  | 81  | No  |
|     |                          |        |                                                                                    | TKGVDEVTVINILTNR        | K | S | 95.00% | 34  |                               | 591.3415  | 3 | 9.5  | 66  | 81  | No  |
|     |                          |        |                                                                                    | TNQELQEINR              | R | V | 95.00% | 69  |                               | 622.8201  | 2 | 7.1  | 154 | 163 | No  |
|     |                          |        |                                                                                    | TPAQYDASELK             | K | A | 95.00% | 50  |                               | 611.8047  | 2 | 4.8  | 123 | 133 | No  |
| 490 | IPI00418217; IPI00797844 | ANKRD2 | ISOFORM 1 OF ANKYRIN REPEAT DOMAIN-CONTAINING PROTEIN 2.; ANKYRIN REPEAT DOMAIN 2. | ASLEGHMEILEK            | R | L | 95.00% | 72  | M7: Oxidation                 | 686.8435  | 2 | 0.6  | 161 | 172 | No  |
|     |                          |        |                                                                                    | DALAASHEPPPEEITGPVDEE   |   |   |        |     |                               |           |   |      |     |     |     |
|     |                          |        |                                                                                    | TFLK                    | R | A | 95.00% | 91  |                               | 973.4774  | 3 | 7.4  | 101 | 127 | No  |
|     |                          |        |                                                                                    | DKLLSTPLHVAVR           | R | T | 95.00% | 59  |                               | 483.6262  | 3 | 2.9  | 217 | 229 | No  |
|     |                          |        |                                                                                    | DREGDTALHDAVR           | R | L | 95.00% | 37  |                               | 727.8603  | 2 | 9.5  | 250 | 262 | No  |
|     |                          |        |                                                                                    | DREGDTALHDAVR           | R | L | 95.00% | 46  |                               | 485.5743  | 3 | 5.8  | 250 | 262 | No  |
|     |                          |        |                                                                                    | EIIDVGGIQNLIELR         | R | K | 95.00% | 132 |                               | 841.4846  | 2 | 7.3  | 78  | 92  | No  |
|     |                          |        |                                                                                    | LLDNGATVDFQDR           | K | L | 95.00% | 102 |                               | 732.3643  | 2 | 5.1  | 173 | 185 | No  |
|     |                          |        |                                                                                    | LLLLHGADMMTK            | K | N | 95.00% | 52  | M9: Oxidation, M10: Oxidation | 687.8617  | 2 | 2.0  | 271 | 282 | No  |
|     |                          |        |                                                                                    | LLQSHGADTNVR            | K | D | 95.00% | 63  |                               | 655.8513  | 2 | 10.0 | 232 | 243 | No  |
|     |                          |        |                                                                                    | LLQSHGADTNVR            | K | D | 95.00% | 44  |                               | 437.5674  | 3 | 3.8  | 232 | 243 | No  |
|     |                          |        |                                                                                    | LLSTPLHVAVR             | K | T | 95.00% | 86  |                               | 603.3743  | 2 | 3.1  | 219 | 229 | No  |
|     |                          |        |                                                                                    | LLSTPLHVAVR             | K | T | 95.00% | 35  |                               | 402.5850  | 3 | 1.8  | 219 | 229 | No  |
|     |                          |        |                                                                                    | QKLPMDLLVLEDEKHHGAQSAA  |   |   |        |     |                               |           |   |      |     |     |     |
|     |                          |        |                                                                                    | LQK                     | R | V | 95.00% | 37  | M5: Oxidation                 | 939.1713  | 3 | 7.3  | 37  | 61  | No  |
|     |                          |        |                                                                                    | QKLPMDLLVLEDEKHHGAQSAA  |   |   |        |     |                               |           |   |      |     |     |     |
|     |                          |        |                                                                                    | LQK                     | R | V | 95.00% | 28  | M5: Oxidation                 | 704.6288  | 4 | 5.0  | 37  | 61  | No  |
|     |                          |        |                                                                                    | TGQVEIVEHFLSLGLEINAR    | R | D | 95.00% | 60  |                               | 742.4081  | 3 | 7.1  | 230 | 249 | No  |
|     |                          |        |                                                                                    | TPTDLVQLWQADTR          | K | H | 95.00% | 108 |                               | 822.4286  | 2 | 5.9  | 288 | 301 | No  |
| 491 | IPI00418471; IPI00827679 | VIM    | VIMENTIN.; 50 KDA PROTEIN.                                                         | DGQVINETSQHHDDLE        | R | - | 95.00% | 42  |                               | 918.9066  | 2 | 2.9  | 451 | 466 | No  |
|     |                          |        |                                                                                    | EEAENTLQSF              | R | Q | 95.00% | 69  |                               | 662.3158  | 2 | 4.3  | 197 | 207 | No  |
|     |                          |        |                                                                                    | EMEENFAVEAANYQDTIGR     | R | L | 95.00% | 132 | M2: Oxidation                 | 1101.9940 | 2 | 8.6  | 346 | 364 | No  |
|     |                          |        |                                                                                    | EMEENFAVEAANYQDTIGR     | R | L | 95.00% | 44  | M2: Oxidation                 | 734.9961  | 3 | 5.1  | 346 | 364 | No  |
|     |                          |        |                                                                                    | ETNLDSLPLVDTHSK         | R | R | 95.00% | 67  |                               | 834.9296  | 2 | 4.1  | 425 | 439 | No  |
|     |                          |        |                                                                                    | EYQDLLNVK               | R | M | 95.00% | 49  |                               | 1121.5950 | 1 | 9.6  | 382 | 390 | Yes |
|     |                          |        |                                                                                    | EYQDLLNVK               | R | M | 95.00% | 65  |                               | 561.2985  | 2 | 4.1  | 382 | 390 | Yes |
|     |                          |        |                                                                                    | ILLAELEQLK              | K | G | 95.00% | 79  |                               | 585.3639  | 2 | 4.5  | 130 | 139 | No  |
|     |                          |        |                                                                                    | ILLAELEQLKGGQK          | K | S | 95.00% | 88  |                               | 770.4626  | 2 | 4.0  | 130 | 143 | No  |
|     |                          |        |                                                                                    | ILLAELEQLKGGQK          | K | S | 95.00% | 24  |                               | 513.9778  | 3 | 4.3  | 130 | 143 | No  |
|     |                          |        |                                                                                    | ISLPLPNFSSLNLR          | R | E | 95.00% | 51  |                               | 785.9565  | 2 | 6.0  | 411 | 424 | No  |
|     |                          |        |                                                                                    | KVESLQEEIAFLK           | R | K | 95.00% | 75  |                               | 767.4371  | 2 | 8.8  | 223 | 235 | No  |
|     |                          |        |                                                                                    | KVESLQEEIAFLK           | R | K | 95.00% | 63  |                               | 511.9593  | 3 | 6.1  | 223 | 235 | No  |
|     |                          |        |                                                                                    | KVESLQEEIAFLK           | R | L | 95.00% | 46  |                               | 554.6570  | 3 | 4.6  | 223 | 236 | No  |
|     |                          |        |                                                                                    | LGDIYEEEMR              | R | E | 95.00% | 37  | M9: Oxidation                 | 635.7874  | 2 | 3.4  | 146 | 155 | No  |

|     |                                                                                                                                                                                                                                                       |                            |                                                                                                                                                                                                                                                                                                                                                                                                                         |                      |   |   |        |     |                              |           |   |     |     |     |     |  |  |  |
|-----|-------------------------------------------------------------------------------------------------------------------------------------------------------------------------------------------------------------------------------------------------------|----------------------------|-------------------------------------------------------------------------------------------------------------------------------------------------------------------------------------------------------------------------------------------------------------------------------------------------------------------------------------------------------------------------------------------------------------------------|----------------------|---|---|--------|-----|------------------------------|-----------|---|-----|-----|-----|-----|--|--|--|
|     |                                                                                                                                                                                                                                                       |                            |                                                                                                                                                                                                                                                                                                                                                                                                                         | LDQEIQNMKEEMAR       | R | H | 95.00% | 43  | M8: Oxidation,               |           |   |     |     |     |     |  |  |  |
|     |                                                                                                                                                                                                                                                       |                            |                                                                                                                                                                                                                                                                                                                                                                                                                         | LOEEMLQREEAENTLQSF   | K | Q | 95.00% | 43  | M12: Oxidation               | 883.9133  | 2 | 7.5 | 365 | 378 | No  |  |  |  |
|     |                                                                                                                                                                                                                                                       |                            |                                                                                                                                                                                                                                                                                                                                                                                                                         | MALDJEIATYR          | K | K | 95.00% | 58  | M5: Oxidation                | 789.7176  | 3 | 5.2 | 189 | 207 | No  |  |  |  |
|     |                                                                                                                                                                                                                                                       |                            |                                                                                                                                                                                                                                                                                                                                                                                                                         | MFGGPGTASRPSSSR      | R | S | 95.00% | 38  | M1: Oxidation                | 656.3386  | 2 | 5.7 | 391 | 401 | No  |  |  |  |
|     |                                                                                                                                                                                                                                                       |                            |                                                                                                                                                                                                                                                                                                                                                                                                                         | NLQEAEEWYK           | K | S | 95.00% | 46  | M1: Oxidation                | 504.2428  | 3 | 3.6 | 14  | 28  | No  |  |  |  |
|     |                                                                                                                                                                                                                                                       |                            |                                                                                                                                                                                                                                                                                                                                                                                                                         | SLYASSPGGVYATR       | R | S | 95.00% | 93  |                              | 655.3090  | 2 | 2.8 | 283 | 292 | No  |  |  |  |
|     |                                                                                                                                                                                                                                                       |                            |                                                                                                                                                                                                                                                                                                                                                                                                                         | TNEKVELQELNDR        | R | F | 95.00% | 84  |                              | 714.8626  | 2 | 3.6 | 51  | 64  | No  |  |  |  |
|     |                                                                                                                                                                                                                                                       |                            |                                                                                                                                                                                                                                                                                                                                                                                                                         | TNEKVELQELNDR        | R | F | 95.00% | 50  |                              | 794.4053  | 2 | 3.0 | 101 | 113 | Yes |  |  |  |
|     |                                                                                                                                                                                                                                                       |                            |                                                                                                                                                                                                                                                                                                                                                                                                                         | TYSLGSALRPSTSR       | R | S | 95.00% | 36  |                              | 529.9399  | 3 | 3.9 | 101 | 113 | Yes |  |  |  |
|     |                                                                                                                                                                                                                                                       |                            |                                                                                                                                                                                                                                                                                                                                                                                                                         | VELQELNDR            | K | F | 95.00% | 43  |                              | 748.3995  | 2 | 2.8 | 37  | 50  | No  |  |  |  |
|     |                                                                                                                                                                                                                                                       |                            |                                                                                                                                                                                                                                                                                                                                                                                                                         | VEVERDNLAEDIMR       | R | L | 95.00% | 34  | M13: Oxidation               | 558.2911  | 2 | 4.2 | 105 | 113 | Yes |  |  |  |
|     |                                                                                                                                                                                                                                                       |                            |                                                                                                                                                                                                                                                                                                                                                                                                                         | VEVERDNLAEDIMR       | R | L | 95.00% | 54  | M13: Oxidation               | 852.9219  | 2 | 7.8 | 171 | 184 | No  |  |  |  |
| 492 | IPI00419273; IPI00549919                                                                                                                                                                                                                              | CUL4A                      | ISOFORM 1 OF CULLIN-4A.; ISOFORM 2 OF CULLIN-4A.                                                                                                                                                                                                                                                                                                                                                                        | ETVEEQVSTTER         | K | V | 95.00% | 30  |                              | 568.9468  | 3 | 1.1 | 171 | 184 | No  |  |  |  |
|     |                                                                                                                                                                                                                                                       |                            |                                                                                                                                                                                                                                                                                                                                                                                                                         | RPNKPAELIAK          | K | H | 95.00% | 28  |                              | 704.3410  | 2 | 9.8 | 576 | 587 | No  |  |  |  |
|     |                                                                                                                                                                                                                                                       |                            |                                                                                                                                                                                                                                                                                                                                                                                                                         |                      |   |   |        |     |                              | 412.9213  | 3 | 4.1 | 301 | 311 | No  |  |  |  |
| 493 | IPI00419307; IPI00554737                                                                                                                                                                                                                              | PPP2R1A                    | ALPHA ISOFORM OF REGULATORY SUBUNIT A, PROTEIN PHOSPHATASE 2.; SERINE/THREONINE-PROTEIN PHOSPHATASE 2A 65 KDA REGULATORY SUBUNIT AALPHA ISOFORM.                                                                                                                                                                                                                                                                        | AISHEHSPSDLEAHFVPLVK | R | R | 95.00% | 51  |                              |           |   |     |     |     |     |  |  |  |
|     |                                                                                                                                                                                                                                                       |                            |                                                                                                                                                                                                                                                                                                                                                                                                                         | AISHEHSPSDLEAHFVPLVK | R | R | 95.00% | 46  |                              | 738.3858  | 3 | 2.9 | 114 | 133 | No  |  |  |  |
|     |                                                                                                                                                                                                                                                       |                            |                                                                                                                                                                                                                                                                                                                                                                                                                         | DNTIEHLLPLFLAQLK     | K | D | 95.00% | 44  |                              | 554.0421  | 4 | 4.3 | 114 | 133 | No  |  |  |  |
|     |                                                                                                                                                                                                                                                       |                            |                                                                                                                                                                                                                                                                                                                                                                                                                         | IGPILDNSTLQSEVKPILEK | K | L | 95.00% | 105 |                              | 622.3594  | 3 | 4.6 | 359 | 374 | No  |  |  |  |
|     |                                                                                                                                                                                                                                                       |                            |                                                                                                                                                                                                                                                                                                                                                                                                                         | IGPILDNSTLQSEVKPILEK | K | L | 95.00% | 46  |                              | 1097.6290 | 2 | 7.3 | 547 | 566 | No  |  |  |  |
|     |                                                                                                                                                                                                                                                       |                            |                                                                                                                                                                                                                                                                                                                                                                                                                         | KLSTIALALGVER        | K | T | 95.00% | 77  |                              | 732.0881  | 3 | 6.7 | 547 | 566 | No  |  |  |  |
|     |                                                                                                                                                                                                                                                       |                            |                                                                                                                                                                                                                                                                                                                                                                                                                         | LAGGDWFTSR           | R | T | 95.00% | 32  |                              | 685.9261  | 2 | 5.2 | 34  | 46  | No  |  |  |  |
|     |                                                                                                                                                                                                                                                       |                            |                                                                                                                                                                                                                                                                                                                                                                                                                         | LSTIALALGVER         | K | T | 95.00% | 79  |                              | 555.2761  | 2 | 5.7 | 135 | 144 | No  |  |  |  |
|     |                                                                                                                                                                                                                                                       |                            |                                                                                                                                                                                                                                                                                                                                                                                                                         | MAGDPVANVR           | R | F | 95.00% | 63  | M1: Oxidation                | 621.8789  | 2 | 6.2 | 35  | 46  | No  |  |  |  |
|     |                                                                                                                                                                                                                                                       |                            |                                                                                                                                                                                                                                                                                                                                                                                                                         | QLSQSLLPAIVELAEDAK   | R | W | 95.00% | 83  |                              | 523.2618  | 2 | 5.5 | 528 | 537 | No  |  |  |  |
|     |                                                                                                                                                                                                                                                       |                            |                                                                                                                                                                                                                                                                                                                                                                                                                         | QLSQSLLPAIVELAEDAK   | R | W | 95.00% | 79  |                              | 963.0417  | 2 | 8.3 | 399 | 416 | No  |  |  |  |
|     |                                                                                                                                                                                                                                                       |                            |                                                                                                                                                                                                                                                                                                                                                                                                                         | SALASVIMGLSPILGK     | K | D | 95.00% | 73  | M8: Oxidation                | 642.3641  | 3 | 8.8 | 399 | 416 | No  |  |  |  |
|     |                                                                                                                                                                                                                                                       |                            |                                                                                                                                                                                                                                                                                                                                                                                                                         | SALASVIMGLSPILGK     | K | D | 95.00% | 69  | M8: Oxidation                | 786.9602  | 2 | 5.7 | 343 | 358 | No  |  |  |  |
|     |                                                                                                                                                                                                                                                       |                            |                                                                                                                                                                                                                                                                                                                                                                                                                         | SEIIPMFNSNLASDEQDSVR | K | L | 95.00% | 104 | M8: Oxidation                | 524.9755  | 3 | 4.5 | 343 | 358 | No  |  |  |  |
|     |                                                                                                                                                                                                                                                       |                            |                                                                                                                                                                                                                                                                                                                                                                                                                         | SEIIPMFNSNLASDEQDSVR | K | L | 95.00% | 34  | M6: Oxidation                | 1077.5150 | 2 | 9.0 | 203 | 221 | No  |  |  |  |
|     |                                                                                                                                                                                                                                                       |                            |                                                                                                                                                                                                                                                                                                                                                                                                                         | VLAMSGDPNYLHR        | K | M | 95.00% | 58  | M6: Oxidation                | 718.6797  | 3 | 9.9 | 203 | 221 | No  |  |  |  |
|     |                                                                                                                                                                                                                                                       |                            |                                                                                                                                                                                                                                                                                                                                                                                                                         | YMVADKFTLQK          | R | A | 95.00% | 61  | M4: Oxidation                | 744.8686  | 2 | 1.7 | 486 | 498 | No  |  |  |  |
|     |                                                                                                                                                                                                                                                       |                            |                                                                                                                                                                                                                                                                                                                                                                                                                         | YMVADKFTLQK          | R | A | 95.00% | 38  | M2: Oxidation                | 744.8783  | 2 | 5.2 | 261 | 272 | No  |  |  |  |
|     |                                                                                                                                                                                                                                                       |                            |                                                                                                                                                                                                                                                                                                                                                                                                                         |                      | R | A | 95.00% | 38  | M2: Oxidation                | 496.9206  | 3 | 3.5 | 261 | 272 | No  |  |  |  |
| 494 | IPI00419424; IPI00430808; IPI00430820; IPI00430847; IPI00440577; IPI00472961; IPI00478600; IPI00550731; IPI00554675; IPI00746963; IPI00761125; IPI00784070; IPI00784661; IPI00784773; IPI00784865; IPI00784985; IPI00807459; IPI00816118; IPI00827488 | IGKC; IGKV1-5              | IGKV1-5 PROTEIN.; IGKC PROTEIN.; IGKV1-5 PROTEIN.; IGKC PROTEIN.; IGKV2-24 PROTEIN.; IGKC PROTEIN.; IGKV1-5 PROTEIN.; HYPOTHETICAL PROTEIN.; ANTI-RHD MONOCLONAL T125 KAPPA LIGHT CHAIN PRECURSOR.; IGKC PROTEIN.; IGKC PROTEIN.; IGKC PROTEIN.; HYPOTHETICAL PROTEIN.; HYPOTHETICAL PROTEIN.; HYPOTHETICAL PROTEIN.; HYPOTHETICAL PROTEIN.; HYPOTHETICAL PROTEIN.; HYPOTHETICAL PROTEIN.; IGKC PROTEIN.; IGKC PROTEIN. | DSTYLSSTLTLK         | K | A | 95.00% | 66  |                              |           |   |     |     |     |     |  |  |  |
|     |                                                                                                                                                                                                                                                       |                            |                                                                                                                                                                                                                                                                                                                                                                                                                         | FSGSGSDTDLTK         | R | I | 95.00% | 40  |                              | 751.8904  | 2 | 9.3 | 196 | 209 | No  |  |  |  |
|     |                                                                                                                                                                                                                                                       |                            |                                                                                                                                                                                                                                                                                                                                                                                                                         | TVAAPSVFIFPPSDEQLK   | R | S | 95.00% | 68  |                              | 652.3171  | 2 | 7.1 | 87  | 99  | No  |  |  |  |
|     |                                                                                                                                                                                                                                                       |                            |                                                                                                                                                                                                                                                                                                                                                                                                                         | TVAAPSVFIFPPSDEQLK   | R | S | 95.00% | 47  |                              | 973.5273  | 2 | 9.8 | 135 | 152 | No  |  |  |  |
|     |                                                                                                                                                                                                                                                       |                            |                                                                                                                                                                                                                                                                                                                                                                                                                         | VDNALQSGNSQESVTEQDSK | K | D | 95.00% | 139 |                              | 649.3537  | 3 | 9.0 | 135 | 152 | No  |  |  |  |
|     |                                                                                                                                                                                                                                                       |                            |                                                                                                                                                                                                                                                                                                                                                                                                                         | VDNALQSGNSQESVTEQDSK | K | D | 95.00% | 66  |                              | 1068.4920 | 2 | 3.3 | 176 | 195 | No  |  |  |  |
|     |                                                                                                                                                                                                                                                       |                            |                                                                                                                                                                                                                                                                                                                                                                                                                         |                      | K | D | 95.00% | 66  |                              | 712.6664  | 3 | 6.7 | 176 | 195 | No  |  |  |  |
| 495 | IPI00419585                                                                                                                                                                                                                                           | LOC653214; LOC654188; PPIA | PEPTIDYL-PROLYL CIS-TRANS ISOMERASE A.                                                                                                                                                                                                                                                                                                                                                                                  | EGMNIVEAMER          | K | F | 95.00% | 33  | M3: Oxidation, M9: Oxidation |           |   |     |     |     |     |  |  |  |
|     |                                                                                                                                                                                                                                                       |                            |                                                                                                                                                                                                                                                                                                                                                                                                                         | FEDENFILK            | K | H | 95.00% | 56  |                              | 655.7945  | 2 | 6.9 | 134 | 144 | No  |  |  |  |
|     |                                                                                                                                                                                                                                                       |                            |                                                                                                                                                                                                                                                                                                                                                                                                                         | SIYGEKFEDENFILK      | K | H | 95.00% | 99  |                              | 577.7955  | 2 | 8.2 | 83  | 91  | No  |  |  |  |
|     |                                                                                                                                                                                                                                                       |                            |                                                                                                                                                                                                                                                                                                                                                                                                                         | TEWLDDGK             | K | H | 95.00% | 36  |                              | 916.4647  | 2 | 5.3 | 77  | 91  | No  |  |  |  |
|     |                                                                                                                                                                                                                                                       |                            |                                                                                                                                                                                                                                                                                                                                                                                                                         | VKEGMNIVEAMER        | K | F | 95.00% | 53  | M5: Oxidation,               | 424.7141  | 2 | 5.5 | 119 | 125 | No  |  |  |  |
|     |                                                                                                                                                                                                                                                       |                            |                                                                                                                                                                                                                                                                                                                                                                                                                         | VNPTVFFDIAVDGEPLGR   | M | V | 95.00% | 110 | M11: Oxidation               | 769.3780  | 2 | 8.3 | 132 | 144 | No  |  |  |  |
|     |                                                                                                                                                                                                                                                       |                            |                                                                                                                                                                                                                                                                                                                                                                                                                         | VSFELFADK            | R | V | 95.00% | 54  |                              | 973.5143  | 2 | 9.3 | 2   | 19  | No  |  |  |  |
|     |                                                                                                                                                                                                                                                       |                            |                                                                                                                                                                                                                                                                                                                                                                                                                         | VSFELFADKVPK         | R | T | 95.00% | 70  |                              | 528.2795  | 2 | 9.1 | 20  | 28  | No  |  |  |  |
|     |                                                                                                                                                                                                                                                       |                            |                                                                                                                                                                                                                                                                                                                                                                                                                         | VSFELFADKVPK         | R | T | 95.00% | 45  |                              | 690.3884  | 2 | 8.1 | 20  | 31  | No  |  |  |  |
|     |                                                                                                                                                                                                                                                       |                            |                                                                                                                                                                                                                                                                                                                                                                                                                         | AGQEELGPGPAGAPEPGPR  | K | S | 95.00% | 46  |                              | 460.5943  | 3 | 7.0 | 20  | 31  | No  |  |  |  |
| 496 | IPI00420049; IPI00739670                                                                                                                                                                                                                              | C1orf170                   | SIMILAR TO ZK84.1.; SIMILAR TO ZK84.1.                                                                                                                                                                                                                                                                                                                                                                                  | GGGHTGASASQTGSPLPAAS | K | S | 95.00% | 46  |                              | 893.9478  | 2 | 8.3 | 129 | 147 | No  |  |  |  |
|     |                                                                                                                                                                                                                                                       |                            |                                                                                                                                                                                                                                                                                                                                                                                                                         | PETAK                | K | L | 95.00% | 50  |                              |           |   |     |     |     |     |  |  |  |
|     |                                                                                                                                                                                                                                                       |                            |                                                                                                                                                                                                                                                                                                                                                                                                                         | MTESSEGLVSTPVPR      | R | A | 95.00% | 60  | M1: Oxidation                | 807.7407  | 3 | 2.0 | 98  | 124 | No  |  |  |  |
|     |                                                                                                                                                                                                                                                       |                            |                                                                                                                                                                                                                                                                                                                                                                                                                         |                      |   |   |        |     |                              | 738.8742  | 2 | 2.5 | 344 | 357 | No  |  |  |  |

|     |                          |       |                                               |                                     |   |   |        |     |                    |           |   |      |      |      |    |
|-----|--------------------------|-------|-----------------------------------------------|-------------------------------------|---|---|--------|-----|--------------------|-----------|---|------|------|------|----|
|     |                          |       |                                               | SASEGAGPGLPAVVER                    | R | L | 95.00% | 40  |                    | 608.3296  | 3 | 3.9  | 596  | 614  | No |
|     |                          |       |                                               | SASQGAGPGLPAVVER                    | R | L | 95.00% | 33  |                    | 608.0011  | 3 | 2.9  | 596  | 614  | No |
|     |                          |       |                                               | SPVQEDRPGGLSTPVPVTE                 |   |   |        |     |                    |           |   |      |      |      |    |
|     |                          |       |                                               | QGTDOIR                             | R | T | 95.00% | 82  |                    | 1010.8640 | 3 | 8.2  | 148  | 176  | No |
|     |                          |       |                                               | TALLANVGTISAIR                      | K | Y | 95.00% | 90  |                    | 700.4221  | 2 | 6.4  | 664  | 677  | No |
|     |                          |       |                                               | DIHYDROLIPOYLLYSINE-RESIDUE         |   |   |        |     |                    |           |   |      |      |      |    |
|     |                          |       |                                               | SUCCINYLTRANSFERASE COMPONENT OF 2- |   |   |        |     |                    |           |   |      |      |      |    |
|     |                          |       |                                               | OXOGLUTARATE DEHYDROGENASE COMPLEX, |   |   |        |     |                    |           |   |      |      |      |    |
|     |                          |       |                                               | MITOCHONDRIAL PRECURSOR.            |   |   |        |     |                    |           |   |      |      |      |    |
| 497 | IPI00420108              | DLST  |                                               | AKPAEAPAAAAPK                       | K | A | 95.00% | 32  |                    | 596.8439  | 2 | 9.1  | 153  | 165  | No |
|     |                          |       |                                               | ASAFALQEQPVVNAVIDDTTK               | K | E | 95.00% | 163 |                    | 1109.0820 | 2 | 6.8  | 287  | 307  | No |
|     |                          |       |                                               | ASAFALQEQPVVNAVIDDTTK               | K | E | 95.00% | 81  |                    | 739.7230  | 3 | 5.9  | 287  | 307  | No |
|     |                          |       |                                               | ASAFALQEQPVVNAVIDDTTKEV             |   |   |        |     |                    |           |   |      |      |      |    |
|     |                          |       |                                               | VYR                                 | K | D | 95.00% | 72  |                    | 955.1753  | 3 | 9.2  | 287  | 312  | No |
|     |                          |       |                                               | EAVTFLR                             | R | K | 95.00% | 36  |                    | 418.2390  | 2 | 2.8  | 431  | 437  | No |
|     |                          |       |                                               | GLVVPVIR                            | R | N | 95.00% | 55  |                    | 426.7892  | 2 | 3.9  | 326  | 333  | No |
|     |                          |       |                                               | LGFMSAFVK                           | K | A | 95.00% | 55  | M4: Oxidation      | 508.2704  | 2 | 4.0  | 278  | 286  | No |
|     |                          |       |                                               | NVEAMNFADIER                        | R | T | 95.00% | 105 | M5: Oxidation      | 712.8309  | 2 | 4.3  | 334  | 345  | No |
|     |                          |       |                                               | TPAFAESVTEGDVR                      | K | W | 95.00% | 124 |                    | 739.8636  | 2 | 4.5  | 75   | 88   | No |
|     |                          |       |                                               | TPAFAESVTEGDVRWEK                   | K | A | 95.00% | 72  |                    | 961.4774  | 2 | 9.0  | 75   | 91   | No |
|     |                          |       |                                               | VEGGTFLFLR                          | K | K | 95.00% | 80  |                    | 595.3353  | 2 | 3.8  | 134  | 144  | No |
|     |                          |       |                                               | VEVRPMMYVALTYDHR                    | K | L | 95.00% | 51  | M6: Oxidation, M7: | 671.3323  | 3 | 3.9  | 410  | 425  | No |
|     |                          |       |                                               | VLLLDL                              | R | - | 95.00% | 30  | Oxidation          | 685.4566  | 1 | 9.4  | 448  | 453  | No |
| 498 | IPI00427330              | SBDS  | SHWACHMAN-BODIAN-DIAMOND SYNDROME<br>PROTEIN. | DVEEGDEKFE                          | K | - | 95.00% | 29  |                    | 598.7536  | 2 | 2.8  | 241  | 250  | No |
|     |                          |       |                                               | GSLEVLNLK                           | K | D | 95.00% | 37  |                    | 486.7938  | 2 | 7.0  | 232  | 240  | No |
|     |                          |       |                                               | RPYTVILIER                          | K | A | 95.00% | 35  |                    | 420.5898  | 3 | 4.8  | 126  | 135  | No |
|     |                          |       |                                               | AASAYDYGSSHGLTDSLLDD                |   |   |        |     |                    |           |   |      |      |      |    |
|     |                          |       |                                               | YSSK                                | K | L | 95.00% | 56  |                    | 908.4221  | 3 | 6.6  | 86   | 111  | No |
| 499 | IPI00434580; IPI00479390 | MYOM1 | MYOMESIN 1.; MYOM1 PROTEIN.                   | AINQAGVGKPSDLAGPVVAETR              | R | P | 95.00% | 40  |                    | 717.3955  | 3 | 6.4  | 1117 | 1138 | No |
|     |                          |       |                                               | AINQAGVGKPSDLAGPVVAETR              |   |   |        |     |                    |           |   |      |      |      |    |
|     |                          |       |                                               | PGTK                                | R | E | 95.00% | 78  |                    | 845.1361  | 3 | 7.3  | 1117 | 1142 | No |
|     |                          |       |                                               | AINQAGVGKPSDLAGPVVAETR              |   |   |        |     |                    |           |   |      |      |      |    |
|     |                          |       |                                               | PGTK                                | R | E | 95.00% | 39  |                    | 634.1028  | 4 | 5.4  | 1021 | 1046 | No |
|     |                          |       |                                               | ASASSQQQASQHALSSEVSR                | R | K | 95.00% | 88  |                    | 716.0110  | 3 | 2.5  | 64   | 84   | No |
|     |                          |       |                                               | ATLTFSHLNKEDEGLYTIR                 | R | V | 95.00% | 50  |                    | 736.7211  | 3 | 8.0  | 465  | 483  | No |
|     |                          |       |                                               | ATLTFSHLNKEDEGLYTIR                 | R | V | 95.00% | 31  |                    | 552.7913  | 4 | 5.3  | 465  | 483  | No |
|     |                          |       |                                               | ATNHSTVVLVGDVFK                     | K | K | 95.00% | 78  |                    | 793.9356  | 2 | 5.7  | 1325 | 1339 | No |
|     |                          |       |                                               | ATNHSTVVLVGDVFKK                    | K | L | 95.00% | 50  |                    | 572.3251  | 3 | 6.1  | 1325 | 1340 | No |
|     |                          |       |                                               | ATNHSTVVLVGDVFKK                    | K | L | 95.00% | 35  |                    | 429.4947  | 4 | 3.5  | 1325 | 1340 | No |
|     |                          |       |                                               | AVNAAGLSEYSQDSEAEVK                 | R | A | 95.00% | 127 |                    | 1041.0110 | 2 | 4.5  | 813  | 832  | No |
|     |                          |       |                                               | DADAEIEGAPAAPLDVK                   | R | C | 95.00% | 110 |                    | 841.4256  | 2 | 8.7  | 501  | 517  | No |
|     |                          |       |                                               | DAGIYEVILK                          | K | D | 95.00% | 29  |                    | 560.8220  | 2 | 9.4  | 1422 | 1431 | No |
|     |                          |       |                                               | DAGIYEVILKDDR                       | K | G | 95.00% | 64  |                    | 753.9015  | 2 | 9.6  | 1422 | 1434 | No |
|     |                          |       |                                               | DSLVLQWKPPVHSGR                     | K | T | 95.00% | 46  |                    | 573.6482  | 3 | -3.2 | 1053 | 1067 | No |
|     |                          |       |                                               | DSMVLGWK                            | R | Q | 95.00% | 46  | M3: Oxidation      | 476.2374  | 2 | 6.2  | 948  | 955  | No |
|     |                          |       |                                               | DYVSTEDSPR                          | K | L | 95.00% | 57  |                    | 584.7632  | 2 | 5.3  | 1174 | 1183 | No |
|     |                          |       |                                               | EGVSYVFR                            | K | V | 95.00% | 36  |                    | 478.7477  | 2 | 3.7  | 1107 | 1114 | No |
|     |                          |       |                                               | ENLPSDYMVPIFSGR                     | K | Q | 95.00% | 58  | M8: Oxidation      | 870.9245  | 2 | 8.3  | 130  | 144  | No |
|     |                          |       |                                               | FALFDLAEGK                          | R | S | 95.00% | 55  |                    | 555.8002  | 2 | 8.0  | 697  | 706  | No |
|     |                          |       |                                               | FHAGASTMPLSFGVTPYGYASR              | R | F | 95.00% | 67  | M8: Oxidation      | 778.3798  | 3 | 9.2  | 381  | 402  | No |
|     |                          |       |                                               | FPVTGLIEGR                          | R | S | 95.00% | 61  |                    | 544.8122  | 2 | 5.5  | 569  | 578  | No |
|     |                          |       |                                               | HFQPEIQWYR                          | K | N | 95.00% | 43  |                    | 702.3506  | 2 | 5.2  | 436  | 445  | No |
|     |                          |       |                                               | HFQPEIQWYR                          | K | N | 95.00% | 39  |                    | 468.5696  | 3 | 5.0  | 436  | 445  | No |
|     |                          |       |                                               | HVSGITDTEER                         | K | I | 95.00% | 45  |                    | 686.8254  | 2 | 6.1  | 147  | 158  | No |
|     |                          |       |                                               | IALSATDLK                           | K | I | 95.00% | 47  |                    | 466.2786  | 2 | 3.1  | 1363 | 1371 | No |
|     |                          |       |                                               | IGGAEITGYVNYR                       | K | E | 95.00% | 97  |                    | 788.3986  | 2 | 5.5  | 864  | 877  | No |
|     |                          |       |                                               | IKAAAYIAQR                          | R | N | 95.00% | 60  |                    | 617.3537  | 2 | 3.2  | 159  | 169  | No |
|     |                          |       |                                               | IQSTAEGIQLYSFVTTYVEDLK              | K | V | 95.00% | 95  |                    | 856.4424  | 3 | 7.5  | 1468 | 1489 | No |
|     |                          |       |                                               | KAASAYDYGSSHGLTDSLLDD               |   |   |        |     |                    |           |   |      |      |      |    |
|     |                          |       |                                               | DYSSK                               | R | L | 95.00% | 79  |                    | 951.1208  | 3 | 6.7  | 85   | 111  | No |
|     |                          |       |                                               | KDSLVLQWKPPVHSGR                    | R | T | 95.00% | 35  |                    | 462.5128  | 4 | -0.9 | 1052 | 1067 | No |
|     |                          |       |                                               | LLALSHEHKFPTVPVK                    | R | S | 95.00% | 35  |                    | 908.5330  | 2 | 5.2  | 1232 | 1247 | No |
|     |                          |       |                                               | LLALSHEHKFPTVPVK                    | R | S | 95.00% | 41  |                    | 606.0255  | 3 | 6.7  | 1232 | 1247 | No |
|     |                          |       |                                               | LNEDHLLHAPEFIKPR                    | K | S | 95.00% | 64  |                    | 681.3805  | 3 | 3.3  | 268  | 284  | No |
|     |                          |       |                                               | LNEDHLLHAPEFIKPR                    | K | S | 95.00% | 36  |                    | 511.2895  | 4 | 7.7  | 268  | 284  | No |
|     |                          |       |                                               | LQDEDEGTYTFQLQDGK                   | K | A | 95.00% | 135 |                    | 993.9574  | 2 | 6.8  | 1308 | 1324 | No |

500 IPI00440493

ATP5A1

ATP SYNTHASE SUBUNIT ALPHA,  
MITOCHONDRIAL PRECURSOR.

|                          |   |   |        |     |                                 |           |   |      |      |      |    |
|--------------------------|---|---|--------|-----|---------------------------------|-----------|---|------|------|------|----|
| MAALESK                  | R | G | 95.00% | 31  | M1: Oxidation                   | 439.7385  | 2 | 3.8  | 1672 | 1679 | No |
| NLLASEEGITPK             | R | Q | 95.00% | 82  |                                 | 686.8741  | 2 | 5.7  | 170  | 182  | No |
| NLLASEEGITTSK            | R | Q | 95.00% | 96  |                                 | 681.8627  | 2 | 4.2  | 170  | 182  | No |
| NQVPINVHANPGK            | K | Y | 95.00% | 50  |                                 | 694.3802  | 2 | 5.7  | 313  | 325  | No |
| NTDTSVVVSWEEK            | R | D | 95.00% | 66  |                                 | 790.8797  | 2 | 4.5  | 750  | 763  | No |
| NTGIEMFMEK               | R | L | 95.00% | 44  | M7: Oxidation, M9:<br>Oxidation | 672.8164  | 2 | 5.2  | 1297 | 1307 | No |
| QATSALQQEETSEK           | K | K | 95.00% | 106 |                                 | 775.3740  | 2 | 3.5  | 225  | 238  | No |
| QATSALQQEETSEKK          | K | S | 95.00% | 76  |                                 | 839.4243  | 2 | 6.5  | 225  | 239  | No |
| QPAVDGGSPILGYFIDK        | K | C | 95.00% | 61  |                                 | 888.9672  | 2 | 5.2  | 532  | 548  | No |
| RASASSSQQASQHALSSEVSR    | R | K | 95.00% | 36  | S3: Phospho                     | 794.7039  | 3 | 7.1  | 63   | 84   | No |
| SAVYTGSTAYSSR            | R | S | 95.00% | 88  |                                 | 739.3531  | 2 | 4.4  | 36   | 49   | No |
| SELAVEILEK               | K | G | 95.00% | 78  |                                 | 565.8217  | 2 | 4.1  | 1152 | 1161 | No |
| SYVLSWKPQGQR             | R | G | 95.00% | 43  |                                 | 506.2845  | 3 | 6.7  | 652  | 664  | No |
| TAYFTINGVSTADSGK         | R | Y | 95.00% | 94  |                                 | 816.4071  | 2 | 9.0  | 1628 | 1643 | No |
| TGVTGEQIWLQINEPTPNKDGK   | K | Y | 95.00% | 32  |                                 | 809.0884  | 3 | 5.4  | 1507 | 1528 | No |
| TLEETETYHAK              | K | L | 95.00% | 36  |                                 | 661.3206  | 2 | 4.2  | 257  | 267  | No |
| TPVTGYFVDLK              | R | E | 95.00% | 80  |                                 | 620.3409  | 2 | 9.2  | 1068 | 1078 | No |
| VLGGLPDVVTIQEGK          | R | A | 95.00% | 84  |                                 | 762.9396  | 2 | 4.8  | 1574 | 1588 | No |
| VNTELPVK                 | R | S | 95.00% | 30  |                                 | 450.2653  | 2 | 2.9  | 686  | 693  | No |
| VNYIFNEK                 | K | E | 95.00% | 34  |                                 | 513.7688  | 2 | 3.7  | 1179 | 1186 | No |
| YSEPVAAALDPAEK           | R | A | 95.00% | 81  |                                 | 663.3557  | 2 | 6.3  | 598  | 610  | No |
| VVITPEIK                 | R | H | 95.00% | 27  |                                 | 898.5642  | 1 | 3.1  | 428  | 435  | No |
| VVITPEIK                 | R | H | 95.00% | 32  |                                 | 449.7855  | 2 | 1.8  | 428  | 435  | No |
| VVQTLWSEGER              | K | A | 95.00% | 32  |                                 | 631.3206  | 2 | 0.3  | 455  | 464  | No |
| YVMELFDGK                | K | T | 95.00% | 55  | M3: Oxidation                   | 559.2689  | 2 | 5.4  | 1529 | 1537 | No |
| APGIIPR                  | K | I | 95.00% | 27  |                                 | 723.4533  | 1 | 2.0  | 176  | 182  | No |
| AVDSLPIGR                | K | G | 95.00% | 54  |                                 | 1026.6020 | 1 | 6.5  | 195  | 204  | No |
| AVDSLPIGR                | K | G | 95.00% | 82  |                                 | 513.8012  | 2 | -0.4 | 195  | 204  | No |
| EAYPGDVLYLHSR            | R | L | 95.00% | 90  |                                 | 777.3746  | 2 | 1.7  | 335  | 347  | No |
| EAYPGDVLYLHSR            | R | L | 95.00% | 49  |                                 | 518.5857  | 3 | 1.8  | 335  | 347  | No |
| EIVTNFLAGFEA             | K | - | 95.00% | 97  |                                 | 655.8392  | 2 | 5.6  | 542  | 553  | No |
| ELIIGDR                  | R | Q | 95.00% | 35  |                                 | 815.4664  | 1 | 4.4  | 208  | 214  | No |
| ELIIGDR                  | R | Q | 95.00% | 37  |                                 | 408.2357  | 2 | 1.0  | 208  | 214  | No |
| EPMQTGIK                 | R | A | 95.00% | 44  | M3: Oxidation                   | 460.2358  | 2 | 8.4  | 187  | 194  | No |
| EVAFAQFGSDLDAATQQLLSR    | R | G | 95.00% | 160 |                                 | 1169.5990 | 2 | 9.7  | 442  | 463  | No |
| EVAFAQFGSDLDAATQQLLSR    | R | G | 95.00% | 100 |                                 | 780.0657  | 3 | 5.8  | 442  | 463  | No |
| FENAFLSHVVSQHQALLGTIR    | K | A | 95.00% | 127 |                                 | 1184.1430 | 2 | 8.7  | 507  | 527  | No |
| FENAFLSHVVSQHQALLGTIR    | K | A | 95.00% | 81  |                                 | 789.7629  | 3 | 6.8  | 507  | 527  | No |
| FENAFLSHVVSQHQALLGTIR    | K | A | 95.00% | 53  |                                 | 592.5723  | 4 | 3.7  | 507  | 527  | No |
| FNDGSDEK                 | R | K | 95.00% | 31  |                                 | 456.1934  | 2 | 4.8  | 232  | 239  | No |
| GIRPAINVGLSVSR           | K | V | 95.00% | 74  |                                 | 719.9337  | 2 | 7.0  | 403  | 416  | No |
| GIRPAINVGLSVSR           | K | V | 95.00% | 65  |                                 | 480.2902  | 3 | 3.9  | 403  | 416  | No |
| GMSLNLEPDNVGVVFGNDK      | K | L | 95.00% | 135 | M2: Oxidation                   | 1060.5300 | 2 | 8.8  | 104  | 123  | No |
| GMSLNLEPDNVGVVFGNDK      | K | L | 95.00% | 74  | M2: Oxidation                   | 707.3543  | 3 | 6.7  | 104  | 123  | No |
| GYLDKLEPSK               | R | I | 95.00% | 47  |                                 | 1149.6210 | 1 | 4.8  | 494  | 503  | No |
| GYLDKLEPSK               | R | I | 95.00% | 60  |                                 | 575.3137  | 2 | 3.3  | 494  | 503  | No |
| HALIYDDLK                | K | Q | 95.00% | 103 |                                 | 644.3523  | 2 | 1.3  | 306  | 316  | No |
| ILGADTSVDLEETGR          | R | V | 95.00% | 156 |                                 | 788.3987  | 2 | 1.6  | 59   | 73   | No |
| ISEQSDAK                 | K | L | 95.00% | 46  |                                 | 439.2195  | 2 | 5.1  | 532  | 539  | No |
| ISVREPMQTGIK             | R | A | 95.00% | 34  | M7: Oxidation                   | 687.8760  | 2 | 1.9  | 183  | 194  | No |
| ISVREPMQTGIK             | R | A | 95.00% | 45  |                                 | 679.8796  | 2 | 3.3  | 183  | 194  | No |
| ITKFENAFLSHVVSQHQALLGTIR | K | A | 95.00% | 91  |                                 | 903.8414  | 3 | 9.3  | 504  | 527  | No |
| ITKFENAFLSHVVSQHQALLGTIR | K | A | 95.00% | 52  |                                 | 678.1311  | 4 | 6.5  | 504  | 527  | No |
| ITKFENAFLSHVVSQHQALLGTIR | K | A | 95.00% | 32  |                                 | 542.7051  | 5 | 4.0  | 504  | 527  | No |
| LELAQYR                  | K | E | 95.00% | 50  |                                 | 446.7505  | 2 | 4.3  | 435  | 441  | No |
| LKEIVTNFLAGFEA           | K | - | 95.00% | 94  |                                 | 776.4277  | 2 | 3.3  | 540  | 553  | No |
| LKEIVTNFLAGFEA           | K | - | 95.00% | 41  |                                 | 517.9572  | 3 | 8.8  | 540  | 553  | No |
| LTDADAMK                 | R | Y | 95.00% | 36  | M7: Oxidation                   | 440.7113  | 2 | 6.7  | 263  | 270  | No |
| LTELLK                   | R | Q | 95.00% | 32  |                                 | 716.4581  | 1 | 3.0  | 467  | 472  | No |
| NVQAEEMVEFSSGLK          | R | G | 95.00% | 123 | M7: Oxidation                   | 842.4047  | 2 | 6.9  | 89   | 103  | No |
| NVQAEEMVEFSSGLK          | R | G | 95.00% | 75  |                                 | 834.4069  | 2 | 6.4  | 89   | 103  | No |

|     |                                       |       |                                                                                            |   |   |        |     |                                 |           |   |      |     |     |    |
|-----|---------------------------------------|-------|--------------------------------------------------------------------------------------------|---|---|--------|-----|---------------------------------|-----------|---|------|-----|-----|----|
|     |                                       |       | PAINVGLSVSR                                                                                | R | V | 95.00% | 79  |                                 | 556.8278  | 2 | 4.5  | 406 | 416 | No |
|     |                                       |       | QGOYSPMAIEEQVAVIYAGVR                                                                      | K | G | 95.00% | 118 | M7: Oxidation                   | 1163.0900 | 2 | 7.1  | 473 | 493 | No |
|     |                                       |       | QGOYSPMAIEEQVAVIYAGVR                                                                      | K | G | 95.00% | 91  | M7: Oxidation                   | 775.7278  | 3 | 5.6  | 473 | 493 | No |
|     |                                       |       | QGOYSPMAIEEQVAVIYAGVR                                                                      | K | G | 95.00% | 32  |                                 | 770.3907  | 3 | -1.5 | 473 | 493 | No |
|     |                                       |       | QMSLLLR                                                                                    | R | R | 95.00% | 47  | M2: Oxidation                   | 438.7540  | 2 | 2.7  | 323 | 329 | No |
|     |                                       |       | RSTVAQLVK                                                                                  | K | R | 95.00% | 40  |                                 | 501.3099  | 2 | 1.2  | 253 | 261 | No |
|     |                                       |       | RTGAIVDVPVGEELLGR                                                                          | K | V | 95.00% | 96  |                                 | 891.0071  | 2 | 7.9  | 133 | 149 | No |
|     |                                       |       | RTGAIVDVPVGEELLGR                                                                          | K | V | 95.00% | 55  |                                 | 594.3388  | 3 | 4.7  | 133 | 149 | No |
|     |                                       |       | STVAQLVK                                                                                   | R | R | 95.00% | 65  |                                 | 423.2594  | 2 | 1.4  | 254 | 261 | No |
|     |                                       |       | TGAIVDVPVGEELLGR                                                                           | R | V | 95.00% | 113 |                                 | 812.9535  | 2 | 4.8  | 134 | 149 | No |
|     |                                       |       | TGAIVDVPVGEELLGR                                                                           | R | V | 95.00% | 86  |                                 | 542.3061  | 3 | 7.0  | 134 | 149 | No |
|     |                                       |       | TGTAEMSSILEER                                                                              | K | I | 95.00% | 100 | M6: Oxidation                   | 720.3404  | 2 | 2.9  | 46  | 58  | No |
|     |                                       |       | TGTAEMSSILEER                                                                              | K | I | 95.00% | 96  |                                 | 712.3450  | 2 | 5.7  | 46  | 58  | No |
|     |                                       |       | TSIAIDTIINQK                                                                               | K | R | 95.00% | 62  |                                 | 1316.7550 | 1 | 9.3  | 219 | 230 | No |
|     |                                       |       | TSIAIDTIINQK                                                                               | K | R | 95.00% | 104 |                                 | 658.8786  | 2 | 5.0  | 219 | 230 | No |
|     |                                       |       | TSIAIDTIINQK                                                                               | K | R | 95.00% | 37  |                                 | 439.5878  | 3 | 3.7  | 219 | 230 | No |
|     |                                       |       | TSIAIDTIINQKR                                                                              | K | F | 95.00% | 80  |                                 | 736.9296  | 2 | 5.1  | 219 | 231 | No |
|     |                                       |       | TSIAIDTIINQKR                                                                              | K | F | 95.00% | 44  |                                 | 491.6219  | 3 | 4.3  | 219 | 231 | No |
|     |                                       |       | VGLKAPGIIPR                                                                                | R | I | 95.00% | 45  |                                 | 560.8666  | 2 | 4.0  | 172 | 182 | No |
|     |                                       |       | VLSIGDGIAR                                                                                 | R | V | 95.00% | 80  |                                 | 500.7931  | 2 | -0.8 | 74  | 83  | No |
|     |                                       |       | VVDALGNAIDGK                                                                               | R | G | 95.00% | 63  |                                 | 1171.6390 | 1 | 5.7  | 150 | 161 | No |
|     |                                       |       | VVDALGNAIDGK                                                                               | R | G | 95.00% | 100 |                                 | 586.3215  | 2 | 2.3  | 150 | 161 | No |
|     |                                       |       | VVDALGNAIDGKPIGSK                                                                          | R | T | 95.00% | 87  |                                 | 855.9807  | 2 | 8.3  | 150 | 167 | No |
|     |                                       |       | ISOFORM 2 OF FUMARYLACETOACETATE<br>HYDROLASE DOMAIN-CONTAINING PROTEIN1.;                 |   |   |        |     |                                 |           |   |      |     |     |    |
|     |                                       |       | ISOFORM 1 OF FUMARYLACETOACETATE<br>HYDROLASE DOMAIN-CONTAINING PROTEIN1.;                 |   |   |        |     |                                 |           |   |      |     |     |    |
|     |                                       |       | FUMARYLACETOACETATE HYDROLASE DOMAIN<br>CONTAINING 1.                                      |   |   |        |     |                                 |           |   |      |     |     |    |
| 501 | IPI00440828; IPI00552360; IPI00604759 | FAHD1 | IITLEEGDIILTGTPK                                                                           | K | G | 95.00% | 28  |                                 | 571.6649  | 3 | 5.7  | 179 | 194 | No |
|     |                                       |       | NLHHELELGVVMGK                                                                             | R | R | 95.00% | 58  | M12: Oxidation                  | 796.4223  | 2 | 6.3  | 67  | 80  | No |
|     |                                       |       | L-XYLULOSE REDUCTASE.; 26 KDA PROTEIN.; 26<br>KDA PROTEIN.                                 |   |   |        |     |                                 |           |   |      |     |     |    |
|     |                                       |       | AVIQVSQIVAR                                                                                | R | G | 95.00% | 41  |                                 | 592.3657  | 2 | 6.1  | 108 | 118 | No |
|     |                                       |       | GTVQALHATGAR                                                                               | R | V | 95.00% | 75  |                                 | 591.3259  | 2 | 4.1  | 20  | 31  | No |
|     |                                       |       | SFEVNLR                                                                                    | R | A | 95.00% | 35  |                                 | 432.7351  | 2 | 5.2  | 103 | 109 | No |
|     |                                       |       | TQADLDSLVR                                                                                 | R | E | 95.00% | 53  |                                 | 559.2988  | 2 | 3.8  | 40  | 49  | No |
|     |                                       |       | TROPONIN I, SLOW SKELETAL MUSCLE.; 22 KDA<br>PROTEIN.                                      |   |   |        |     |                                 |           |   |      |     |     |    |
|     |                                       |       | IPTLQTR                                                                                    | R | G | 95.00% | 31  |                                 | 414.7526  | 2 | 3.5  | 49  | 55  | No |
|     |                                       |       | NVEAMSGMEGR                                                                                | K | K | 95.00% | 57  | M5: Oxidation                   | 598.7614  | 2 | 9.3  | 164 | 174 | No |
|     |                                       |       | NVEAMSGMEGR                                                                                | K | K | 95.00% | 78  | M5: Oxidation                   | 606.7568  | 2 | 5.8  | 164 | 174 | No |
|     |                                       |       | NVEAMSGMEGR                                                                                | K | K | 95.00% | 78  | M5: Oxidation, M8:<br>Oxidation | 606.7568  | 2 | 5.8  | 164 | 174 | No |
|     |                                       |       | NVEAMSGMEGR                                                                                | K | K | 95.00% | 51  | M8: Oxidation                   | 598.7598  | 2 | 6.5  | 164 | 174 | No |
|     |                                       |       | VEVVDEER                                                                                   | K | Y | 95.00% | 32  |                                 | 487.7468  | 2 | 6.5  | 73  | 80  | No |
|     |                                       |       | VEVVDEERYDIEAK                                                                             | K | C | 95.00% | 54  |                                 | 847.4205  | 2 | 2.7  | 73  | 86  | No |
|     |                                       |       | VSADAMLR                                                                                   | R | A | 95.00% | 47  | M6: Oxidation                   | 439.7261  | 2 | 4.3  | 118 | 125 | No |
|     |                                       |       | AAAEELPVGASAGQPQR                                                                          | R | N | 95.00% | 97  |                                 | 810.9262  | 2 | 6.1  | 657 | 673 | No |
|     |                                       |       | ALLDMIIEK                                                                                  | K | A | 95.00% | 32  | M5: Oxidation                   | 539.2824  | 2 | 6.1  | 415 | 423 | No |
|     |                                       |       | EANLLMQNLNK                                                                                | K | L | 95.00% | 50  | M6: Oxidation                   | 652.3427  | 2 | 7.4  | 144 | 154 | No |
|     |                                       |       | EASVHPDISEELNR                                                                             | K | Q | 95.00% | 40  |                                 | 798.3913  | 2 | 5.1  | 48  | 61  | No |
|     |                                       |       | EITSHFQSTLTDIQQIEQQSER                                                                     | K | N | 95.00% | 65  |                                 | 892.4431  | 3 | 8.1  | 245 | 267 | No |
|     |                                       |       | FEEFQSTLTK                                                                                 | R | S | 95.00% | 58  |                                 | 615.3088  | 2 | 3.5  | 367 | 376 | No |
|     |                                       |       | QLEDIINTYGSAASTAGK                                                                         | R | E | 95.00% | 104 |                                 | 919.9653  | 2 | 4.9  | 62  | 79  | No |
|     |                                       |       | SIIDQYELR                                                                                  | K | E | 95.00% | 42  |                                 | 568.8050  | 2 | 6.0  | 284 | 292 | No |
|     |                                       |       | SNEVFATFK                                                                                  | K | Q | 95.00% | 35  |                                 | 521.7657  | 2 | 2.6  | 377 | 385 | No |
|     |                                       |       | YAELLDEHR                                                                                  | K | T | 95.00% | 35  |                                 | 573.2867  | 2 | 5.6  | 169 | 177 | No |
|     |                                       |       | ISOFORM 1 OF UBIQUINONE BIOSYNTHESIS<br>METHYLTRANSFERASE COQ5,MITOCHONDRIAL<br>PRECURSOR. |   |   |        |     |                                 |           |   |      |     |     |    |
|     |                                       |       | EYQNEEDSLGGSR                                                                              | K | V | 95.00% | 77  |                                 | 742.3240  | 2 | 6.7  | 154 | 166 | No |
|     |                                       |       | FLNYVQSQHQQR                                                                               | R | K | 95.00% | 65  |                                 | 710.3654  | 2 | 6.8  | 124 | 134 | No |
|     |                                       |       | FLNYVQSQHQQR                                                                               | R | K | 95.00% | 37  |                                 | 473.9118  | 3 | 4.6  | 124 | 134 | No |
|     |                                       |       | NVTHIDQALQEAHR                                                                             | R | V | 95.00% | 74  |                                 | 816.4215  | 2 | 5.9  | 221 | 234 | No |
|     |                                       |       | NVTHIDQALQEAHR                                                                             | R | V | 95.00% | 40  |                                 | 544.6164  | 3 | 4.9  | 221 | 234 | No |
|     |                                       |       | SYQYLVESIR                                                                                 | K | R | 95.00% | 36  |                                 | 629.3325  | 2 | 7.4  | 280 | 289 | No |
|     |                                       |       | VYQVFESVAK                                                                                 | K | K | 95.00% | 54  |                                 | 585.3170  | 2 | 4.8  | 68  | 77  | No |
|     |                                       |       | TRIOSEPHOSPHATE ISOMERASE 1 VARIANT.;                                                      |   |   |        |     |                                 |           |   |      |     |     |    |
|     |                                       |       | ISOFORM 1 OF TRIOSEPHOSPHATE ISOMERASE.<br>VDIINAK                                         |   |   |        |     |                                 |           |   |      |     |     |    |
| 506 | IPI00465028; IPI00797687              | TP11  | ELASQPDVDGFLVGGASLKPEF                                                                     | K | - | 95.00% | 60  |                                 | 1010.5410 | 3 | 7.9  | 257 | 285 | No |



|                           |   |   |        |     |                                                               |           |   |     |     |     |     |
|---------------------------|---|---|--------|-----|---------------------------------------------------------------|-----------|---|-----|-----|-----|-----|
| ALVFQPVAEKDKQDQDFEHR      | R | I | 95.00% | 45  |                                                               | 561.5466  | 4 | 7.6 | 788 | 806 | No  |
| AMNWMMSGK                 | K | I | 95.00% | 38  | M2: Oxidation, M5: Oxidation                                  | 478.7053  | 2 | 5.9 | 754 | 761 | No  |
| DLQANVEHLVQK              | R | M | 95.00% | 88  |                                                               | 697.3791  | 2 | 4.6 | 675 | 686 | No  |
| DLQANVEHLVQK              | R | M | 95.00% | 45  |                                                               | 465.2548  | 3 | 3.3 | 675 | 686 | No  |
| EATWESVSMMLQLGGTVIGSAR    | K | C | 95.00% | 39  | M9: Oxidation, M10: Oxidation                                 | 785.7212  | 3 | 6.5 | 138 | 159 | No  |
| GGTPSAFDR                 | R | I | 95.00% | 39  |                                                               | 454.2186  | 2 | 2.2 | 373 | 381 | No  |
| GQIEEAGWSYVGGWTGQGGSK     | K | L | 95.00% | 156 |                                                               | 1077.5080 | 2 | 8.5 | 517 | 537 | No  |
| GQIEEAGWSYVGGWTGQGGSK     | K | L | 95.00% | 97  |                                                               | 718.6717  | 3 | 4.8 | 517 | 537 | No  |
| IGLIQGNR                  | R | V | 95.00% | 62  |                                                               | 435.7640  | 2 | 4.6 | 496 | 503 | No  |
| IMEIVDAITTTAQSHQR         | R | T | 95.00% | 135 | M2: Oxidation                                                 | 965.4959  | 2 | 7.0 | 256 | 272 | No  |
| IMEIVDAITTTAQSHQR         | R | T | 95.00% | 90  | M2: Oxidation                                                 | 643.9972  | 3 | 2.9 | 256 | 272 | No  |
| IMEIVDAITTTAQSHQR         | R | T | 95.00% | 125 |                                                               | 957.4953  | 2 | 3.7 | 256 | 272 | No  |
| IMEIVDAITTTAQSHQR         | R | T | 95.00% | 41  |                                                               | 638.6671  | 3 | 5.2 | 256 | 272 | No  |
| KFDEALK                   | K | L | 95.00% | 42  |                                                               | 425.7391  | 2 | 3.4 | 437 | 443 | No  |
| KNVLGHMQGGSPFPDR          | R | N | 95.00% | 80  | M7: Oxidation                                                 | 992.9891  | 2 | 2.0 | 727 | 744 | No  |
| KNVLGHMQGGSPFPDR          | R | N | 95.00% | 72  | M7: Oxidation                                                 | 662.3289  | 3 | 2.3 | 727 | 744 | No  |
| KNVLGHMQGGSPFPDR          | R | N | 95.00% | 75  |                                                               | 984.9919  | 2 | 2.2 | 727 | 744 | No  |
| KNVLGHMQGGSPFPDR          | R | N | 95.00% | 57  |                                                               | 656.9966  | 3 | 1.2 | 727 | 744 | No  |
| KSFEQISANITK              | K | F | 95.00% | 101 |                                                               | 683.3738  | 2 | 1.4 | 547 | 558 | No  |
| KSFEQISANITK              | K | F | 95.00% | 51  |                                                               | 455.9191  | 3 | 2.7 | 547 | 558 | No  |
| LLAHRPPVSK                | K | S | 95.00% | 41  |                                                               | 608.8809  | 2 | 0.7 | 458 | 468 | No  |
| LLAHRPPVSK                | K | S | 95.00% | 34  |                                                               | 406.2568  | 3 | 1.4 | 458 | 468 | No  |
| LNIIIIVAEGAIDK            | R | N | 95.00% | 124 |                                                               | 684.9136  | 2 | 6.6 | 328 | 340 | No  |
| LNIIIIVAEGAIDK            | R | N | 95.00% | 66  |                                                               | 456.9448  | 3 | 6.1 | 328 | 340 | No  |
| LNIIIIVAEGAIDKNGKPITSEDIK | R | N | 95.00% | 54  |                                                               | 851.1550  | 3 | 5.6 | 328 | 351 | No  |
| LNIIIIVAEGAIDKNGKPITSEDIK | R | N | 95.00% | 23  |                                                               | 638.6191  | 4 | 7.1 | 328 | 351 | No  |
| NVLGHMQGGSPFPDR           | K | N | 95.00% | 81  | M6: Oxidation                                                 | 928.9423  | 2 | 2.8 | 728 | 744 | No  |
| NVLGHMQGGSPFPDR           | K | N | 95.00% | 57  | M6: Oxidation                                                 | 619.6313  | 3 | 3.6 | 728 | 744 | No  |
| NVLGHMQGGSPFPDR           | K | N | 95.00% | 75  |                                                               | 920.9449  | 2 | 2.9 | 728 | 744 | No  |
| NVLGHMQGGSPFPDR           | K | N | 95.00% | 46  |                                                               | 614.2995  | 3 | 3.4 | 728 | 744 | No  |
| RALVFQPVAEK               | K | D | 95.00% | 56  |                                                               | 685.9180  | 2 | 8.7 | 787 | 798 | No  |
| RALVFQPVAEKDKQDQDFEHR     | K | I | 95.00% | 42  |                                                               | 800.4257  | 3 | 6.0 | 787 | 806 | No  |
| RALVFQPVAEKDKQDQDFEHR     | K | I | 95.00% | 50  |                                                               | 600.5724  | 4 | 7.9 | 787 | 806 | No  |
| SEWSDLLSDLQK              | R | A | 95.00% | 94  |                                                               | 710.8575  | 2 | 7.8 | 201 | 212 | No  |
| SEWSDLLSDLQK              | R | A | 95.00% | 52  |                                                               | 474.2417  | 3 | 9.3 | 201 | 212 | No  |
| SFEQISANITK               | K | F | 95.00% | 44  |                                                               | 1237.6490 | 1 | 4.5 | 548 | 558 | No  |
| SFEQISANITK               | K | F | 95.00% | 79  |                                                               | 619.3275  | 2 | 3.5 | 548 | 558 | No  |
| SFMNNWEVYK                | R | L | 95.00% | 51  | M3: Oxidation                                                 | 667.2997  | 2 | 2.4 | 448 | 457 | No  |
| SFMNNWEVYK                | R | L | 95.00% | 55  |                                                               | 659.3032  | 2 | 3.8 | 448 | 457 | No  |
| SGSHTVAVMNVGAPAAGMNAA     | K | S | 95.00% | 85  | M18: Oxidation                                                | 1092.5400 | 2 | 3.1 | 469 | 491 | No  |
| SGSHTVAVMNVGAPAAGMNAA     | K | S | 95.00% | 47  | M18: Oxidation                                                | 728.6955  | 3 | 2.6 | 469 | 491 | No  |
| SGSHTVAVMNVGAPAAGMNAA     | K | S | 95.00% | 118 | M18: Oxidation, M9: Oxidation, M18: Oxidation, M9: Oxidation, | 1100.5360 | 2 | 1.6 | 469 | 491 | No  |
| SGSHTVAVMNVGAPAAGMNAA     | K | S | 95.00% | 60  | M18: Oxidation, M9: Oxidation,                                | 734.0275  | 3 | 3.1 | 469 | 491 | No  |
| SGSHTVAVMNVGAPAAGMNAA     | K | S | 95.00% | 38  | M18: Oxidation,                                               | 550.7718  | 4 | 1.7 | 469 | 491 | No  |
| TFVLEVMGR                 | R | H | 95.00% | 66  | M7: Oxidation                                                 | 534.2839  | 2 | 3.7 | 273 | 281 | No  |
| TFVLEVMGR                 | R | H | 95.00% | 33  |                                                               | 526.2861  | 2 | 3.0 | 273 | 281 | No  |
| VFFVHEGYQGLVDGGDHIK       | R | E | 95.00% | 82  |                                                               | 1059.0340 | 2 | 6.5 | 119 | 137 | No  |
| VFFVHEGYQGLVDGGDHIK       | R | E | 95.00% | 71  |                                                               | 706.3580  | 3 | 5.9 | 119 | 137 | No  |
| VFFVHEGYQGLVDGGDHIK       | R | E | 95.00% | 54  |                                                               | 530.0214  | 4 | 7.6 | 119 | 137 | No  |
| VGIFTGAR                  | R | V | 95.00% | 65  |                                                               | 410.7395  | 2 | 3.6 | 111 | 118 | No  |
| VLVVDHGFEGFLAK            | R | G | 95.00% | 88  |                                                               | 692.3884  | 2 | 3.8 | 504 | 516 | No  |
| VLVVDHGFEGFLAK            | R | G | 95.00% | 56  |                                                               | 461.9272  | 3 | 1.7 | 504 | 516 | No  |
| VTVLGHVQR                 | R | G | 95.00% | 54  |                                                               | 504.8035  | 2 | 3.6 | 364 | 372 | No  |
| YEIDLDTSDHAHLEHITR        | K | K | 95.00% | 127 |                                                               | 1083.0260 | 2 | 7.9 | 826 | 843 | No  |
| YEIDLDTSDHAHLEHITR        | K | K | 95.00% | 67  |                                                               | 722.3515  | 3 | 5.8 | 826 | 843 | No  |
| AAVPSGASTGIYEALELR        | R | D | 95.00% | 58  | S8: Phospho                                                   | 942.9679  | 2 | 9.0 | 33  | 50  | Yes |
| AAVPSGASTGIYEALELR        | R | D | 95.00% | 42  | T9: Phospho                                                   | 942.9656  | 2 | 6.5 | 33  | 50  | Yes |
| AAVPSGASTGIYEALELR        | R | D | 95.00% | 60  | Y12: Phospho                                                  | 942.9658  | 2 | 6.8 | 33  | 50  | Yes |
| AAVPSGASTGIYEALELR        | R | D | 95.00% | 162 |                                                               | 902.9806  | 2 | 4.8 | 33  | 50  | Yes |
| AAVPSGASTGIYEALELR        | R | D | 95.00% | 99  |                                                               | 602.3227  | 3 | 4.4 | 33  | 50  | Yes |

509 IPI00465248

ENO1

ISOFORM ALPHA-ENOLASE OF ALPHA-ENOLASE.

|     |             |      |                                           |                          |   |   |        |     |                              |           |   |     |     |     |     |
|-----|-------------|------|-------------------------------------------|--------------------------|---|---|--------|-----|------------------------------|-----------|---|-----|-----|-----|-----|
|     |             |      |                                           | DATNVGDEGGFAPNILENK      | K | E | 95.00% | 137 |                              | 980.9750  | 2 | 8.6 | 203 | 221 | No  |
|     |             |      |                                           | DATNVGDEGGFAPNILENK      | K | E | 95.00% | 52  |                              | 654.3183  | 3 | 7.0 | 203 | 221 | No  |
|     |             |      |                                           | DATNVGDEGGFAPNILENKEGL   |   |   |        |     |                              |           |   |     |     |     |     |
|     |             |      |                                           | ELLK                     | K | T | 95.00% | 96  |                              | 1372.2060 | 2 | 9.1 | 203 | 228 | No  |
|     |             |      |                                           | DATNVGDEGGFAPNILENKEGL   |   |   |        |     |                              |           |   |     |     |     |     |
|     |             |      |                                           | ELLK                     | K | T | 95.00% | 68  |                              | 915.1392  | 3 | 8.5 | 203 | 228 | No  |
|     |             |      |                                           | FTASAGIQVVGDLLVTNPK      | K | R | 95.00% | 114 |                              | 1017.0410 | 2 | 8.9 | 307 | 326 | No  |
|     |             |      |                                           | FTASAGIQVVGDLLVTNPK      | K | R | 95.00% | 72  |                              | 678.3605  | 3 | 5.0 | 307 | 326 | No  |
|     |             |      |                                           | GNPTVEVDLFTSK            | R | G | 95.00% | 84  |                              | 703.8681  | 2 | 8.2 | 16  | 28  | No  |
|     |             |      |                                           | HIADLAGNSEVILPVPFNFVINGG |   |   |        |     |                              |           |   |     |     |     |     |
|     |             |      |                                           | SHAGNK                   | R | L | 95.00% | 67  |                              | 1004.5360 | 3 | 7.7 | 133 | 162 | No  |
|     |             |      |                                           | IDKLMIEDGTENK            | K | S | 95.00% | 79  | M5: Oxidation, M8: Oxidation | 834.8981  | 2 | 3.4 | 90  | 103 | No  |
|     |             |      |                                           | IDKLMIEDGTENK            | K | S | 95.00% | 58  | M5: Oxidation, M8: Oxidation | 556.9350  | 3 | 4.0 | 90  | 103 | No  |
|     |             |      |                                           | IGAEVYHNLK               | R | N | 95.00% | 60  |                              | 572.3137  | 2 | 2.8 | 184 | 193 | No  |
|     |             |      |                                           | LAMQEFMILPVGAANFR        | K | E | 95.00% | 111 | M3: Oxidation, M7: Oxidation | 970.5013  | 2 | 9.0 | 163 | 179 | No  |
|     |             |      |                                           | LAMQEFMILPVGAANFR        | K | E | 95.00% | 49  | M3: Oxidation, M7: Oxidation | 647.3343  | 3 | 5.1 | 163 | 179 | No  |
|     |             |      |                                           | LAQANGWGVMSVSHR          | K | S | 95.00% | 50  | M10: Oxidation               | 771.3892  | 2 | 4.0 | 359 | 372 | No  |
|     |             |      |                                           | LAQANGWGVMSVSHR          | K | S | 95.00% | 43  | M10: Oxidation               | 514.5943  | 3 | 1.7 | 359 | 372 | No  |
|     |             |      |                                           | LMIEMDGTENK              | K | S | 95.00% | 74  | M2: Oxidation, M5: Oxidation | 656.7942  | 2 | 3.1 | 93  | 103 | No  |
|     |             |      |                                           | SGKYDLDFK                | R | S | 95.00% | 31  |                              | 536.7712  | 2 | 2.7 | 254 | 262 | No  |
|     |             |      |                                           | VNQIGSVTESLQACK          | K | L | 95.00% | 98  |                              | 788.9106  | 2 | 8.1 | 344 | 358 | No  |
|     |             |      |                                           | VVIGMDVAASEFFR           | K | S | 95.00% | 118 | M5: Oxidation                | 778.8987  | 2 | 7.4 | 240 | 253 | No  |
|     |             |      |                                           | VVIGMDVAASEFFR           | K | S | 95.00% | 46  | M5: Oxidation                | 519.6006  | 3 | 5.1 | 240 | 253 | No  |
|     |             |      |                                           | YDLDFK                   | K | S | 95.00% | 44  |                              | 400.6961  | 2 | 1.4 | 257 | 262 | Yes |
|     |             |      |                                           | YDLDFKSPDDPSR            | K | Y | 95.00% | 38  |                              | 777.8614  | 2 | 4.5 | 257 | 269 | No  |
|     |             |      |                                           | YDLDFKSPDDPSR            | K | Y | 95.00% | 50  |                              | 518.9086  | 3 | 1.4 | 257 | 269 | No  |
|     |             |      |                                           | YGKDATNVGDEGGFAPNILENK   |   |   |        |     |                              |           |   |     |     |     |     |
|     |             |      |                                           | EGLELLK                  | K | T | 95.00% | 88  |                              | 1031.1960 | 3 | 4.4 | 200 | 228 | No  |
|     |             |      |                                           | YISPDQLADLYK             | R | S | 95.00% | 82  |                              | 713.3703  | 2 | 4.3 | 270 | 281 | No  |
|     |             |      |                                           | YNQLLR                   | K | I | 95.00% | 30  |                              | 403.7312  | 2 | 2.6 | 407 | 412 | No  |
| 510 | IP100465256 | AK3  | GTP:AMP PHOSPHOTRANSFERASE MITOCHONDRIAL. | AVIMGAPGSGK              | R | G | 95.00% | 60  | M4: Oxidation                | 502.2700  | 2 | 7.3 | 10  | 20  | No  |
|     |             |      |                                           | AYEDQTKPVLEYYQK          | K | K | 95.00% | 64  |                              | 937.9713  | 2 | 9.1 | 175 | 189 | No  |
|     |             |      |                                           | AYEDQTKPVLEYYQK          | K | K | 95.00% | 54  |                              | 625.6452  | 3 | 1.1 | 175 | 189 | No  |
|     |             |      |                                           | EDDKPETVIKR              | R | L | 95.00% | 34  |                              | 443.9075  | 3 | 3.9 | 162 | 172 | No  |
|     |             |      |                                           | GTEIGVLAK                | R | A | 95.00% | 57  |                              | 444.2666  | 2 | 5.6 | 49  | 57  | No  |
|     |             |      |                                           | GVLETFSGTETNK            | K | I | 95.00% | 101 |                              | 691.8481  | 2 | 5.8 | 191 | 203 | No  |
|     |             |      |                                           | KGVLETFSGTETNK           | K | I | 95.00% | 58  |                              | 755.8987  | 2 | 9.3 | 190 | 203 | No  |
|     |             |      |                                           | TLPQAEALDR               | R | A | 95.00% | 50  |                              | 557.3014  | 2 | 4.1 | 95  | 104 | No  |
|     |             |      |                                           | TVGIDDLTGEPLIQR          | K | E | 95.00% | 77  |                              | 813.9469  | 2 | 9.4 | 147 | 161 | No  |
|     |             |      |                                           | VYNIEFNPPK               | R | T | 95.00% | 41  |                              | 610.8252  | 2 | 9.0 | 137 | 146 | No  |
| 511 | IP100465315 | CYCS | CYTOCHROME C.                             | ADLIAYLK                 | R | K | 95.00% | 28  |                              | 906.5385  | 1 | 9.2 | 93  | 100 | No  |
|     |             |      |                                           | ADLIAYLK                 | R | K | 95.00% | 56  |                              | 453.7712  | 2 | 4.8 | 93  | 100 | No  |
|     |             |      |                                           | ADLIAYLKK                | R | A | 95.00% | 48  |                              | 517.8207  | 2 | 8.1 | 93  | 101 | No  |
|     |             |      |                                           | GIIWGEDTLMEYLENPK        | K | K | 95.00% | 66  | M10: Oxidation               | 1012.4960 | 2 | 7.1 | 57  | 73  | No  |
|     |             |      |                                           | GIIWGEDTLMEYLENPK        | K | K | 95.00% | 80  |                              | 1004.4940 | 2 | 2.9 | 57  | 73  | No  |
|     |             |      |                                           | GIIWGEDTLMEYLENPKK       | K | Y | 95.00% | 99  | M10: Oxidation               | 1076.5460 | 2 | 9.4 | 57  | 74  | No  |
|     |             |      |                                           | KTGOAPGYSYTAANK          | R | N | 95.00% | 94  |                              | 778.8951  | 2 | 7.4 | 40  | 54  | No  |
|     |             |      |                                           | KTGOAPGYSYTAANK          | R | N | 95.00% | 53  |                              | 519.5981  | 3 | 5.1 | 40  | 54  | No  |
|     |             |      |                                           | MIFVGIK                  | K | K | 95.00% | 33  | M1: Oxidation                | 823.4828  | 1 | 9.1 | 81  | 87  | No  |
|     |             |      |                                           | TGPNLHGLFGR              | K | K | 95.00% | 91  |                              | 584.8179  | 2 | 4.4 | 29  | 39  | No  |
|     |             |      |                                           | TGQAPGYSYTAANK           | K | N | 95.00% | 95  |                              | 714.8478  | 2 | 8.3 | 41  | 54  | No  |
| 512 | IP100465436 | CAT  | CATALASE.                                 | ADVLTTGAGNPVGDK          | K | L | 95.00% | 87  |                              | 707.8640  | 2 | 1.6 | 24  | 38  | No  |
|     |             |      |                                           | ADVLTTGAGNPVGDKLNVITVGP  |   |   |        |     |                              |           |   |     |     |     |     |
|     |             |      |                                           | R                        | K | G | 95.00% | 77  |                              | 788.7744  | 3 | 8.0 | 24  | 47  | No  |
|     |             |      |                                           | AFYVNVLNEEQR             | R | K | 95.00% | 92  |                              | 741.3777  | 2 | 5.9 | 445 | 456 | No  |
|     |             |      |                                           | DAQIFIQK                 | K | K | 95.00% | 38  |                              | 962.5360  | 1 | 4.8 | 469 | 476 | No  |
|     |             |      |                                           | DAQIFIQK                 | K | K | 95.00% | 50  |                              | 481.7699  | 2 | 0.6 | 469 | 476 | No  |
|     |             |      |                                           | DLFNAIATGK               | R | Y | 95.00% | 45  |                              | 1049.5720 | 1 | 7.9 | 264 | 273 | No  |
|     |             |      |                                           | DLFNAIATGK               | R | Y | 95.00% | 51  |                              | 525.2875  | 2 | 3.7 | 264 | 273 | No  |
|     |             |      |                                           | DPILFPSFIHSQK            | R | R | 95.00% | 66  |                              | 764.9194  | 2 | 9.4 | 157 | 169 | No  |
|     |             |      |                                           | DPILFPSFIHSQK            | R | R | 95.00% | 43  |                              | 510.2801  | 3 | 5.4 | 157 | 169 | No  |
|     |             |      |                                           | FNTANDDNVTQVR            | R | A | 95.00% | 103 |                              | 747.3555  | 2 | 3.1 | 432 | 444 | No  |
|     |             |      |                                           | FSTVAGESGSADTVR          | R | D | 95.00% | 98  |                              | 742.3576  | 2 | 3.0 | 113 | 127 | No  |
|     |             |      |                                           | FSTVAGESGSADTVRDP        | R | G | 95.00% | 46  |                              | 617.9682  | 3 | 2.8 | 113 | 130 | No  |

|                         |   |   |        |     |                |           |   |      |     |     |    |
|-------------------------|---|---|--------|-----|----------------|-----------|---|------|-----|-----|----|
| GAGAFGYFEVTHDITK        | K | Y | 95.00% | 101 |                | 856.9245  | 2 | 7.3  | 78  | 93  | No |
| GAGAFGYFEVTHDITK        | K | Y | 95.00% | 35  |                | 571.6184  | 3 | 6.4  | 78  | 93  | No |
| GPLLVQDVVFTDEMAHFDR     | R | E | 95.00% | 61  | M14: Oxidation | 735.7004  | 3 | 9.2  | 48  | 66  | No |
| GPLLVQDVVFTDEMAHFDRER   | R | I | 95.00% | 45  | M14: Oxidation | 830.7493  | 3 | 9.4  | 48  | 68  | No |
| GPLLVQDVVFTDEMAHFDRER   | R | I | 95.00% | 57  | M14: Oxidation | 623.3124  | 4 | 6.9  | 48  | 68  | No |
| LNVTIVGPR               | K | G | 95.00% | 60  |                | 484.7995  | 2 | 1.8  | 39  | 47  | No |
| LSQEDPDYGIR             | R | D | 95.00% | 51  |                | 646.8121  | 2 | 3.1  | 253 | 263 | No |
| NAIHTFVQSGSHLAAR        | K | E | 95.00% | 93  |                | 854.9543  | 2 | 7.2  | 507 | 522 | No |
| NAIHTFVQSGSHLAAR        | K | E | 95.00% | 67  |                | 570.3040  | 3 | 4.6  | 507 | 522 | No |
| NFTEVHPDYGSHIQALLDK     | K | Y | 95.00% | 37  |                | 728.7002  | 3 | 5.7  | 481 | 499 | No |
| NFTEVHPDYGSHIQALLDKYNAE |   |   |        |     |                |           |   |      |     |     |    |
| KPK                     | K | N | 95.00% | 36  |                | 1005.5150 | 3 | 9.0  | 481 | 506 | No |
| NLSVEDAAR               | K | L | 95.00% | 51  |                | 487.7501  | 2 | 1.8  | 244 | 252 | No |
| NPVNYFAEVEQIAFDPSNMPPGI |   |   |        |     |                |           |   |      |     |     |    |
| EASPK                   | R | M | 95.00% | 75  | M19: Oxidation | 1064.8430 | 3 | 9.9  | 321 | 349 | No |
| RFNTANDDNVTQVR          | R | A | 95.00% | 55  |                | 825.4116  | 2 | 9.5  | 431 | 444 | No |
| VWPHKDYPLIPVGK          | K | L | 95.00% | 37  |                | 550.3153  | 3 | 5.0  | 302 | 315 | No |
| AAQEEYVK                | K | R | 95.00% | 61  |                | 469.2400  | 2 | 9.8  | 323 | 330 | No |
| AAQEEYVKR               | K | A | 95.00% | 76  |                | 547.2892  | 2 | 5.8  | 323 | 331 | No |
| ADDGRPFQVIK             | K | S | 95.00% | 53  |                | 671.8621  | 2 | 3.0  | 88  | 99  | No |
| ADDGRPFQVIK             | K | S | 95.00% | 57  |                | 448.2433  | 3 | 1.5  | 88  | 99  | No |
| ALANSLACQK              | R | Y | 95.00% | 64  |                | 538.2861  | 2 | 6.7  | 332 | 342 | No |
| ALQASALK                | R | A | 95.00% | 69  |                | 401.2468  | 2 | 3.0  | 305 | 312 | No |
| ALSDHHIYLEGTLK          | K | P | 95.00% | 50  |                | 570.6486  | 3 | 4.1  | 216 | 230 | No |
| DGADFAK                 | K | W | 95.00% | 40  |                | 723.3379  | 1 | 8.9  | 141 | 147 | No |
| ELSDIAHR                | K | I | 95.00% | 38  |                | 940.4908  | 1 | 5.9  | 15  | 22  | No |
| ELSDIAHR                | K | I | 95.00% | 48  |                | 470.7505  | 2 | 8.5  | 15  | 22  | No |
| FSHEEIAMATVTALR         | K | R | 95.00% | 117 | M8: Oxidation  | 846.4308  | 2 | 6.5  | 244 | 258 | No |
| FSHEEIAMATVTALR         | K | R | 95.00% | 57  | M8: Oxidation  | 564.6208  | 3 | 2.4  | 244 | 258 | No |
| FSHEEIAMATVTALR         | K | R | 95.00% | 111 |                | 838.4349  | 2 | 8.5  | 244 | 258 | No |
| FSHEEIAMATVTALR         | K | R | 95.00% | 46  |                | 559.2904  | 3 | 4.6  | 244 | 258 | No |
| FSHEEIAMATVTALRR        | K | T | 95.00% | 38  | M8: Oxidation  | 924.4773  | 2 | 1.6  | 244 | 259 | No |
| FSHEEIAMATVTALRR        | K | T | 95.00% | 31  | M8: Oxidation  | 616.6549  | 3 | 2.8  | 244 | 259 | No |
| FSHEEIAMATVTALRR        | K | T | 95.00% | 49  | M8: Oxidation  | 462.7453  | 4 | 7.5  | 244 | 259 | No |
| FSHEEIAMATVTALRR        | K | T | 95.00% | 51  |                | 916.4863  | 2 | 8.7  | 244 | 259 | No |
| FSHEEIAMATVTALRR        | K | T | 95.00% | 32  |                | 458.7447  | 4 | 3.5  | 244 | 259 | No |
| GGVVGKIVDK              | K | G | 95.00% | 43  |                | 971.5954  | 1 | 6.4  | 102 | 111 | No |
| GGVVGKIVDK              | K | G | 95.00% | 32  |                | 486.2996  | 2 | 2.3  | 102 | 111 | No |
| GILAADESTGSIK           | K | R | 95.00% | 67  | S11: Phospho   | 706.8398  | 2 | 2.9  | 29  | 42  | No |
| GILAADESTGSIK           | K | R | 95.00% | 61  | S8: Phospho    | 706.8412  | 2 | 4.9  | 29  | 42  | No |
| GILAADESTGSIK           | K | R | 95.00% | 63  | T9: Phospho    | 706.8402  | 2 | 3.5  | 29  | 42  | No |
| GILAADESTGSIK           | K | R | 95.00% | 65  |                | 1332.7130 | 1 | 9.0  | 29  | 42  | No |
| GILAADESTGSIK           | K | R | 95.00% | 107 |                | 666.8547  | 2 | 0.2  | 29  | 42  | No |
| GILAADESTGSIKR          | K | L | 95.00% | 68  | S11: Phospho   | 784.8915  | 2 | 4.1  | 29  | 43  | No |
| GILAADESTGSIKR          | K | L | 95.00% | 66  | S8: Phospho    | 784.8919  | 2 | 4.7  | 29  | 43  | No |
| GILAADESTGSIKR          | K | L | 95.00% | 56  | T9: Phospho    | 784.8920  | 2 | 4.7  | 29  | 43  | No |
| GILAADESTGSIKR          | K | L | 95.00% | 116 |                | 744.9055  | 2 | 0.5  | 29  | 43  | No |
| GILAADESTGSIKR          | K | L | 95.00% | 48  |                | 496.9400  | 3 | 1.4  | 29  | 43  | No |
| GVVPLAGTNGETTTQGLDGLSE  |   |   |        |     |                |           |   |      |     |     |    |
| R                       | K | C | 95.00% | 146 |                | 1136.5840 | 2 | 8.1  | 112 | 134 | No |
| GVVPLAGTNGETTTQGLDGLSE  |   |   |        |     |                |           |   |      |     |     |    |
| R                       | K | C | 95.00% | 82  |                | 758.0576  | 3 | 6.6  | 112 | 134 | No |
| IGEHTPSALAIMENANVLAR    | K | Y | 95.00% | 102 | M12: Oxidation | 1062.0600 | 2 | 9.7  | 154 | 173 | No |
| IGEHTPSALAIMENANVLAR    | K | Y | 95.00% | 87  | M12: Oxidation | 708.3732  | 3 | 5.8  | 154 | 173 | No |
| IGEHTPSALAIMENANVLAR    | K | Y | 95.00% | 132 |                | 1054.0620 | 2 | 9.3  | 154 | 173 | No |
| IGEHTPSALAIMENANVLAR    | K | Y | 95.00% | 61  |                | 703.0423  | 3 | 6.8  | 154 | 173 | No |
| IVAPGK                  | R | G | 95.00% | 28  |                | 584.3799  | 1 | 4.6  | 23  | 28  | No |
| IVAPGKGILAADESTGSIK     | R | R | 95.00% | 105 |                | 949.5430  | 2 | 9.5  | 23  | 42  | No |
| IVAPGKGILAADESTGSIK     | R | R | 95.00% | 54  |                | 633.3616  | 3 | 4.7  | 23  | 42  | No |
| IVAPGKGILAADESTGSIKR    | R | L | 95.00% | 39  |                | 685.3953  | 3 | 4.4  | 23  | 43  | No |
| KDGADFAK                | K | W | 95.00% | 32  |                | 426.2192  | 2 | 4.9  | 140 | 147 | No |
| KELSDIAHR               | K | I | 95.00% | 64  |                | 534.7981  | 2 | 7.5  | 14  | 22  | No |
| LQSIGTENTEENR           | R | R | 95.00% | 111 |                | 745.8605  | 2 | 3.0  | 44  | 56  | No |
| LQSIGTENTEENRR          | R | F | 95.00% | 39  |                | 823.9040  | 2 | -5.9 | 44  | 57  | No |
| LQSIGTENTEENRR          | R | F | 95.00% | 53  |                | 549.6113  | 3 | 5.1  | 44  | 57  | No |
| PYQYPALTPEQK            | M | K | 95.00% | 52  |                | 1434.7390 | 1 | 8.0  | 2   | 13  | No |
| PYQYPALTPEQK            | M | K | 95.00% | 81  |                | 717.8690  | 2 | 2.0  | 2   | 13  | No |
| PYQYPALTPEQK            | M | K | 95.00% | 49  |                | 478.9152  | 3 | 2.0  | 2   | 13  | No |
| PYQYPALTPEQKK           | M | E | 95.00% | 70  |                | 781.9160  | 2 | 1.3  | 2   | 14  | No |
| PYQYPALTPEQKK           | M | E | 95.00% | 47  |                | 521.6132  | 3 | 1.2  | 2   | 14  | No |

|     |                          |          |                                                                                             |                          |   |   |        |     |                               |           |                                               |      |     |     |    |
|-----|--------------------------|----------|---------------------------------------------------------------------------------------------|--------------------------|---|---|--------|-----|-------------------------------|-----------|-----------------------------------------------|------|-----|-----|----|
|     |                          |          |                                                                                             | QLLLTADDR                | R | V | 95.00% | 44  |                               | 1044.5760 | 1                                             | 6.5  | 61  | 69  | No |
|     |                          |          |                                                                                             | QLLLTADDR                | R | V | 95.00% | 79  |                               | 522.7914  | 2                                             | 5.6  | 61  | 69  | No |
|     |                          |          |                                                                                             | RLQSIGTENTEENRR          | K | F | 95.00% | 65  |                               | 901.9653  | 2                                             | 6.6  | 43  | 57  | No |
|     |                          |          |                                                                                             | RLQSIGTENTEENRR          | K | F | 95.00% | 59  |                               | 601.6415  | 3                                             | -1.0 | 43  | 57  | No |
|     |                          |          |                                                                                             | RLQSIGTENTEENRR          | K | F | 95.00% | 41  |                               | 451.4850  | 4                                             | 3.3  | 43  | 57  | No |
|     |                          |          |                                                                                             | RTVPPAVTGITFLSGGQSEEEAS  |   |   |        |     |                               |           |                                               |      |     |     |    |
|     |                          |          |                                                                                             | INLNAINK                 | R | C | 95.00% | 71  |                               | 1071.9070 | 3                                             | 9.4  | 259 | 289 | No |
|     |                          |          |                                                                                             | SKGGVVGIK                | K | V | 95.00% | 38  |                               | 422.7685  | 2                                             | 4.2  | 100 | 108 | No |
|     |                          |          |                                                                                             | SKGGVVGIKVDK             | K | G | 95.00% | 28  |                               | 593.8657  | 2                                             | 6.3  | 100 | 111 | No |
|     |                          |          |                                                                                             | TVPPAVTGITFLSGGQSEEEASI  |   |   |        |     |                               |           |                                               |      |     |     |    |
|     |                          |          |                                                                                             | NLNAINK                  | R | C | 95.00% | 91  |                               | 1019.8730 | 3                                             | 9.1  | 260 | 289 | No |
|     |                          |          |                                                                                             | TVPPAVTGITFLSGGQSEEEASI  |   |   |        |     |                               |           |                                               |      |     |     |    |
|     |                          |          |                                                                                             | NLNAINK                  | R | C | 95.00% | 46  |                               | 765.1548  | 4                                             | 7.1  | 260 | 289 | No |
|     |                          |          |                                                                                             | VDKGVVPLAGTNGETTTQGLDG   |   |   |        |     |                               |           |                                               |      |     |     |    |
|     |                          |          |                                                                                             | LSER                     | K | C | 95.00% | 93  |                               | 1307.6810 | 2                                             | 8.2  | 109 | 134 | No |
|     |                          |          |                                                                                             | VDKGVVPLAGTNGETTTQGLDG   |   |   |        |     |                               |           |                                               |      |     |     |    |
|     |                          |          |                                                                                             | LSER                     | K | C | 95.00% | 83  |                               | 872.1231  | 3                                             | 8.0  | 109 | 134 | No |
|     |                          |          |                                                                                             | VDKGVVPLAGTNGETTTQGLDG   |   |   |        |     |                               |           |                                               |      |     |     |    |
|     |                          |          |                                                                                             | LSER                     | K | C | 95.00% | 43  |                               | 654.3414  | 4                                             | 3.6  | 109 | 134 | No |
|     |                          |          |                                                                                             | VLAAYK                   | K | A | 95.00% | 49  |                               | 763.4747  | 1                                             | 3.8  | 209 | 215 | No |
|     |                          |          |                                                                                             | YTPSQAGAAASESLFVSNHAY    | K | - | 95.00% | 164 |                               | 1114.5270 | 2                                             | 9.2  | 343 | 364 | No |
|     |                          |          |                                                                                             | YTPSQAGAAASESLFVSNHAY    | K | - | 95.00% | 81  |                               | 743.3533  | 3                                             | 8.3  | 343 | 364 | No |
| 514 | IPI00470359              | TNNC1    | TROPONIN C, SLOW SKELETAL AND CARDIAC MUSCLES.                                              | AAVEQLTEEQK              | K | N | 95.00% | 65  |                               | 623.3236  | 2                                             | 5.3  | 7   | 17  | No |
|     |                          |          |                                                                                             | AAVEQLTEEQKNEFK          | K | A | 95.00% | 94  |                               | 882.4510  | 2                                             | 7.1  | 7   | 21  | No |
|     |                          |          |                                                                                             | AAVEQLTEEQKNEFK          | K | A | 95.00% | 51  |                               | 588.6341  | 3                                             | 2.9  | 7   | 21  | No |
|     |                          |          |                                                                                             | GKSEELSDLFR              | K | M | 95.00% | 84  |                               | 705.3562  | 2                                             | 9.4  | 91  | 102 | No |
|     |                          |          |                                                                                             | GKSEELSDLFR              | K | M | 95.00% | 62  |                               | 470.5713  | 3                                             | 5.0  | 91  | 102 | No |
|     |                          |          |                                                                                             | IDYDEFLEFMK              | R | G | 95.00% | 78  | M10: Oxidation                | 733.3392  | 2                                             | 9.7  | 148 | 158 | No |
|     |                          |          |                                                                                             | IMLQATGETITIEDDIEELMK    | K | D | 95.00% | 114 | M2: Oxidation, M19: Oxidation | 771.3757  | 3                                             | 9.7  | 119 | 138 | No |
|     |                          |          |                                                                                             | IMLQATGETITIEDDIEELMKDGD |   |   |        |     |                               |           |                                               |      |     |     |    |
|     |                          |          |                                                                                             | K                        | K | N | 95.00% | 35  | M19: Oxidation                | 909.7646  | 3                                             | 6.7  | 119 | 142 | No |
|     |                          |          |                                                                                             | NADGYIDLDELK             | K | I | 95.00% | 87  |                               | 683.3354  | 2                                             | 6.6  | 107 | 118 | No |
|     |                          |          |                                                                                             | SEELSDLFR                | K | M | 95.00% | 36  |                               | 612.7960  | 2                                             | 7.6  | 93  | 102 | No |
| 515 | IPI00470535              | CACNA2D1 | DIHYDROPYRIDINE RECEPTOR ALPHA 2 SUBUNIT.                                                   | AKLEETITQAR              | K | S | 95.00% | 48  |                               | 630.3556  | 2                                             | 5.7  | 633 | 643 | No |
|     |                          |          |                                                                                             | AKLEETITQAR              | K | S | 95.00% | 30  |                               | 420.5690  | 3                                             | -3.9 | 633 | 643 | No |
|     |                          |          |                                                                                             | FFGEIDPSLMR              | R | H | 95.00% | 52  | M10: Oxidation                | 664.3260  | 2                                             | 6.3  | 881 | 891 | No |
|     |                          |          |                                                                                             | FVVTGGITR                | R | V | 95.00% | 67  |                               | 532.7923  | 2                                             | 2.4  | 740 | 749 | No |
|     |                          |          |                                                                                             | IIMLFTDGGEER             | K | A | 95.00% | 54  | M3: Oxidation                 | 698.8475  | 2                                             | 6.3  | 357 | 368 | No |
|     |                          |          |                                                                                             | IKPVFIEDANFGR            | R | Q | 95.00% | 65  |                               | 753.4155  | 2                                             | 7.5  | 145 | 157 | No |
|     |                          |          |                                                                                             | IKPVFIEDANFGR            | R | Q | 95.00% | 51  |                               | 502.6116  | 3                                             | 4.9  | 145 | 157 | No |
|     |                          |          |                                                                                             | INTQEYLDVLRPMVLAGDK      | R | A | 95.00% | 51  | M14: Oxidation                | 750.0648  | 3                                             | 6.1  | 421 | 440 | No |
|     |                          |          |                                                                                             | INTQEYLDVLRPMVLAGDK      | R | A | 95.00% | 41  |                               | 744.7325  | 3                                             | 5.3  | 421 | 440 | No |
|     |                          |          |                                                                                             | MQEDLVTLAK               | K | T | 95.00% | 41  |                               | 574.3076  | 2                                             | 3.4  | 40  | 49  | No |
|     |                          |          |                                                                                             | NQLILGVMGVDSLEDIKR       | K | L | 95.00% | 41  | M8: Oxidation                 | 705.7256  | 3                                             | 6.0  | 481 | 499 | No |
|     |                          |          |                                                                                             | NREEDPSSLWQVFGSATGLAR    | K | Y | 95.00% | 55  |                               | 782.7402  | 3                                             | 8.8  | 196 | 216 | No |
|     |                          |          |                                                                                             | PIGVGIPTINLR             | K | K | 95.00% | 48  |                               | 625.3917  | 2                                             | 9.8  | 531 | 542 | No |
|     |                          |          |                                                                                             | SGPGAYESGIMVSK           | K | A | 95.00% | 48  | M11: Oxidation                | 699.8345  | 2                                             | 2.6  | 790 | 803 | No |
|     |                          |          |                                                                                             | TASGVNQLVDIYEK           | K | Y | 95.00% | 94  |                               | 768.9061  | 2                                             | 8.7  | 50  | 63  | No |
|     |                          |          |                                                                                             | TPNKIDLYDVR              | R | R | 95.00% | 29  |                               | 445.2445  | 3                                             | 4.5  | 229 | 239 | No |
|     |                          |          |                                                                                             | VFTFSVQGHNYDR            | R | G | 95.00% | 63  |                               | 785.3813  | 2                                             | 6.3  | 384 | 396 | No |
|     |                          |          |                                                                                             | YQDLYTVEPNAR             | K | Q | 95.00% | 55  |                               | 791.8859  | 2                                             | 8.7  | 64  | 76  | No |
| 516 | IPI00470631; IPI00746245 | COQ9     | ISOFORM 1 OF UBIQUINONE BIOSYNTHESIS PROTEIN COQ9, MITOCHONDRIALPRECURSOR.; 36 KDA PROTEIN. | AMLAAYINTTELVMMQDSSPDF   |   |   |        |     |                               |           | M2: Oxidation, M14: Oxidation, M15: Oxidation |      |     |     |    |
|     |                          |          |                                                                                             | EDTWR                    | R | F | 95.00% | 45  |                               | 1061.8120 | 3                                             | 7.5  | 245 | 271 | No |
|     |                          |          |                                                                                             | LVQLGQAEK                | K | R | 95.00% | 63  |                               | 493.2902  | 2                                             | 4.1  | 167 | 175 | No |
|     |                          |          |                                                                                             | STGEALVQGLMGAAVTLK       | K | N | 95.00% | 93  | M11: Oxidation                | 881.4827  | 2                                             | 8.7  | 292 | 309 | No |
|     |                          |          |                                                                                             | STGEALVQGLMGAAVTLK       | K | N | 95.00% | 75  | M11: Oxidation                | 587.9913  | 3                                             | 9.1  | 292 | 309 | No |
|     |                          |          |                                                                                             | YTDQGEEEEEDYESEELQHR     | R | I | 95.00% | 79  |                               | 857.6894  | 3                                             | 5.0  | 82  | 102 | No |
| 517 | IPI00470674              | CYB5R1   | NAD(P)H:QUINONE OXIDOREDUCTASE TYPE 3, POLYPEPTIDE A2.                                      | DIILREDLEELQAR           | K | Y | 95.00% | 56  |                               | 856.9691  | 2                                             | 6.9  | 219 | 232 | No |
|     |                          |          |                                                                                             | DIILREDLEELQAR           | K | Y | 95.00% | 60  |                               | 571.6491  | 3                                             | 7.6  | 219 | 232 | No |
|     |                          |          |                                                                                             | EDLEELQAR                | R | Y | 95.00% | 53  |                               | 1102.5440 | 1                                             | 5.1  | 224 | 232 | No |

|     |                          |       |                                                                      |                          |   |   |        |     |                 |           |   |     |     |     |     |
|-----|--------------------------|-------|----------------------------------------------------------------------|--------------------------|---|---|--------|-----|-----------------|-----------|---|-----|-----|-----|-----|
|     |                          |       |                                                                      | EDLEELQAR                | R | Y | 95.00% | 84  |                 | 551.7763  | 2 | 6.0 | 224 | 232 | No  |
|     |                          |       |                                                                      | FALPTAHTLGLPVGK          | R | H | 95.00% | 38  |                 | 829.9800  | 2 | 8.3 | 66  | 81  | No  |
|     |                          |       |                                                                      | FALPTAHTLGLPVGK          | R | H | 95.00% | 23  |                 | 553.6548  | 3 | 6.3 | 66  | 81  | No  |
|     |                          |       |                                                                      | GFVTADMIR                | K | E | 95.00% | 55  | M7: Oxidation   | 513.2604  | 2 | 3.9 | 255 | 263 | No  |
|     |                          |       |                                                                      | GHFNIQPNKK               | K | S | 95.00% | 42  |                 | 591.8282  | 2 | 8.6 | 159 | 168 | No  |
|     |                          |       |                                                                      | GIQTSPLLASLGVLLTLLGLA    |   |   |        |     |                 |           |   |     |     |     |     |
|     |                          |       |                                                                      | VGSYLVR                  | M | R | 95.00% | 39  |                 | 742.4526  | 4 | 7.2 | 2   | 31  | No  |
|     |                          |       |                                                                      | GPSGLLTYTGK              | R | G | 95.00% | 34  |                 | 1093.5980 | 1 | 8.0 | 148 | 158 | No  |
|     |                          |       |                                                                      | GPSGLLTYTGK              | R | G | 95.00% | 64  |                 | 547.3022  | 2 | 6.4 | 148 | 158 | No  |
|     |                          |       |                                                                      | HIYLSTR                  | K | I | 95.00% | 32  |                 | 445.2510  | 2 | 5.3 | 82  | 88  | No  |
|     |                          |       |                                                                      | KLGMIAGGTGITPMLQLIR      | K | A | 95.00% | 28  | M4: Oxidation,  | 668.0508  | 3 | 8.5 | 178 | 196 | No  |
|     |                          |       |                                                                      | LGMIAGGTGITPMLQLIR       | K | A | 95.00% | 109 | M14: Oxidation  | 929.5253  | 2 | 6.9 | 179 | 196 | No  |
|     |                          |       |                                                                      | LGMIAGGTGITPMLQLIR       | K | A | 95.00% | 124 | M3: Oxidation,  | 937.5190  | 2 | 2.9 | 179 | 196 | No  |
|     |                          |       |                                                                      | LGMIAGGTGITPMLQLIR       | K | A | 95.00% | 43  | M13: Oxidation, | 625.3518  | 3 | 7.9 | 179 | 196 | No  |
|     |                          |       |                                                                      | LGMIAGGTGITPMLQLIR       | K | A | 95.00% | 111 | M13: Oxidation  | 921.5289  | 2 | 8.1 | 179 | 196 | No  |
|     |                          |       |                                                                      | LWFTLDHPPK               | K | D | 95.00% | 32  |                 | 418.5639  | 3 | 5.9 | 239 | 248 | No  |
|     |                          |       |                                                                      | MSQYLDLTK                | K | V | 95.00% | 37  | M1: Oxidation   | 1100.5360 | 1 | 5.7 | 131 | 139 | No  |
|     |                          |       |                                                                      | MSQYLDLTK                | K | V | 95.00% | 32  | M1: Oxidation   | 550.7718  | 2 | 5.3 | 131 | 139 | No  |
|     |                          |       |                                                                      | PYTPVTSEDEQGYDLVIK       | R | V | 95.00% | 85  |                 | 713.6948  | 3 | 8.9 | 97  | 115 | No  |
|     |                          |       |                                                                      | RPQVTLDPNEK              | R | Y | 95.00% | 35  |                 | 705.3956  | 2 | 5.6 | 35  | 46  | No  |
|     |                          |       |                                                                      | RPQVTLDPNEK              | R | Y | 95.00% | 27  |                 | 470.6000  | 3 | 6.3 | 35  | 46  | No  |
|     |                          |       |                                                                      | VGDVVEFR                 | K | G | 95.00% | 36  |                 | 920.4932  | 1 | 9.8 | 140 | 147 | No  |
|     |                          |       |                                                                      | VGDVVEFR                 | K | G | 95.00% | 66  |                 | 460.7482  | 2 | 4.8 | 140 | 147 | No  |
| 518 | IPI00470829              | IMMT  | ISOFORM 3 OF MITOCHONDRIAL INNER MEMBRANE PROTEIN.                   | AVDEAADALLK              | K | A | 95.00% | 37  |                 | 1115.5960 | 1 | 1.2 | 255 | 265 | No  |
|     |                          |       |                                                                      | AVDEAADALLK              | K | A | 95.00% | 47  |                 | 558.3020  | 2 | 1.0 | 255 | 265 | Yes |
|     |                          |       |                                                                      | ELDSITPEVLPGWK           | R | G | 95.00% | 60  |                 | 792.4234  | 2 | 4.1 | 340 | 353 | Yes |
|     |                          |       |                                                                      | EVAGAKPHITAAEGK          | K | L | 95.00% | 29  |                 | 493.6058  | 3 | 3.3 | 284 | 298 | No  |
|     |                          |       |                                                                      | GIEQAVQSHAVAEAEAR        | R | K | 95.00% | 104 |                 | 912.4516  | 2 | 3.6 | 516 | 532 | Yes |
|     |                          |       |                                                                      | GIEQAVQSHAVAEAEAR        | R | K | 95.00% | 62  |                 | 608.6362  | 3 | 2.3 | 516 | 532 | Yes |
|     |                          |       |                                                                      | GMSVSDLADKLSTDDLNSLIAHA  |   |   |        |     |                 |           |   |     |     |     |     |
|     |                          |       |                                                                      | HR                       | K | R | 95.00% | 56  | M2: Oxidation   | 894.7826  | 3 | 6.2 | 354 | 378 | Yes |
|     |                          |       |                                                                      | GVYSEETLR                | R | A | 95.00% | 49  |                 | 527.2662  | 2 | 2.7 | 592 | 600 | Yes |
|     |                          |       |                                                                      | KAHQLWLSVEALK            | R | Y | 95.00% | 40  |                 | 508.2989  | 3 | 4.2 | 533 | 545 | Yes |
|     |                          |       |                                                                      | KAVDEAADALLK             | R | A | 95.00% | 84  |                 | 622.3502  | 2 | 2.1 | 254 | 265 | Yes |
|     |                          |       |                                                                      | LFEMVLGPAAAYNVPLPK       | K | K | 95.00% | 75  | M4: Oxidation   | 938.0121  | 2 | 3.9 | 85  | 101 | Yes |
|     |                          |       |                                                                      | LFEMVLGPAAAYNVPLPK       | K | K | 95.00% | 50  | M4: Oxidation   | 625.6768  | 3 | 3.0 | 85  | 101 | Yes |
|     |                          |       |                                                                      | LHNMIVLDNVVK             | K | K | 95.00% | 75  | M4: Oxidation   | 763.4110  | 2 | 6.2 | 299 | 311 | Yes |
|     |                          |       |                                                                      | LHNMIVLDNVVK             | K | K | 95.00% | 35  | M4: Oxidation   | 509.2776  | 3 | 8.0 | 299 | 311 | Yes |
|     |                          |       |                                                                      | LHNMIVLDNVVK             | K | V | 95.00% | 31  | M4: Oxidation   | 551.9732  | 3 | 2.5 | 299 | 312 | Yes |
|     |                          |       |                                                                      | LRGIEQAVQSHAVAEAEAR      | R | K | 95.00% | 61  |                 | 698.3663  | 3 | 4.4 | 514 | 532 | Yes |
|     |                          |       |                                                                      | LRGIEQAVQSHAVAEAEAR      | R | K | 95.00% | 52  |                 | 524.0265  | 4 | 4.1 | 514 | 532 | Yes |
|     |                          |       |                                                                      | LSEQELQFR                | K | R | 95.00% | 65  |                 | 575.3000  | 2 | 1.5 | 485 | 493 | No  |
|     |                          |       |                                                                      | LSQEQVDNFTLDINTAYAR      | R | L | 95.00% | 124 |                 | 1099.5470 | 2 | 6.0 | 495 | 513 | Yes |
|     |                          |       |                                                                      | LSQEQVDNFTLDINTAYAR      | R | L | 95.00% | 55  |                 | 733.3662  | 3 | 4.6 | 495 | 513 | Yes |
|     |                          |       |                                                                      | LSTDDLNSLIAHAHR          | K | R | 95.00% | 35  |                 | 416.4715  | 4 | 3.7 | 364 | 378 | Yes |
|     |                          |       |                                                                      | QTASVTLQAIAQNAAVQAVNA    |   |   |        |     |                 |           |   |     |     |     |     |
|     |                          |       |                                                                      | HSNILK                   | R | A | 95.00% | 83  |                 | 944.8533  | 3 | 4.1 | 198 | 225 | Yes |
|     |                          |       |                                                                      | QTASVTLQAIAQNAAVQAVNA    |   |   |        |     |                 |           |   |     |     |     |     |
|     |                          |       |                                                                      | HSNILK                   | R | A | 95.00% | 45  |                 | 708.8920  | 4 | 4.1 | 198 | 225 | Yes |
|     |                          |       |                                                                      | SEFEQNLSEK               | K | L | 95.00% | 39  |                 | 605.7842  | 2 | 1.2 | 475 | 484 | Yes |
|     |                          |       |                                                                      | TDHPEIGEGKPTPALSALAK     | K | S | 95.00% | 44  |                 | 678.0348  | 3 | 8.4 | 171 | 190 | No  |
|     |                          |       |                                                                      | TIPYSDKLFEMVLGPAAAYNVPLP |   |   |        |     |                 |           |   |     |     |     |     |
|     |                          |       |                                                                      | K                        | K | K | 95.00% | 34  | M11: Oxidation  | 893.8137  | 3 | 5.6 | 78  | 101 | Yes |
|     |                          |       |                                                                      | TSSAETPTIPLGSAVEAIK      | K | A | 95.00% | 99  |                 | 936.5066  | 2 | 4.7 | 550 | 568 | Yes |
|     |                          |       |                                                                      | TSSAETPTIPLGSAVEAIK      | K | A | 95.00% | 36  |                 | 624.6743  | 3 | 5.7 | 550 | 568 | No  |
|     |                          |       |                                                                      | VAMIDETR                 | R | N | 95.00% | 45  | M3: Oxidation   | 475.7369  | 2 | 4.4 | 613 | 620 | Yes |
|     |                          |       |                                                                      | VQEQLKSEFEQNLSEK         | R | L | 95.00% | 104 |                 | 1033.0120 | 2 | 4.0 | 468 | 484 | Yes |
|     |                          |       |                                                                      | VQEQLKSEFEQNLSEK         | R | L | 95.00% | 73  |                 | 689.0098  | 3 | 2.4 | 468 | 484 | Yes |
|     |                          |       |                                                                      | VVSQYHELIVQAR            | K | D | 95.00% | 96  |                 | 764.4203  | 2 | 3.0 | 322 | 334 | Yes |
|     |                          |       |                                                                      | VVSQYHELIVQAR            | K | D | 95.00% | 49  |                 | 509.9509  | 3 | 5.8 | 322 | 334 | Yes |
|     |                          |       |                                                                      | YSTSGSSGLTTGK            | R | I | 95.00% | 61  |                 | 623.3045  | 2 | 3.9 | 33  | 45  | Yes |
| 519 | IPI00472102; IPI00784154 | HSPD1 | 61 KDA PROTEIN.; 60 KDA HEAT SHOCK PROTEIN, MITOCHONDRIAL PRECURSOR. | ALMLQGVLLADAVAVTMGPK     | R | G | 95.00% | 113 | M3: Oxidation,  | 1073.0770 | 2 | 7.4 | 38  | 58  | No  |
|     |                          |       |                                                                      | ALMLQGVLLADAVAVTMGPK     | R | G | 95.00% | 101 | M18: Oxidation  | 715.7195  | 3 | 5.9 | 38  | 58  | No  |

|     |             |          |                                                  |                         |   |   |        |     |                                                     |           |   |     |     |     |     |
|-----|-------------|----------|--------------------------------------------------|-------------------------|---|---|--------|-----|-----------------------------------------------------|-----------|---|-----|-----|-----|-----|
|     |             |          |                                                  | ALMLQGVDLLADAVAVTMGPK   | R | G | 95.00% | 84  |                                                     | 705.0566  | 3 | 6.5 | 38  | 58  | No  |
|     |             |          |                                                  | DMAIATGGAVFGEEGLTLNLEDV |   |   |        |     |                                                     |           |   |     |     |     |     |
|     |             |          |                                                  | QPHDLGK                 | K | V | 95.00% | 78  | M2: Oxidation                                       | 1038.5180 | 3 | 8.9 | 317 | 346 | No  |
|     |             |          |                                                  | GANPVEIR                | K | R | 95.00% | 48  |                                                     | 428.2406  | 2 | 5.3 | 134 | 141 | No  |
|     |             |          |                                                  | GVMLAVDAVIAELKK         | R | Q | 95.00% | 71  | M3: Oxidation                                       | 786.9633  | 2 | 9.6 | 143 | 157 | No  |
|     |             |          |                                                  | GVMLAVDAVIAELKK         | R | Q | 95.00% | 46  | M3: Oxidation                                       | 524.9763  | 3 | 6.1 | 143 | 157 | No  |
|     |             |          |                                                  | GYISPYFINTSK            | R | G | 95.00% | 71  |                                                     | 695.3593  | 2 | 3.9 | 222 | 233 | No  |
|     |             |          |                                                  | IGIEIHKR                | K | T | 95.00% | 46  |                                                     | 471.3127  | 2 | 2.9 | 463 | 470 | No  |
|     |             |          |                                                  |                         |   |   |        |     | M2: Oxidation,<br>M13: Oxidation,<br>M20: Oxidation |           |   |     |     |     |     |
|     |             |          |                                                  | IMQSSSEVGYDAMAGDFVMVE   |   |   |        |     |                                                     | 852.7108  | 3 | 8.9 | 496 | 518 | No  |
|     |             |          |                                                  | K                       | K | G | 95.00% | 57  |                                                     | 1019.5240 | 2 | 8.1 | 373 | 389 | No  |
|     |             |          |                                                  | IQEIIIEQLDVTTSEYEK      | R | E | 95.00% | 151 |                                                     | 1148.0960 | 2 | 9.8 | 373 | 391 | No  |
|     |             |          |                                                  | IQEIIIEQLDVTTSEYEKEK    | R | L | 95.00% | 114 |                                                     | 765.7300  | 3 | 6.0 | 373 | 391 | No  |
|     |             |          |                                                  | IQEIIIEQLDVTTSEYEKEK    | R | L | 95.00% | 56  |                                                     | 960.0488  | 2 | 9.5 | 251 | 268 | No  |
|     |             |          |                                                  | ISSIQSIVPALEIANAHR      | K | K | 95.00% | 94  |                                                     | 640.3668  | 3 | 6.9 | 253 | 270 | No  |
|     |             |          |                                                  | ISSIQSIVPALEIANAHR      | K | K | 95.00% | 60  |                                                     | 683.0656  | 3 | 7.1 | 252 | 270 | No  |
|     |             |          |                                                  | KISSIQSIVPALEIANAHR     | K | K | 95.00% | 72  |                                                     | 512.5516  | 4 | 7.9 | 252 | 270 | No  |
|     |             |          |                                                  | KISSIQSIVPALEIANAHR     | K | K | 95.00% | 39  |                                                     | 1183.1800 | 2 | 7.9 | 269 | 290 | No  |
|     |             |          |                                                  | KPLVIIAEDVDGALSTLVNLR   | R | L | 95.00% | 163 |                                                     | 789.1215  | 3 | 6.1 | 269 | 290 | No  |
|     |             |          |                                                  | KPLVIIAEDVDGALSTLVNLR   | R | L | 95.00% | 29  |                                                     | 592.0934  | 4 | 6.7 | 271 | 292 | No  |
|     |             |          |                                                  | KPLVIIAEDVDGALSTLVNLR   | R | L | 95.00% | 38  |                                                     | 577.3901  | 2 | 4.2 | 291 | 301 | No  |
|     |             |          |                                                  | LKVGLQVVAVK             | R | A | 95.00% | 36  |                                                     | 451.2741  | 2 | 4.9 | 399 | 407 | No  |
|     |             |          |                                                  | LSDGVAVK                | K | V | 95.00% | 52  |                                                     | 1280.6400 | 2 | 9.1 | 97  | 121 | No  |
|     |             |          |                                                  | LVQDVANNTNEEAGDGTATV    |   |   |        |     |                                                     |           |   |     |     |     |     |
|     |             |          |                                                  | LAR                     | K | S | 95.00% | 182 |                                                     | 854.0891  | 3 | 1.0 | 97  | 121 | No  |
|     |             |          |                                                  | LVQDVANNTNEEAGDGTATV    |   |   |        |     |                                                     |           |   |     |     |     |     |
|     |             |          |                                                  | LAR                     | K | S | 95.00% | 77  |                                                     | 608.3386  | 2 | 8.8 | 484 | 495 | No  |
|     |             |          |                                                  | NAGVEGSLIVEK            | K | I | 95.00% | 75  |                                                     |           |   |     |     |     |     |
|     |             |          |                                                  | NQLKDMAIATGGAVFGEEGLTL  |   |   |        |     |                                                     |           |   |     |     |     |     |
|     |             |          |                                                  | NLEDVQPHDLGK            | K | V | 95.00% | 81  | M6: Oxidation                                       | 899.9621  | 4 | 9.4 | 313 | 346 | No  |
|     |             |          |                                                  | RGVMLAVDAVIAELKK        | R | Q | 95.00% | 70  | M4: Oxidation                                       | 577.0123  | 3 | 9.5 | 142 | 157 | No  |
|     |             |          |                                                  | RIQEIIIEQLDVTTSEYEKEK   | K | L | 95.00% | 88  |                                                     | 817.7660  | 3 | 8.3 | 372 | 391 | No  |
|     |             |          |                                                  | TALLDAAGVASLLTAEVVTEIP  |   |   |        |     |                                                     |           |   |     |     |     |     |
|     |             |          |                                                  | KEEK                    | R | D | 95.00% | 58  |                                                     | 956.8735  | 3 | 8.0 | 527 | 554 | No  |
|     |             |          |                                                  |                         |   |   |        |     |                                                     |           |   |     |     |     |     |
|     |             |          |                                                  | TALLDAAGVASLLTAEVVTEIP  |   |   |        |     |                                                     |           |   |     |     |     |     |
|     |             |          |                                                  | KEEKDPGMGAMGGMGGMGGMG   |   |   |        |     |                                                     |           |   |     |     |     |     |
|     |             |          |                                                  | GMF                     | R | - | 95.00% | 45  | M46: Oxidation                                      | 1151.8060 | 4 | 9.1 | 529 | 575 | No  |
|     |             |          |                                                  | TLNDELEIIIEGKMFDR       | K | G | 95.00% | 70  | M12: Oxidation                                      | 969.9865  | 2 | 8.6 | 206 | 221 | No  |
|     |             |          |                                                  | TLNDELEIIIEGKMFDR       | K | G | 95.00% | 56  | M12: Oxidation                                      | 646.9933  | 3 | 8.2 | 208 | 223 | No  |
|     |             |          |                                                  | TVIIIEQSWGSPK           | R | V | 95.00% | 76  |                                                     | 672.8665  | 2 | 6.4 | 61  | 72  | No  |
|     |             |          |                                                  | VGEVIVTK                | K | D | 95.00% | 37  |                                                     | 844.5228  | 1 | 9.8 | 347 | 354 | No  |
|     |             |          |                                                  | VGEVIVTK                | K | D | 95.00% | 64  |                                                     | 422.7628  | 2 | 3.8 | 347 | 354 | No  |
|     |             |          |                                                  | VGEVIVTKDDAMLLK         | K | G | 95.00% | 66  | M12: Oxidation                                      | 823.9568  | 2 | 1.0 | 345 | 359 | No  |
|     |             |          |                                                  | VGEVIVTKDDAMLLK         | K | G | 95.00% | 45  | M12: Oxidation                                      | 549.6431  | 3 | 5.9 | 347 | 361 | No  |
|     |             |          |                                                  | VGLQVVAVK               | K | A | 95.00% | 32  |                                                     | 912.5928  | 1 | 4.9 | 295 | 303 | No  |
|     |             |          |                                                  | VGLQVVAVK               | K | A | 95.00% | 74  |                                                     | 456.7991  | 2 | 2.3 | 293 | 301 | No  |
|     |             |          |                                                  | VTDALNATR               | R | A | 95.00% | 49  |                                                     | 480.7620  | 2 | 5.1 | 421 | 429 | No  |
| 520 | IPI00472442 | PSMA1    | ISOFORM LONG OF PROTEASOME SUBUNIT ALPHA TYPE 1. | IHQIEYAMEAVK            | R | Q | 95.00% | 30  | M8: Oxidation                                       | 724.3702  | 2 | 4.8 | 25  | 36  | No  |
|     |             |          |                                                  | ILHVDNHIGISIAGLTADAR    | K | L | 95.00% | 30  |                                                     | 522.2949  | 4 | 7.1 | 69  | 88  | No  |
|     |             |          |                                                  | LVSLIGSK                | R | T | 95.00% | 27  |                                                     | 816.5256  | 1 | 7.3 | 114 | 121 | No  |
|     |             |          |                                                  | NVSIGIVGK               | K | D | 95.00% | 29  |                                                     | 443.7744  | 2 | 5.2 | 215 | 223 | No  |
|     |             |          |                                                  | THAVLVALK               | K | R | 95.00% | 22  |                                                     | 476.3060  | 2 | 5.2 | 48  | 56  | No  |
| 521 | IPI00473011 | HBB; HBD | HEMOGLOBIN SUBUNIT DELTA.                        | EFTPQMQAAYQK            | K | V | 95.00% | 66  | M6: Oxidation                                       | 729.3459  | 2 | 7.1 | 122 | 133 | No  |
|     |             |          |                                                  | EFTPQMQAAYQK            | K | V | 95.00% | 57  |                                                     | 721.3474  | 2 | 5.7 | 122 | 133 | No  |
|     |             |          |                                                  | FFESFGDLSSPDAMVGNPK     | R | V | 95.00% | 103 | M15: Oxidation                                      | 1030.9770 | 2 | 9.2 | 42  | 60  | No  |
|     |             |          |                                                  | FFESFGDLSSPDAMVGNPK     | R | V | 95.00% | 48  | M15: Oxidation                                      | 687.6533  | 3 | 8.1 | 42  | 60  | No  |
|     |             |          |                                                  | FFESFGDLSSPDAMVGNPK     | R | V | 95.00% | 83  |                                                     | 1022.9780 | 2 | 7.5 | 42  | 60  | No  |
|     |             |          |                                                  | FFESFGDLSSPDAMVGNPK     | R | V | 95.00% | 59  |                                                     | 682.3179  | 3 | 2.5 | 42  | 60  | No  |
|     |             |          |                                                  | KVLGAFSDGLAHLNLIK       | K | G | 95.00% | 129 |                                                     | 899.5036  | 2 | 7.2 | 67  | 83  | Yes |
|     |             |          |                                                  | KVLGAFSDGLAHLNLIK       | K | G | 95.00% | 81  |                                                     | 600.0053  | 3 | 7.7 | 67  | 83  | Yes |
|     |             |          |                                                  | KVLGAFSDGLAHLNLIK       | K | G | 95.00% | 41  |                                                     | 450.2552  | 4 | 6.0 | 67  | 83  | Yes |
|     |             |          |                                                  | LHVDPENFR               | K | L | 95.00% | 33  |                                                     | 1126.5750 | 1 | 9.2 | 97  | 105 | Yes |
|     |             |          |                                                  | LHVDPENFR               | K | L | 95.00% | 56  |                                                     | 563.7872  | 2 | 1.7 | 97  | 105 | Yes |
|     |             |          |                                                  | LLVVYPWTQR              | R | F | 95.00% | 31  |                                                     | 1274.7390 | 1 | 9.8 | 32  | 41  | Yes |
|     |             |          |                                                  | LLVVYPWTQR              | R | F | 95.00% | 71  |                                                     | 637.8707  | 2 | 5.7 | 32  | 41  | Yes |
|     |             |          |                                                  | LLVVYPWTQR              | R | F | 95.00% | 40  |                                                     | 425.5841  | 3 | 8.3 | 32  | 41  | Yes |

|     |                                                                                                                     |         |                                                                                                                                                                                                 |                       |   |        |        |           |          |      |     |     |     |    |
|-----|---------------------------------------------------------------------------------------------------------------------|---------|-------------------------------------------------------------------------------------------------------------------------------------------------------------------------------------------------|-----------------------|---|--------|--------|-----------|----------|------|-----|-----|-----|----|
|     |                                                                                                                     |         | TAVNALWGK                                                                                                                                                                                       | K                     | V | 95.00% | 35     | 959.5367  | 1        | 5.5  | 10  | 18  | No  |    |
|     |                                                                                                                     |         | TAVNALWGK                                                                                                                                                                                       | K                     | V | 95.00% | 73     | 480.2740  | 2        | 9.2  | 10  | 18  | No  |    |
|     |                                                                                                                     |         | VHLTPEEK                                                                                                                                                                                        | M                     | T | 95.00% | 36     | 952.5192  | 1        | 9.2  | 2   | 9   | No  |    |
|     |                                                                                                                     |         | VHLTPEEK                                                                                                                                                                                        | M                     | T | 95.00% | 39     | 476.7600  | 2        | 1.8  | 2   | 9   | No  |    |
|     |                                                                                                                     |         | VLGAFSDGLAHLNLIK                                                                                                                                                                                | K                     | G | 95.00% | 137    | 835.4454  | 2        | -5.0 | 68  | 83  | Yes |    |
|     |                                                                                                                     |         | VLGAFSDGLAHLNLIK                                                                                                                                                                                | K                     | G | 95.00% | 66     | 557.3033  | 3        | 1.8  | 68  | 83  | Yes |    |
|     |                                                                                                                     |         | VNVDAVGGEALGR                                                                                                                                                                                   | K                     | L | 95.00% | 105    | 628.8386  | 2        | 7.5  | 19  | 31  | No  |    |
|     |                                                                                                                     |         | VNVDAVGGEALGR                                                                                                                                                                                   | K                     | L | 95.00% | 35     | 419.5598  | 3        | 3.2  | 19  | 31  | No  |    |
|     |                                                                                                                     |         | VVAGVANALAHK                                                                                                                                                                                    | K                     | Y | 95.00% | 49     | 1149.6820 | 1        | 6.8  | 134 | 145 | Yes |    |
|     |                                                                                                                     |         | VVAGVANALAHK                                                                                                                                                                                    | K                     | Y | 95.00% | 92     | 575.3436  | 2        | 4.4  | 134 | 145 | Yes |    |
|     |                                                                                                                     |         | VVAGVANALAHKYH                                                                                                                                                                                  | K                     | - | 95.00% | 64     | 725.4076  | 2        | 7.5  | 134 | 147 | Yes |    |
|     |                                                                                                                     |         | IGHM PROTEIN.; IGHM PROTEIN.                                                                          |                       |   |        |        |           |          |      |     |     |     |    |
| 522 | IPI00477090; IPI00479708; IPI00549291; IPI00828205; IPI00829729; IPI00829768; IPI00829843; IPI00829854; IPI00829911 | IGHM    | DGFFGNPR                                                                                                                                                                                        | R                     | K | 95.00% | 33     | 455.2149  | 2        | 0.1  | 260 | 267 | No  |    |
|     |                                                                                                                     |         | GVALHRPDVYLLPPAR                                                                                                                                                                                | K                     | E | 95.00% | 45     | 887.5185  | 2        | 9.2  | 462 | 477 | No  |    |
|     |                                                                                                                     |         | GVALHRPDVYLLPPAR                                                                                                                                                                                | K                     | E | 95.00% | 40     | 592.0138  | 3        | 7.3  | 462 | 477 | No  |    |
|     |                                                                                                                     |         | NSLYLQMNLSR                                                                                                                                                                                     | K                     | A | 95.00% | 62     | 677.8459  | 2        | 3.7  | 96  | 106 | Yes |    |
|     |                                                                                                                     |         | NTLYLQMNLSR                                                                                                                                                                                     | K                     | A | 95.00% | 36     | 684.8559  | 2        | 6.9  | 96  | 106 | Yes |    |
|     |                                                                                                                     |         | QIQVSWLR                                                                                                                                                                                        | R                     | E | 95.00% | 39     | 515.2988  | 2        | 5.0  | 282 | 289 | No  |    |
|     |                                                                                                                     |         | QVGSVTTDQVQAEAK                                                                                                                                                                                 | K                     | E | 95.00% | 105    | 809.4116  | 2        | 4.2  | 293 | 308 | No  |    |
|     |                                                                                                                     |         | VFAIPPSFASIFLTK                                                                                                                                                                                 | R                     | S | 95.00% | 26     | 819.4765  | 2        | 8.8  | 377 | 391 | No  |    |
|     |                                                                                                                     |         | YSVFVPPR                                                                                                                                                                                        | K                     | D | 95.00% | 49     | 450.7705  | 2        | 2.8  | 252 | 259 | No  |    |
|     |                                                                                                                     |         | YAATSQVLLPSK                                                                                                                                                                                    | K                     | D | 95.00% | 66     | 639.3611  | 2        | 2.9  | 218 | 229 | No  |    |
|     |                                                                                                                     |         | YVTSAPMPEQPAPGR                                                                                                                                                                                 | K                     | Y | 95.00% | 71     | 808.8957  | 2        | 5.7  | 516 | 530 | No  |    |
| 523 | IPI00477131                                                                                                         | SYPL2   | ISOFORM 1 OF SYNAPTOPHYSIN-LIKE PROTEIN 2.                                                                                                                                                      | DVSSIIVAFGYPPFR       | K | L      | 95.00% | 51        | 524.2853 | 3    | 8.4 | 72  | 85  | No |
|     |                                                                                                                     |         |                                                                                                                                                                                                 | ETPWHLGGQGGQQDQDQDQDQ | K | -      | 95.00% | 41        | 963.4250 | 4    | 9.1 | 236 | 271 | No |
|     |                                                                                                                     |         |                                                                                                                                                                                                 | QGSPQESAAEQGAVEK      | R | V      | 95.00% | 42        | 523.3037 | 2    | 5.7 | 31  | 39  | No |
|     |                                                                                                                     |         |                                                                                                                                                                                                 | LEEPLGFIK             | R | V      | 95.00% | 42        | 523.3037 | 2    | 5.7 | 31  | 39  | No |
| 524 | IPI00375704; IPI00479306                                                                                            | PSMB5   | HYPOTHETICAL PROTEIN DKFZP686I0180 (FRAGMENT); PROTEASOME BETA 5 SUBUNIT.                                                                                                                       | ATAGAYIASQTVK         | R | K      | 95.00% | 34        | 640.8504 | 2    | 6.2 | 79  | 91  | No |
|     |                                                                                                                     |         |                                                                                                                                                                                                 | GPGLYYVDSEGNR         | R | I      | 95.00% | 40        | 713.8405 | 2    | 9.0 | 170 | 182 | No |
|     |                                                                                                                     |         |                                                                                                                                                                                                 | HGVIVAADSR            | R | A      | 95.00% | 33        | 512.7841 | 2    | 6.2 | 72  | 81  | No |
|     |                                                                                                                     |         |                                                                                                                                                                                                 | LLANMVYQYK            | K | G      | 95.00% | 67        | 629.8337 | 2    | 7.3 | 141 | 150 | No |
|     |                                                                                                                     |         |                                                                                                                                                                                                 | RAIYQATYR             | R | D      | 95.00% | 31        | 571.3122 | 2    | 4.1 | 220 | 228 | No |
|     |                                                                                                                     |         |                                                                                                                                                                                                 | RGPGLYYVDSEGNR        | K | I      | 95.00% | 42        | 528.2618 | 3    | 5.3 | 166 | 179 | No |
| 525 | IPI00479877                                                                                                         | ALDH9A1 | ALDEHYDE DEHYDROGENASE 9A1.                                                                                                                                                                     | ANDTTFFLAGAVFTR       | R | D      | 95.00% | 93        | 770.8959 | 2    | 5.1 | 436 | 450 | No |
|     |                                                                                                                     |         |                                                                                                                                                                                                 | EILDKFTEEVVK          | K | Q      | 95.00% | 53        | 725.4003 | 2    | 5.9 | 323 | 334 | No |
|     |                                                                                                                     |         |                                                                                                                                                                                                 | EVNLAQVNAK            | K | A      | 95.00% | 54        | 543.3033 | 2    | 3.0 | 74  | 83  | No |
|     |                                                                                                                     |         |                                                                                                                                                                                                 | GIKPVTLELGK           | K | S      | 95.00% | 68        | 606.3749 | 2    | 4.3 | 271 | 282 | No |
|     |                                                                                                                     |         |                                                                                                                                                                                                 | GIKPVTLELGK           | K | S      | 95.00% | 42        | 404.5857 | 3    | 3.8 | 271 | 282 | No |
|     |                                                                                                                     |         |                                                                                                                                                                                                 | IGDPLLEDTR            | K | M      | 95.00% | 92        | 564.8020 | 2    | 5.2 | 341 | 350 | No |
|     |                                                                                                                     |         |                                                                                                                                                                                                 | VSFTGSVPTGMK          | K | I      | 95.00% | 50        | 613.8107 | 2    | 3.6 | 252 | 263 | No |
|     |                                                                                                                     |         |                                                                                                                                                                                                 | VTIEYYSQLK            | R | T      | 95.00% | 69        | 622.3358 | 2    | 5.1 | 496 | 505 | No |
| 526 | IPI00479905                                                                                                         | NDUFB10 | NADH DEHYDROGENASE [UBIQUINONE] 1 BETA SUBCOMPLEX SUBUNIT 10.                                                                                                                                   | AFDLIVDRPVTLVR        | K | E      | 95.00% | 45        | 807.4802 | 2    | 9.0 | 30  | 43  | No |
|     |                                                                                                                     |         |                                                                                                                                                                                                 | AFDLIVDRPVTLVR        | K | E      | 95.00% | 58        | 538.6548 | 3    | 6.7 | 30  | 43  | No |
|     |                                                                                                                     |         |                                                                                                                                                                                                 | DYKVDQEIINMQDR        | R | L      | 95.00% | 63        | 948.4691 | 2    | 6.8 | 89  | 103 | No |
|     |                                                                                                                     |         |                                                                                                                                                                                                 | TPVQPNPIVYMMK         | R | A      | 95.00% | 57        | 775.3992 | 2    | 9.4 | 17  | 29  | No |
|     |                                                                                                                     |         |                                                                                                                                                                                                 | VDQEIINMQDR           | K | L      | 95.00% | 56        | 745.3766 | 2    | 8.8 | 92  | 103 | No |
|     |                                                                                                                     |         |                                                                                                                                                                                                 | YQDLGAYSSAR           | R | K      | 95.00% | 51        | 615.7955 | 2    | 6.2 | 137 | 147 | No |
| 527 | IPI00513979                                                                                                         | SEPW1   | SELENOPROTEIN W.                                                                                                                                                                                | KKLEDEFPPGR           | K | L      | 95.00% | 29        | 609.8325 | 2    | 7.0 | 26  | 35  | No |
|     |                                                                                                                     |         |                                                                                                                                                                                                 | KLEDEFPPGR            | K | L      | 95.00% | 53        | 545.7827 | 2    | 3.6 | 27  | 35  | No |
|     |                                                                                                                     |         |                                                                                                                                                                                                 | LEDEFPPGR             | K | L      | 95.00% | 50        | 481.7351 | 2    | 4.1 | 28  | 35  | No |
| 528 | IPI00549467                                                                                                         | NIT2    | NITRILASE FAMILY MEMBER 2.                                                                                                                                                                      | AVDNQVYVATASPAR       | R | D      | 95.00% | 83        | 781.4092 | 2    | 8.4 | 196 | 210 | No |
|     |                                                                                                                     |         |                                                                                                                                                                                                 | FAELAQIYQR            | R | G      | 95.00% | 42        | 655.3531 | 2    | 6.0 | 158 | 168 | No |
|     |                                                                                                                     |         |                                                                                                                                                                                                 | LALIQLQISSIK          | R | S      | 95.00% | 82        | 663.9279 | 2    | 8.8 | 6   | 17  | No |
|     |                                                                                                                     |         | ISOFORM 1 OF PYRUVATE DEHYDROGENASE E1 COMPONENT SUBUNIT BETA,MITOCHONDRIAL PRECURSOR.; ISOFORM 2 OF PYRUVATE DEHYDROGENASE E1 COMPONENT SUBUNIT BETA,MITOCHONDRIAL PRECURSOR.; 35 KDA PROTEIN. | DAINQGMDEELER         | R | D      | 95.00% | 67        | 768.3429 | 2    | 8.5 | 19  | 31  | No |
| 529 | IPI00003925; IPI00549885; IPI00798351                                                                               | PDHB    |                                                                                                                                                                                                 | DAINQGMDEELERDEK      | R | V      | 95.00% | 44        | 954.4210 | 2    | 2.4 | 37  | 52  | No |
|     |                                                                                                                     |         |                                                                                                                                                                                                 | DFLIPIGK              | K | A      | 95.00% | 36        | 902.5400 | 1    | 5.2 | 220 | 227 | No |
|     |                                                                                                                     |         |                                                                                                                                                                                                 | DFLIPIGK              | K | A      | 95.00% | 47        | 451.7743 | 2    | 6.0 | 202 | 209 | No |

|     |                          |          |                                                             |                        |   |   |        |     |                                                              |           |   |     |     |     |    |
|-----|--------------------------|----------|-------------------------------------------------------------|------------------------|---|---|--------|-----|--------------------------------------------------------------|-----------|---|-----|-----|-----|----|
|     |                          |          |                                                             | DIIFAIK                | K | K | 95.00% | 35  |                                                              | 410.2556  | 2 | 6.3 | 330 | 336 | No |
|     |                          |          |                                                             | DIIFAIKK               | K | T | 95.00% | 36  |                                                              | 474.3024  | 2 | 4.0 | 348 | 355 | No |
|     |                          |          |                                                             | ILEDNSIPQVK            | K | D | 95.00% | 67  |                                                              | 628.3513  | 2 | 3.8 | 337 | 347 | No |
|     |                          |          |                                                             | IMEGPAFNFLDAPAVR       | R | V | 95.00% | 83  | M2: Oxidation                                                | 882.4519  | 2 | 9.5 | 309 | 324 | No |
|     |                          |          |                                                             | IMEGPAFNFLDAPAVR       | R | V | 95.00% | 40  | M2: Oxidation                                                | 588.6358  | 3 | 7.1 | 291 | 306 | No |
|     |                          |          |                                                             | IMEGPAFNFLDAPAVR       | R | V | 95.00% | 93  |                                                              | 874.4545  | 2 | 9.6 | 309 | 324 | No |
|     |                          |          |                                                             | IMEGPAFNFLDAPAVR       | R | V | 95.00% | 54  |                                                              | 583.3027  | 3 | 4.7 | 309 | 324 | No |
|     |                          |          |                                                             |                        |   |   |        |     | M5: Oxidation, M7: Oxidation, M15: Oxidation                 | 950.4519  | 2 | 4.9 | 270 | 285 | No |
|     |                          |          |                                                             | TIRPMDMETIEASVMK       | R | T | 95.00% | 46  | M5: Oxidation, M7: Oxidation, M15: Oxidation                 | 633.9725  | 3 | 8.0 | 252 | 267 | No |
|     |                          |          |                                                             | TIRPMDMETIEASVMK       | R | T | 95.00% | 55  |                                                              | 617.9770  | 3 | 7.1 | 270 | 285 | No |
|     |                          |          |                                                             | TIRPMDMETIEASVMK       | R | T | 95.00% | 59  |                                                              | 922.4836  | 2 | 9.7 | 130 | 145 | No |
|     |                          |          |                                                             | TYMSGGLQPVPIVFR        | K | G | 95.00% | 84  | M4: Oxidation                                                | 901.4633  | 2 | 9.6 | 53  | 68  | No |
|     |                          |          |                                                             | VLLGEEVAQYDGAYK        | K | V | 95.00% | 103 |                                                              | 601.3103  | 3 | 7.7 | 35  | 50  | No |
|     |                          |          |                                                             | VLLGEEVAQYDGAYK        | K | V | 95.00% | 78  |                                                              | 632.8210  | 2 | 7.3 | 307 | 318 | No |
|     |                          |          |                                                             | VTGADVPMPIYAK          | R | I | 95.00% | 73  | M8: Oxidation                                                | 616.3054  | 2 | 5.7 | 174 | 184 | No |
|     |                          |          |                                                             | VVSPWNSEDAK            | K | G | 95.00% | 36  |                                                              |           |   |     |     |     |    |
| 530 | IPI00550069; IPI00783491 | RNH1     | RIBONUCLEASE INHIBITOR.; RIBONUCLEASE/ANGIOGENIN INHIBITOR. | ELSLAGNELGDEGAR        | K | L | 95.00% | 110 |                                                              | 765.8784  | 2 | 5.7 | 288 | 302 | No |
|     |                          |          |                                                             | ELTVSNNDINEAGVR        | K | V | 95.00% | 115 |                                                              | 815.9097  | 2 | 4.9 | 174 | 188 | No |
|     |                          |          |                                                             | ESLKELSLAGNELGDEGAR    | K | L | 95.00% | 49  |                                                              | 663.3410  | 3 | 6.8 | 284 | 302 | No |
|     |                          |          |                                                             | VNPALAEINLR            | R | S | 95.00% | 87  |                                                              | 605.3575  | 2 | 9.6 | 54  | 64  | No |
| 531 | IPI00550165              | DHRS7B   | DEHYDROGENASE/REDUCTASE (SDR FAMILY) MEMBER 7B.             | SPVEVAQDVLAAVGK        | R | K | 95.00% | 60  |                                                              | 494.9490  | 3 | 9.8 | 268 | 282 | No |
|     |                          |          |                                                             | YGVMDTTTAQGR           | R | S | 95.00% | 69  | M4: Oxidation                                                | 658.3072  | 2 | 8.5 | 256 | 267 | No |
| 532 | IPI00550239              | H1F0     | HISTONE H1.0.                                               | LVTITGVLK              | R | Q | 95.00% | 23  |                                                              | 415.7752  | 2 | 8.7 | 75  | 82  | No |
|     |                          |          |                                                             | YSDMIVAAIQAEK          | K | N | 95.00% | 63  | M4: Oxidation                                                | 727.8704  | 2 | 8.8 | 28  | 40  | No |
| 533 | IPI00551024              | DAK      | DIHYDROXYACETONE KINASE.                                    | SPGADLLQLVTK           | K | A | 95.00% | 70  |                                                              | 621.3645  | 2 | 8.4 | 511 | 522 | No |
| 534 | IPI00553177              | SERPINA1 | ALPHA-1-ANTITRYPSIN PRECURSOR.                              | VAPAEQEPDSTAAGGSASK    | R | R | 95.00% | 63  |                                                              | 970.9680  | 2 | 4.0 | 352 | 372 | No |
|     |                          |          |                                                             | AVLTIDEK               | K | G | 95.00% | 38  |                                                              | 888.5082  | 1 | 4.3 | 360 | 367 | No |
|     |                          |          |                                                             | AVLTIDEK               | K | G | 95.00% | 39  |                                                              | 444.7574  | 2 | 3.0 | 360 | 367 | No |
|     |                          |          |                                                             | DTEEEEDFHVQVTTVK       | K | V | 95.00% | 110 |                                                              | 946.4396  | 2 | 7.9 | 226 | 241 | No |
|     |                          |          |                                                             | DTEEEEDFHVQVTTVK       | K | V | 95.00% | 34  |                                                              | 631.2950  | 3 | 7.0 | 226 | 241 | No |
|     |                          |          |                                                             | ELDRDVFALVNYIFFK       | K | G | 95.00% | 76  |                                                              | 1045.5590 | 2 | 6.4 | 199 | 215 | No |
|     |                          |          |                                                             | ELDRDVFALVNYIFFK       | K | G | 95.00% | 57  |                                                              | 697.3733  | 3 | 4.0 | 199 | 215 | No |
|     |                          |          |                                                             | FLEDVKK                | K | L | 95.00% | 30  |                                                              | 439.7553  | 2 | 4.5 | 154 | 160 | No |
|     |                          |          |                                                             | FNKPFVFLMIEQNTK        | K | S | 95.00% | 43  | M9: Oxidation                                                | 936.4980  | 2 | 8.1 | 390 | 404 | No |
|     |                          |          |                                                             | FNKPFVFLMIEQNTK        | K | S | 95.00% | 34  | M9: Oxidation                                                | 624.6659  | 3 | 4.9 | 390 | 404 | No |
|     |                          |          |                                                             | GTEAAGAMFLEAIPMSIPPEVK | K | F | 95.00% | 72  | M8: Oxidation, M15: Oxidation, M8: Oxidation, M15: Oxidation | 1146.0800 | 2 | 9.3 | 368 | 389 | No |
|     |                          |          |                                                             | GTEAAGAMFLEAIPMSIPPEVK | K | F | 95.00% | 52  |                                                              | 764.3874  | 3 | 6.9 | 368 | 389 | No |
|     |                          |          |                                                             | ITPNLAEFAPSLYR         | K | Q | 95.00% | 82  |                                                              | 821.4410  | 2 | 6.2 | 50  | 63  | No |
|     |                          |          |                                                             | ITPNLAEFAPSLYR         | K | Q | 95.00% | 65  |                                                              | 547.9627  | 3 | 5.1 | 50  | 63  | No |
|     |                          |          |                                                             | KLYHSEAFVNFQDTEEA      | K | Q | 95.00% | 58  |                                                              | 772.0527  | 3 | 3.1 | 160 | 179 | No |
|     |                          |          |                                                             | LQHLENELTHDIITK        | K | F | 95.00% | 96  |                                                              | 902.4921  | 2 | 8.7 | 284 | 298 | No |
|     |                          |          |                                                             | LQHLENELTHDIITK        | K | F | 95.00% | 68  |                                                              | 601.9944  | 3 | 3.9 | 284 | 298 | No |
|     |                          |          |                                                             | LQHLENELTHDIITK        | K | F | 95.00% | 35  |                                                              | 451.7479  | 4 | 4.1 | 284 | 298 | No |
|     |                          |          |                                                             | LSITGTDLK              | K | S | 95.00% | 38  |                                                              | 1110.6080 | 1 | 3.1 | 315 | 324 | No |
|     |                          |          |                                                             | LSITGTDLK              | K | S | 95.00% | 64  |                                                              | 555.8079  | 2 | 2.6 | 315 | 324 | No |
|     |                          |          |                                                             | LSSWVLLMK              | K | Y | 95.00% | 55  | M8: Oxidation                                                | 546.8135  | 2 | 5.8 | 259 | 267 | No |
|     |                          |          |                                                             | LVDKFLEDVK             | K | K | 95.00% | 56  |                                                              | 603.3456  | 2 | 4.2 | 150 | 159 | No |
|     |                          |          |                                                             | LVDKFLEDVKK            | K | L | 95.00% | 53  |                                                              | 667.3939  | 2 | 4.9 | 150 | 160 | No |
|     |                          |          |                                                             | LVDKFLEDVKK            | K | L | 95.00% | 38  |                                                              | 445.2642  | 3 | 2.7 | 150 | 160 | No |
|     |                          |          |                                                             | LYHSEAFVNFQDTEEA       | K | K | 95.00% | 107 |                                                              | 1029.4820 | 2 | 4.9 | 161 | 178 | No |
|     |                          |          |                                                             | LYHSEAFVNFQDTEEA       | K | K | 95.00% | 49  |                                                              | 686.6575  | 3 | 5.6 | 161 | 178 | No |
|     |                          |          |                                                             | LYHSEAFVNFQDTEEA       | K | Q | 95.00% | 126 |                                                              | 1093.5300 | 2 | 4.9 | 161 | 179 | No |
|     |                          |          |                                                             | LYHSEAFVNFQDTEEA       | K | Q | 95.00% | 64  |                                                              | 729.3540  | 3 | 2.7 | 161 | 179 | No |
|     |                          |          |                                                             | LYHSEAFVNFQDTEEA       | K | Q | 95.00% | 48  |                                                              | 547.2681  | 4 | 3.9 | 161 | 179 | No |
|     |                          |          |                                                             | SASLHLPK               | R | L | 95.00% | 29  |                                                              | 426.7522  | 2 | 2.7 | 307 | 314 | No |
|     |                          |          |                                                             | SVLGQLGITK             | K | V | 95.00% | 32  |                                                              | 1015.6240 | 1 | 8.8 | 325 | 334 | No |
|     |                          |          |                                                             | SVLGQLGITK             | K | V | 95.00% | 71  |                                                              | 508.3127  | 2 | 2.3 | 325 | 334 | No |
|     |                          |          |                                                             | TDTSHHQDHPFTFNK        | K | I | 95.00% | 31  |                                                              | 593.9319  | 3 | 6.4 | 35  | 49  | No |
|     |                          |          |                                                             | TLNQPDSQLQLTTGNGLFLSEG |   |   |        |     |                                                              |           |   |     |     |     |    |
|     |                          |          |                                                             | LK                     | R | L | 95.00% | 122 |                                                              | 1287.6880 | 2 | 9.9 | 126 | 149 | No |
|     |                          |          |                                                             | TLNQPDSQLQLTTGNGLFLSEG |   |   |        |     |                                                              |           |   |     |     |     |    |
|     |                          |          |                                                             | LK                     | R | L | 95.00% | 52  |                                                              | 858.7913  | 3 | 6.4 | 126 | 149 | No |

|                        |                                       |        |                                                                                                                       |                        |               |          |        |     |                |           |    |     |     |     |    |
|------------------------|---------------------------------------|--------|-----------------------------------------------------------------------------------------------------------------------|------------------------|---------------|----------|--------|-----|----------------|-----------|----|-----|-----|-----|----|
| 535                    | IPI00554521                           | FTH1   | FERRITIN HEAVY CHAIN.                                                                                                 | VFSNGADLSGVTEEAPLK     | K             | L        | 95.00% | 127 |                | 917.4723  | 2  | 7.2 | 335 | 352 | No |
|                        |                                       |        |                                                                                                                       | IFLQDIK                | R             | K        | 95.00% | 37  |                | 438.7653  | 2  | 3.6 | 81  | 87  | No |
|                        |                                       |        |                                                                                                                       | MGAPESGLAEYLFDK        | K             | H        | 95.00% | 83  | M1: Oxidation  | 822.3932  | 2  | 9.7 | 159 | 173 | No |
|                        |                                       |        |                                                                                                                       | NVNQSLLELHK            | K             | L        | 95.00% | 63  |                | 647.8637  | 2  | 5.8 | 110 | 120 | No |
|                        |                                       |        |                                                                                                                       | NVNQSLLELHK            | K             | L        | 95.00% | 31  |                | 432.2444  | 3  | 4.3 | 110 | 120 | No |
|                        |                                       |        |                                                                                                                       | QNYHQDSEAAINR          | R             | Q        | 95.00% | 67  |                | 773.3620  | 2  | 7.6 | 11  | 23  | No |
|                        |                                       |        |                                                                                                                       | QNYHQDSEAAINR          | R             | Q        | 95.00% | 63  |                | 515.9103  | 3  | 7.1 | 11  | 23  | No |
| 536                    | IPI00554701                           | UCRC   | UBIQUINOL-CYTOCHROME C REDUCTASE COMPLEX 7.2 KDA PROTEIN.                                                             | YFLHQSHAEERHAEK        | K             | L        | 95.00% | 45  |                | 647.3115  | 3  | 7.2 | 55  | 69  | No |
|                        |                                       |        |                                                                                                                       | AFDQGADAIYDHINEGK      | R             | L        | 95.00% | 79  |                | 932.4378  | 2  | 8.7 | 35  | 51  | No |
|                        |                                       |        |                                                                                                                       | AFDQGADAIYDHINEGK      | R             | L        | 95.00% | 55  |                | 621.9577  | 3  | 3.1 | 35  | 51  | No |
| 537                    | IPI00444262; IPI00604620; IPI00827674 | NCL    | CDNA FLJ45706 FIS, CLONE FEBRA2028457, HIGHLY SIMILAR TO NUCLEOLIN.; ISOFORM 1 OF NUCLEOLIN.; ISOFORM 2 OF NUCLEOLIN. | LYSLLFR                | K             | R        | 95.00% | 49  |                | 456.2756  | 2  | 8.8 | 10  | 16  | No |
|                        |                                       |        |                                                                                                                       | EVFEDAAEIR             | K             | L        | 95.00% | 44  |                | 589.7918  | 2  | 5.4 | 411 | 420 | No |
|                        |                                       |        |                                                                                                                       | FGYVDFESAEDLEK         | K             | A        | 95.00% | 71  |                | 824.8788  | 2  | 7.0 | 349 | 362 | No |
|                        |                                       |        |                                                                                                                       | GFVDFNFSEEDAK          | K             | A        | 95.00% | 45  |                | 781.3513  | 2  | 8.7 | 504 | 517 | No |
|                        |                                       |        |                                                                                                                       | GIAYIEFK               | K             | T        | 95.00% | 36  |                | 470.7637  | 2  | 5.4 | 430 | 437 | No |
|                        |                                       |        |                                                                                                                       | GLSEDTTEETLKESEFDGVSVR | K             | A        | 95.00% | 44  |                | 734.0173  | 3  | 4.7 | 471 | 490 | No |
|                        |                                       |        |                                                                                                                       | VTQDELKEVFEDAAEIR      | K             | L        | 95.00% | 37  |                | 664.6744  | 3  | 7.4 | 297 | 313 | No |
| 538                    | IPI00604664                           | NDUFS1 | NADH-UBIQUINONE OXIDOREDUCTASE 75 KDA SUBUNIT, MITOCHONDRIALPRECURSOR.                                                | ALSEIAGMTLPYDTLDQVR    | R             | N        | 95.00% | 112 | M8: Oxidation  | 1055.0410 | 2  | 9.6 | 625 | 643 | No |
|                        |                                       |        |                                                                                                                       | ALSEIAGMTLPYDTLDQVR    | R             | N        | 95.00% | 45  | M8: Oxidation  | 703.6931  | 3  | 4.6 | 625 | 643 | No |
|                        |                                       |        |                                                                                                                       | AVEDKNIGPLVK           | R             | T        | 95.00% | 52  |                | 641.8768  | 2  | 6.6 | 159 | 170 | No |
|                        |                                       |        |                                                                                                                       | DFYMTDSISR             | K             | A        | 95.00% | 43  | M4: Oxidation  | 625.7758  | 2  | 6.0 | 693 | 702 | No |
|                        |                                       |        |                                                                                                                       | DFYMTDSISR             | K             | A        | 95.00% | 34  |                | 617.7772  | 2  | 4.1 | 693 | 702 | No |
|                        |                                       |        |                                                                                                                       | DVAAIAGGLVDAEALVALK    | K             | D        | 95.00% | 139 |                | 898.5208  | 2  | 9.2 | 337 | 355 | No |
|                        |                                       |        |                                                                                                                       | FASEIAGVDDLTTGR        | R             | G        | 95.00% | 125 |                | 804.9034  | 2  | 7.3 | 185 | 200 | No |
|                        |                                       |        |                                                                                                                       | FAYDGLKR               | R             | Q        | 95.00% | 42  |                | 485.2636  | 2  | 3.8 | 292 | 299 | No |
|                        |                                       |        |                                                                                                                       | FEAPLFNAR              | R             | I        | 95.00% | 61  |                | 532.7828  | 2  | 4.6 | 409 | 417 | No |
|                        |                                       |        |                                                                                                                       | GLLTYTSWEDALSR         | K             | V        | 95.00% | 123 |                | 806.4127  | 2  | 9.8 | 312 | 325 | No |
|                        |                                       |        |                                                                                                                       | GNDMQVGTYIEK           | R             | M        | 95.00% | 65  | M4: Oxidation  | 685.8210  | 2  | 5.7 | 201 | 212 | No |
|                        |                                       |        |                                                                                                                       | GNWILTNSEK             | K             | S        | 95.00% | 52  |                | 581.3013  | 2  | 3.6 | 99  | 108 | No |
|                        |                                       |        |                                                                                                                       | IASQVAALDLGYKPGVEAIR   | R             | K        | 95.00% | 98  |                | 1036.0870 | 2  | 5.7 | 519 | 538 | No |
|                        |                                       |        |                                                                                                                       | IASQVAALDLGYKPGVEAIR   | R             | K        | 95.00% | 82  |                | 691.0619  | 3  | 7.2 | 519 | 538 | No |
|                        |                                       |        |                                                                                                                       | IASQVAALDLGYKPGVEAIRK  | R             | N        | 95.00% | 66  |                | 733.7598  | 3  | 6.1 | 519 | 539 | No |
|                        |                                       |        |                                                                                                                       | IASQVAALDLGYKPGVEAIRK  | R             | N        | 95.00% | 29  |                | 550.5708  | 4  | 4.3 | 519 | 539 | No |
|                        |                                       |        |                                                                                                                       | ILQDIASGSHPPFSQVLK     | K             | E        | 95.00% | 85  |                | 920.5068  | 2  | 4.8 | 451 | 467 | No |
|                        |                                       |        |                                                                                                                       | ILQDIASGSHPPFSQVLK     | K             | E        | 95.00% | 58  |                | 614.0071  | 3  | 4.7 | 451 | 467 | No |
|                        |                                       |        |                                                                                                                       | KPMVVLGSSALQR          | K             | N        | 95.00% | 69  | M3: Oxidation  | 701.3995  | 2  | 1.7 | 471 | 483 | No |
|                        |                                       |        |                                                                                                                       | KPMVVLGSSALQR          | K             | N        | 95.00% | 54  | M3: Oxidation  | 467.9353  | 3  | 1.0 | 471 | 483 | No |
|                        |                                       |        |                                                                                                                       | LEEVSPLNLR             | R             | Y        | 95.00% | 56  |                | 578.3251  | 2  | 4.2 | 646 | 655 | No |
|                        |                                       |        |                                                                                                                       | LVNQQLLADPLVPPQLTIK    | K             | D        | 95.00% | 86  |                | 1050.6330 | 2  | 6.5 | 674 | 692 | No |
|                        |                                       |        |                                                                                                                       | LVNQQLLADPLVPPQLTIK    | K             | D        | 95.00% | 45  |                | 700.7578  | 3  | 6.6 | 674 | 692 | No |
|                        |                                       |        |                                                                                                                       | MHEDINEEWISDK          | R             | T        | 95.00% | 73  | M1: Oxidation  | 831.3620  | 2  | 2.6 | 277 | 289 | No |
|                        |                                       |        |                                                                                                                       | MHEDINEEWISDK          | R             | T        | 95.00% | 45  | M1: Oxidation  | 554.5779  | 3  | 3.7 | 277 | 289 | No |
|                        |                                       |        |                                                                                                                       | MHEDINEEWISDKTR        | R             | F        | 95.00% | 39  | M1: Oxidation  | 640.2955  | 3  | 5.3 | 277 | 291 | No |
|                        |                                       |        |                                                                                                                       | MTSGVTGDWK             | R             | V        | 95.00% | 31  | M1: Oxidation  | 549.2517  | 2  | 1.7 | 502 | 511 | No |
|                        |                                       |        |                                                                                                                       | NDGAAILAAVSSIAQK       | R             | I        | 95.00% | 129 |                | 764.9252  | 2  | 5.9 | 484 | 499 | No |
|                        |                                       |        |                                                                                                                       | NDGAAILAAVSSIAQK       | R             | I        | 95.00% | 98  |                | 510.2858  | 3  | 5.4 | 484 | 499 | No |
|                        |                                       |        |                                                                                                                       | NRLEEVSPLNLR           | R             | Y        | 95.00% | 69  |                | 713.3972  | 2  | 3.7 | 644 | 655 | No |
|                        |                                       |        |                                                                                                                       | NRLEEVSPLNLR           | R             | Y        | 95.00% | 30  |                | 475.9348  | 3  | 5.1 | 644 | 655 | No |
|                        |                                       |        |                                                                                                                       | VAGMLQSFQGK            | R             | D        | 95.00% | 82  | M4: Oxidation  | 591.3046  | 2  | 2.0 | 326 | 336 | No |
|                        |                                       |        |                                                                                                                       | VALIGSPVDLTYTYDHLGDSPK | K             | I        | 95.00% | 115 |                | 1181.1120 | 2  | 7.8 | 429 | 450 | No |
| VALIGSPVDLTYTYDHLGDSPK | K                                     | I      | 95.00%                                                                                                                | 46                     |               | 787.7412 | 3      | 4.2 | 429            | 450       | No |     |     |     |    |
| VAVTPPGLAR             | K                                     | E      | 95.00%                                                                                                                | 45                     |               | 490.7996 | 2      | 2.0 | 608            | 617       | No |     |     |     |    |
| VGMQIPR                | K                                     | F      | 95.00%                                                                                                                | 40                     | M3: Oxidation | 408.7258 | 2      | 4.3 | 56             | 62        | No |     |     |     |    |
| 539                    | IPI00641582                           | BAG3   | BAG FAMILY MOLECULAR CHAPERONE REGULATOR 3.                                                                           | ELLALDSVDPEGR          | K             | A        | 95.00% | 90  |                | 707.3693  | 2  | 5.6 | 461 | 473 | No |
|                        |                                       |        |                                                                                                                       | FRTEAAAAAPQR           | R             | S        | 95.00% | 35  |                | 644.8473  | 2  | 8.3 | 122 | 133 | No |
|                        |                                       |        |                                                                                                                       | VQGLEQAVDNFEGK         | K             | K        | 95.00% | 104 |                | 767.3845  | 2  | 4.1 | 432 | 445 | No |
| 540                    | IPI00023048; IPI00642971              | EEF1D  | ELONGATION FACTOR 1-DELTA.; EUKARYOTIC TRANSLATION ELONGATION FACTOR 1 DELTA ISOFORM 1.                               | ATAPQTOHVSPMR          | R             | Q        | 95.00% | 36  | M12: Oxidation | 720.3621  | 2  | 6.8 | 490 | 502 | No |
|                        |                                       |        |                                                                                                                       | FYEQMGVAVAGASR         | R             | Q        | 95.00% | 102 | M5: Oxidation  | 771.8605  | 2  | 7.8 | 25  | 38  | No |
|                        |                                       |        |                                                                                                                       | GVVQELQQAISK           | R             | L        | 95.00% | 78  |                | 650.3704  | 2  | 4.3 | 96  | 107 | No |
|                        |                                       |        |                                                                                                                       | IASLEVENQSLR           | R             | G        | 95.00% | 93  |                | 679.8715  | 2  | 5.3 | 84  | 95  | No |
|                        |                                       |        |                                                                                                                       | LVPVGYGIR              | K             | K        | 95.00% | 25  |                | 487.2987  | 2  | 6.1 | 599 | 607 | No |
|                        |                                       |        |                                                                                                                       | SIQLDGLVWGASK          | R             | L        | 95.00% | 80  |                | 687.3795  | 2  | 6.0 | 220 | 232 | No |

| Accession         | Protein ID  | Protein Name | Modification                          | Site                    | Frequency   | Count     | Mass     | Charge    | pI             | Abundance | Score  | Label |      |          |     |
|-------------------|-------------|--------------|---------------------------------------|-------------------------|-------------|-----------|----------|-----------|----------------|-----------|--------|-------|------|----------|-----|
| 541               | IPI00644697 | HEBP2        | HEBP2 PROTEIN (FRAGMENT).             | SLAGSSSGPGASSGTSGDHGELV | K           | I         | 95.00%   | 48        |                | 729.0236  | 3      | 3.1   | 60   | 83       | No  |
|                   |             |              |                                       | VR                      | R           | S         | 95.00%   | 42        |                | 484.7509  | 2      | 6.6   | 133  | 140      | No  |
|                   |             |              |                                       | AEMTVFVR                | K           | L         | 95.00%   | 57        | M3: Oxidation  | 681.3456  | 2      | 6.8   | 173  | 184      | No  |
| 542               | IPI00645016 | S100A1       | PROTEIN S100-A1.                      | YYVTAGYNSPVK            | K           | D         | 95.00%   | 122       |                | 846.4542  | 2      | 8.7   | 36   | 50       | No  |
|                   |             |              |                                       | ELLQTELSGFLDAQK         | K           | D         | 95.00%   | 73        |                | 564.6373  | 3      | 6.1   | 36   | 50       | No  |
|                   |             |              |                                       | ELLQTELSGFLDAQK         | K           | D         | 95.00%   | 73        |                | 564.6373  | 3      | 6.1   | 36   | 50       | No  |
| 543               | IPI00645078 | UBE1         | UBIQUITIN-ACTIVATING ENZYME E1.       | ELLQTELSGFLDAQKDVAVDK   | K           | V         | 95.00%   | 39        |                | 812.0911  | 3      | 9.0   | 36   | 57       | No  |
|                   |             |              |                                       | GSELETAMETLINVFAHSGK    | M           | E         | 95.00%   | 39        | M8: Oxidation  | 572.5368  | 4      | 9.2   | 2    | 22       | No  |
|                   |             |              |                                       | AAVATFLQSVQVPEFTPK      | R           | S         | 95.00%   | 71        |                | 967.0309  | 2      | 5.4   | 785  | 802      | No  |
|                   |             |              |                                       | AAVATFLQSVQVPEFTPK      | R           | S         | 95.00%   | 73        |                | 645.0237  | 3      | 6.1   | 785  | 802      | No  |
|                   |             |              |                                       | ALPAVQQNNLDEDLIR        | R           | K         | 95.00%   | 66        |                | 904.9880  | 2      | 9.6   | 369  | 384      | No  |
|                   |             |              |                                       | ALPAVQQNNLDEDLIRK       | R           | L         | 95.00%   | 117       |                | 969.0358  | 2      | 9.3   | 369  | 385      | No  |
|                   |             |              |                                       | ATLPSPKLPGFK            | K           | M         | 95.00%   | 46        |                | 685.8920  | 2      | 5.5   | 831  | 843      | No  |
|                   |             |              |                                       | ATLPSPKLPGFK            | K           | M         | 95.00%   | 40        |                | 457.5958  | 3      | 2.2   | 831  | 843      | No  |
|                   |             |              |                                       | AVTLHDQGTQAWDLSSQFYLR   | K           | E         | 95.00%   | 40        |                | 836.4208  | 3      | 6.0   | 98   | 119      | No  |
|                   |             |              |                                       | DEFEGFLK                | R           | Q         | 95.00%   | 32        |                | 492.7404  | 2      | 5.2   | 650  | 657      | No  |
| 544               | IPI00645194 | ITGB1        | INTEGRIN BETA 1 ISOFORM 1A PRECURSOR. | GNVQVVIPFLTESYSSSQDPPEK | K           | S         | 95.00%   | 37        |                | 841.0920  | 3      | 5.7   | 605  | 627      | No  |
|                   |             |              |                                       | IHVSDQELQSANASVDDSR     | K           | L         | 95.00%   | 63        |                | 690.9997  | 3      | 7.0   | 807  | 825      | No  |
|                   |             |              |                                       | IHVSDQELQSANASVDDSRLEEL | K           | A         | 95.00%   | 84        |                | 895.1164  | 3      | 6.2   | 807  | 830      | No  |
|                   |             |              |                                       | K                       | K           | A         | 95.00%   | 84        |                | 895.1164  | 3      | 6.2   | 807  | 830      | No  |
|                   |             |              |                                       | IYDDFFQNLQDGVANALDNVDA  | R           | M         | 95.00%   | 108       |                | 867.4079  | 3      | 6.7   | 559  | 581      | No  |
|                   |             |              |                                       | R                       | R           | M         | 95.00%   | 108       |                | 867.4079  | 3      | 6.7   | 559  | 581      | No  |
|                   |             |              |                                       | KPLLESGTLGTK            | R           | G         | 95.00%   | 50        |                | 622.3691  | 2      | 3.0   | 593  | 604      | No  |
|                   |             |              |                                       | LAGTQPLEVLEAVQR         | R           | S         | 95.00%   | 95        |                | 812.4617  | 2      | 5.1   | 679  | 693      | No  |
|                   |             |              |                                       | LAGTQPLEVLEAVQR         | R           | S         | 95.00%   | 65        |                | 541.9770  | 3      | 5.0   | 679  | 693      | No  |
|                   |             |              |                                       | LDQPMTEIVSR             | R           | V         | 95.00%   | 67        | M5: Oxidation  | 652.8329  | 2      | 4.5   | 1011 | 1021     | No  |
|                   |             |              |                                       | LQTSVLVSLGR             | R           | G         | 95.00%   | 69        |                | 630.3732  | 2      | 4.9   | 70   | 81       | No  |
|                   |             |              |                                       | NEEDAAELVALAQAVNAR      | R           | A         | 95.00%   | 128       |                | 942.4814  | 2      | 4.6   | 351  | 368      | No  |
|                   |             |              |                                       | NEEDAAELVALAQAVNAR      | R           | A         | 95.00%   | 62        |                | 628.6583  | 3      | 6.9   | 351  | 368      | No  |
|                   |             |              |                                       | NIILGGVK                | K           | A         | 95.00%   | 30        |                | 813.5253  | 1      | 6.6   | 90   | 97       | No  |
|                   |             |              |                                       | QFLDYFK                 | K           | T         | 95.00%   | 45        |                | 480.7474  | 2      | 3.9   | 974  | 980      | No  |
|                   |             |              |                                       | QFLFRPVDVTK             | R           | L         | 95.00%   | 35        |                | 718.8942  | 2      | 7.9   | 516  | 526      | No  |
|                   |             |              |                                       | QPAENVNQLTDPK           | K           | F         | 95.00%   | 79        |                | 808.9057  | 2      | 6.9   | 658  | 671      | No  |
|                   |             |              |                                       | SLVASLAEPDFVTDFAK       | K           | F         | 95.00%   | 98        |                | 955.0093  | 2      | 7.9   | 305  | 322      | No  |
|                   |             |              |                                       | YDQVAVFGSDLQEK          | R           | L         | 95.00%   | 99        |                | 828.4034  | 2      | 4.2   | 451  | 465      | No  |
|                   |             |              |                                       | 545                     | IPI00645836 | ESD       | PROTEIN. | IGFGSFVEK | R              | T         | 95.00% | 51    |      | 492.2678 | 2   |
| LKPEDITQIQPQQLVLR | K           | L            | 95.00%                                |                         |             |           |          | 75        |                | 1010.0900 | 2      | 5.5   | 106  | 122      | No  |
| LKPEDITQIQPQQLVLR | K           | L            | 95.00%                                |                         |             |           |          | 43        |                | 673.7283  | 3      | 4.3   | 106  | 122      | No  |
| 546               | IPI00654755 | HBB          | HEMOGLOBIN SUBUNIT BETA.              | LSEGVTSYK               | K           | S         | 95.00%   | 30        |                | 548.8009  | 2      | 4.5   | 389  | 398      | No  |
|                   |             |              |                                       | AFSGYLGTDQSK            | K           | W         | 95.00%   | 56        |                | 637.3127  | 2      | 8.7   | 135  | 146      | Yes |
|                   |             |              |                                       | AYDATHLVK               | K           | S         | 95.00%   | 41        |                | 509.2746  | 2      | 4.3   | 149  | 157      | Yes |
| 546               | IPI00654755 | HBB          | HEMOGLOBIN SUBUNIT BETA.              | SGYHQSAEHLVVIAPDTSR     | K           | G         | 95.00%   | 63        |                | 770.0551  | 3      | 7.6   | 13   | 34       | Yes |
|                   |             |              |                                       | EFTPPVQAAYQK            | K           | V         | 95.00%   | 91        |                | 689.8578  | 2      | 5.1   | 122  | 133      | No  |
|                   |             |              |                                       | EFTPPVQAAYQK            | K           | V         | 95.00%   | 41        |                | 460.2432  | 3      | 9.6   | 122  | 133      | No  |
|                   |             |              |                                       | EFTPPVQAAYQKVAVGANALA   | K           | Y         | 95.00%   | 37        |                | 837.1279  | 3      | 4.7   | 122  | 145      | No  |
|                   |             |              |                                       | HK                      | K           | Y         | 95.00%   | 37        |                | 837.1279  | 3      | 4.7   | 122  | 145      | No  |
|                   |             |              |                                       | EFTPPVQAAYQKVAVGANALA   | K           | Y         | 95.00%   | 37        |                | 837.1279  | 3      | 4.7   | 122  | 145      | No  |
|                   |             |              |                                       | HKYH                    | K           | -         | 95.00%   | 31        |                | 703.1296  | 4      | 5.8   | 122  | 147      | No  |
|                   |             |              |                                       | FFESFGDLSTPDAVMGNPK     | R           | V         | 95.00%   | 130       | M15: Oxidation | 1037.9830 | 2      | 6.9   | 42   | 60       | No  |
|                   |             |              |                                       | FFESFGDLSTPDAVMGNPK     | R           | V         | 95.00%   | 101       | M15: Oxidation | 692.3245  | 3      | 7.1   | 42   | 60       | No  |
|                   |             |              |                                       | FFESFGDLSTPDAVMGNPK     | R           | V         | 95.00%   | 130       |                | 1029.9880 | 2      | 9.5   | 42   | 60       | No  |
|                   |             |              |                                       | FFESFGDLSTPDAVMGNPK     | R           | V         | 95.00%   | 77        |                | 686.9920  | 3      | 5.8   | 42   | 60       | No  |
|                   |             |              |                                       | FFESFGDLSTPDAVMGNPKVK   | R           | A         | 95.00%   | 60        | M15: Oxidation | 768.0440  | 3      | 4.2   | 42   | 62       | No  |
|                   |             |              |                                       | GTFATLSELHC DK          | K           | L         | 95.00%   | 87        |                | 711.3437  | 2      | 4.1   | 84   | 96       | No  |
|                   |             |              |                                       | KVLGAFSDGLAHLDNLK       | K           | G         | 95.00%   | 129       |                | 899.5036  | 2      | 7.2   | 67   | 83       | Yes |
|                   |             |              |                                       | KVLGAFSDGLAHLDNLK       | K           | G         | 95.00%   | 81        |                | 600.0053  | 3      | 7.7   | 67   | 83       | Yes |
|                   |             |              |                                       | KVLGAFSDGLAHLDNLK       | K           | G         | 95.00%   | 41        |                | 450.2552  | 4      | 6.0   | 67   | 83       | Yes |
|                   |             |              |                                       | LHVDPENFR               | K           | L         | 95.00%   | 33        |                | 1126.5750 | 1      | 9.2   | 97   | 105      | Yes |
|                   |             |              |                                       | LHVDPENFR               | K           | L         | 95.00%   | 56        |                | 563.7872  | 2      | 1.7   | 97   | 105      | Yes |
|                   |             |              |                                       | LLGNVLCVLAHHFGK         | R           | E         | 95.00%   | 64        |                | 573.9992  | 3      | 5.0   | 106  | 121      | No  |
|                   |             |              |                                       | LLGNVLCVLAHHFGK         | R           | E         | 95.00%   | 41        |                | 430.7511  | 4      | 4.5   | 106  | 121      | No  |
| LLVVPWTQR         | R           | F            | 95.00%                                | 31                      |             | 1274.7390 | 1        | 9.8       | 32             | 41        | Yes    |       |      |          |     |
| LLVVPWTQR         | R           | F            | 95.00%                                | 71                      |             | 637.8707  | 2        | 5.7       | 32             | 41        | Yes    |       |      |          |     |
| LLVVPWTQR         | R           | F            | 95.00%                                | 40                      |             | 425.5841  | 3        | 8.3       | 32             | 41        | Yes    |       |      |          |     |
| SAVTALWGK         | K           | V            | 95.00%                                | 45                      |             | 932.5253  | 1        | 5.1       | 10             | 18        | No     |       |      |          |     |

| Accession            | Protein ID  | Gene     | Description                                      | Protein                           | Start                                      | End          | Score                              | Length                | Mass                     | Charge | Abundance                                                                          | Count            | Score    | Length | Mass   | Charge | Abundance | Count | Score | Length | Mass | Charge | Abundance | Count |
|----------------------|-------------|----------|--------------------------------------------------|-----------------------------------|--------------------------------------------|--------------|------------------------------------|-----------------------|--------------------------|--------|------------------------------------------------------------------------------------|------------------|----------|--------|--------|--------|-----------|-------|-------|--------|------|--------|-----------|-------|
|                      |             |          |                                                  | SAVTALWGK                         | K                                          | V            | 95.00%                             | 71                    | 466.7651                 | 2      | 2.0                                                                                | 10               | 18       | No     |        |        |           |       |       |        |      |        |           |       |
|                      |             |          |                                                  | SAVTALWGKVVDEVGGEALG              | K                                          | L            | 95.00%                             | 129                   | 1114.5980                | 2      | 9.4                                                                                | 10               | 31       | No     |        |        |           |       |       |        |      |        |           |       |
|                      |             |          |                                                  | R                                 | K                                          | L            | 95.00%                             | 68                    | 743.3999                 | 3      | 7.5                                                                                | 10               | 31       | No     |        |        |           |       |       |        |      |        |           |       |
|                      |             |          |                                                  | SAVTALWGKVVDEVGGEALG              | K                                          | L            | 95.00%                             | 68                    | 743.3999                 | 3      | 7.5                                                                                | 10               | 31       | No     |        |        |           |       |       |        |      |        |           |       |
|                      |             |          |                                                  | R                                 | K                                          | L            | 95.00%                             | 68                    | 743.3999                 | 3      | 7.5                                                                                | 10               | 31       | No     |        |        |           |       |       |        |      |        |           |       |
|                      |             |          |                                                  | SAVTALWGKVVDEVGGEALG              | K                                          | F            | 95.00%                             | 47                    | 871.7319                 | 4      | 8.4                                                                                | 10               | 41       | No     |        |        |           |       |       |        |      |        |           |       |
|                      |             |          |                                                  | RLLVVYPWTQR                       | K                                          | F            | 95.00%                             | 24                    | 697.5867                 | 5      | 7.8                                                                                | 10               | 41       | No     |        |        |           |       |       |        |      |        |           |       |
|                      |             |          |                                                  | SAVTALWGKVVDEVGGEALG              | M                                          | S            | 95.00%                             | 36                    | 952.5192                 | 1      | 9.2                                                                                | 2                | 9        | No     |        |        |           |       |       |        |      |        |           |       |
|                      |             |          |                                                  | RLLVVYPWTQR                       | M                                          | S            | 95.00%                             | 39                    | 476.7600                 | 2      | 1.8                                                                                | 2                | 9        | No     |        |        |           |       |       |        |      |        |           |       |
|                      |             |          |                                                  | VHLTPEEK                          | M                                          | S            | 95.00%                             | 39                    | 476.7600                 | 2      | 1.8                                                                                | 2                | 9        | No     |        |        |           |       |       |        |      |        |           |       |
|                      |             |          |                                                  | VHLTPEEK                          | M                                          | S            | 95.00%                             | 39                    | 476.7600                 | 2      | 1.8                                                                                | 2                | 9        | No     |        |        |           |       |       |        |      |        |           |       |
|                      |             |          |                                                  | VHLTPEEKSAVTALWGKVVDE             | M                                          | L            | 95.00%                             | 57                    | 791.1775                 | 4      | 8.6                                                                                | 2                | 31       | No     |        |        |           |       |       |        |      |        |           |       |
|                      |             |          |                                                  | VGGEALGR                          | K                                          | G            | 95.00%                             | 137                   | 835.4454                 | 2      | -5.0                                                                               | 68               | 83       | Yes    |        |        |           |       |       |        |      |        |           |       |
|                      |             |          |                                                  | VLGAFSDGLAHLNLIK                  | K                                          | G            | 95.00%                             | 66                    | 557.3033                 | 3      | 1.8                                                                                | 68               | 83       | Yes    |        |        |           |       |       |        |      |        |           |       |
|                      |             |          |                                                  | VLGAFSDGLAHLNLIK                  | K                                          | G            | 95.00%                             | 66                    | 557.3033                 | 3      | 1.8                                                                                | 68               | 83       | Yes    |        |        |           |       |       |        |      |        |           |       |
|                      |             |          |                                                  | VNVDEVGGEALGR                     | K                                          | L            | 95.00%                             | 73                    | 1314.6760                | 1      | 8.2                                                                                | 19               | 31       | No     |        |        |           |       |       |        |      |        |           |       |
|                      |             |          |                                                  | VNVDEVGGEALGR                     | K                                          | L            | 95.00%                             | 115                   | 657.8383                 | 2      | 2.5                                                                                | 19               | 31       | No     |        |        |           |       |       |        |      |        |           |       |
|                      |             |          |                                                  | VNVDEVGGEALGR                     | K                                          | L            | 95.00%                             | 79                    | 438.8956                 | 3      | 4.4                                                                                | 19               | 31       | No     |        |        |           |       |       |        |      |        |           |       |
|                      |             |          |                                                  | VNVDEVGGEALGRLLVVYPWTQ            | K                                          | F            | 95.00%                             | 38                    | 857.4680                 | 3      | 6.0                                                                                | 19               | 41       | No     |        |        |           |       |       |        |      |        |           |       |
|                      |             |          |                                                  | R                                 | K                                          | Y            | 95.00%                             | 49                    | 1149.6820                | 1      | 6.8                                                                                | 134              | 145      | Yes    |        |        |           |       |       |        |      |        |           |       |
|                      |             |          |                                                  | VVAGVANALAHK                      | K                                          | Y            | 95.00%                             | 92                    | 575.3436                 | 2      | 4.4                                                                                | 134              | 145      | Yes    |        |        |           |       |       |        |      |        |           |       |
|                      |             |          |                                                  | VVAGVANALAHK                      | K                                          | -            | 95.00%                             | 64                    | 725.4076                 | 2      | 7.5                                                                                | 134              | 147      | Yes    |        |        |           |       |       |        |      |        |           |       |
|                      |             |          |                                                  | LOC645899;<br>LOC646195;<br>RPS28 | 40S RIBOSOMAL PROTEIN S28.; 8 KDA PROTEIN. | EGDVLTLLESER | R                                  | E                     | 95.00%                   | 66     | 680.8567                                                                           | 2                | 6.9      | 52     | 63     | No     |           |       |       |        |      |        |           |       |
|                      |             |          |                                                  | 547                               | IPI00719622; IPI00787692                   | GSTT1        | GLUTATHIONE S-TRANSFERASE THETA-1. | VEFMDDTSR             | R                        | S      | 95.00%                                                                             | 37               | 558.2403 | 2      | 4.4    | 32     | 40        | No    |       |        |      |        |           |       |
|                      |             |          |                                                  |                                   |                                            |              |                                    | GQHLSDAFAQVNPVK       | K                        | K      | 95.00%                                                                             | 83               | 812.9329 | 2      | 8.0    | 38     | 52        | No    |       |        |      |        |           |       |
|                      |             |          |                                                  |                                   |                                            |              |                                    | GQHLSDAFAQVNPVK       | K                        | K      | 95.00%                                                                             | 34               | 542.2909 | 3      | 7.6    | 38     | 52        | No    |       |        |      |        |           |       |
|                      |             |          |                                                  |                                   |                                            |              |                                    | GQHLSDAFAQVNPVK       | K                        | V      | 95.00%                                                                             | 46               | 584.9894 | 3      | 7.4    | 38     | 53        | No    |       |        |      |        |           |       |
|                      |             |          |                                                  |                                   |                                            |              |                                    | QRVEAAVGEDLFQEAHEVILK | R                        | A      | 95.00%                                                                             | 30               | 596.0729 | 4      | 9.1    | 196    | 216       | No    |       |        |      |        |           |       |
|                      |             |          |                                                  |                                   |                                            |              |                                    | VDEYLAWQHTTLR         | R                        | R      | 95.00%                                                                             | 45               | 544.6153 | 3      | 7.3    | 95     | 107       | No    |       |        |      |        |           |       |
|                      |             |          |                                                  |                                   |                                            |              |                                    | 549                   | IPI00031583; IPI00743314 | VDP    | HYPOTHETICAL PROTEIN DKFZP451D234.;<br>GENERAL VESICULAR TRANSPORT FACTOR<br>P115. | DSEQVAELKQELATLK | R        | S      | 95.00% | 73     | 901.4902  | 2     | 9.8   | 794    | 809  | No     |           |       |
|                      |             |          |                                                  |                                   |                                            |              |                                    |                       |                          |        |                                                                                    | DSEQVAELKQELATLK | R        | S      | 95.00% | 48     | 601.3275  | 3     | 6.4   | 783    | 798  | No     |           |       |
|                      |             |          |                                                  |                                   |                                            |              |                                    |                       |                          |        |                                                                                    | EQDDLVLADQDQK    | K        | I      | 95.00% | 58     | 871.9487  | 2     | 4.5   | 916    | 930  | No     |           |       |
|                      |             |          |                                                  |                                   |                                            |              |                                    |                       |                          |        |                                                                                    | EVIRNDGVLLQLALTR | R        | S      | 95.00% | 37     | 604.0262  | 3     | 4.2   | 184    | 199  | No     |           |       |
| GVMMGQSSAGPQHTAEIPIK | R           | L        | 95.00%                                           | 37                                | 681.3268                                   | 3            | 1.6                                |                       |                          |        |                                                                                    | 6                | 25       | No     |        |        |           |       |       |        |      |        |           |       |
| IVAFENAFER           | K           | L        | 95.00%                                           | 57                                | 598.3141                                   | 2            | 7.7                                |                       |                          |        |                                                                                    | 203              | 212      | No     |        |        |           |       |       |        |      |        |           |       |
| LMDLLADSR            | R           | E        | 95.00%                                           | 31                                | 525.2731                                   | 2            | 7.8                                |                       |                          |        |                                                                                    | 171              | 179      | No     |        |        |           |       |       |        |      |        |           |       |
| LQTEKQELLQK          | K           | T        | 95.00%                                           | 51                                | 679.3907                                   | 2            | 3.1                                |                       |                          |        |                                                                                    | 811              | 821      | No     |        |        |           |       |       |        |      |        |           |       |
| LREEIEELKR           | R           | N        | 95.00%                                           | 35                                | 438.9197                                   | 3            | 3.9                                |                       |                          |        |                                                                                    | 735              | 744      | No     |        |        |           |       |       |        |      |        |           |       |
| NDGVLLQLALTR         | R           | S        | 95.00%                                           | 74                                | 656.8882                                   | 2            | 7.2                                |                       |                          |        |                                                                                    | 188              | 199      | No     |        |        |           |       |       |        |      |        |           |       |
| NQELLSQQLTEK         | R           | D        | 95.00%                                           | 95                                | 715.8821                                   | 2            | 5.0                                |                       |                          |        |                                                                                    | 745              | 756      | No     |        |        |           |       |       |        |      |        |           |       |
| QSEDLGSQFTEIFIK      | R           | Q        | 95.00%                                           | 86                                | 871.4423                                   | 2            | 6.8                                |                       |                          |        |                                                                                    | 109              | 123      | No     |        |        |           |       |       |        |      |        |           |       |
| SQLNSQSVEITK         | K           | L        | 95.00%                                           | 61                                | 667.3552                                   | 2            | 4.6                                |                       |                          |        |                                                                                    | 799              | 810      | No     |        |        |           |       |       |        |      |        |           |       |
| SSQTSGTNEQSSAIVSAR   | K           | D        | 95.00%                                           | 99                                | 905.4383                                   | 2            | 6.1                                |                       |                          |        |                                                                                    | 765              | 782      | No     |        |        |           |       |       |        |      |        |           |       |
| SVEVQGETETIIATK      | K           | T        | 95.00%                                           | 64                                | 802.9300                                   | 2            | 8.5                                |                       |                          |        |                                                                                    | 828              | 842      | No     |        |        |           |       |       |        |      |        |           |       |
| TLEQHDNIVTHYK        | K           | N        | 95.00%                                           | 52                                | 799.4094                                   | 2            | 8.4                                |                       |                          |        |                                                                                    | 644              | 656      | No     |        |        |           |       |       |        |      |        |           |       |
| 550                  | IPI00745335 | GPX4     | GLUTATHIONE PEROXIDASE 4 ISOFORM C<br>PRECURSOR. | DIDGHMVNLDK                       | K                                          | Y            | 95.00%                             |                       |                          |        |                                                                                    | 37               | 636.8033 | 2      | 7.2    | 85     | 95        | No    |       |        |      |        |           |       |
|                      |             |          |                                                  | TEVNYTQLVDLHAR                    | K                                          | Y            | 95.00%                             |                       |                          |        |                                                                                    | 35               | 553.6261 | 3      | 7.5    | 113    | 126       | No    |       |        |      |        |           |       |
|                      |             |          |                                                  | YGPMEEPVIEK                       | R                                          | D            | 95.00%                             |                       |                          |        |                                                                                    | 60               | 710.8615 | 2      | 8.1    | 217    | 228       | No    |       |        |      |        |           |       |
|                      |             |          |                                                  | DGLIPLER                          | K                                          | F            | 95.00%                             |                       |                          |        |                                                                                    | 34               | 513.3059 | 2      | 4.0    | 252    | 260       | No    |       |        |      |        |           |       |
|                      |             |          |                                                  | EGSVMLQVDVDTVK                    | R                                          | G            | 95.00%                             |                       |                          |        |                                                                                    | 35               | 768.3892 | 2      | 5.1    | 426    | 439       | No    |       |        |      |        |           |       |
|                      |             |          |                                                  | GGFVLLDGETFEVK                    | K                                          | G            | 95.00%                             |                       |                          |        |                                                                                    | 73               | 755.8995 | 2      | 7.8    | 167    | 180       | No    |       |        |      |        |           |       |
| 551                  | IPI00745729 | SELENBP1 | SELENIUM BINDING PROTEIN 1.                      | GGPVQVLEDEELK                     | K                                          | S            | 95.00%                             |                       |                          |        |                                                                                    | 63               | 706.8714 | 2      | 5.3    | 364    | 376       | No    |       |        |      |        |           |       |
|                      |             |          |                                                  | GGPVQVLEDEELKSQPEPLVVK            | K                                          | G            | 95.00%                             |                       |                          |        |                                                                                    | 72               | 797.4384 | 3      | 7.3    | 364    | 385       | No    |       |        |      |        |           |       |
|                      |             |          |                                                  | HEIVQTLCLK                        | R                                          | D            | 95.00%                             | 65                    | 584.3430                 | 2      | 3.6                                                                                | 242              | 251      | No     |        |        |           |       |       |        |      |        |           |       |
|                      |             |          |                                                  | HNVMIETWAAPNVLK                   | R                                          | D            | 95.00%                             | 61                    | 927.4771                 | 2      | 7.0                                                                                | 202              | 217      | No     |        |        |           |       |       |        |      |        |           |       |
|                      |             |          |                                                  | IYVVDVGSEPR                       | R                                          | A            | 95.00%                             | 79                    | 617.3302                 | 2      | 3.8                                                                                | 110              | 120      | No     |        |        |           |       |       |        |      |        |           |       |
|                      |             |          |                                                  | LNPNFLVDFGK                       | K                                          | E            | 95.00%                             | 69                    | 632.3464                 | 2      | 8.8                                                                                | 444              | 454      | No     |        |        |           |       |       |        |      |        |           |       |
|                      |             |          |                                                  | LNPNFLVDFGKPELGPALAHKLR           | K                                          | Y            | 95.00%                             | 84                    | 849.8018                 | 3      | 6.7                                                                                | 444              | 466      | No     |        |        |           |       |       |        |      |        |           |       |
|                      |             |          |                                                  | LTGQLFLGGSIVK                     | R                                          | G            | 95.00%                             | 105                   | 666.9019                 | 2      | 4.9                                                                                | 351              | 363      | No     |        |        |           |       |       |        |      |        |           |       |
|                      |             |          |                                                  | LVLPSLISSR                        | K                                          | I            | 95.00%                             | 72                    | 542.8426                 | 2      | 4.1                                                                                | 100              | 109      | No     |        |        |           |       |       |        |      |        |           |       |
|                      |             |          |                                                  | NTGTEAPDYLATVDVDPK                | R                                          | S            | 95.00%                             | 104                   | 953.4652                 | 2      | 7.4                                                                                | 41               | 58       | No     |        |        |           |       |       |        |      |        |           |       |
|                      |             |          |                                                  | QFYFDLIR                          | K                                          | E            | 95.00%                             | 31                    | 526.2844                 | 2      | 3.0                                                                                | 418              | 425      | No     |        |        |           |       |       |        |      |        |           |       |

|     |             |      |                                       |                  |   |   |        |     |                |           |   |      |     |     |    |
|-----|-------------|------|---------------------------------------|------------------|---|---|--------|-----|----------------|-----------|---|------|-----|-----|----|
|     |             |      |                                       | VAGGPQMIQLSLDGK  | R | R | 95.00% | 33  | M7: Oxidation  | 765.4089  | 2 | 6.5  | 389 | 403 | No |
|     |             |      |                                       | VAGGPQMIQLSLDGKR | R | L | 95.00% | 36  | M7: Oxidation  | 843.4554  | 2 | 1.2  | 389 | 404 | No |
|     |             |      |                                       | VAGGPQMIQLSLDGKR | R | L | 95.00% | 39  | M7: Oxidation  | 562.6410  | 3 | 3.7  | 389 | 404 | No |
| 552 | IPI00745872 | ALB  | ISOFORM 1 OF SERUM ALBUMIN PRECURSOR. | AEFAEVS          | K | L | 95.00% | 45  |                | 880.4445  | 1 | 3.3  | 250 | 257 | No |
|     |             |      |                                       | AEFAEVS          | K | L | 95.00% | 57  |                | 440.7264  | 2 | 3.8  | 250 | 257 | No |
|     |             |      |                                       | AEFAEVS          | K | V | 95.00% | 58  |                | 825.9559  | 2 | 5.0  | 250 | 264 | No |
|     |             |      |                                       | AEFAEVS          | K | V | 95.00% | 48  |                | 550.9741  | 3 | 6.7  | 250 | 264 | No |
|     |             |      |                                       | AVMDDFAAFVEK     | K | C | 95.00% | 95  | M3: Oxidation  | 679.8226  | 2 | 5.2  | 570 | 581 | No |
|     |             |      |                                       | AVMDDFAAFVEK     | K | C | 95.00% | 44  | M3: Oxidation  | 453.5525  | 3 | 8.5  | 570 | 581 | No |
|     |             |      |                                       | AVMDDFAAFVEK     | K | C | 95.00% | 76  |                | 671.8243  | 2 | 4.0  | 570 | 581 | No |
|     |             |      |                                       | DDNP             | K | L | 95.00% | 45  |                | 940.4522  | 1 | 3.4  | 131 | 138 | No |
|     |             |      |                                       | DDNP             | K | L | 95.00% | 53  |                | 470.7292  | 2 | 1.8  | 131 | 138 | No |
|     |             |      |                                       | DLGEEN           | K | A | 95.00% | 47  |                | 951.4467  | 1 | 4.5  | 37  | 44  | No |
|     |             |      |                                       | DLGEEN           | K | A | 95.00% | 37  |                | 476.2272  | 2 | 4.3  | 37  | 44  | No |
|     |             |      |                                       | DVFLGMFLY        | K | R | 95.00% | 94  | M6: Oxidation  | 820.4003  | 2 | 6.0  | 348 | 360 | No |
|     |             |      |                                       | DVFLGMFLY        | K | R | 95.00% | 51  | M6: Oxidation  | 547.2682  | 3 | 3.6  | 348 | 360 | No |
|     |             |      |                                       | FKDLGEEN         | R | A | 95.00% | 58  |                | 1226.6180 | 1 | 9.8  | 35  | 44  | No |
|     |             |      |                                       | FKDLGEEN         | R | A | 95.00% | 58  |                | 613.8035  | 2 | -5.6 | 35  | 44  | No |
|     |             |      |                                       | FKDLGEEN         | R | A | 95.00% | 48  |                | 409.5415  | 3 | 2.5  | 35  | 44  | No |
|     |             |      |                                       | FQNAL            | K | Y | 95.00% | 34  |                | 960.5679  | 1 | 5.0  | 427 | 434 | No |
|     |             |      |                                       | FQNAL            | K | Y | 95.00% | 60  |                | 480.7861  | 2 | 1.2  | 427 | 434 | No |
|     |             |      |                                       | HPDYS            | R | L | 95.00% | 70  |                | 656.3804  | 2 | 7.8  | 362 | 372 | No |
|     |             |      |                                       | HPDYS            | R | L | 95.00% | 53  |                | 437.9212  | 3 | 4.0  | 362 | 372 | No |
|     |             |      |                                       | HPYFY            | R | R | 95.00% | 62  |                | 871.9568  | 2 | 6.4  | 170 | 183 | No |
|     |             |      |                                       | HPYFY            | R | R | 95.00% | 70  |                | 581.6390  | 3 | 3.9  | 170 | 183 | No |
|     |             |      |                                       | KLVAASQAAL       | K | - | 95.00% | 78  |                | 571.3533  | 2 | 3.7  | 598 | 609 | No |
|     |             |      |                                       | KQTAL            | K | H | 95.00% | 58  |                | 564.8547  | 2 | 1.9  | 549 | 558 | No |
|     |             |      |                                       | KVPQV            | K | N | 95.00% | 111 |                | 820.4772  | 2 | 5.1  | 438 | 452 | No |
|     |             |      |                                       | KVPQV            | K | N | 95.00% | 85  |                | 547.3200  | 3 | 3.7  | 438 | 452 | No |
|     |             |      |                                       | KYLYE            | K | R | 95.00% | 54  |                | 528.3001  | 2 | 3.2  | 161 | 168 | No |
|     |             |      |                                       | LDEL             | K | A | 95.00% | 51  |                | 537.7772  | 2 | 3.1  | 206 | 214 | No |
|     |             |      |                                       | LVAASQAAL        | K | - | 95.00% | 37  |                | 1013.6050 | 1 | 5.4  | 599 | 609 | No |
|     |             |      |                                       | LVAASQAAL        | K | - | 95.00% | 102 |                | 507.3055  | 2 | 3.6  | 599 | 609 | No |
|     |             |      |                                       | LVNEVTE          | K | T | 95.00% | 40  |                | 1149.6250 | 1 | 8.3  | 66  | 75  | No |
|     |             |      |                                       | LVNEVTE          | K | T | 95.00% | 82  |                | 575.3112  | 2 | -1.0 | 66  | 75  | No |
|     |             |      |                                       | LVTDL            | K | V | 95.00% | 45  |                | 789.4758  | 1 | 4.3  | 258 | 264 | No |
|     |             |      |                                       | NYAE             | K | D | 95.00% | 28  |                | 695.3401  | 1 | 5.4  | 342 | 347 | No |
|     |             |      |                                       | PLVEEP           | K | Q | 95.00% | 60  |                | 640.3707  | 2 | 5.5  | 403 | 413 | No |
|     |             |      |                                       | QNCEL            | K | F | 95.00% | 44  |                | 800.8742  | 2 | 5.5  | 414 | 426 | No |
|     |             |      |                                       | QATAL            | K | H | 95.00% | 29  |                | 1000.6110 | 1 | 6.4  | 550 | 558 | No |
|     |             |      |                                       | QATAL            | K | H | 95.00% | 82  |                | 500.8068  | 2 | 1.5  | 550 | 558 | No |
|     |             |      |                                       | RHPDYS           | R | L | 95.00% | 61  |                | 734.4314  | 2 | 7.7  | 361 | 372 | No |
|     |             |      |                                       | RHPDYS           | R | L | 95.00% | 94  |                | 489.9563  | 3 | 6.6  | 361 | 372 | No |
|     |             |      |                                       | RHPYF            | R | R | 95.00% | 79  |                | 950.0098  | 2 | 8.4  | 169 | 183 | No |
|     |             |      |                                       | RHPYF            | R | R | 95.00% | 79  |                | 633.6726  | 3 | 3.3  | 169 | 183 | No |
|     |             |      |                                       | RHPYF            | R | R | 95.00% | 54  |                | 475.5072  | 4 | 5.0  | 169 | 183 | No |
|     |             |      |                                       | RHPYF            | R | Y | 95.00% | 42  |                | 514.5333  | 4 | 6.3  | 169 | 184 | No |
|     |             |      |                                       | SHCIAE           | K | D | 95.00% | 45  | M12: Oxidation | 978.4537  | 3 | 9.1  | 311 | 337 | No |
|     |             |      |                                       | SLHTL            | K | L | 95.00% | 53  |                | 1017.5430 | 1 | 5.8  | 89  | 97  | No |
|     |             |      |                                       | SLHTL            | K | L | 95.00% | 60  |                | 509.2738  | 2 | 2.8  | 89  | 97  | No |
|     |             |      |                                       | TYET             | K | C | 95.00% | 44  |                | 492.7504  | 2 | 4.0  | 376 | 383 | No |
|     |             |      |                                       | VFDEFK           | K | Q | 95.00% | 106 |                | 1023.0590 | 2 | 6.9  | 397 | 413 | No |
|     |             |      |                                       | VFDEFK           | K | Q | 95.00% | 56  |                | 682.3737  | 3 | 4.4  | 397 | 413 | No |
|     |             |      |                                       | VPQV             | K | N | 95.00% | 85  |                | 756.4295  | 2 | 5.2  | 439 | 452 | No |
|     |             |      |                                       | VPQV             | K | N | 95.00% | 56  |                | 504.6211  | 3 | 2.9  | 439 | 452 | No |
|     |             |      |                                       | YLYE             | K | R | 95.00% | 31  |                | 927.4971  | 1 | 3.4  | 162 | 168 | No |
|     |             |      |                                       | YLYE             | K | R | 95.00% | 49  |                | 464.2514  | 2 | 1.1  | 162 | 168 | No |
|     |             |      |                                       | AHDGG            | K | T | 95.00% | 79  |                | 862.4228  | 3 | 9.7  | 232 | 256 | No |
|     |             |      |                                       | FATAS            | R | T | 95.00% | 56  |                | 860.4206  | 2 | 5.9  | 204 | 219 | No |
|     |             |      |                                       | FGAVL            | K | V | 95.00% | 45  |                | 736.7022  | 3 | 8.4  | 127 | 147 | No |
|     |             |      |                                       | IKDIA            | K | I | 95.00% | 34  |                | 731.3954  | 2 | 8.6  | 105 | 116 | No |
|     |             |      |                                       | LHHV             | R | E | 95.00% | 35  |                | 696.6121  | 4 | 4.7  | 576 | 600 | No |
|     |             |      |                                       | LYSIL            | R | L | 95.00% | 85  |                | 769.4307  | 2 | 3.7  | 471 | 484 | No |
|     |             |      |                                       | LYSIL            | R | L | 95.00% | 30  |                | 513.2906  | 3 | 5.4  | 471 | 484 | No |
|     |             |      |                                       | NIDNP            | R | Y | 95.00% | 37  |                | 806.7560  | 3 | 4.5  | 44  | 65  | No |
|     |             |      |                                       | VFASL            | K | G | 95.00% | 38  |                | 573.3218  | 2 | 3.4  | 8   | 17  | No |
| 553 | IPI00746165 | WDR1 | ISOFORM 1 OF WD REPEAT PROTEIN 1.     | DK               | K | T | 95.00% | 79  |                | 862.4228  | 3 | 9.7  | 232 | 256 | No |
|     |             |      |                                       | FATAS            | R | T | 95.00% | 56  |                | 860.4206  | 2 | 5.9  | 204 | 219 | No |
|     |             |      |                                       | FGAVL            | K | V | 95.00% | 45  |                | 736.7022  | 3 | 8.4  | 127 | 147 | No |
|     |             |      |                                       | IKDIA            | K | I | 95.00% | 34  |                | 731.3954  | 2 | 8.6  | 105 | 116 | No |
|     |             |      |                                       | LHHV             | R | E | 95.00% | 35  |                | 696.6121  | 4 | 4.7  | 576 | 600 | No |
|     |             |      |                                       | LYSIL            | R | L | 95.00% | 85  |                | 769.4307  | 2 | 3.7  | 471 | 484 | No |
|     |             |      |                                       | LYSIL            | R | L | 95.00% | 30  |                | 513.2906  | 3 | 5.4  | 471 | 484 | No |
|     |             |      |                                       | NIDNP            | R | Y | 95.00% | 37  |                | 806.7560  | 3 | 4.5  | 44  | 65  | No |
|     |             |      |                                       | VFASL            | K | G | 95.00% | 38  |                | 573.3218  | 2 | 3.4  | 8   | 17  | No |

|     |                          |        |                                                   |                          |   |        |        |     |                                             |           |   |     |       |       |    |  |  |  |
|-----|--------------------------|--------|---------------------------------------------------|--------------------------|---|--------|--------|-----|---------------------------------------------|-----------|---|-----|-------|-------|----|--|--|--|
|     |                          |        |                                                   | VTVFVSADGYSENNVFGHHA     |   |        |        |     |                                             |           |   |     |       |       |    |  |  |  |
|     |                          |        |                                                   | K                        | I | 95.00% | 54     |     |                                             | 847.4194  | 3 | 8.7 | 512   | 534   | No |  |  |  |
|     |                          |        |                                                   | VTVFVSADGYSENNVFGHHA     |   |        |        |     |                                             |           |   |     |       |       |    |  |  |  |
|     |                          |        |                                                   | K                        | I | 95.00% | 39     |     |                                             | 635.8149  | 4 | 6.2 | 512   | 534   | No |  |  |  |
|     |                          |        |                                                   | YAPSGFYASGDVSGK          | K | L      | 95.00% | 119 |                                             | 809.8954  | 2 | 4.8 | 66    | 81    | No |  |  |  |
| 554 | IPI00747355              | PREP   | PROLYL ENDOPEPTIDASE.                             | YTSMLLR                  | R | D      | 95.00% | 29  | M5: Oxidation                               | 450.2390  | 2 | 4.6 | 390   | 396   | No |  |  |  |
|     |                          |        |                                                   | ELPDVLER                 | K | V      | 95.00% | 48  |                                             | 970.5228  | 1 | 1.8 | 163   | 170   | No |  |  |  |
|     |                          |        |                                                   | ELPDVLER                 | K | V      | 95.00% | 38  |                                             | 485.7661  | 2 | 3.5 | 163   | 170   | No |  |  |  |
|     |                          |        |                                                   | FIATLQYVGR               | K | S      | 95.00% | 69  |                                             | 640.8765  | 2 | 6.5 | 652   | 662   | No |  |  |  |
|     |                          |        |                                                   | GIDASDYQTVQIFYPSK        | K | D      | 95.00% | 110 |                                             | 966.4810  | 2 | 7.7 | 429   | 445   | No |  |  |  |
|     |                          |        |                                                   | GMFYNSYPQQDGK            | K | S      | 95.00% | 45  | M2: Oxidation                               | 775.8336  | 2 | 0.6 | 184   | 196   | No |  |  |  |
|     |                          |        |                                                   | HMGGLAVANIR              | R | G      | 95.00% | 63  | M2: Oxidation                               | 634.3538  | 2 | 4.0 | 494   | 505   | No |  |  |  |
|     |                          |        |                                                   | HMGGLAVANIR              | R | G      | 95.00% | 58  | M2: Oxidation                               | 423.2377  | 3 | 2.2 | 494   | 505   | No |  |  |  |
|     |                          |        |                                                   | KQSNPLLIHVDTK            | R | A      | 95.00% | 52  |                                             | 746.9332  | 2 | 6.5 | 665   | 677   | No |  |  |  |
|     |                          |        |                                                   | KQSNPLLIHVDTK            | R | A      | 95.00% | 35  |                                             | 498.2895  | 3 | 2.5 | 665   | 677   | No |  |  |  |
|     |                          |        |                                                   | LIDNFEGEYDYVTNEGTVFTFK   | K | T      | 95.00% | 68  |                                             | 867.7477  | 3 | 9.2 | 282   | 303   | No |  |  |  |
|     |                          |        |                                                   | LPEADDIQYPSMLLLTADHDDR   | K | V      | 95.00% | 66  | M12: Oxidation                              | 848.7422  | 3 | 7.0 | 622   | 643   | No |  |  |  |
|     |                          |        |                                                   | MTELYDYPK                | R | Y      | 95.00% | 41  | M1: Oxidation                               | 588.2718  | 2 | 5.4 | 67    | 75    | No |  |  |  |
|     |                          |        |                                                   | NILQLHDLTTGALLK          | K | T      | 95.00% | 52  |                                             | 825.4893  | 2 | 7.0 | 359   | 373   | No |  |  |  |
|     |                          |        |                                                   | NILQLHDLTTGALLK          | K | T      | 95.00% | 30  |                                             | 550.6618  | 3 | 6.3 | 359   | 373   | No |  |  |  |
|     |                          |        |                                                   | TFPLDVGSIVGYSQGK         | K | K      | 95.00% | 92  |                                             | 834.4423  | 2 | 7.2 | 374   | 389   | No |  |  |  |
|     |                          |        |                                                   | TFPLDVGSIVGYSQGK         | K | K      | 95.00% | 50  |                                             | 556.6283  | 3 | 2.8 | 374   | 389   | No |  |  |  |
|     |                          |        |                                                   | VFLDPNILSDDGTVALR        | R | G      | 95.00% | 130 |                                             | 922.9985  | 2 | 7.1 | 112   | 128   | No |  |  |  |
|     |                          |        |                                                   | VFLDPNILSDDGTVALR        | R | G      | 95.00% | 76  |                                             | 615.6668  | 3 | 4.7 | 112   | 128   | No |  |  |  |
|     |                          |        |                                                   | VIEEVSDFMFAIAR           | K | C      | 95.00% | 46  | M8: Oxidation                               | 821.9170  | 2 | 6.9 | 689   | 702   | No |  |  |  |
|     |                          |        |                                                   | VINIDFRDPEESK            | R | W      | 95.00% | 41  |                                             | 781.4026  | 2 | 7.0 | 313   | 325   | No |  |  |  |
|     |                          |        |                                                   | VINIDFRDPEESKWK          | R | V      | 95.00% | 29  |                                             | 625.9948  | 3 | 4.2 | 313   | 327   | No |  |  |  |
|     |                          |        |                                                   | VLYVQDSLEGEAR            | R | V      | 95.00% | 71  |                                             | 739.8808  | 2 | 3.1 | 99    | 111   | No |  |  |  |
|     |                          |        |                                                   | WMGGAELSDDGR             | K | Y      | 95.00% | 34  | M2: Oxidation                               | 655.2803  | 2 | 3.4 | 234   | 245   | No |  |  |  |
|     |                          |        |                                                   | YFYFYNTGLQNQR            | R | V      | 95.00% | 67  |                                             | 857.4117  | 2 | 7.7 | 86    | 98    | No |  |  |  |
|     |                          |        |                                                   | YVLLSIR                  | R | E      | 95.00% | 42  |                                             | 432.2730  | 2 | 3.3 | 246   | 252   | No |  |  |  |
| 555 | IPI00759493              | SUCLG1 | SUCCINATE-COA LIGASE, GDP-FORMING, ALPHA SUBUNIT. | EKISALQSAGVVMSPAQLGTTIYK | K | E      | 95.00% | 29  | M15: Oxidation                              | 898.8210  | 3 | 3.3 | 313   | 338   | No |  |  |  |
|     |                          |        |                                                   | GGQTHLGLPVFNTVK          | K | E      | 95.00% | 36  |                                             | 784.4412  | 2 | 9.3 | 91    | 105   | No |  |  |  |
|     |                          |        |                                                   | GGQTHLGLPVFNTVK          | K | E      | 95.00% | 29  |                                             | 523.2952  | 3 | 6.5 | 91    | 105   | No |  |  |  |
|     |                          |        |                                                   | IGIMPGHIHK               | K | K      | 95.00% | 34  | M4: Oxidation                               | 559.8155  | 2 | 7.6 | 183   | 192   | No |  |  |  |
|     |                          |        |                                                   | ISALQSAGVVMSPAQLGTTIYK   | K | E      | 95.00% | 74  | M13: Oxidation                              | 813.1135  | 3 | 9.6 | 315   | 338   | No |  |  |  |
|     |                          |        |                                                   | MGHAGAIAGGK              | R | G      | 95.00% | 65  | M1: Oxidation                               | 549.7929  | 2 | 4.3 | 297   | 308   | No |  |  |  |
|     |                          |        |                                                   | QGTFHSQQALEYGTK          | K | L      | 95.00% | 44  |                                             | 847.9175  | 2 | 7.9 | 67    | 81    | No |  |  |  |
|     |                          |        |                                                   | QGTFHSQQALEYGTK          | K | L      | 95.00% | 36  |                                             | 565.6111  | 3 | 2.2 | 67    | 81    | No |  |  |  |
|     |                          |        |                                                   | RMGHAGAIAGGK             | R | G      | 95.00% | 49  | M2: Oxidation                               | 418.8986  | 3 | 4.6 | 296   | 308   | No |  |  |  |
| 556 | IPI00759542; IPI00759754 | TTN    | ISOFORM 8 OF TITIN.; ISOFORM 1 OF TITIN.          | AGDTIVLNAISILGKPLPK      | K | S      | 95.00% | 26  |                                             | 640.7288  | 3 | 8.8 | 21443 | 21461 | No |  |  |  |
|     |                          |        |                                                   | ATSTAELLVQGEDEVPAKK      | R | T      | 95.00% | 34  |                                             | 667.3629  | 3 | 8.8 | 185   | 203   | No |  |  |  |
|     |                          |        |                                                   | TIVSTAQISESR             | K | Q      | 95.00% | 55  |                                             | 646.3512  | 2 | 6.9 | 206   | 217   | No |  |  |  |
|     |                          |        |                                                   | VGTGEPVETDNPVEAR         | R | S      | 95.00% | 57  |                                             | 835.4119  | 2 | 7.5 | 14221 | 14236 | No |  |  |  |
|     |                          |        |                                                   | VTGIPTPVVK               | R | F      | 95.00% | 21  |                                             | 505.8200  | 2 | 7.0 | 127   | 136   | No |  |  |  |
| 557 | IPI00783128              | FLNC   | GAMMA FILAMIN VARIANT.                            | AEIAFEDR                 | K | K      | 95.00% | 39  |                                             | 950.4654  | 1 | 7.4 | 2337  | 2344  | No |  |  |  |
|     |                          |        |                                                   | AEIAFEDR                 | K | K      | 95.00% | 42  |                                             | 475.7347  | 2 | 3.3 | 2337  | 2344  | No |  |  |  |
|     |                          |        |                                                   | AEIAFEDRK                | K | D      | 95.00% | 39  |                                             | 539.7845  | 2 | 7.1 | 2337  | 2345  | No |  |  |  |
|     |                          |        |                                                   | AFGPGLEGGLVNK            | R | A      | 95.00% | 98  |                                             | 629.8481  | 2 | 6.8 | 1335  | 1347  | No |  |  |  |
|     |                          |        |                                                   | AGTNMMMVGVHGP            | K | T      | 95.00% | 36  | M5: Oxidation, M6: Oxidation, M7: Oxidation | 739.3388  | 2 | 6.4 | 2643  | 2656  | No |  |  |  |
|     |                          |        |                                                   | AGTNMMMVGVHGP            | K | T      | 95.00% | 39  | M5: Oxidation, M6: Oxidation, M7: Oxidation | 493.2277  | 3 | 4.9 | 2643  | 2656  | No |  |  |  |
|     |                          |        |                                                   | AKLDVQFAGTAK             | K | G      | 95.00% | 60  |                                             | 624.8552  | 2 | 5.8 | 880   | 891   | No |  |  |  |
|     |                          |        |                                                   | AKLDVQFAGTAK             | K | G      | 95.00% | 46  |                                             | 416.9054  | 3 | 4.2 | 880   | 891   | No |  |  |  |
|     |                          |        |                                                   | APLQVAVLGPTGVAEPEVVR     | R | D      | 95.00% | 124 |                                             | 1001.5790 | 2 | 7.7 | 1455  | 1474  | No |  |  |  |
|     |                          |        |                                                   | APLQVAVLGPTGVAEPEVVR     | R | D      | 95.00% | 61  |                                             | 668.0552  | 3 | 8.0 | 1455  | 1474  | No |  |  |  |
|     |                          |        |                                                   | ASGPGLNASGIPASLPVEFTIDAR | R | D      | 95.00% | 39  |                                             | 780.7512  | 3 | 7.5 | 1524  | 1547  | No |  |  |  |
|     |                          |        |                                                   | ATIRPVFDPSK              | K | V      | 95.00% | 39  |                                             | 615.8511  | 2 | 7.8 | 1127  | 1137  | No |  |  |  |
|     |                          |        |                                                   | ATIRPVFDPSK              | K | V      | 95.00% | 38  |                                             | 410.9016  | 3 | 3.6 | 1127  | 1137  | No |  |  |  |
|     |                          |        |                                                   | AWGPGLETGQVVK            | R | S      | 95.00% | 89  |                                             | 650.3431  | 2 | 6.5 | 556   | 568   | No |  |  |  |
|     |                          |        |                                                   | DAGEGGLSLAVEGPKS         | K | A      | 95.00% | 123 |                                             | 743.8774  | 2 | 5.2 | 1866  | 1881  | No |  |  |  |
|     |                          |        |                                                   | DAGEGLLTQILDPEGPKPK      | R | K      | 95.00% | 102 |                                             | 990.5425  | 2 | 5.7 | 1548  | 1566  | No |  |  |  |
|     |                          |        |                                                   | DAGEGLLTQILDPEGPKPK      | R | K      | 95.00% | 49  |                                             | 660.6998  | 3 | 9.1 | 1548  | 1566  | No |  |  |  |
|     |                          |        |                                                   | DFEIDNHDYSYTVK           | R | Y      | 95.00% | 104 |                                             | 929.9362  | 2 | 7.7 | 897   | 911   | No |  |  |  |

|                         |   |   |        |     |                |           |   |     |      |      |     |
|-------------------------|---|---|--------|-----|----------------|-----------|---|-----|------|------|-----|
| DLAEDAPWK               | K | K | 95.00% | 35  |                | 522.7562  | 2 | 4.0 | 7    | 15   | Yes |
| DNGDGHVHYTPATDGPYTVAVK  | R | Y | 95.00% | 59  |                | 839.3979  | 3 | 3.4 | 1475 | 1498 | No  |
| DNMGDTYTVSYLPDMSGR      | R | Y | 95.00% | 93  | M15: Oxidation | 982.4302  | 2 | 9.2 | 1572 | 1589 | No  |
| DTVEVALEDK              | R | G | 95.00% | 55  |                | 1118.5630 | 1 | 3.8 | 402  | 411  | No  |
| DTVEVALEDK              | R | G | 95.00% | 53  |                | 559.7844  | 2 | 2.4 | 402  | 411  | No  |
| DTVEVALEDKGDSTFR        | R | C | 95.00% | 34  |                | 891.4362  | 2 | 4.8 | 402  | 417  | No  |
| DTVEVALEDKGDSTFR        | R | C | 95.00% | 54  |                | 594.6267  | 3 | 4.8 | 402  | 417  | No  |
| EAGAGGLSIAVEGPSK        | R | A | 95.00% | 113 |                | 721.8819  | 2 | 4.7 | 2321 | 2336 | Yes |
| EKGDIYILVK              | K | W | 95.00% | 29  |                | 589.3495  | 2 | 6.5 | 2680 | 2689 | No  |
| EVTTEFTVDAR             | R | S | 95.00% | 45  |                | 1267.6280 | 1 | 8.3 | 1248 | 1258 | No  |
| EVTTEFTVDAR             | R | S | 95.00% | 89  |                | 634.3160  | 2 | 5.6 | 1248 | 1258 | No  |
| FADKHVPGSPFTVK          | K | V | 95.00% | 46  |                | 765.4158  | 2 | 7.9 | 2094 | 2107 | No  |
| FADKHVPGSPFTVK          | K | V | 95.00% | 29  |                | 510.6121  | 3 | 5.7 | 2094 | 2107 | No  |
| FDDKHIPGSPFTAK          | R | I | 95.00% | 38  |                | 520.6034  | 3 | 5.6 | 1912 | 1925 | No  |
| FNDEHIPDSPFVVPVASLSDDAR | K | R | 95.00% | 68  |                | 843.0810  | 3 | 6.7 | 2367 | 2389 | No  |
| FNDEHIPDSPFVVPVASLSDDAR | R |   |        |     |                |           |   |     |      |      |     |
| FNDEHIPDSPFVVPVASLSDDAR | K | L | 95.00% | 33  |                | 895.1133  | 3 | 4.7 | 2367 | 2390 | No  |
| R                       | K | L | 95.00% | 57  |                | 671.5864  | 4 | 3.9 | 2367 | 2390 | No  |
| FNGAHIPGSPFK            | K | I | 95.00% | 39  |                | 636.3336  | 2 | 4.4 | 2462 | 2473 | No  |
| FVPQEMGPHTVAVK          | R | Y | 95.00% | 38  | M6: Oxidation  | 778.4025  | 2 | 1.8 | 2258 | 2271 | No  |
| GAGGGQLDVR              | R | M | 95.00% | 69  |                | 529.2767  | 2 | 6.0 | 972  | 982  | No  |
| GAGTGGLGLAIEGPSEAK      | R | M | 95.00% | 122 |                | 792.9179  | 2 | 2.7 | 1357 | 1374 | No  |
| GAGTGGLGLAIEGPSEAK      | R | M | 95.00% | 34  |                | 528.9495  | 3 | 5.9 | 1357 | 1374 | No  |
| GDYILIVK                | K | W | 95.00% | 23  |                | 920.5538  | 1 | 8.7 | 2682 | 2689 | No  |
| GDYILIVK                | K | W | 95.00% | 45  |                | 460.7792  | 2 | 5.2 | 2682 | 2689 | No  |
| GEVVRDFEIIDNHDSYTVK     | K | Y | 95.00% | 36  |                | 800.3948  | 3 | 7.2 | 892  | 911  | No  |
| GGLVGTAPFASIDTK         | K | G | 95.00% | 82  |                | 730.4005  | 2 | 9.0 | 1054 | 1068 | No  |
| GLSEGHTFQVAEFVDTR       | K | N | 95.00% | 66  |                | 669.3414  | 3 | 5.0 | 2030 | 2047 | No  |
| GPGLSQAFVGQK            | R | N | 95.00% | 79  |                | 594.8259  | 2 | 5.1 | 2622 | 2633 | No  |
| GQHVPGPSFQFTVGPLGEGGA   |   |   |        |     |                |           |   |     |      |      |     |
| HK                      | R | V | 95.00% | 48  |                | 768.7294  | 3 | 8.7 | 2274 | 2296 | No  |
| GQHVPGPSFQFTVGPLGEGGA   |   |   |        |     |                |           |   |     |      |      |     |
| HK                      | R | V | 95.00% | 53  |                | 576.7983  | 4 | 7.5 | 2274 | 2296 | No  |
| GVAGVPAEFSIWTR          | R | E | 95.00% | 62  |                | 745.4005  | 2 | 8.6 | 2307 | 2320 | No  |
| GVAGVPAEFSIWTR          | R | E | 95.00% | 54  |                | 497.2699  | 3 | 9.1 | 2307 | 2320 | No  |
| HIGISFTPK               | R | E | 95.00% | 43  |                | 999.5707  | 1 | 7.8 | 1980 | 1988 | No  |
| HIGISFTPK               | R | E | 95.00% | 46  |                | 500.2882  | 2 | 5.7 | 1980 | 1988 | No  |
| HTIIISWGGVNVPK          | K | S | 95.00% | 90  |                | 760.9391  | 2 | 7.5 | 718  | 731  | No  |
| HTIIISWGGVNVPK          | K | S | 95.00% | 44  |                | 507.6274  | 3 | 4.9 | 718  | 731  | No  |
| IHALPTGDASK             | R | C | 95.00% | 28  |                | 555.3066  | 2 | 8.8 | 1608 | 1618 | No  |
| ILVGPSEIGDASK           | K | V | 95.00% | 82  |                | 643.3567  | 2 | 4.0 | 2011 | 2023 | No  |
| IPGNWFQMVSAQER          | K | L | 95.00% | 78  | M8: Oxidation  | 839.9113  | 2 | 8.1 | 2140 | 2153 | No  |
| IQIGQETVITVDAK          | R | A | 95.00% | 104 |                | 757.9312  | 2 | 7.5 | 1638 | 1651 | No  |
| IQQNTFTR                | K | W | 95.00% | 44  |                | 504.2695  | 2 | 3.8 | 17   | 24   | Yes |
| ITESDLSQLTASIR          | K | A | 95.00% | 88  |                | 767.4159  | 2 | 7.4 | 1949 | 1962 | No  |
| ITESDLSQLTASIR          | K | A | 95.00% | 46  |                | 511.9456  | 3 | 5.7 | 1949 | 1962 | No  |
| LDVQFAGTAK              | K | G | 95.00% | 69  |                | 525.2868  | 2 | 2.3 | 882  | 891  | No  |
| LENVSVALEFLER           | K | E | 95.00% | 98  |                | 759.9173  | 2 | 6.5 | 77   | 89   | No  |
| LENVSVALEFLER           | K | E | 95.00% | 74  |                | 506.9472  | 3 | 6.0 | 77   | 89   | No  |
| LEPGGGAEQAQVR           | K | Y | 95.00% | 88  |                | 627.8296  | 2 | 5.6 | 995  | 1007 | No  |
| LGSFGSITR               | R | Q | 95.00% | 48  | S3: Phospho    | 509.2448  | 2 | 4.7 | 2211 | 2219 | No  |
| LGSFGSITR               | R | Q | 95.00% | 65  |                | 469.2605  | 2 | 2.7 | 2211 | 2219 | No  |
| LIALLEVLISQK            | R | R | 95.00% | 103 |                | 613.8940  | 2 | 6.3 | 50   | 60   | Yes |
| LIALLEVLISQK            | R | R | 95.00% | 43  |                | 409.5984  | 3 | 5.8 | 50   | 60   | Yes |
| LIALLEVLISQKR           | R | M | 95.00% | 80  |                | 691.9463  | 2 | 8.0 | 50   | 61   | Yes |
| LIALLEVLISQKR           | R | M | 95.00% | 60  |                | 461.6314  | 3 | 3.5 | 50   | 61   | Yes |
| LLGWIQNK                | R | V | 95.00% | 66  |                | 486.2895  | 2 | 3.5 | 145  | 152  | No  |
| LSGGHSLHETSTVLVETVK     | R | S | 95.00% | 126 |                | 1048.0630 | 2 | 6.6 | 2577 | 2596 | No  |
| LSGGHSLHETSTVLVETVK     | R | S | 95.00% | 85  |                | 699.0456  | 3 | 8.5 | 2577 | 2596 | No  |
| LSGGHSLHETSTVLVETVK     | R | S | 95.00% | 51  |                | 524.5341  | 4 | 4.5 | 2577 | 2596 | No  |
| LTVTSLQETGLK            | R | V | 95.00% | 93  |                | 645.3739  | 2 | 6.2 | 2391 | 2402 | No  |
| NAGYGGGLSIEGPSK         | R | V | 95.00% | 82  |                | 760.3980  | 2 | 8.1 | 2048 | 2063 | No  |
| PNITDNKDGTTIVR          | R | Y | 95.00% | 52  |                | 515.2775  | 3 | 5.6 | 1792 | 1805 | No  |
| QGEASSQDMTAQVTPSPGK     | R | V | 95.00% | 89  | M11: Oxidation | 1091.4920 | 2 | 8.5 | 2220 | 2240 | No  |
| QGEASSQDMTAQVTPSPGK     | R | V | 95.00% | 69  | M11: Oxidation | 727.9937  | 3 | 3.9 | 2220 | 2240 | No  |





|     |                          |      |                                          |                          |   |   |        |     |                              |           |   |      |      |      |     |
|-----|--------------------------|------|------------------------------------------|--------------------------|---|---|--------|-----|------------------------------|-----------|---|------|------|------|-----|
|     |                          |      |                                          | GKDPLMYFIEK              | R | S | 95.00% | 36  | M6: Oxidation                | 678.8515  | 2 | 5.6  | 538  | 548  | No  |
|     |                          |      |                                          | GKDPLMYFIEK              | R | S | 95.00% | 29  | M6: Oxidation                | 452.9042  | 3 | 6.8  | 538  | 548  | No  |
|     |                          |      |                                          | GKDPLMYFIEK              | R | S | 95.00% | 60  |                              | 670.8530  | 2 | 4.1  | 538  | 548  | No  |
|     |                          |      |                                          | GQDVSILEIAGK             | R | V | 95.00% | 92  |                              | 615.3443  | 2 | 5.3  | 1207 | 1218 | No  |
|     |                          |      |                                          | GVTSEDSGKYSINIK          | K | N | 95.00% | 87  |                              | 799.4121  | 2 | 5.6  | 1405 | 1419 | No  |
|     |                          |      |                                          | HGEKIPDMAPPQQAQK         | K | P | 95.00% | 32  | M8: Oxidation                | 554.9497  | 3 | 3.5  | 1436 | 1450 | No  |
|     |                          |      |                                          | HGEKIPDMAPPQQAQPK        | K | L | 95.00% | 39  | M8: Oxidation                | 629.9986  | 3 | 2.5  | 1436 | 1452 | No  |
|     |                          |      |                                          | HGEKIPDMAPPQQAQPK        | K | L | 95.00% | 35  | M8: Oxidation                | 472.7508  | 4 | 2.3  | 1436 | 1452 | No  |
|     |                          |      |                                          | HGLSEPSEITSPPIQAQDVTVVPS |   |   |        |     |                              |           |   |      |      |      |     |
|     |                          |      |                                          | APGR                     | R | V | 95.00% | 73  |                              | 924.8177  | 3 | 7.5  | 591  | 617  | No  |
|     |                          |      |                                          | HGLSEPSEITSPPIQAQDVTVVPS |   |   |        |     |                              |           |   |      |      |      |     |
|     |                          |      |                                          | APGR                     | R | V | 95.00% | 33  |                              | 693.8661  | 4 | 8.7  | 591  | 617  | No  |
|     |                          |      |                                          | IAAVNLGIGEPSDPSEHFK      | K | C | 95.00% | 77  |                              | 684.6895  | 3 | 6.2  | 785  | 804  | No  |
|     |                          |      |                                          | IDVTVSVYK                | K | H | 95.00% | 48  |                              | 512.2917  | 2 | 2.8  | 1427 | 1435 | No  |
|     |                          |      |                                          | IESNYGVHTLEINR           | R | A | 95.00% | 86  |                              | 822.9254  | 2 | 5.1  | 205  | 218  | No  |
|     |                          |      |                                          | IESNYGVHTLEINR           | R | A | 95.00% | 53  |                              | 548.9517  | 3 | 3.0  | 205  | 218  | No  |
|     |                          |      |                                          | IPDMAPPQQAQK             | K | P | 95.00% | 49  | M4: Oxidation                | 606.3115  | 2 | 4.6  | 1440 | 1450 | No  |
|     |                          |      |                                          | IPDMAPPQQAQPK            | K | L | 95.00% | 58  | M4: Oxidation                | 718.8844  | 2 | 2.5  | 1440 | 1452 | No  |
|     |                          |      |                                          | IPDMAPPQQAQPK            | K | L | 95.00% | 40  | M4: Oxidation                | 479.5919  | 3 | 1.8  | 1440 | 1452 | No  |
|     |                          |      |                                          | LIGGLPDVVTIMEGK          | R | T | 95.00% | 64  | M12: Oxidation               | 779.4380  | 2 | 7.5  | 1344 | 1358 | No  |
|     |                          |      |                                          | LIGGLPDVVTIMEGK          | R | T | 95.00% | 34  | M12: Oxidation               | 519.9611  | 3 | 7.1  | 1344 | 1358 | No  |
|     |                          |      |                                          | LIGGLPDVVTIMEGK          | R | T | 95.00% | 40  |                              | 771.4376  | 2 | 3.7  | 1344 | 1358 | No  |
|     |                          |      |                                          | LIPASASAAGQ              | K | - | 95.00% | 30  |                              | 985.5400  | 1 | 8.2  | 1453 | 1463 | No  |
|     |                          |      |                                          | LIPASASAAGQ              | K | - | 95.00% | 51  |                              | 493.2714  | 2 | 3.2  | 1453 | 1463 | No  |
|     |                          |      |                                          | LMALSNEIKNPTIPLK         | R | S | 95.00% | 65  | M2: Oxidation                | 899.5167  | 2 | 5.7  | 1004 | 1019 | No  |
|     |                          |      |                                          | LMALSNEIKNPTIPLK         | R | S | 95.00% | 50  | M2: Oxidation                | 600.0130  | 3 | 4.5  | 1004 | 1019 | No  |
|     |                          |      |                                          | NDQDIQLSEHFSVK           | K | V | 95.00% | 81  |                              | 830.4094  | 2 | 8.0  | 1379 | 1392 | No  |
|     |                          |      |                                          | NPTIPLKSELAIEIFDK        | K | G | 95.00% | 63  |                              | 989.5391  | 2 | 8.3  | 1013 | 1029 | No  |
|     |                          |      |                                          | NPTIPLKSELAIEIFDK        | K | G | 95.00% | 32  |                              | 660.0280  | 3 | 7.3  | 1013 | 1029 | No  |
|     |                          |      |                                          | NYVVLSWEPPTPR            | R | G | 95.00% | 74  |                              | 779.4136  | 2 | 8.1  | 525  | 537  | No  |
|     |                          |      |                                          | SELAYEIFDK               | K | G | 95.00% | 55  |                              | 607.8030  | 2 | 3.0  | 1020 | 1029 | No  |
|     |                          |      |                                          | SLDLSGQAFDEAFEFQQFK      | R | A | 95.00% | 86  |                              | 760.0324  | 3 | 6.4  | 1315 | 1334 | No  |
|     |                          |      |                                          | SQSSLVLIGDAFK            | K | T | 95.00% | 104 |                              | 682.8791  | 2 | 5.7  | 1099 | 1111 | No  |
|     |                          |      |                                          | SYEEISDDER               | K | F | 95.00% | 36  |                              | 621.7623  | 2 | 3.4  | 946  | 955  | No  |
|     |                          |      |                                          | TSVVVQWDRPK              | K | H | 95.00% | 56  |                              | 657.8680  | 2 | 8.4  | 626  | 636  | No  |
|     |                          |      |                                          | TSVVVQWDRPK              | K | H | 95.00% | 39  |                              | 438.9125  | 3 | 3.4  | 626  | 636  | No  |
|     |                          |      |                                          | TVLEEAEFQR               | K | K | 95.00% | 65  |                              | 611.3124  | 2 | 4.4  | 1112 | 1121 | No  |
|     |                          |      |                                          | TVLEEAEFQRK              | K | E | 95.00% | 57  |                              | 675.3597  | 2 | 3.7  | 1112 | 1122 | No  |
|     |                          |      |                                          | VSDAVAALDPLDLR           | R | R | 95.00% | 70  |                              | 727.9003  | 2 | 5.0  | 471  | 484  | No  |
|     |                          |      |                                          | VSDAVAALDPLDLR           | R | R | 95.00% | 48  |                              | 485.6024  | 3 | 4.2  | 471  | 484  | No  |
|     |                          |      |                                          | VSDAVAALDPLDLRR          | R | L | 95.00% | 62  |                              | 537.6361  | 3 | 3.7  | 471  | 485  | No  |
|     |                          |      |                                          | WLKDDVLYETETLPNLER       | K | G | 95.00% | 99  |                              | 1117.5790 | 2 | 6.4  | 1163 | 1180 | No  |
|     |                          |      |                                          | WLKDDVLYETETLPNLER       | K | G | 95.00% | 34  |                              | 745.3889  | 3 | 7.3  | 1163 | 1180 | No  |
|     |                          |      |                                          | YAIQQMMEDK               | K | L | 95.00% | 51  | M6: Oxidation, M7: Oxidation | 644.7850  | 2 | 5.3  | 129  | 138  | No  |
|     |                          |      |                                          | YAVFDLMEGK               | R | S | 95.00% | 46  | M7: Oxidation                | 594.7873  | 2 | 4.8  | 570  | 579  | No  |
|     |                          |      |                                          | YAVFDLMEGK               | R | S | 95.00% | 43  |                              | 586.7902  | 2 | 5.4  | 570  | 579  | No  |
|     |                          |      |                                          | YLLDEYASK                | R | K | 95.00% | 43  |                              | 551.2787  | 2 | 2.3  | 27   | 35   | No  |
|     |                          |      |                                          | YPVTGLFEGR               | K | S | 95.00% | 65  |                              | 569.7942  | 2 | -8.0 | 442  | 451  | No  |
|     |                          |      |                                          | YQSLVAAYGEAK             | R | R | 95.00% | 57  |                              | 650.3359  | 2 | 4.1  | 89   | 100  | No  |
|     |                          |      |                                          | YTFEIFDGK                | K | D | 95.00% | 38  |                              | 560.2770  | 2 | 8.8  | 1301 | 1309 | No  |
|     |                          |      |                                          | YTFEIFDGKDNHQR           | K | S | 95.00% | 75  |                              | 885.4234  | 2 | 8.0  | 1301 | 1314 | No  |
|     |                          |      |                                          | YTFEIFDGKDNHQR           | K | S | 95.00% | 31  |                              | 443.2147  | 4 | 5.9  | 1301 | 1314 | No  |
| 565 | IPI00020599; IPI00793605 | CALR | CALRETICULIN PRECURSOR.; 37 KDA PROTEIN. | EQFLDGDGWTSR             | K | W | 95.00% | 71  |                              | 705.8215  | 2 | 4.3  | 25   | 36   | No  |
|     |                          |      |                                          | FYALSASFEPFSNK           | R | G | 95.00% | 33  |                              | 804.3989  | 2 | 9.6  | 74   | 87   | No  |
|     |                          |      |                                          | FYGDDEEKDKGLQTSQDAR      | K | F | 95.00% | 49  |                              | 696.3294  | 3 | 2.1  | 56   | 73   | No  |
|     |                          |      |                                          | KVHVIFNYK                | K | G | 95.00% | 25  |                              | 574.3373  | 2 | 3.4  | 143  | 151  | No  |
| 566 | IPI00794080              |      | 227 KDA PROTEIN.                         | ADIAESQVNK               | R | L | 95.00% | 52  |                              | 1074.5510 | 1 | 7.4  | 1939 | 1948 | Yes |
|     |                          |      |                                          | ADIAESQVNK               | R | L | 95.00% | 79  |                              | 537.7779  | 2 | 4.4  | 1939 | 1948 | Yes |
|     |                          |      |                                          | ADIAESQVNLKLR            | R | A | 95.00% | 34  |                              | 448.5825  | 3 | 2.7  | 1939 | 1950 | Yes |
|     |                          |      |                                          | AEDEEEINAELTAK           | R | K | 95.00% | 117 |                              | 781.3685  | 2 | 3.7  | 934  | 947  | Yes |
|     |                          |      |                                          | AEDEEEINAELTAK           | R | K | 95.00% | 68  |                              | 521.2492  | 3 | 5.5  | 934  | 947  | Yes |
|     |                          |      |                                          | AITDAAMMAEELK            | K | K | 95.00% | 86  | M7: Oxidation, M8: Oxidation | 713.3404  | 2 | 8.6  | 1770 | 1782 | Yes |
|     |                          |      |                                          | AITDAAMMAEELK            | K | K | 95.00% | 45  | M7: Oxidation, M8: Oxidation | 475.8937  | 3 | 3.3  | 1770 | 1782 | Yes |
|     |                          |      |                                          | AITDAAMMAEELKK           | K | E | 95.00% | 102 | M7: Oxidation                | 769.3866  | 2 | 3.0  | 1770 | 1783 | Yes |
|     |                          |      |                                          | AITDAAMMAEELKK           | K | E | 95.00% | 43  | M7: Oxidation                | 513.2605  | 3 | 3.3  | 1770 | 1783 | Yes |
|     |                          |      |                                          | AITDAAMMAEELKK           | K | E | 95.00% | 83  | M7: Oxidation                | 777.3852  | 2 | 4.5  | 1770 | 1783 | Yes |

|                         |   |   |        |     |                              |           |   |      |      |      |     |
|-------------------------|---|---|--------|-----|------------------------------|-----------|---|------|------|------|-----|
| AITDAAMMAEELKK          | K | E | 95.00% | 52  | M7: Oxidation                | 518.5913  | 3 | 1.7  | 1770 | 1783 | Yes |
| AITDAAMMAEELKK          | K | E | 95.00% | 83  | M7: Oxidation, M8: Oxidation | 777.3852  | 2 | 4.5  | 1770 | 1783 | Yes |
| AITDAAMMAEELKK          | K | E | 95.00% | 52  | M7: Oxidation, M8: Oxidation | 518.5913  | 3 | 1.7  | 1770 | 1783 | Yes |
| AITDAAMMAEELKK          | K | E | 95.00% | 97  | M8: Oxidation                | 769.3875  | 2 | 4.2  | 1770 | 1783 | Yes |
| AITDAAMMAEELKK          | K | E | 95.00% | 48  | M8: Oxidation                | 513.2620  | 3 | 6.3  | 1770 | 1783 | Yes |
| AITDAAMMAEELKK          | K | E | 95.00% | 64  |                              | 761.3915  | 2 | 6.1  | 1770 | 1783 | Yes |
| AITDAAMMAEELKK          | K | E | 95.00% | 61  |                              | 507.9294  | 3 | 4.5  | 1770 | 1783 | Yes |
| AITDAAMMAEELKKEQDTSAHLE |   |   |        |     | M7: Oxidation, M8: Oxidation |           |   |      |      |      |     |
| R                       | K | M | 95.00% | 37  |                              | 907.4404  | 3 | 6.9  | 1770 | 1793 | Yes |
| ALQEAHQALDDLQAEEDK      | K | V | 95.00% | 48  |                              | 718.0157  | 3 | 7.1  | 1006 | 1024 | Yes |
| ANSEVAQWR               | K | T | 95.00% | 51  |                              | 1060.5270 | 1 | 9.1  | 1376 | 1384 | Yes |
| ANSEVAQWR               | K | T | 95.00% | 62  |                              | 530.7650  | 2 | 4.5  | 1376 | 1384 | Yes |
| ATLEQTER                | R | A | 95.00% | 60  |                              | 474.2459  | 2 | 4.3  | 1702 | 1709 | No  |
| DIDDLELTLAK             | K | V | 95.00% | 51  |                              | 1245.6700 | 1 | 9.1  | 961  | 971  | Yes |
| DIDDLELTLAK             | K | V | 95.00% | 99  |                              | 623.3293  | 2 | -5.9 | 961  | 971  | Yes |
| DLEEATLQHEAMVAALR       | R | K | 95.00% | 46  |                              | 948.9764  | 2 | -2.1 | 1185 | 1201 | Yes |
| DLQHRLEAEQLALK          | K | G | 95.00% | 31  |                              | 889.9805  | 2 | 7.2  | 1804 | 1818 | Yes |
| DLQHRLEAEQLALK          | K | G | 95.00% | 48  |                              | 593.6563  | 3 | 7.3  | 1804 | 1818 | Yes |
| DPLNETVVGlyQK           | K | S | 95.00% | 91  |                              | 738.3958  | 2 | 6.1  | 607  | 619  | Yes |
| DTQLHLDDALR             | K | G | 95.00% | 86  |                              | 648.8323  | 2 | 1.4  | 1664 | 1674 | No  |
| DTQLHLDDALR             | K | G | 95.00% | 38  |                              | 432.8916  | 3 | 3.3  | 1664 | 1674 | No  |
| EEQAEPDGTEVADK          | R | T | 95.00% | 98  |                              | 759.3368  | 2 | 3.3  | 371  | 384  | No  |
| ELEELSER                | R | L | 95.00% | 49  |                              | 1004.4910 | 1 | 0.9  | 1150 | 1157 | No  |
| ELEELSER                | R | L | 95.00% | 42  |                              | 502.7503  | 2 | 2.7  | 1150 | 1157 | No  |
| EMATMKEEFQK             | K | T | 95.00% | 38  | M2: Oxidation                | 694.3185  | 2 | 3.9  | 856  | 866  | Yes |
| EMATMKEEFQK             | K | T | 95.00% | 35  | M2: Oxidation                | 702.3164  | 2 | 4.5  | 856  | 866  | Yes |
| EMATMKEEFQK             | K | T | 95.00% | 34  | M2: Oxidation                | 468.5471  | 3 | 5.0  | 856  | 866  | Yes |
| EMATMKEEFQK             | K | T | 95.00% | 37  | M2: Oxidation, M5: Oxidation | 702.3176  | 2 | 6.3  | 856  | 866  | Yes |
| EMATMKEEFQK             | K | T | 95.00% | 35  | M2: Oxidation, M5: Oxidation | 468.5475  | 3 | 5.8  | 856  | 866  | Yes |
| EMATMKEEFQK             | K | T | 95.00% | 54  |                              | 686.3251  | 2 | 9.8  | 856  | 866  | Yes |
| ENQSILITGESGAGK         | R | T | 95.00% | 118 |                              | 752.3882  | 2 | 1.9  | 171  | 185  | Yes |
| ENQSILITGESGAGK         | R | T | 95.00% | 46  |                              | 501.9288  | 3 | 3.5  | 171  | 185  | Yes |
| EQDTSAHLE               | K | M | 95.00% | 69  |                              | 593.2841  | 2 | 8.6  | 1784 | 1793 | Yes |
| ESIVSQLSR               | K | S | 95.00% | 63  |                              | 509.7831  | 2 | 5.0  | 1307 | 1315 | No  |
| EVTERAEDEEEINAELTAK     | K | K | 95.00% | 123 |                              | 1088.5220 | 2 | 4.6  | 929  | 947  | Yes |
| EVTERAEDEEEINAELTAK     | K | K | 95.00% | 64  |                              | 726.0180  | 3 | 5.7  | 929  | 947  | Yes |
| GSSFQTVSALFR            | K | E | 95.00% | 99  |                              | 650.3406  | 2 | 2.9  | 649  | 660  | Yes |
| GSSFQTVSALFR            | K | E | 95.00% | 47  |                              | 433.8970  | 3 | 4.3  | 649  | 660  | Yes |
| GTLEDQIISANPLLEAFGNK    | K | T | 95.00% | 33  |                              | 734.3816  | 3 | -7.3 | 215  | 235  | No  |
| HADSVaelGEQIDNLR        | K | V | 95.00% | 159 |                              | 947.9762  | 2 | 9.8  | 1204 | 1220 | Yes |
| HADSVaelGEQIDNLR        | K | V | 95.00% | 85  |                              | 632.3179  | 3 | 6.4  | 1204 | 1220 | Yes |
| IEEEEEIEAER             | R | A | 95.00% | 103 |                              | 744.8617  | 2 | 5.7  | 1123 | 1134 | Yes |
| IEEEEEIEAER             | R | A | 95.00% | 66  |                              | 496.9096  | 3 | 4.0  | 1123 | 1134 | Yes |
| IHFQTTGK                | R | L | 95.00% | 46  |                              | 860.4694  | 1 | 7.2  | 251  | 258  | Yes |
| IHFQTTGK                | R | L | 95.00% | 29  |                              | 430.7379  | 2 | 5.7  | 251  | 258  | Yes |
| IKELQAR                 | K | I | 95.00% | 29  |                              | 429.2678  | 2 | 8.1  | 1116 | 1122 | Yes |
| IKEVTERAEDEEEINAELTAK   | K | K | 95.00% | 89  |                              | 1209.1170 | 2 | 8.5  | 927  | 947  | Yes |
| IKEVTERAEDEEEINAELTAK   | K | K | 95.00% | 80  |                              | 806.4133  | 3 | 8.1  | 927  | 947  | Yes |
| IKEVTERAEDEEEINAELTAK   | K | K | 95.00% | 50  |                              | 605.0596  | 4 | 4.3  | 927  | 947  | Yes |
| INQLDTK                 | R | L | 95.00% | 52  |                              | 480.2627  | 2 | 1.3  | 444  | 451  | No  |
| KAITDAAMMAEELKK         | K | E | 95.00% | 98  | M8: Oxidation                | 833.4359  | 2 | 4.9  | 1769 | 1783 | Yes |
| KAITDAAMMAEELKK         | K | E | 95.00% | 81  | M8: Oxidation                | 555.9587  | 3 | 2.7  | 1769 | 1783 | Yes |
| KAITDAAMMAEELKK         | K | E | 95.00% | 35  | M8: Oxidation                | 417.2235  | 4 | 8.8  | 1769 | 1783 | Yes |
| KAITDAAMMAEELKK         | K | E | 95.00% | 75  | M8: Oxidation                | 841.4292  | 2 | -0.1 | 1769 | 1783 | Yes |
| KAITDAAMMAEELKK         | K | E | 95.00% | 64  | M8: Oxidation                | 561.2909  | 3 | 3.8  | 1769 | 1783 | Yes |
| KAITDAAMMAEELKK         | K | E | 95.00% | 75  | M8: Oxidation, M9: Oxidation | 841.4292  | 2 | -0.1 | 1769 | 1783 | Yes |
| KAITDAAMMAEELKK         | K | E | 95.00% | 64  | M9: Oxidation                | 561.2909  | 3 | 3.8  | 1769 | 1783 | Yes |
| KAITDAAMMAEELKK         | K | E | 95.00% | 103 | M9: Oxidation                | 833.4359  | 2 | 4.9  | 1769 | 1783 | Yes |
| KAITDAAMMAEELKK         | K | E | 95.00% | 63  | M9: Oxidation                | 555.9584  | 3 | 2.3  | 1769 | 1783 | Yes |
| KAITDAAMMAEELKK         | K | E | 95.00% | 37  | M9: Oxidation                | 417.2219  | 4 | 5.0  | 1769 | 1783 | Yes |
| KAITDAAMMAEELKK         | K | E | 95.00% | 104 |                              | 825.4369  | 2 | 3.0  | 1769 | 1783 | Yes |
| KAITDAAMMAEELKK         | K | E | 95.00% | 87  |                              | 550.6276  | 3 | 3.8  | 1769 | 1783 | Yes |
| KDIDDLELTLAK            | K | V | 95.00% | 109 |                              | 687.3849  | 2 | 6.4  | 960  | 971  | Yes |
| KDIDDLELTLAK            | K | V | 95.00% | 46  |                              | 458.5916  | 3 | 4.3  | 960  | 971  | Yes |

|                         |   |   |        |     |                |           |   |      |      |      |     |
|-------------------------|---|---|--------|-----|----------------|-----------|---|------|------|------|-----|
| KGSSFQTVSALFR           | K | E | 95.00% | 116 |                | 714.3909  | 2 | 6.5  | 648  | 660  | Yes |
| KGSSFQTVSALFR           | K | E | 95.00% | 57  |                | 476.5949  | 3 | 3.2  | 648  | 660  | Yes |
| KHADSVAEELGEQIDNLQR     | K | V | 95.00% | 127 |                | 1012.0220 | 2 | 7.1  | 1203 | 1220 | Yes |
| KHADSVAEELGEQIDNLQR     | K | V | 95.00% | 93  |                | 675.0148  | 3 | 3.8  | 1203 | 1220 | Yes |
| KHADSVAEELGEQIDNLQR     | K | V | 95.00% | 66  |                | 506.5128  | 4 | 3.4  | 1203 | 1220 | Yes |
| KKGSSFQTVSALFR          | K | E | 95.00% | 66  |                | 778.4344  | 2 | 0.8  | 647  | 660  | Yes |
| KKGSSFQTVSALFR          | K | E | 95.00% | 49  |                | 519.2949  | 3 | 6.0  | 647  | 660  | Yes |
| KKHADSVAEELGEQIDNLQR    | R | V | 95.00% | 89  |                | 717.7142  | 3 | 5.1  | 1202 | 1220 | Yes |
| KKHADSVAEELGEQIDNLQR    | R | V | 95.00% | 53  |                | 538.5365  | 4 | 3.1  | 1202 | 1220 | Yes |
| KLEGLK                  | R | L | 95.00% | 39  |                | 401.7396  | 2 | 4.6  | 1062 | 1068 | Yes |
| KRQEAPPHIFSISDNAYQFMLTD | R |   |        |     |                |           |   |      |      |      |     |
| KRQEAPPHIFSISDNAYQFMLTD | K | E | 95.00% | 89  | M20: Oxidation | 960.8171  | 3 | 8.9  | 147  | 170  | Yes |
| R                       | K | E | 95.00% | 82  |                | 955.4839  | 3 | 7.2  | 147  | 170  | Yes |
| LASADIETYLLEK           | K | S | 95.00% | 129 |                | 733.3926  | 2 | -1.2 | 259  | 271  | Yes |
| LASADIETYLLEK           | K | S | 95.00% | 66  |                | 489.2671  | 3 | 4.5  | 259  | 271  | Yes |
| LDEAEQLALK              | R | G | 95.00% | 51  |                | 1129.6220 | 1 | 9.6  | 1809 | 1818 | Yes |
| LDEAEQLALK              | R | G | 95.00% | 97  |                | 565.3107  | 2 | 2.5  | 1809 | 1818 | Yes |
| LDEAEQLALKGGK           | R | K | 95.00% | 66  |                | 686.3813  | 2 | 4.5  | 1809 | 1821 | Yes |
| LDEAEQLALKGGK           | R | K | 95.00% | 42  |                | 457.9226  | 3 | 2.6  | 1809 | 1821 | Yes |
| LDEAEQLALKGGKK          | R | Q | 95.00% | 81  |                | 750.4314  | 2 | 7.6  | 1809 | 1822 | Yes |
| LDEAEQLALKGGKK          | R | Q | 95.00% | 45  |                | 500.6212  | 3 | 2.9  | 1809 | 1822 | Yes |
| LODLVDK                 | R | L | 95.00% | 35  |                | 830.4684  | 1 | 7.0  | 1876 | 1882 | Yes |
| LODLVDK                 | R | L | 95.00% | 42  |                | 415.7369  | 2 | 4.1  | 1876 | 1882 | Yes |
| LQQFFNHHMFVLEQEEYK      | K | K | 95.00% | 49  | M9: Oxidation  | 795.0505  | 3 | 7.6  | 486  | 503  | Yes |
| LQQFFNHHMFVLEQEEYK      | K | K | 95.00% | 35  | M9: Oxidation  | 596.5412  | 4 | 9.8  | 486  | 503  | Yes |
| LQQFFNHHMFVLEQEEYK      | K | K | 95.00% | 43  |                | 789.7178  | 3 | 6.2  | 486  | 503  | Yes |
| LQQFFNHHMFVLEQEEYK      | K | K | 95.00% | 42  |                | 592.5402  | 4 | 6.1  | 486  | 503  | Yes |
| LQQFFNHHMFVLEQEEYK      | K | E | 95.00% | 68  | M9: Oxidation  | 1256.1180 | 2 | 5.7  | 486  | 504  | Yes |
| LQQFFNHHMFVLEQEEYK      | K | E | 95.00% | 51  | M9: Oxidation  | 837.7500  | 3 | 8.6  | 486  | 504  | Yes |
| LQQFFNHHMFVLEQEEYK      | K | E | 95.00% | 36  |                | 832.4160  | 3 | 5.8  | 486  | 504  | Yes |
| LQQFFNHHMFVLEQEEYK      | K | E | 95.00% | 42  |                | 499.8525  | 5 | 5.4  | 486  | 504  | Yes |
| LTGAVMHYGNMK            | K | F | 95.00% | 49  | M11: Oxidation | 669.3277  | 2 | 9.7  | 353  | 364  | Yes |
| LTGAVMHYGNMK            | K | F | 95.00% | 75  | M6: Oxidation  | 669.3235  | 2 | 3.5  | 353  | 364  | Yes |
| LTGAVMHYGNMK            | K | F | 95.00% | 60  | M6: Oxidation  | 677.3227  | 2 | 6.0  | 353  | 364  | Yes |
| LTGAVMHYGNMK            | K | F | 95.00% | 60  | M6: Oxidation, |           |   |      |      |      |     |
| LTGAVMHYGNMK            | K | F | 95.00% | 60  | M11: Oxidation | 677.3227  | 2 | 6.0  | 353  | 364  | Yes |
| LTGAVMHYGNMK            | K | F | 95.00% | 54  |                | 661.3290  | 2 | 7.9  | 353  | 364  | Yes |
| LYDQHLGK                | K | S | 95.00% | 53  |                | 487.2609  | 2 | 3.1  | 560  | 567  | Yes |
| MKGTLEDQIISANPLLEAFGNAK | K | T | 95.00% | 129 | M1: Oxidation  | 1238.6360 | 2 | -4.4 | 213  | 235  | No  |
| MKGTLEDQIISANPLLEAFGNAK | K | T | 95.00% | 107 | M1: Oxidation  | 826.0911  | 3 | -7.4 | 213  | 235  | No  |
| MKGTLEDQIISANPLLEAFGNAK | K | T | 95.00% | 96  |                | 1230.6560 | 2 | 9.0  | 213  | 235  | No  |
| NALAHALQSSR             | K | H | 95.00% | 91  |                | 584.3190  | 2 | 5.8  | 1339 | 1349 | Yes |
| NKDPLNETVVGLYQK         | K | S | 95.00% | 115 |                | 859.4667  | 2 | 7.5  | 605  | 619  | Yes |
| NKDPLNETVVGLYQK         | K | S | 95.00% | 75  |                | 573.3107  | 3 | 2.1  | 605  | 619  | Yes |
| QEAPPHIFSISDNAYQFMLTDR  | R | E | 95.00% | 90  | M18: Oxidation | 866.0825  | 3 | 6.9  | 149  | 170  | Yes |
| QEAPPHIFSISDNAYQFMLTDR  | R | E | 95.00% | 38  |                | 860.7493  | 3 | 5.1  | 149  | 170  | Yes |
| QKQREEQAEPDGEVADK       | K | T | 95.00% | 33  |                | 686.6686  | 3 | 7.7  | 367  | 384  | No  |
| QREEQAEPDGEVADK         | K | T | 95.00% | 104 |                | 901.4207  | 2 | 7.2  | 369  | 384  | No  |
| QREEQAEPDGEVADK         | K | T | 95.00% | 62  |                | 601.2809  | 3 | 3.6  | 369  | 384  | No  |
| RQEAPPHIFSISDNAYQFMLTDR | K | E | 95.00% | 106 | M19: Oxidation | 918.1165  | 3 | 6.7  | 148  | 170  | Yes |
| RQEAPPHIFSISDNAYQFMLTDR | K | E | 95.00% | 114 |                | 912.7863  | 3 | 8.4  | 148  | 170  | Yes |
| RQEAPPHIFSISDNAYQFMLTDR | K | E | 95.00% | 70  | M19: Oxidation | 1060.0320 | 4 | 9.5  | 148  | 185  | Yes |
| SAETEKEMATMK            | K | T | 95.00% | 38  | M11: Oxidation | 686.3137  | 2 | 4.3  | 850  | 861  | Yes |
| SAETEKEMATMK            | K | E | 95.00% | 34  | M11: Oxidation | 457.8794  | 3 | 6.5  | 850  | 861  | Yes |
| SAETEKEMATMK            | K | E | 95.00% | 37  | M8: Oxidation, |           |   |      |      |      |     |
| SAETEKEMATMK            | K | E | 95.00% | 36  | M11: Oxidation | 694.3143  | 2 | 8.8  | 850  | 861  | Yes |
| SAETEKEMATMK            | K | E | 95.00% | 36  |                | 678.3148  | 2 | 2.1  | 850  | 861  | Yes |
| SAETEKEMATMK            | K | E | 95.00% | 41  |                | 452.5479  | 3 | 6.8  | 850  | 861  | Yes |
| SAETEKEMATMKEEFQK       | K | T | 95.00% | 54  | M11: Oxidation | 1016.9680 | 2 | 4.0  | 850  | 866  | Yes |
| SAETEKEMATMKEEFQK       | K | T | 95.00% | 47  | M11: Oxidation | 678.3137  | 3 | 2.3  | 850  | 866  | Yes |
| SAETEKEMATMKEEFQK       | K | T | 95.00% | 67  | M8: Oxidation  | 1016.9690 | 2 | 4.2  | 850  | 866  | Yes |
| SAETEKEMATMKEEFQK       | K | T | 95.00% | 72  | M8: Oxidation  | 1024.9700 | 2 | 8.3  | 850  | 866  | Yes |
| SAETEKEMATMKEEFQK       | K | T | 95.00% | 49  | M8: Oxidation  | 683.6454  | 3 | 2.4  | 850  | 866  | Yes |

|     |             |       |                                                                  |                         |   |   |        |     |                                                                      |           |   |      |      |      |     |
|-----|-------------|-------|------------------------------------------------------------------|-------------------------|---|---|--------|-----|----------------------------------------------------------------------|-----------|---|------|------|------|-----|
|     |             |       |                                                                  | SAETEKEMATMKEEFQK       | K | T | 95.00% | 72  | M8: Oxidation,<br>M11: Oxidation<br>M8: Oxidation,<br>M11: Oxidation | 1024.9700 | 2 | 8.3  | 850  | 866  | Yes |
|     |             |       |                                                                  | SAETEKEMATMKEEFQK       | K | T | 95.00% | 49  |                                                                      | 683.6454  | 3 | 2.4  | 850  | 866  | Yes |
|     |             |       |                                                                  | SAETEKEMATMKEEFQK       | K | T | 95.00% | 92  |                                                                      | 1008.9730 | 2 | 6.5  | 850  | 866  | Yes |
|     |             |       |                                                                  | SAETEKEMATMKEEFQK       | K | T | 95.00% | 53  |                                                                      | 672.9824  | 3 | 2.8  | 850  | 866  | Yes |
|     |             |       |                                                                  | SLSTELFK                | R | L | 95.00% | 34  |                                                                      | 924.5075  | 1 | 3.4  | 1488 | 1495 | Yes |
|     |             |       |                                                                  | SLSTELFK                | R | L | 95.00% | 68  |                                                                      | 462.7583  | 2 | 4.8  | 1488 | 1495 | Yes |
|     |             |       |                                                                  | SSDTEMEVFGIAAPFLR       | M | K | 95.00% | 40  | M6: Oxidation                                                        | 943.4534  | 2 | -1.0 | 2    | 18   | No  |
|     |             |       |                                                                  | TEELEEK                 | R | K | 95.00% | 33  |                                                                      | 948.4558  | 1 | 3.3  | 1395 | 1402 | Yes |
|     |             |       |                                                                  | TEELEEK                 | R | K | 95.00% | 39  |                                                                      | 474.7330  | 2 | 5.9  | 1395 | 1402 | Yes |
|     |             |       |                                                                  | TEELEEKAK               | R | K | 95.00% | 40  |                                                                      | 538.7797  | 2 | 3.5  | 1395 | 1403 | Yes |
|     |             |       |                                                                  | TIHELEK                 | K | S | 95.00% | 31  |                                                                      | 435.2440  | 2 | 7.9  | 1534 | 1540 | No  |
|     |             |       |                                                                  | TKYETDAIQR              | R | T | 95.00% | 69  |                                                                      | 612.8171  | 2 | 3.2  | 1385 | 1394 | Yes |
|     |             |       |                                                                  | TKYETDAIQR              | R | T | 95.00% | 55  |                                                                      | 408.8806  | 3 | 3.1  | 1385 | 1394 | Yes |
|     |             |       |                                                                  | TKYETDAIQRTEELEEK       | R | K | 95.00% | 74  |                                                                      | 1077.5420 | 2 | 8.6  | 1385 | 1402 | Yes |
|     |             |       |                                                                  | TKYETDAIQRTEELEEK       | R | K | 95.00% | 38  |                                                                      | 718.6949  | 3 | 5.7  | 1385 | 1402 | Yes |
|     |             |       |                                                                  | TKYETDAIQRTEELEEK       | R | K | 95.00% | 31  |                                                                      | 539.2729  | 4 | 5.3  | 1385 | 1402 | Yes |
|     |             |       |                                                                  | VGNEYVTK                | K | G | 95.00% | 68  |                                                                      | 455.2394  | 2 | 3.0  | 407  | 414  | Yes |
|     |             |       |                                                                  | VKVGNEYVTK              | R | G | 95.00% | 59  |                                                                      | 568.8224  | 2 | 4.7  | 405  | 414  | Yes |
|     |             |       |                                                                  | VLNASAIPEGQFIDSK        | R | K | 95.00% | 115 |                                                                      | 844.9546  | 2 | 9.1  | 732  | 747  | No  |
|     |             |       |                                                                  | VLNASAIPEGQFIDSK        | R | K | 95.00% | 76  |                                                                      | 563.6365  | 3 | 4.6  | 732  | 747  | No  |
|     |             |       |                                                                  | VLNASAIPEGQFIDSKK       | R | A | 95.00% | 88  |                                                                      | 909.0018  | 2 | 8.1  | 732  | 748  | No  |
|     |             |       |                                                                  | VLNASAIPEGQFIDSKK       | R | A | 95.00% | 54  |                                                                      | 606.3343  | 3 | 3.4  | 732  | 748  | No  |
|     |             |       |                                                                  | YETDAIQR                | K | T | 95.00% | 34  |                                                                      | 498.2464  | 2 | 5.1  | 1387 | 1394 | Yes |
|     |             |       |                                                                  | ALDTLKGDEEAGAEAPPKEEVV  |   |   |        |     |                                                                      |           |   |      |      |      |     |
| 567 | IPI00794464 | CMYA1 | CARDIOMYOPATHY-ASSOCIATED PROTEIN 1.                             | PGDVR                   | R | S | 95.00% | 41  |                                                                      | 931.4759  | 3 | 5.9  | 353  | 379  | No  |
|     |             |       |                                                                  | AVPLAGEAAAQAQLQNTK      | K | Q | 95.00% | 51  |                                                                      | 939.9984  | 2 | -2.1 | 1001 | 1019 | No  |
|     |             |       |                                                                  | EQHLQVSVQVAGER          | R | Q | 95.00% | 62  |                                                                      | 789.4128  | 2 | 8.9  | 643  | 656  | No  |
|     |             |       |                                                                  | EQHLQVSVQVAGER          | R | Q | 95.00% | 38  |                                                                      | 526.6096  | 3 | 5.9  | 643  | 656  | No  |
|     |             |       |                                                                  | EQIVGGDVQGYR            | R | W | 95.00% | 44  |                                                                      | 660.8344  | 2 | 4.6  | 502  | 513  | No  |
|     |             |       |                                                                  | GISLEEGARPDVSATR        | R | W | 95.00% | 35  |                                                                      | 829.4315  | 2 | 2.4  | 293  | 308  | No  |
|     |             |       |                                                                  | KEELVSGELPR             | R | I | 95.00% | 70  |                                                                      | 628.8508  | 2 | 6.8  | 819  | 829  | No  |
|     |             |       |                                                                  | MATAEAQSLHQQVNLN        | R | H | 95.00% | 32  | M1: Oxidation                                                        | 595.6419  | 3 | 7.6  | 1060 | 1075 | No  |
|     |             |       |                                                                  | MQESOETAEGTLR           | R | T | 95.00% | 92  | M1: Oxidation                                                        | 783.8627  | 2 | 6.6  | 763  | 776  | No  |
|     |             |       |                                                                  | QGPTPTATSNPIQDGLR       | K | K | 95.00% | 53  |                                                                      | 876.9564  | 2 | 9.4  | 1078 | 1094 | No  |
|     |             |       |                                                                  | RPDQVQGLLVQEDPTGQLQLK   |   |   |        |     |                                                                      |           |   |      |      |      |     |
|     |             |       |                                                                  | PLR                     | R | L | 95.00% | 49  |                                                                      | 948.5266  | 3 | 9.2  | 837  | 861  | No  |
|     |             |       |                                                                  | RPDQVQGLLVQEDPTGQLQLK   |   |   |        |     |                                                                      |           |   |      |      |      |     |
|     |             |       |                                                                  | PLR                     | R | L | 95.00% | 47  |                                                                      | 711.6454  | 4 | 7.0  | 837  | 861  | No  |
|     |             |       |                                                                  | VEIPSGQVSR              | R | Q | 95.00% | 29  |                                                                      | 536.2977  | 2 | 7.1  | 686  | 695  | No  |
|     |             |       |                                                                  | VIAGSIPAGSVHK           | R | F | 95.00% | 50  |                                                                      | 618.3627  | 2 | 5.0  | 715  | 727  | No  |
|     |             |       |                                                                  | WLFETQPLEMIHQR          | R | E | 95.00% | 34  | M10: Oxidation                                                       | 615.3145  | 3 | 6.0  | 552  | 565  | No  |
|     |             |       |                                                                  | WLFETRPLDINQDPSQVR      | R | V | 95.00% | 53  |                                                                      | 762.4000  | 3 | 7.2  | 271  | 289  | No  |
| 568 | IPI00794849 | SLMAP | PROTEIN.                                                         | DEILLHQAAAK             | R | V | 95.00% | 100 |                                                                      | 661.3836  | 2 | 8.5  | 166  | 177  | Yes |
|     |             |       |                                                                  | ENVLLSSELQR             | R | Q | 95.00% | 64  |                                                                      | 644.3555  | 2 | 9.6  | 263  | 273  | No  |
|     |             |       |                                                                  |                         |   |   |        |     |                                                                      |           |   |      |      |      |     |
| 569 | IPI00797126 | NACA  | SIMILAR TO NASCENT POLYPEPTIDE ASSOCIATED COMPLEX ALPHA SUBUNIT. | EPSTQVATTLR             | K | I | 95.00% | 37  |                                                                      | 601.8275  | 2 | 7.4  | 492  | 502  | No  |
|     |             |       |                                                                  | IEDLSQQAQLAAAEEK        | K | F | 95.00% | 111 |                                                                      | 807.9264  | 2 | 6.7  | 838  | 852  | No  |
|     |             |       |                                                                  | IEDLSQQAQLAAAEEK        | K | F | 95.00% | 60  |                                                                      | 538.9542  | 3 | 7.9  | 838  | 852  | No  |
|     |             |       |                                                                  | IPVSPPLPDPEDLK          | R | N | 95.00% | 43  |                                                                      | 758.9239  | 2 | 8.8  | 503  | 516  | No  |
|     |             |       |                                                                  | KDPTVLPVQAAPK           | K | N | 95.00% | 31  |                                                                      | 738.9488  | 2 | 7.0  | 555  | 568  | No  |
|     |             |       |                                                                  | KDPTVLPVQAAPK           | K | N | 95.00% | 40  |                                                                      | 492.9696  | 3 | 9.3  | 555  | 568  | No  |
|     |             |       |                                                                  | NSPSFQSTSSSPEIPLSPEATLA |   |   |        |     |                                                                      |           |   |      |      |      |     |
|     |             |       |                                                                  | KK                      | K | S | 95.00% | 43  |                                                                      | 868.4534  | 3 | 9.3  | 569  | 593  | No  |
|     |             |       |                                                                  | SPASDTYIVFGEAK          | K | I | 95.00% | 96  |                                                                      | 742.8740  | 2 | 8.6  | 824  | 837  | No  |
|     |             |       |                                                                  | TISVDHSSTGASYPQR        | K | S | 95.00% | 92  |                                                                      | 896.9330  | 2 | 6.5  | 338  | 354  | No  |
|     |             |       |                                                                  | TISVDHSSTGASYPQR        | K | S | 95.00% | 43  |                                                                      | 598.2903  | 3 | 4.8  | 338  | 354  | No  |
|     |             |       |                                                                  | TNLNKVPSEVVPNPK         | K | G | 95.00% | 25  |                                                                      | 545.9791  | 3 | 8.8  | 186  | 200  | No  |
|     |             |       |                                                                  | VPSEVVPNPK              | K | G | 95.00% | 36  |                                                                      | 533.3040  | 2 | 5.3  | 191  | 200  | No  |
|     |             |       |                                                                  | AQASSIPVGSR             | K | C | 95.00% | 32  |                                                                      | 536.7944  | 2 | 5.6  | 154  | 164  | No  |
| 570 | IPI00798211 | TBCB  | 24 KDA PROTEIN.                                                  | YTISQEAVDQR             | K | Q | 95.00% | 71  |                                                                      | 687.3265  | 2 | 8.3  | 107  | 117  | No  |
| 571 | IPI00815770 | SNX3  | ISOFORM 1 OF SORTING NEXIN-3.                                    | KQGLEQFINK              | R | V | 95.00% | 28  |                                                                      | 602.8434  | 2 | 8.2  | 119  | 128  | No  |
|     |             |       |                                                                  | TNLPFIK                 | K | L | 95.00% | 44  |                                                                      | 416.7538  | 2 | 7.8  | 55   | 61   | No  |
|     |             |       |                                                                  |                         |   |   |        |     |                                                                      |           |   |      |      |      |     |
| 572 | IPI00000335 | HINT2 | HISTIDINE TRIAD NUCLEOTIDE-BINDING PROTEIN 2.                    | AQQATPGGAAPTIFSR        | K | I | 95.00% | 69  |                                                                      | 786.9176  | 2 | 8.8  | 43   | 58   | No  |
|     |             |       |                                                                  | DVAPQAPVHFLVIPK         | R | K | 95.00% | 29  |                                                                      | 815.9727  | 2 | 3.2  | 80   | 94   | No  |
|     |             |       |                                                                  | ISQAEEDDQQLLGHLLLVAK    | R | Q | 95.00% | 65  |                                                                      | 1117.6070 | 2 | 1.1  | 100  | 119  | No  |
|     |             |       |                                                                  | ISQAEEDDQQLLGHLLLVAK    | R | Q | 95.00% | 48  |                                                                      | 745.4102  | 3 | 5.2  | 100  | 119  | No  |
| 573 | IPI00000935 | PLN   | CARDIAC PHOSPHOLAMBAN.                                           | ASTIEMPPQAR             | R | Q | 95.00% | 55  | M6: Oxidation                                                        | 624.3107  | 2 | 6.5  | 15   | 25   | No  |

|     |                                                                                                        |                  |                                                                                                                                                                                                                                                                                                                                                                                                         |                        |   |   |        |     |                            |           |   |      |      |      |    |
|-----|--------------------------------------------------------------------------------------------------------|------------------|---------------------------------------------------------------------------------------------------------------------------------------------------------------------------------------------------------------------------------------------------------------------------------------------------------------------------------------------------------------------------------------------------------|------------------------|---|---|--------|-----|----------------------------|-----------|---|------|------|------|----|
|     |                                                                                                        |                  |                                                                                                                                                                                                                                                                                                                                                                                                         | ASTIEMPPQAR            | R | Q | 95.00% | 31  | T3: Phospho, M6: Oxidation | 664.2950  | 2 | 7.8  | 15   | 25   | No |
|     |                                                                                                        |                  |                                                                                                                                                                                                                                                                                                                                                                                                         | RASTIEMPPQAR           | R | Q | 95.00% | 47  | S3: Phospho, M7: Oxidation | 742.3473  | 2 | 9.3  | 14   | 25   | No |
| 574 | IPI00001580                                                                                            | FYCO1            | ISOFORM 1 OF FYVE AND COILED-COIL DOMAIN-CONTAINING PROTEIN 1.                                                                                                                                                                                                                                                                                                                                          | AQSLQEAAHQELNTLK       | R | F | 95.00% | 44  |                            | 890.9711  | 2 | 8.4  | 989  | 1004 | No |
|     |                                                                                                        |                  |                                                                                                                                                                                                                                                                                                                                                                                                         | LQAQVVDLQAK            | R | M | 95.00% | 31  |                            | 606.8572  | 2 | 9.3  | 788  | 798  | No |
| 575 | IPI00001952                                                                                            | ENDOD1           | ENDONUCLEASE DOMAIN-CONTAINING 1 PROTEIN PRECURSOR.                                                                                                                                                                                                                                                                                                                                                     | DRIPVYSAFR             | R | A | 95.00% | 33  |                            | 612.3365  | 2 | 9.4  | 73   | 82   | No |
|     |                                                                                                        |                  |                                                                                                                                                                                                                                                                                                                                                                                                         | ILEVNVQIQDEER          | K | M | 95.00% | 86  |                            | 792.9211  | 2 | 6.9  | 282  | 294  | No |
|     |                                                                                                        |                  |                                                                                                                                                                                                                                                                                                                                                                                                         | QALNTDYLDSDYQR         | K | G | 95.00% | 101 |                            | 851.3942  | 2 | 5.0  | 128  | 141  | No |
|     |                                                                                                        |                  |                                                                                                                                                                                                                                                                                                                                                                                                         | STLLPPEASEGSSSFLGK     | R | L | 95.00% | 72  |                            | 903.9689  | 2 | 9.6  | 313  | 330  | No |
| 576 | IPI00003091                                                                                            | PPP1R3A          | ISOFORM 1 OF PROTEIN PHOSPHATASE 1 REGULATORY SUBUNIT 3A.                                                                                                                                                                                                                                                                                                                                               | DLATLLSEHTAIPTR        | R | A | 95.00% | 30  |                            | 546.6390  | 3 | 9.1  | 561  | 575  | No |
|     |                                                                                                        |                  |                                                                                                                                                                                                                                                                                                                                                                                                         | LDLQLGMLPTDK           | K | T | 95.00% | 55  | M7: Oxidation              | 680.3675  | 2 | 5.6  | 862  | 873  | No |
|     |                                                                                                        |                  | GUANINE NUCLEOTIDE-BINDING PROTEIN G(I)/G(S)/G(T) SUBUNIT BETA 2.; GUANINE NUCLEOTIDE-BINDING PROTEIN SUBUNIT BETA 4.; GUANINE NUCLEOTIDE-BINDING PROTEIN G(I)/G(S)/G(T) SUBUNIT BETA 1.; GUANINE NUCLEOTIDE BINDING PROTEIN (G PROTEIN), BETA POLYPEPTIDE 1.; GUANINE NUCLEOTIDE BINDING PROTEIN (G PROTEIN), BETA POLYPEPTIDE 1.; GUANINE NUCLEOTIDE BINDING PROTEIN (G PROTEIN), BETA POLYPEPTIDE 1. |                        |   |   |        |     |                            |           |   |      |      |      |    |
| 577 | IPI00003348; IPI00012451; IPI00026268; IPI00639998; IPI00640462; IPI00640949                           | GNB1; GNB2; GNB4 |                                                                                                                                                                                                                                                                                                                                                                                                         | LIIWDSYTTNK            | K | V | 95.00% | 50  |                            | 677.3631  | 2 | 9.5  | 79   | 89   | No |
|     |                                                                                                        |                  |                                                                                                                                                                                                                                                                                                                                                                                                         | LLVSASQDGK             | R | L | 95.00% | 46  |                            | 509.2852  | 2 | 4.3  | 69   | 78   | No |
| 578 | IPI00003420                                                                                            | MAPRE2           | ISOFORM 1 OF MICROTUBULE-ASSOCIATED PROTEIN RP/EB FAMILY MEMBER 2.                                                                                                                                                                                                                                                                                                                                      | FYDANYDGKEYDPVEAR      | K | Q | 95.00% | 62  |                            | 684.6441  | 3 | 8.8  | 157  | 173  | No |
|     |                                                                                                        |                  |                                                                                                                                                                                                                                                                                                                                                                                                         | SDKDLETQVIQLNEQVHSLK   | K | L | 95.00% | 47  |                            | 775.4158  | 3 | 9.6  | 236  | 255  | No |
|     |                                                                                                        |                  | ISOFORM 1 OF PROTEIN 4.1.; ISOFORM 2 OF PROTEIN 4.1.; ISOFORM 3 OF PROTEIN 4.1.; ISOFORM 4 OF PROTEIN 4.1.; ISOFORM 5 OF PROTEIN 4.1.; ISOFORM 6 OF PROTEIN 4.1.; EPB41 PROTEIN (FRAGMENT).; HYPOTHETICAL PROTEIN (FRAGMENT).                                                                                                                                                                           |                        |   |   |        |     |                            |           |   |      |      |      |    |
| 579 | IPI00003921; IPI00218697; IPI00218698; IPI00218699; IPI00218700; IPI00218701; IPI00739613; IPI00791144 | EPB41            |                                                                                                                                                                                                                                                                                                                                                                                                         | IRPGEQEYESTIGFK        | K | L | 95.00% | 48  |                            | 627.9853  | 3 | 3.0  | 451  | 466  | No |
|     |                                                                                                        |                  |                                                                                                                                                                                                                                                                                                                                                                                                         | SLDGAAAVDSADR          | R | S | 95.00% | 43  |                            | 624.2922  | 2 | -8.2 | 542  | 554  | No |
|     |                                                                                                        |                  |                                                                                                                                                                                                                                                                                                                                                                                                         | SPRPTSAPAITQGQVAEGGVLD |   |   |        |     |                            |           |   |      |      |      |    |
|     |                                                                                                        |                  |                                                                                                                                                                                                                                                                                                                                                                                                         | ASAK                   | R | K | 95.00% | 80  |                            | 836.7759  | 3 | 2.4  | 555  | 580  | No |
| 580 | IPI00004457                                                                                            | AOC3             | MEMBRANE COPPER AMINE OXIDASE.                                                                                                                                                                                                                                                                                                                                                                          | EALAIVFFGR             | R | Q | 95.00% | 65  |                            | 561.8235  | 2 | 7.0  | 123  | 132  | No |
|     |                                                                                                        |                  |                                                                                                                                                                                                                                                                                                                                                                                                         | NLVTMTTAPR             | R | G | 95.00% | 35  | M5: Oxidation              | 560.2978  | 2 | 4.0  | 207  | 216  | No |
|     |                                                                                                        |                  |                                                                                                                                                                                                                                                                                                                                                                                                         | SPVPPGPAPPLQFYQGPGR    | K | F | 95.00% | 50  |                            | 1001.5400 | 2 | 8.2  | 304  | 322  | No |
| 581 | IPI00005202                                                                                            | PGRMC2           | MEMBRANE-ASSOCIATED PROGESTERONE RECEPTOR COMPONENT 2.                                                                                                                                                                                                                                                                                                                                                  | DFSLEQLR               | R | Q | 95.00% | 34  |                            | 504.2665  | 2 | 8.8  | 126  | 133  | No |
|     |                                                                                                        |                  |                                                                                                                                                                                                                                                                                                                                                                                                         | RGLGAGAGAGEESPATSLPR   | R | M | 95.00% | 31  |                            | 618.6600  | 3 | 9.2  | 102  | 121  | No |
| 582 | IPI00005537                                                                                            | MRPL12           | 39S RIBOSOMAL PROTEIN L12, MITOCHONDRIAL PRECURSOR.                                                                                                                                                                                                                                                                                                                                                     | KLVESLPQEIK            | K | A | 95.00% | 60  |                            | 642.3860  | 2 | 5.1  | 163  | 173  | No |
|     |                                                                                                        |                  |                                                                                                                                                                                                                                                                                                                                                                                                         | NYIQGINLVQAK           | K | K | 95.00% | 48  |                            | 680.8881  | 2 | 6.9  | 151  | 162  | No |
| 583 | IPI00005614                                                                                            | SPTBN1           | ISOFORM LONG OF SPECTRIN BETA CHAIN, BRAIN 1.                                                                                                                                                                                                                                                                                                                                                           | EVVAGSHELGQDYEHVTMLQER | R | F | 95.00% | 42  | M18: Oxidation             | 848.4055  | 3 | 6.8  | 1718 | 1739 | No |
|     |                                                                                                        |                  |                                                                                                                                                                                                                                                                                                                                                                                                         | LTTLELLEVR             | R | R | 95.00% | 41  |                            | 593.8621  | 2 | 9.6  | 2079 | 2088 | No |
| 584 | IPI00005755                                                                                            | TCAP             | TELETHONIN.                                                                                                                                                                                                                                                                                                                                                                                             | GLQEYQLPYQR            | R | V | 95.00% | 46  |                            | 697.8616  | 2 | 6.1  | 77   | 87   | No |
|     |                                                                                                        |                  |                                                                                                                                                                                                                                                                                                                                                                                                         | VLPLPIFTPAK            | R | M | 95.00% | 29  |                            | 598.3806  | 2 | 6.4  | 88   | 98   | No |
| 585 | IPI00005966                                                                                            | NDUFA12          | 13KDA DIFFERENTIATION-ASSOCIATED PROTEIN VARIANT (FRAGMENT).                                                                                                                                                                                                                                                                                                                                            | FNVTGTPEQYVPYSTTR      | K | K | 95.00% | 89  |                            | 980.4860  | 2 | 9.5  | 116  | 132  | No |
|     |                                                                                                        |                  |                                                                                                                                                                                                                                                                                                                                                                                                         | GLQQITGHGGLR           | R | G | 95.00% | 50  |                            | 618.8480  | 2 | 5.4  | 10   | 21   | No |
|     |                                                                                                        |                  |                                                                                                                                                                                                                                                                                                                                                                                                         | GLQQITGHGGLR           | R | G | 95.00% | 41  |                            | 412.8996  | 3 | 1.4  | 10   | 21   | No |
|     |                                                                                                        |                  |                                                                                                                                                                                                                                                                                                                                                                                                         | IQEWIPSTPYK            | K | - | 95.00% | 42  |                            | 729.8925  | 2 | 9.3  | 135  | 146  | No |
| 586 | IPI00006252; IPI00793201                                                                               | SCYE1            | MULTISYNTHETASE COMPLEX AUXILIARY COMPONENT P43.; 37 KDA PROTEIN.                                                                                                                                                                                                                                                                                                                                       | ITFDAFPGEPAKELNPK      | R | K | 95.00% | 61  |                            | 959.4912  | 2 | 7.5  | 251  | 267  | No |
|     |                                                                                                        |                  |                                                                                                                                                                                                                                                                                                                                                                                                         | KHPDADSLYVEEVDVGEIAPR  | R | T | 95.00% | 44  |                            | 585.5463  | 4 | 4.2  | 167  | 187  | No |







|     |                                                                              |               |                                                                                                                                                |                          |   |   |        |    |                |          |   |      |      |      |    |
|-----|------------------------------------------------------------------------------|---------------|------------------------------------------------------------------------------------------------------------------------------------------------|--------------------------|---|---|--------|----|----------------|----------|---|------|------|------|----|
| 611 | IPI00014310                                                                  | CUL1          | CULLIN-1.                                                                                                                                      | ESFESQLADTER             | K | F | 95.00% | 79 |                | 779.8610 | 2 | 7.4  | 230  | 242  | No |
|     |                                                                              |               |                                                                                                                                                | HLEIFHTEFQNLDDADKNEDLGR  | K | M | 95.00% | 35 |                | 689.3485 | 4 | 7.8  | 299  | 321  | No |
|     |                                                                              |               |                                                                                                                                                | HQQLLGEVLTQLSSR          | K | F | 95.00% | 44 |                | 570.3206 | 3 | 6.6  | 727  | 741  | No |
|     |                                                                              |               |                                                                                                                                                | LLETHIHNQGLAAIEK         | K | C | 95.00% | 37 |                | 596.3368 | 3 | 7.4  | 339  | 354  | No |
|     |                                                                              |               |                                                                                                                                                | LLVLEDENANVDEVELKPDTLIK  | K | L | 95.00% | 62 |                | 870.4778 | 3 | 9.6  | 648  | 670  | No |
|     |                                                                              |               |                                                                                                                                                | LVHQNSASDDAEASMISK       | R | L | 95.00% | 43 | M15: Oxidation | 640.3015 | 3 | 3.8  | 474  | 491  | No |
| 612 | IPI00014312; IPI00382458; IPI00382459                                        | CUL3          | ISOFORM 1 OF CULLIN-3.; ISOFORM 2 OF CULLIN-3.; ISOFORM 3 OF CULLIN-3.                                                                         | ALVSEEGEGKPNVDYIQGLLDLK  | K | S | 95.00% | 32 |                | 829.7768 | 3 | 6.6  | 327  | 349  | No |
|     |                                                                              |               |                                                                                                                                                | EDGSEVGVGGAQVTGSNTR      | K | K | 95.00% | 75 |                | 910.4290 | 2 | 4.3  | 570  | 588  | No |
|     |                                                                              |               |                                                                                                                                                | GLTEQEVETILDK            | K | A | 95.00% | 88 |                | 737.8904 | 2 | 5.8  | 378  | 390  | No |
|     |                                                                              |               |                                                                                                                                                | NNSGLSFEELYR             | K | N | 95.00% | 54 |                | 714.8441 | 2 | 3.2  | 48   | 59   | No |
|     |                                                                              |               |                                                                                                                                                | SPEYLSLFIDDK             | R | L | 95.00% | 56 |                | 713.8631 | 2 | 5.4  | 384  | 395  | No |
|     |                                                                              |               |                                                                                                                                                | YVNSIWDLLK               | K | N | 95.00% | 33 |                | 625.8473 | 2 | 6.5  | 5    | 14   | No |
|     |                                                                              |               | 234 KDA PROTEIN.; 232 KDA PROTEIN.; 227 KDA PROTEIN.; ISOFORM 1 OF MYOSIN-XVIII.A.; ISOFORM 3 OF MYOSIN-XVIII.A.; ISOFORM 4 OF MYOSIN-XVIII.A. | NTGESASQLLDAETAER        | R | L | 95.00% | 94 |                | 896.4300 | 2 | 8.9  | 1306 | 1322 | No |
| 613 | IPI00017030; IPI00402167; IPI00477329; IPI00760846; IPI00760925; IPI00828082 | MYO18A; TIAF1 |                                                                                                                                                | RFDSELSQAHEEAQR          | R | E | 95.00% | 31 |                | 601.6205 | 3 | 2.0  | 1465 | 1479 | No |
| 614 | IPI00017344                                                                  | RAB5B         | RAS-RELATED PROTEIN RAB-5B.                                                                                                                    | GAQAAIVVYDITNQETFAR      | R | A | 95.00% | 54 |                | 689.6938 | 3 | 7.2  | 92   | 110  | No |
|     |                                                                              |               |                                                                                                                                                | LVLGESAIVGK              | K | S | 95.00% | 50 |                | 543.3309 | 2 | -2.9 | 23   | 33   | No |
| 615 | IPI00017601                                                                  | CP            | CERULOPLASMIN PRECURSOR.                                                                                                                       | ALYLQYTDFTFR             | K | T | 95.00% | 53 |                | 760.3791 | 2 | 4.7  | 70   | 81   | No |
|     |                                                                              |               |                                                                                                                                                | GAYPLSIEPIGVR            | K | F | 95.00% | 47 |                | 686.3911 | 2 | 7.8  | 469  | 481  | No |
|     |                                                                              |               |                                                                                                                                                | KAEEEEHLGILGPQLHADVGDGK  | R | V | 95.00% | 33 |                | 752.7322 | 3 | 8.2  | 799  | 819  | No |
|     |                                                                              |               |                                                                                                                                                | KAEEEEHLGILGPQLHADVGDGVK | R | I | 95.00% | 27 |                | 621.5887 | 4 | 2.3  | 799  | 821  | No |
|     |                                                                              |               |                                                                                                                                                | MFTTAPDQVDEKEDDFQESNK    | R | M | 95.00% | 50 | M1: Oxidation  | 830.6985 | 3 | 7.3  | 599  | 619  | No |
|     |                                                                              |               |                                                                                                                                                | NNEGTYSPYNPQSR           | K | S | 95.00% | 76 |                | 952.4200 | 2 | 6.0  | 485  | 500  | No |
|     |                                                                              |               |                                                                                                                                                | PYTFHSHGITYYK            | R | E | 95.00% | 40 |                | 807.3965 | 2 | 6.1  | 116  | 128  | No |
|     |                                                                              |               |                                                                                                                                                | QSEDSTFYLGFR             | R | T | 95.00% | 40 |                | 716.3265 | 2 | 4.1  | 721  | 732  | No |
|     |                                                                              |               |                                                                                                                                                | TTIEKPVWLGLGPIIK         | R | A | 95.00% | 36 |                | 638.0540 | 3 | 7.8  | 82   | 98   | No |
|     |                                                                              |               |                                                                                                                                                | VNKDDEEFIESNK            | K | M | 95.00% | 70 |                | 783.8729 | 2 | 5.8  | 945  | 957  | No |
|     |                                                                              |               | CDNA FLJ25678 FIS. CLONE TST04067, HIGHLY SIMILAR TO PURINE NUCLEOSIDEPHOSPHORYLASE.                                                           | DHINLPGFSGQNPLR          | R | G | 95.00% | 32 |                | 555.6254 | 3 | 5.7  | 138  | 152  | No |
| 616 | IPI00017672                                                                  | NP            |                                                                                                                                                | LGADAVGMSTVPEVIVAR       | K | H | 95.00% | 60 | M8: Oxidation  | 900.9861 | 2 | 6.3  | 216  | 233  | No |
|     |                                                                              |               |                                                                                                                                                | VFGFSLITNK               | R | V | 95.00% | 76 |                | 563.3239 | 2 | 8.0  | 239  | 248  | No |
| 617 | IPI00018931                                                                  | VPS35         | VACUOLAR PROTEIN SORTING-ASSOCIATED PROTEIN 35.                                                                                                | AELAELPLR                | K | L | 95.00% | 41 |                | 506.2985 | 2 | 5.2  | 574  | 582  | No |
|     |                                                                              |               |                                                                                                                                                | ESPESEGPYIEGLIL          | R | - | 95.00% | 55 |                | 816.9123 | 2 | 9.6  | 782  | 796  | No |
|     |                                                                              |               |                                                                                                                                                | ILVGTNLVR                | R | L | 95.00% | 45 |                | 492.8166 | 2 | 4.8  | 218  | 226  | No |
|     |                                                                              |               |                                                                                                                                                | IPVDTYNNILTVLK           | K | L | 95.00% | 86 |                | 801.9656 | 2 | 7.8  | 404  | 417  | No |
|     |                                                                              |               |                                                                                                                                                | IREDLPNLESSEETEIQINK     | K | H | 95.00% | 57 |                | 748.7075 | 3 | 3.3  | 750  | 768  | No |
|     |                                                                              |               |                                                                                                                                                | LDFDIFSQQVATVIQSR        | K | Q | 95.00% | 77 |                | 926.5087 | 2 | 6.8  | 324  | 339  | No |
|     |                                                                              |               |                                                                                                                                                | LSQLEGVNVVER             | R | Y | 95.00% | 53 |                | 622.3395 | 2 | 5.2  | 227  | 237  | No |
|     |                                                                              |               |                                                                                                                                                | NIHIALIDR                | K | L | 95.00% | 46 |                | 520.8295 | 2 | 4.1  | 297  | 305  | No |
|     |                                                                              |               |                                                                                                                                                | SEDPDQQYLILNTAR          | R | K | 95.00% | 85 |                | 881.9377 | 2 | 3.5  | 500  | 514  | No |
| 618 | IPI00019345; IPI00640287                                                     | RAP1A         | RAS-RELATED PROTEIN RAP-1A PRECURSOR.; RAP1A, MEMBER OF RAS ONCOGENE FAMILY.                                                                   | LVVLGSGGVGK              | K | S | 95.00% | 40 |                | 493.3103 | 2 | 8.2  | 6    | 16   | No |
|     |                                                                              |               |                                                                                                                                                | VKDTEDVPMILVGNK          | R | C | 95.00% | 43 | M9: Oxidation  | 837.4479 | 2 | 5.7  | 103  | 117  | No |
| 619 | IPI00019580                                                                  | PLG           | PLASMINOGEN PRECURSOR.                                                                                                                         | EAQLPVIENK               | K | V | 95.00% | 30 |                | 570.8193 | 2 | 3.6  | 718  | 727  | No |
|     |                                                                              |               |                                                                                                                                                | HSIFTPETNPR              | R | A | 95.00% | 43 |                | 649.8320 | 2 | 5.3  | 513  | 523  | No |
|     |                                                                              |               |                                                                                                                                                | LSSPAVITDK               | K | V | 95.00% | 33 |                | 515.7954 | 2 | 4.3  | 671  | 680  | No |
| 620 | IPI00019591; IPI00639937                                                     | CFB           | ISOFORM 1 OF COMPLEMENT FACTOR B PRECURSOR (FRAGMENT).; B-FACTOR, PROPERDIN.                                                                   | VSEADSSNADVWTK           | K | Q | 95.00% | 72 |                | 754.8509 | 2 | 4.7  | 324  | 337  | No |
|     |                                                                              |               |                                                                                                                                                | YGLVTYATYPK              | R | I | 95.00% | 61 |                | 638.3394 | 2 | 6.6  | 309  | 319  | No |
| 621 | IPI00019906; IPI00218019; IPI00795150                                        | BSG           | ISOFORM 2 OF BASIGIN PRECURSOR.; ISOFORM 1 OF BASIGIN PRECURSOR.; 46 KDA PROTEIN.                                                              | GGVVLKEDALPGQK           | K | T | 95.00% | 66 |                | 705.9059 | 2 | 5.6  | 221  | 234  | No |
|     |                                                                              |               |                                                                                                                                                | RKPEDVLDDDDAGSAPLK       | R | S | 95.00% | 59 |                | 647.6616 | 3 | 6.2  | 233  | 250  | No |
| 622 | IPI00020416; IPI00640197                                                     | TPP2          | TRIPEPTIDYL-PEPTIDASE 2.; TRIPEPTIDYL PEPTIDASE II.                                                                                            | AYDYLVQNTSFANK           | K | L | 95.00% | 54 |                | 817.4042 | 2 | 8.8  | 507  | 520  | No |
|     |                                                                              |               |                                                                                                                                                | GTLTEAFPVLGGK            | K | A | 95.00% | 29 |                | 645.3638 | 2 | 6.9  | 716  | 728  | No |
|     |                                                                              |               |                                                                                                                                                | LSTMETGTGLIR             | R | A | 95.00% | 34 | M4: Oxidation  | 647.8422 | 2 | 6.7  | 301  | 312  | No |
|     |                                                                              |               |                                                                                                                                                | VPITAVIAAK               | R | V | 95.00% | 45 |                | 491.8203 | 2 | 2.7  | 629  | 638  | No |
| 623 | IPI00020898                                                                  | RPS6KA3       | RIBOSOMAL PROTEIN S6 KINASE ALPHA-3.                                                                                                           | DLKPENILLDEEGHIK         | R | L | 95.00% | 79 |                | 621.6705 | 3 | 4.8  | 193  | 208  | No |



|     |                                                                                                                                           |       |                                                                                                                                                                                                                                                                                                                                                                                                              |                                                                                                                                                                                        |                                                |                                                |                                                                                                  |                                                                         |                                                                                                                                              |                                                                                                           |                                           |                                                             |                                                             |                                                             |                                                      |
|-----|-------------------------------------------------------------------------------------------------------------------------------------------|-------|--------------------------------------------------------------------------------------------------------------------------------------------------------------------------------------------------------------------------------------------------------------------------------------------------------------------------------------------------------------------------------------------------------------|----------------------------------------------------------------------------------------------------------------------------------------------------------------------------------------|------------------------------------------------|------------------------------------------------|--------------------------------------------------------------------------------------------------|-------------------------------------------------------------------------|----------------------------------------------------------------------------------------------------------------------------------------------|-----------------------------------------------------------------------------------------------------------|-------------------------------------------|-------------------------------------------------------------|-------------------------------------------------------------|-------------------------------------------------------------|------------------------------------------------------|
| 628 | IPI00022391                                                                                                                               | APCS  | SERUM AMYLOID P-COMPONENT PRECURSOR.                                                                                                                                                                                                                                                                                                                                                                         | QGYFVEAQP<br>VGEYSLYIGR                                                                                                                                                                | R<br>R                                         | I<br>H                                         | 95.00%<br>95.00%                                                                                 | 35<br>51                                                                | 583.7995<br>578.8087                                                                                                                         | 2<br>2                                                                                                    | 5.5<br>8.0                                | 140<br>87                                                   | 149<br>96                                                   | No<br>No                                                    |                                                      |
|     |                                                                                                                                           |       | ISOFORM 1 OF FIBRONECTIN PRECURSOR.;<br>ISOFORM 3 OF FIBRONECTIN PRECURSOR.;<br>ISOFORM 5 OF FIBRONECTIN PRECURSOR.;<br>ISOFORM 6 OF FIBRONECTIN PRECURSOR.;<br>ISOFORM 7 OF FIBRONECTIN PRECURSOR.;<br>ISOFORM 8 OF FIBRONECTIN PRECURSOR.;<br>FIBRONECTIN 1 ISOFORM 4 PREPROTEIN.;<br>FIBRONECTIN 1 ISOFORM 2 PREPROTEIN.;<br>ISOFORM 10 OF FIBRONECTIN PRECURSOR.;<br>FIBRONECTIN 1 ISOFORM 6 PREPROTEIN. |                                                                                                                                                                                        |                                                |                                                |                                                                                                  |                                                                         |                                                                                                                                              |                                                                                                           |                                           |                                                             |                                                             |                                                             |                                                      |
| 629 | IPI00022418; IPI00339223; IPI00339225;<br>IPI00339226; IPI00339227; IPI00339228;<br>IPI00414283; IPI00470919; IPI00479723;<br>IPI00642991 | FN1   |                                                                                                                                                                                                                                                                                                                                                                                                              | FTNIGPDTMR<br>RPGGEPSPGTTGQSYNQYSQ<br>R                                                                                                                                                | R<br>R                                         | V<br>Y                                         | 95.00%<br>95.00%                                                                                 | 34<br>68                                                                | M9: Oxidation<br>584.2807                                                                                                                    | 2<br>3                                                                                                    | 5.6<br>4.6                                | 1275<br>2304                                                | 1284<br>2325                                                | No<br>No                                                    |                                                      |
|     |                                                                                                                                           |       |                                                                                                                                                                                                                                                                                                                                                                                                              | TEIDKPSQMQVTDVQDNSISVK                                                                                                                                                                 | R                                              | W                                              | 95.00%                                                                                           | 59                                                                      | M9: Oxidation                                                                                                                                | 826.7457                                                                                                  | 3                                         | 7.4                                                         | 1540                                                        | 1561                                                        | No                                                   |
| 630 | IPI00022429                                                                                                                               | ORM1  | ALPHA-1-ACID GLYCOPROTEIN 1 PRECURSOR.                                                                                                                                                                                                                                                                                                                                                                       | TYMLAFDVNDEK<br>WFIASAFR<br>YVGGQEHFAHLLLR<br>YVGGQEHFAHLLLR                                                                                                                           | K<br>K<br>R<br>R                               | N<br>N<br>D<br>D                               | 95.00%<br>95.00%<br>95.00%<br>95.00%                                                             | 50<br>54<br>105<br>62                                                   | M3: Oxidation                                                                                                                                | 731.3362<br>580.8023                                                                                      | 2<br>2                                    | 5.1<br>6.5                                                  | 127<br>43                                                   | 138<br>51                                                   | No<br>No                                             |
| 631 | IPI00022431                                                                                                                               | AHSG  | ALPHA-2-HS-GLYCOPROTEIN PRECURSOR.                                                                                                                                                                                                                                                                                                                                                                           | HTFMGVVSLGSPSGEVSHPR<br>HTFMGVVSLGSPSGEVSHPR<br>HTLNQIDEVK                                                                                                                             | R<br>R<br>K                                    | K<br>K<br>V                                    | 95.00%<br>95.00%<br>95.00%                                                                       | 74<br>35<br>42                                                          | M4: Oxidation<br>M4: Oxidation                                                                                                               | 699.6807<br>525.0121                                                                                      | 3<br>4                                    | 3.6<br>3.0                                                  | 318<br>318                                                  | 337<br>337                                                  | No<br>No                                             |
| 632 | IPI00022432                                                                                                                               | TTR   | TRANSTHYRETIN PRECURSOR.                                                                                                                                                                                                                                                                                                                                                                                     | AADDTWEPFASGK<br>GSPAINVAHVFR<br>GSPAINVAHVFR<br>KAADDTWEPFASGK<br>RYTIAALLSPYSYSTTAVVTNPK<br>E                                                                                        | K<br>R<br>R<br>R<br>R                          | T<br>K<br>K<br>T<br>-                          | 95.00%<br>95.00%<br>95.00%<br>95.00%<br>95.00%                                                   | 81<br>80<br>57<br>89<br>34                                              |                                                                                                                                              | 882.4748<br>571.3003                                                                                      | 3<br>2                                    | 10.0<br>2.9                                                 | 124<br>333                                                  | 147<br>343                                                  | No<br>No                                             |
| 633 | IPI00022488                                                                                                                               | HPX   | HEMOPEXIN PRECURSOR.                                                                                                                                                                                                                                                                                                                                                                                         | GGYTLVSGYPK<br>RLWWLDLK<br>SGAQATWTELPWPHEK<br>SGAQATWTELPWPHEK                                                                                                                        | K<br>R<br>K<br>K                               | -<br>S<br>V<br>V                               | 95.00%<br>95.00%<br>95.00%<br>95.00%                                                             | 56<br>39<br>43<br>42                                                    |                                                                                                                                              | 882.4748<br>571.3003                                                                                      | 3<br>2                                    | 10.0<br>2.9                                                 | 124<br>333                                                  | 147<br>343                                                  | No<br>No                                             |
| 634 | IPI00022977                                                                                                                               | CKB   | CREATINE KINASE B-TYPE.                                                                                                                                                                                                                                                                                                                                                                                      | DLFDPIEDR<br>DWPDPAR                                                                                                                                                                   | K<br>R                                         | H<br>G                                         | 95.00%<br>95.00%                                                                                 | 34<br>44                                                                |                                                                                                                                              | 616.8163<br>759.3495                                                                                      | 2<br>1                                    | 6.5<br>8.9                                                  | 42<br>87                                                    | 54<br>215                                                   | No<br>Yes                                            |
|     |                                                                                                                                           |       |                                                                                                                                                                                                                                                                                                                                                                                                              | GTGGVDTAAVGGVDFVSNADR<br>LAVEALSSLDGLAGR<br>LEQGQAIDDLMPAQK<br>LGFSEVELVQMVDGVK<br>LGFSEVELVQMVDGVK<br>LGFSEVELVQMVDGVK<br>PVSPLLLASGMAR<br>PVSPLLLASGMAR<br>SMTEAEQQQLIDHFLFDKPV<br>S | R<br>K<br>R<br>R<br>R<br>R<br>K<br>K<br>K<br>K | L<br>Y<br>-<br>L<br>L<br>L<br>D<br>D<br>D<br>D | 95.00%<br>95.00%<br>95.00%<br>95.00%<br>95.00%<br>95.00%<br>95.00%<br>95.00%<br>95.00%<br>95.00% | 121<br>104<br>86<br>106<br>51<br>97<br>77<br>88<br>74<br>79<br>37<br>46 | M11: Oxidation<br>M11: Oxidation<br>M11: Oxidation<br>M11: Oxidation<br>M11: Oxidation<br>M11: Oxidation<br>M2: Oxidation,<br>M30: Oxidation | 982.9782<br>793.9290<br>836.9199<br>932.9942<br>622.3338<br>924.9986<br>664.3789<br>656.3820<br>1207.2750 | 2<br>2<br>2<br>3<br>2<br>2<br>2<br>2<br>3 | 8.8<br>7.0<br>6.0<br>4.0<br>6.7<br>6.0<br>6.9<br>7.7<br>8.8 | 321<br>157<br>367<br>342<br>342<br>342<br>197<br>197<br>178 | 341<br>172<br>381<br>358<br>358<br>358<br>209<br>209<br>209 | No<br>No<br>No<br>No<br>No<br>No<br>Yes<br>Yes<br>No |
| 635 | IPI00024067; IPI00455383                                                                                                                  | CLTC  | ISOFORM 1 OF CLATHRIN HEAVY CHAIN 1.;<br>ISOFORM 2 OF CLATHRIN HEAVY CHAIN 1.                                                                                                                                                                                                                                                                                                                                | LASTLVHLGGEYQAAVD GAR<br>LLLPWLEAR<br>LLYNNVSNFGR<br>RPISADSAIMNPASK<br>VANVELYYR                                                                                                      | R<br>K<br>K<br>R<br>K                          | K<br>I<br>L<br>V<br>A                          | 95.00%<br>95.00%<br>95.00%<br>95.00%<br>95.00%                                                   | 38<br>30<br>34<br>55<br>51                                              | M10: Oxidation                                                                                                                               | 657.6877<br>555.8422                                                                                      | 3<br>2                                    | 8.8<br>8.0                                                  | 1227<br>857                                                 | 1245<br>865                                                 | No<br>No                                             |
| 636 | IPI00024107; IPI00218467; IPI00788661                                                                                                     | SNCA  | ISOFORM 1 OF ALPHA-SYNUCLEIN.; ISOFORM 2-4<br>OF ALPHA-SYNUCLEIN.; 12 KDA PROTEIN.                                                                                                                                                                                                                                                                                                                           | EGVVHGVATVAEK<br>TKEGVLYVGSK                                                                                                                                                           | K<br>K                                         | T<br>T                                         | 95.00%<br>95.00%                                                                                 | 43<br>35                                                                |                                                                                                                                              | 648.3549<br>590.8361                                                                                      | 2<br>2                                    | 4.6<br>5.4                                                  | 46<br>33                                                    | 58<br>43                                                    | No<br>No                                             |
|     |                                                                                                                                           |       |                                                                                                                                                                                                                                                                                                                                                                                                              | TKEQVTNVGGAVVTGTVAVAQK<br>TVEGAGSIAAATGFVKK                                                                                                                                            | K<br>K                                         | T<br>D                                         | 95.00%<br>95.00%                                                                                 | 44<br>41                                                                |                                                                                                                                              | 719.7411<br>803.9510                                                                                      | 3<br>2                                    | 9.2<br>8.6                                                  | 59<br>81                                                    | 80<br>97                                                    | No<br>No                                             |
| 637 | IPI00024266; IPI00639812                                                                                                                  | MGST3 | MICROSOMAL GLUTATHIONE S-TRANSFERASE<br>3.; MICROSOMAL GLUTATHIONE S-<br>TRANSFERASE 3.                                                                                                                                                                                                                                                                                                                      | IASGLGLAWIVGR<br>VLYAYGYTGEPSK<br>VLYAYGYTGEPSKR                                                                                                                                       | R<br>R<br>R                                    | V<br>R<br>S                                    | 95.00%<br>95.00%<br>95.00%                                                                       | 102<br>84<br>62                                                         |                                                                                                                                              | 656.8964<br>805.8970<br>883.9486                                                                          | 2<br>2<br>2                               | 8.1<br>7.4<br>7.9                                           | 85<br>98<br>98                                              | 97<br>111<br>112                                            | No<br>No<br>No                                       |

|                       |                                       |                       |                                                                          |                          |                                       |        |                                                                                                                          |              |                 |           |        |      |               |          |     |     |
|-----------------------|---------------------------------------|-----------------------|--------------------------------------------------------------------------|--------------------------|---------------------------------------|--------|--------------------------------------------------------------------------------------------------------------------------|--------------|-----------------|-----------|--------|------|---------------|----------|-----|-----|
| 638                   | IPI00024401                           | USP13                 | UBIQUITIN CARBOXYL-TERMINAL HYDROLASE 13.                                | GLQPGEELPDISPPIVDDSKD    | R                                     | L      | 95.00%                                                                                                                   | 37           |                 | 906.1336  | 3      | 6.0  | 618           | 642      | No  |     |
|                       |                                       |                       |                                                                          | R                        | F                                     | 95.00% | 36                                                                                                                       |              | 610.8040        | 2         | 7.4    | 464  | 474           | No       |     |     |
| 639                   | IPI00024976                           | TOMM22                | MITOCHONDRIAL IMPORT RECEPTOR SUBUNIT TOM22 HOMOLOG.                     | LQMEQQQLQQR              | K                                     | Q      | 95.00%                                                                                                                   | 63           | M3: Oxidation   | 787.3981  | 2      | 8.0  | 106           | 117      | No  |     |
|                       |                                       |                       |                                                                          | LWGLTEMFPER              | R                                     | V      | 95.00%                                                                                                                   | 32           | M7: Oxidation   | 697.8468  | 2      | 5.6  | 48            | 58       | No  |     |
| 640                   | IPI00025156                           | STUB1                 | ISOFORM 1 OF STIP1 HOMOLOG AND U BOX-CONTAINING PROTEIN 1.               | LNFGDDPSALR              | R                                     | I      | 95.00%                                                                                                                   | 32           |                 | 659.3497  | 2      | 8.4  | 129           | 140      | No  |     |
|                       |                                       |                       |                                                                          | NPLVAVYYTNR              | R                                     | A      | 95.00%                                                                                                                   | 62           |                 | 655.3545  | 2      | 8.4  | 56            | 66       | No  |     |
|                       |                                       |                       |                                                                          | SPLTQEQLIPNLAMK          | R                                     | E      | 95.00%                                                                                                                   | 51           | M14: Oxidation  | 849.9630  | 2      | 4.6  | 273           | 287      | No  |     |
| 641                   | IPI00025341                           | BDH1                  | D-BETA-HYDROXYBUTYRATE DEHYDROGENASE, MITOCHONDRIAL PRECURSOR.           | SFLPLIR                  | K                                     | R      | 95.00%                                                                                                                   | 27           |                 | 423.2694  | 2      | 7.1  | 178           | 184      | No  |     |
|                       |                                       |                       |                                                                          | VVNISSMLGR               | R                                     | M      | 95.00%                                                                                                                   | 37           | M7: Oxidation   | 546.2962  | 2      | -3.4 | 190           | 199      | No  |     |
| 642                   | IPI00025717; IPI00477773              | MTX2                  | METAXIN-2.; METAXIN 2 ISOFORM B.                                         | GHSLSDCGLEEVQK           | K                                     | A      | 95.00%                                                                                                                   | 66           |                 | 699.8503  | 2      | 4.5  | 86            | 98       | No  |     |
|                       |                                       |                       |                                                                          | LGTQPYFFNK               | R                                     | Q      | 95.00%                                                                                                                   | 31           |                 | 607.8201  | 2      | 9.2  | 187           | 196      | No  |     |
| 643                   | IPI00026260; IPI00604590; IPI00795292 | NME1; NME1-NME2; NME2 | NUCLEOSIDE DIPHOSPHATE KINASE B.; NME1-NME2 PROTEIN.; NME1-NME2 PROTEIN. | DRPFFPGLVK               | K                                     | Y      | 95.00%                                                                                                                   | 29           |                 | 588.3357  | 2      | 4.9  | 57            | 66       | No  |     |
|                       |                                       |                       |                                                                          | GLVGEIIR                 | R                                     | F      | 95.00%                                                                                                                   | 60           |                 | 492.8172  | 2      | 6.0  | 19            | 27       | Yes |     |
|                       |                                       |                       |                                                                          | TFIAIKPDGVQR             | R                                     | G      | 95.00%                                                                                                                   | 68           |                 | 672.8903  | 2      | 6.4  | 7             | 18       | No  |     |
|                       |                                       |                       |                                                                          | VMLGETNPADSKPGTIR        | R                                     | G      | 95.00%                                                                                                                   | 54           | M2: Oxidation   | 901.4668  | 2      | 7.6  | 89            | 105      | Yes |     |
|                       |                                       |                       |                                                                          | VMLGETNPADSKPGTIR        | R                                     | G      | 95.00%                                                                                                                   | 48           | M2: Oxidation   | 601.3131  | 3      | 6.4  | 89            | 105      | No  |     |
| 644                   | IPI00027223                           | IDH1                  | ISOCITRATE DEHYDROGENASE [NADP] CYTOPLASMIC.                             | FKDIFQEIYDK              | R                                     | Q      | 95.00%                                                                                                                   | 57           |                 | 723.3737  | 2      | 5.2  | 223           | 233      | No  |     |
|                       |                                       |                       |                                                                          | GOETSTNPIASIFAWTR        | K                                     | G      | 95.00%                                                                                                                   | 79           |                 | 939.9764  | 2      | 5.3  | 322           | 338      | No  |     |
|                       |                                       |                       |                                                                          | ISGGSVVMQGDDEMTR         | K                                     | I      | 95.00%                                                                                                                   | 74           | M9: Oxidation,  | 864.3869  | 2      | 4.6  | 5             | 20       | No  |     |
|                       |                                       |                       |                                                                          | LIFPYVELDLHSYDLGIENR     | K                                     | D      | 95.00%                                                                                                                   | 56           | M14: Oxidation  | 802.7568  | 3      | 8.4  | 30            | 49       | No  |     |
|                       |                                       |                       |                                                                          | LVSGVVKPIIIGR            | R                                     | H      | 95.00%                                                                                                                   | 50           |                 | 479.9723  | 3      | 4.4  | 120           | 132      | No  |     |
|                       |                                       |                       |                                                                          | NILGGTVFR                | R                                     | E      | 95.00%                                                                                                                   | 57           |                 | 488.7877  | 2      | 9.7  | 101           | 109      | Yes |     |
|                       |                                       |                       |                                                                          | VEITYTPSDGTQK            | K                                     | V      | 95.00%                                                                                                                   | 67           |                 | 719.8637  | 2      | 8.9  | 152           | 164      | No  |     |
|                       |                                       |                       |                                                                          | VTYLVHNFEEGGGVAMGMYNQ    |                                       |        |                                                                                                                          |              |                 |           |        |      |               |          |     |     |
|                       |                                       |                       |                                                                          | DK                       | K                                     | S      | 95.00%                                                                                                                   | 64           | M16: Oxidation, | 864.3957  | 3      | 6.4  | 165           | 187      | No  |     |
|                       |                                       |                       |                                                                          |                          |                                       |        |                                                                                                                          |              |                 |           |        |      |               |          |     |     |
|                       |                                       |                       |                                                                          | 645                      | IPI00027342; IPI00552929; IPI00792495 | CAP2   | ADENYL CYCLASE-ASSOCIATED PROTEIN 2.; HYPOTHETICAL PROTEIN DKFZP686D0714.; CAP, ADENYLATE CYCLASE-ASSOCIATED PROTEIN, 2. | EMNDAATFYTNR | K               | V         | 95.00% | 29   | M2: Oxidation | 724.8145 | 2   | 6.7 |
| ILAGDVETHAEMVHSAFQAQR | R                                     | A                     | 95.00%                                                                   |                          |                                       |        |                                                                                                                          | 52           | M12: Oxidation  | 776.0517  | 3      | 6.3  | 63            | 83       | No  |     |
| IQEIQTFR              | K                                     | E                     | 95.00%                                                                   |                          |                                       |        |                                                                                                                          | 36           |                 | 517.7882  | 2      | 4.7  | 114           | 121      | No  |     |
| SALFAQLNQGEAITK       | R                                     | G                     | 95.00%                                                                   |                          |                                       |        |                                                                                                                          | 88           |                 | 795.9328  | 2      | 5.3  | 258           | 272      | No  |     |
| LMEDLDR               | R                                     | N                     | 95.00%                                                                   |                          |                                       |        |                                                                                                                          | 30           | M2: Oxidation   | 454.2160  | 2      | 5.0  | 56            | 62       | No  |     |
| 646                   | IPI00027463                           | S100A6                | PROTEIN S100-A6.                                                         | LQDAEIR                  | K                                     | L      | 95.00%                                                                                                                   | 49           |                 | 458.2500  | 2      | 2.4  | 48            | 55       | No  |     |
|                       |                                       |                       |                                                                          | ALQFLEEVK                | K                                     | V      | 95.00%                                                                                                                   | 48           |                 | 538.8054  | 2      | 3.3  | 130           | 138      | No  |     |
| 647                   | IPI00027626                           | CCT6A                 | T-COMPLEX PROTEIN 1 SUBUNIT ZETA.                                        | AQLGVQAFADALLIIPK        | R                                     | V      | 95.00%                                                                                                                   | 87           |                 | 884.5286  | 2      | 6.6  | 433           | 449      | No  |     |
|                       |                                       |                       |                                                                          | DGNVLLHEMQIHPHTASLIAK    | K                                     | V      | 95.00%                                                                                                                   | 38           | M9: Oxidation   | 777.7476  | 3      | 6.0  | 59            | 79       | No  |     |
|                       |                                       |                       |                                                                          | GIDPFLDALSK              | K                                     | E      | 95.00%                                                                                                                   | 73           |                 | 631.8395  | 2      | 6.1  | 296           | 307      | No  |     |
|                       |                                       |                       |                                                                          | TEVNSGFFYK               | K                                     | S      | 95.00%                                                                                                                   | 38           |                 | 596.2905  | 2      | 3.9  | 242           | 251      | No  |     |
|                       |                                       |                       |                                                                          | VATAQDDITGDGTTSNVLIIGELL |                                       |        |                                                                                                                          |              |                 |           |        |      |               |          |     |     |
|                       |                                       |                       |                                                                          | K                        | K                                     | Q      | 95.00%                                                                                                                   | 70           |                 | 848.7925  | 3      | 8.3  | 80            | 104      | No  |     |
|                       |                                       |                       |                                                                          | VHAELADVLTEAVVDSILAIAK   | K                                     | K      | 95.00%                                                                                                                   | 156          |                 | 1103.6320 | 2      | 10.0 | 160           | 180      | No  |     |
|                       |                                       |                       |                                                                          | VHAELADVLTEAVVDSILAIAK   | K                                     | K      | 95.00%                                                                                                                   | 55           |                 | 736.0867  | 3      | 5.1  | 160           | 180      | No  |     |
|                       |                                       |                       |                                                                          | VLAQNSGFDLQETLVK         | K                                     | I      | 95.00%                                                                                                                   | 112          |                 | 881.4807  | 2      | 8.4  | 450           | 465      | No  |     |
|                       |                                       |                       |                                                                          |                          |                                       |        |                                                                                                                          |              |                 |           |        |      |               |          |     |     |
| 648                   | IPI00027701                           | ACADS                 | SHORT-CHAIN SPECIFIC ACYL-COA DEHYDROGENASE, MITOCHONDRIAL PRECURSOR.    | DSILGEPGMGFK             | K                                     | I      | 95.00%                                                                                                                   | 38           | M9: Oxidation   | 633.8084  | 2      | 3.8  | 251           | 262      | No  |     |
|                       |                                       |                       |                                                                          | ELFPAAQVDKEHLFPAAQVK     | K                                     | K      | 95.00%                                                                                                                   | 44           |                 | 784.4336  | 3      | 3.7  | 52            | 72       | No  |     |
|                       |                                       |                       |                                                                          | GISAFVPMPTPLGLTK         | K                                     | K      | 95.00%                                                                                                                   | 42           |                 | 908.0153  | 2      | 7.3  | 209           | 226      | No  |     |
|                       |                                       |                       |                                                                          | IAMQTLDMGR               | K                                     | I      | 95.00%                                                                                                                   | 70           | M9: Oxidation   | 584.2797  | 2      | 1.0  | 263           | 272      | No  |     |
|                       |                                       |                       |                                                                          | IAMQTLDMGR               | K                                     | I      | 95.00%                                                                                                                   | 43           | M8: Oxidation   | 576.2825  | 2      | 1.5  | 263           | 272      | No  |     |
|                       |                                       |                       |                                                                          | ITEIYEGTSEIQR            | R                                     | L      | 95.00%                                                                                                                   | 102          |                 | 769.8917  | 2      | 3.4  | 387           | 399      | No  |     |
|                       |                                       |                       |                                                                          | ITEIYEGTSEIQR            | R                                     | L      | 95.00%                                                                                                                   | 32           |                 | 513.5945  | 3      | -1.5 | 387           | 399      | No  |     |
|                       |                                       |                       |                                                                          | LAASEAATAISHQAIQILGGMGY  |                                       |        |                                                                                                                          |              |                 |           |        |      |               |          |     |     |
|                       |                                       |                       |                                                                          | VTEMPAER                 | K                                     | H      | 95.00%                                                                                                                   | 78           | M21: Oxidation, | 805.4082  | 4      | 8.4  | 350           | 380      | No  |     |
|                       |                                       |                       |                                                                          | LADMALALESAR             | K                                     | L      | 95.00%                                                                                                                   | 68           | M27: Oxidation  | 638.8361  | 2      | 5.7  | 314           | 325      | No  |     |
|                       |                                       |                       |                                                                          | LQVIQFK                  | K                                     | L      | 95.00%                                                                                                                   | 36           | M4: Oxidation   | 438.2730  | 2      | 3.1  | 307           | 313      | No  |     |
|                       |                                       |                       |                                                                          | LVIAGHLLR                | R                                     | S      | 95.00%                                                                                                                   | 66           |                 | 496.3265  | 2      | 3.4  | 400           | 408      | No  |     |
|                       |                                       |                       |                                                                          | MAFGAPLTK                | R                                     | L      | 95.00%                                                                                                                   | 39           | M1: Oxidation   | 476.2541  | 2      | 3.1  | 298           | 306      | No  |     |



|     |                                       |             |                                                                                                                                 |                                                                                                                                                                                                                                                          |                                                               |                                                               |                                                                                                                                |                                                                             |                                                  |                                                                                                                                                            |                                                               |                                                                                          |                                                                                        |                                                                                 |                                                                             |
|-----|---------------------------------------|-------------|---------------------------------------------------------------------------------------------------------------------------------|----------------------------------------------------------------------------------------------------------------------------------------------------------------------------------------------------------------------------------------------------------|---------------------------------------------------------------|---------------------------------------------------------------|--------------------------------------------------------------------------------------------------------------------------------|-----------------------------------------------------------------------------|--------------------------------------------------|------------------------------------------------------------------------------------------------------------------------------------------------------------|---------------------------------------------------------------|------------------------------------------------------------------------------------------|----------------------------------------------------------------------------------------|---------------------------------------------------------------------------------|-----------------------------------------------------------------------------|
| 660 | IPI00042580; IPI00647123; IPI00797546 | APOO        | ISOFORM 1 OF APOLIPOPROTEIN O PRECURSOR.; 13 KDA PROTEIN.; ISOFORM 2 OF APOLIPOPROTEIN O PRECURSOR.                             | SOLEESISQLR<br>VDELSLYSVPEGQSK                                                                                                                                                                                                                           | R<br>K                                                        | H<br>Y                                                        | 95.00%<br>95.00%                                                                                                               | 63<br>50                                                                    |                                                  | 645.3428<br>825.9233                                                                                                                                       | 2<br>2                                                        | 6.0<br>9.8                                                                               | 58<br>37                                                                               | 68<br>51                                                                        | No<br>No                                                                    |
| 661 | IPI00045496                           | USP28       | ISOFORM 1 OF UBIQUITIN CARBOXYL-TERMINAL HYDROLASE 28.                                                                          | ARQTFDRDGSEAGLIK<br>SISIMK                                                                                                                                                                                                                               | K<br>R                                                        | A<br>V                                                        | 95.00%<br>95.00%                                                                                                               | 38<br>26                                                                    | M5: Oxidation                                    | 882.4524<br>694.3846                                                                                                                                       | 2<br>1                                                        | -4.2<br>5.2                                                                              | 785<br>861                                                                             | 800<br>866                                                                      | No<br>No                                                                    |
| 662 | IPI00065495; IPI00152070; IPI00736624 | COQ10A      | ISOFORM 1 OF PROTEIN COQ10 A, MITOCHONDRIAL PRECURSOR.; COQ10A PROTEIN.; ISOFORM 2 OF PROTEIN COQ10 A, MITOCHONDRIAL PRECURSOR. | FGPETAIPR<br>LFNHLETIWR                                                                                                                                                                                                                                  | K<br>K                                                        | E<br>F                                                        | 95.00%<br>95.00%                                                                                                               | 33<br>51                                                                    |                                                  | 494.2691<br>443.5795                                                                                                                                       | 2<br>3                                                        | 3.8<br>8.5                                                                               | 229<br>166                                                                             | 237<br>175                                                                      | No<br>No                                                                    |
| 663 | IPI00105916                           | NOL3        | ISOFORM 1 OF NUCLEOLAR PROTEIN 3.                                                                                               | LLLLVQGK<br>LVETLQADSGLLLDALLAR                                                                                                                                                                                                                          | R<br>R                                                        | G<br>G                                                        | 95.00%<br>95.00%                                                                                                               | 49<br>51                                                                    |                                                  | 442.3061<br>671.0589                                                                                                                                       | 2<br>3                                                        | 7.0<br>8.4                                                                               | 61<br>19                                                                               | 68<br>37                                                                        | No<br>No                                                                    |
| 664 | IPI00152692; IPI00829870              | DTD1; HARS2 | PROBABLE D-TYROSYL-TRNA(TYR) DEACYLASE 1.; HISTIDYL-TRNA SYNTHETASE 2.                                                          | ASVTVGGEQISAIGR<br>SASSGAEGDVSSEREP                                                                                                                                                                                                                      | R<br>R                                                        | G<br>-                                                        | 95.00%<br>95.00%                                                                                                               | 52<br>71                                                                    |                                                  | 722.8981<br>782.8470                                                                                                                                       | 2<br>2                                                        | 8.5<br>8.7                                                                               | 11<br>194                                                                              | 25<br>209                                                                       | No<br>No                                                                    |
| 665 | IPI00157790                           | KIAA0368    | KIAA0368 PROTEIN.                                                                                                               | HSVATAADLELK<br>LGHAETDEQLQNIISK<br>YLLLLAAGDPR                                                                                                                                                                                                          | R<br>R<br>R                                                   | S<br>F<br>E                                                   | 95.00%<br>95.00%<br>95.00%                                                                                                     | 30<br>35<br>38                                                              |                                                  | 627.8422<br>599.3132<br>601.3557                                                                                                                           | 2<br>3<br>2                                                   | 5.7<br>2.7<br>7.4                                                                        | 446<br>195<br>689                                                                      | 457<br>210<br>699                                                               | No<br>No<br>No                                                              |
| 666 | IPI00168620                           | ADPRHL1     | ISOFORM 1 OF [PROTEIN ADP-RIBOSYLARGININE] HYDROLASE-LIKE PROTEIN 1.                                                            | AAMLLGSGVDALGYR<br>AAMLLGSGVDALGYR<br>AIFPDNYDAEER<br>AIFPDNYDAEEREK<br>GLYQDLEDKEK<br>GLYQDLEDKEKLEDLGAALYR<br>LEDLGAALYR<br>WQFYLEER                                                                                                                   | K<br>K<br>K<br>K<br>K<br>K<br>K<br>K                          | N<br>N<br>E<br>T<br>L<br>L<br>K<br>K                          | 95.00%<br>95.00%<br>95.00%<br>95.00%<br>95.00%<br>95.00%<br>95.00%<br>95.00%                                                   | 78<br>35<br>38<br>71<br>30<br>63<br>84<br>40                                | M3: Oxidation<br>M3: Oxidation                   | 755.3950<br>503.9328<br>720.3291<br>848.8993<br>669.3377<br>813.7575<br>560.8067<br>585.7852                                                               | 2<br>3<br>2<br>2<br>3<br>3<br>2<br>2                          | 5.7<br>6.1<br>4.2<br>5.3<br>6.3<br>6.5<br>4.6<br>3.4                                     | 6<br>6<br>245<br>245<br>328<br>328<br>339<br>228                                       | 20<br>20<br>256<br>258<br>338<br>348<br>348<br>235                              | No<br>No<br>No<br>No<br>No<br>No<br>No<br>No                                |
| 667 | IPI00171844                           | COPS4       | COP9 SIGNALOSOME COMPLEX SUBUNIT 4.                                                                                             | AIQLSGAEQLEALK<br>ASLLQNESTNEQLQIHYK<br>ATTADGSSILDR<br>AVIEHNLLSASK<br>LYLEDDDPVQAEAYINR<br>LYLEDDDPVQAEAYINR<br>LYNNITFEELGALLEIPAACK<br>LYNNITFEELGALLEIPAACK<br>MNGFIDQIDGIVHFETR<br>NAAQVLVGIPLGTGQK<br>VISFEEQVASIR<br>AEVAESQVNVK<br>LTGAIMHFGNMK | K<br>R<br>K<br>R<br>R<br>R<br>K<br>K<br>R<br>R<br>R<br>R<br>K | A<br>V<br>A<br>L<br>A<br>A<br>A<br>E<br>Q<br>Q<br>Q<br>L<br>F | 95.00%<br>95.00%<br>95.00%<br>95.00%<br>95.00%<br>95.00%<br>95.00%<br>95.00%<br>95.00%<br>95.00%<br>95.00%<br>95.00%<br>95.00% | 98<br>41<br>43<br>75<br>94<br>53<br>108<br>89<br>63<br>84<br>80<br>43<br>62 | M1: Oxidation<br>M1: Oxidation                   | 735.9176<br>706.0298<br>603.8076<br>641.3619<br>1012.4900<br>675.3305<br>1110.1120<br>740.4106<br>669.9955<br>819.4721<br>689.3776<br>537.7797<br>668.3378 | 2<br>3<br>2<br>2<br>2<br>3<br>2<br>3<br>3<br>2<br>2<br>2<br>2 | 7.1<br>3.0<br>8.7<br>-0.5<br>5.2<br>7.2<br>8.6<br>8.9<br>5.4<br>8.3<br>6.9<br>7.8<br>9.1 | 33<br>171<br>302<br>314<br>154<br>154<br>315<br>315<br>348<br>122<br>96<br>1922<br>364 | 46<br>188<br>No<br>No<br>No<br>No<br>No<br>No<br>364<br>137<br>107<br>No<br>375 | No<br>No<br>No<br>No<br>No<br>No<br>No<br>No<br>No<br>No<br>No<br>No<br>Yes |
| 668 | IPI00180408                           | MYH15       | MYOSIN-15.                                                                                                                      | LTGAIMHFGNMK<br>LTGAIMHFGNMK<br>NLTEMEK                                                                                                                                                                                                                  | K<br>K<br>K                                                   | F<br>F<br>V                                                   | 95.00%<br>95.00%<br>95.00%                                                                                                     | 67<br>83<br>32                                                              | M11: Oxidation<br>M11: Oxidation                 | 676.3319<br>660.3402<br>880.4110                                                                                                                           | 2<br>2<br>1                                                   | 4.2<br>9.1<br>2.6                                                                        | 364<br>364<br>1534                                                                     | 375<br>375<br>1540                                                              | Yes<br>Yes<br>No                                                            |
| 669 | IPI00215719                           | RPL18       | 60S RIBOSOMAL PROTEIN L18.                                                                                                      | ILTFDQLALDSPK<br>TAVVVGITITDDVR                                                                                                                                                                                                                          | K<br>K                                                        | G<br>V                                                        | 95.00%<br>95.00%                                                                                                               | 88<br>44                                                                    | M5: Oxidation                                    | 730.9065<br>673.3737                                                                                                                                       | 2<br>2                                                        | 3.3<br>5.1                                                                               | 120<br>79                                                                              | 132<br>91                                                                       | No<br>No                                                                    |
| 670 | IPI00215894; IPI00789376; IPI00797833 | KNG1        | ISOFORM LMW OF KININOGEN-1 PRECURSOR.; KNG1 PROTEIN.; KININOGEN 1.                                                              | IGEIKEETTSHLR<br>IGEIKEETTSHLR<br>YFIDFVAR                                                                                                                                                                                                               | R<br>R<br>K                                                   | S<br>S<br>E                                                   | 95.00%<br>95.00%<br>95.00%                                                                                                     | 33<br>57<br>29                                                              |                                                  | 756.9071<br>504.9411<br>515.7751                                                                                                                           | 2<br>3<br>2                                                   | 2.6<br>3.4<br>6.0                                                                        | 393<br>393<br>317                                                                      | 405<br>405<br>324                                                               | No<br>No<br>No                                                              |
| 671 | IPI00215979                           | BPGM        | BISPHOSPHOGLYCERATE MUTASE.                                                                                                     | AVGPHQFLGDQEAIAQAIK<br>EQMALNHGEEQVR<br>HYGALIGLNR<br>SESLKDVLER                                                                                                                                                                                         | R<br>R<br>R<br>R                                              | K<br>L<br>E<br>L                                              | 95.00%<br>95.00%<br>95.00%<br>95.00%                                                                                           | 38<br>37<br>32<br>36                                                        | M3: Oxidation                                    | 665.0271<br>778.8655<br>557.3148<br>588.3204                                                                                                               | 3<br>2<br>2<br>2                                              | 7.4<br>6.7<br>4.2<br>4.8                                                                 | 228<br>101<br>91<br>155                                                                | 246<br>113<br>100<br>164                                                        | No<br>No<br>No<br>No                                                        |
| 672 | IPI00216691                           | PFN1        | PROFILIN-1.                                                                                                                     | DSLLQDGEFMSMDLR<br>DSPSVWAAVPGK<br>SSFYVNGLTLGGQK<br>TFVNITPAEYVGLVGK<br>TLVLLMGK<br>TLVLLMGK                                                                                                                                                            | R<br>K<br>R<br>K<br>K<br>K                                    | T<br>T<br>C<br>D<br>E<br>E                                    | 95.00%<br>95.00%<br>95.00%<br>95.00%<br>95.00%<br>95.00%                                                                       | 93<br>38<br>72<br>54<br>27<br>54                                            | M11: Oxidation<br>M6: Oxidation<br>M6: Oxidation | 821.3791<br>607.3177<br>735.8907<br>822.4798<br>890.5456<br>445.7763                                                                                       | 2<br>2<br>2<br>2<br>1<br>2                                    | 4.4<br>4.8<br>9.7<br>8.8<br>7.7<br>6.8                                                   | 76<br>27<br>57<br>39<br>109<br>109                                                     | 89<br>38<br>No<br>54<br>116<br>116                                              | No<br>No<br>No<br>No<br>No<br>No                                            |

|     |                                                                                                                                                                                                                                          |                      |                                                                                                                                                                                                                                                                                                                                                                                                                                                                                                     |                                                                                                                                                                                                                                                 |                                                                                  |                                                                             |                                                                                                                                                                  |                                                                                      |                                                                                                                                                    |                                                              |                                                                                      |                                                                                   |                                                                                   |                                                                                |
|-----|------------------------------------------------------------------------------------------------------------------------------------------------------------------------------------------------------------------------------------------|----------------------|-----------------------------------------------------------------------------------------------------------------------------------------------------------------------------------------------------------------------------------------------------------------------------------------------------------------------------------------------------------------------------------------------------------------------------------------------------------------------------------------------------|-------------------------------------------------------------------------------------------------------------------------------------------------------------------------------------------------------------------------------------------------|----------------------------------------------------------------------------------|-----------------------------------------------------------------------------|------------------------------------------------------------------------------------------------------------------------------------------------------------------|--------------------------------------------------------------------------------------|----------------------------------------------------------------------------------------------------------------------------------------------------|--------------------------------------------------------------|--------------------------------------------------------------------------------------|-----------------------------------------------------------------------------------|-----------------------------------------------------------------------------------|--------------------------------------------------------------------------------|
| 673 | IPI00216697; IPI00297532; IPI00374973; IPI00646300; IPI00654646; IPI00744408; IPI00744846; IPI00744895; IPI00744986; IPI00745246; IPI00745348; IPI00747536; IPI00747552; IPI00748074; IPI00748330; IPI00748439; IPI00748895; IPI00749301 | ANK1                 | ISOFORM ER1 OF ANKYRIN-1.; ISOFORM ER2 OF ANKYRIN-1.; ISOFORM ER3 OF ANKYRIN-1.; ISOFORM ER16 OF ANKYRIN-1.; ISOFORM ER5 OF ANKYRIN-1.; ISOFORM ER7 OF ANKYRIN-1.; ISOFORM ER10 OF ANKYRIN-1.; ISOFORM ER6 OF ANKYRIN-1.; ISOFORM ER9 OF ANKYRIN-1.; 207 KDA PROTEIN.; ISOFORM ER4 OF ANKYRIN-1.; ISOFORM ER11 OF ANKYRIN-1.; ISOFORM ER8 OF ANKYRIN-1.; ISOFORM ER15 OF ANKYRIN-1.; ISOFORM BR21 OF ANKYRIN-1.; ISOFORM ER14 OF ANKYRIN-1.; ISOFORM ER13 OF ANKYRIN-1.; ISOFORM ER12 OF ANKYRIN-1. | ELQFSVEDINR<br>ISEILLDHGAPIQAK<br>ISEILLDHGAPIQAK<br>KGNTALHIAALAGQDEVVR<br>LALQAQVPDELVTK<br>LDQVVESPAIPR<br><br>SGLTPLHLVAQEGHVPVADVLK<br>TAAVLLQNDPNPDVLSK<br>VVTDETSFVLVSDK                                                                 | R<br>R<br>R<br>K<br>K<br>K<br><br>K<br>R<br>K                                    | I<br>T<br>T<br>E<br>L<br>I<br><br>H<br>T<br>H                               | 95.00%<br>95.00%<br>95.00%<br>95.00%<br>95.00%<br>95.00%<br><br>95.00%<br>95.00%<br>95.00%                                                                       | 48<br>44<br>28<br>45<br>54<br>47<br><br>37<br>89<br>53                               | 675.3449<br>802.9553<br>535.6401<br>655.0337<br>811.4681<br>662.3696<br><br>798.4645<br>897.9919<br>769.9070                                       | 2<br>2<br>3<br>3<br>2<br>2<br><br>3<br>2<br>2                | 8.8<br>0.8<br>2.0<br>6.5<br>7.2<br>3.0<br><br>9.3<br>8.8<br>6.9                      | 1424<br>287<br>287<br>77<br>1106<br>850<br><br>667<br>188<br>788                  | 1434<br>301<br>301<br>95<br>1120<br>861<br><br>689<br>204<br>801                  | No<br>No<br>No<br>No<br>Yes<br>No<br><br>No<br>No<br>No                        |
| 674 | IPI00217960; IPI00396630                                                                                                                                                                                                                 | LOC730418;<br>PRKACA | ISOFORM 2 OF CAMP-DEPENDENT PROTEIN KINASE, ALPHA-CATALYTIC SUBUNIT.; ISOFORM 1 OF CAMP-DEPENDENT PROTEIN KINASE, ALPHA-CATALYTIC SUBUNIT.                                                                                                                                                                                                                                                                                                                                                          | DLKPENLLIDQQGYIQVDFGFA<br>K<br><br>DNSNLYMVMVEYVPGGEMFSL<br>R<br>FPSHFSSDLKDLLR<br>ILQAVNFPFLVK<br>KVEAPFIPK<br>KWESPAQNTAHLDDQFER<br>KWESPAQNTAHLDDQFER<br>NLLQVDLTK<br>NLLQVDLTK<br>VRFPSHFSSDLKDLLR<br>VRFPSHFSSDLKDLLR<br>WFATTDWIAIYQR     | R<br><br>K<br>R<br>R<br>R<br>R<br>R<br>R<br>R<br>R<br>R<br>R<br>R<br>K<br>K<br>K | R<br><br>R<br>N<br>L<br>F<br>I<br>I<br>R<br>R<br>R<br>R<br>N<br>N<br>N<br>K | 95.00%<br><br>95.00%<br>95.00%<br>95.00%<br>95.00%<br>95.00%<br>95.00%<br>95.00%<br>95.00%<br>95.00%<br>95.00%<br>95.00%<br>95.00%<br>95.00%<br>95.00%<br>95.00% | 52<br><br>47<br>42<br>68<br>54<br>93<br>56<br>56<br>56<br>40<br>36<br>47<br>47<br>57 | 918.1508<br><br>879.7251<br>416.2234<br>694.9253<br>514.8129<br>1029.0030<br>686.3353<br>1043.6190<br>522.3110<br>639.6875<br>480.0161<br>835.9247 | 3<br><br>3<br>4<br>2<br>2<br>2<br>1<br>2<br>2<br>3<br>4<br>2 | 6.0<br><br>6.8<br>3.1<br>8.7<br>3.2<br>6.6<br>3.0<br>8.4<br>3.7<br>6.3<br>3.2<br>5.1 | 159<br><br>105<br>250<br>87<br>302<br>22<br>22<br>264<br>264<br>248<br>248<br>289 | 182<br><br>126<br>263<br>98<br>310<br>38<br>38<br>272<br>272<br>263<br>263<br>301 | No<br><br>No<br>No<br>No<br>No<br>No<br>No<br>No<br>No<br>No<br>No<br>No<br>No |
| 675 | IPI00218465; IPI00759657                                                                                                                                                                                                                 | PLAA                 | PHOSPHOLIPASE A-2-ACTIVATING PROTEIN.; PHOSPHOLIPASE A2-ACTIVATING PROTEIN ISOFORM 2.                                                                                                                                                                                                                                                                                                                                                                                                               | IGDIVGSSGANQQTSGK<br>ILPEQGLMLTGSADK                                                                                                                                                                                                            | K<br>K                                                                           | V<br>T                                                                      | 95.00%<br>95.00%                                                                                                                                                 | 65<br>41                                                                             | 802.9037<br>794.9241                                                                                                                               | 2<br>2                                                       | 7.2<br>9.1                                                                           | 377<br>159                                                                        | 393<br>173                                                                        | No<br>No                                                                       |
| 676 | IPI00218728                                                                                                                                                                                                                              | PAFAH1B1             | ISOFORM 1 OF PLATELET-ACTIVATING FACTOR ACETYLDHROLASE IB SUBUNITALPHA.                                                                                                                                                                                                                                                                                                                                                                                                                             | GHTDSVQDISFDHSGK<br>LNEAKEEFTSGGPLGQK<br>LNEAKEEFTSGGPLGQK<br>TAPYVVTGSDVQTVK<br>ALTGHLEEVVLALLK<br>ALTGHLEEVVLALLK<br>GDRSEDFGVNEDLADSDAR<br>GGPGSAVSPYPTFNPSDVAAL<br>HK<br>GLGTDEDTLIEILASR<br>GVDEATIIDLTK<br>SEDFGVNEDLADSDAR<br>TPAQFDAELR | K<br>K<br>K<br>K<br>K<br>K<br>K<br>K<br>K<br>K<br>K<br>R<br>R<br>K               | L<br>R<br>R<br>V<br>T<br>T<br>A<br>A<br>A<br>T<br>R<br>A<br>A               | 95.00%<br>95.00%<br>95.00%<br>95.00%<br>95.00%<br>95.00%<br>95.00%<br>95.00%<br>95.00%<br>95.00%<br>95.00%<br>95.00%<br>95.00%<br>95.00%                         | 31<br>103<br>36<br>70<br>104<br>55<br>46<br><br>52<br>104<br>75<br>97<br>71          | 577.2664<br>902.9658<br>602.3113<br>782.9196<br>803.4899<br>535.9944<br>689.9705<br><br>786.0644<br>851.9543<br>694.3931<br>870.3769<br>631.8081   | 3<br>2<br>3<br>2<br>2<br>3<br>3<br><br>3<br>2<br>2<br>2      | 3.0<br>8.5<br>5.5<br>5.8<br>8.5<br>5.9<br>5.0<br><br>8.6<br>8.2<br>6.9<br>5.7<br>5.2 | 148<br>72<br>72<br>391<br>99<br>99<br>186<br><br>30<br>129<br>59<br>189<br>114    | 163<br>88<br>88<br>405<br>113<br>113<br>204<br><br>53<br>144<br>71<br>204<br>124  | No<br>No<br>No<br>No<br>No<br>No<br>No<br><br>No<br>No<br>No<br>No<br>No       |
| 677 | IPI00218918                                                                                                                                                                                                                              | ANXA1                | ANNEXIN A1.                                                                                                                                                                                                                                                                                                                                                                                                                                                                                         | ALTGHLEEVVLALLK<br>ALTGHLEEVVLALLK<br>GDRSEDFGVNEDLADSDAR<br>GGPGSAVSPYPTFNPSDVAAL<br>HK<br>GLGTDEDTLIEILASR<br>GVDEATIIDLTK<br>SEDFGVNEDLADSDAR<br>TPAQFDAELR                                                                                  | K<br>K<br>K<br>K<br>K<br>K<br>K<br>R<br>R<br>K                                   | T<br>T<br>A<br>A<br>A<br>T<br>R<br>A<br>A                                   | 95.00%<br>95.00%<br>95.00%<br>95.00%<br>95.00%<br>95.00%<br>95.00%<br>95.00%<br>95.00%                                                                           | 104<br>55<br>46<br><br>52<br>104<br>75<br>97<br>71                                   | 803.4899<br>535.9944<br>689.9705<br><br>786.0644<br>851.9543<br>694.3931<br>870.3769<br>631.8081                                                   | 2<br>3<br>3<br><br>3<br>2<br>2<br>2                          | 8.5<br>5.9<br>5.0<br><br>8.6<br>8.2<br>6.9<br>5.7<br>5.2                             | 99<br>99<br>186<br><br>30<br>129<br>59<br>189<br>114                              | 113<br>113<br>204<br><br>53<br>144<br>71<br>204<br>124                            | No<br>No<br>No<br><br>No<br>No<br>No<br>No<br>No                               |
| 678 | IPI00219291; IPI00220300; IPI00456013; IPI00719814                                                                                                                                                                                       | ATP5J2               | ISOFORM 2 OF ATP SYNTHASE F CHAIN, MITOCHONDRIAL.; ISOFORM 1 OF ATP SYNTHASE F CHAIN, MITOCHONDRIAL.; ATP SYNTHASE, H+ TRANSPORTING, MITOCHONDRIAL F0 COMPLEX, SUBUNIT F2ISOFORM 2C.; ATP SYNTHASE, H+ TRANSPORTING, MITOCHONDRIAL F0 COMPLEX, SUBUNIT F2ISOFORM 2D.                                                                                                                                                                                                                                | DFSPSGIFGAFQR<br>LGELPSWILMR<br>APDFVFPYAPR<br>FYPEDVSEELIQDITQR<br>GMLREDAVLEYLK                                                                                                                                                               | R<br>K<br>K<br>K<br>R                                                            | E<br>D<br>L<br>L<br>I                                                       | 95.00%<br>95.00%<br>95.00%<br>95.00%<br>95.00%                                                                                                                   | 74<br>61<br>81<br>58<br>31                                                           | 714.8558<br>665.8696<br>591.8027<br>694.6777<br>518.2779                                                                                           | 2<br>2<br>2<br>3<br>3                                        | 8.7<br>9.0<br>2.3<br>6.8<br>8.7                                                      | 34<br>23<br>264<br>84<br>181                                                      | 46<br>33<br>273<br>100<br>193                                                     | No<br>No<br>Yes<br>No<br>No                                                    |
| 679 | IPI00219365                                                                                                                                                                                                                              | MSN                  | MOESIN.                                                                                                                                                                                                                                                                                                                                                                                                                                                                                             | DFSPSGIFGAFQR<br>LGELPSWILMR<br>APDFVFPYAPR<br>FYPEDVSEELIQDITQR<br>GMLREDAVLEYLK                                                                                                                                                               | R<br>K<br>K<br>K<br>R                                                            | E<br>D<br>L<br>L<br>I                                                       | 95.00%<br>95.00%<br>95.00%<br>95.00%<br>95.00%                                                                                                                   | 74<br>61<br>81<br>58<br>31                                                           | 714.8558<br>665.8696<br>591.8027<br>694.6777<br>518.2779                                                                                           | 2<br>2<br>2<br>3<br>3                                        | 8.7<br>9.0<br>2.3<br>6.8<br>8.7                                                      | 34<br>23<br>264<br>84<br>181                                                      | 46<br>33<br>273<br>100<br>193                                                     | No<br>No<br>Yes<br>No<br>No                                                    |

|     |                                                                    |                      |                                                                                                                                                                    |                       |   |   |        |     |                                                                                                            |           |   |      |      |      |     |
|-----|--------------------------------------------------------------------|----------------------|--------------------------------------------------------------------------------------------------------------------------------------------------------------------|-----------------------|---|---|--------|-----|------------------------------------------------------------------------------------------------------------|-----------|---|------|------|------|-----|
|     |                                                                    |                      |                                                                                                                                                                    | IAQDLEMYGVNYFSIK      | K | N | 95.00% | 82  | M7: Oxidation                                                                                              | 953.9747  | 2 | 8.1  | 194  | 209  | No  |
|     |                                                                    |                      |                                                                                                                                                                    | IGFPWSEIR             | K | N | 95.00% | 65  |                                                                                                            | 552.7990  | 2 | 5.2  | 238  | 246  | Yes |
|     |                                                                    |                      |                                                                                                                                                                    | LLFLQVK               | R | E | 95.00% | 40  |                                                                                                            | 447.7807  | 2 | 9.2  | 101  | 107  | Yes |
|     |                                                                    |                      |                                                                                                                                                                    | QLFDQVVK              | K | T | 95.00% | 42  |                                                                                                            | 488.7801  | 2 | 5.5  | 28   | 35   | Yes |
|     |                                                                    |                      |                                                                                                                                                                    | RKPDTEIVQQMK          | R | A | 95.00% | 37  | M11: Oxidation                                                                                             | 744.9012  | 2 | 6.6  | 295  | 306  | Yes |
|     |                                                                    |                      |                                                                                                                                                                    | RKPDTEIVQQMK          | R | A | 95.00% | 33  | M11: Oxidation                                                                                             | 496.9362  | 3 | 5.4  | 295  | 306  | Yes |
|     |                                                                    |                      |                                                                                                                                                                    | TQEQLALEMAELTAR       | K | I | 95.00% | 72  | M9: Oxidation                                                                                              | 860.4392  | 2 | 6.8  | 413  | 427  | No  |
|     |                                                                    |                      |                                                                                                                                                                    | VTTMDAELEFAIQPNTTGK   | R | Q | 95.00% | 133 | M4: Oxidation                                                                                              | 1041.5160 | 2 | 8.1  | 9    | 27   | Yes |
| 680 | IPI00219682; IPI00377081                                           | STOM                 | ERYTHROCYTE BAND 7 INTEGRAL MEMBRANE PROTEIN.; STOMATIN ISOFORM B.                                                                                                 | EASMVITESPAALQLR      | K | Y | 95.00% | 92  | M4: Oxidation                                                                                              | 866.4568  | 2 | 6.1  | 236  | 251  | No  |
|     |                                                                    |                      |                                                                                                                                                                    | LPDSFKDPSK            | R | G | 95.00% | 30  |                                                                                                            | 610.8157  | 2 | 5.8  | 15   | 25   | No  |
|     |                                                                    |                      |                                                                                                                                                                    | NSTIVFPLPIDMLQGIIGAK  | K | H | 95.00% | 32  | M12: Oxidation<br>M2: Oxidation, M9:<br>Oxidation, M10:<br>Oxidation, M11:<br>Oxidation, M12:<br>Oxidation | 715.0734  | 3 | 9.6  | 264  | 283  | No  |
| 681 | IPI00219772                                                        | NDUF7                | NADH DEHYDROGENASE [UBIQUINONE] 1 BETA SUBCOMPLEX SUBUNIT 7.                                                                                                       | EMVATQQEMMDAQLR       | R | L | 95.00% | 77  |                                                                                                            | 914.9050  | 2 | 7.7  | 38   | 52   | No  |
|     |                                                                    | LOC727762;<br>NDUF84 | NADH DEHYDROGENASE [UBIQUINONE] 1 BETA SUBCOMPLEX SUBUNIT 4.                                                                                                       | EREMVATQQEMMDAQLR     | K | L | 95.00% | 55  |                                                                                                            | 705.3222  | 3 | 9.1  | 36   | 52   | No  |
| 682 | IPI00220059                                                        |                      |                                                                                                                                                                    | EYLLQYNDPNRR          | R | G | 95.00% | 32  |                                                                                                            | 790.9011  | 2 | 7.6  | 46   | 57   | No  |
|     |                                                                    |                      |                                                                                                                                                                    | GLIENPALLR            | R | W | 95.00% | 63  |                                                                                                            | 548.3329  | 2 | 4.7  | 58   | 67   | No  |
| 683 | IPI00220503; IPI00793544                                           | DCTN2                | DYNACTIN 2.; 42 KDA PROTEIN.                                                                                                                                       | ENLATVEGNFASIDER      | R | M | 95.00% | 141 |                                                                                                            | 882.9319  | 2 | 8.9  | 385  | 400  | No  |
|     |                                                                    |                      |                                                                                                                                                                    | LLGPDAAINLTDPDGALAK   | K | R | 95.00% | 91  |                                                                                                            | 933.0141  | 2 | 9.6  | 162  | 180  | No  |
|     |                                                                    |                      |                                                                                                                                                                    | LLHEVQELTTEVEK        | R | I | 95.00% | 85  |                                                                                                            | 834.4536  | 2 | 8.1  | 111  | 124  | No  |
|     |                                                                    |                      |                                                                                                                                                                    | LLLQLEATK             | R | N | 95.00% | 41  |                                                                                                            | 514.8234  | 2 | 3.2  | 182  | 190  | No  |
|     |                                                                    |                      |                                                                                                                                                                    | TGYESGEYEMLGEGLGVK    | R | E | 95.00% | 113 | M10: Oxidation                                                                                             | 967.9429  | 2 | 4.4  | 84   | 101  | No  |
|     |                                                                    |                      |                                                                                                                                                                    | VSALDLAVLDQVEAR       | K | L | 95.00% | 89  |                                                                                                            | 799.9472  | 2 | 6.9  | 273  | 287  | No  |
|     |                                                                    |                      |                                                                                                                                                                    | YADLPGIAR             | K | N | 95.00% | 38  |                                                                                                            | 488.2691  | 2 | 4.0  | 6    | 14   | No  |
| 684 | IPI00220834                                                        | XRCC5                | ATP-DEPENDENT DNA HELICASE 2 SUBUNIT 2.                                                                                                                            | ANPQVGVAFPHIK         | R | H | 95.00% | 46  |                                                                                                            | 689.3901  | 2 | 5.8  | 401  | 413  | No  |
|     |                                                                    |                      |                                                                                                                                                                    | HIEIFDLSRR            | R | F | 95.00% | 52  |                                                                                                            | 659.3478  | 2 | 5.6  | 131  | 141  | No  |
|     |                                                                    |                      |                                                                                                                                                                    | HLMLPDFDLEDIESK       | R | I | 95.00% | 85  | M3: Oxidation                                                                                              | 965.9846  | 2 | 7.1  | 82   | 97   | No  |
|     |                                                                    |                      |                                                                                                                                                                    | HLMLPDFDLEDIESK       | R | I | 95.00% | 38  | M3: Oxidation                                                                                              | 644.3265  | 3 | 8.5  | 87   | 97   | No  |
|     |                                                                    |                      |                                                                                                                                                                    | LTIGSNLSIR            | R | I | 95.00% | 63  |                                                                                                            | 537.3196  | 2 | -0.7 | 251  | 260  | No  |
|     |                                                                    |                      |                                                                                                                                                                    | TDTLEDLFPTTK          | K | I | 95.00% | 57  |                                                                                                            | 690.8536  | 2 | 6.5  | 470  | 481  | No  |
|     |                                                                    |                      |                                                                                                                                                                    | YGSDIVPFSK            | R | V | 95.00% | 41  |                                                                                                            | 556.7877  | 2 | 4.1  | 316  | 325  | No  |
| 685 | IPI00220991; IPI00333383; IPI00784156;<br>IPI00784366; IPI00790702 | AP2B1                | HYPOTHETICAL PROTEIN DKFZP781K0743.; 105 KDA PROTEIN.; ISOFORM 1 OF AP-2 COMPLEX SUBUNIT BETA-1.; ISOFORM 2 OF AP-2 COMPLEX SUBUNIT BETA-1.; BETA ADAPTIN SUBUNIT. | LAPPLVTLSSGEPEVQYVALR | K | N | 95.00% | 42  |                                                                                                            | 755.7730  | 3 | 7.8  | 284  | 304  | No  |
|     |                                                                    |                      |                                                                                                                                                                    | MEPLNLLQVAVK          | K | N | 95.00% | 32  | M1: Oxidation                                                                                              | 686.3740  | 2 | 7.0  | 813  | 824  | No  |
| 686 | IPI00255052; IPI00790752                                           | NDUF89               | NADH DEHYDROGENASE [UBIQUINONE] 1 BETA SUBCOMPLEX SUBUNIT 9.; NADH-UBIQUINONE OXIDOREDUCTASE B22 SUBUNIT.                                                          | EAEFEFWYR             | K | Q | 95.00% | 43  |                                                                                                            | 629.7769  | 2 | 6.4  | 66   | 74   | No  |
|     |                                                                    |                      |                                                                                                                                                                    | QHPQPIYFPDPPGGTYSYR   | R | Y | 95.00% | 53  |                                                                                                            | 726.0149  | 3 | 8.8  | 75   | 93   | No  |
|     |                                                                    |                      |                                                                                                                                                                    | QLQEETPPGGPLTEALPPAR  | K | K | 95.00% | 74  |                                                                                                            | 1051.0570 | 2 | 5.8  | 139  | 158  | No  |
| 687 | IPI00289334; IPI00382696; IPI00477536;<br>IPI00480131              | FLNB                 | ISOFORM 1 OF FILAMIN-B.; ISOFORM 2 OF FILAMIN-B.; FILAMIN B.; 278 KDA PROTEIN.                                                                                     | DAGYGGISLAVEGPSK      | R | V | 95.00% | 31  |                                                                                                            | 760.8905  | 2 | 8.7  | 2029 | 2044 | No  |
|     |                                                                    |                      |                                                                                                                                                                    | EAGAGGLSIAVEGPSK      | R | A | 95.00% | 107 |                                                                                                            | 721.8835  | 2 | 6.9  | 2220 | 2235 | Yes |
|     |                                                                    |                      |                                                                                                                                                                    | IQQNTFTR              | K | W | 95.00% | 40  |                                                                                                            | 504.2716  | 2 | 7.9  | 17   | 24   | Yes |
|     |                                                                    |                      |                                                                                                                                                                    | LIALLEVLSQK           | R | R | 95.00% | 103 |                                                                                                            | 613.8940  | 2 | 6.3  | 50   | 60   | Yes |
|     |                                                                    |                      |                                                                                                                                                                    | LIALLEVLSQK           | R | R | 95.00% | 37  |                                                                                                            | 409.5990  | 3 | 7.2  | 50   | 60   | Yes |
|     |                                                                    |                      |                                                                                                                                                                    | LIALLEVLSQKR          | R | M | 95.00% | 74  |                                                                                                            | 691.9453  | 2 | 6.5  | 50   | 61   | Yes |
|     |                                                                    |                      |                                                                                                                                                                    | LIALLEVLSQKR          | R | M | 95.00% | 56  |                                                                                                            | 461.6335  | 3 | 8.0  | 50   | 61   | Yes |
|     |                                                                    |                      |                                                                                                                                                                    | LLGWIQNK              | R | I | 95.00% | 61  |                                                                                                            | 486.2915  | 2 | 7.5  | 145  | 152  | No  |
|     |                                                                    |                      |                                                                                                                                                                    | SPFTYVGAAPLDLSK       | K | I | 95.00% | 75  |                                                                                                            | 751.4233  | 2 | 8.0  | 932  | 946  | No  |
| 688 | IPI00291136                                                        | COL6A1               | COLLAGEN ALPHA-1(VI) CHAIN PRECURSOR.                                                                                                                              | GLEQLLVGGSHLK         | K | E | 95.00% | 46  |                                                                                                            | 450.9336  | 3 | 7.7  | 136  | 148  | No  |
|     |                                                                    |                      |                                                                                                                                                                    | LLLFSDGNSQGATPAAIEK   | R | A | 95.00% | 134 |                                                                                                            | 966.5156  | 2 | 7.9  | 939  | 957  | No  |
|     |                                                                    |                      |                                                                                                                                                                    | VAVVQYSGTQQRRPER      | R | A | 95.00% | 36  |                                                                                                            | 592.3162  | 3 | 7.2  | 873  | 888  | No  |
|     |                                                                    |                      |                                                                                                                                                                    | VFSVAITPDHLEPR        | K | L | 95.00% | 28  |                                                                                                            | 527.6233  | 3 | 6.6  | 186  | 199  | No  |
|     |                                                                    |                      |                                                                                                                                                                    | VPSYQALLR             | R | G | 95.00% | 60  |                                                                                                            | 523.8066  | 2 | 5.2  | 1006 | 1014 | No  |
| 689 | IPI00291328; IPI00646556; IPI00793910                              | NDUFV2               | NADH DEHYDROGENASE [UBIQUINONE] FLAVOPROTEIN 2, MITOCHONDRIALPRECURSOR.; 28 KDA PROTEIN.; 24-KDA SUBUNIT OF COMPLEX I.                                             | AAAVLPVLDLAQR         | K | Q | 95.00% | 83  |                                                                                                            | 668.9064  | 2 | 7.2  | 76   | 88   | No  |
|     |                                                                    |                      |                                                                                                                                                                    | DIEEIIDELK            | K | A | 95.00% | 48  |                                                                                                            | 608.8222  | 2 | 4.1  | 200  | 209  | No  |
|     |                                                                    |                      |                                                                                                                                                                    | NSDSILEAIQK           | R | K | 95.00% | 58  |                                                                                                            | 609.3267  | 2 | 6.3  | 144  | 154  | No  |

| Protein ID     | Gene                                  | Protein Name | Sequence                                                                                                                            | Start                    | End                                         | Score | Length | Mass | Charge                                       | Modifications | Abundance | Retention | Label |     |  |
|----------------|---------------------------------------|--------------|-------------------------------------------------------------------------------------------------------------------------------------|--------------------------|---------------------------------------------|-------|--------|------|----------------------------------------------|---------------|-----------|-----------|-------|-----|--|
| 690            | IPI00291866; IPI00556459              | SERPING1     | PLASMA PROTEASE C1 INHIBITOR PRECURSOR.;<br>SERINE/CYSTEINE PROTEINASE INHIBITOR<br>CLADE G MEMBER 1 SPLICE VARIANT<br>2(FRAGMENT). | FQPTLLTLPR               | K                                           | I     | 95.00% | 33   | 593.3569                                     | 2             | 5.1       | 391       | 400   | No  |  |
|                |                                       |              |                                                                                                                                     | GVTSVSIQIFHSPDLAIR       | K                                           | D     | 95.00% | 79   | 913.9996                                     | 2             | 8.1       | 217       | 233   | No  |  |
|                |                                       |              |                                                                                                                                     | GVTSVSIQIFHSPDLAIR       | K                                           | D     | 95.00% | 60   | 609.6672                                     | 3             | 5.0       | 217       | 233   | No  |  |
|                |                                       |              |                                                                                                                                     | TNLESILSYPK              | K                                           | D     | 95.00% | 46   | 632.8493                                     | 2             | 9.3       | 191       | 201   | No  |  |
| 691            | IPI00292530                           | ITI1         | INTER-ALPHA-TRYPsin INHIBITOR HEAVY CHAIN<br>H1 PRECURSOR.                                                                          | VTTSQDMLSIMEK            | K                                           | L     | 95.00% | 56   | M7: Oxidation,<br>M11: Oxidation<br>757.8637 | 2             | 7.4       | 403       | 415   | No  |  |
|                |                                       |              |                                                                                                                                     | EVAFDLEIPK               | R                                           | T     | 95.00% | 47   | 580.8180                                     | 2             | 6.6       | 84        | 93    | No  |  |
|                |                                       |              |                                                                                                                                     | FAHYVVTsqVVNTANEAR       | R                                           | E     | 95.00% | 86   | 1003.5190                                    | 2             | 10.0      | 66        | 83    | No  |  |
|                |                                       |              |                                                                                                                                     | IYEDHDATQQLQGFYSQVAK     | R                                           | P     | 95.00% | 35   | 781.0484                                     | 3             | 8.3       | 458       | 477   | No  |  |
| 692            | IPI00294216; IPI00373875; IPI00746318 | SGCD         | DELTA-SARCOGLYCAN.; DELTA-SARCOGLYCAN<br>ISOFORM 2.; DELTA-SARCOGLYCAN ISOFORM 1.                                                   | VLGAEGTVFPK              | R                                           | S     | 95.00% | 44   | 559.3217                                     | 2             | 8.5       | 166       | 176   | No  |  |
|                |                                       |              |                                                                                                                                     | VLTQLITGPK               | K                                           | A     | 95.00% | 28   | 535.3367                                     | 2             | 3.0       | 121       | 130   | No  |  |
| 693            | IPI00297084                           | DDOST        | DOLICHYL-DIPHOSPHOOLIGOSACCHARIDE-<br>PROTEIN<br>GLYCOSYLTRANSFERASEPRECURSOR.                                                      | GFELTFK                  | R                                           | T     | 95.00% | 31   | 421.2288                                     | 2             | 4.4       | 71        | 77    | No  |  |
|                |                                       |              |                                                                                                                                     | LPDVYGVFQFK              | K                                           | V     | 95.00% | 45   | 656.8543                                     | 2             | 4.9       | 381       | 391   | No  |  |
|                |                                       |              |                                                                                                                                     | NTLLIAGLQAR              | K                                           | N     | 95.00% | 80   | 585.3574                                     | 2             | 5.2       | 240       | 250   | No  |  |
|                |                                       |              |                                                                                                                                     | SSLNPILFR                | K                                           | G     | 95.00% | 53   | 523.8059                                     | 2             | 3.8       | 190       | 198   | No  |  |
|                |                                       |              |                                                                                                                                     | TADDPSSLJK               | K                                           | Y     | 95.00% | 61   | 580.3167                                     | 2             | 3.6       | 78        | 88    | No  |  |
|                |                                       |              |                                                                                                                                     | TAVIDHHNYDISDLGQHTLIVADT | K                                           | A     | 95.00% | 64   | 812.1748                                     | 4             | 9.8       | 154       | 182   | No  |  |
| 694            | IPI00297626                           | STXBP3       | SYNTAXIN-BINDING PROTEIN 3.                                                                                                         | TLVLLDNLNVR              | R                                           | E     | 95.00% | 69   | 635.3847                                     | 2             | 6.6       | 47        | 57    | No  |  |
|                |                                       |              |                                                                                                                                     | WVPFDGDDIQLEFVR          | K                                           | I     | 95.00% | 50   | 918.4614                                     | 2             | 9.8       | 345       | 359   | No  |  |
|                |                                       |              |                                                                                                                                     | YSQTGNVELAVALSR          | R                                           | W     | 95.00% | 105  | 836.4265                                     | 2             | 6.6       | 283       | 297   | No  |  |
|                |                                       |              |                                                                                                                                     | LLDDIKMLNKPK             | K                                           | D     | 95.00% | 25   | M7: Oxidation<br>722.4186                    | 2             | 3.1       | 572       | 583   | No  |  |
|                |                                       |              |                                                                                                                                     | VLLPVLLNK                | R                                           | N     | 95.00% | 46   | 504.8477                                     | 2             | 5.3       | 389       | 397   | No  |  |
|                |                                       |              |                                                                                                                                     | AHYGGFTVQNEANK           | K                                           | Y     | 95.00% | 76   | 768.3720                                     | 2             | 7.8       | 354       | 367   | No  |  |
| 695            | IPI00298497                           | FGB          | FIBRINOGEN BETA CHAIN PRECURSOR.                                                                                                    | DNENVVNYSSELEK           | K                                           | H     | 95.00% | 98   | 884.9029                                     | 2             | 5.9       | 164       | 178   | No  |  |
|                |                                       |              |                                                                                                                                     | EEAPSLRPAPPPIGGGYR       | R                                           | A     | 95.00% | 36   | 651.0085                                     | 3             | 3.0       | 54        | 72    | No  |  |
|                |                                       |              |                                                                                                                                     | HQLYIDETVNSNIPTNLR       | K                                           | V     | 95.00% | 41   | 709.7038                                     | 3             | 5.7       | 179       | 196   | No  |  |
|                |                                       |              |                                                                                                                                     | QGFGNVATNTDGK            | K                                           | N     | 95.00% | 62   | 654.8182                                     | 2             | 7.6       | 301       | 313   | No  |  |
|                |                                       |              |                                                                                                                                     | ALSTDPAAPNLK             | K                                           | S     | 95.00% | 31   | 599.3305                                     | 2             | 4.3       | 1333      | 1344  | No  |  |
|                |                                       |              |                                                                                                                                     | AVASAAAALVLK             | K                                           | A     | 95.00% | 41   | 542.8449                                     | 2             | 8.2       | 674       | 685   | No  |  |
| 696            | IPI00298994; IPI00784273              | TLN1         | 271 KDA PROTEIN.; TALIN-1.                                                                                                          | GLAGAVSELLR              | K                                           | S     | 95.00% | 58   | 543.3212                                     | 2             | 2.2       | 614       | 624   | No  |  |
|                |                                       |              |                                                                                                                                     | GVGAAATAVTQALNELLQHVK    | R                                           | A     | 95.00% | 32   | 697.7280                                     | 3             | 5.8       | 766       | 786   | No  |  |
|                |                                       |              |                                                                                                                                     | LAQAQQSSVATITR           | K                                           | L     | 95.00% | 77   | 708.8998                                     | 2             | 7.6       | 2056      | 2069  | No  |  |
|                |                                       |              |                                                                                                                                     | TLAESALQLLYTAK           | K                                           | E     | 95.00% | 49   | 761.4366                                     | 2             | 8.2       | 1767      | 1780  | No  |  |
|                |                                       |              |                                                                                                                                     | GGAAGTAGVGETGSGDQAGGE    | GK                                          |       |        |      |                                              |               |           |           |       |     |  |
|                |                                       |              |                                                                                                                                     | GK                       | R                                           | H     | 95.00% | 80   | 945.9318                                     | 2             | 6.6       | 154       | 176   | No  |  |
| 697            | IPI00300502                           | MYOZ1        | MYOZENIN-1.                                                                                                                         | GGAAGTAGVGETGSGDQAGGE    | GK                                          |       |        |      |                                              |               |           |           |       |     |  |
|                |                                       |              |                                                                                                                                     | GK                       | R                                           | H     | 95.00% | 33   | 630.9585                                     | 3             | 8.7       | 154       | 176   | No  |  |
|                |                                       |              |                                                                                                                                     | LIMELTGGGQESSLNLGKK      | K                                           | I     | 95.00% | 28   | M3: Oxidation<br>683.3657                    | 3             | 5.6       | 18        | 37    | No  |  |
|                |                                       |              |                                                                                                                                     | ADIAESQVNK               | R                                           | L     | 95.00% | 81   | 537.7761                                     | 2             | 1.1       | 1912      | 1921  | Yes |  |
|                |                                       |              |                                                                                                                                     | ADIAESQVNLKLR            | R                                           | A     | 95.00% | 34   | 448.5825                                     | 3             | 2.7       | 1912      | 1923  | Yes |  |
|                |                                       |              |                                                                                                                                     | AGLLGLLEEMR              | K                                           | D     | 95.00% | 88   | M10: Oxidation<br>609.3354                   | 2             | 5.2       | 769       | 779   | Yes |  |
|                |                                       |              |                                                                                                                                     | AGLLGLLEEMR              | K                                           | D     | 95.00% | 58   | M10: Oxidation<br>406.5597                   | 3             | 5.7       | 769       | 779   | Yes |  |
|                |                                       |              |                                                                                                                                     | AGLLGLLEEMR              | K                                           | D     | 95.00% | 62   | 1201.6510                                    | 1             | -9.1      | 769       | 779   | Yes |  |
|                |                                       |              |                                                                                                                                     | AGLLGLLEEMR              | K                                           | D     | 95.00% | 94   | 601.3371                                     | 2             | 3.9       | 769       | 779   | Yes |  |
|                |                                       |              |                                                                                                                                     | AGLLGLLEEMRDER           | K                                           | L     | 95.00% | 50   | M10: Oxidation<br>809.4238                   | 2             | 7.7       | 769       | 782   | Yes |  |
|                |                                       |              |                                                                                                                                     | AGLLGLLEEMRDER           | K                                           | L     | 95.00% | 68   | M10: Oxidation<br>539.9509                   | 3             | 6.0       | 769       | 782   | Yes |  |
|                |                                       |              |                                                                                                                                     | AGLLGLLEEMRDER           | K                                           | L     | 95.00% | 46   | 801.4236                                     | 2             | 4.3       | 769       | 782   | Yes |  |
|                |                                       |              |                                                                                                                                     | AGLLGLLEEMRDER           | K                                           | L     | 95.00% | 54   | 534.6177                                     | 3             | 3.2       | 769       | 782   | Yes |  |
|                |                                       |              |                                                                                                                                     | AITDAAMMAEELK            | K                                           | K     | 95.00% | 84   | M7: Oxidation, M8:<br>Oxidation<br>713.3408  | 2             | 9.2       | 1760      | 1772  | Yes |  |
|                |                                       |              |                                                                                                                                     | AITDAAMMAEELKK           | K                                           | E     | 95.00% | 102  | M7: Oxidation<br>769.3866                    | 2             | 3.0       | 1760      | 1773  | Yes |  |
|                |                                       |              |                                                                                                                                     | AITDAAMMAEELKK           | K                                           | E     | 95.00% | 44   | M7: Oxidation<br>513.2606                    | 3             | 3.4       | 1760      | 1773  | Yes |  |
| AITDAAMMAEELKK | K                                     | E            | 95.00%                                                                                                                              | 83                       | M7: Oxidation<br>777.3852                   | 2     | 4.5    | 1760 | 1773                                         | Yes           |           |           |       |     |  |
| AITDAAMMAEELKK | K                                     | E            | 95.00%                                                                                                                              | 48                       | M7: Oxidation<br>518.5920                   | 3     | 3.1    | 1760 | 1773                                         | Yes           |           |           |       |     |  |
| AITDAAMMAEELKK | K                                     | E            | 95.00%                                                                                                                              | 83                       | M7: Oxidation, M8:<br>Oxidation<br>777.3852 | 2     | 4.5    | 1760 | 1773                                         | Yes           |           |           |       |     |  |
| AITDAAMMAEELKK | K                                     | E            | 95.00%                                                                                                                              | 48                       | M7: Oxidation, M8:<br>Oxidation<br>518.5920 | 3     | 3.1    | 1760 | 1773                                         | Yes           |           |           |       |     |  |
| AITDAAMMAEELKK | K                                     | E            | 95.00%                                                                                                                              | 97                       | M8: Oxidation<br>769.3875                   | 2     | 4.2    | 1760 | 1773                                         | Yes           |           |           |       |     |  |
| AITDAAMMAEELKK | K                                     | E            | 95.00%                                                                                                                              | 52                       | M8: Oxidation<br>513.2598                   | 3     | 1.9    | 1760 | 1773                                         | Yes           |           |           |       |     |  |
| AITDAAMMAEELKK | K                                     | E            | 95.00%                                                                                                                              | 111                      | M8: Oxidation<br>761.3883                   | 2     | 1.9    | 1760 | 1773                                         | Yes           |           |           |       |     |  |

|                         |   |   |        |     |                                   |           |   |     |      |      |     |
|-------------------------|---|---|--------|-----|-----------------------------------|-----------|---|-----|------|------|-----|
| AITDAAMMAEELKK          | K | E | 95.00% | 77  |                                   | 507.9281  | 3 | 1.8 | 1760 | 1773 | Yes |
| AITDAAMMAEELKKEQDTSAHLE |   |   |        |     | M7: Oxidation, M8:                |           |   |     |      |      |     |
| R                       | K | M | 95.00% | 37  | Oxidation                         | 907.4404  | 3 | 6.9 | 1760 | 1783 | Yes |
| ALQEAHQALDDLQVEEDKVNS   |   |   |        |     |                                   |           |   |     |      |      |     |
| LSK                     | K | S | 95.00% | 44  |                                   | 702.8600  | 4 | 5.4 | 1000 | 1024 | No  |
| ANDDLKENIAIVER          | R | R | 95.00% | 120 |                                   | 800.4223  | 2 | 1.5 | 1665 | 1678 | Yes |
| ANDDLKENIAIVER          | R | R | 95.00% | 63  |                                   | 533.9522  | 3 | 4.1 | 1665 | 1678 | Yes |
| ANDDLKENIAIVERR         | R | N | 95.00% | 58  |                                   | 878.4757  | 2 | 4.6 | 1665 | 1679 | Yes |
| ANDDLKENIAIVERR         | R | N | 95.00% | 70  |                                   | 585.9875  | 3 | 6.6 | 1665 | 1679 | Yes |
| ANDDLKENIAIVERR         | R | N | 95.00% | 28  |                                   | 439.7414  | 4 | 3.9 | 1665 | 1679 | Yes |
| ANSEVAQWR               | K | T | 95.00% | 51  |                                   | 1060.5220 | 1 | 4.5 | 1366 | 1374 | Yes |
| ANSEVAQWR               | K | T | 95.00% | 66  |                                   | 530.7642  | 2 | 2.9 | 1366 | 1374 | Yes |
| AQLEFNQIK               | R | A | 95.00% | 43  |                                   | 1090.5980 | 1 | 7.5 | 1563 | 1571 | Yes |
| AQLEFNQIK               | R | A | 95.00% | 75  |                                   | 545.8004  | 2 | 2.8 | 1563 | 1571 | Yes |
| AQLEFNQIKAEIER          | R | K | 95.00% | 91  |                                   | 844.9600  | 2 | 8.7 | 1563 | 1576 | Yes |
| AVVEQTER                | R | S | 95.00% | 72  |                                   | 466.2471  | 2 | 1.7 | 1692 | 1699 | Yes |
| DIDDLELTLAK             | K | V | 95.00% | 54  |                                   | 1245.6670 | 1 | 7.2 | 955  | 965  | Yes |
| DIDDLELTLAK             | K | V | 95.00% | 99  |                                   | 623.3342  | 2 | 1.9 | 955  | 965  | Yes |
| DLEEATLQHEATAAALR       | R | K | 95.00% | 138 |                                   | 919.9714  | 2 | 5.4 | 1179 | 1195 | Yes |
| DLEEATLQHEATAAALR       | R | K | 95.00% | 67  |                                   | 613.6491  | 3 | 3.6 | 1179 | 1195 | Yes |
| DLEEATLQHEATAAALRK      | R | K | 95.00% | 119 |                                   | 984.0176  | 2 | 3.8 | 1179 | 1196 | Yes |
| DLEEATLQHEATAAALRK      | R | K | 95.00% | 75  |                                   | 656.3477  | 3 | 3.8 | 1179 | 1196 | Yes |
| DLQHRLEAEQIALK          | K | G | 95.00% | 52  |                                   | 889.9805  | 2 | 7.1 | 1794 | 1808 | Yes |
| DLQHRLEAEQIALK          | K | G | 95.00% | 58  |                                   | 593.6564  | 3 | 7.3 | 1794 | 1808 | Yes |
| DTQIQLDDAVR             | K | A | 95.00% | 55  |                                   | 1273.6480 | 1 | 6.6 | 1654 | 1664 | Yes |
| DTQIQLDDAVR             | K | A | 95.00% | 94  |                                   | 637.3256  | 2 | 3.5 | 1654 | 1664 | Yes |
| EAEFQK                  | R | M | 95.00% | 32  |                                   | 751.3677  | 1 | 6.7 | 1170 | 1175 | Yes |
| EALISQLTR               | K | G | 95.00% | 46  |                                   | 1030.5930 | 1 | 2.7 | 1297 | 1305 | Yes |
| EALISQLTR               | K | G | 95.00% | 61  |                                   | 515.8003  | 2 | 2.8 | 1297 | 1305 | Yes |
| EKSEFKLEDDVTSNMEQIIK    | K | A | 95.00% | 79  | M16: Oxidation                    | 838.0959  | 3 | 9.1 | 1222 | 1242 | Yes |
| EKSEFKLEDDVTSNMEQIIK    | K | A | 95.00% | 33  | M16: Oxidation                    | 628.8243  | 4 | 9.7 | 1222 | 1242 | Yes |
| EKSEFKLEDDVTSNMEQIIK    | K | A | 95.00% | 84  |                                   | 832.7598  | 3 | 3.7 | 1222 | 1242 | Yes |
| EKSEFKLEDDVTSNMEQIIK    | K | A | 95.00% | 35  |                                   | 624.8219  | 4 | 3.9 | 1222 | 1242 | Yes |
| ELEEISER                | R | L | 95.00% | 49  |                                   | 1004.4910 | 1 | 0.9 | 1144 | 1151 | Yes |
| ELEEISER                | R | L | 95.00% | 42  |                                   | 502.7503  | 2 | 2.7 | 1144 | 1151 | Yes |
| ELEEISERLEEAGGATSVQIEMN |   |   |        |     |                                   |           |   |     |      |      |     |
| K                       | R | K | 95.00% | 82  | M22: Oxidation                    | 893.4395  | 3 | 7.5 | 1144 | 1167 | Yes |
| ELEEISERLEEAGGATSVQIEMN |   |   |        |     |                                   |           |   |     |      |      |     |
| K                       | R | K | 95.00% | 56  | M22: Oxidation                    | 670.3314  | 4 | 7.1 | 1144 | 1167 | Yes |
| ELEEISERLEEAGGATSVQIEMN |   |   |        |     |                                   |           |   |     |      |      |     |
| K                       | R | K | 95.00% | 69  |                                   | 888.1052  | 3 | 4.4 | 1144 | 1167 | Yes |
| ELEEISERLEEAGGATSVQIEMN |   |   |        |     |                                   |           |   |     |      |      |     |
| KK                      | R | R | 95.00% | 68  | M22: Oxidation                    | 936.1401  | 3 | 9.5 | 1144 | 1168 | Yes |
| EMNERLEDEEEMNAELTAK     | K | K | 95.00% | 70  | M12: Oxidation,<br>M2: Oxidation, | 766.3376  | 3 | 2.6 | 923  | 941  | Yes |
| EMNERLEDEEEMNAELTAK     | K | K | 95.00% | 73  | M12: Oxidation                    | 771.6697  | 3 | 3.2 | 923  | 941  | Yes |
| ENIAIVER                | K | R | 95.00% | 41  |                                   | 472.2679  | 2 | 7.1 | 1671 | 1678 | Yes |
| ENQSILITGESGAGK         | R | T | 95.00% | 118 |                                   | 752.3882  | 2 | 1.9 | 170  | 184  | Yes |
| EQD TSAHLER             | K | M | 95.00% | 69  |                                   | 593.2841  | 2 | 8.6 | 1774 | 1783 | Yes |
| EQYEEETEAK              | R | A | 95.00% | 47  |                                   | 628.2719  | 2 | 2.3 | 1347 | 1356 | Yes |
| EQYEEETEAKAELQR         | R | V | 95.00% | 104 |                                   | 926.9355  | 2 | 3.6 | 1347 | 1361 | Yes |
| EQYEEETEAKAELQR         | R | V | 95.00% | 39  |                                   | 618.2937  | 3 | 4.8 | 1347 | 1361 | Yes |
| GSSFQTVSALHR            | K | E | 95.00% | 78  |                                   | 645.3373  | 2 | 5.1 | 643  | 654  | Yes |
| GSSFQTVSALHRENLNK       | K | L | 95.00% | 60  |                                   | 944.4929  | 2 | 5.4 | 643  | 659  | Yes |
| GTLEDQIIQANPALEAFGNAK   | K | T | 95.00% | 143 |                                   | 1100.5760 | 2 | 8.4 | 215  | 235  | Yes |
| GTLEDQIIQANPALEAFGNAK   | K | T | 95.00% | 96  |                                   | 734.0500  | 3 | 4.2 | 215  | 235  | Yes |
| HADSV AELGEQIDNLQR      | K | V | 95.00% | 166 |                                   | 947.9739  | 2 | 7.4 | 1198 | 1214 | Yes |
| HADSV AELGEQIDNLQR      | K | V | 95.00% | 85  |                                   | 632.3179  | 3 | 6.4 | 1198 | 1214 | Yes |
| HLRQNEIEDLMVDVER        | K | S | 95.00% | 86  | M11: Oxidation                    | 671.3367  | 3 | 3.6 | 1421 | 1436 | Yes |
| HLRQNEIEDLMVDVER        | K | S | 95.00% | 79  |                                   | 998.5089  | 2 | 8.8 | 1421 | 1436 | Yes |
| HLRQNEIEDLMVDVER        | K | S | 95.00% | 88  |                                   | 666.0065  | 3 | 5.7 | 1421 | 1436 | Yes |
| HLRQNEIEDLMVDVER        | K | S | 95.00% | 34  |                                   | 499.7565  | 4 | 5.1 | 1421 | 1436 | Yes |
| IEELEEELEAER            | R | T | 95.00% | 103 |                                   | 744.8617  | 2 | 5.7 | 1117 | 1128 | Yes |
| IEELEEELEAER            | R | T | 95.00% | 67  |                                   | 496.9096  | 3 | 4.0 | 1117 | 1128 | Yes |
| ILAEWK                  | K | Q | 95.00% | 33  |                                   | 759.4422  | 1 | 2.1 | 1454 | 1459 | Yes |
| ILYGDFR                 | R | Q | 95.00% | 43  |                                   | 442.2399  | 2 | 4.6 | 715  | 721  | Yes |
| INATLETK                | R | Q | 95.00% | 52  |                                   | 445.2545  | 2 | 1.9 | 444  | 451  | Yes |
| INATLETKQPR             | R | Q | 95.00% | 51  |                                   | 635.8622  | 2 | 3.6 | 444  | 454  | Yes |
| IQLEAK                  | K | V | 95.00% | 37  |                                   | 701.4219  | 1 | 2.9 | 915  | 920  | Yes |
| KAITDAAMMAEELKK         | K | E | 95.00% | 101 | M8: Oxidation                     | 833.4363  | 2 | 5.3 | 1759 | 1773 | Yes |

|                        |   |   |        |     |                                              |           |   |      |      |      |     |
|------------------------|---|---|--------|-----|----------------------------------------------|-----------|---|------|------|------|-----|
| KAITDAAMMAEELKK        | K | E | 95.00% | 81  | M8: Oxidation                                | 555.9587  | 3 | 2.7  | 1759 | 1773 | Yes |
| KAITDAAMMAEELKK        | K | E | 95.00% | 35  | M8: Oxidation                                | 417.2235  | 4 | 8.8  | 1759 | 1773 | Yes |
| KAITDAAMMAEELKK        | K | E | 95.00% | 80  | M8: Oxidation                                | 841.4315  | 2 | 2.7  | 1759 | 1773 | Yes |
| KAITDAAMMAEELKK        | K | E | 95.00% | 64  | M8: Oxidation                                | 561.2909  | 3 | 3.8  | 1759 | 1773 | Yes |
| KAITDAAMMAEELKK        | K | E | 95.00% | 80  | M8: Oxidation, M9: Oxidation                 | 841.4315  | 2 | 2.7  | 1759 | 1773 | Yes |
| KAITDAAMMAEELKK        | K | E | 95.00% | 64  | M8: Oxidation, M9: Oxidation                 | 561.2909  | 3 | 3.8  | 1759 | 1773 | Yes |
| KAITDAAMMAEELKK        | K | E | 95.00% | 103 | M9: Oxidation                                | 833.4359  | 2 | 4.9  | 1759 | 1773 | Yes |
| KAITDAAMMAEELKK        | K | E | 95.00% | 63  | M9: Oxidation                                | 555.9584  | 3 | 2.3  | 1759 | 1773 | Yes |
| KAITDAAMMAEELKK        | K | E | 95.00% | 107 |                                              | 825.4387  | 2 | 5.2  | 1759 | 1773 | Yes |
| KAITDAAMMAEELKK        | K | E | 95.00% | 92  |                                              | 550.6276  | 3 | 3.8  | 1759 | 1773 | Yes |
| KAITDAAMMAEELKK        | K | E | 95.00% | 42  |                                              | 413.2216  | 4 | 1.3  | 1759 | 1773 | Yes |
| KDIDDLELTLAK           | K | V | 95.00% | 109 |                                              | 687.3849  | 2 | 6.4  | 954  | 965  | Yes |
| KDIDDLELTLAK           | K | V | 95.00% | 44  |                                              | 458.5935  | 3 | 8.4  | 954  | 965  | Yes |
| KGSSFQTVSALHR          | K | E | 95.00% | 101 |                                              | 709.3837  | 2 | 3.0  | 642  | 654  | Yes |
| KGSSFQTVSALHR          | K | E | 95.00% | 69  |                                              | 473.2583  | 3 | 2.9  | 642  | 654  | Yes |
| KHADSVaelGEQIDNLQR     | K | V | 95.00% | 137 |                                              | 1012.0210 | 2 | 6.5  | 1197 | 1214 | Yes |
| KHADSVaelGEQIDNLQR     | K | V | 95.00% | 93  |                                              | 675.0148  | 3 | 3.8  | 1197 | 1214 | Yes |
| KHADSVaelGEQIDNLQR     | K | V | 95.00% | 66  |                                              | 506.5136  | 4 | 4.9  | 1197 | 1214 | Yes |
| KHADSVaelGEQIDNLQR     | R | V | 95.00% | 89  |                                              | 717.7142  | 3 | 5.1  | 1196 | 1214 | Yes |
| KHADSVaelGEQIDNLQR     | R | V | 95.00% | 53  |                                              | 538.5365  | 4 | 3.1  | 1196 | 1214 | Yes |
| KKMEGDLNEMEIQLSHANR    | K | M | 95.00% | 48  | M10: Oxidation                               | 565.5286  | 4 | 2.1  | 1618 | 1636 | Yes |
| KKMEGDLNEMEIQLSHANR    | K | M | 95.00% | 54  | M3: Oxidation                                | 753.7057  | 3 | 6.7  | 1618 | 1636 | Yes |
| KKMEGDLNEMEIQLSHANR    | K | M | 95.00% | 42  | M3: Oxidation                                | 565.5287  | 4 | 2.2  | 1618 | 1636 | Yes |
| KKMEGDLNEMEIQLSHANR    | K | M | 95.00% | 60  | M3: Oxidation                                | 759.0351  | 3 | 3.6  | 1618 | 1636 | Yes |
| KKMEGDLNEMEIQLSHANR    | K | M | 95.00% | 69  | M3: Oxidation                                | 569.5274  | 4 | 2.1  | 1618 | 1636 | Yes |
| KKMEGDLNEMEIQLSHANR    | K | M | 95.00% | 60  | M3: Oxidation, M10: Oxidation, M3: Oxidation | 759.0351  | 3 | 3.6  | 1618 | 1636 | Yes |
| KKMEGDLNEMEIQLSHANR    | K | M | 95.00% | 69  | M10: Oxidation                               | 569.5274  | 4 | 2.1  | 1618 | 1636 | Yes |
| KKMEGDLNEMEIQLSHANR    | K | M | 95.00% | 61  |                                              | 748.3721  | 3 | 4.1  | 1618 | 1636 | Yes |
| KKMEGDLNEMEIQLSHANR    | K | M | 95.00% | 69  |                                              | 561.5313  | 4 | 4.5  | 1618 | 1636 | Yes |
| KLAEQELIETSER          | R | V | 95.00% | 113 |                                              | 773.4159  | 2 | 7.4  | 1702 | 1714 | Yes |
| KLAEQELIETSER          | R | V | 95.00% | 66  |                                              | 515.9439  | 3 | 2.1  | 1702 | 1714 | Yes |
| KLEGDLK                | R | L | 95.00% | 39  |                                              | 401.7396  | 2 | 4.6  | 1056 | 1062 | Yes |
| KMEGDLNEMEIQLSHANR     | K | M | 95.00% | 83  | M2: Oxidation                                | 711.0037  | 3 | 2.1  | 1619 | 1636 | Yes |
| KMEGDLNEMEIQLSHANR     | K | M | 95.00% | 49  | M2: Oxidation                                | 533.5064  | 4 | 5.2  | 1619 | 1636 | Yes |
| KMEGDLNEMEIQLSHANR     | K | M | 95.00% | 90  | M2: Oxidation                                | 1074.0030 | 2 | 6.0  | 1619 | 1636 | Yes |
| KMEGDLNEMEIQLSHANR     | K | M | 95.00% | 58  | M2: Oxidation                                | 716.3366  | 3 | 3.8  | 1619 | 1636 | Yes |
| KMEGDLNEMEIQLSHANR     | K | M | 95.00% | 46  | M2: Oxidation                                | 537.5038  | 4 | 2.6  | 1619 | 1636 | Yes |
| KMEGDLNEMEIQLSHANR     | K | M | 95.00% | 90  | M2: Oxidation, M9: Oxidation                 | 1074.0030 | 2 | 6.0  | 1619 | 1636 | Yes |
| KMEGDLNEMEIQLSHANR     | K | M | 95.00% | 58  | M2: Oxidation, M9: Oxidation                 | 716.3366  | 3 | 3.8  | 1619 | 1636 | Yes |
| KMEGDLNEMEIQLSHANR     | K | M | 95.00% | 46  | M2: Oxidation, M9: Oxidation                 | 537.5038  | 4 | 2.6  | 1619 | 1636 | Yes |
| KMEGDLNEMEIQLSHANR     | K | M | 95.00% | 52  | M9: Oxidation                                | 711.0025  | 3 | 0.3  | 1619 | 1636 | Yes |
| KMEGDLNEMEIQLSHANR     | K | M | 95.00% | 37  | M9: Oxidation                                | 533.5066  | 4 | 5.5  | 1619 | 1636 | Yes |
| KMEGDLNEMEIQLSHANR     | K | M | 95.00% | 107 |                                              | 1058.0130 | 2 | 9.9  | 1619 | 1636 | Yes |
| KMEGDLNEMEIQLSHANR     | K | M | 95.00% | 87  |                                              | 705.6741  | 3 | 4.8  | 1619 | 1636 | Yes |
| KMEGDLNEMEIQLSHANR     | K | M | 95.00% | 46  |                                              | 529.5076  | 4 | 5.0  | 1619 | 1636 | Yes |
| KVQHELDEAEER           | R | A | 95.00% | 60  |                                              | 741.8669  | 2 | 4.8  | 1900 | 1911 | Yes |
| KVQHELDEAEER           | R | A | 95.00% | 62  |                                              | 494.9157  | 3 | 8.4  | 1900 | 1911 | Yes |
| KVQHELDEAEERADIAESQVNK | R | L | 95.00% | 97  |                                              | 1269.6380 | 2 | 9.4  | 1900 | 1921 | Yes |
| KVQHELDEAEERADIAESQVNK | R | L | 95.00% | 58  |                                              | 846.7584  | 3 | 6.3  | 1900 | 1921 | Yes |
| KVQHELDEAEERADIAESQVNK | R | L | 95.00% | 67  |                                              | 635.3188  | 4 | 3.2  | 1900 | 1921 | Yes |
| LAEKDEEMEQAKR          | K | N | 95.00% | 50  | M8: Oxidation                                | 531.5968  | 3 | 9.8  | 1578 | 1590 | Yes |
| LAEKDEEMEQAKR          | K | N | 95.00% | 46  |                                              | 526.2601  | 3 | 0.3  | 1578 | 1590 | Yes |
| LAEQELIETSER           | K | V | 95.00% | 115 |                                              | 709.3655  | 2 | 3.9  | 1703 | 1714 | Yes |
| LAEQELIETSER           | K | V | 95.00% | 40  |                                              | 473.2461  | 3 | 3.4  | 1703 | 1714 | Yes |
| LASADIETYLLEK          | K | S | 95.00% | 129 |                                              | 733.3926  | 2 | -1.2 | 259  | 271  | Yes |
| LASADIETYLLEK          | K | S | 95.00% | 66  |                                              | 489.2671  | 3 | 4.5  | 259  | 271  | Yes |
| LDEAEQIALK             | R | G | 95.00% | 50  |                                              | 1129.6190 | 1 | 7.2  | 1799 | 1808 | Yes |
| LDEAEQIALK             | R | G | 95.00% | 97  |                                              | 565.3107  | 2 | 2.5  | 1799 | 1808 | Yes |
| LDEAEQIALKGGK          | R | K | 95.00% | 66  |                                              | 686.3813  | 2 | 4.5  | 1799 | 1811 | Yes |
| LDEAEQIALKGGK          | R | K | 95.00% | 42  |                                              | 457.9226  | 3 | 2.6  | 1799 | 1811 | Yes |

|                    |   |   |        |     |                              |           |   |     |      |      |     |
|--------------------|---|---|--------|-----|------------------------------|-----------|---|-----|------|------|-----|
| LDEAEQIALKGGKK     | R | Q | 95.00% | 81  |                              | 750.4314  | 2 | 7.6 | 1799 | 1812 | Yes |
| LDEAEQIALKGGKK     | R | Q | 95.00% | 45  |                              | 500.6212  | 3 | 2.9 | 1799 | 1812 | Yes |
| LEDEEEMNAELTAK     | R | K | 95.00% | 117 | M7: Oxidation                | 819.3672  | 2 | 2.9 | 928  | 941  | Yes |
| LEDEEEMNAELTAK     | R | K | 95.00% | 124 |                              | 811.3694  | 2 | 2.5 | 928  | 941  | Yes |
| LEEAGGATSVQIEMNK   | R | K | 95.00% | 146 | M14: Oxidation               | 846.9111  | 2 | 1.7 | 1152 | 1167 | Yes |
| LEEAGGATSVQIEMNK   | R | K | 95.00% | 50  | M14: Oxidation               | 564.9460  | 3 | 6.3 | 1152 | 1167 | Yes |
| LEEAGGATSVQIEMNK   | R | K | 95.00% | 132 |                              | 838.9142  | 2 | 2.4 | 1152 | 1167 | Yes |
| LEEAGGATSVQIEMNKK  | R | R | 95.00% | 71  | M14: Oxidation               | 910.9600  | 2 | 3.2 | 1152 | 1168 | Yes |
| LELDDVTSNMEQIIK    | K | A | 95.00% | 103 | M10: Oxidation               | 882.4482  | 2 | 8.2 | 1228 | 1242 | Yes |
| LELDDVTSNMEQIIK    | K | A | 95.00% | 97  |                              | 874.4501  | 2 | 7.5 | 1228 | 1242 | Yes |
| LELDDVTSNMEQIIK    | K | A | 95.00% | 72  |                              | 583.3007  | 3 | 4.2 | 1228 | 1242 | Yes |
| LEQQVDDLEGSLEQEK   | K | K | 95.00% | 144 |                              | 930.4526  | 2 | 5.2 | 1029 | 1044 | Yes |
| LEQQVDDLEGSLEQEK   | K | K | 95.00% | 113 |                              | 620.6381  | 3 | 5.9 | 1029 | 1044 | Yes |
| LEQQVDDLEGSLEQEKK  | K | V | 95.00% | 116 |                              | 994.5015  | 2 | 6.3 | 1029 | 1045 | Yes |
| LEQQVDDLEGSLEQEKK  | K | V | 95.00% | 69  |                              | 663.3355  | 3 | 4.1 | 1029 | 1045 | Yes |
| LKNAYEESLEHLETFK   | K | R | 95.00% | 133 |                              | 976.0031  | 2 | 8.7 | 1486 | 1501 | Yes |
| LKNAYEESLEHLETFK   | K | R | 95.00% | 75  |                              | 651.0009  | 3 | 2.9 | 1486 | 1501 | Yes |
| LKNAYEESLEHLETFK   | K | R | 95.00% | 45  |                              | 488.5031  | 4 | 3.9 | 1486 | 1501 | Yes |
| LKNAYEESLEHLETFKR  | K | E | 95.00% | 113 |                              | 1054.0520 | 2 | 6.0 | 1486 | 1502 | Yes |
| LKNAYEESLEHLETFKR  | K | E | 95.00% | 59  |                              | 703.0364  | 3 | 5.3 | 1486 | 1502 | Yes |
| LKNAYEESLEHLETFKR  | K | E | 95.00% | 53  |                              | 527.5279  | 4 | 2.8 | 1486 | 1502 | Yes |
| LLSSLDIDHNQYK      | K | F | 95.00% | 105 |                              | 773.4031  | 2 | 4.5 | 747  | 759  | Yes |
| LLSSLDIDHNQYK      | K | F | 95.00% | 34  |                              | 515.9373  | 3 | 3.2 | 747  | 759  | Yes |
| LODLVDK            | R | L | 95.00% | 35  |                              | 830.4664  | 1 | 4.6 | 1866 | 1872 | Yes |
| LODLVDK            | R | L | 95.00% | 32  |                              | 415.7358  | 2 | 1.5 | 1866 | 1872 | Yes |
| LODLVDKLQLK        | R | V | 95.00% | 85  |                              | 656.8982  | 2 | 3.2 | 1866 | 1876 | Yes |
| LODLVDKLQLK        | R | V | 95.00% | 64  |                              | 438.2683  | 3 | 3.7 | 1866 | 1876 | Yes |
| LQNEIEDLMVDVER     | R | S | 95.00% | 122 | M9: Oxidation                | 859.9222  | 2 | 5.5 | 1423 | 1436 | Yes |
| LQNEIEDLMVDVER     | R | S | 95.00% | 74  | M9: Oxidation                | 573.6172  | 3 | 5.3 | 1423 | 1436 | Yes |
| LQNEIEDLMVDVER     | R | S | 95.00% | 109 |                              | 851.9232  | 2 | 3.7 | 1423 | 1436 | Yes |
| LQNEIEDLMVDVER     | R | S | 95.00% | 79  |                              | 568.2845  | 3 | 3.2 | 1423 | 1436 | Yes |
| LQQFFNHMFVLEQEEYK  | K | K | 95.00% | 58  | M9: Oxidation                | 795.0480  | 3 | 4.4 | 486  | 503  | Yes |
| LQQFFNHMFVLEQEEYK  | K | K | 95.00% | 35  | M9: Oxidation                | 596.5412  | 4 | 9.8 | 486  | 503  | Yes |
| LQQFFNHMFVLEQEEYK  | K | K | 95.00% | 43  |                              | 789.7178  | 3 | 6.2 | 486  | 503  | Yes |
| LQQFFNHMFVLEQEEYK  | K | K | 95.00% | 42  |                              | 592.5402  | 4 | 6.1 | 486  | 503  | Yes |
| LQQFFNHMFVLEQEEYKK | K | E | 95.00% | 48  | M9: Oxidation                | 837.7477  | 3 | 5.8 | 486  | 504  | Yes |
| LQQFFNHMFVLEQEEYKK | K | E | 95.00% | 103 |                              | 1248.1230 | 2 | 8.3 | 486  | 504  | Yes |
| LQQFFNHMFVLEQEEYKK | K | E | 95.00% | 57  |                              | 832.4158  | 3 | 5.6 | 486  | 504  | Yes |
| LQQFFNHMFVLEQEEYKK | K | E | 95.00% | 42  |                              | 499.8525  | 5 | 5.4 | 486  | 504  | Yes |
| LTGAIMHYGNMK       | K | F | 95.00% | 42  | M11: Oxidation               | 676.3345  | 2 | 7.9 | 353  | 364  | No  |
| LTGAIMHYGNMK       | K | F | 95.00% | 47  |                              | 668.3338  | 2 | 3.2 | 353  | 364  | No  |
| LTQESIMDLENDK      | K | L | 95.00% | 86  | M7: Oxidation                | 776.3684  | 2 | 4.9 | 1063 | 1075 | No  |
| LTQESIMDLENDK      | K | L | 95.00% | 58  |                              | 768.3713  | 2 | 5.4 | 1063 | 1075 | No  |
| MEGDLNEMEIQLSHANR  | K | M | 95.00% | 106 | M1: Oxidation                | 1001.9560 | 2 | 4.1 | 1620 | 1636 | Yes |
| MEGDLNEMEIQLSHANR  | K | M | 95.00% | 68  | M1: Oxidation                | 668.3069  | 3 | 4.4 | 1620 | 1636 | Yes |
| MEGDLNEMEIQLSHANR  | K | M | 95.00% | 88  | M1: Oxidation                | 1009.9510 | 2 | 1.6 | 1620 | 1636 | Yes |
| MEGDLNEMEIQLSHANR  | K | M | 95.00% | 68  | M1: Oxidation                | 673.6376  | 3 | 3.0 | 1620 | 1636 | Yes |
| MEGDLNEMEIQLSHANR  | K | M | 95.00% | 88  | M1: Oxidation, M8: Oxidation | 1009.9510 | 2 | 1.6 | 1620 | 1636 | Yes |
| MEGDLNEMEIQLSHANR  | K | M | 95.00% | 68  | M1: Oxidation, M8: Oxidation | 673.6376  | 3 | 3.0 | 1620 | 1636 | Yes |
| MEGDLNEMEIQLSHANR  | K | M | 95.00% | 83  | M8: Oxidation                | 1001.9580 | 2 | 6.4 | 1620 | 1636 | Yes |
| MEGDLNEMEIQLSHANR  | K | M | 95.00% | 45  | M8: Oxidation                | 668.3068  | 3 | 4.3 | 1620 | 1636 | Yes |
| MEGDLNEMEIQLSHANR  | K | M | 95.00% | 148 |                              | 993.9626  | 2 | 8.0 | 1620 | 1636 | Yes |
| MEGDLNEMEIQLSHANR  | K | M | 95.00% | 83  |                              | 662.9764  | 3 | 6.1 | 1620 | 1636 | Yes |
| MFNWMVTR           | K | I | 95.00% | 47  | M1: Oxidation                | 550.7566  | 2 | 3.1 | 436  | 443  | No  |
| MFNWMVTR           | K | I | 95.00% | 56  | M1: Oxidation                | 558.7542  | 2 | 3.2 | 436  | 443  | No  |
| MFNWMVTR           | K | I | 95.00% | 56  | M1: Oxidation, M5: Oxidation | 558.7542  | 2 | 3.2 | 436  | 443  | No  |
| MFNWMVTR           | K | I | 95.00% | 54  | M5: Oxidation                | 550.7580  | 2 | 5.5 | 436  | 443  | No  |
| MFNWMVTR           | K | I | 95.00% | 35  |                              | 1084.5120 | 1 | 4.2 | 436  | 443  | No  |
| MFNWMVTR           | K | I | 95.00% | 52  |                              | 542.7602  | 2 | 5.1 | 436  | 443  | No  |
| MVSLLOEK           | K | N | 95.00% | 53  | M1: Oxidation                | 963.5215  | 1 | 3.1 | 879  | 886  | Yes |
| MVSLLOEK           | K | N | 95.00% | 53  | M1: Oxidation                | 482.2638  | 2 | 1.3 | 879  | 886  | Yes |
| MVSLLOEK           | K | N | 95.00% | 48  |                              | 947.5253  | 1 | 1.7 | 879  | 886  | Yes |
| MVSLLOEK           | K | N | 95.00% | 55  |                              | 474.2693  | 2 | 7.7 | 879  | 886  | Yes |
| NALAHALQSAR        | K | H | 95.00% | 47  |                              | 1151.6330 | 1 | 4.3 | 1329 | 1339 | Yes |
| NALAHALQSAR        | K | H | 95.00% | 80  |                              | 576.3195  | 2 | 2.2 | 1329 | 1339 | Yes |
| NAYEESLEHLETFK     | K | R | 95.00% | 112 |                              | 855.4108  | 2 | 6.8 | 1488 | 1501 | Yes |
| NAYEESLEHLETFK     | K | R | 95.00% | 47  |                              | 570.6091  | 3 | 5.5 | 1488 | 1501 | Yes |

|                        |   |   |        |     |                                  |           |   |      |      |      |     |
|------------------------|---|---|--------|-----|----------------------------------|-----------|---|------|------|------|-----|
| NAYEESLEHLETFKR        | K | E | 95.00% | 102 |                                  | 933.4626  | 2 | 7.5  | 1488 | 1502 | Yes |
| NAYEESLEHLETFKR        | K | E | 95.00% | 51  |                                  | 622.6431  | 3 | 5.5  | 1488 | 1502 | Yes |
| NFDKILAEWK             | R | Q | 95.00% | 40  |                                  | 632.3444  | 2 | 5.5  | 1450 | 1459 | Yes |
| NFDKILAEWK             | R | Q | 95.00% | 30  |                                  | 421.8982  | 3 | 4.0  | 1450 | 1459 | Yes |
| NLTEEMAGLDEIIAK        | K | L | 95.00% | 114 | M6: Oxidation                    | 831.9211  | 2 | 4.9  | 979  | 993  | Yes |
| NLTEEMAGLDEIIAK        | K | L | 95.00% | 71  | M6: Oxidation                    | 554.9494  | 3 | 3.8  | 979  | 993  | Yes |
| NLTEEMAGLDEIIAK        | K | L | 95.00% | 117 |                                  | 823.9225  | 2 | 3.6  | 979  | 993  | Yes |
| NLTEEMAGLDEIIAK        | K | L | 95.00% | 84  |                                  | 549.6174  | 3 | 3.1  | 979  | 993  | Yes |
| NMEQTIK                | K | D | 95.00% | 32  | M2: Oxidation                    | 440.2186  | 2 | 5.4  | 1787 | 1793 | Yes |
| NMEQTIKDLQHR           | K | L | 95.00% | 39  | M2: Oxidation                    | 764.8834  | 2 | 3.0  | 1787 | 1798 | Yes |
| NNLLQAELEELR           | R | A | 95.00% | 115 |                                  | 721.3893  | 2 | 3.9  | 1680 | 1691 | Yes |
| NNLLQAELEELR           | R | A | 95.00% | 96  |                                  | 481.2624  | 3 | 4.5  | 1680 | 1691 | Yes |
| NNLLQAELEELRAVVEQTER   | R | S | 95.00% | 72  |                                  | 785.4218  | 3 | 7.7  | 1680 | 1699 | Yes |
| NWPWMK                 | K | L | 95.00% | 29  |                                  | 431.2093  | 2 | 3.1  | 828  | 833  | Yes |
| QAEAEQANTNLSK          | R | F | 95.00% | 109 |                                  | 831.3884  | 2 | 4.3  | 1883 | 1897 | Yes |
| QAEAEQANTNLSK          | R | F | 95.00% | 64  |                                  | 554.5937  | 3 | 2.1  | 1883 | 1897 | Yes |
| QKYEESQSELESSQK        | K | E | 95.00% | 99  |                                  | 900.4216  | 2 | 3.0  | 1460 | 1474 | Yes |
| QKYEESQSELESSQK        | K | E | 95.00% | 59  |                                  | 600.6168  | 3 | 2.6  | 1460 | 1474 | Yes |
| RDLEEATLQHEATAAALR     | R | K | 95.00% | 119 |                                  | 998.0237  | 2 | 6.8  | 1178 | 1195 | Yes |
| RDLEEATLQHEATAAALR     | R | K | 95.00% | 84  |                                  | 665.6832  | 3 | 3.9  | 1178 | 1195 | Yes |
| RDLEEATLQHEATAAALR     | R | K | 95.00% | 65  |                                  | 499.5138  | 4 | 2.9  | 1178 | 1195 | Yes |
| RNNLLQAELEELR          | R | A | 95.00% | 81  |                                  | 799.4423  | 2 | 6.6  | 1679 | 1691 | Yes |
| RNNLLQAELEELR          | R | A | 95.00% | 88  |                                  | 533.2958  | 3 | 3.4  | 1679 | 1691 | Yes |
| RQAEAEQANTNLSK         | K | F | 95.00% | 66  |                                  | 909.4342  | 2 | -1.3 | 1882 | 1897 | Yes |
| RQAEAEQANTNLSK         | K | F | 95.00% | 46  |                                  | 606.6284  | 3 | 3.6  | 1882 | 1897 | Yes |
| RSEAPPHIFSISDNAYQMLTDR | K | E | 95.00% | 118 | M19: Oxidation                   | 909.7731  | 3 | 7.4  | 147  | 169  | Yes |
| RSEAPPHIFSISDNAYQMLTDR | K | E | 95.00% | 50  | M19: Oxidation                   | 682.5812  | 4 | 6.5  | 147  | 169  | Yes |
| RSEAPPHIFSISDNAYQMLTDR | K | E | 95.00% | 125 |                                  | 904.4421  | 3 | 8.1  | 147  | 169  | Yes |
| RSEAPPHIFSISDNAYQMLTDR | K | E | 95.00% | 45  |                                  | 678.5836  | 4 | 8.3  | 147  | 169  | Yes |
| RSEAPPHIFSISDNAYQMLTDR | K | E | 95.00% | 56  | M19: Oxidation                   | 1053.7730 | 4 | 8.6  | 147  | 184  | Yes |
| ENQSILITGESGAGK        | K | T | 95.00% | 77  |                                  | 1049.7750 | 4 | 9.3  | 147  | 184  | Yes |
| SAETEKEMATMK           | K | E | 95.00% | 40  | M11: Oxidation                   | 686.3135  | 2 | 4.0  | 844  | 855  | Yes |
| SAETEKEMATMK           | K | E | 95.00% | 34  | M11: Oxidation<br>M8: Oxidation, | 457.8794  | 3 | 6.5  | 844  | 855  | Yes |
| SAETEKEMATMK           | K | E | 95.00% | 37  | M11: Oxidation                   | 694.3143  | 2 | 8.8  | 844  | 855  | Yes |
| SAETEKEMATMK           | K | E | 95.00% | 68  |                                  | 678.3158  | 2 | 3.6  | 844  | 855  | Yes |
| SAETEKEMATMK           | K | E | 95.00% | 41  |                                  | 452.5479  | 3 | 6.8  | 844  | 855  | Yes |
| SAYLMGLNSADLLK         | K | G | 95.00% | 89  | M5: Oxidation                    | 756.3945  | 2 | 2.0  | 385  | 398  | Yes |
| SAYLMGLNSADLLK         | K | G | 95.00% | 88  |                                  | 748.3988  | 2 | 4.4  | 385  | 398  | Yes |
| SEAPPHIFSISDNAYQMLTDR  | R | E | 95.00% | 84  | M18: Oxidation                   | 857.7385  | 3 | 6.8  | 148  | 169  | Yes |
| SEAPPHIFSISDNAYQMLTDR  | R | E | 95.00% | 78  |                                  | 852.4084  | 3 | 8.7  | 148  | 169  | Yes |
| SEAPPHIFSISDNAYQMLTDR  | R | E | 95.00% | 37  | M18: Oxidation                   | 1014.7450 | 4 | 6.5  | 148  | 184  | Yes |
| SEFKLELDDVTSNMEQIIK    | K | A | 95.00% | 113 | M14: Oxidation                   | 1128.0600 | 2 | 0.4  | 1224 | 1242 | Yes |
| SEFKLELDDVTSNMEQIIK    | K | A | 95.00% | 57  | M14: Oxidation                   | 752.3806  | 3 | 6.4  | 1224 | 1242 | Yes |
| SEFKLELDDVTSNMEQIIK    | K | A | 95.00% | 146 |                                  | 1120.0710 | 2 | 7.3  | 1224 | 1242 | Yes |
| SEFKLELDDVTSNMEQIIK    | K | A | 95.00% | 61  |                                  | 747.0488  | 3 | 6.1  | 1224 | 1242 | Yes |
| SLQSLKDTQIQLDDAVR      | K | A | 95.00% | 54  |                                  | 681.7121  | 3 | 5.8  | 1647 | 1664 | Yes |
| SLSTELFK               | R | L | 95.00% | 34  |                                  | 924.5075  | 1 | 3.4  | 1478 | 1485 | Yes |
| SLSTELFK               | R | L | 95.00% | 65  |                                  | 462.7582  | 2 | 4.7  | 1478 | 1485 | Yes |
| SNAAAAALDK             | R | K | 95.00% | 32  |                                  | 466.2507  | 2 | 9.4  | 1437 | 1446 | Yes |
| SNAAAAALDKK            | R | Q | 95.00% | 81  |                                  | 530.2949  | 2 | 2.0  | 1437 | 1447 | Yes |
| SRVIFOLK               | K | A | 95.00% | 30  |                                  | 495.8115  | 2 | 5.2  | 272  | 279  | Yes |
| TEELEEK                | R | K | 95.00% | 33  |                                  | 948.4558  | 1 | 3.3  | 1385 | 1392 | Yes |
| TEELEEK                | R | K | 95.00% | 37  |                                  | 474.7331  | 2 | 6.0  | 1385 | 1392 | Yes |
| TEELEEK                | R | K | 95.00% | 40  |                                  | 538.7797  | 2 | 3.5  | 1385 | 1393 | Yes |
| TKYETDAIQR             | R | T | 95.00% | 69  |                                  | 612.8171  | 2 | 3.2  | 1375 | 1384 | Yes |
| TKYETDAIQR             | R | T | 95.00% | 48  |                                  | 408.8806  | 3 | 3.0  | 1375 | 1384 | Yes |
| TKYETDAIQRTEELEEK      | R | K | 95.00% | 74  |                                  | 1077.5420 | 2 | 8.6  | 1375 | 1392 | Yes |
| TKYETDAIQRTEELEEK      | R | K | 95.00% | 38  |                                  | 718.6949  | 3 | 5.7  | 1375 | 1392 | Yes |
| TKYETDAIQRTEELEEK      | R | K | 95.00% | 31  |                                  | 539.2729  | 4 | 5.3  | 1375 | 1392 | Yes |
| VGNEYVTK               | K | G | 95.00% | 69  |                                  | 455.2391  | 2 | 2.3  | 407  | 414  | Yes |
| VIFOLK                 | R | A | 95.00% | 31  |                                  | 747.4807  | 1 | 5.0  | 274  | 279  | Yes |

|     |                                       |       |                                                           |                                                                                                                                                                            |   |   |        |     |                                   |           |   |     |      |      |     |
|-----|---------------------------------------|-------|-----------------------------------------------------------|----------------------------------------------------------------------------------------------------------------------------------------------------------------------------|---|---|--------|-----|-----------------------------------|-----------|---|-----|------|------|-----|
|     |                                       |       |                                                           | VKEMNERLEDEEEMNAELTAK                                                                                                                                                      | K | K | 95.00% | 69  | M14: Oxidation                    | 842.0610  | 3 | 5.1 | 921  | 941  | Yes |
|     |                                       |       |                                                           | VKEMNERLEDEEEMNAELTAK                                                                                                                                                      | K | K | 95.00% | 40  | M14: Oxidation                    | 631.7974  | 4 | 4.5 | 921  | 941  | Yes |
|     |                                       |       |                                                           | VKEMNERLEDEEEMNAELTAK                                                                                                                                                      | K | K | 95.00% | 63  | M4: Oxidation                     | 842.0579  | 3 | 1.5 | 921  | 941  | Yes |
|     |                                       |       |                                                           | VKEMNERLEDEEEMNAELTAK                                                                                                                                                      | K | K | 95.00% | 37  | M4: Oxidation                     | 635.7957  | 4 | 3.9 | 921  | 941  | Yes |
|     |                                       |       |                                                           | VKEMNERLEDEEEMNAELTAK                                                                                                                                                      | K | K | 95.00% | 50  | M4: Oxidation,<br>M14: Oxidation  | 847.3940  | 3 | 6.7 | 921  | 941  | Yes |
|     |                                       |       |                                                           | VKEMNERLEDEEEMNAELTAK                                                                                                                                                      | K | K | 95.00% | 37  | M14: Oxidation                    | 635.7957  | 4 | 3.9 | 921  | 941  | Yes |
|     |                                       |       |                                                           | VKEMNERLEDEEEMNAELTAK                                                                                                                                                      | K | K | 95.00% | 57  |                                   | 836.7292  | 3 | 5.0 | 921  | 941  | Yes |
|     |                                       |       |                                                           | VKLEQQVDDLEGSLEQEK                                                                                                                                                         | K | K | 95.00% | 157 |                                   | 1044.0380 | 2 | 8.1 | 1027 | 1044 | Yes |
|     |                                       |       |                                                           | VKLEQQVDDLEGSLEQEK                                                                                                                                                         | K | K | 95.00% | 68  |                                   | 696.3594  | 3 | 5.5 | 1027 | 1044 | Yes |
|     |                                       |       |                                                           | VKLEQQVDDLEGSLEQEK                                                                                                                                                         | K | V | 95.00% | 136 |                                   | 1108.0860 | 2 | 8.3 | 1027 | 1045 | Yes |
|     |                                       |       |                                                           | VKLEQQVDDLEGSLEQEK                                                                                                                                                         | K | V | 95.00% | 87  |                                   | 739.0583  | 3 | 6.1 | 1027 | 1045 | Yes |
|     |                                       |       |                                                           | VKLEQQVDDLEGSLEQEK                                                                                                                                                         | K | V | 95.00% | 47  |                                   | 554.5450  | 4 | 4.7 | 1027 | 1045 | Yes |
|     |                                       |       |                                                           | VKNLTEEMAGLDEIIAK                                                                                                                                                          | K | L | 95.00% | 77  | M8: Oxidation                     | 945.5076  | 2 | 9.3 | 977  | 993  | Yes |
|     |                                       |       |                                                           | VKNLTEEMAGLDEIIAK                                                                                                                                                          | K | L | 95.00% | 32  | M8: Oxidation                     | 630.6721  | 3 | 5.7 | 977  | 993  | Yes |
|     |                                       |       |                                                           | VKNLTEEMAGLDEIIAK                                                                                                                                                          | K | L | 95.00% | 121 |                                   | 937.5083  | 2 | 7.4 | 977  | 993  | Yes |
|     |                                       |       |                                                           | VKNLTEEMAGLDEIIAK                                                                                                                                                          | K | L | 95.00% | 54  |                                   | 625.3402  | 3 | 5.4 | 977  | 993  | Yes |
|     |                                       |       |                                                           | VKVGNEYVTK                                                                                                                                                                 | R | G | 95.00% | 59  |                                   | 568.8224  | 2 | 4.7 | 405  | 414  | Yes |
|     |                                       |       |                                                           | VQHELDEAEER                                                                                                                                                                | K | A | 95.00% | 52  |                                   | 677.8201  | 2 | 6.2 | 1901 | 1911 | Yes |
|     |                                       |       |                                                           | VQHELDEAEER                                                                                                                                                                | K | A | 95.00% | 35  |                                   | 452.2151  | 3 | 4.1 | 1901 | 1911 | Yes |
|     |                                       |       |                                                           | VQHELDEAEERADIAESQVNK                                                                                                                                                      | K | L | 95.00% | 119 |                                   | 1205.5860 | 2 | 6.5 | 1901 | 1921 | Yes |
|     |                                       |       |                                                           | VQHELDEAEERADIAESQVNK                                                                                                                                                      | K | L | 95.00% | 67  |                                   | 804.0601  | 3 | 6.6 | 1901 | 1921 | Yes |
|     |                                       |       |                                                           | VQHELDEAEERADIAESQVNK                                                                                                                                                      | K | L | 95.00% | 61  |                                   | 603.2958  | 4 | 4.6 | 1901 | 1921 | Yes |
|     |                                       |       |                                                           | VQLLHSQNTSLINQK                                                                                                                                                            | R | K | 95.00% | 119 |                                   | 861.9822  | 2 | 3.7 | 1715 | 1729 | Yes |
|     |                                       |       |                                                           | VQLLHSQNTSLINQK                                                                                                                                                            | R | K | 95.00% | 59  |                                   | 574.9913  | 3 | 4.7 | 1715 | 1729 | Yes |
|     |                                       |       |                                                           | VQLLHSQNTSLINQK                                                                                                                                                            | R | K | 95.00% | 37  |                                   | 617.6885  | 3 | 2.4 | 1715 | 1730 | Yes |
|     |                                       |       |                                                           | VVDSLQTSLSAETR                                                                                                                                                             | R | S | 95.00% | 138 |                                   | 767.3948  | 2 | 3.7 | 1595 | 1608 | Yes |
|     |                                       |       |                                                           | VVDSLQTSLSAETR                                                                                                                                                             | R | S | 95.00% | 72  |                                   | 511.9321  | 3 | 2.9 | 1595 | 1608 | Yes |
|     |                                       |       |                                                           | YEESQSELESSQK                                                                                                                                                              | K | E | 95.00% | 109 |                                   | 772.3451  | 2 | 3.9 | 1462 | 1474 | Yes |
|     |                                       |       |                                                           | YETDAIQR                                                                                                                                                                   | K | T | 95.00% | 31  |                                   | 498.2471  | 2 | 6.5 | 1377 | 1384 | Yes |
| 699 | IPI00302927                           | CCT4  | T-COMPLEX PROTEIN 1 SUBUNIT DELTA.                        | ALIAGGGAPEIELALR                                                                                                                                                           | R | L | 95.00% | 51  |                                   | 775.9566  | 2 | 9.3 | 420  | 435  | No  |
|     |                                       |       |                                                           | AYILNLVK                                                                                                                                                                   | R | Q | 95.00% | 30  |                                   | 467.2939  | 2 | 2.7 | 281  | 288  | No  |
|     |                                       |       |                                                           | DALSDLALHFLNK                                                                                                                                                              | R | M | 95.00% | 93  |                                   | 728.8993  | 2 | 7.3 | 307  | 319  | No  |
|     |                                       |       |                                                           | DALSDLALHFLNK                                                                                                                                                              | R | M | 95.00% | 46  |                                   | 486.2662  | 3 | 2.0 | 307  | 319  | No  |
|     |                                       |       |                                                           | ETLLNSATTSLNSK                                                                                                                                                             | R | V | 95.00% | 85  |                                   | 739.8932  | 2 | 5.6 | 161  | 174  | No  |
|     |                                       |       |                                                           | GDVTITNDGATILK                                                                                                                                                             | K | Q | 95.00% | 75  |                                   | 709.3838  | 2 | 4.0 | 66   | 79   | No  |
|     |                                       |       |                                                           | GIHPTIISSEFOK                                                                                                                                                              | K | A | 95.00% | 51  |                                   | 728.8967  | 2 | 3.7 | 127  | 139  | No  |
|     |                                       |       |                                                           | GIHPTIISSEFOK                                                                                                                                                              | K | A | 95.00% | 30  |                                   | 486.2674  | 3 | 4.4 | 127  | 139  | No  |
|     |                                       |       |                                                           | MIQDGKGDVTITNDGATILK                                                                                                                                                       | K | Q | 95.00% | 63  | M1: Oxidation                     | 702.6992  | 3 | 3.0 | 60   | 79   | No  |
|     |                                       |       |                                                           | VIDPATATSVDLR                                                                                                                                                              | K | D | 95.00% | 86  |                                   | 679.3734  | 2 | 4.4 | 194  | 206  | No  |
|     |                                       |       |                                                           | VVSQYSSLLSPMSVNAVMK                                                                                                                                                        | K | V | 95.00% | 85  | M12: Oxidation,<br>M18: Oxidation | 1036.5330 | 2 | 8.6 | 175  | 193  | No  |
| 700 | IPI00304273; IPI00784338              | APOA4 | APOLIPOPROTEIN A-IV PRECURSOR.; SIMILAR TO APOA4 PROTEIN. | ALVQQMEQLR                                                                                                                                                                 | K | Q | 95.00% | 71  |                                   | 608.3315  | 2 | 2.6 | 317  | 326  | No  |
|     |                                       |       |                                                           | DKVNSFFSTFK                                                                                                                                                                | R | E | 95.00% | 49  |                                   | 660.3422  | 2 | 9.9 | 349  | 359  | No  |
|     |                                       |       |                                                           | LGEVNTYAGDLQK                                                                                                                                                              | K | K | 95.00% | 89  |                                   | 704.3623  | 2 | 3.4 | 66   | 78   | No  |
|     |                                       |       |                                                           | LGPHAGDVEGHLSFLEK                                                                                                                                                          | K | D | 95.00% | 59  |                                   | 903.4697  | 2 | 7.0 | 329  | 345  | No  |
|     |                                       |       |                                                           | LGPHAGDVEGHLSFLEK                                                                                                                                                          | K | D | 95.00% | 57  |                                   | 602.6468  | 3 | 3.3 | 329  | 345  | No  |
|     |                                       |       |                                                           | SELTQQLNALFQDK                                                                                                                                                             | K | L | 95.00% | 96  |                                   | 817.9296  | 2 | 7.5 | 52   | 65   | No  |
|     |                                       |       |                                                           | SLAELGGHLDQQVEEFR                                                                                                                                                          | K | R | 95.00% | 56  |                                   | 643.3254  | 3 | 4.7 | 288  | 304  | No  |
|     |                                       |       |                                                           | SLAELGGHLDQQVEEFR                                                                                                                                                          | K | R | 95.00% | 41  |                                   | 695.3616  | 3 | 8.1 | 288  | 305  | No  |
|     |                                       |       |                                                           | SLAPYAQDTQEK                                                                                                                                                               | R | L | 95.00% | 46  |                                   | 675.8366  | 2 | 8.2 | 222  | 233  | No  |
|     |                                       |       |                                                           | ISOCITRATE DEHYDROGENASE [NAD] SUBUNIT BETA, MITOCHONDRIAL PRECURSOR.; ISOFORM A OF ISOCITRATE DEHYDROGENASE [NAD] SUBUNIT BETA, MITOCHONDRIAL PRECURSOR.; 42 KDA PROTEIN. |   |   |        |     |                                   |           |   |     |      |      |     |
| 701 | IPI00304417; IPI00304419; IPI00643978 | IDH3B |                                                           | EQTEGEYSSLEHESAR                                                                                                                                                           | R | G | 95.00% | 85  |                                   | 926.4077  | 2 | 4.4 | 165  | 180  | No  |
|     |                                       |       |                                                           | EQTEGEYSSLEHESAR                                                                                                                                                           | R | G | 95.00% | 39  |                                   | 617.9403  | 3 | 3.1 | 165  | 180  | No  |
|     |                                       |       |                                                           | HLNLEYHSSMIADAVK                                                                                                                                                           | R | K | 95.00% | 81  | M10: Oxidation                    | 922.4601  | 2 | 6.1 | 335  | 350  | No  |
|     |                                       |       |                                                           | HLNLEYHSSMIADAVK                                                                                                                                                           | R | V | 95.00% | 38  | M10: Oxidation                    | 493.7560  | 4 | 2.1 | 335  | 351  | No  |
|     |                                       |       |                                                           | HNNLDLVIIR                                                                                                                                                                 | R | E | 95.00% | 85  |                                   | 603.8541  | 2 | 3.5 | 155  | 164  | No  |
|     |                                       |       |                                                           | HNNLDLVIIR                                                                                                                                                                 | R | E | 95.00% | 35  |                                   | 402.9054  | 3 | 3.7 | 155  | 164  | No  |
|     |                                       |       |                                                           | KLDLFANVVHVK                                                                                                                                                               | R | S | 95.00% | 72  |                                   | 461.6127  | 3 | 4.5 | 135  | 146  | No  |



| Accession     | Protein Name                                                    | Gene  | Start                                                                                                                                                                                                                       | End         | Score  | Length   | Modifications  | Value                                              | Count    | Weight | Score | Count | Weight | Score | Count | Weight |  |        |                |           |          |           |      |      |      |      |    |  |  |   |  |
|---------------|-----------------------------------------------------------------|-------|-----------------------------------------------------------------------------------------------------------------------------------------------------------------------------------------------------------------------------|-------------|--------|----------|----------------|----------------------------------------------------|----------|--------|-------|-------|--------|-------|-------|--------|--|--------|----------------|-----------|----------|-----------|------|------|------|------|----|--|--|---|--|
|               |                                                                 |       |                                                                                                                                                                                                                             |             | 95.00% | 113      | M1: Oxidation, | 901.4151                                           | 2        | 6.8    | 769   | 784   | No     |       |       |        |  |        |                |           |          |           |      |      |      |      |    |  |  |   |  |
|               |                                                                 |       |                                                                                                                                                                                                                             |             |        |          | M13: Oxidation |                                                    |          |        |       |       |        |       |       |        |  |        |                |           |          |           |      |      |      |      |    |  |  |   |  |
|               |                                                                 |       |                                                                                                                                                                                                                             |             | 95.00% | 40       | M9: Oxidation  | 829.0557                                           | 3        | 7.0    | 879   | 899   | No     |       |       |        |  |        |                |           |          |           |      |      |      |      |    |  |  |   |  |
|               |                                                                 |       |                                                                                                                                                                                                                             |             |        |          |                |                                                    |          |        |       |       |        |       |       |        |  |        |                |           |          |           |      |      |      |      |    |  |  |   |  |
| 711           | IPI00337454; IPI00337455; IPI00477427; IPI00641544; IPI00747742 | TNNT3 | ISOFORM 1 OF TROPONIN T, FAST SKELETAL MUSCLE.; TROPONIN T3, SKELETAL, FAST ISOFORM 3.; ISOFORM 2 OF TROPONIN T, FAST SKELETAL MUSCLE.; ISOFORM 3 OF TROPONIN T, FAST SKELETAL MUSCLE.; HYPOTHETICAL PROTEIN DKFZP779M2348. |             |        | 95.00%   | 63             |                                                    | 864.1201 | 3      | 9.8   | 211   | 231    | No    |       |        |  |        |                |           |          |           |      |      |      |      |    |  |  |   |  |
|               |                                                                 |       | AKELWETLHQLKIDKFEFGEK                                                                                                                                                                                                       | K           | L      |          |                |                                                    |          |        |       |       |        |       |       |        |  |        |                |           |          |           |      |      |      |      |    |  |  |   |  |
|               |                                                                 |       | AKELWETLHQLKIDKFEFGEK                                                                                                                                                                                                       | K           | L      |          |                | 95.00%                                             |          |        |       |       |        |       |       |        |  | 30     |                | 648.3402  | 4        | 7.0       | 211  | 231  | No   |      |    |  |  |   |  |
|               |                                                                 |       | ALSSMGANYSSYLAK                                                                                                                                                                                                             | K           | A      |          |                | 95.00%                                             |          |        |       |       |        |       |       |        |  | 114    | M5: Oxidation  | 789.8799  | 2        | 2.9       | 157  | 171  | Yes  |      |    |  |  |   |  |
|               |                                                                 |       | ALSSMGANYSSYLAK                                                                                                                                                                                                             | K           | A      |          |                | 95.00%                                             |          |        |       |       |        |       |       |        |  | 92     |                | 781.8857  | 2        | 7.2       | 157  | 171  | No   |      |    |  |  |   |  |
|               |                                                                 |       | DLMELQALIDSHFEAR                                                                                                                                                                                                            | K           | K      |          |                | 95.00%                                             |          |        |       |       |        |       |       |        |  | 91     | M3: Oxidation  | 952.4731  | 2        | 8.3       | 78   | 93   | No   |      |    |  |  |   |  |
|               |                                                                 |       | DLMELQALIDSHFEAR                                                                                                                                                                                                            | K           | K      |          |                | 95.00%                                             |          |        |       |       |        |       |       |        |  | 57     | M3: Oxidation  | 635.3176  | 3        | 7.7       | 78   | 93   | Yes  |      |    |  |  |   |  |
|               |                                                                 |       | DLMELQALIDSHFEAR                                                                                                                                                                                                            | K           | K      |          |                | 95.00%                                             |          |        |       |       |        |       |       |        |  | 42     |                | 629.9845  | 3        | 5.4       | 78   | 93   | No   |      |    |  |  |   |  |
|               |                                                                 |       | ELWETLHQLKIDKFEFGEK                                                                                                                                                                                                         | K           | L      |          |                | 95.00%                                             |          |        |       |       |        |       |       |        |  | 80     |                | 1196.1040 | 2        | 5.1       | 213  | 231  | No   |      |    |  |  |   |  |
|               |                                                                 |       | ELWETLHQLKIDKFEFGEK                                                                                                                                                                                                         | K           | L      |          |                | 95.00%                                             |          |        |       |       |        |       |       |        |  | 71     |                | 797.7391  | 3        | 5.9       | 213  | 231  | No   |      |    |  |  |   |  |
|               |                                                                 |       | IPEGEKVFDDIQK                                                                                                                                                                                                               | K           | K      |          |                | 95.00%                                             |          |        |       |       |        |       |       |        |  | 103    |                | 816.9144  | 2        | 5.2       | 59   | 72   | Yes  |      |    |  |  |   |  |
|               |                                                                 |       | IPEGEKVFDDIQK                                                                                                                                                                                                               | K           | K      |          |                | 95.00%                                             |          |        |       |       |        |       |       |        |  | 53     |                | 544.9445  | 3        | 3.4       | 59   | 72   | Yes  |      |    |  |  |   |  |
|               |                                                                 |       | IPEGEKVFDDIQK                                                                                                                                                                                                               | K           | R      |          |                | 95.00%                                             |          |        |       |       |        |       |       |        |  | 79     |                | 880.9653  | 2        | 8.7       | 59   | 73   | No   |      |    |  |  |   |  |
|               |                                                                 |       | IPEGEKVFDDIQK                                                                                                                                                                                                               | K           | R      |          |                | 95.00%                                             |          |        |       |       |        |       |       |        |  | 36     |                | 587.6431  | 3        | 3.5       | 59   | 73   | No   |      |    |  |  |   |  |
|               |                                                                 |       | KALSSMGANYSSYLAK                                                                                                                                                                                                            | K           | A      |          |                | 95.00%                                             |          |        |       |       |        |       |       |        |  | 88     | M6: Oxidation  | 853.9310  | 2        | 6.9       | 156  | 171  | No   |      |    |  |  |   |  |
|               |                                                                 |       | KALSSMGANYSSYLAK                                                                                                                                                                                                            | K           | A      |          |                | 95.00%                                             |          |        |       |       |        |       |       |        |  | 44     | M6: Oxidation  | 569.6223  | 3        | 5.3       | 156  | 171  | No   |      |    |  |  |   |  |
|               |                                                                 |       | KEEEEELVALK                                                                                                                                                                                                                 | K           | E      |          |                | 95.00%                                             |          |        |       |       |        |       |       |        |  | 56     |                | 594.3326  | 2        | 4.1       | 95   | 104  | Yes  |      |    |  |  |   |  |
|               |                                                                 |       | KEEEEELVALK                                                                                                                                                                                                                 | R           | E      |          |                | 95.00%                                             |          |        |       |       |        |       |       |        |  | 79     |                | 658.3810  | 2        | 5.0       | 94   | 104  | Yes  |      |    |  |  |   |  |
|               |                                                                 |       | KEEEEELVALK                                                                                                                                                                                                                 | R           | E      |          |                | 95.00%                                             |          |        |       |       |        |       |       |        |  | 51     |                | 439.2556  | 3        | 2.7       | 94   | 104  | Yes  |      |    |  |  |   |  |
|               |                                                                 |       | KPLNIDLHGEDK                                                                                                                                                                                                                | R           | L      |          |                | 95.00%                                             |          |        |       |       |        |       |       |        |  | 65     |                | 689.8745  | 2        | 5.7       | 195  | 206  | Yes  |      |    |  |  |   |  |
|               |                                                                 |       | KPLNIDLHGEDKLR                                                                                                                                                                                                              | R           | D      |          |                | 95.00%                                             |          |        |       |       |        |       |       |        |  | 75     |                | 824.4702  | 2        | 8.5       | 195  | 208  | No   |      |    |  |  |   |  |
|               |                                                                 |       | KPLNIDLHGEDKLR                                                                                                                                                                                                              | R           | D      |          |                | 95.00%                                             |          |        |       |       |        |       |       |        |  | 51     |                | 549.9805  | 3        | 4.4       | 195  | 208  | Yes  |      |    |  |  |   |  |
|               |                                                                 |       | KPLNIDLHGEDKLR                                                                                                                                                                                                              | R           | D      |          |                | 95.00%                                             |          |        |       |       |        |       |       |        |  | 41     |                | 412.7375  | 4        | 4.7       | 195  | 208  | Yes  |      |    |  |  |   |  |
|               |                                                                 |       | QKYDITTLR                                                                                                                                                                                                                   | R           | S      |          |                | 95.00%                                             |          |        |       |       |        |       |       |        |  | 36     |                | 569.3199  | 2        | 4.4       | 235  | 243  | No   |      |    |  |  |   |  |
|               |                                                                 |       | QNKDLMELQALIDSHFEAR                                                                                                                                                                                                         | R           | K      |          |                | 95.00%                                             |          |        |       |       |        |       |       |        |  | 58     | M6: Oxidation  | 758.7186  | 3        | 9.3       | 75   | 93   | No   |      |    |  |  |   |  |
|               |                                                                 |       | QNKDLMELQALIDSHFEAR                                                                                                                                                                                                         | R           | K      |          |                | 95.00%                                             |          |        |       |       |        |       |       |        |  | 41     | M6: Oxidation  | 569.2879  | 4        | 4.1       | 75   | 93   | No   |      |    |  |  |   |  |
| RKPLNIDLHGEDK | R                                                               | L     | 95.00%                                                                                                                                                                                                                      | 57          |        | 767.9272 | 2              | 8.0                                                | 194      | 206    | Yes   |       |        |       |       |        |  |        |                |           |          |           |      |      |      |      |    |  |  |   |  |
| RKPLNIDLHGEDK | R                                                               | L     | 95.00%                                                                                                                                                                                                                      | 39          |        | 512.2853 | 3              | 3.8                                                | 194      | 206    | Yes   |       |        |       |       |        |  |        |                |           |          |           |      |      |      |      |    |  |  |   |  |
| YDITTLR       | K                                                               | S     | 95.00%                                                                                                                                                                                                                      | 41          |        | 441.2411 | 2              | 1.1                                                | 237      | 243    | No    |       |        |       |       |        |  |        |                |           |          |           |      |      |      |      |    |  |  |   |  |
| 712           | IPI00375676                                                     | FTL   | FERRITIN LIGHT POLYPEPTIDE VARIANT.                                                                                                                                                                                         |             |        | 95.00%   | 37             |                                                    | 417.7412 | 2      | 2.3   | 77    | 83     | No    |       |        |  |        |                |           |          |           |      |      |      |      |    |  |  |   |  |
|               |                                                                 |       | ALFQDIK                                                                                                                                                                                                                     | R           | K      |          |                |                                                    |          |        |       |       |        |       |       |        |  |        |                |           |          |           |      |      |      |      |    |  |  |   |  |
|               |                                                                 |       | KLNQALLDLHALGSAR                                                                                                                                                                                                            | K           | T      |          |                | 95.00%                                             |          |        |       |       |        |       |       |        |  | 40     |                | 430.7541  | 4        | 3.4       | 106  | 121  | No   |      |    |  |  |   |  |
| 713           | IPI00394809                                                     | APOOL | APOLIPOPROTEIN O-LIKE PRECURSOR.                                                                                                                                                                                            |             |        | 95.00%   | 42             |                                                    | 608.8281 | 2      | 4.7   | 201   | 212    | No    |       |        |  |        |                |           |          |           |      |      |      |      |    |  |  |   |  |
|               |                                                                 |       | LGSSSEIEVPAK                                                                                                                                                                                                                | K           | T      |          |                |                                                    |          |        |       |       |        |       |       |        |  |        |                |           |          |           |      |      |      |      |    |  |  |   |  |
|               |                                                                 |       |                                                                                                                                                                                                                             |             |        | 60       | M13: Oxidation | 914.4336                                           | 2        | 8.6    | 233   | 249   | No     |       |       |        |  |        |                |           |          |           |      |      |      |      |    |  |  |   |  |
| 714           | IPI00398162; IPI00478974; IPI00745227; IPI00786896              | NRAP  | ISOFORM 2 OF NEBULIN-RELATED-ANCHORING PROTEIN.; ISOFORM 3 OF NEBULIN-RELATED-ANCHORING PROTEIN.; ISOFORM 1 OF NEBULIN-RELATED-ANCHORING PROTEIN.; ISOFORM 4 OF NEBULIN-RELATED-ANCHORING PROTEIN.                          |             |        | 95.00%   | 43             |                                                    | 764.9080 | 2      | 4.6   | 1429  | 1442   | No    |       |        |  |        |                |           |          |           |      |      |      |      |    |  |  |   |  |
|               |                                                                 |       | FTTVVDSPLVHAK                                                                                                                                                                                                               | K           | N      |          |                |                                                    |          |        |       |       |        |       |       |        |  |        |                |           |          |           |      |      |      |      |    |  |  |   |  |
|               |                                                                 |       | GMAGPAIGAEGILTR                                                                                                                                                                                                             | R           | E      |          |                | 95.00%                                             |          |        |       |       |        |       |       |        |  | 71     | M2: Oxidation  | 715.3831  | 2        | 7.6       | 274  | 288  | No   |      |    |  |  |   |  |
|               |                                                                 |       | GSFPAMITPAYQIAK                                                                                                                                                                                                             | K           | R      |          |                | 95.00%                                             |          |        |       |       |        |       |       |        |  | 31     | M6: Oxidation  | 805.9208  | 2        | 5.2       | 239  | 253  | No   |      |    |  |  |   |  |
|               |                                                                 |       | LTIEALPFQAAR                                                                                                                                                                                                                | K           | A      |          |                | 95.00%                                             |          |        |       |       |        |       |       |        |  | 47     |                | 665.3845  | 2        | 6.1       | 1259 | 1270 | No   |      |    |  |  |   |  |
|               |                                                                 |       | NNTFTSVYHTPLNLR                                                                                                                                                                                                             | K           | T      |          |                | 95.00%                                             |          |        |       |       |        |       |       |        |  | 58     |                | 664.0147  | 3        | 7.0       | 61   | 77   | No   |      |    |  |  |   |  |
|               |                                                                 |       | YSSVTDTPQIQAK                                                                                                                                                                                                               | K           | I      |          |                | 95.00%                                             |          |        |       |       |        |       |       |        |  | 52     |                | 768.9045  | 2        | 6.6       | 453  | 466  | No   |      |    |  |  |   |  |
|               |                                                                 |       | 715                                                                                                                                                                                                                         | IPI00398837 | CCDC88 |          |                | COILED-COIL DOMAIN CONTAINING 88.                  |          |        |       |       |        |       |       |        |  | 95.00% | 35             |           | 779.9310 | 2         | -0.8 | 754  | 767  | No   |    |  |  |   |  |
|               |                                                                 |       |                                                                                                                                                                                                                             |             |        |          |                | KLEAQNTEAARLSK                                     |          |        |       |       |        |       |       |        |  |        |                | R         |          |           |      |      |      |      |    |  |  | E |  |
|               |                                                                 |       |                                                                                                                                                                                                                             |             |        |          |                |                                                    |          |        |       |       |        |       |       |        |  |        |                | 32        |          | 1243.6780 | 1    | -9.9 | 1049 | 1058 | No |  |  |   |  |
| 716           | IPI00399007; IPI00426051; IPI00829767                           | IGHG2 | HYPOTHETICAL PROTEIN DKFZP686I04196 (FRAGMENT).; HYPOTHETICAL PROTEIN DKFZP686C15213.; PROTEIN.                                                                                                                             |             |        | 95.00%   | 53             | M4: Oxidation                                      | 426.2194 | 2      | 1.4   | 266   | 272    | Yes   |       |        |  |        |                |           |          |           |      |      |      |      |    |  |  |   |  |
|               |                                                                 |       | DTLMISR                                                                                                                                                                                                                     | K           | T      |          |                |                                                    |          |        |       |       |        |       |       |        |  |        |                |           |          |           |      |      |      |      |    |  |  |   |  |
|               |                                                                 |       | EPQVYTLPPSR                                                                                                                                                                                                                 | R           | E      |          |                | 95.00%                                             |          |        |       |       |        |       |       |        |  | 48     |                | 643.8439  | 2        | 4.3       | 362  | 372  | No   |      |    |  |  |   |  |
|               |                                                                 |       | EPQVYTLPPSREEMTK                                                                                                                                                                                                            | R           | N      |          |                | 95.00%                                             |          |        |       |       |        |       |       |        |  | 76     | M14: Oxidation | 960.9765  | 2        | 3.8       | 362  | 377  | No   |      |    |  |  |   |  |
|               |                                                                 |       | GFYPSDIAVEWESNGQPENNYK                                                                                                                                                                                                      | K           | T      |          |                | 95.00%                                             |          |        |       |       |        |       |       |        |  | 81     |                | 1272.5700 | 2        | 0.0       | 388  | 409  | Yes  |      |    |  |  |   |  |
|               |                                                                 |       | GFYPSDIAVEWESNGQPENNYK                                                                                                                                                                                                      | K           | T      |          |                | 95.00%                                             |          |        |       |       |        |       |       |        |  | 36     |                | 848.7162  | 3        | 0.5       | 388  | 409  | Yes  |      |    |  |  |   |  |
|               |                                                                 |       | GLPAPIEK                                                                                                                                                                                                                    | K           | T      |          |                | 95.00%                                             |          |        |       |       |        |       |       |        |  | 29     |                | 824.4943  | 1        | 7.2       | 297  | 304  | No   |      |    |  |  |   |  |
|               |                                                                 |       | NSLYLQMSLR                                                                                                                                                                                                                  | K           | A      |          |                | 95.00%                                             |          |        |       |       |        |       |       |        |  | 62     | M7: Oxidation  | 677.8459  | 2        | 3.7       | 97   | 107  | Yes  |      |    |  |  |   |  |
|               |                                                                 |       | TTPPMLDSGDSFFLYSK                                                                                                                                                                                                           | K           | L      |          |                | 95.00%                                             |          |        |       |       |        |       |       |        |  | 84     | M5: Oxidation  | 961.4572  | 2        | 9.0       | 410  | 426  | No   |      |    |  |  |   |  |
|               |                                                                 |       | TTPPMLDSGDSFFLYSK                                                                                                                                                                                                           | K           | L      |          |                | 95.00%                                             |          |        |       |       |        |       |       |        |  | 55     | M5: Oxidation  | 641.3073  | 3        | 8.9       | 363  | 379  | No   |      |    |  |  |   |  |
|               |                                                                 |       | VVSVLTVVHQDWLNGK                                                                                                                                                                                                            | R           | E      |          |                | 95.00%                                             |          |        |       |       |        |       |       |        |  | 42     |                | 897.5079  | 2        | 9.3       | 319  | 334  | No   |      |    |  |  |   |  |
|               |                                                                 |       | VVSVLTVVHQDWLNGK                                                                                                                                                                                                            | R           | E      |          |                | 95.00%                                             |          |        |       |       |        |       |       |        |  | 38     |                | 598.6681  | 3        | -1.4      | 319  | 334  | No   |      |    |  |  |   |  |
|               |                                                                 |       | 717                                                                                                                                                                                                                         | IPI00409750 | OTUB1  |          |                | ISOFORM 2 OF UBIQUITIN THIOESTERASE PROTEIN OTUB1. |          |        |       |       |        |       |       |        |  | 95.00% | 32             |           | 413.5401 | 3         | 7.0  | 233  | 242  | No   |    |  |  |   |  |
|               |                                                                 |       |                                                                                                                                                                                                                             |             |        |          |                | FFEHFIEGGR                                         |          |        |       |       |        |       |       |        |  |        |                | K         |          |           |      |      |      |      |    |  |  | T |  |

|                       |                          |        |                                                               |                       |             |          |                                                 |                   |               |           |        |     |      |          |     |     |     |     |     |
|-----------------------|--------------------------|--------|---------------------------------------------------------------|-----------------------|-------------|----------|-------------------------------------------------|-------------------|---------------|-----------|--------|-----|------|----------|-----|-----|-----|-----|-----|
| 718                   | IPI00411706; IPI00641040 | ESD    | S-FORMYLGLUTATHIONE HYDROLASE.; 28 KDA PROTEIN.               | LLTSGYLQR             | R           | E        | 95.00%                                          | 53                |               | 525.8049  | 2      | 6.7 | 221  | 229      | No  |     |     |     |     |
|                       |                          |        |                                                               | AFSGYLGTDQSK          | K           | W        | 95.00%                                          | 49                |               | 637.3118  | 2      | 7.3 | 158  | 169      | Yes |     |     |     |     |
|                       |                          |        |                                                               | AYDATHLVK             | K           | S        | 95.00%                                          | 47                |               | 509.2753  | 2      | 5.6 | 172  | 180      | Yes |     |     |     |     |
|                       |                          |        |                                                               | FAVYVLPK              | K           | A        | 95.00%                                          | 30                |               | 467.7772  | 2      | 6.9 | 3    | 10       | No  |     |     |     |     |
|                       |                          |        |                                                               | KAFSGYLGTDQSK         | K           | W        | 95.00%                                          | 57                |               | 701.3568  | 2      | 3.0 | 157  | 169      | No  |     |     |     |     |
| 719                   | IPI00418163              | C4B    | COMPLEMENT COMPONENT 4B PREPROTEIN.                           | SGYHQSAHEGLVVIAPDTSR  | K           | G        | 95.00%                                          | 38                |               | 770.0561  | 3      | 9.0 | 36   | 57       | Yes |     |     |     |     |
|                       |                          |        |                                                               | SYPGSQLDILDQGG        | K           | D        | 95.00%                                          | 44                |               | 817.4315  | 2      | 6.9 | 181  | 195      | No  |     |     |     |     |
|                       |                          |        |                                                               | ALEILQEEDLIDEDDIPVR   | R           | S        | 95.00%                                          | 106               |               | 1113.0740 | 2      | 8.9 | 757  | 775      | Yes |     |     |     |     |
|                       |                          |        |                                                               | ASAGLLGAHAAITAYALTLTK | K           | A        | 95.00%                                          | 34                |               | 695.7328  | 3      | 5.7 | 1183 | 1204     | Yes |     |     |     |     |
|                       |                          |        |                                                               | DFALLSLQVPLK          | R           | D        | 95.00%                                          | 54                |               | 672.4054  | 2      | 6.5 | 81   | 92       | Yes |     |     |     |     |
|                       |                          |        |                                                               | DFALLSLQVPLKDAK       | R           | S        | 95.00%                                          | 43                |               | 553.3248  | 3      | 3.4 | 81   | 95       | Yes |     |     |     |     |
|                       |                          |        |                                                               | EGAIHREELVYELNPLDHR   | K           | G        | 95.00%                                          | 42                |               | 764.0633  | 3      | 7.1 | 936  | 954      | Yes |     |     |     |     |
|                       |                          |        |                                                               | EMSGSPASGIPVK         | R           | V        | 95.00%                                          | 29                | M2: Oxidation | 638.3207  | 2      | 6.4 | 392  | 404      | No  |     |     |     |     |
|                       |                          |        |                                                               | GLEEELQFSLGSK         | R           | I        | 95.00%                                          | 82                |               | 718.8721  | 2      | 6.1 | 1353 | 1365     | Yes |     |     |     |     |
|                       |                          |        |                                                               | GPEVQLVAHSPWLK        | R           | D        | 95.00%                                          | 57                |               | 780.9374  | 2      | 8.2 | 105  | 118      | Yes |     |     |     |     |
|                       |                          |        |                                                               | GSFEFPVGDVASK         | R           | V        | 95.00%                                          | 59                |               | 670.3372  | 2      | 9.8 | 917  | 929      | Yes |     |     |     |     |
|                       |                          |        |                                                               | GSSTWLTAFVLK          | R           | V        | 95.00%                                          | 39                |               | 655.3673  | 2      | 8.5 | 1073 | 1084     | No  |     |     |     |     |
|                       |                          |        |                                                               | HLVPGAPFLQALVR        | R           | E        | 95.00%                                          | 56                |               | 544.3354  | 3      | 6.6 | 377  | 391      | Yes |     |     |     |     |
|                       |                          |        |                                                               | LNMGITDLQGLR          | K           | L        | 95.00%                                          | 60                | M3: Oxidation | 673.8649  | 2      | 8.5 | 326  | 337      | Yes |     |     |     |     |
|                       |                          |        |                                                               | PVAFSVVPTAATAVSLK     | R           | V        | 95.00%                                          | 55                |               | 829.4875  | 2      | 8.7 | 896  | 912      | No  |     |     |     |     |
|                       |                          |        |                                                               | TTNIQGINLLFSSR        | R           | R        | 95.00%                                          | 82                |               | 782.4342  | 2      | 7.1 | 124  | 137      | Yes |     |     |     |     |
|                       |                          |        |                                                               | VGDTLNLNLR            | R           | A        | 95.00%                                          | 80                |               | 557.8180  | 2      | 5.4 | 485  | 494      | Yes |     |     |     |     |
| VLSLAQEQQVGGSEPK      | K                        | L      | 95.00%                                                        | 102                   |             | 771.4165 | 2                                               | 4.8               | 1085          | 1099      | Yes    |     |      |          |     |     |     |     |     |
| VTASDPLDLGSEGALSPGGVA |                          |        |                                                               |                       |             |          |                                                 |                   |               |           |        |     |      |          |     |     |     |     |     |
| SLLR                  | R                        | L      | 95.00%                                                        | 81                    |             | 828.4452 | 3                                               | 8.4               | 980           | 1005      | Yes    |     |      |          |     |     |     |     |     |
| YIYGKPVQGVAYVR        | R                        | F      | 95.00%                                                        | 31                    |             | 806.9493 | 2                                               | 3.5               | 270           | 283       | Yes    |     |      |          |     |     |     |     |     |
| YIYGKPVQGVAYVR        | R                        | F      | 95.00%                                                        | 42                    |             | 538.3026 | 3                                               | 4.3               | 270           | 283       | Yes    |     |      |          |     |     |     |     |     |
| 720                   | IPI00418495              | CD36   | PLATELET GLYCOPROTEIN 4.                                      | QVVLLEEGTIAFK         | K           | N        | 95.00%                                          | 70                |               | 667.3763  | 2      | 5.9 | 41   | 52       | No  |     |     |     |     |
|                       |                          |        |                                                               | SIYAVFESDVNLK         | R           | G        | 95.00%                                          | 40                |               | 742.8903  | 2      | 6.1 | 274  | 286      | No  |     |     |     |     |
|                       |                          |        |                                                               | TYLDIEPITGFTLQFAK     | R           | R        | 95.00%                                          | 92                |               | 979.0284  | 2      | 8.4 | 369  | 385      | No  |     |     |     |     |
|                       |                          |        |                                                               | TYLDIEPITGFTLQFAK     | R           | R        | 95.00%                                          | 60                |               | 653.0210  | 3      | 7.5 | 369  | 385      | No  |     |     |     |     |
|                       |                          |        |                                                               |                       |             |          |                                                 |                   |               |           |        |     |      |          |     |     |     |     |     |
| 721                   | IPI00419266              | NDUFA6 | NADH DEHYDROGENASE (UBIQUINONE) 1 ALPHA SUBCOMPLEX, 6, 14KDA. | FFHETEAPRPK           | R           | D        | 95.00%                                          | 44                |               | 679.8535  | 2      | 9.8 | 132  | 142      | No  |     |     |     |     |
|                       |                          |        |                                                               | FFHETEAPRPK           | R           | D        | 95.00%                                          | 39                |               | 453.5696  | 3      | 5.4 | 132  | 142      | No  |     |     |     |     |
|                       |                          |        |                                                               | VVDLLVIK              | R           | G        | 95.00%                                          | 62                |               | 449.8047  | 2      | 4.1 | 104  | 111      | No  |     |     |     |     |
| 722                   | IPI00419802              | HIBCH  | 3-HYDROXYISOBUTYRYL-COENZYME A HYDROLASE ISOFORM 1.           | AGIATHFVDSEK          | R           | L        | 95.00%                                          | 71                |               | 637.8248  | 2      | 2.9 | 210  | 221      | No  |     |     |     |     |
|                       |                          |        |                                                               | AGIATHFVDSEK          | R           | L        | 95.00%                                          | 33                |               | 425.5525  | 3      | 3.0 | 210  | 221      | No  |     |     |     |     |
|                       |                          |        |                                                               | AVLIDKDQSPK           | R           | W        | 95.00%                                          | 27                |               | 607.3472  | 2      | 5.7 | 348  | 358      | No  |     |     |     |     |
|                       |                          |        |                                                               | ENIASVLENYHTESK       | K           | I        | 95.00%                                          | 83                |               | 867.4280  | 2      | 7.8 | 238  | 252      | No  |     |     |     |     |
|                       |                          |        |                                                               | ENIASVLENYHTESK       | K           | I        | 95.00%                                          | 44                |               | 578.6201  | 3      | 5.8 | 238  | 252      | No  |     |     |     |     |
|                       |                          |        |                                                               | FLNALTLNMIR           | K           | Q        | 95.00%                                          | 49                | M9: Oxidation | 661.3718  | 2      | 4.2 | 56   | 66       | No  |     |     |     |     |
|                       |                          |        |                                                               | IAPVFFR               | K           | E        | 95.00%                                          | 36                |               | 425.2555  | 2      | 5.4 | 113  | 119      | No  |     |     |     |     |
|                       |                          |        |                                                               | KWEQDPETFLIIK         | K           | G        | 95.00%                                          | 33                |               | 587.3296  | 3      | 5.4 | 74   | 87       | No  |     |     |     |     |
|                       |                          |        |                                                               | LAMLEEDLLALK          | K           | S        | 95.00%                                          | 80                | M3: Oxidation | 687.8871  | 2      | 7.8 | 222  | 233      | No  |     |     |     |     |
|                       |                          |        |                                                               | LGYFLALTGFR           | K           | L        | 95.00%                                          | 73                |               | 629.3586  | 2      | 7.8 | 191  | 201      | No  |     |     |     |     |
|                       |                          |        |                                                               | SLGSSDLKF             | K           | -        | 95.00%                                          | 54                |               | 477.2524  | 2      | 2.8 | 378  | 386      | No  |     |     |     |     |
|                       |                          |        |                                                               | TLQEVLTMEYR           | K           | L        | 95.00%                                          | 70                | M8: Oxidation | 699.8549  | 2      | 5.8 | 321  | 331      | No  |     |     |     |     |
|                       |                          |        |                                                               | WEQDPETFLIIK          | K           | G        | 95.00%                                          | 50                |               | 816.4459  | 2      | 9.4 | 75   | 87       | No  |     |     |     |     |
|                       |                          |        |                                                               | 723                   | IPI00423460 | IGHA1    | HYPOTHETICAL PROTEIN DKFZP686G21220 (FRAGMENT). | DASGVTFWTWTPSSGK  | R             | S         | 95.00% | 82  |      | 770.8748 | 2   | 8.6 | 307 | 321 | Yes |
|                       |                          |        |                                                               |                       |             |          |                                                 | QEPSQGTTFVAVTSILR | R             | V         | 95.00% | 120 |      | 918.4847 | 2   | 6.1 | 436 | 452 | Yes |
| QEPSQGTTFVAVTSILR     | R                        | V      | 95.00%                                                        |                       |             |          |                                                 | 64                |               | 612.6580  | 3      | 4.3 | 436  | 452      | Yes |     |     |     |     |
| TPLTATLSK             | K                        | S      | 95.00%                                                        |                       |             |          |                                                 | 33                |               | 931.5471  | 1      | 0.5 | 366  | 374      | Yes |     |     |     |     |
| TPLTATLSK             | K                        | S      | 95.00%                                                        |                       |             |          |                                                 | 43                |               | 466.2780  | 2      | 1.8 | 366  | 374      | Yes |     |     |     |     |
| 724                   | IPI00452731              | NDUFA7 | NADH DEHYDROGENASE [UBIQUINONE] 1 ALPHA SUBCOMPLEX SUBUNIT 7. | WLQGSQELPR            | R           | E        | 95.00%                                          | 79                |               | 607.3225  | 2      | 3.4 | 417  | 426      | No  |     |     |     |     |
|                       |                          |        |                                                               | ALVSGKPAESSAVAATEK    | K           | K        | 95.00%                                          | 104               |               | 858.4708  | 2      | 9.2 | 75   | 92       | No  |     |     |     |     |
|                       |                          |        |                                                               | AVTPAPPIKR            | K           | W        | 95.00%                                          | 30                |               | 525.3322  | 2      | 8.8 | 94   | 103      | No  |     |     |     |     |
| NWASGHDLQGK           | R                        | L      | 95.00%                                                        | 68                    |             | 606.7948 | 2                                               | 4.5               | 13            | 23        | No     |     |      |          |     |     |     |     |     |

|     |                                       |                                                                                                                                                                                  |                                                                                                                                     |                        |   |   |        |    |                |           |   |      |      |      |    |
|-----|---------------------------------------|----------------------------------------------------------------------------------------------------------------------------------------------------------------------------------|-------------------------------------------------------------------------------------------------------------------------------------|------------------------|---|---|--------|----|----------------|-----------|---|------|------|------|----|
|     |                                       | HIST1H4A;<br>HIST1H4B;<br>HIST1H4C;<br>HIST1H4D;<br>HIST1H4E;<br>HIST1H4F;<br>HIST1H4H;<br>HIST1H4I;<br>HIST1H4J;<br>HIST1H4K;<br>HIST1H4L;<br>HIST2H4A;<br>HIST2H4B;<br>HIST4H4 |                                                                                                                                     |                        |   |   |        |    |                |           |   |      |      |      |    |
| 725 | IPI00453473                           |                                                                                                                                                                                  | HISTONE H4.                                                                                                                         | DNIQGITKPAIR           | R | R | 95.00% | 52 |                | 663.3867  | 2 | 8.5  | 25   | 36   | No |
|     |                                       |                                                                                                                                                                                  |                                                                                                                                     | DNIQGITKPAIR           | R | R | 95.00% | 45 |                | 442.5918  | 3 | 4.2  | 25   | 36   | No |
|     |                                       |                                                                                                                                                                                  |                                                                                                                                     | ISGLIYEETR             | R | G | 95.00% | 35 |                | 590.8140  | 2 | -1.1 | 47   | 56   | No |
|     |                                       |                                                                                                                                                                                  |                                                                                                                                     | TVTAMDVVYALK           | K | R | 95.00% | 32 | M5: Oxidation  | 663.8581  | 2 | 7.9  | 81   | 92   | No |
|     |                                       |                                                                                                                                                                                  |                                                                                                                                     | VFLENVIR               | K | D | 95.00% | 46 |                | 495.2957  | 2 | 5.2  | 61   | 68   | No |
| 726 | IPI00478003                           | A2M                                                                                                                                                                              | ALPHA-2-MACROGLOBULIN PRECURSOR.                                                                                                    | AAQVTIQSSGTFSSK        | K | F | 95.00% | 33 |                | 756.3942  | 2 | 6.6  | 1275 | 1289 | No |
|     |                                       |                                                                                                                                                                                  |                                                                                                                                     | AFQPFFVELTMPYSVIR      | R | G | 95.00% | 55 | M11: Oxidation | 1031.0370 | 2 | 6.8  | 788  | 804  | No |
|     |                                       |                                                                                                                                                                                  |                                                                                                                                     | AIGYLNTRYQR            | K | Q | 95.00% | 55 |                | 628.3306  | 2 | 7.7  | 1004 | 1014 | No |
|     |                                       |                                                                                                                                                                                  |                                                                                                                                     | ALLAYAFALAGNQDK        | K | R | 95.00% | 62 |                | 783.4267  | 2 | 8.1  | 1148 | 1162 | No |
|     |                                       |                                                                                                                                                                                  |                                                                                                                                     | ATVLNLYPK              | K | C | 95.00% | 39 |                | 509.8035  | 2 | 5.3  | 812  | 820  | No |
|     |                                       |                                                                                                                                                                                  |                                                                                                                                     | DTVIKPLLVPEGLEK        | K | E | 95.00% | 25 |                | 594.0131  | 3 | 6.9  | 897  | 912  | No |
|     |                                       |                                                                                                                                                                                  |                                                                                                                                     | FEVQVTVPK              | K | I | 95.00% | 32 |                | 523.8014  | 2 | 6.1  | 229  | 237  | No |
|     |                                       |                                                                                                                                                                                  |                                                                                                                                     | GHFSSIPVK              | K | S | 95.00% | 30 |                | 542.8158  | 2 | 7.5  | 522  | 531  | No |
|     |                                       |                                                                                                                                                                                  |                                                                                                                                     | HYDGSYSTFGER           | K | Y | 95.00% | 64 |                | 709.8071  | 2 | 6.1  | 1020 | 1031 | No |
|     |                                       |                                                                                                                                                                                  |                                                                                                                                     | IAQWQSFQLEGGK          | R | Q | 95.00% | 57 |                | 802.9333  | 2 | 9.3  | 175  | 188  | No |
|     |                                       |                                                                                                                                                                                  |                                                                                                                                     | KDTVIKPLLVPEGLEK       | R | E | 95.00% | 51 |                | 636.7081  | 3 | 1.3  | 896  | 912  | No |
|     |                                       |                                                                                                                                                                                  |                                                                                                                                     | LHTEAQIQEEGTVELTGR     | K | Q | 95.00% | 42 |                | 704.0364  | 3 | 7.4  | 320  | 338  | No |
|     |                                       |                                                                                                                                                                                  |                                                                                                                                     | LLIYAVLPTGDVIGDSAK     | R | Y | 95.00% | 76 |                | 923.0302  | 2 | 8.1  | 540  | 557  | No |
|     |                                       |                                                                                                                                                                                  |                                                                                                                                     | LLLQVQSLPELPGEYSMK     | R | V | 95.00% | 69 | M17: Oxidation | 1031.0590 | 2 | 7.2  | 1298 | 1315 | No |
|     |                                       |                                                                                                                                                                                  |                                                                                                                                     | LLLQVQSLPELPGEYSMK     | R | V | 95.00% | 43 | M17: Oxidation | 687.7086  | 3 | 7.6  | 1298 | 1315 | No |
|     |                                       |                                                                                                                                                                                  |                                                                                                                                     | LPPNVVEESAR            | K | A | 95.00% | 74 |                | 605.8286  | 2 | 5.1  | 935  | 945  | No |
|     |                                       |                                                                                                                                                                                  |                                                                                                                                     | MVSGFIPLKPTVK          | K | M | 95.00% | 56 | M1: Oxidation  | 716.9207  | 2 | 6.7  | 1385 | 1397 | No |
|     |                                       |                                                                                                                                                                                  |                                                                                                                                     | NEDSLVFGQTDK           | K | S | 95.00% | 78 |                | 697.8489  | 2 | 6.8  | 124  | 135  | No |
|     |                                       |                                                                                                                                                                                  |                                                                                                                                     | NOGNTWLTAFVLK          | R | T | 95.00% | 91 |                | 746.4082  | 2 | 8.4  | 1035 | 1047 | No |
|     |                                       |                                                                                                                                                                                  |                                                                                                                                     | QFSFPLSSEPFQGSYK       | K | V | 95.00% | 57 |                | 924.9518  | 2 | 8.1  | 189  | 204  | No |
|     |                                       |                                                                                                                                                                                  |                                                                                                                                     | SASNMAIVDVK            | R | M | 95.00% | 30 | M5: Oxidation  | 575.7958  | 2 | 5.3  | 1374 | 1384 | No |
|     |                                       |                                                                                                                                                                                  |                                                                                                                                     | SIYKPGQTVK             | K | F | 95.00% | 26 |                | 560.8232  | 2 | 1.6  | 136  | 145  | No |
|     |                                       |                                                                                                                                                                                  |                                                                                                                                     | SSGSLNNNAIK            | R | G | 95.00% | 35 |                | 552.3080  | 2 | 1.8  | 1082 | 1092 | No |
|     |                                       |                                                                                                                                                                                  |                                                                                                                                     | SSSNEEVMFLTVQVK        | K | G | 95.00% | 65 | M8: Oxidation  | 857.4288  | 2 | 7.6  | 94   | 108  | No |
|     |                                       |                                                                                                                                                                                  |                                                                                                                                     | TEHPFTVEEFVLPK         | R | F | 95.00% | 50 |                | 836.9387  | 2 | 6.5  | 215  | 228  | No |
|     |                                       |                                                                                                                                                                                  |                                                                                                                                     | TEHPFTVEEFVLPK         | R | F | 95.00% | 48 |                | 558.2943  | 3 | 5.1  | 215  | 228  | No |
|     |                                       |                                                                                                                                                                                  |                                                                                                                                     | TEVSSNHVLYLDK          | R | V | 95.00% | 81 |                | 809.4353  | 2 | 8.7  | 1408 | 1421 | No |
|     |                                       |                                                                                                                                                                                  |                                                                                                                                     | VDLSFSPQSPLPASHAHLR    | K | V | 95.00% | 30 |                | 513.0192  | 4 | 0.8  | 568  | 586  | No |
|     |                                       |                                                                                                                                                                                  |                                                                                                                                     | VGFYESDVMGR            | R | G | 95.00% | 66 | M9: Oxidation  | 638.2924  | 2 | 7.0  | 705  | 715  | No |
|     |                                       |                                                                                                                                                                                  |                                                                                                                                     | VSVQLEASPFLAVPVEK      | R | E | 95.00% | 82 |                | 942.5347  | 2 | 7.1  | 824  | 841  | No |
|     |                                       |                                                                                                                                                                                  |                                                                                                                                     | VSVQLEASPFLAVPVEK      | R | E | 95.00% | 37 |                | 628.6921  | 3 | 6.6  | 824  | 841  | No |
|     |                                       |                                                                                                                                                                                  |                                                                                                                                     | VVSMDENFHLNELIPLVYIQDP | K |   |        |    |                |           |   |      |      |      |    |
|     |                                       |                                                                                                                                                                                  |                                                                                                                                     | K                      | R | G | 95.00% | 36 | M4: Oxidation  | 942.8257  | 3 | 8.0  | 148  | 171  | No |
|     |                                       |                                                                                                                                                                                  |                                                                                                                                     | YGAATFTR               | K | T | 95.00% | 31 |                | 443.7266  | 2 | 3.6  | 1264 | 1271 | No |
| 727 | IPI00478292; IPI00744706; IPI00745092 | SPTAN1                                                                                                                                                                           | ISOFORM 1 OF SPECTRIN ALPHA CHAIN, BRAIN;<br>ISOFORM 3 OF SPECTRIN ALPHA CHAIN, BRAIN;<br>ISOFORM 2 OF SPECTRIN ALPHA CHAIN, BRAIN. | LGESQTLQQFSR           | K | D | 95.00% | 37 |                | 697.3640  | 2 | 9.0  | 1535 | 1546 | No |
|     |                                       |                                                                                                                                                                                  |                                                                                                                                     | SADESGQALLAAGHYASDEVK  | K | E | 95.00% | 46 |                | 716.3452  | 3 | 9.2  | 419  | 439  | No |
| 728 | IPI00478450                           | NDUFB11                                                                                                                                                                          | ISOFORM 2 OF NADH DEHYDROGENASE<br>[UBIQUINONE] 1 BETA SUBCOMPLEX SUBUNIT11,<br>MITOCHONDRIAL PRECURSOR.                            | K                      | K | N | 95.00% | 57 |                | 932.7674  | 3 | 7.9  | 47   | 69   | No |
|     |                                       |                                                                                                                                                                                  |                                                                                                                                     | TVVAPSAVAGK            | R | R | 95.00% | 29 |                | 500.2977  | 2 | 3.7  | 36   | 46   | No |
|     |                                       |                                                                                                                                                                                  |                                                                                                                                     | APLTYSLEK              | R | S | 95.00% | 31 |                | 511.2833  | 2 | 1.6  | 530  | 538  | No |
| 729 | IPI00478774                           | MYOM3                                                                                                                                                                            | MYOMESIN-3.                                                                                                                         | ASELVVMGDHDAAR         | K | R | 95.00% | 63 | M7: Oxidation  | 743.8563  | 2 | 5.9  | 461  | 474  | No |
|     |                                       |                                                                                                                                                                                  |                                                                                                                                     | FOWFFQR                | R | A | 95.00% | 30 |                | 529.7693  | 2 | 9.0  | 1153 | 1159 | No |
|     |                                       |                                                                                                                                                                                  |                                                                                                                                     | GNPITAYTIER            | R | C | 95.00% | 55 |                | 617.8302  | 2 | 7.5  | 401  | 411  | No |
|     |                                       |                                                                                                                                                                                  |                                                                                                                                     | GPPATLPPPAQVQAFR       | R | D | 95.00% | 28 |                | 823.9620  | 2 | 8.7  | 597  | 612  | No |
|     |                                       |                                                                                                                                                                                  |                                                                                                                                     | GPPATLPPPAQVQAFR       | R | D | 95.00% | 38 |                | 549.6413  | 3 | 3.8  | 597  | 612  | No |
|     |                                       |                                                                                                                                                                                  |                                                                                                                                     | IGALSATPLK             | R | I | 95.00% | 32 |                | 485.8039  | 2 | 6.2  | 1223 | 1232 | No |



|     |                                       |          |                                                                                                                               |                       |   |   |        |     |               |           |   |      |      |      |    |
|-----|---------------------------------------|----------|-------------------------------------------------------------------------------------------------------------------------------|-----------------------|---|---|--------|-----|---------------|-----------|---|------|------|------|----|
|     |                                       |          |                                                                                                                               | RTHLPEVFLSK           | R | V | 95.00% | 46  |               | 442.9248  | 3 | 4.0  | 353  | 363  | No |
|     |                                       |          |                                                                                                                               | THLPEVFLSK            | R | V | 95.00% | 30  |               | 585.8326  | 2 | 4.2  | 354  | 363  | No |
|     |                                       |          |                                                                                                                               | VPTADLEDVPLAEDITNLSK  | K | C | 95.00% | 91  |               | 1183.6440 | 2 | 3.8  | 243  | 264  | No |
|     |                                       |          |                                                                                                                               | VPTADLEDVPLAEDITNLSK  | K | C | 95.00% | 44  |               | 789.4343  | 3 | 6.9  | 243  | 264  | No |
|     |                                       |          |                                                                                                                               | YTFELSR               | K | R | 95.00% | 28  |               | 458.2353  | 2 | 5.7  | 346  | 352  | No |
| 739 | IPI00745471                           | SYNE1    | OTTHUMP0000017444.                                                                                                            | LETILK                | R | H | 95.00% | 32  |               | 716.4601  | 1 | 5.8  | 6403 | 6408 | No |
|     |                                       |          |                                                                                                                               | QSEADALAVLK           | K | K | 95.00% | 28  |               | 572.8198  | 2 | 8.9  | 2008 | 2018 | No |
| 740 | IPI00785200                           |          | HYPOTHETICAL PROTEIN.                                                                                                         | LTVLSQPK              | K | A | 95.00% | 26  |               | 443.2770  | 2 | 5.9  | 127  | 134  | No |
|     |                                       |          |                                                                                                                               | SGTSASLAISGLR         | K | S | 95.00% | 49  |               | 610.3409  | 2 | 7.6  | 87   | 99   | No |
| 741 | IPI00792352                           | RAN      | 26 KDA PROTEIN.                                                                                                               | FNVWDTAGQEK           | K | F | 95.00% | 53  |               | 647.8120  | 2 | 7.3  | 81   | 91   | No |
|     |                                       |          |                                                                                                                               | KYVATLGVVHPLVFHTNR    | K | G | 95.00% | 52  |               | 545.8069  | 4 | 2.8  | 58   | 76   | No |
|     |                                       |          |                                                                                                                               | SNYNFEKPFVLWLR        | K | K | 95.00% | 42  |               | 595.6465  | 3 | 6.5  | 173  | 186  | No |
|     |                                       |          | ISOFORM DELTA-1 OF SERINE/THREONINE-<br>PROTEIN PHOSPHATASE 2A 56                                                             |                       |   |   |        |     |               |           |   |      |      |      |    |
|     |                                       |          | KDAREGULATORY SUBUNIT DELTA ISOFORM.;                                                                                         |                       |   |   |        |     |               |           |   |      |      |      |    |
|     |                                       |          | ISOFORM DELTA-2 OF SERINE/THREONINE-<br>PROTEIN PHOSPHATASE 2A 56                                                             |                       |   |   |        |     |               |           |   |      |      |      |    |
|     |                                       |          | KDAREGULATORY SUBUNIT DELTA ISOFORM.;                                                                                         |                       |   |   |        |     |               |           |   |      |      |      |    |
|     |                                       |          | ISOFORM DELTA-3 OF SERINE/THREONINE-<br>PROTEIN PHOSPHATASE 2A 56                                                             |                       |   |   |        |     |               |           |   |      |      |      |    |
| 742 | IPI00000030; IPI00219543; IPI00219544 | PPP2R5D  | KDAREGULATORY SUBUNIT DELTA ISOFORM.                                                                                          | ESSLTPEVIVGLLK        | K | F | 95.00% | 41  |               | 742.9390  | 2 | 8.3  | 354  | 367  | No |
|     |                                       |          |                                                                                                                               | FLESPDFQPNIAK         | R | K | 95.00% | 56  |               | 753.3899  | 2 | 5.2  | 220  | 232  | No |
| 743 | IPI00000146                           | NT5C1A   | CYTOSOLIC 5'-NUCLEOTIDASE 1A.                                                                                                 | EAIDEGIAAATIFSPSR     | R | D | 95.00% | 85  |               | 874.4551  | 2 | 8.9  | 181  | 197  | No |
|     |                                       |          |                                                                                                                               | EPGPGAETAAAPVWEEAK    | R | I | 95.00% | 66  |               | 905.4434  | 2 | 7.0  | 14   | 31   | No |
|     |                                       |          |                                                                                                                               | GFLAALGR              | K | L | 95.00% | 54  |               | 431.7452  | 2 | 4.4  | 252  | 259  | No |
|     |                                       |          |                                                                                                                               | IFYDNLAPK             | K | K | 95.00% | 35  |               | 540.7931  | 2 | 4.9  | 32   | 40   | No |
|     |                                       |          |                                                                                                                               | LINSINHYDLFIER        | R | F | 95.00% | 94  |               | 873.9689  | 2 | 6.9  | 137  | 150  | No |
|     |                                       |          |                                                                                                                               | LINSINHYDLFIER        | R | F | 95.00% | 60  |               | 582.9813  | 3 | 5.9  | 137  | 150  | No |
|     |                                       |          |                                                                                                                               | MDEEQIYTEQGVEEYVR     | R | Y | 95.00% | 72  | M1: Oxidation | 1131.5010 | 2 | 2.9  | 64   | 81   | No |
|     |                                       |          |                                                                                                                               | VAFDGDVAVLFSDESER     | R | I | 95.00% | 87  |               | 878.9120  | 2 | 7.5  | 208  | 223  | No |
|     |                                       |          |                                                                                                                               | YQLEHENEFPSPGPAFPFVK  | R | A | 95.00% | 41  |               | 778.3854  | 3 | 7.0  | 82   | 101  | No |
|     |                                       |          | ISOFORM MITOCHONDRIAL OF MALONYL-COA<br>DECARBOXYLASE.                                                                        |                       |   |   |        |     |               |           |   |      |      |      |    |
|     |                                       |          | MITOCHONDRIALPRECURSOR.; ISOFORM<br>CYTOPLASMIC+PEROXISOMAL OF MALONYL-<br>COA DECARBOXYLASE,MITOCHONDRIAL<br>PRECURSOR.      |                       |   |   |        |     |               |           |   |      |      |      |    |
| 744 | IPI00000663; IPI00759655              | MLYCD    |                                                                                                                               | GFGVDHGQVAEQSAGVLHLR  | R | Q | 95.00% | 79  |               | 693.0281  | 3 | 5.1  | 94   | 113  | No |
|     |                                       |          |                                                                                                                               | YFLEETGPNSTSYLGSK     | R | I | 95.00% | 89  |               | 946.9576  | 2 | 8.2  | 456  | 472  | No |
| 745 | IPI00000873; IPI00829641              | VARS     | VALYL-TRNA SYNTHETASE.; 140 KDA PROTEIN.                                                                                      | LSAAVTEAFVR           | K | L | 95.00% | 96  |               | 582.3289  | 2 | 6.5  | 451  | 461  | No |
|     |                                       |          |                                                                                                                               | SSAQDPQAVLALGR        | R | A | 95.00% | 88  |               | 735.3937  | 2 | 5.6  | 123  | 137  | No |
| 746 | IPI00002270                           | C6orf211 | UPF0364 PROTEIN C6ORF211.                                                                                                     | IHEAIIGSPPIIDYFDVFK   | R | E | 95.00% | 35  |               | 711.3804  | 3 | 8.7  | 124  | 141  | No |
|     |                                       |          |                                                                                                                               | LRNELQTDKPFIFLVEK     | K | F | 95.00% | 42  |               | 680.7256  | 3 | 5.7  | 65   | 81   | No |
|     |                                       |          |                                                                                                                               | LRNELQTDKPFIFLVEK     | K | F | 95.00% | 37  |               | 510.7954  | 4 | 4.1  | 65   | 81   | No |
|     |                                       |          |                                                                                                                               | NELQTDKPFIFLVEK       | R | F | 95.00% | 32  |               | 590.9957  | 3 | 4.0  | 67   | 81   | No |
|     |                                       |          |                                                                                                                               | TIEDLDENQLKDEFFK      | R | L | 95.00% | 106 |               | 992.4890  | 2 | 7.5  | 168  | 183  | No |
|     |                                       |          |                                                                                                                               | TIEDLDENQLKDEFFK      | R | L | 95.00% | 40  |               | 661.9946  | 3 | 6.5  | 168  | 183  | No |
| 747 | IPI00002311                           | SCRN3    | SECERNIN-3.                                                                                                                   | ALNVIVDLLEK           | K | Y | 95.00% | 57  |               | 613.8760  | 2 | 6.5  | 126  | 136  | No |
|     |                                       |          |                                                                                                                               | EFDFAAAYSYLDTAK       | K | M | 95.00% | 92  |               | 856.4025  | 2 | 6.7  | 218  | 232  | No |
| 748 | IPI00002375                           | TMOD1    | TROPOMODULIN-1.                                                                                                               | FGYHFTQGGPR           | K | L | 95.00% | 43  |               | 669.3275  | 2 | 5.9  | 315  | 325  | No |
|     |                                       |          |                                                                                                                               | LEEVNLLNIR            | K | N | 95.00% | 31  |               | 607.3303  | 2 | -1.1 | 197  | 206  | No |
|     |                                       |          |                                                                                                                               | YRDLDEDEILGALTEEELR   | K | T | 95.00% | 36  |               | 760.3771  | 3 | 4.9  | 10   | 28   | No |
|     |                                       |          | ISOFORM 1 OF SERINE<br>HYDROXYMETHYLTRANSFERASE, CYTOSOLIC.;                                                                  |                       |   |   |        |     |               |           |   |      |      |      |    |
|     |                                       |          | ISOFORM 2 OF SERINE<br>HYDROXYMETHYLTRANSFERASE, CYTOSOLIC.                                                                   | ALSEALTELYGK          | R | I | 95.00% | 71  |               | 647.8520  | 2 | 5.1  | 337  | 348  | No |
| 749 | IPI00002519; IPI00220668              | SHMT1    |                                                                                                                               | MLAQPLKSDSEVVYNIK     | K | K | 95.00% | 39  | M1: Oxidation | 698.0408  | 3 | 3.2  | 21   | 38   | No |
| 750 | IPI00003918                           | RPL4     | 60S RIBOSOMAL PROTEIN L4.                                                                                                     | APIRPDIVNFVHTNLR      | K | K | 95.00% | 41  |               | 621.3549  | 3 | 4.7  | 30   | 45   | No |
|     |                                       |          |                                                                                                                               | APIRPDIVNFVHTNLR      | K | K | 95.00% | 34  |               | 466.2680  | 4 | 4.4  | 30   | 45   | No |
|     |                                       |          |                                                                                                                               | EAVLLLK               | K | K | 95.00% | 28  |               | 785.5170  | 1 | 4.1  | 166  | 172  | No |
|     |                                       |          |                                                                                                                               | NIPGITLLNVSK          | R | L | 95.00% | 42  |               | 634.8887  | 2 | 9.1  | 223  | 234  | No |
|     |                                       |          | LIPOAMIDE ACYLTRANSFERASE COMPONENT<br>OF BRANCHED-CHAIN ALPHA-KETO<br>ACIDDEHYDROGENASE COMPLEX,<br>MITOCHONDRIAL PRECURSOR. |                       |   |   |        |     |               |           |   |      |      |      |    |
| 751 | IPI00003944                           | DBT      |                                                                                                                               | ASHNIGIAMDTEQGLIVPNVK | K | N | 95.00% | 50  | M9: Oxidation | 741.7243  | 3 | 5.7  | 340  | 360  | No |
|     |                                       |          |                                                                                                                               | ILKEDILNYLEK          | R | Q | 95.00% | 82  |               | 745.9345  | 2 | 9.3  | 200  | 211  | No |
|     |                                       |          |                                                                                                                               | ILKEDILNYLEK          | R | Q | 95.00% | 58  |               | 497.6243  | 3 | 6.6  | 200  | 211  | No |
|     |                                       |          |                                                                                                                               | SYLENPAFMLLDLK        | K | - | 95.00% | 94  | M9: Oxidation | 835.4366  | 2 | 8.4  | 469  | 482  | No |
| 752 | IPI00004839                           | CRKL     | CRK-LIKE PROTEIN.                                                                                                             | IGDQEFDHLPALLEFYK     | K | I | 95.00% | 39  |               | 679.0171  | 3 | 8.8  | 73   | 89   | No |

|     |                          |          |                                                                                                                                                   |                        |   |   |        |     |                                 |           |   |     |     |     |    |
|-----|--------------------------|----------|---------------------------------------------------------------------------------------------------------------------------------------------------|------------------------|---|---|--------|-----|---------------------------------|-----------|---|-----|-----|-----|----|
|     |                          |          |                                                                                                                                                   | IHYLDTTTLIEPAPR        | K | Y | 95.00% | 47  |                                 | 580.6533  | 3 | 6.0 | 90  | 104 | No |
|     |                          |          |                                                                                                                                                   | TALALEVGDIVK           | K | V | 95.00% | 79  |                                 | 614.8636  | 2 | 3.1 | 254 | 265 | No |
|     |                          |          |                                                                                                                                                   | TLYDFPGNDAEDLFPFK      | R | K | 95.00% | 47  |                                 | 921.4416  | 2 | 8.4 | 130 | 145 | No |
| 753 | IPI00005198; IPI00641665 | ILF2     | INTERLEUKIN ENHANCER-BINDING FACTOR 2.;<br>12 KDA PROTEIN.                                                                                        | GTMTTGHNVADLVILK       | K | I | 95.00% | 34  | M3: Oxidation                   | 595.6626  | 3 | 7.8 | 111 | 127 | No |
|     |                          |          |                                                                                                                                                   | ILPTLEAVAALGNK         | K | V | 95.00% | 81  |                                 | 705.4256  | 2 | 4.6 | 128 | 141 | No |
|     |                          |          |                                                                                                                                                   | VLQSALAAIR             | K | H | 95.00% | 53  |                                 | 521.3259  | 2 | 1.6 | 197 | 206 | No |
| 754 | IPI00005809              | SDPR     | SERUM DEPRIVATION-RESPONSE PROTEIN.                                                                                                               | DNSQVNAVTVLTLDDK       | R | L | 95.00% | 126 |                                 | 865.4781  | 2 | 8.5 | 49  | 64  | No |
|     |                          |          |                                                                                                                                                   | SDGDPVQPAVLQVHQT       | R | - | 95.00% | 61  |                                 | 889.4462  | 2 | 6.9 | 409 | 425 | No |
|     |                          |          |                                                                                                                                                   | VLIFQEENEIPASVFK       | K | Q | 95.00% | 65  |                                 | 981.5415  | 2 | 8.3 | 157 | 173 | No |
| 755 | IPI00006114              | SERPINF1 | PIGMENT EPITHELIUM-DERIVED FACTOR<br>PRECURSOR.                                                                                                   | ALYYDLISSPDIHGTYK      | R | E | 95.00% | 46  |                                 | 652.6686  | 3 | 7.5 | 107 | 123 | No |
|     |                          |          |                                                                                                                                                   | ELLDVTVAPQK            | K | N | 95.00% | 41  |                                 | 607.8367  | 2 | 1.7 | 124 | 134 | No |
|     |                          |          |                                                                                                                                                   | LAAAVSNFGYDLYR         | K | V | 95.00% | 83  |                                 | 780.4013  | 2 | 5.8 | 54  | 67  | No |
|     |                          |          |                                                                                                                                                   | LQSLFDSPDFSK           | K | I | 95.00% | 59  |                                 | 692.3467  | 2 | 4.2 | 334 | 345 | No |
| 756 | IPI00006451              | NSF      | VESICLE-FUSING ATPASE.                                                                                                                            | GSMAGSTGVHDTVNNQLL     | R | I | 95.00% | 54  | M3: Oxidation                   | 673.0093  | 3 | 4.8 | 338 | 357 | No |
|     |                          |          |                                                                                                                                                   | LLDYVPIGPR             | R | F | 95.00% | 48  |                                 | 571.8350  | 2 | 4.0 | 608 | 617 | No |
|     |                          |          |                                                                                                                                                   | NFSGAELEGLVR           | K | A | 95.00% | 58  |                                 | 646.3387  | 2 | 3.9 | 435 | 446 | No |
|     |                          |          |                                                                                                                                                   | VLDDGELLVQQTK          | R | N | 95.00% | 72  |                                 | 729.3975  | 2 | 1.1 | 517 | 529 | No |
| 757 | IPI00006558; IPI00022824 | SH3GLB1  | ISOFORM 1 OF SH3 DOMAIN GRB2-LIKE PROTEIN<br>B1.; ISOFORM 2 OF SH3 DOMAIN GRB2-LIKE<br>PROTEIN B1.                                                | ELIQTSALNFLTPLR        | R | N | 95.00% | 66  |                                 | 858.4951  | 2 | 7.2 | 134 | 148 | No |
|     |                          |          |                                                                                                                                                   | GKVPITYLELLN           | K | - | 95.00% | 42  |                                 | 680.4022  | 2 | 5.7 | 354 | 365 | No |
|     |                          |          |                                                                                                                                                   | LAADAGTFLSR            | K | A | 95.00% | 66  |                                 | 561.3034  | 2 | 2.9 | 11  | 21  | No |
| 758 | IPI00006957; IPI00339238 | DHRS7    | ISOFORM 1 OF DEHYDROGENASE/REDUCTASE<br>SDR FAMILY MEMBER 7 PRECURSOR.; ISOFORM<br>2 OF DEHYDROGENASE/REDUCTASE SDR<br>FAMILY MEMBER 7 PRECURSOR. | EKDILVPLDLTDTGSHEAATK  | K | A | 95.00% | 62  |                                 | 789.4268  | 3 | 8.0 | 102 | 123 | No |
|     |                          |          |                                                                                                                                                   | IDILVNNNGMSQR          | R | S | 95.00% | 51  | M10: Oxidation                  | 716.8669  | 2 | 2.8 | 132 | 144 | No |
|     |                          |          |                                                                                                                                                   | LMLISMANDLK            | R | E | 95.00% | 32  | M2: Oxidation, M6:<br>Oxidation | 640.8368  | 2 | 5.0 | 272 | 282 | No |
| 759 | IPI00007183; IPI00169267 | ARL6IP2  | HYPOTHETICAL PROTEIN ARL6IP2.; ADP-<br>RIBOSYLATION FACTOR-LIKE PROTEIN 6-<br>INTERACTING PROTEIN 2.                                              | NLVPPLLAPENLVEK        | R | E | 95.00% | 53  |                                 | 831.5021  | 2 | 7.3 | 326 | 340 | No |
|     |                          |          |                                                                                                                                                   | SMLQATAEANNLAAVAGAR    | K | D | 95.00% | 97  | M2: Oxidation                   | 937.9798  | 2 | 6.6 | 373 | 391 | No |
| 760 | IPI00007675              | DYNC1LI1 | CYTOPLASMIC DYNEIN 1 LIGHT INTERMEDIATE<br>CHAIN 1.                                                                                               | AGATSEGVLANFFNSLLSK    | K | K | 95.00% | 110 |                                 | 963.5107  | 2 | 8.5 | 436 | 454 | No |
|     |                          |          |                                                                                                                                                   | IGILHENFQTLK           | K | A | 95.00% | 38  |                                 | 471.6036  | 3 | 3.4 | 333 | 344 | No |
|     |                          |          |                                                                                                                                                   | SVSSNVASVPIPAGSK       | R | K | 95.00% | 43  |                                 | 793.9260  | 2 | 3.3 | 412 | 428 | No |
| 761 | IPI00007682              | ATP6V1A  | VACUOLAR ATP SYNTHASE CATALYTIC SUBUNIT<br>A, UBIQUITOUS ISOFORM.                                                                                 | ALDEYYDKHFTEFVPLR      | R | T | 95.00% | 37  |                                 | 715.0278  | 3 | 8.3 | 460 | 476 | No |
|     |                          |          |                                                                                                                                                   | LAEMPADSGYPAYLGAR      | R | L | 95.00% | 72  | M4: Oxidation                   | 899.4329  | 2 | 5.3 | 365 | 381 | No |
|     |                          |          |                                                                                                                                                   | VGSHITGGDIYGIVSENSLIK  | R | H | 95.00% | 34  |                                 | 720.3862  | 3 | 3.6 | 143 | 163 | No |
| 762 | IPI00008219              | RAD23A   | UV EXCISION REPAIR PROTEIN RAD23<br>HOMOLOG A.                                                                                                    | DQPQFQNMNR             | R | Q | 95.00% | 31  | M8: Oxidation                   | 590.2682  | 2 | 5.9 | 237 | 245 | No |
|     |                          |          |                                                                                                                                                   | EDKSPSEESAPTTSPESVSGSV | R | E | 95.00% | 57  |                                 | 974.7802  | 3 | 5.6 | 120 | 149 | No |
|     |                          |          |                                                                                                                                                   | PSSGSSGR               | K | I | 95.00% | 34  |                                 | 487.9303  | 3 | 3.3 | 54  | 65  | No |
| 763 | IPI00008223              | RAD23B   | UV EXCISION REPAIR PROTEIN RAD23<br>HOMOLOG B.                                                                                                    | IDIDPEETVK             | K | A | 95.00% | 37  |                                 | 579.8004  | 2 | 2.7 | 15  | 24  | No |
|     |                          |          |                                                                                                                                                   | ILNDDTALKEYK           | K | I | 95.00% | 46  |                                 | 711.8812  | 2 | 4.5 | 52  | 63  | No |
|     |                          |          |                                                                                                                                                   | NFVVVMVTK              | K | P | 95.00% | 36  | M6: Oxidation                   | 526.7972  | 2 | 5.0 | 68  | 76  | No |
|     |                          |          |                                                                                                                                                   | NFVVVMVTKPK            | K | A | 95.00% | 64  | M6: Oxidation                   | 639.3717  | 2 | 5.1 | 68  | 78  | No |
|     |                          |          |                                                                                                                                                   | QEKPAEKPAETPVATSPTATDS | K | S | 95.00% | 70  |                                 | 982.4756  | 3 | 4.6 | 145 | 173 | No |
|     |                          |          |                                                                                                                                                   | TSGDSSR                | R | E | 95.00% | 116 |                                 | 1065.6340 | 2 | 9.5 | 290 | 308 | No |
|     |                          |          |                                                                                                                                                   | QIIQQNPSSLPALLOQIGR    | R | E | 95.00% | 37  |                                 | 710.7578  | 3 | 8.3 | 290 | 308 | No |
| 764 | IPI00009104              | RUVBL2   | RUVB-LIKE 2.                                                                                                                                      | EVVHTVSLHEIDVINSR      | K | T | 95.00% | 36  |                                 | 649.6846  | 3 | 4.3 | 237 | 253 | No |
|     |                          |          |                                                                                                                                                   | GLGLDDALEPR            | R | Q | 95.00% | 71  |                                 | 578.3079  | 2 | 5.7 | 30  | 40  | No |
|     |                          |          |                                                                                                                                                   | LLIVSTTPYSEK           | R | D | 95.00% | 41  |                                 | 675.8819  | 2 | 2.8 | 354 | 365 | No |
|     |                          |          |                                                                                                                                                   | TQGFALFSGDTGEIK        | R | S | 95.00% | 111 |                                 | 842.4376  | 2 | 4.6 | 254 | 269 | No |
| 765 | IPI00009634              | SQRDL    | SULFIDE:QUINONE OXIDOREDUCTASE,<br>MITOCHONDRIAL PRECURSOR.                                                                                       | EGNAIFTFPNTPVK         | K | C | 95.00% | 50  |                                 | 767.9045  | 2 | 6.8 | 187 | 200 | No |
|     |                          |          |                                                                                                                                                   | TAAAVAAQSGILDR         | K | T | 95.00% | 67  |                                 | 672.3722  | 2 | 6.2 | 345 | 358 | No |
|     |                          |          |                                                                                                                                                   | VGAENVAIVPSEK          | K | H | 95.00% | 34  |                                 | 735.3868  | 2 | 3.9 | 66  | 79  | No |
|     |                          |          |                                                                                                                                                   | VILAEFDYK              | R | A | 95.00% | 55  |                                 | 549.3003  | 2 | 4.0 | 388 | 396 | No |
|     |                          |          |                                                                                                                                                   | YADALQEIQER            | K | N | 95.00% | 78  |                                 | 724.8784  | 2 | 7.1 | 242 | 253 | No |

|     |                                                    |        |                                                                                                                                              |                               |   |   |        |     |                 |          |   |     |     |     |     |
|-----|----------------------------------------------------|--------|----------------------------------------------------------------------------------------------------------------------------------------------|-------------------------------|---|---|--------|-----|-----------------|----------|---|-----|-----|-----|-----|
| 766 | IPI00010314; IPI000442121; IPI00790373             | ALAD   | DELTA-AMINOLEVULINIC ACID DEHYDRATASE.; DELTA-AMINOLEVULINIC ACID DEHYDRATASE ISOFORM A.; DELTA-AMINOLEVULINIC ACID DEHYDRATASE ISOFORM B.   | GSAADSEESPAIEAIHLR            | R | K | 95.00% | 42  |                 | 656.0051 | 3 | 5.8 | 120 | 138 | No  |
| 767 | IPI00010720                                        | CCT5   | T-COMPLEX PROTEIN 1 SUBUNIT EPSILON.                                                                                                         | LAEVALAYAK                    | R | A | 95.00% | 72  |                 | 524.8085 | 2 | 4.5 | 159 | 168 | No  |
|     |                                                    |        |                                                                                                                                              | AVTIFIR                       | R | G | 95.00% | 49  |                 | 410.2601 | 2 | 3.8 | 382 | 388 | No  |
|     |                                                    |        |                                                                                                                                              | DVDFELIK                      | R | V | 95.00% | 41  |                 | 489.7633 | 2 | 4.0 | 203 | 210 | No  |
|     |                                                    |        |                                                                                                                                              | DVDFELIKVEGK                  | R | V | 95.00% | 68  |                 | 696.3766 | 2 | 2.1 | 203 | 214 | No  |
|     |                                                    |        |                                                                                                                                              | HKLDVTSVEDYK                  | K | A | 95.00% | 43  |                 | 717.3698 | 2 | 2.7 | 264 | 275 | No  |
|     |                                                    |        |                                                                                                                                              | HKLDVTSVEDYK                  | K | A | 95.00% | 43  |                 | 478.5821 | 3 | 2.0 | 264 | 275 | No  |
|     |                                                    |        |                                                                                                                                              | ISDSVLVDIKDTEPLIQ TAK         | K | T | 95.00% | 61  |                 | 729.0740 | 3 | 4.1 | 151 | 170 | No  |
|     |                                                    |        |                                                                                                                                              | LDVTSVEDYK                    | K | A | 95.00% | 52  |                 | 584.7927 | 2 | 3.0 | 266 | 275 | No  |
|     |                                                    |        |                                                                                                                                              | LGFAGLVQEISFGTTK              | K | D | 95.00% | 121 |                 | 834.4616 | 2 | 8.6 | 353 | 368 | No  |
|     |                                                    |        |                                                                                                                                              | VAIEHLDKISDSVLVDIKDTEPLIQ TAK | R | T | 95.00% | 42  |                 | 773.4338 | 4 | 5.9 | 143 | 170 | No  |
|     |                                                    |        |                                                                                                                                              | WVGGPEIELIAIATGGR             | R | I | 95.00% | 86  |                 | 869.9829 | 2 | 4.9 | 324 | 340 | No  |
| 768 | IPI00012442                                        | G3BP1  | RAS GTPASE-ACTIVATING PROTEIN-BINDING PROTEIN 1.                                                                                             | LPNFGFVVFDDSEPVQK             | K | V | 95.00% | 71  |                 | 969.4919 | 2 | 5.5 | 377 | 393 | No  |
| 769 | IPI00012578                                        | KPNA4  | IMPORTIN ALPHA-4 SUBUNIT.                                                                                                                    | SSSPAPADIAQTQVEDLR            | K | T | 95.00% | 84  | S3: Phospho     | 982.9602 | 2 | 8.0 | 230 | 247 | No  |
|     |                                                    |        |                                                                                                                                              | DAQVVQVVDGLSNILK              | K | M | 95.00% | 129 |                 | 906.0226 | 2 | 5.2 | 424 | 440 | No  |
|     |                                                    |        |                                                                                                                                              | DAQVVQVVDGLSNILK              | K | M | 95.00% | 107 |                 | 604.3514 | 3 | 5.9 | 424 | 440 | No  |
|     |                                                    |        |                                                                                                                                              | EAAWAINSLTISGR                | K | K | 95.00% | 92  |                 | 744.9005 | 2 | 8.1 | 387 | 400 | Yes |
|     |                                                    |        |                                                                                                                                              | IEQLQNHENEDIYK                | K | L | 95.00% | 77  |                 | 886.9291 | 2 | 2.8 | 462 | 475 | No  |
|     |                                                    |        |                                                                                                                                              | KLLSSDRNPPIDDLIK              | R | S | 95.00% | 27  |                 | 608.6829 | 3 | 5.2 | 97  | 112 | Yes |
|     |                                                    |        |                                                                                                                                              | LLSSDRNPPIDDLIK               | K | S | 95.00% | 55  |                 | 848.4745 | 2 | 7.6 | 98  | 112 | Yes |
|     |                                                    |        |                                                                                                                                              | NPPIDDLIK                     | R | S | 95.00% | 39  |                 | 512.7897 | 2 | 3.3 | 104 | 112 | Yes |
| 770 | IPI00013068                                        | EIF3S6 | EUKARYOTIC TRANSLATION INITIATION FACTOR 3 SUBUNIT 6.                                                                                        | HLVFPILLEFLSVK                | R | E | 95.00% | 31  |                 | 771.4647 | 2 | 7.8 | 17  | 29  | No  |
|     |                                                    |        |                                                                                                                                              | HLVFPILLEFLSVK                | R | E | 95.00% | 27  |                 | 514.6440 | 3 | 4.3 | 17  | 29  | No  |
|     |                                                    |        |                                                                                                                                              | LGHVVMGNNAVSPYQQVIEK          | K | T | 95.00% | 42  | M6: Oxidation   | 733.7173 | 3 | 6.1 | 388 | 407 | No  |
|     |                                                    |        |                                                                                                                                              | LKETIDNNSVSSPLQSQQR           | R | T | 95.00% | 65  |                 | 753.0674 | 3 | 3.4 | 192 | 211 | No  |
|     |                                                    |        |                                                                                                                                              | MLFDYLADK                     | R | H | 95.00% | 38  | M1: Oxidation   | 566.2768 | 2 | 5.3 | 112 | 120 | No  |
|     |                                                    |        |                                                                                                                                              | NLYSDDIPHALR                  | K | E | 95.00% | 58  |                 | 707.3620 | 2 | 2.4 | 60  | 71  | No  |
|     |                                                    |        |                                                                                                                                              | QLQAETPIVK                    | K | M | 95.00% | 32  |                 | 628.3506 | 2 | 2.7 | 83  | 93  | No  |
|     |                                                    |        |                                                                                                                                              | YLTTAVITNK                    | R | D | 95.00% | 31  |                 | 562.3235 | 2 | 2.5 | 256 | 265 | No  |
| 771 | IPI00013122                                        | CDC37  | HSP90 CO-CHAPERONE CDC37.                                                                                                                    | DVQMLQDAISK                   | K | M | 95.00% | 56  | M4: Oxidation   | 632.3189 | 2 | 3.5 | 313 | 323 | No  |
|     |                                                    |        |                                                                                                                                              | EGEEAGPGDPLLEAVPK             | K | T | 95.00% | 95  |                 | 854.4332 | 2 | 8.2 | 353 | 369 | No  |
|     |                                                    |        |                                                                                                                                              | LQAEAQQLR                     | R | K | 95.00% | 32  |                 | 528.7958 | 2 | 3.2 | 84  | 92  | No  |
|     |                                                    |        |                                                                                                                                              | QYMEGFNDELEAFK                | R | E | 95.00% | 70  | M3: Oxidation   | 868.8839 | 2 | 7.0 | 247 | 260 | No  |
|     |                                                    |        |                                                                                                                                              | SMPWNVDTLSK                   | K | D | 95.00% | 32  | M2: Oxidation   | 647.3140 | 2 | 4.0 | 111 | 121 | No  |
|     |                                                    |        |                                                                                                                                              | SMVNTKPEKTEEDSEEVK            | K | E | 95.00% | 51  | M2: Oxidation   | 708.6658 | 3 | 2.3 | 127 | 144 | No  |
|     |                                                    |        |                                                                                                                                              |                               |   |   |        |     | M10: Oxidation, |          |   |     |     |     |     |
| 772 | IPI00013219                                        | ILK    | INTEGRIN-LINKED PROTEIN KINASE.                                                                                                              | EVPFADLSNMEIGMK               | R | V | 95.00% | 64  | M14: Oxidation  | 856.9041 | 2 | 7.5 | 389 | 403 | No  |
|     |                                                    |        |                                                                                                                                              | FDMIVPILEK                    | K | M | 95.00% | 36  | M3: Oxidation   | 610.8383 | 2 | 6.9 | 439 | 448 | No  |
| 773 | IPI00013466; IPI00783136                           | ASNA1  | ARSA ARSENITE TRANSPORTER, ATP-BINDING, HOMOLOG 1 VARIANT.; ARSENICAL PUMP-DRIVING ATPASE.                                                   | LEETLPVIR                     | K | S | 95.00% | 51  |                 | 535.3186 | 2 | 3.2 | 237 | 245 | No  |
|     |                                                    |        |                                                                                                                                              | LLNFPTIVER                    | R | G | 95.00% | 45  |                 | 601.3542 | 2 | 4.9 | 176 | 185 | No  |
| 774 | IPI00015856; IPI00029820; IPI00658188; IPI00658215 | DNPEP  | HYPOTHETICAL PROTEIN DNPEP.; DNPEP PROTEIN (FRAGMENT).; 48 KDA PROTEIN.; 52 KDA PROTEIN.                                                     | GFFELFPSLSHLLVD               | K | - | 95.00% | 55  |                 | 917.9819 | 2 | 9.7 | 363 | 378 | No  |
|     |                                                    |        |                                                                                                                                              | GTPEPGPLNAVDER                | K | H | 95.00% | 48  |                 | 726.3626 | 2 | 2.9 | 105 | 118 | No  |
|     |                                                    |        |                                                                                                                                              | LEQQLVHVERPILR                | R | I | 95.00% | 38  |                 | 577.3438 | 3 | 4.5 | 53  | 66  | No  |
|     |                                                    |        |                                                                                                                                              | YASNAVSEALIR                  | R | E | 95.00% | 69  |                 | 647.3471 | 2 | 4.8 | 284 | 295 | No  |
| 775 | IPI00016249; IPI00554715                           | FXR1   | ISOFORM 1 OF FRAGILE X MENTAL RETARDATION SYNDROME-RELATED PROTEIN 1.; ISOFORM 2 OF FRAGILE X MENTAL RETARDATION SYNDROME-RELATED PROTEIN 1. | EISEGDEVEVYSR                 | K | A | 95.00% | 66  |                 | 756.3498 | 2 | 3.4 | 58  | 70  | No  |
|     |                                                    |        |                                                                                                                                              | GFLEFVEDFIQVPR                | R | N | 95.00% | 83  |                 | 848.4486 | 2 | 8.5 | 277 | 290 | No  |
|     |                                                    |        |                                                                                                                                              | GFLEFVEDFIQVPR                | R | N | 95.00% | 58  |                 | 565.9666 | 3 | 5.5 | 277 | 290 | No  |
|     |                                                    |        |                                                                                                                                              | KVPGVTAIELDEDGTGFR            | R | I | 95.00% | 55  |                 | 650.0095 | 3 | 5.0 | 246 | 263 | No  |
| 776 | IPI00016405                                        | OCIA1  | OCIA DOMAIN CONTAINING 1 ISOFORM 1.                                                                                                          | LENSPLGALR                    | K | S | 95.00% | 56  |                 | 599.8287 | 2 | 5.2 | 105 | 115 | No  |
|     |                                                    |        |                                                                                                                                              | SVPLAATSMITQGLISK             | R | G | 95.00% | 89  | M9: Oxidation   | 923.5300 | 2 | 8.7 | 47  | 64  | No  |

|     |                                       |         |                                                                                                                                                                           |                                                                                                                                                                                            |                                                     |                                                     |                                                                                                  |                                                                |  |  |                                                                                                                                  |                                                     |                                                                    |                                                                         |                                                                         |                                                                        |
|-----|---------------------------------------|---------|---------------------------------------------------------------------------------------------------------------------------------------------------------------------------|--------------------------------------------------------------------------------------------------------------------------------------------------------------------------------------------|-----------------------------------------------------|-----------------------------------------------------|--------------------------------------------------------------------------------------------------|----------------------------------------------------------------|--|--|----------------------------------------------------------------------------------------------------------------------------------|-----------------------------------------------------|--------------------------------------------------------------------|-------------------------------------------------------------------------|-------------------------------------------------------------------------|------------------------------------------------------------------------|
| 777 | IPI00016458; IPI00029239              | L2HGDH  | ISOFORM 1 OF L-2-HYDROXYGLUTARATE DEHYDROGENASE, MITOCHONDRIALPRECURSOR.; ISOFORM 2 OF L-2-HYDROXYGLUTARATE DEHYDROGENASE, MITOCHONDRIALPRECURSOR.                        | HPSLSIGVLEK<br>LASQNFYSYGVTEMYK<br>LIVAVEQEIEIPR<br>AFAMIIDKLEEDINSSMTNSTAAS<br>RPPVTLR<br>ESTGAQVQVAGDMLPNSTER<br>ESTGAQVQVAGDMLPNSTER<br>IANPVEGSSGR<br>IITLTGPTNAIFK                    | R<br>K<br>K<br>K<br>K<br>R<br>R<br>R<br>R           | E<br>A<br>L                                         | 95.00%<br>95.00%<br>95.00%                                                                       | 44<br>55<br>50                                                 |  |  | 590.3430<br>877.4139<br>698.3997                                                                                                 | 2<br>2<br>2                                         | 3.5<br>5.4<br>4.7                                                  | 71<br>360<br>137                                                        | 81<br>374<br>148                                                        | No<br>No<br>No                                                         |
| 778 | IPI00016610                           | PCBP1   | POLY(RC)-BINDING PROTEIN 1.                                                                                                                                               | RPPVTLR<br>ESTGAQVQVAGDMLPNSTER<br>ESTGAQVQVAGDMLPNSTER<br>IANPVEGSSGR<br>IITLTGPTNAIFK                                                                                                    | K<br>R<br>R<br>K<br>R                               | L                                                   | 95.00%<br>95.00%<br>95.00%<br>95.00%                                                             | 65<br>107<br>52<br>61<br>72                                    |  |  | 853.4374<br>1053.4940<br>702.6662<br>543.7835<br>694.9147                                                                        | 4<br>2<br>3<br>2<br>2                               | 9.7<br>1.6<br>2.6<br>4.5<br>4.4                                    | 71<br>125<br>125<br>315<br>58                                           | 101<br>144<br>144<br>325<br>70                                          | No<br>No<br>No<br>No<br>No                                             |
| 779 | IPI00016801                           | GLUD1   | GLUTAMATE DEHYDROGENASE 1, MITOCHONDRIAL PRECURSOR.                                                                                                                       | DDGSWEVIEGYR<br>DSNYHLLMSVQESLER<br>GASIVEDKLVEDLR<br>GFIGPGIDVPAPDMSTGER<br>HGGTIPIVPTAEFQDR<br>IIAEGANGPTTPEADKIFLER<br>MVEGFFDR<br>TAAYVNAIEK<br>YNLGLDLR<br>YSTDVSVEVK<br>ELVNNLGEIYQK | R<br>R<br>R<br>K<br>K<br>K<br>K<br>R<br>K<br>R<br>K | A<br>K<br>T<br>E<br>I<br>N<br>G<br>V<br>T<br>A<br>I | 95.00%<br>95.00%<br>95.00%<br>95.00%<br>95.00%<br>95.00%<br>95.00%<br>95.00%<br>95.00%<br>95.00% | 41<br>45<br>74<br>67<br>77<br>64<br>35<br>32<br>69<br>54<br>66 |  |  | 713.3223<br>968.9629<br>772.4263<br>966.4678<br>869.4578<br>748.0684<br>508.7298<br>540.2919<br>482.2693<br>621.3022<br>710.3816 | 2<br>2<br>2<br>2<br>2<br>3<br>2<br>2<br>2<br>2<br>2 | 5.6<br>5.4<br>7.4<br>5.2<br>8.6<br>7.8<br>2.0<br>4.5<br>5.2<br>5.0 | 125<br>461<br>77<br>213<br>481<br>400<br>69<br>536<br>528<br>152<br>330 | 136<br>476<br>90<br>231<br>496<br>420<br>76<br>545<br>535<br>162<br>341 | No<br>No<br>No<br>No<br>No<br>No<br>Yes<br>No<br>No<br>No<br>Yes<br>No |
| 780 | IPI00017184                           | EHD1    | EH DOMAIN-CONTAINING PROTEIN 1.                                                                                                                                           | LADVDDKGLLDEEFALANHLIK<br>LDISDEFSEVIK<br>LFEAEEQDLFKDIQSLPR<br>LNAFGNAFLNR<br>FYEEVHDLER<br>GIPEFWFTIFR<br>LDNVPHTPSSYIETLPK<br>NVDMLSELVQEYDEPIIK<br>QVPNESFFNFFNPLK<br>YAALYQPLFDK      | K<br>K<br>K<br>K<br>K<br>K<br>R<br>R<br>K<br>K      | V<br>A<br>N<br>F<br>K<br>N<br>A<br>H<br>G<br>R      | 95.00%<br>95.00%<br>95.00%<br>95.00%<br>95.00%<br>95.00%<br>95.00%<br>95.00%<br>95.00%<br>95.00% | 62<br>52<br>40<br>49<br>51<br>39<br>65<br>84<br>66<br>50       |  |  | 852.1143<br>697.8617<br>726.7123<br>618.8325<br>668.8165<br>706.8764<br>637.6700<br>1076.0370<br>914.4649<br>664.8522            | 3<br>2<br>3<br>2<br>2<br>2<br>3<br>2<br>2<br>2      | 9.0<br>7.2<br>5.9<br>6.6<br>5.8<br>5.8<br>4.0<br>5.8<br>8.3<br>5.6 | 487<br>194<br>270<br>125<br>84<br>158<br>61<br>169<br>283<br>95         | 509<br>205<br>287<br>135<br>93<br>168<br>186<br>186<br>297<br>105       | No<br>No<br>No<br>No<br>No<br>No<br>No<br>No<br>No<br>No               |
| 782 | IPI00017895; IPI00719611              | GPD2    | ISOFORM 1 OF GLYCEROL-3-PHOSPHATE DEHYDROGENASE, MITOCHONDRIALPRECURSOR.; ISOFORM 2 OF GLYCEROL-3-PHOSPHATE DEHYDROGENASE, MITOCHONDRIALPRECURSOR.                        | ANLLEIAPHLSAPLPIMLPVYK<br>GFITIVDVR<br>LAFLNVQAAEEALPR<br>LAFLNVQAAEEALPR<br>LVQDYGLESEVAQHLAATYGDK<br>LVSEFFPYIEAEVK<br>MNLAIALTAAR<br>SEISLLPSDIDR<br>VIFFLPWQK<br>YGAATANYMEVVSLLK      | R<br>K<br>R<br>R<br>R<br>R<br>R<br>R<br>R<br>R      | W<br>V<br>I<br>I<br>A<br>Y<br>Y<br>Y<br>M<br>K      | 95.00%<br>95.00%<br>95.00%<br>95.00%<br>95.00%<br>95.00%<br>95.00%<br>95.00%<br>95.00%<br>95.00% | 55<br>58<br>96<br>38<br>50<br>60<br>69<br>55<br>48<br>90       |  |  | 806.1356<br>574.3298<br>821.4572<br>547.9736<br>803.0706<br>762.4073<br>580.8309<br>672.8583<br>589.3440<br>873.4491             | 3<br>2<br>2<br>3<br>3<br>2<br>2<br>2<br>2<br>2      | 9.5<br>3.5<br>6.1<br>5.1<br>7.4<br>4.6<br>6.6<br>5.7<br>2.3<br>6.9 | 19<br>641<br>558<br>432<br>483<br>526<br>102<br>616<br>214<br>239       | 40<br>650<br>572<br>446<br>504<br>538<br>112<br>627<br>222<br>254       | No<br>No<br>No<br>No<br>No<br>No<br>No<br>No<br>No<br>No               |
| 783 | IPI00018140; IPI00402183; IPI00402185 | SYNCRIP | ISOFORM 1 OF HETEROGENEOUS NUCLEAR RIBONUCLEOPROTEIN Q.; ISOFORM 3 OF HETEROGENEOUS NUCLEAR RIBONUCLEOPROTEIN Q.; ISOFORM 5 OF HETEROGENEOUS NUCLEAR RIBONUCLEOPROTEIN Q. | DLFEDELVPLFEK<br>NLANTVTEEILEK                                                                                                                                                             | R<br>R                                              | A<br>A                                              | 95.00%<br>95.00%                                                                                 | 44<br>64                                                       |  |  | 797.4117<br>737.3998                                                                                                             | 2<br>2                                              | 6.4<br>7.8                                                         | 172<br>344                                                              | 184<br>356                                                              | No<br>No                                                               |
| 784 | IPI00018813; IPI00743825              | COPS2   | ISOFORM 2 OF COP9 SIGNALOSOME COMPLEX SUBUNIT 2.; ISOFORM 1 OF COP9 SIGNALOSOME COMPLEX SUBUNIT 2.                                                                        | AHTDFFEAFK<br>AHTDFFEAFK<br>ALYEQSLHIK<br>IDQVNQLLELDHQK<br>IDQVNQLLELDHQK<br>IHIPFISK<br>SGINPFDSQEAQPK<br>VLELEGEKGEWGFK                                                                 | K<br>K<br>K<br>R<br>R<br>R<br>K<br>K                | N<br>N<br>S<br>R<br>R<br>E<br>N<br>A                | 95.00%<br>95.00%<br>95.00%<br>95.00%<br>95.00%<br>95.00%<br>95.00%<br>95.00%                     | 32<br>37<br>37<br>74<br>34<br>29<br>50<br>32                   |  |  | 606.7913<br>404.8616<br>601.3356<br>846.9583<br>564.9715<br>477.7944<br>840.9175<br>540.9502                                     | 2<br>3<br>2<br>2<br>3<br>2<br>2<br>3                | 4.7<br>0.1<br>4.3<br>9.8<br>3.9<br>3.3<br>2.2<br>4.6               | 264<br>264<br>223<br>412<br>412<br>379<br>299<br>57                     | 273<br>273<br>232<br>425<br>425<br>386<br>313<br>70                     | No<br>No<br>No<br>No<br>No<br>No<br>No<br>No                           |





|     |                                       |          |                                                                                                                                                                                              |                         |   |   |        |     |                |           |   |      |     |     |     |
|-----|---------------------------------------|----------|----------------------------------------------------------------------------------------------------------------------------------------------------------------------------------------------|-------------------------|---|---|--------|-----|----------------|-----------|---|------|-----|-----|-----|
| 807 | IPI00024934                           | MUT      | METHYLMALONYL-COA MUTASE,<br>MITOCHONDRIAL PRECURSOR.                                                                                                                                        | YYASEIAGQTTSK           | K | C | 95.00% | 97  |                | 709.8476  | 2 | 4.9  | 372 | 384 | No  |
|     |                                       |          |                                                                                                                                                                                              | AAVQVLDIEK              | K | C | 95.00% | 51  |                | 600.8304  | 2 | 4.4  | 731 | 741 | No  |
|     |                                       |          |                                                                                                                                                                                              | IDSGSEVIVGNK            | R | Y | 95.00% | 70  |                | 658.8600  | 2 | 4.5  | 479 | 491 | No  |
|     |                                       |          |                                                                                                                                                                                              | IADIFEYTK               | K | H | 95.00% | 51  |                | 642.3519  | 2 | 5.4  | 241 | 251 | No  |
|     |                                       |          |                                                                                                                                                                                              | ILFDGIPLEK              | K | M | 95.00% | 45  |                | 572.8378  | 2 | 5.0  | 172 | 181 | No  |
| 808 | IPI00026813; IPI00607601; IPI00607790 | FNTA     | PROTEIN<br>FARNESYLTRANSFERASE/GERANYLGERANYLTR<br>ANSFERASE TYPE I ALPHASUBUNIT.;<br>FARNESYLTRANSFERASE, CAAX BOX, ALPHA<br>ISOFORM C.; FARNESYLTRANSFERASE, CAAX<br>BOX, ALPHA ISOFORM B. | LTGTIQNDILK             | K | E | 95.00% | 61  |                | 608.3532  | 2 | 2.8  | 213 | 223 | No  |
|     |                                       |          |                                                                                                                                                                                              | NTQIIQEESGIPK           | R | V | 95.00% | 67  |                | 785.4326  | 2 | 5.3  | 407 | 420 | No  |
|     |                                       |          |                                                                                                                                                                                              | DPSQELEFIADILNQDAK      | R | N | 95.00% | 103 |                | 1023.5150 | 2 | 9.5  | 181 | 198 | No  |
|     |                                       |          |                                                                                                                                                                                              | DPSQELEFIADILNQDAK      | R | N | 95.00% | 49  |                | 682.6763  | 3 | 4.8  | 181 | 198 | No  |
|     |                                       |          |                                                                                                                                                                                              | EVQYTLEMIK              | R | L | 95.00% | 52  | M8: Oxidation  | 635.3271  | 2 | 4.8  | 259 | 268 | No  |
| 809 | IPI00028091                           | ACTR3    | ACTIN-LIKE PROTEIN 3.                                                                                                                                                                        | VLVEWLR                 | R | D | 95.00% | 36  |                | 457.7789  | 2 | 4.1  | 107 | 113 | No  |
|     |                                       |          |                                                                                                                                                                                              | YFVISNTTGYNDR           | R | A | 95.00% | 51  |                | 775.3724  | 2 | 5.4  | 241 | 253 | No  |
|     |                                       |          |                                                                                                                                                                                              | AEPEDHYFLLETPPLNTPENR   | R | E | 95.00% | 43  |                | 828.0751  | 3 | 8.3  | 103 | 123 | No  |
|     |                                       |          |                                                                                                                                                                                              | DITYFIQQLLR             | R | D | 95.00% | 71  |                | 705.3972  | 2 | 4.9  | 199 | 209 | No  |
|     |                                       |          |                                                                                                                                                                                              | DREVGIPPEQSLETK         | R | A | 95.00% | 68  |                | 884.9615  | 2 | 3.8  | 210 | 225 | No  |
| 810 | IPI00028366                           | SETD7    | HISTONE-LYSINE N-METHYLTRANSFERASE, H3<br>LYSINE-4 SPECIFIC SET7.                                                                                                                            | FMEQVIFK                | R | Y | 95.00% | 37  |                | 529.2751  | 2 | 2.9  | 92  | 99  | No  |
|     |                                       |          |                                                                                                                                                                                              | GVDDLDFFIGDEAIEKPTYATK  | K | W | 95.00% | 83  | M2: Oxidation  | 815.4085  | 3 | 9.1  | 54  | 75  | No  |
|     |                                       |          |                                                                                                                                                                                              | IAYVYPDER               | K | T | 95.00% | 39  |                | 563.2847  | 2 | 3.0  | 144 | 152 | No  |
|     |                                       |          |                                                                                                                                                                                              | SGPEAPEWYQVELK          | K | A | 95.00% | 59  |                | 816.9061  | 2 | 8.1  | 345 | 358 | No  |
|     |                                       |          |                                                                                                                                                                                              | VYVAESLISSAGEGLFSK      | R | V | 95.00% | 113 |                | 928.9949  | 2 | 9.5  | 216 | 233 | No  |
| 811 | IPI00028369; IPI00784901; IPI00785171 | KIAA1715 | ISOFORM 1 OF PROTEIN LUNAPARK.; ISOFORM 3<br>OF PROTEIN LUNAPARK.; ISOFORM 2 OF<br>PROTEIN LUNAPARK.                                                                                         | IVEYLVGDGPQNR           | R | Y | 95.00% | 55  |                | 730.3856  | 2 | 6.0  | 259 | 271 | No  |
|     |                                       |          |                                                                                                                                                                                              | TVTTPALSSNVLPR          | R | H | 95.00% | 37  |                | 677.8928  | 2 | 6.1  | 211 | 223 | No  |
| 812 | IPI00029012                           | EIF3S10  | EUKARYOTIC TRANSLATION INITIATION FACTOR<br>3 SUBUNIT 10.                                                                                                                                    | FNVLQYVYVPEVK           | R | D | 95.00% | 40  |                | 717.9058  | 2 | 2.8  | 377 | 388 | No  |
|     |                                       |          |                                                                                                                                                                                              | LTSLVPFVDAFQLER         | R | A | 95.00% | 30  |                | 867.9805  | 2 | 5.8  | 455 | 469 | No  |
| 813 | IPI00029643                           | ZAK      | ISOFORM 2 OF MITOGEN-ACTIVATED PROTEIN<br>KINASE KINASE KINASE MLT.                                                                                                                          | EAEILSVLSHR             | K | N | 95.00% | 67  |                | 627.3477  | 2 | 1.7  | 53  | 63  | No  |
|     |                                       |          |                                                                                                                                                                                              | EAEILSVLSHR             | K | N | 95.00% | 44  |                | 418.5689  | 3 | 4.5  | 53  | 63  | No  |
|     |                                       |          |                                                                                                                                                                                              | LTEQSNTPLLLPLAAR        | K | M | 95.00% | 81  |                | 869.0077  | 2 | 9.3  | 322 | 337 | No  |
|     |                                       |          |                                                                                                                                                                                              | NVVAADGVLK              | R | I | 95.00% | 41  |                | 549.8315  | 2 | 2.6  | 138 | 148 | No  |
|     |                                       |          |                                                                                                                                                                                              | GPVKPTGGPGGGGTQTQQMMN   | R | N | 95.00% | 64  | M20: Oxidation | 794.7391  | 3 | 7.5  | 23  | 46  | No  |
| 814 | IPI00030320                           | DDX6     | PROBABLE ATP-DEPENDENT RNA HELICASE<br>DDX6.                                                                                                                                                 | QLK                     | R | N | 95.00% | 64  |                | 725.3594  | 2 | 6.6  | 308 | 319 | No  |
|     |                                       |          |                                                                                                                                                                                              | GVTQYYAYVTER            | K | Q | 95.00% | 32  |                | 586.8364  | 2 | 0.8  | 163 | 174 | No  |
|     |                                       |          |                                                                                                                                                                                              | ASSVVVSGTPIR            | R | R | 95.00% | 74  |                | 549.8199  | 2 | 0.6  | 48  | 57  | No  |
|     |                                       |          |                                                                                                                                                                                              | HLFTGPVLSK              | K | H | 95.00% | 37  |                | 834.5063  | 2 | 5.7  | 32  | 47  | No  |
|     |                                       |          |                                                                                                                                                                                              | IGVAIGDQILDLSIK         | R | H | 95.00% | 83  |                | 477.2870  | 2 | -1.1 | 212 | 220 | No  |
| 815 | IPI00031708; IPI00793664              | FAH      | FUMARYLACETOACETASE.; 33 KDA PROTEIN.                                                                                                                                                        | LGPEPIISK               | R | A | 95.00% | 25  |                | 737.9283  | 2 | 7.2  | 83  | 95  | No  |
|     |                                       |          |                                                                                                                                                                                              | VFLQNLLSVSQAR           | R | L | 95.00% | 86  |                |           |   |      |     |     |     |
|     |                                       |          |                                                                                                                                                                                              | EDGNEEDKENQGDDETQQGQPP  | R | R | 95.00% | 43  |                | 876.7128  | 3 | 6.9  | 257 | 279 | No  |
|     |                                       |          |                                                                                                                                                                                              | QR                      | K | Y | 95.00% | 122 |                | 848.4381  | 2 | 0.9  | 119 | 137 | No  |
|     |                                       |          |                                                                                                                                                                                              | GAEAAANVTGPGGVPVQGSK    | R | Q | 95.00% | 55  | M14: Oxidation | 810.6416  | 4 | 5.6  | 205 | 234 | No  |
| 816 | IPI00031812; IPI00385699; IPI00643351 | YBX1     | NUCLEASE SENSITIVE ELEMENT-BINDING<br>PROTEIN 1.; 35 KDA PROTEIN.; PROTEIN.                                                                                                                  | SVGDGETVEFDVVEGEK       | R | G | 95.00% | 118 |                | 898.4222  | 2 | 7.0  | 102 | 118 | Yes |
|     |                                       |          |                                                                                                                                                                                              | AGEQGRPV                | R | Q | 95.00% | 55  |                |           |   |      |     |     |     |
|     |                                       |          |                                                                                                                                                                                              | RPQYSNPPVQGEVMEGADNQG   | R | Q | 95.00% | 55  |                |           |   |      |     |     |     |
|     |                                       |          |                                                                                                                                                                                              | AGEQGRPV                | R | Q | 95.00% | 55  |                |           |   |      |     |     |     |
|     |                                       |          |                                                                                                                                                                                              | SVGDGETVEFDVVEGEK       | R | G | 95.00% | 118 |                |           |   |      |     |     |     |
| 817 | IPI00031820                           | FARSA    | PHENYLALANYL-TRNA SYNTHETASE ALPHA<br>CHAIN.                                                                                                                                                 | LDAEPRPPPTQEA           | R | - | 95.00% | 32  |                | 746.3784  | 2 | 2.9  | 495 | 508 | No  |
|     |                                       |          |                                                                                                                                                                                              | SLQALGEVIEAELR          | K | S | 95.00% | 112 |                | 764.4291  | 2 | 7.8  | 43  | 56  | No  |
| 818 | IPI00032179                           | SERPINC1 | ANTITHROMBIN III VARIANT.                                                                                                                                                                    | EQLQDMGLVDLFSPEK        | K | S | 95.00% | 74  |                | 932.9597  | 2 | 5.8  | 366 | 381 | No  |
|     |                                       |          |                                                                                                                                                                                              | EVPLNTIIFMGR            | R | V | 95.00% | 58  | M6: Oxidation  | 703.3842  | 2 | 6.5  | 447 | 458 | No  |
|     |                                       |          |                                                                                                                                                                                              | FRIEDGFSLK              | R | E | 95.00% | 35  | M10: Oxidation | 606.3278  | 2 | 4.3  | 356 | 365 | No  |
|     |                                       |          |                                                                                                                                                                                              | FRIEDGFSLK              | R | E | 95.00% | 46  |                | 404.5536  | 3 | 2.0  | 356 | 365 | No  |
|     |                                       |          |                                                                                                                                                                                              | NDNDNIFLSPSISTAFAMTK    | K | L | 95.00% | 44  | M19: Oxidation | 1158.0760 | 2 | 9.2  | 104 | 124 | No  |
| 819 | IPI00033025; IPI00552502; IPI00816201 | SEPT7    | ISOFORM 1 OF SEPTIN-7.; CELL DIVISION CYCLE<br>10 ISOFORM 2.; ISOFORM 2 OF SEPTIN-7.                                                                                                         | TSDQIHFFFAK             | K | L | 95.00% | 53  |                | 670.8392  | 2 | 4.9  | 148 | 158 | No  |
|     |                                       |          |                                                                                                                                                                                              | VAEGTQVLELFPKGDITMVLPLP | K | L | 95.00% | 53  |                |           |   |      |     |     |     |
|     |                                       |          |                                                                                                                                                                                              | KPEK                    | R | S | 95.00% | 32  | M19: Oxidation | 1032.9120 | 3 | 9.8  | 296 | 323 | No  |
|     |                                       |          |                                                                                                                                                                                              | FEDYLNAESR              | K | V | 95.00% | 49  |                | 622.2876  | 2 | 6.3  | 139 | 148 | No  |
|     |                                       |          |                                                                                                                                                                                              | VNIPLIAK                | K | A | 95.00% | 36  |                | 490.8316  | 2 | 4.4  | 188 | 196 | No  |

|     |                                                                 |               |                                                                                                                                                                            |                                                                                                                        |                                 |                                 |                                                                    |                                        |                                                                                                   |                                 |                                               |                                             |                                             |                                        |
|-----|-----------------------------------------------------------------|---------------|----------------------------------------------------------------------------------------------------------------------------------------------------------------------------|------------------------------------------------------------------------------------------------------------------------|---------------------------------|---------------------------------|--------------------------------------------------------------------|----------------------------------------|---------------------------------------------------------------------------------------------------|---------------------------------|-----------------------------------------------|---------------------------------------------|---------------------------------------------|----------------------------------------|
| 820 | IPI00043073; IPI00178745; IPI00298800; IPI00384414              | GYPA          | GLYCOPHORIN ERIK (STA) PRECURSOR.; GLYCOPHORIN MZ II-V.; GLYCOPHORIN A PRECURSOR.; GLYCOPHORIN ERIK I-IV PRECURSOR.                                                        | KSPSDVKPLPSPDTPVPLSSVEI<br>ENPETSQ<br>SPSDVKPLPSPDTPVPLSSVEIE<br>NPETSQ                                                | K<br>K                          | -<br>-                          | 95.00%<br>95.00%                                                   | 81<br>81                               | 1103.2150<br>1060.5190                                                                            | 3<br>3                          | 6.7<br>8.9                                    | 120<br>121                                  | 150<br>150                                  | No<br>No                               |
| 821 | IPI00065491; IPI00748058                                        | STAC3         | ISOFORM 1 OF SH3 AND CYSTEINE-RICH DOMAIN-CONTAINING PROTEIN 3.; ISOFORM 2 OF SH3 AND CYSTEINE-RICH DOMAIN-CONTAINING PROTEIN 3.                                           | EVLESPKPSFPAETR<br>ITVIDDSNEEWWR<br>KVGLFPTDFLEEI<br>NDPVFETLR<br>VGFPPNFIR<br>VGLFPTDFLEEI                            | K<br>K<br>R<br>R<br>K<br>K      | Q<br>G<br>-<br>T<br>V<br>-      | 95.00%<br>95.00%<br>95.00%<br>95.00%<br>95.00%<br>95.00%           | 42<br>48<br>52<br>42<br>38<br>44       | 843.9421<br>831.8998<br>754.4136<br>545.7818<br>653.8730<br>690.3630                              | 2<br>2<br>2<br>2<br>2<br>2      | 3.5<br>9.3<br>9.6<br>2.1<br>5.2<br>5.9        | 5<br>274<br>352<br>174<br>293<br>353        | 19<br>286<br>364<br>182<br>303<br>364       | No<br>No<br>No<br>No<br>No<br>No       |
| 822 | IPI00075080; IPI00219941                                        | OSBPL1A       | ISOFORM B OF OXYSTEROL-BINDING PROTEIN-RELATED PROTEIN 1.; ISOFORM A OF OXYSTEROL-BINDING PROTEIN-RELATED PROTEIN 1.                                                       | ITMPVIFNEPLSFLQR<br>NDFSIWSILR<br>NYFNLPDIY<br>TGKPFNPLLGETYELVR                                                       | K<br>R<br>R<br>R                | L<br>K<br>-<br>D                | 95.00%<br>95.00%<br>95.00%<br>95.00%                               | 30<br>66<br>51<br>46                   | M3: Oxidation<br>641.0193<br>625.8349<br>579.7809<br>645.3550                                     | 3<br>2<br>2<br>3                | 8.5<br>6.9<br>5.8<br>5.5                      | 51<br>545<br>942<br>108                     | 66<br>554<br>950<br>124                     | No<br>No<br>No<br>No                   |
| 823 | IPI00096066                                                     | SUCLG2        | SUCCINYL-COA LIGASE [GDP-FORMING] BETA-CHAIN, MITOCHONDRIAL PRECURSOR.                                                                                                     | EQIDIFEGIK<br>ETYLAILMDR<br>FFVADTANEALEAAK<br>ILNNSGLPITSAILDEAAK<br>ILNNSGLPITSAILDEAAKK<br>INFDDNAEFR               | K<br>R<br>R<br>K<br>K<br>K      | D<br>S<br>R<br>K<br>A<br>Q      | 95.00%<br>95.00%<br>95.00%<br>95.00%<br>95.00%<br>95.00%           | 32<br>50<br>72<br>70<br>37<br>58       | M8: Oxidation<br>596.3216<br>620.8201<br>798.9051<br>1028.0590<br>728.4081<br>620.7875            | 2<br>2<br>2<br>2<br>3<br>2      | 7.6<br>6.1<br>7.1<br>6.4<br>7.4<br>5.9        | 191<br>151<br>59<br>404<br>404<br>269       | 200<br>160<br>73<br>423<br>424<br>269       | No<br>No<br>No<br>No<br>No<br>No       |
| 824 | IPI00100247                                                     | TXNDC13       | THIOREDOXIN DOMAIN-CONTAINING PROTEIN 13 PRECURSOR.                                                                                                                        | FFVTTLPAFFHAK<br>VDVIQEPGLSGR                                                                                          | R<br>K                          | D<br>F                          | 95.00%<br>95.00%                                                   | 54<br>48                               | 509.2825<br>635.3481                                                                              | 3<br>2                          | 7.2<br>6.2                                    | 103<br>91                                   | 115<br>102                                  | No<br>No                               |
| 825 | IPI00100292; IPI00168532; IPI00252412; IPI00744937; IPI00746278 | NPEPL1; STX16 | ISOFORM 1 OF PROBABLE AMINOPEPTIDASE NPEPL1.; ISOFORM 3 OF PROBABLE AMINOPEPTIDASE NPEPL1.; ISOFORM 2 OF PROBABLE AMINOPEPTIDASE NPEPL1.; 52 KDA PROTEIN.; 56 KDA PROTEIN. | ELGHIPTIIRDEELK<br>ELGHIPTIIRDEELK<br>HNSPSAAHFITR                                                                     | K<br>K<br>R                     | T<br>T<br>L                     | 95.00%<br>95.00%<br>95.00%                                         | 43<br>38<br>52                         | 870.0096<br>580.3402<br>446.5641                                                                  | 2<br>3<br>3                     | 8.9<br>5.1<br>3.8                             | 207<br>207<br>86                            | 221<br>221<br>97                            | No<br>No<br>No                         |
| 826 | IPI00101405; IPI00797614                                        | FDPS          | FARNESYL DIPHOSPHATE SYNTHASE.; FARNESYL PYROPHOSPHATE SYNTHETASE.                                                                                                         | ATPEQYQILK<br>VLTEDEMGHPEIGDAIAR                                                                                       | R<br>R                          | E<br>L                          | 95.00%<br>95.00%                                                   | 42<br>76                               | 595.8270<br>984.9779                                                                              | 2<br>2                          | 3.4<br>7.1                                    | 278<br>27                                   | 287<br>44                                   | No<br>No                               |
| 827 | IPI00105598                                                     | PSMD11        | PROTEASOME 26S NON-ATPASE SUBUNIT 11 VARIANT (FRAGMENT).                                                                                                                   | AELRDDPIIETHLAK<br>EQSILELGSLLAK<br>IMLNTPEDVQALVSGK<br>LYDNLLEQNLR<br>TGQAAELGGLLK<br>VQIEHISSLIK<br>VQIEHISSLIK      | R<br>K<br>K<br>K<br>K<br>R<br>R | L<br>T<br>L<br>V<br>Y<br>L<br>L | 95.00%<br>95.00%<br>95.00%<br>95.00%<br>95.00%<br>95.00%<br>95.00% | 44<br>65<br>77<br>52<br>69<br>70<br>34 | M7: Oxidation<br>560.3112<br>700.9100<br>865.9592<br>752.4183<br>579.3343<br>633.8765<br>422.9206 | 3<br>2<br>2<br>2<br>2<br>2<br>3 | 2.8<br>8.5<br>6.1<br>7.7<br>6.5<br>2.2<br>3.2 | 311<br>47<br>259<br>326<br>60<br>345<br>345 | 325<br>59<br>274<br>337<br>71<br>355<br>355 | No<br>No<br>No<br>No<br>No<br>No<br>No |
| 828 | IPI00156689                                                     | VAT1          | SYNAPTIC VESICLE MEMBRANE PROTEIN VAT-1 HOMOLOG.                                                                                                                           | GVDIVMDPLGGSDTAK<br>PAAPPAPGPGQLTLR                                                                                    | K<br>R                          | G<br>L                          | 95.00%<br>95.00%                                                   | 88<br>44                               | M6: Oxidation<br>795.8921<br>721.9134                                                             | 2<br>2                          | 4.8<br>4.7                                    | 256<br>68                                   | 271<br>82                                   | No<br>No                               |
| 829 | IPI00163230                                                     | COPS6         | COP9 SIGNALOSOME COMPLEX SUBUNIT 6.                                                                                                                                        | ASEAGEVPFNHEILR<br>ASEAGEVPFNHEILR<br>SQEGRPVQVIGALIGK<br>GSVPYDAELSFALR                                               | K<br>K<br>R<br>K                | E<br>E<br>Q<br>T                | 95.00%<br>95.00%<br>95.00%<br>95.00%                               | 45<br>49<br>37<br>82                   | 834.9256<br>556.9528<br>551.3243<br>762.8963                                                      | 2<br>3<br>3<br>2                | 5.2<br>4.8<br>4.6<br>9.8                      | 244<br>244<br>60<br>356                     | 258<br>258<br>75<br>369                     | No<br>No<br>No<br>No                   |
| 830 | IPI00164528                                                     | SNTA1         | ALPHA-1-SYNTROPHIN.                                                                                                                                                        | HGVDTHLFSVESPOQLAAWTR<br>VKDELQALLAATSTAGSQDIK                                                                         | R<br>R                          | Q<br>Q                          | 95.00%<br>95.00%                                                   | 72<br>31                               | 794.0689<br>720.3954                                                                              | 3<br>3                          | 9.5<br>6.7                                    | 374<br>275                                  | 394<br>295                                  | No<br>No                               |
| 831 | IPI00165261; IPI00374338; IPI00794956                           | SCFD1         | SEC1 FAMILY DOMAIN-CONTAINING PROTEIN 1.; VESICLE TRANSPORT-RELATED PROTEIN ISOFORM B.; VESICLE TRANSPORT-RELATED PROTEIN ISOFORM A VARIANT (FRAGMENT).                    | FGQDIISPLLSVK<br>LIDLHTNVATAVLEHIK<br>LIDLHTNVATAVLEHIK<br>LTSAVSSLPLEK<br>SKLEDIANAALAAASAVTQVAK<br>SLLDIISDPDAGTPEDK | R<br>R<br>R<br>K<br>R<br>K      | E<br>A<br>A<br>K<br>V<br>M      | 95.00%<br>95.00%<br>95.00%<br>95.00%<br>95.00%<br>95.00%           | 43<br>50<br>47<br>53<br>37<br>93       | 708.9147<br>629.6995<br>472.5262<br>743.9275<br>691.0576<br>893.4488                              | 2<br>3<br>2<br>4<br>3<br>2      | 7.9<br>6.5<br>5.7<br>6.8<br>8.4<br>7.6        | 51<br>331<br>331<br>382<br>125<br>437       | 63<br>347<br>347<br>395<br>145<br>453       | No<br>No<br>No<br>No<br>No<br>No       |

|     |                                                                                                                     |        |                                                                                                                                                                                                                                                                                                                                                                                                                                                                                                                                                                                                                                                                                                                                                                                      |                                                                                                    |                            |                            |                                                          |                                  |                                  |                                                                       |                            |                                        |                                       |                                        |                                       |
|-----|---------------------------------------------------------------------------------------------------------------------|--------|--------------------------------------------------------------------------------------------------------------------------------------------------------------------------------------------------------------------------------------------------------------------------------------------------------------------------------------------------------------------------------------------------------------------------------------------------------------------------------------------------------------------------------------------------------------------------------------------------------------------------------------------------------------------------------------------------------------------------------------------------------------------------------------|----------------------------------------------------------------------------------------------------|----------------------------|----------------------------|----------------------------------------------------------|----------------------------------|----------------------------------|-----------------------------------------------------------------------|----------------------------|----------------------------------------|---------------------------------------|----------------------------------------|---------------------------------------|
| 832 | IPI00166866; IPI00386879                                                                                            | IGHA1  | IGHA1 PROTEIN.; CDNA FLJ14473 FIS, CLONE MAMMA1001080, HIGHLY SIMILAR TO HOMO SAPIENSSNC73 PROTEIN (SNC73) MRNA.                                                                                                                                                                                                                                                                                                                                                                                                                                                                                                                                                                                                                                                                     | DASGVFTFWTPSSGK<br>NSLYLQMNSLR<br>QEPSQGTTFVAVTSILR<br>QEPSQGTTFVAVTSILR<br>TPLTATLSK<br>TPLTATLSK | R<br>K<br>R<br>R<br>K<br>K | S<br>V<br>V<br>V<br>S<br>S | 95.00%<br>95.00%<br>95.00%<br>95.00%<br>95.00%<br>95.00% | 68<br>54<br>99<br>59<br>32<br>42 | M7: Oxidation                    | 770.8742<br>677.8461<br>918.4871<br>612.6591<br>931.5513<br>466.2785  | 2<br>2<br>3<br>2<br>1<br>2 | 7.8<br>4.0<br>8.7<br>6.1<br>5.1<br>2.9 | 295<br>96<br>424<br>424<br>354<br>362 | 309<br>106<br>440<br>440<br>362<br>362 | Yes<br>No<br>Yes<br>Yes<br>Yes<br>Yes |
| 833 | IPI00167515; IPI00745895                                                                                            | ZADH1  | ISOFORM 1 OF ZINC-BINDING ALCOHOL DEHYDROGENASE DOMAIN-CONTAININGPROTEIN 1.; SIMILAR TO ZINC BINDING ALCOHOL DEHYDROGENASE, DOMAIN CONTAINING 1.                                                                                                                                                                                                                                                                                                                                                                                                                                                                                                                                                                                                                                     | DKFEPGILQLSQWFK<br>DVPYPPLSPAIEAIQK<br>GDFVTSFYWPWQTK<br>MEEVYLPDNINEGVQVQR<br>TLYLSVDPYMR         | K<br>K<br>K<br>R<br>R      | E<br>E<br>V<br>T<br>C      | 95.00%<br>95.00%<br>95.00%<br>95.00%<br>95.00%           | 34<br>32<br>47<br>95<br>36       | M1: Oxidation<br>M10: Oxidation  | 612.6656<br>918.0074<br>881.4244<br>1075.0250<br>687.3463             | 3<br>2<br>2<br>2<br>2      | 6.2<br>6.1<br>7.5<br>8.4<br>5.2        | 224<br>192<br>93<br>25<br>43          | 238<br>208<br>106<br>42<br>53          | No<br>No<br>No<br>No<br>No            |
| 834 | IPI00168407                                                                                                         | PDPR   | HYPOTHETICAL PROTEIN DKFZP686J1643.                                                                                                                                                                                                                                                                                                                                                                                                                                                                                                                                                                                                                                                                                                                                                  | DSNLLLEDVTKW<br>INAGLNVIGIPSEISPK                                                                  | K<br>R                     | Y<br>K                     | 95.00%<br>95.00%                                         | 39<br>30                         |                                  | 716.8760<br>918.0435                                                  | 2<br>2                     | 8.1<br>7.9                             | 609<br>143                            | 620<br>160                             | No<br>No                              |
| 835 | IPI00172450; IPI00172452; IPI00216378; IPI00296678; IPI00334344; IPI00336118; IPI00556423; IPI00646849              | CAMK2G | ISOFORM 4 OF CALCIUM/CALMODULIN-DEPENDENT PROTEIN KINASE TYPE II GAMMACHAIN.; CALCIUM/CALMODULIN-DEPENDENT PROTEIN KINASE II GAMMA ISOFORM 6.; CALCIUM/CALMODULIN-DEPENDENT PROTEIN KINASE II GAMMA ISOFORM 1.; CALCIUM/CALMODULIN-DEPENDENT PROTEIN KINASE II GAMMA ISOFORM 2.; ISOFORM 1 OF CALCIUM/CALMODULIN-DEPENDENT PROTEIN KINASE TYPE II GAMMACHAIN.; CALCIUM/CALMODULIN-DEPENDENT PROTEIN KINASE II GAMMA ISOFORM 4.; ISOFORM 3 OF CALCIUM/CALMODULIN-DEPENDENT PROTEIN KINASE TYPE II GAMMACHAIN.; CALCIUM/CALMODULIN-DEPENDENT PROTEIN KINASE (CAM KINASE) II GAMMA.                                                                                                                                                                                                     | AGAYDFPSPEWDTVTPEAK<br>DLKPENLLLASK<br>DLKPENLLLASK<br>FTDDYQLFEELGK<br>FYFENLLSK<br>NLINQMLTINPAK | K<br>R<br>R<br>R<br>K<br>K | N<br>C<br>C<br>G<br>N<br>R | 95.00%<br>95.00%<br>95.00%<br>95.00%<br>95.00%<br>95.00% | 73<br>48<br>41<br>70<br>45<br>42 | M6: Oxidation                    | 1040.9880<br>670.8962<br>447.5987<br>802.8852<br>580.8054<br>743.4136 | 2<br>2<br>3<br>2<br>2<br>2 | 8.3<br>4.1<br>0.9<br>8.7<br>3.2<br>6.2 | 228<br>136<br>136<br>10<br>448<br>247 | 246<br>147<br>147<br>22<br>456<br>259  | Yes<br>Yes<br>Yes<br>No<br>No<br>Yes  |
| 836 | IPI00172636; IPI00430291; IPI00827573; IPI00827606; IPI00827625; IPI00827717; IPI00828081; IPI00828139; IPI00828178 | CAMK2D | ISOFORM DELTA 6 OF CALCIUM/CALMODULIN-DEPENDENT PROTEIN KINASE TYPE IIDELTA CHAIN.; ISOFORM DELTA 2 OF CALCIUM/CALMODULIN-DEPENDENT PROTEIN KINASE TYPE IIDELTA CHAIN.; ISOFORM DELTA 10 OF CALCIUM/CALMODULIN-DEPENDENT PROTEIN KINASE TYPEII DELTA CHAIN.; ISOFORM DELTA 7 OF CALCIUM/CALMODULIN-DEPENDENT PROTEIN KINASE TYPE IIDELTA CHAIN.; ISOFORM DELTA 11 OF CALCIUM/CALMODULIN-DEPENDENT PROTEIN KINASE TYPEII DELTA CHAIN.; ISOFORM DELTA 3 OF CALCIUM/CALMODULIN-DEPENDENT PROTEIN KINASE TYPE IIDELTA CHAIN.; ISOFORM DELTA 4 OF CALCIUM/CALMODULIN-DEPENDENT PROTEIN KINASE TYPE IIDELTA CHAIN.; ISOFORM DELTA 8 OF CALCIUM/CALMODULIN-DEPENDENT PROTEIN KINASE TYPE IIDELTA CHAIN.; ISOFORM DELTA 9 OF CALCIUM/CALMODULIN-DEPENDENT PROTEIN KINASE TYPE IIDELTA CHAIN. | AGAYDFPSPEWDTVTPEAK<br>DLKPENLLLASK<br>DLKPENLLLASK<br>FTDEYQLFEELGK<br>FYFENALSK<br>LTQYMDGSGMPK  | K<br>R<br>R<br>R<br>R<br>R | D<br>S<br>S<br>G<br>S<br>T | 95.00%<br>95.00%<br>95.00%<br>95.00%<br>95.00%<br>95.00% | 73<br>48<br>41<br>99<br>42<br>46 | M5: Oxidation,<br>M10: Oxidation | 1040.9880<br>670.8962<br>447.5987<br>809.8925<br>559.7841<br>680.3040 | 2<br>2<br>3<br>2<br>2<br>2 | 8.3<br>4.1<br>0.9<br>7.9<br>7.2<br>5.5 | 228<br>136<br>136<br>10<br>397<br>434 | 246<br>147<br>147<br>22<br>405<br>445  | Yes<br>No<br>No<br>No<br>No<br>No     |

|     |                                                    |         |                                                                                                                                                                            |                        |   |        |        |     |                                       |   |     |     |     |     |
|-----|----------------------------------------------------|---------|----------------------------------------------------------------------------------------------------------------------------------------------------------------------------|------------------------|---|--------|--------|-----|---------------------------------------|---|-----|-----|-----|-----|
|     |                                                    |         | VTEQLIEAINNGDFEAYTK                                                                                                                                                        | K                      | I | 95.00% | 102    |     | 1078.0420                             | 2 | 9.6 | 353 | 371 | No  |
| 837 | IPI00179057; IPI00480142; IPI00643885; IPI00644450 | CUL4B   | ISOFORM 1 OF CULLIN-4B.; ISOFORM 2 OF CULLIN-4B.; 103 KDA PROTEIN.; 28 KDA PROTEIN.                                                                                        | SIFLFLDR               | R | T      | 95.00% | 30  | 505.7908                              | 2 | 6.1 | 287 | 294 | No  |
|     |                                                    |         |                                                                                                                                                                            | TIDGILLIER             | K | E      | 95.00% | 50  | 628.3891                              | 2 | 5.9 | 328 | 338 | No  |
| 838 | IPI00179415; IPI00747748                           | PPP3CA  | ISOFORM 1 OF SERINE/THREONINE-PROTEIN PHOSPHATASE 2B CATALYTIC SUBUNITALPHA ISOFORM.; ISOFORM 2 OF SERINE/THREONINE-PROTEIN PHOSPHATASE 2B CATALYTIC SUBUNITALPHA ISOFORM. | GLTPTGMLPSGVLGGK       | K | Q      | 95.00% | 76  | M7: Oxidation 794.4314                | 2 | 8.2 | 425 | 441 | No  |
|     |                                                    |         |                                                                                                                                                                            | IITEGASILR             | R | Q      | 95.00% | 55  | 536.8243                              | 2 | 3.8 | 64  | 73  | No  |
|     |                                                    |         |                                                                                                                                                                            | LFEVGGSPANTR           | K | Y      | 95.00% | 69  | 624.3240                              | 2 | 1.5 | 101 | 112 | Yes |
| 839 | IPI00180675                                        | TUBA1A  | TUBULIN ALPHA-3 CHAIN.                                                                                                                                                     | AFVHWYVYEGMEGEFSEAR    | R | E      | 95.00% | 47  | M11: Oxidation 782.6827               | 3 | 8.1 | 403 | 422 | Yes |
|     |                                                    |         |                                                                                                                                                                            | AVFVDLEPTVIDEVR        | R | T      | 95.00% | 84  | 851.4623                              | 2 | 6.1 | 65  | 79  | No  |
|     |                                                    |         |                                                                                                                                                                            | AVFVDLEPTVIDEVR        | R | T      | 95.00% | 81  | 567.9778                              | 3 | 6.8 | 65  | 79  | Yes |
|     |                                                    |         |                                                                                                                                                                            | DVNAAIATIK             | K | T      | 95.00% | 36  | 1015.5870                             | 1 | 7.7 | 327 | 336 | No  |
|     |                                                    |         |                                                                                                                                                                            | DVNAAIATIK             | K | T      | 95.00% | 73  | 508.2952                              | 2 | 3.6 | 327 | 336 | Yes |
|     |                                                    |         |                                                                                                                                                                            | EIIDLVLDLDR            | K | I      | 95.00% | 64  | 543.3175                              | 2 | 5.7 | 113 | 121 | Yes |
|     |                                                    |         |                                                                                                                                                                            | FDGALNVLDLTFEQTNLVPYPR | R | I      | 95.00% | 128 | 1205.1200                             | 2 | 9.5 | 244 | 264 | Yes |
|     |                                                    |         |                                                                                                                                                                            | FDGALNVLDLTFEQTNLVPYPR | R | I      | 95.00% | 64  | 803.7485                              | 3 | 8.6 | 244 | 264 | Yes |
|     |                                                    |         |                                                                                                                                                                            | IHFPLATYAPVISAEK       | R | A      | 95.00% | 94  | 878.9923                              | 2 | 7.4 | 265 | 280 | Yes |
|     |                                                    |         |                                                                                                                                                                            | IHFPLATYAPVISAEK       | R | A      | 95.00% | 78  | 586.3296                              | 3 | 5.4 | 265 | 280 | Yes |
|     |                                                    |         |                                                                                                                                                                            | LDHKFDLMYAK            | R | R      | 95.00% | 38  | M8: Oxidation 698.8528                | 2 | 3.0 | 391 | 401 | Yes |
|     |                                                    |         |                                                                                                                                                                            | LIGQIVSSITASLR         | R | F      | 95.00% | 102 | 729.4421                              | 2 | 4.9 | 230 | 243 | No  |
|     |                                                    |         |                                                                                                                                                                            | NLDIERPTYTNLNR         | R | L      | 95.00% | 60  | 859.9495                              | 2 | 4.9 | 216 | 229 | Yes |
|     |                                                    |         |                                                                                                                                                                            | NLDIERPTYTNLNR         | R | L      | 95.00% | 50  | 573.6350                              | 3 | 3.9 | 216 | 229 | Yes |
|     |                                                    |         |                                                                                                                                                                            | QLFHPEQLITGK           | R | E      | 95.00% | 45  | 705.8943                              | 2 | 4.2 | 85  | 96  | Yes |
|     |                                                    |         |                                                                                                                                                                            | QLFHPEQLITGK           | R | E      | 95.00% | 40  | 470.9325                              | 3 | 4.9 | 85  | 96  | Yes |
|     |                                                    |         |                                                                                                                                                                            | QLFHPEQLITGKEDAANNYAR  | R | G      | 95.00% | 73  | 805.7444                              | 3 | 5.1 | 85  | 105 | Yes |
|     |                                                    |         |                                                                                                                                                                            | TIGGGDDSFNTFFSETGAGK   | K | H      | 95.00% | 105 | 1004.4600                             | 2 | 8.9 | 41  | 60  | No  |
|     |                                                    |         |                                                                                                                                                                            | VGINYQPPTVPGGDLAK      | K | V      | 95.00% | 84  | 912.9996                              | 2 | 2.8 | 353 | 370 | Yes |
| 840 | IPI00181231; IPI00783302                           | PTCD3   | 79 KDA PROTEIN.; PENTATRICOPEPTIDE REPEAT DOMAIN 3.                                                                                                                        | SELLNELMSDAK           | R | V      | 95.00% | 48  | M8: Oxidation 683.3356                | 2 | 4.6 | 608 | 619 | No  |
|     |                                                    |         |                                                                                                                                                                            | VAVLQALASTVNR          | K | D      | 95.00% | 81  | 671.4022                              | 2 | 8.4 | 68  | 80  | No  |
|     |                                                    |         |                                                                                                                                                                            | VEGTDVTGIEEVIPK        | K | K      | 95.00% | 119 | 842.9621                              | 2 | 9.0 | 46  | 61  | No  |
| 841 | IPI00185374; IPI00335069; IPI00787055              | PSMD12  | 26S PROTEASOME NON-ATPASE REGULATORY SUBUNIT 12.; SIMILAR TO PROTEASOME 26S NON-ATPASE SUBUNIT 12 ISOFORM 2.; SIMILAR TO 26S PROTEASOME NON-ATPASE REGULATORY SUBUNIT 12.  | DPNNLLNDWSQK           | K | L      | 95.00% | 67  | 722.3518                              | 2 | 6.1 | 420 | 431 | No  |
|     |                                                    |         |                                                                                                                                                                            | LAGIINFQR              | R | P      | 95.00% | 48  | 516.3056                              | 2 | 3.0 | 409 | 417 | No  |
|     |                                                    |         |                                                                                                                                                                            | LAGIINFQRPK            | R | D      | 95.00% | 33  | 628.8805                              | 2 | 4.1 | 409 | 419 | No  |
|     |                                                    |         |                                                                                                                                                                            | LFTTMELMR              | K | W      | 95.00% | 45  | M5: Oxidation, M8: Oxidation 587.2888 | 2 | 4.2 | 308 | 316 | No  |
|     |                                                    |         |                                                                                                                                                                            | LNSLMSLVNK             | K | T      | 95.00% | 34  | M5: Oxidation 567.8156                | 2 | 3.7 | 432 | 441 | No  |
|     |                                                    |         |                                                                                                                                                                            | LQEVIELLSLEK           | R | Q      | 95.00% | 58  | 757.9434                              | 2 | 6.9 | 40  | 52  | No  |
|     |                                                    |         |                                                                                                                                                                            | VEFILEQMR              | R | L      | 95.00% | 75  | M8: Oxidation 590.8077                | 2 | 3.4 | 183 | 191 | No  |
| 842 | IPI00216003                                        | CUL5    | CULLIN HOMOLOG 5.                                                                                                                                                          | WSTLVEDYGMELR          | R | K      | 95.00% | 82  | M10: Oxidation 807.8840               | 2 | 7.8 | 317 | 329 | No  |
|     |                                                    |         |                                                                                                                                                                            | AVVNDATIFK             | K | L      | 95.00% | 39  | 539.3030                              | 2 | 3.3 | 432 | 441 | No  |
|     |                                                    |         |                                                                                                                                                                            | IHQALKEDILEFIK         | K | Q      | 95.00% | 58  | 566.3286                              | 3 | 3.6 | 118 | 131 | No  |
|     |                                                    |         |                                                                                                                                                                            | ISNAQLQTELVEILK        | K | N      | 95.00% | 93  | 849.9925                              | 2 | 7.6 | 786 | 800 | No  |
|     |                                                    |         |                                                                                                                                                                            | LATELPDAELRR           | K | T      | 95.00% | 31  | 461.9264                              | 3 | 2.8 | 678 | 689 | No  |
|     |                                                    |         |                                                                                                                                                                            | QVLLYEPQVNSPK          | R | D      | 95.00% | 52  | 757.9156                              | 2 | 0.9 | 703 | 715 | No  |
|     |                                                    |         |                                                                                                                                                                            | TLWSLVAFPK             | R | L      | 95.00% | 43  | 581.3409                              | 2 | 5.8 | 690 | 699 | No  |
|     |                                                    |         |                                                                                                                                                                            | VFVSLPTELEDLIPEVEEFYKK | K | N      | 95.00% | 41  | 875.4703                              | 3 | 7.6 | 600 | 621 | No  |
|     |                                                    |         |                                                                                                                                                                            | VSEDLNQAFK             | K | E      | 95.00% | 49  | 575.7922                              | 2 | 1.7 | 559 | 568 | No  |
|     |                                                    |         |                                                                                                                                                                            | YVEQLLTLFNR            | K | F      | 95.00% | 79  | 698.3899                              | 2 | 6.0 | 397 | 407 | No  |
| 843 | IPI00216470                                        | PIP5K2B | ISOFORM 1 OF PHOSPHATIDYLINOSITOL-4-PHOSPHATE 5-KINASE TYPE-2 BETA.                                                                                                        | DVEFLAQLK              | R | I      | 95.00% | 57  | 531.7991                              | 2 | 6.2 | 267 | 275 | No  |
| 844 | IPI00216694                                        | PLS3    | PLASTIN 3.                                                                                                                                                                 | FGIDDQDYQNSVTR         | R | S      | 95.00% | 77  | 829.3807                              | 2 | 4.6 | 110 | 123 | No  |
|     |                                                    |         |                                                                                                                                                                            | LSPEELLRL              | K | W      | 95.00% | 59  | 535.3174                              | 2 | 1.0 | 267 | 275 | No  |
|     |                                                    |         |                                                                                                                                                                            | MINLSVPDTIDER          | K | A      | 95.00% | 44  | M1: Oxidation 759.8835                | 2 | 7.6 | 169 | 181 | No  |
| 845 | IPI00216951                                        | DARS    | ASPARTYL-TRNA SYNTHETASE, CYTOPLASMIC.                                                                                                                                     | ESIVDVEGVVR            | K | K      | 95.00% | 41  | 601.3300                              | 2 | 7.7 | 111 | 121 | No  |
|     |                                                    |         |                                                                                                                                                                            | IYVISLAEPR             | K | L      | 95.00% | 35  | 580.8411                              | 2 | 5.5 | 142 | 151 | No  |
|     |                                                    |         |                                                                                                                                                                            | LPLQLDDAVRPEAGEEEGR    | R | A      | 95.00% | 34  | 741.7048                              | 3 | 4.2 | 152 | 171 | No  |

|     |                                                    |           |                                                                                                                                                              |                                                                                                                                                                                                                    |                                                     |                                                |                                                                                                            |                                                    |                                                                      |                                                                                                           |                                           |                                                             |                                                           |                                                                |                                                    |
|-----|----------------------------------------------------|-----------|--------------------------------------------------------------------------------------------------------------------------------------------------------------|--------------------------------------------------------------------------------------------------------------------------------------------------------------------------------------------------------------------|-----------------------------------------------------|------------------------------------------------|------------------------------------------------------------------------------------------------------------|----------------------------------------------------|----------------------------------------------------------------------|-----------------------------------------------------------------------------------------------------------|-------------------------------------------|-------------------------------------------------------------|-----------------------------------------------------------|----------------------------------------------------------------|----------------------------------------------------|
| 846 | IPI00218015; IPI00329133                           | LDHD      | ISOFORM 2 OF PROBABLE D-LACTATE DEHYDROGENASE, MITOCHONDRIALPRECURSOR.; ISOFORM 1 OF PROBABLE D-LACTATE DEHYDROGENASE, MITOCHONDRIALPRECURSOR.               | AVLDPQGLMNP GK<br>DNVLNLEVLDPGR                                                                                                                                                                                    | K<br>R                                              | V<br>L                                         | 95.00%<br>95.00%                                                                                           | 75<br>70                                           | M9: Oxidation                                                        | 678.3566<br>776.9277                                                                                      | 2<br>2                                    | 4.2<br>8.9                                                  | 470<br>185                                                | 482<br>198                                                     | No<br>No                                           |
| 847 | IPI00218971; IPI00788806; IPI00790255; IPI00794806 | PPM2C     | [PYRUVATE DEHYDROGENASE [LIPOAMIDE]]-PHOSPHATASE 1, MITOCHONDRIALPRECURSOR.; PYRUVATE DEHYDROGENASE PHOSPHATASE PRECURSOR.; 65 KDA PROTEIN.; 67 KDA PROTEIN. | HAVGNNEFGTV DHER<br>MLSLPEELAR<br>MSSVFEDQNAATHLIR<br>VIESGPDQLNDNEYTK                                                                                                                                             | R<br>K<br>K<br>R                                    | L<br>M<br>H<br>F                               | 95.00%<br>95.00%<br>95.00%<br>95.00%                                                                       | 56<br>38<br>40<br>124                              | M1: Oxidation<br>M1: Oxidation                                       | 561.2633<br>587.8137<br>612.2993<br>911.4344                                                              | 3<br>2<br>3<br>2                          | 3.6<br>4.4<br>3.4<br>5.6                                    | 485<br>503<br>469<br>368                                  | 499<br>512<br>484<br>383                                       | No<br>No<br>No<br>No                               |
| 848 | IPI00219575; IPI00794082                           | BLMH      | BLEOMYCIN HYDROLASE.; 32 KDA PROTEIN.                                                                                                                        | GEISATQDVMMEIFR<br>IGPITPLEFYR<br>TLYNNQPIDFLK                                                                                                                                                                     | K<br>K<br>K                                         | V<br>E<br>K                                    | 95.00%<br>95.00%<br>95.00%                                                                                 | 82<br>42<br>60                                     | M10: Oxidation,<br>M11: Oxidation                                    | 944.4323<br>653.3694<br>733.3904                                                                          | 2<br>2<br>2                               | 5.2<br>7.8<br>2.5                                           | 27<br>245<br>298                                          | 42<br>255<br>309                                               | No<br>No<br>No                                     |
| 849 | IPI00219613; IPI00787827                           | PITRM1    | ISOFORM 1 OF PRESEQUENCE PROTEASE, MITOCHONDRIAL PRECURSOR.; ISOFORM 2 OF PRESEQUENCE PROTEASE, MITOCHONDRIAL PRECURSOR.                                     | EDTNNLFSVQFR<br>MTAQELANGIPDSGHLYASIR                                                                                                                                                                              | R<br>K                                              | T<br>A                                         | 95.00%<br>95.00%                                                                                           | 44<br>45                                           | M1: Oxidation                                                        | 735.3607<br>754.0452                                                                                      | 2<br>3                                    | 7.5<br>7.3                                                  | 82<br>706                                                 | 93<br>726                                                      | No<br>No                                           |
| 850 | IPI00220150                                        | IDH3G     | ISOCITRATE DEHYDROGENASE [NAD] SUBUNIT GAMMA, MITOCHONDRIAL PRECURSOR.                                                                                       | AVLASMDNENMHTPDIGGQGT<br>SEAIQDVIR<br>ENTEGEYSSLEHESVAGVVE<br>SLK<br>HKDIDILIVR                                                                                                                                    | K<br>R<br>R                                         | H<br>I<br>E                                    | 95.00%<br>95.00%<br>95.00%                                                                                 | 92<br>59<br>46                                     | M6: Oxidation,<br>M11: Oxidation                                     | 1101.5240<br>831.7319<br>407.9170                                                                         | 3<br>3<br>3                               | 8.8<br>6.9<br>2.6                                           | 351<br>168<br>158                                         | 381<br>190<br>167                                              | No<br>No<br>No                                     |
| 851 | IPI00220396                                        | PHKG1     | PFKFB2 PROTEIN.                                                                                                                                              | HTVTMPGDGIGPELMLHV<br>K<br>DLKPENILDDNMNIK<br>DLKPENILDDNMNIK<br>LIDAYAFR<br>VIDVTGGGFSPEEVR<br>YTAEEALAHPPFQQYLVVEVR                                                                                              | R<br>R<br>R<br>R<br>R<br>K<br>R                     | S<br>L<br>L<br>I<br>E<br>H                     | 95.00%<br>95.00%<br>95.00%<br>95.00%<br>95.00%<br>95.00%<br>95.00%                                         | 39<br>62<br>31<br>51<br>107<br>83                  | M5: Oxidation,<br>M16: Oxidation<br>M13: Oxidation<br>M13: Oxidation | 726.3787<br>950.9925<br>634.3328<br>484.7658<br>824.9194<br>847.4275                                      | 3<br>2<br>3<br>2<br>2<br>3                | 4.8<br>4.2<br>7.2<br>3.3<br>7.6<br>8.4                      | 55<br>153<br>168<br>349<br>50<br>280                      | 74<br>168<br>168<br>356<br>65<br>300                           | No<br>No<br>No<br>No<br>No<br>No                   |
| 852 | IPI00220637; IPI00514587                           | SARS      | SERYL-TRNA SYNTHETASE, CYTOPLASMIC.; SERYL-TRNA SYNTHETASE.                                                                                                  | EIGNLLHPSVPSINDEDVDNKVE<br>R<br>LLIDEAILK<br>VLDLDFLR                                                                                                                                                              | R<br>R<br>M                                         | I<br>C<br>V                                    | 95.00%<br>95.00%<br>95.00%                                                                                 | 82<br>36<br>62                                     |                                                                      | 897.1276<br>514.3273<br>495.7872                                                                          | 3<br>2<br>2                               | 8.8<br>5.9<br>4.1                                           | 134<br>108<br>2                                           | 157<br>116<br>9                                                | No<br>No<br>No                                     |
| 853 | IPI00249656                                        | LOC347273 | HYPOTHETICAL PROTEIN LOC347273.                                                                                                                              | SVQIDLLK<br>YASIVDSVQASQK                                                                                                                                                                                          | K<br>K                                              | L<br>R                                         | 95.00%<br>95.00%                                                                                           | 37<br>63                                           |                                                                      | 458.2825<br>666.3639                                                                                      | 2<br>2                                    | 6.1<br>2.2                                                  | 67<br>40                                                  | 74<br>52                                                       | No<br>No                                           |
| 854 | IPI00257508                                        | DPYSL2    | DIHYDROPYRIMIDINASE-RELATED PROTEIN 2.                                                                                                                       | DIGAIAQVHAENGDIIEEQQR<br>GSPLVVISQGK<br>ILDLGITGPEGHVLSRPEEVEAE<br>AVNR<br>ILDLGITGPEGHVLSRPEEVEAE<br>AVNR<br>IVLEDGTLHVTEGSGR<br>IVLEDGTLHVTEGSGR<br>IVNDQSFYADIYMEDGLIK<br>NLHQSGFSLSGAQIDDNIPR<br>QIGENLIVPGGVK | R<br>R<br>R<br>R<br>R<br>K<br>K<br>K<br>K<br>R<br>K | I<br>I<br>I<br>A<br>A<br>Y<br>Y<br>Q<br>R<br>T | 95.00%<br>95.00%<br>95.00%<br>95.00%<br>95.00%<br>95.00%<br>95.00%<br>95.00%<br>95.00%<br>95.00%<br>95.00% | 55<br>48<br>46<br>35<br>82<br>42<br>99<br>44<br>47 | M14: Oxidation                                                       | 793.0644<br>542.8240<br>967.5173<br>725.8868<br>841.9437<br>561.6316<br>1183.0590<br>723.6973<br>662.3886 | 3<br>2<br>3<br>4<br>2<br>3<br>2<br>3<br>2 | 1.1<br>3.0<br>8.3<br>4.1<br>4.8<br>4.6<br>7.9<br>3.4<br>4.2 | 190<br>441<br>212<br>212<br>452<br>467<br>24<br>533<br>44 | 211<br>451<br>238<br>238<br>467<br>No<br>No<br>43<br>552<br>56 | No<br>No<br>No<br>No<br>No<br>No<br>No<br>No<br>No |
| 855 | IPI00291016                                        | NDUFV3    | NADH-UBIQUINONE OXIDOREDUCTASE FLAVOPROTEIN 3 ISOFORM A PRECURSOR.                                                                                           | GSPAPAVLAEAR<br>TLLQKPHVDITDPEKPHQPK                                                                                                                                                                               | K<br>K                                              | A<br>A                                         | 95.00%<br>95.00%                                                                                           | 35<br>29                                           |                                                                      | 634.3391<br>581.0749                                                                                      | 2<br>4                                    | 4.5<br>6.0                                                  | 305<br>209                                                | 317<br>228                                                     | No<br>No                                           |
| 856 | IPI00291262; IPI00400826; IPI00795633              | CLU       | CLUSTERIN PRECURSOR.; CLUSTERIN ISOFORM 1.; 52 KDA PROTEIN.                                                                                                  | ASSIIDELFQDR<br>ELDESQVAER<br>VTTVASHTSDSDVPSGVTEVV<br>K                                                                                                                                                           | R<br>R<br>R                                         | F<br>L<br>L                                    | 95.00%<br>95.00%<br>95.00%                                                                                 | 86<br>51<br>46                                     |                                                                      | 697.3569<br>644.8249<br>772.0686                                                                          | 2<br>2<br>3                               | 6.8<br>2.7<br>5.5                                           | 183<br>326<br>386                                         | 194<br>336<br>408                                              | No<br>No<br>No                                     |
| 857 | IPI00291510                                        | IMPDH2    | INOSINE-5'-MONOPHOSPHATE DEHYDROGENASE 2.                                                                                                                    | DKYPNLQOVIGNVVTAQAQ<br>KGLPIVNEDELVAIAR<br>KYEQGFITDPVVLSPK<br>KYEQGFITDPVVLSPK<br>LPIVNEDELVAIAR<br>NLIDAGVDALR                                                                                                   | K<br>K<br>K<br>K<br>K<br>K                          | N<br>T<br>D<br>D<br>T<br>V                     | 95.00%<br>95.00%<br>95.00%<br>95.00%<br>95.00%<br>95.00%                                                   | 65<br>43<br>108<br>29<br>78<br>62                  |                                                                      | 696.0538<br>655.7095<br>910.9993<br>607.6675<br>890.5043<br>578.8222                                      | 3<br>3<br>2<br>3<br>2<br>2                | 7.7<br>5.4<br>5.8<br>3.8<br>8.4<br>3.3                      | 292<br>207<br>109<br>109<br>209<br>312                    | 311<br>224<br>124<br>124<br>224<br>322                         | No<br>No<br>No<br>No<br>No<br>No                   |



|     |                                                                    |                                             |                                                                                                                                                                                                                                                                                                                         |                                                                                                                                                                                                                                   |                                                                              |                                                                             |                                                                                                                                                    |                                                                                            |                                                         |                                                                                                                                                                                       |                                                                             |                                                                                                           |                                                                                                      |                                                                                                       |                                                                                                      |
|-----|--------------------------------------------------------------------|---------------------------------------------|-------------------------------------------------------------------------------------------------------------------------------------------------------------------------------------------------------------------------------------------------------------------------------------------------------------------------|-----------------------------------------------------------------------------------------------------------------------------------------------------------------------------------------------------------------------------------|------------------------------------------------------------------------------|-----------------------------------------------------------------------------|----------------------------------------------------------------------------------------------------------------------------------------------------|--------------------------------------------------------------------------------------------|---------------------------------------------------------|---------------------------------------------------------------------------------------------------------------------------------------------------------------------------------------|-----------------------------------------------------------------------------|-----------------------------------------------------------------------------------------------------------|------------------------------------------------------------------------------------------------------|-------------------------------------------------------------------------------------------------------|------------------------------------------------------------------------------------------------------|
| 870 | IPI00304803                                                        | GMPR                                        | GMP REDUCTASE 1.                                                                                                                                                                                                                                                                                                        | FGYHFTQQGPR<br>SGDPIANAVADMLR<br>YKVPVDEPPNPTNIEILKR<br>YKVPVDEPPNPTNIEILKR<br>YRDIDEDEILR<br>YRDIDEDEILR<br>GDVENTILDILGGLR<br>MTSILEAVPQVK<br>TVEVPYKGDVENTILDILGGLR                                                            | R<br>R<br>K<br>K<br>K<br>K<br>K<br>K<br>K                                    | A<br>E<br>V<br>V<br>T<br>T<br>S<br>F<br>S                                   | 95.00%<br>95.00%<br>95.00%<br>95.00%<br>95.00%<br>95.00%<br>95.00%<br>95.00%                                                                       | 43<br>58<br>60<br>35<br>44<br>55<br>90<br>63<br>59                                         | M12: Oxidation<br><br><br><br><br><br><br>M1: Oxidation | 669.3275<br>723.3607<br>783.7595<br>588.0694<br>718.8576<br>479.5743<br>792.9401<br>666.3705<br>801.1094                                                                              | 2<br>2<br>3<br>4<br>2<br>3<br>2<br>2<br>3                                   | 5.9<br>5.2<br>7.3<br>3.6<br>3.5<br>3.4<br>7.7<br>6.6<br>6.0                                               | 315<br>236<br>170<br>170<br>11<br>11<br>299<br>113<br>292                                            | 325<br>249<br>189<br>189<br>21<br>21<br>313<br>124<br>313                                             | No<br>No<br>No<br>No<br>No<br>No<br>No<br>No<br>No                                                   |
| 871 | IPI00329600; IPI00641681                                           | SCCPDH                                      | PROBABLE SACCHAROPINE DEHYDROGENASE.;<br>SACCHAROPINE DEHYDROGENASE.                                                                                                                                                                                                                                                    | GYSIPFMGSDVSVVR<br>NVSNLKPVPLIGPK<br>SAIYFGDQSNLR                                                                                                                                                                                 | K<br>R<br>K                                                                  | R<br>L<br>K                                                                 | 95.00%<br>95.00%<br>95.00%                                                                                                                         | 55<br>47<br>64                                                                             | M7: Oxidation                                           | 815.4083<br>738.4546<br>714.3539                                                                                                                                                      | 2<br>2<br>2                                                                 | 8.7<br>4.2<br>5.6                                                                                         | 74<br>215<br>199                                                                                     | 88<br>228<br>211                                                                                      | No<br>No<br>No                                                                                       |
| 872 | IPI00329633                                                        | TARS                                        | THREONYL-TRNA SYNTHETASE, CYTOPLASMIC.                                                                                                                                                                                                                                                                                  | GAYIYNALIEFIR<br>IYGISFPDPK                                                                                                                                                                                                       | K<br>R                                                                       | S<br>M                                                                      | 95.00%<br>95.00%                                                                                                                                   | 49<br>44                                                                                   |                                                         | 771.9263<br>568.8062                                                                                                                                                                  | 2<br>2                                                                      | 8.3<br>4.6                                                                                                | 349<br>297                                                                                           | 361<br>306                                                                                            | No<br>No                                                                                             |
| 873 | IPI00329653; IPI00384529; IPI00807589;<br>IPI00807621; IPI00807645 | COBL                                        | ISOFORM 5 OF PROTEIN CORDON-BLEU.;<br>ISOFORM 1 OF PROTEIN CORDON-BLEU.;<br>ISOFORM 2 OF PROTEIN CORDON-BLEU.;<br>ISOFORM 3 OF PROTEIN CORDON-BLEU.;<br>ISOFORM 4 OF PROTEIN CORDON-BLEU.                                                                                                                               | DNIAGEELELSK<br>SLTLGSPSLGSGISGVSK<br>VSLGSQIDLQK                                                                                                                                                                                 | R<br>R<br>K                                                                  | S<br>S<br>K                                                                 | 95.00%<br>95.00%<br>95.00%                                                                                                                         | 73<br>76<br>65                                                                             |                                                         | 659.3334<br>901.5266<br>594.3372                                                                                                                                                      | 2<br>2<br>2                                                                 | 3.8<br>9.9<br>2.5                                                                                         | 200<br>276<br>320                                                                                    | 211<br>294<br>330                                                                                     | No<br>No<br>No                                                                                       |
| 874 | IPI00333619; IPI00394758                                           | ALDH3A2                                     | ISOFORM 1 OF FATTY ALDEHYDE<br>DEHYDROGENASE.; ISOFORM 2 OF FATTY<br>ALDEHYDE DEHYDROGENASE.                                                                                                                                                                                                                            | EFYGENIKESPDYER<br>FDHIFYTGNTAVGK<br>IAFGGETDEATR<br>NVDEAINFINER<br>VMQEEIFGPILPIVPVK<br>VMQEEIFGPILPIVPVK<br>YIAPTVLTDVDPK                                                                                                      | K<br>R<br>K<br>K<br>K<br>K<br>R                                              | I<br>I<br>Y<br>E<br>N<br>N<br>T                                             | 95.00%<br>95.00%<br>95.00%<br>95.00%<br>95.00%<br>95.00%<br>95.00%                                                                                 | 47<br>42<br>64<br>90<br>44<br>26<br>52                                                     | M2: Oxidation<br>M2: Oxidation                          | 938.4245<br>785.3921<br>633.8037<br>717.3589<br>963.0504<br>642.3692<br>716.3961                                                                                                      | 2<br>2<br>2<br>2<br>2<br>3<br>2                                             | 0.5<br>3.9<br>2.2<br>5.3<br>5.5<br>4.9<br>7.4                                                             | 267<br>178<br>300<br>344<br>327<br>327<br>312                                                        | 281<br>191<br>311<br>355<br>343<br>343<br>324                                                         | No<br>No<br>No<br>No<br>No<br>No<br>No                                                               |
| 875 | IPI00383947                                                        | KBTBD5                                      | ISOFORM 1 OF KELCH REPEAT AND BTB DOMAIN-<br>CONTAINING PROTEIN 5.                                                                                                                                                                                                                                                      | EIAYAAGATFLPVR<br>ILPGILNDTLR<br>WAPFEAFPQER                                                                                                                                                                                      | R<br>R<br>K                                                                  | L<br>F<br>S                                                                 | 95.00%<br>95.00%<br>95.00%                                                                                                                         | 70<br>32<br>34                                                                             |                                                         | 739.9085<br>612.8747<br>689.3383                                                                                                                                                      | 2<br>2<br>2                                                                 | 5.7<br>7.9<br>6.9                                                                                         | 599<br>301<br>537                                                                                    | 612<br>311<br>547                                                                                     | No<br>No<br>No                                                                                       |
| 876 | IPI00396485; IPI00472724                                           | EEF1A1                                      | ELONGATION FACTOR 1-ALPHA 1.; EUKARYOTIC<br>TRANSLATION ELONGATION FACTOR 1 ALPHA-<br>LIKE 3.                                                                                                                                                                                                                           | EHALLAYTLGVK<br>EHALLAYTLGVK<br>IGGIGTVPVGR<br>IGGIGTVPVGR<br>LPLQDVYK<br>LPLQDVYK<br>QLIVGVNK<br>QLIVGVNK<br>QTVAVGVK<br>QTVAVGVK<br>STTTGHLIYK<br>THINIVVIGHVDSGK<br>VETGVLPKGMVVFAPVNVTE<br>VK<br>YYVTIIDAPGHR<br>YYVTIIDAPGHR | R<br>R<br>K<br>K<br>R<br>R<br>K<br>K<br>R<br>R<br>K<br>K<br>R<br>K<br>K<br>K | Q<br>Q<br>V<br>V<br>I<br>I<br>M<br>M<br>A<br>A<br>C<br>S<br><br>S<br>D<br>D | 95.00%<br>95.00%<br>95.00%<br>95.00%<br>95.00%<br>95.00%<br>95.00%<br>95.00%<br>95.00%<br>95.00%<br>95.00%<br>95.00%<br>95.00%<br>95.00%<br>95.00% | 74<br>44<br>35<br>90<br>39<br>61<br>42<br>37<br>38<br>43<br>53<br>58<br><br>39<br>32<br>60 | M10: Oxidation                                          | 657.8776<br>438.9206<br>1025.6170<br>513.3107<br>975.5573<br>488.2806<br>870.5441<br>435.7753<br>914.5709<br>457.7881<br>560.8058<br>530.3015<br><br>844.4707<br>702.8706<br>468.9156 | 2<br>3<br>1<br>2<br>1<br>2<br>1<br>2<br>1<br>2<br>2<br>3<br><br>3<br>2<br>3 | 3.8<br>3.1<br>5.6<br>2.6<br>5.8<br>1.8<br>3.1<br>1.6<br>3.7<br>0.9<br>3.1<br>4.8<br><br>6.8<br>4.1<br>2.6 | 135<br>135<br>256<br>266<br>248<br>248<br>147<br>147<br>431<br>431<br>21<br>6<br><br>267<br>85<br>85 | 146<br>146<br>266<br>266<br>255<br>255<br>154<br>154<br>439<br>439<br>30<br>20<br><br>290<br>96<br>96 | Yes<br>Yes<br>Yes<br>Yes<br>Yes<br>Yes<br>Yes<br>Yes<br>No<br>No<br>Yes<br>Yes<br><br>No<br>No<br>No |
| 877 | IPI00399036; IPI00411639; IPI00413108;<br>IPI00553164; IPI00790580 | LOC388524;<br>RPSA; RPSAP15;<br>hCG_1984468 | SIMILAR TO 40S RIBOSOMAL PROTEIN SA (P40)<br>(34/67 KDA LAMININ RECEPTOR)(COLON<br>CARCINOMA LAMININ-BINDING PROTEIN)<br>(NEM/1CHD4) (MULTIDRUGRESISTANCE-<br>ASSOCIATED PROTEIN MGR1-AG) ISOFORM 1.;<br>LAMININ RECEPTOR-LIKE PROTEIN LAMRL5.;<br>RIBOSOMAL PROTEIN SA.; 40S RIBOSOMAL<br>PROTEIN SA.; 16 KDA PROTEIN. | AIVAIENPADVSVISSR<br>FAAATGATPIAGR<br>FLAAGTHLGGTNLDFQMEQYIYK<br>FTPGFTFNQIAAFR<br>KSDGIYIINLK<br>SDGIYIINLK                                                                                                                      | R<br>K<br>K<br>R<br>R<br>R<br>K                                              | N<br>F<br>R<br>E<br>R<br>R                                                  | 95.00%<br>95.00%<br>95.00%<br>95.00%<br>95.00%<br>95.00%                                                                                           | 116<br>66<br>44<br>67<br>47<br>46                                                          | M17: Oxidation                                          | 870.9829<br>602.3301<br>878.4366<br>849.9417<br>632.3720<br>568.3248                                                                                                                  | 2<br>2<br>3<br>2<br>2<br>2                                                  | 4.9<br>2.9<br>8.9<br>8.8<br>3.8<br>4.5                                                                    | 64<br>90<br>18<br>103<br>42<br>43                                                                    | 80<br>102<br>40<br>117<br>52<br>52                                                                    | No<br>Yes<br>No<br>No<br>No<br>No                                                                    |

|     |                                       |          |                                                                                                                                                                                |                                                                                                                                       |                                      |                                      |                                                                              |                                              |  |                                                                   |                                                                                              |                                      |                                                      |                                                   |                                                    |                                              |
|-----|---------------------------------------|----------|--------------------------------------------------------------------------------------------------------------------------------------------------------------------------------|---------------------------------------------------------------------------------------------------------------------------------------|--------------------------------------|--------------------------------------|------------------------------------------------------------------------------|----------------------------------------------|--|-------------------------------------------------------------------|----------------------------------------------------------------------------------------------|--------------------------------------|------------------------------------------------------|---------------------------------------------------|----------------------------------------------------|----------------------------------------------|
| 878 | IPI00413451                           | SERPINB6 | HYPOTHETICAL PROTEIN DKFZP686I04222.                                                                                                                                           | ELNMIILPDETTDLR<br>GNTAAQMAQLSFK<br>IAELLSPGSDPLTR<br>LVLVNAVYFR<br>NLGMDAFELGK<br>SGGGGDIHQGFQSLLEVNK<br>SGGGGDIHQGFQSLLEVNK         | K<br>K<br>K<br>R<br>R<br>K<br>K      | T<br>S<br>L<br>G<br>A<br>T<br>T      | 95.00%<br>95.00%<br>95.00%<br>95.00%<br>95.00%<br>95.00%<br>95.00%           | 67<br>105<br>76<br>76<br>57<br>82<br>60      |  | M4: Oxidation, M7:<br>Oxidation<br>M7: Oxidation<br>M4: Oxidation | 968.4803<br>805.4084<br>784.4459<br>597.3601<br>656.3213<br>1022.5180<br>682.0129            | 2<br>2<br>2<br>2<br>2<br>2<br>3      | 6.0<br>5.1<br>9.0<br>6.4<br>7.0<br>8.7<br>6.2        | 260<br>80<br>179<br>194<br>321<br>351<br>95       | 275<br>94<br>193<br>203<br>332<br>114<br>114       | No<br>No<br>No<br>No<br>No<br>No<br>No       |
| 879 | IPI00418497; IPI00656071              | TIMM50   | ISOFORM 2 OF IMPORT INNER MEMBRANE TRANSLOCASE SUBUNIT TIM50, MITOCHONDRIAL PRECURSOR.; ISOFORM 1 OF IMPORT INNER MEMBRANE TRANSLOCASE SUBUNIT TIM50, MITOCHONDRIAL PRECURSOR. | IPDEFDNDPILVQQLR<br>TIALNGVEDVR<br>VLLDLSAFLK                                                                                         | K<br>K<br>R                          | R<br>T<br>T                          | 95.00%<br>95.00%<br>95.00%                                                   | 96<br>65<br>51                               |  |                                                                   | 956.5023<br>593.8273<br>559.8479                                                             | 2<br>2<br>2                          | 7.7<br>2.9<br>4.7                                    | 201<br>388<br>378                                 | 216<br>398<br>387                                  | No<br>No<br>No                               |
| 880 | IPI00419237; IPI00789806              | LAP3     | ISOFORM 1 OF CYTOSOL AMINOPEPTIDASE.; ISOFORM 2 OF CYTOSOL AMINOPEPTIDASE.                                                                                                     | EKEDDVPQFTSAGENFDK<br>ETLNISGPPPLK<br>GITFDSGGISIK<br>GSPNANEPPLVFGK<br>GVLFASGQNLAR<br>LFEASITGDR<br>TFYGLHODFPVSVLVGLGK<br>TLIEFLLR | K<br>R<br>K<br>K<br>K<br>K<br>R<br>R | L<br>A<br>A<br>G<br>Q<br>V<br>K<br>F | 95.00%<br>95.00%<br>95.00%<br>95.00%<br>95.00%<br>95.00%<br>95.00%<br>95.00% | 41<br>41<br>56<br>60<br>75<br>69<br>39<br>54 |  |                                                                   | 685.9792<br>584.8354<br>597.8251<br>763.4098<br>616.8442<br>619.3094<br>693.0483<br>502.8130 | 3<br>2<br>2<br>2<br>2<br>2<br>3<br>2 | 3.4<br>4.3<br>4.4<br>6.8<br>4.4<br>3.7<br>8.1<br>3.6 | 44<br>69<br>283<br>268<br>189<br>418<br>85<br>506 | 61<br>79<br>294<br>282<br>200<br>428<br>103<br>513 | No<br>No<br>No<br>No<br>No<br>No<br>No<br>No |
| 881 | IPI00419263; IPI00639841; IPI00827665 | PECI     | PEROXISOMAL 3,2-TRANS-ENOYL-COA ISOMERASE.; PEROXISOMAL 3,2-TRANS-ENOYL-COA ISOMERASE.; 22 KDA PROTEIN.                                                                        | PGVFDLINK<br>QNYVDLVSSLSPSLESSQVEP<br>GTDRK<br>STGFETLVVTSSEGITK<br>WDARNALGSLPK                                                      | K<br>R<br>K<br>K<br>K                | A<br>S<br>I<br>E                     | 95.00%<br>95.00%<br>95.00%<br>95.00%<br>95.00%                               | 45<br>98<br>33<br>63                         |  |                                                                   | 501.7858<br>974.8245<br>892.4596<br>679.3539                                                 | 2<br>3<br>2<br>2                     | 1.2<br>8.4<br>8.1<br>6.8                             | 47<br>74<br>101<br>58                             | 55<br>100<br>117<br>69                             | No<br>No<br>No<br>No                         |
| 882 | IPI00423426; IPI00423430              | EPM2A    | ISOFORM 1 OF LAFORIN.; ISOFORM 3 OF LAFORIN.                                                                                                                                   | HTTDFYFIAGHOAMHYSR<br>RPAVYIDEEALAR<br>RPAVYIDEEALAR                                                                                  | K<br>K<br>K                          | I<br>A<br>A                          | 95.00%<br>95.00%<br>95.00%                                                   | 48<br>42<br>61                               |  | M15: Oxidation                                                    | 578.7660<br>751.9065<br>501.6059                                                             | 4<br>2<br>3                          | 4.4<br>5.5<br>3.5                                    | 141<br>300<br>300                                 | 159<br>312<br>312                                  | No<br>No<br>No                               |
| 883 | IPI00427586; IPI00436355              | PRKG1    | CGMP-DEPENDENT PROTEIN KINASE 1, ALPHA ISOZYME.; CGMP-DEPENDENT PROTEIN KINASE 1, BETA ISOZYME.                                                                                | DLKPENLILDHR<br>LADVLEETHYENGEYIIR<br>LSDFNIDTLGVGGFGR<br>SVPTFQSLPEEILSK                                                             | R<br>K<br>K<br>K                     | G<br>Q<br>V<br>L                     | 95.00%<br>95.00%<br>95.00%<br>95.00%                                         | 35<br>42<br>105<br>48                        |  |                                                                   | 488.2741<br>722.0283<br>890.9719<br>837.9568                                                 | 3<br>3<br>2<br>2                     | 3.2<br>6.1<br>6.9<br>6.2                             | 484<br>233<br>372<br>323                          | 495<br>250<br>388<br>247                           | No<br>No<br>No<br>No                         |
| 884 | IPI00444179; IPI00787636              | LSDP5    | LIPID STORAGE DROPLET PROTEIN 5.; LIPID STORAGE DROPLET PROTEIN 5.                                                                                                             | LPFLQQPSETVVTSAK<br>SVDALQAFADAR<br>TTNFAGILSQGLR                                                                                     | K<br>R<br>R                          | D<br>C<br>I                          | 95.00%<br>95.00%<br>95.00%                                                   | 50<br>73<br>93                               |  |                                                                   | 872.9868<br>682.8483<br>689.3828                                                             | 2<br>2<br>2                          | 9.9<br>5.5<br>6.1                                    | 104<br>322<br>866                                 | 119<br>334<br>878                                  | No<br>No<br>No                               |
| 885 | IPI00449049                           | PARP1    | POLY [ADP-RIBOSE] POLYMERASE 1.                                                                                                                                                | VVSEDFLQDVSASTK                                                                                                                       | R                                    | S                                    | 95.00%                                                                       | 113                                          |  |                                                                   | 812.9142                                                                                     | 2                                    | 8.3                                                  | 453                                               | 467                                                | No                                           |
| 886 | IPI00465233; IPI00745266              | EIF3S6IP | DJ1014D13.1 PROTEIN.; EUKARYOTIC TRANSLATION INITIATION FACTOR 3 SUBUNIT 6-INTERACTING PROTEIN.                                                                                | LAGFLDLTEQEFR<br>VFSDEVQQQAQLSTIR                                                                                                     | K<br>K                               | I<br>S                               | 95.00%<br>95.00%                                                             | 81<br>94                                     |  |                                                                   | 769.9040<br>924.9840                                                                         | 2<br>2                               | 9.4<br>7.8                                           | 475<br>446                                        | 487<br>461                                         | No<br>No                                     |
| 887 | IPI00465430; IPI00644712              | XRCC6    | 70 KDA PROTEIN.; ATP-DEPENDENT DNA HELICASE 2 SUBUNIT 1.                                                                                                                       | DSLIFLVDASK<br>FDDPGLMLMGFKPLVLLK<br>IISSDRLLAVVFGTEK<br>ILELDQFK<br>NIYVLQELDNPGAK<br>SDSFENPVLQQHFR<br>TFNTSTGGLLLPSDTRK            | R<br>R<br>K<br>K<br>R<br>R<br>R      | A<br>K<br>D<br>G<br>R<br>N<br>S      | 95.00%<br>95.00%<br>95.00%<br>95.00%<br>95.00%<br>95.00%<br>95.00%           | 64<br>33<br>46<br>41<br>76<br>88<br>41       |  | M7: Oxidation, M9: Oxidation                                      | 604.3366<br>689.3774<br>676.0370<br>503.2873<br>787.4211<br>852.4143<br>603.3269             | 2<br>3<br>3<br>2<br>2<br>2<br>3      | 6.5<br>4.4<br>4.6<br>4.4<br>7.4<br>3.9<br>5.2        | 36<br>340<br>75<br>116<br>101<br>475<br>302       | 46<br>357<br>92<br>123<br>114<br>488<br>318        | No<br>No<br>No<br>No<br>No<br>No<br>No       |
| 888 | IPI00477616                           | PPP2R4   | REGULATORY SUBUNIT PR 53 OF PROTEIN PHOSPHATASE 2A ISOFORM B.                                                                                                                  | FGSLLPIHPVTSG<br>VDDQIAIVFK                                                                                                           | K<br>R                               | -<br>V                               | 95.00%<br>95.00%                                                             | 59<br>60                                     |  |                                                                   | 662.8722<br>574.3264                                                                         | 2<br>2                               | 7.6<br>7.3                                           | 361<br>224                                        | 373<br>233                                         | No<br>No                                     |
| 889 | IPI00479186                           | PKM2     | ISOFORM M2 OF PYRUVATE KINASE ISOZYMES M1/M2.                                                                                                                                  | APIIAVTR<br>APIIAVTR<br>DPVQEAWAEDVDLR<br>DPVQEAWAEDVDLR<br>EAEAAIYHLQLFEELR<br>EAEAAIYHLQLFEELRR                                     | R<br>R<br>K<br>K<br>R<br>R           | N<br>N<br>V<br>V<br>R<br>L           | 95.00%<br>95.00%<br>95.00%<br>95.00%<br>95.00%<br>95.00%                     | 35<br>62<br>97<br>65<br>52<br>59             |  |                                                                   | 840.5320<br>420.7706<br>821.8951<br>548.2656<br>644.6713<br>696.7051                         | 1<br>2<br>2<br>2<br>3<br>3           | 1.4<br>3.1<br>6.6<br>5.9<br>6.0<br>5.7               | 448<br>448<br>476<br>476<br>384<br>384            | 455<br>455<br>489<br>489<br>399<br>400             | Yes<br>Yes<br>Yes<br>Yes<br>No<br>No         |

|                          |   |   |        |     |                |           |   |     |     |     |     |
|--------------------------|---|---|--------|-----|----------------|-----------|---|-----|-----|-----|-----|
| FDEILEASDGIMVAR          | R | G | 95.00% | 120 | M12: Oxidation | 841.4142  | 2 | 5.8 | 280 | 294 | Yes |
| FGVEQDQVDMVFASFIR        | K | K | 95.00% | 121 | M9: Oxidation  | 938.4593  | 2 | 8.4 | 231 | 246 | Yes |
| FGVEQDQVDMVFASFIR        | K | K | 95.00% | 67  | M9: Oxidation  | 625.9751  | 3 | 7.8 | 231 | 246 | Yes |
| FGVEQDQVDMVFASFIR        | K | K | 95.00% | 135 |                | 930.4608  | 2 | 7.4 | 231 | 246 | Yes |
| FGVEQDQVDMVFASFIR        | K | K | 95.00% | 63  |                | 620.6429  | 3 | 7.0 | 231 | 246 | Yes |
| FGVEQDQVDMVFASFIRK       | K | A | 95.00% | 39  | M9: Oxidation  | 668.6734  | 3 | 7.2 | 231 | 247 | Yes |
| GADFLVTEVENGGLGSK        | K | K | 95.00% | 123 |                | 890.4465  | 2 | 4.8 | 189 | 206 | Yes |
| GADFLVTEVENGGLGSK        | K | K | 95.00% | 62  |                | 593.9673  | 3 | 5.4 | 189 | 206 | Yes |
| GADFLVTEVENGGLGSKK       | K | G | 95.00% | 101 |                | 954.4987  | 2 | 9.5 | 189 | 207 | Yes |
| GADFLVTEVENGGLGSKK       | K | G | 95.00% | 57  |                | 636.6658  | 3 | 5.3 | 189 | 207 | Yes |
| GDLGIEIPAEK              | R | V | 95.00% | 48  |                | 1141.6160 | 1 | 4.6 | 295 | 305 | Yes |
| GDLGIEIPAEK              | R | V | 95.00% | 69  |                | 571.3098  | 2 | 0.9 | 295 | 305 | Yes |
| GDVVIVLTGWRPGSGFTNTMR    | K | V | 95.00% | 59  | M20: Oxidation | 760.3990  | 3 | 9.1 | 506 | 526 | Yes |
| GDYPLEAVR                | K | M | 95.00% | 48  |                | 1019.5200 | 1 | 3.7 | 368 | 376 | Yes |
| GDYPLEAVR                | K | M | 95.00% | 52  |                | 510.2629  | 2 | 1.7 | 368 | 376 | Yes |
| GPEIR                    | K | T | 95.00% | 30  |                | 571.3227  | 1 | 4.0 | 116 | 120 | Yes |
| GSGTAEVELK               | K | K | 95.00% | 54  |                | 495.7619  | 2 | 5.2 | 126 | 135 | Yes |
| GSGTAEVELKK              | K | G | 95.00% | 53  |                | 559.8099  | 2 | 5.5 | 126 | 136 | Yes |
| GVNLPGAAVDLPAVSEK        | K | D | 95.00% | 125 |                | 818.9558  | 2 | 7.7 | 208 | 224 | Yes |
| GVNLPGAAVDLPAVSEK        | K | D | 95.00% | 59  |                | 546.3052  | 3 | 5.4 | 208 | 224 | Yes |
| GVNLPGAAVDLPAVSEKDIQDLK  | K | F | 95.00% | 92  |                | 1175.1470 | 2 | 7.8 | 208 | 230 | Yes |
| GVNLPGAAVDLPAVSEKDIQDLK  | K | F | 95.00% | 64  |                | 783.7662  | 3 | 6.9 | 208 | 230 | Yes |
| IENHEGVR                 | K | R | 95.00% | 45  |                | 477.2463  | 2 | 4.5 | 271 | 278 | Yes |
| ITLDNAYMEK               | K | C | 95.00% | 50  | M8: Oxidation  | 1213.5850 | 1 | 6.1 | 142 | 151 | Yes |
| ITLDNAYMEK               | K | C | 95.00% | 75  | M8: Oxidation  | 607.2951  | 2 | 3.9 | 142 | 151 | Yes |
| ITLDNAYMEK               | K | C | 95.00% | 61  |                | 599.2980  | 2 | 4.5 | 142 | 151 | Yes |
| IYVDDGLISLQVK            | K | Q | 95.00% | 111 |                | 731.9161  | 2 | 5.8 | 174 | 186 | Yes |
| IYVDDGLISLQVK            | K | Q | 95.00% | 49  |                | 488.2799  | 3 | 5.6 | 174 | 186 | Yes |
| KGDVVIVLTGWR             | K | P | 95.00% | 84  |                | 671.9004  | 2 | 6.1 | 505 | 516 | Yes |
| KGDVVIVLTGWR             | K | P | 95.00% | 57  |                | 448.2683  | 3 | 3.2 | 505 | 516 | Yes |
| KGDVVIVLTGWRPGSGFTNTMR   | K | V | 95.00% | 41  | M21: Oxidation | 803.0960  | 3 | 7.0 | 505 | 526 | Yes |
| KGDVVIVLTGWRPGSGFTNTMR   | K | V | 95.00% | 42  | M21: Oxidation | 602.5722  | 4 | 4.1 | 505 | 526 | Yes |
| KGVNLPGAAVDLPAVSEK       | K | D | 95.00% | 145 |                | 883.0006  | 2 | 4.1 | 207 | 224 | Yes |
| KGVNLPGAAVDLPAVSEK       | K | D | 95.00% | 51  |                | 589.0039  | 3 | 5.6 | 207 | 224 | Yes |
| KGVNLPGAAVDLPAVSEKDIQDLK | K | F | 95.00% | 90  |                | 1239.1940 | 2 | 7.4 | 207 | 230 | Yes |
| KGVNLPGAAVDLPAVSEKDIQDLK | K | F | 95.00% | 96  |                | 826.4634  | 3 | 5.1 | 207 | 230 | Yes |
| KGVNLPGAAVDLPAVSEKDIQDLK | K | F | 95.00% | 49  |                | 620.0998  | 4 | 5.6 | 207 | 230 | Yes |
| LAPITSDPTEATAVGAVEASFK   | R | C | 95.00% | 143 |                | 1088.0700 | 2 | 6.5 | 401 | 422 | No  |
| LAPITSDPTEATAVGAVEASFK   | R | C | 95.00% | 61  |                | 725.7160  | 3 | 6.3 | 401 | 422 | No  |
| LDIDSPPIAR               | R | N | 95.00% | 50  |                | 1197.6590 | 1 | 9.0 | 33  | 43  | Yes |
| LDIDSPPIAR               | R | N | 95.00% | 77  |                | 599.3289  | 2 | 1.5 | 33  | 43  | Yes |
| LNFSHGTHEYHAETIK         | R | N | 95.00% | 112 |                | 942.4594  | 2 | 3.6 | 74  | 89  | Yes |
| LNFSHGTHEYHAETIK         | R | N | 95.00% | 68  |                | 628.6415  | 3 | 2.5 | 74  | 89  | Yes |
| MQHLIAR                  | R | E | 95.00% | 35  | M1: Oxidation  | 442.7451  | 2 | 5.5 | 377 | 383 | Yes |
| NTGICTIGPASR             | R | S | 95.00% | 57  |                | 651.8483  | 2 | 3.6 | 44  | 56  | Yes |
| PGSGFTNTMR               | R | V | 95.00% | 42  | M9: Oxidation  | 542.2507  | 2 | 3.8 | 517 | 526 | Yes |
| PVAVALDTK                | R | G | 95.00% | 42  |                | 457.2727  | 2 | 1.8 | 107 | 115 | Yes |
| PVAVALDTKGPEIR           | R | T | 95.00% | 40  |                | 733.4247  | 2 | 2.4 | 107 | 120 | Yes |
| PVAVALDTKGPEIR           | R | T | 95.00% | 58  |                | 489.2866  | 3 | 4.2 | 107 | 120 | Yes |
| QKGADFLVTEVENGGLGSK      | K | K | 95.00% | 112 |                | 1018.5240 | 2 | 5.3 | 187 | 206 | Yes |
| QKGADFLVTEVENGGLGSK      | K | K | 95.00% | 69  |                | 679.3526  | 3 | 5.9 | 187 | 206 | Yes |
| QKGADFLVTEVENGGLGSKK     | K | G | 95.00% | 41  |                | 722.0516  | 3 | 6.5 | 187 | 207 | Yes |
| RFDEILEASDGIMVAR         | R | G | 95.00% | 91  | M13: Oxidation | 919.4687  | 2 | 9.6 | 279 | 294 | Yes |
| RFDEILEASDGIMVAR         | R | G | 95.00% | 75  | M13: Oxidation | 613.3121  | 3 | 4.7 | 279 | 294 | Yes |
| RFDEILEASDGIMVAR         | R | G | 95.00% | 84  |                | 911.4675  | 2 | 5.6 | 279 | 294 | Yes |
| RFDEILEASDGIMVAR         | R | G | 95.00% | 55  |                | 607.9806  | 3 | 5.1 | 279 | 294 | Yes |
| SVETLKEMIK               | R | S | 95.00% | 49  | M8: Oxidation  | 597.3270  | 2 | 0.8 | 57  | 66  | Yes |
| TATESFASDPILYR           | R | P | 95.00% | 89  |                | 785.8962  | 2 | 5.9 | 93  | 106 | Yes |
| TATESFASDPILYRPVAVALDTK  | R | G | 95.00% | 59  |                | 1233.1580 | 2 | 6.2 | 93  | 115 | Yes |
| TATESFASDPILYRPVAVALDTK  | R | G | 95.00% | 67  |                | 822.4424  | 3 | 7.7 | 93  | 115 | Yes |





|                         |                                                    |       |                                                                                                     |                         |                                                                 |   |        |     |                                             |     |     |     |     |     |
|-------------------------|----------------------------------------------------|-------|-----------------------------------------------------------------------------------------------------|-------------------------|-----------------------------------------------------------------|---|--------|-----|---------------------------------------------|-----|-----|-----|-----|-----|
| 914                     | IPI00022371                                        | HRG   | HISTIDINE-RICH GLYCOPROTEIN PRECURSOR.                                                              | YPVGIEVGPQPQGVLR        | K                                                               | A | 95.00% | 60  | 854.9813                                    | 2   | 9.4 | 173 | 188 | No  |
|                         |                                                    |       |                                                                                                     | ADLFYDVEALDLESPK        | R                                                               | N | 95.00% | 93  | 912.9537                                    | 2   | 4.7 | 220 | 235 | No  |
|                         |                                                    |       |                                                                                                     | DGYLFQLLR               | R                                                               | I | 95.00% | 42  | 562.8123                                    | 2   | 5.4 | 44  | 52  | No  |
|                         |                                                    |       |                                                                                                     | DSPVLIDFFEDTER          | K                                                               | Y | 95.00% | 99  | 841.9051                                    | 2   | 6.5 | 140 | 153 | No  |
| 915                     | IPI00022697; IPI00794194; IPI00794224; IPI00797141 | DRG2  | DEVELOPMENTALLY-REGULATED GTP-BINDING PROTEIN 2.; 38 KDA PROTEIN.; 18 KDA PROTEIN.; 27 KDA PROTEIN. | GANIQLLDLPGIIEGAAQGK    | K                                                               | G | 95.00% | 52  | 660.0422                                    | 3   | 6.6 | 108 | 127 | No  |
|                         |                                                    |       |                                                                                                     | VALIGFPPSVGK            | R                                                               | S | 95.00% | 41  | 544.3328                                    | 2   | 5.6 | 65  | 75  | No  |
| 916                     | IPI00023006                                        | ACTC1 | ACTIN, ALPHA CARDIAC MUSCLE 1.                                                                      | AGFAGDDAPR              | K                                                               | A | 95.00% | 57  | 976.4520                                    | 1   | 3.2 | 21  | 30  | Yes |
|                         |                                                    |       |                                                                                                     | AGFAGDDAPR              | K                                                               | A | 95.00% | 90  | 488.7286                                    | 2   | 0.4 | 21  | 30  | Yes |
|                         |                                                    |       |                                                                                                     | AVFPSIVGR               | R                                                               | P | 95.00% | 78  | 473.2805                                    | 2   | 1.0 | 31  | 39  | Yes |
|                         |                                                    |       |                                                                                                     | AVFPSIVGRPR             | R                                                               | H | 95.00% | 72  | 599.8580                                    | 2   | 1.6 | 31  | 41  | Yes |
|                         |                                                    |       |                                                                                                     | DLTDYLMK                | R                                                               | I | 95.00% | 42  | 1014.4830                                   | 1   | 0.5 | 186 | 193 | Yes |
|                         |                                                    |       |                                                                                                     | DLTDYLMK                | R                                                               | I | 95.00% | 56  | M7: Oxidation<br>507.7452                   | 2   | 0.5 | 186 | 193 | Yes |
|                         |                                                    |       |                                                                                                     | DLTDYLMK                | R                                                               | I | 95.00% | 43  | 499.7490                                    | 2   | 3.1 | 186 | 193 | Yes |
|                         |                                                    |       |                                                                                                     | DLYANNVLSGGTTMYPGIADR   | K                                                               | M | 95.00% | 116 | M14: Oxidation<br>1122.5440                 | 2   | 8.4 | 294 | 314 | No  |
|                         |                                                    |       |                                                                                                     | DSYVGDEAQSK             | K                                                               | R | 95.00% | 85  | 599.7688                                    | 2   | 5.8 | 53  | 63  | Yes |
|                         |                                                    |       |                                                                                                     | DSYVGDEAQSKR            | K                                                               | G | 95.00% | 65  | 677.8182                                    | 2   | 3.5 | 53  | 64  | Yes |
|                         |                                                    |       |                                                                                                     | DSYVGDEAQSKR            | K                                                               | G | 95.00% | 36  | 452.2152                                    | 3   | 4.6 | 53  | 64  | Yes |
|                         |                                                    |       |                                                                                                     | EITALAPSTMK             | K                                                               | I | 95.00% | 71  | M10: Oxidation<br>1177.6180                 | 1   | 3.4 | 318 | 328 | Yes |
|                         |                                                    |       |                                                                                                     | EITALAPSTMK             | K                                                               | I | 95.00% | 91  | M10: Oxidation<br>589.3121                  | 2   | 2.0 | 318 | 328 | Yes |
|                         |                                                    |       |                                                                                                     | EITALAPSTMK             | K                                                               | I | 95.00% | 58  | 1161.6240                                   | 1   | 4.3 | 318 | 328 | Yes |
|                         |                                                    |       |                                                                                                     | EITALAPSTMK             | K                                                               | I | 95.00% | 57  | 581.3137                                    | 2   | 0.3 | 318 | 328 | Yes |
|                         |                                                    |       |                                                                                                     | GILTLK                  | R                                                               | Y | 95.00% | 37  | 644.4368                                    | 1   | 3.0 | 65  | 70  | Yes |
|                         |                                                    |       |                                                                                                     | GYSFVTTAER              | R                                                               | E | 95.00% | 42  | 1130.5520                                   | 1   | 3.3 | 199 | 208 | Yes |
|                         |                                                    |       |                                                                                                     | GYSFVTTAER              | R                                                               | E | 95.00% | 80  | 565.7791                                    | 2   | 1.8 | 199 | 208 | Yes |
|                         |                                                    |       |                                                                                                     | HQGMVMGMGQK             | R                                                               | D | 95.00% | 63  | M5: Oxidation<br>594.2880                   | 2   | 1.2 | 42  | 52  | Yes |
|                         |                                                    |       |                                                                                                     | HQGMVMGMGQK             | R                                                               | D | 95.00% | 58  | M5: Oxidation<br>602.2905                   | 2   | 9.6 | 42  | 52  | Yes |
|                         |                                                    |       |                                                                                                     | HQGMVMGMGQK             | R                                                               | D | 95.00% | 58  | M5: Oxidation<br>401.8611                   | 3   | 5.1 | 42  | 52  | Yes |
|                         |                                                    |       |                                                                                                     | HQGMVMGMGQK             | R                                                               | D | 95.00% | 58  | M5: Oxidation, M8:<br>Oxidation<br>602.2905 | 2   | 9.6 | 42  | 52  | Yes |
|                         |                                                    |       |                                                                                                     | HQGMVMGMGQK             | R                                                               | D | 95.00% | 58  | M5: Oxidation, M8:<br>Oxidation<br>401.8611 | 3   | 5.1 | 42  | 52  | Yes |
|                         |                                                    |       |                                                                                                     | HQGMVMGMGQK             | R                                                               | D | 95.00% | 61  | M8: Oxidation<br>594.2899                   | 2   | 4.5 | 42  | 52  | Yes |
|                         |                                                    |       |                                                                                                     | HQGMVMGMGQK             | R                                                               | D | 95.00% | 71  | 1171.5740                                   | 1   | 2.1 | 42  | 52  | Yes |
|                         |                                                    |       |                                                                                                     | HQGMVMGMGQK             | R                                                               | D | 95.00% | 82  | 586.2905                                    | 2   | 1.3 | 42  | 52  | Yes |
|                         |                                                    |       |                                                                                                     | IIAPPERK                | K                                                               | Y | 95.00% | 36  | 462.2889                                    | 2   | 2.3 | 331 | 338 | Yes |
|                         |                                                    |       |                                                                                                     | IKIIAPPER               | K                                                               | K | 95.00% | 21  | 518.8315                                    | 2   | 2.9 | 329 | 337 | Yes |
|                         |                                                    |       |                                                                                                     | IKIIAPPERK              | K                                                               | Y | 95.00% | 26  | 582.8785                                    | 2   | 1.9 | 329 | 338 | Yes |
|                         |                                                    |       |                                                                                                     | IWHHTFYNELR             | K                                                               | V | 95.00% | 70  | 758.3789                                    | 2   | 0.2 | 87  | 97  | Yes |
|                         |                                                    |       |                                                                                                     | IWHHTFYNELR             | K                                                               | V | 95.00% | 61  | 505.9238                                    | 3   | 4.1 | 87  | 97  | Yes |
|                         |                                                    |       |                                                                                                     | KDLYANNVLSGGTTMYPGIADR  | R                                                               | M | 95.00% | 63  | M15: Oxidation<br>791.3947                  | 3   | 5.2 | 293 | 314 | No  |
|                         |                                                    |       |                                                                                                     | MTQIMFETFNVPAMYVAIQAVLS | K                                                               | T | 95.00% | 64  | M1: Oxidation<br>1089.8870                  | 3   | 6.0 | 121 | 149 | Yes |
|                         |                                                    |       |                                                                                                     | LYASGR                  | K                                                               | T | 95.00% | 87  | M1: Oxidation<br>1095.2200                  | 3   | 7.4 | 121 | 149 | Yes |
| MTQIMFETFNVPAMYVAIQAVLS | K                                                  | T     | 95.00%                                                                                              | 38                      | M1: Oxidation<br>821.6656                                       | 4 | 5.9    | 121 | 149                                         | Yes |     |     |     |     |
| LYASGR                  | K                                                  | T     | 95.00%                                                                                              | 63                      | M1: Oxidation<br>1100.5530                                      | 3 | 8.7    | 121 | 149                                         | Yes |     |     |     |     |
| MTQIMFETFNVPAMYVAIQAVLS | K                                                  | T     | 95.00%                                                                                              | 87                      | M1: Oxidation, M5:<br>Oxidation<br>1095.2200                    | 3 | 7.4    | 121 | 149                                         | Yes |     |     |     |     |
| LYASGR                  | K                                                  | T     | 95.00%                                                                                              | 38                      | M1: Oxidation, M5:<br>Oxidation<br>821.6656                     | 4 | 5.9    | 121 | 149                                         | Yes |     |     |     |     |
| MTQIMFETFNVPAMYVAIQAVLS | K                                                  | T     | 95.00%                                                                                              | 63                      | M1: Oxidation, M5:<br>Oxidation<br>1100.5530                    | 3 | 8.7    | 121 | 149                                         | Yes |     |     |     |     |
| LYASGR                  | K                                                  | T     | 95.00%                                                                                              | 63                      | M1: Oxidation, M5:<br>Oxidation, M14:<br>Oxidation<br>1100.5530 | 3 | 8.7    | 121 | 149                                         | Yes |     |     |     |     |
| MTQIMFETFNVPAMYVAIQAVLS | K                                                  | T     | 95.00%                                                                                              | 91                      | M5: Oxidation<br>1089.8870                                      | 3 | 6.1    | 121 | 149                                         | Yes |     |     |     |     |
| LYASGR                  | K                                                  | K     | 95.00%                                                                                              | 85                      | 750.8606                                                        | 2 | 3.3    | 362 | 374                                         | Yes |     |     |     |     |
| QEYDEAGPSIVHR           | K                                                  | K     | 95.00%                                                                                              | 63                      | 500.9085                                                        | 3 | 1.1    | 362 | 374                                         | Yes |     |     |     |     |
| QEYDEAGPSIVHRK          | K                                                  | C     | 95.00%                                                                                              | 64                      | 814.9073                                                        | 2 | 2.1    | 362 | 375                                         | Yes |     |     |     |     |
| QEYDEAGPSIVHRK          | K                                                  | C     | 95.00%                                                                                              | 36                      | 543.6075                                                        | 3 | 2.1    | 362 | 375                                         | Yes |     |     |     |     |
| RGILTLK                 | K                                                  | Y     | 95.00%                                                                                              | 39                      | 400.7726                                                        | 2 | 1.9    | 64  | 70                                          | Yes |     |     |     |     |
| SYELPDGQVITIGNER        | K                                                  | F     | 95.00%                                                                                              | 132                     | 895.9526                                                        | 2 | 2.7    | 241 | 256                                         | Yes |     |     |     |     |
| SYELPDGQVITIGNER        | K                                                  | F     | 95.00%                                                                                              | 73                      | 597.6398                                                        | 3 | 6.2    | 241 | 256                                         | Yes |     |     |     |     |

|     |                                                                    |              |                                                                                                                                                                                                                                             |                                                                           |                  |                  |                                      |                      |                                                  |                                              |                  |                          |                         |                         |                      |
|-----|--------------------------------------------------------------------|--------------|---------------------------------------------------------------------------------------------------------------------------------------------------------------------------------------------------------------------------------------------|---------------------------------------------------------------------------|------------------|------------------|--------------------------------------|----------------------|--------------------------------------------------|----------------------------------------------|------------------|--------------------------|-------------------------|-------------------------|----------------------|
|     |                                                                    |              |                                                                                                                                                                                                                                             | TTGIVLDSGDGVTHNVPIYEGYA<br>LPHAIMR                                        | R                | L                | 95.00%                               | 65                   | M29: Oxidation                                   | 1071.5500                                    | 3                | 9.3                      | 150                     | 179                     | Yes                  |
|     |                                                                    |              |                                                                                                                                                                                                                                             | TTGIVLDSGDGVTHNVPIYEGYA<br>LPHAIMR                                        | R                | L                | 95.00%                               | 56                   | M29: Oxidation                                   | 643.3307                                     | 5                | 5.5                      | 150                     | 179                     | Yes                  |
|     |                                                                    |              |                                                                                                                                                                                                                                             | TTGIVLDSGDGVTHNVPIYEGYA<br>LPHAIMR                                        | R                | L                | 95.00%                               | 72                   |                                                  | 1066.2180                                    | 3                | 9.2                      | 150                     | 179                     | Yes                  |
|     |                                                                    |              |                                                                                                                                                                                                                                             | TTGIVLDSGDGVTHNVPIYEGYA<br>LPHAIMR                                        | R                | L                | 95.00%                               | 39                   |                                                  | 799.9139                                     | 4                | 7.0                      | 150                     | 179                     | Yes                  |
|     |                                                                    |              |                                                                                                                                                                                                                                             | VAPEEHPTLLTEAPLNPK                                                        | R                | A                | 95.00%                               | 96                   |                                                  | 978.5319                                     | 2                | 5.7                      | 98                      | 115                     | Yes                  |
|     |                                                                    |              |                                                                                                                                                                                                                                             | VAPEEHPTLLTEAPLNPK                                                        | R                | A                | 95.00%                               | 61                   |                                                  | 652.6883                                     | 3                | 2.4                      | 98                      | 115                     | Yes                  |
|     |                                                                    |              |                                                                                                                                                                                                                                             | YPIEHGITNWDDEMEK                                                          | K                | I                | 95.00%                               | 35                   | M14: Oxidation                                   | 988.9588                                     | 2                | 1.6                      | 71                      | 86                      | Yes                  |
| 917 | IPI00024990                                                        | ALDH6A1      | METHYLMALONATE-SEMIALDEHYDE<br>DEHYDROGENASE [ACYLATING],<br>MITOCHONDRIALPRECURSOR.                                                                                                                                                        | TLADAEGDVFR                                                               | K                | G                | 95.00%                               | 42                   |                                                  | 597.2964                                     | 2                | 3.8                      | 130                     | 140                     | No                   |
| 918 | IPI00025721                                                        | COPS3        | COP9 SIGNALOSOME COMPLEX SUBUNIT 3.                                                                                                                                                                                                         | VNAGDQPGADLGPLITPQAK<br>AMDQEITVNPQFVQK<br>FIKPLSNAYHELAQVYSTNNPSE<br>LR  | R<br>K<br>R      | E<br>S<br>N      | 95.00%<br>95.00%<br>95.00%           | 54<br>85<br>93       | M2: Oxidation                                    | 981.5238<br>882.4391<br>964.5012             | 2<br>2<br>3      | 4.9<br>3.6<br>6.6        | 345<br>392<br>252       | 364<br>406<br>276       | No<br>No<br>No       |
| 919 | IPI00026516                                                        | OXCT1        | SUCCINYL-COA:3-KETOACID-COENZYME A<br>TRANSFERASE 1, MITOCHONDRIALPRECURSOR.                                                                                                                                                                | GLTAVSNNAGVDNFGLLLR<br>MVSSYVGENAEFER<br>YGDLANWMIPGK                     | K<br>R<br>K      | S<br>Q<br>M      | 95.00%<br>95.00%<br>95.00%           | 127<br>75<br>41      | M1: Oxidation<br>M8: Oxidation                   | 1051.0840<br>817.3655<br>690.8390            | 2<br>2<br>2      | 9.1<br>4.1<br>5.7        | 84<br>111<br>407        | 104<br>124<br>418       | No<br>No<br>No       |
| 920 | IPI00026942                                                        | ERLIN2       | SPFH2 PROTEIN (FRAGMENT).                                                                                                                                                                                                                   | IEVVNFLVPAVYDIVK<br>ISEIEDAAFLAR                                          | R<br>K           | N<br>E           | 95.00%<br>95.00%                     | 75<br>83             |                                                  | 966.5549<br>667.8566                         | 2<br>2           | 9.0<br>7.2               | 89<br>242               | 105<br>253              | No<br>No             |
| 921 | IPI00027258; IPI00413058; IPI00413060                              | SYNPO        | ISOFORM 2 OF SYNAPTOPODIN.; ISOFORM 1 OF<br>SYNAPTOPODIN.; ISOFORM 3 OF<br>SYNAPTOPODIN.                                                                                                                                                    | VASEEEEEPLVVYLK<br>VTPNPDDLVLQTADEK                                       | K<br>K           | E<br>R           | 95.00%<br>95.00%                     | 72<br>84             |                                                  | 852.4618<br>934.4933                         | 2<br>2           | 3.0<br>7.1               | 17<br>389               | 31<br>405               | No<br>No             |
| 922 | IPI00027444                                                        | SERPINB1     | LEUKOCYTE ELASTASE INHIBITOR.                                                                                                                                                                                                               | FAYGYIEDLK<br>TYGADLASVDFQHASEDAR                                         | K<br>K           | C<br>K           | 95.00%<br>95.00%                     | 32<br>57             |                                                  | 609.8091<br>684.9835                         | 2<br>3           | 4.7<br>4.2               | 204<br>111              | 213<br>129              | No<br>No             |
| 923 | IPI00028635; IPI00383680; IPI00552307;<br>IPI00552972; IPI00789816 | RPN2         | DOLICHYL-DIPHOSPHOOLIGOSACCHARIDE--<br>PROTEIN GLYCOSYLTRANSFERASE 63<br>K DASUBUNIT PRECURSOR.; RIBOPHORIN II.;<br>RIBOPHORIN II.; 56 KDA PROTEIN.; 71 KDA<br>PROTEIN.                                                                     | SIVEEIEDLVAR<br>TGQEVVFAEVDNK<br>AFLGGGQEAIDIALLLR                        | R<br>K<br>R      | L<br>N<br>D      | 95.00%<br>95.00%<br>95.00%           | 70<br>34<br>81       |                                                  | 686.8747<br>766.8908<br>908.5070             | 2<br>2<br>2      | 6.7<br>9.1<br>4.9        | 54<br>318<br>769        | 65<br>331<br>785        | No<br>No<br>No       |
| 924 | IPI00029485                                                        | DCTN1        | ISOFORM P150 OF DYNACTIN-1.                                                                                                                                                                                                                 | KTSQLETLNQLSTHTHVVDITR<br>VDELTDDLEILKAEIEEK                              | R<br>R           | T<br>G           | 95.00%<br>95.00%                     | 31<br>38             |                                                  | 659.3638<br>696.7084                         | 4<br>3           | 3.8<br>6.2               | 1151<br>332             | 1173<br>349             | No<br>No             |
| 925 | IPI00031618; IPI00796836                                           | DDI2; RSC1A1 | PROTEIN DDI1 HOMOLOG 2.; 112 KDA PROTEIN.                                                                                                                                                                                                   | EDVRPEEADQELAEALQK<br>LFSADPFDELAQAK                                      | R<br>R           | S<br>I           | 95.00%<br>95.00%                     | 39<br>52             |                                                  | 728.3708<br>776.3930                         | 3<br>2           | 6.0<br>5.5               | 371<br>192              | 389<br>205              | No<br>No             |
| 926 | IPI00166642                                                        | D2HGDH       | ISOFORM 1 OF D-2-HYDROXYGLUTARATE<br>DEHYDROGENASE,<br>MITOCHONDRIALPRECURSOR.                                                                                                                                                              | LYDIVTDLR<br>YDLSLPVER                                                    | R<br>K           | A<br>L           | 95.00%<br>95.00%                     | 54<br>34             |                                                  | 554.3098<br>546.2932                         | 2<br>2           | 6.0<br>4.4               | 411<br>402              | 419<br>410              | No<br>No             |
| 927 | IPI00179291; IPI00645898; IPI00793375                              | XPNPEP1      | ISOFORM 1 OF XAA-PRO AMINOPEPTIDASE 1.; X-<br>PROLYL AMINOPEPTIDASE (AMINOPEPTIDASE P)<br>1, SOLUBLE.; CYTOSOLIC AMINOPEPTIDASE P.                                                                                                          | GSLTFEPLTLVPIQTK<br>TSLSLDEVYLIDSGAQYK                                    | R<br>R           | M<br>D           | 95.00%<br>95.00%                     | 67<br>67             |                                                  | 872.5046<br>957.9949                         | 2<br>2           | 6.5<br>6.1               | 598<br>448              | 613<br>464              | No<br>No             |
| 928 | IPI00215610                                                        | MPP1         | 55 KDA ERYTHROCYTE MEMBRANE PROTEIN.                                                                                                                                                                                                        | HSSIFDQLDVVSYEEVVR<br>IAILDIEPQTLK                                        | K<br>K           | L<br>I           | 95.00%<br>95.00%                     | 34<br>64             |                                                  | 708.0243<br>677.4078                         | 3<br>2           | 5.6<br>6.0               | 259<br>375              | 276<br>386              | No<br>No             |
| 929 | IPI00215637                                                        | DDX3X        | ATP-DEPENDENT RNA HELICASE DDX3X.                                                                                                                                                                                                           | DLLDLLVEAK<br>SFLDLLLNATGK<br>VGNLGLATSFNER                               | K<br>R<br>R      | Q<br>D<br>N      | 95.00%<br>95.00%<br>95.00%           | 56<br>93<br>67       |                                                  | 564.8324<br>646.3701<br>762.8974             | 2<br>2<br>2      | 4.4<br>4.5<br>3.8        | 555<br>429<br>535       | 564<br>440<br>548       | No<br>No<br>No       |
| 930 | IPI00218857; IPI00218858; IPI00220438                              | MAP2K3       | ISOFORM 1 OF DUAL SPECIFICITY MITOGEN-<br>ACTIVATED PROTEIN KINASE KINASE3.;<br>ISOFORM 2 OF DUAL SPECIFICITY MITOGEN-<br>ACTIVATED PROTEIN KINASE KINASE3.;<br>ISOFORM 3 OF DUAL SPECIFICITY MITOGEN-<br>ACTIVATED PROTEIN KINASE KINASE3. | LLMDLDINMR<br>NMTPIPEDILGEIAVSIVR                                         | R<br>K           | T<br>A           | 95.00%<br>95.00%                     | 42<br>70             | M3: Oxidation, M9:<br>Oxidation<br>M2: Oxidation | 633.3137<br>662.6968                         | 2<br>3           | -3.1<br>8.4              | 112<br>163              | 121<br>180              | No<br>No             |
| 931 | IPI00220271                                                        | AKR1A1       | ALCOHOL DEHYDROGENASE.                                                                                                                                                                                                                      | AWRDPDEPVLLLEPVVLALAEK<br>GLEVTAYSPLGSSDR<br>GLVQALGLSNFNSR<br>MPLIGLGTWK | R<br>R<br>K<br>K | Y<br>A<br>Q<br>S | 95.00%<br>95.00%<br>95.00%<br>95.00% | 47<br>56<br>78<br>37 | M1: Oxidation                                    | 830.4546<br>776.3913<br>738.4067<br>566.3171 | 3<br>2<br>2<br>2 | 7.7<br>6.0<br>5.8<br>2.3 | 219<br>204<br>154<br>14 | 240<br>218<br>167<br>23 | No<br>No<br>No<br>No |

|          |                                       |         |                                                                                                                                                   |                         |          |   |        |      |                |           |   |      |      |      |     |  |  |  |  |  |
|----------|---------------------------------------|---------|---------------------------------------------------------------------------------------------------------------------------------------------------|-------------------------|----------|---|--------|------|----------------|-----------|---|------|------|------|-----|--|--|--|--|--|
| 932      | IPI00221234; IPI00786942              | ALDH7A1 | SIMILAR TO ALDEHYDE DEHYDROGENASE FAMILY 7 MEMBER A1.; SIMILAR TO ANTIQUITIN.                                                                     | GAPTTSLISVAVTK          | K        | I | 95.00% | 87   | M12: Oxidation | 672.8939  | 2 | 4.4  | 219  | 232  | No  |  |  |  |  |  |
|          |                                       |         |                                                                                                                                                   | IQVLGSLVLSLEMGK         | K        | I | 95.00% | 29   |                | 745.4236  | 2 | 6.1  | 125  | 138  | No  |  |  |  |  |  |
|          |                                       |         |                                                                                                                                                   | VNLLSFTGSTQVQK          | R        | Q | 95.00% | 39   |                | 725.9026  | 2 | 4.6  | 267  | 280  | No  |  |  |  |  |  |
| 933      | IPI00291165; IPI00744711              | PNPT1   | POLYRIBONUCLEOTIDE NUCLEOTIDYLTRANSFERASE 1, MITOCHONDRIAL PRECURSOR.; 86 KDA PROTEIN.                                                            | IVMEAIQQASVAK           | K        | K | 95.00% | 55   | M3: Oxidation  | 702.3849  | 2 | 3.7  | 572  | 584  | No  |  |  |  |  |  |
|          |                                       |         |                                                                                                                                                   | YTQQIIQIQQLVK           | K        | E | 95.00% | 96   |                | 830.4814  | 2 | 6.9  | 251  | 264  | No  |  |  |  |  |  |
|          |                                       |         |                                                                                                                                                   |                         |          |   |        |      |                |           |   |      |      |      |     |  |  |  |  |  |
| 934      | IPI00294578                           | TGM2    | ISOFORM 1 OF PROTEIN-GLUTAMINE GAMMA-GLUTAMYLTRANSFERASE 2.                                                                                       | ALLVEPVINSYLLAER        | R        | D | 95.00% | 81   |                | 900.5243  | 2 | 7.5  | 565  | 580  | No  |  |  |  |  |  |
|          |                                       |         |                                                                                                                                                   | YLLNLNLEPFSEK           | K        | S | 95.00% | 37   |                | 790.4264  | 2 | 4.9  | 528  | 540  | No  |  |  |  |  |  |
| 935      | IPI00296283                           | MAPK12  | MITOGEN-ACTIVATED PROTEIN KINASE 12.                                                                                                              | DFASILTNASPLAVNLEK      | K        | M | 95.00% | 60   |                | 1008.5570 | 2 | 2.0  | 272  | 290  | No  |  |  |  |  |  |
|          |                                       |         |                                                                                                                                                   | DFASILTNASPLAVNLEK      | K        | M | 95.00% | 68   |                | 672.7105  | 3 | 7.0  | 272  | 290  | No  |  |  |  |  |  |
|          |                                       |         |                                                                                                                                                   | ILDFGLAR                | K        | Q | 95.00% | 54   |                | 452.7682  | 2 | 3.1  | 169  | 176  | No  |  |  |  |  |  |
| 936      | IPI00298237; IPI00554538; IPI00554617 | TPP1    | ISOFORM 1 OF TRIPEPTIDYL-PEPTIDASE 1 PRECURSOR.; ISOFORM 3 OF TRIPEPTIDYL-PEPTIDASE 1 PRECURSOR.; ISOFORM 2 OF TRIPEPTIDYL-PEPTIDASE 1 PRECURSOR. | ILSGRPPLGFLNPR          | R        | L | 95.00% | 23   |                | 512.9745  | 3 | 4.2  | 493  | 506  | No  |  |  |  |  |  |
|          |                                       |         |                                                                                                                                                   | LFGGNFAHQASVAR          | R        | V | 95.00% | 98   |                | 737.8855  | 2 | 5.2  | 246  | 259  | No  |  |  |  |  |  |
|          |                                       |         |                                                                                                                                                   | LFGGNFAHQASVAR          | R        | V | 95.00% | 34   |                | 492.2593  | 3 | 4.6  | 246  | 259  | No  |  |  |  |  |  |
| 937      | IPI00298520; IPI00514053              | ARCN1   | HYPOTHETICAL PROTEIN DKFZP686M09245.; COATOMER SUBUNIT DELTA.                                                                                     | LFTAESLIGLK             | K        | N | 95.00% | 46   |                | 596.3572  | 2 | 6.2  | 378  | 388  | No  |  |  |  |  |  |
|          |                                       |         |                                                                                                                                                   | NSNILEDLETLR            | K        | L | 95.00% | 71   |                | 708.8754  | 2 | 6.5  | 114  | 125  | No  |  |  |  |  |  |
| 938      | IPI00298971                           | VTN     | VITRONECTIN PRECURSOR.                                                                                                                            | DWWGIEGPIDAAFTR         | R        | I | 95.00% | 66   |                | 823.9176  | 2 | 5.6  | 198  | 212  | No  |  |  |  |  |  |
|          |                                       |         |                                                                                                                                                   | FEDGVLDPDYPR            | R        | N | 95.00% | 43   |                | 711.8329  | 2 | 2.5  | 230  | 241  | No  |  |  |  |  |  |
| 939      | IPI00299063                           | STIM1   | STROMAL INTERACTION MOLECULE 1 PRECURSOR.                                                                                                         | ALDTVLFGPPLLR           | K        | H | 95.00% | 61   |                | 756.9465  | 2 | 4.0  | 194  | 207  | No  |  |  |  |  |  |
| 940      | IPI00301280                           | TMEM43  | TRANSMEMBRANE PROTEIN 43.                                                                                                                         | QALSEVTAALR             | K        | E | 95.00% | 70   |                | 579.8298  | 2 | 3.0  | 414  | 424  | No  |  |  |  |  |  |
|          |                                       |         |                                                                                                                                                   | SGDTLLLLHHGDFSAEEVFHR   | K        | E | 95.00% | 41   |                | 595.8020  | 4 | 6.8  | 279  | 299  | No  |  |  |  |  |  |
| 941      | IPI00302329                           | MYH8    | MYOSIN-8.                                                                                                                                         | VIAR                    | R        | Q | 95.00% | 70   |                | 881.7913  | 3 | 6.3  | 241  | 266  | No  |  |  |  |  |  |
|          |                                       |         |                                                                                                                                                   | AAYLQSLNSADLLK          | K        | A | 95.00% | 105  |                | 753.9153  | 2 | 4.0  | 387  | 400  | Yes |  |  |  |  |  |
|          |                                       |         |                                                                                                                                                   | AAYLQSLNSADLLK          | K        | A | 95.00% | 74   |                | 502.9464  | 3 | 4.4  | 387  | 400  | Yes |  |  |  |  |  |
|          |                                       |         |                                                                                                                                                   | ADIAESQVNK              | R        | L | 95.00% | 81   |                | 537.7761  | 2 | 1.1  | 1913 | 1922 | Yes |  |  |  |  |  |
|          |                                       |         |                                                                                                                                                   | AGLLGLLEEMR             | K        | D | 95.00% | 81   |                | 609.3345  | 2 | 3.7  | 770  | 780  | Yes |  |  |  |  |  |
|          |                                       |         |                                                                                                                                                   | AGLLGLLEEMR             | K        | D | 95.00% | 94   |                | 601.3371  | 2 | 3.9  | 770  | 780  | Yes |  |  |  |  |  |
|          |                                       |         |                                                                                                                                                   | AGLLGLLEEMRDEK          | K        | L | 95.00% | 66   |                | 795.4192  | 2 | 5.9  | 770  | 783  | Yes |  |  |  |  |  |
|          |                                       |         |                                                                                                                                                   | AGLLGLLEEMRDEK          | K        | L | 95.00% | 47   |                | 530.6141  | 3 | 3.5  | 770  | 783  | Yes |  |  |  |  |  |
|          |                                       |         |                                                                                                                                                   | AGLLGLLEEMRDEK          | K        | L | 95.00% | 90   |                | 787.4214  | 2 | 5.6  | 770  | 783  | Yes |  |  |  |  |  |
|          |                                       |         |                                                                                                                                                   | AGLLGLLEEMRDEK          | K        | L | 95.00% | 48   |                | 525.2841  | 3 | 6.6  | 770  | 783  | Yes |  |  |  |  |  |
|          |                                       |         |                                                                                                                                                   | AITDAAMMAEELK           | K        | K | 95.00% | 84   |                | 713.3373  | 2 | 4.4  | 1761 | 1773 | Yes |  |  |  |  |  |
|          |                                       |         |                                                                                                                                                   | AITDAAMMAEELKK          | K        | E | 95.00% | 88   |                | 769.3863  | 2 | 2.6  | 1761 | 1774 | Yes |  |  |  |  |  |
|          |                                       |         |                                                                                                                                                   | AITDAAMMAEELKK          | K        | E | 95.00% | 44   |                | 513.2606  | 3 | 3.4  | 1761 | 1774 | Yes |  |  |  |  |  |
|          |                                       |         |                                                                                                                                                   | AITDAAMMAEELKK          | K        | E | 95.00% | 83   |                | 777.3834  | 2 | 2.2  | 1761 | 1774 | Yes |  |  |  |  |  |
|          |                                       |         |                                                                                                                                                   | AITDAAMMAEELKK          | K        | E | 95.00% | 39   |                | 518.5920  | 3 | 3.1  | 1761 | 1774 | Yes |  |  |  |  |  |
|          |                                       |         |                                                                                                                                                   | AITDAAMMAEELKK          | K        | E | 95.00% | 83   |                | 777.3834  | 2 | 2.2  | 1761 | 1774 | Yes |  |  |  |  |  |
|          |                                       |         |                                                                                                                                                   | AITDAAMMAEELKK          | K        | E | 95.00% | 39   |                | 518.5920  | 3 | 3.1  | 1761 | 1774 | Yes |  |  |  |  |  |
|          |                                       |         |                                                                                                                                                   | AITDAAMMAEELKK          | K        | E | 95.00% | 90   |                | 769.3892  | 2 | 6.4  | 1761 | 1774 | Yes |  |  |  |  |  |
|          |                                       |         |                                                                                                                                                   | AITDAAMMAEELKK          | K        | E | 95.00% | 52   |                | 513.2598  | 3 | 1.9  | 1761 | 1774 | Yes |  |  |  |  |  |
|          |                                       |         |                                                                                                                                                   | AITDAAMMAEELKK          | K        | E | 95.00% | 111  |                | 761.3883  | 2 | 1.9  | 1761 | 1774 | Yes |  |  |  |  |  |
|          |                                       |         |                                                                                                                                                   | AITDAAMMAEELKK          | K        | E | 95.00% | 77   |                | 507.9281  | 3 | 1.8  | 1761 | 1774 | Yes |  |  |  |  |  |
|          |                                       |         |                                                                                                                                                   | ANSEVAQWR               | K        | T | 95.00% | 51   |                | 1060.5220 | 1 | 4.5  | 1367 | 1375 | Yes |  |  |  |  |  |
|          |                                       |         |                                                                                                                                                   | ANSEVAQWR               | K        | T | 95.00% | 66   |                | 530.7642  | 2 | 2.9  | 1367 | 1375 | Yes |  |  |  |  |  |
|          |                                       |         |                                                                                                                                                   | DIDDLELTLAK             | K        | V | 95.00% | 54   |                | 1245.6670 | 1 | 7.2  | 956  | 966  | Yes |  |  |  |  |  |
|          |                                       |         |                                                                                                                                                   | DIDDLELTLAK             | K        | V | 95.00% | 99   |                | 623.3339  | 2 | 1.4  | 956  | 966  | Yes |  |  |  |  |  |
|          |                                       |         |                                                                                                                                                   | DLEEATLQHEAMVAALR       | R        | K | 95.00% | 53   |                | 948.9759  | 2 | -2.6 | 1180 | 1196 | Yes |  |  |  |  |  |
|          |                                       |         |                                                                                                                                                   | DLQHRLEAEQLALK          | K        | G | 95.00% | 52   |                | 889.9805  | 2 | 7.1  | 1795 | 1809 | Yes |  |  |  |  |  |
|          |                                       |         |                                                                                                                                                   | DLQHRLEAEQLALK          | K        | G | 95.00% | 58   |                | 593.6564  | 3 | 7.3  | 1795 | 1809 | Yes |  |  |  |  |  |
|          |                                       |         |                                                                                                                                                   | EAEFOK                  | R        | L | 95.00% | 31   |                | 751.3661  | 1 | 4.5  | 1171 | 1176 | No  |  |  |  |  |  |
|          |                                       |         |                                                                                                                                                   | EEQAEPDGTVEADK          | R        | A | 95.00% | 79   |                | 759.3370  | 2 | 3.5  | 373  | 386  | Yes |  |  |  |  |  |
|          |                                       |         |                                                                                                                                                   | EEQAEPDGTVEADKAAAYLQSLN |          |   |        |      |                |           |   |      |      |      |     |  |  |  |  |  |
|          |                                       |         |                                                                                                                                                   | SADLLK                  | R        | A | 95.00% | 84   |                | 1002.4970 | 3 | 5.4  | 373  | 400  | Yes |  |  |  |  |  |
|          |                                       |         |                                                                                                                                                   | ELEEISER                | R        | L | 95.00% | 48   |                | 1004.4960 | 1 | 6.0  | 1145 | 1152 | Yes |  |  |  |  |  |
| ELEEISER | R                                     | L       | 95.00%                                                                                                                                            | 38                      | 502.7501 | 2 | 2.4    | 1145 | 1152           | Yes       |   |      |      |      |     |  |  |  |  |  |

|                        |   |   |        |     |                               |           |   |      |      |      |     |
|------------------------|---|---|--------|-----|-------------------------------|-----------|---|------|------|------|-----|
| ELTYQTEEDRK            | K | N | 95.00% | 59  |                               | 706.3409  | 2 | 2.4  | 1852 | 1862 | Yes |
| EMATMKEEFQK            | K | T | 95.00% | 41  | M2: Oxidation                 | 694.3182  | 2 | 3.5  | 851  | 861  | Yes |
| EMATMKEEFQK            | K | T | 95.00% | 45  | M2: Oxidation                 | 702.3162  | 2 | 4.3  | 851  | 861  | Yes |
| EMATMKEEFQK            | K | T | 95.00% | 32  | M2: Oxidation                 | 468.5458  | 3 | 2.2  | 851  | 861  | Yes |
| EMATMKEEFQK            | K | T | 95.00% | 45  | M2: Oxidation, M5: Oxidation  | 702.3162  | 2 | 4.3  | 851  | 861  | Yes |
| EMATMKEEFQK            | K | T | 95.00% | 32  | M2: Oxidation, M5: Oxidation  | 468.5458  | 3 | 2.2  | 851  | 861  | Yes |
| EMATMKEEFQK            | K | T | 95.00% | 48  | M5: Oxidation                 | 694.3182  | 2 | 3.5  | 851  | 861  | No  |
| EMATMKEEFQK            | K | T | 95.00% | 56  |                               | 686.3207  | 2 | 3.4  | 851  | 861  | Yes |
| ENKNLQQEISDLTEQIAEGGK  | R | Q | 95.00% | 56  |                               | 782.0655  | 3 | 7.4  | 1504 | 1524 | No  |
| ENQSILITGESGAGK        | R | T | 95.00% | 113 |                               | 752.3880  | 2 | 1.7  | 173  | 187  | Yes |
| GQTVQQVYNAV GALAK      | K | A | 95.00% | 138 |                               | 823.9529  | 2 | 7.0  | 417  | 432  | Yes |
| GQTVQQVYNAV GALAK      | K | A | 95.00% | 73  |                               | 549.6364  | 3 | 4.2  | 417  | 432  | Yes |
| GSSFQTVSALFR           | K | E | 95.00% | 46  |                               | 1299.6800 | 1 | 7.8  | 644  | 655  | Yes |
| GSSFQTVSALFR           | K | E | 95.00% | 88  |                               | 650.3420  | 2 | 5.0  | 644  | 655  | Yes |
| GSSFQTVSALFR           | K | E | 95.00% | 40  |                               | 433.8968  | 3 | 3.9  | 644  | 655  | Yes |
| HADSM AELGEQIDNLRQ     | K | V | 95.00% | 47  |                               | 963.9618  | 2 | 9.1  | 1199 | 1215 | No  |
| IAEKDEEIDQLK           | K | R | 95.00% | 87  |                               | 715.8757  | 2 | 3.8  | 1579 | 1590 | Yes |
| IAEKDEEIDQLK           | K | R | 95.00% | 45  |                               | 477.5863  | 3 | 3.5  | 1579 | 1590 | Yes |
| IAEKDEEIDQLKR          | K | N | 95.00% | 95  |                               | 793.9271  | 2 | 4.4  | 1579 | 1591 | Yes |
| IAEKDEEIDQLKR          | K | N | 95.00% | 74  |                               | 529.6190  | 3 | 1.3  | 1579 | 1591 | Yes |
| IAEQELLDASER           | K | V | 95.00% | 84  |                               | 687.3519  | 2 | 3.4  | 1704 | 1715 | Yes |
| IEAQNKPFD AK           | R | T | 95.00% | 33  |                               | 630.8347  | 2 | 1.9  | 27   | 37   | Yes |
| IKELQAR                | K | I | 95.00% | 31  |                               | 429.2654  | 2 | 2.3  | 1111 | 1117 | Yes |
| IKEVTER                | K | A | 95.00% | 35  |                               | 437.7546  | 2 | 1.7  | 922  | 928  | Yes |
| INQLDTK                | R | Q | 95.00% | 55  |                               | 480.2638  | 2 | 3.6  | 446  | 453  | Yes |
| IQLEAK                 | K | I | 95.00% | 37  |                               | 701.4219  | 1 | 2.9  | 916  | 921  | Yes |
| IQLELNQVK              | R | S | 95.00% | 46  |                               | 1084.6430 | 1 | 5.9  | 1564 | 1572 | Yes |
| IQLELNQVK              | R | S | 95.00% | 70  |                               | 542.8231  | 2 | 1.5  | 1564 | 1572 | Yes |
| KAITDAAMMAEELKK        | K | E | 95.00% | 101 | M8: Oxidation                 | 833.4363  | 2 | 5.3  | 1760 | 1774 | Yes |
| KAITDAAMMAEELKK        | K | E | 95.00% | 69  | M8: Oxidation                 | 555.9593  | 3 | 3.8  | 1760 | 1774 | Yes |
| KAITDAAMMAEELKK        | K | E | 95.00% | 34  | M8: Oxidation                 | 417.2206  | 4 | 2.0  | 1760 | 1774 | Yes |
| KAITDAAMMAEELKK        | K | E | 95.00% | 80  | M8: Oxidation                 | 841.4315  | 2 | 2.7  | 1760 | 1774 | Yes |
| KAITDAAMMAEELKK        | K | E | 95.00% | 58  | M8: Oxidation                 | 561.2901  | 3 | 2.4  | 1760 | 1774 | Yes |
| KAITDAAMMAEELKK        | K | E | 95.00% | 80  | M8: Oxidation, M9: Oxidation  | 841.4315  | 2 | 2.7  | 1760 | 1774 | Yes |
| KAITDAAMMAEELKK        | K | E | 95.00% | 58  | M8: Oxidation, M9: Oxidation  | 561.2901  | 3 | 2.4  | 1760 | 1774 | Yes |
| KAITDAAMMAEELKK        | K | E | 95.00% | 73  | M9: Oxidation                 | 833.4340  | 2 | 2.6  | 1760 | 1774 | Yes |
| KAITDAAMMAEELKK        | K | E | 95.00% | 59  | M9: Oxidation                 | 555.9584  | 3 | 2.3  | 1760 | 1774 | Yes |
| KAITDAAMMAEELKK        | K | E | 95.00% | 107 |                               | 825.4387  | 2 | 5.2  | 1760 | 1774 | Yes |
| KAITDAAMMAEELKK        | K | E | 95.00% | 92  |                               | 550.6276  | 3 | 3.8  | 1760 | 1774 | Yes |
| KAITDAAMMAEELKK        | K | E | 95.00% | 42  |                               | 413.2216  | 4 | 1.3  | 1760 | 1774 | Yes |
| KDIDDLLETLAK           | K | V | 95.00% | 93  |                               | 687.3838  | 2 | 4.8  | 955  | 966  | Yes |
| KDIDDLLETLAK           | K | V | 95.00% | 43  |                               | 458.5912  | 3 | 3.3  | 955  | 966  | Yes |
| KGSSFQTVSALFR          | K | E | 95.00% | 125 |                               | 714.3884  | 2 | 3.1  | 643  | 655  | Yes |
| KGSSFQTVSALFR          | K | E | 95.00% | 56  |                               | 476.5944  | 3 | 2.1  | 643  | 655  | Yes |
| KIAEQELLDASER          | R | V | 95.00% | 123 |                               | 751.3984  | 2 | 1.7  | 1703 | 1715 | Yes |
| KIAEQELLDASER          | R | V | 95.00% | 62  |                               | 501.2687  | 3 | 2.7  | 1703 | 1715 | Yes |
| KKGSSFQTVSALFR         | K | E | 95.00% | 46  |                               | 519.2935  | 3 | 3.4  | 642  | 655  | Yes |
| KKMEGDLNEMEIQLNHANR    | K | L | 95.00% | 39  | M10: Oxidation                | 762.7066  | 3 | 3.1  | 1619 | 1637 | No  |
| KKMEGDLNEMEIQLNHANR    | K | L | 95.00% | 36  | M10: Oxidation                | 572.2819  | 4 | 3.0  | 1619 | 1637 | No  |
| KKMEGDLNEMEIQLNHANR    | K | L | 95.00% | 70  | M3: Oxidation                 | 762.7065  | 3 | 3.0  | 1619 | 1637 | No  |
| KKMEGDLNEMEIQLNHANR    | K | L | 95.00% | 77  | M3: Oxidation                 | 572.2819  | 4 | 3.1  | 1619 | 1637 | No  |
| KKMEGDLNEMEIQLNHANR    | K | L | 95.00% | 58  | M3: Oxidation                 | 768.0369  | 3 | 1.3  | 1619 | 1637 | No  |
| KKMEGDLNEMEIQLNHANR    | K | L | 95.00% | 50  | M3: Oxidation                 | 576.2795  | 4 | 1.2  | 1619 | 1637 | No  |
| KKMEGDLNEMEIQLNHANR    | K | L | 95.00% | 58  | M3: Oxidation, M10: Oxidation | 768.0369  | 3 | 1.3  | 1619 | 1637 | No  |
| KKMEGDLNEMEIQLNHANR    | K | L | 95.00% | 50  | M10: Oxidation                | 576.2795  | 4 | 1.2  | 1619 | 1637 | No  |
| KKMEGDLNEMEIQLNHANR    | K | L | 95.00% | 53  |                               | 757.3764  | 3 | 4.9  | 1619 | 1637 | No  |
| KKMEGDLNEMEIQLNHANR    | K | L | 95.00% | 60  |                               | 568.2845  | 4 | 5.5  | 1619 | 1637 | No  |
| KLEGDLK                | R | L | 95.00% | 37  |                               | 401.7387  | 2 | 2.3  | 1057 | 1063 | Yes |
| KLQHELEEAER            | R | A | 95.00% | 77  |                               | 755.8810  | 2 | 2.5  | 1901 | 1912 | Yes |
| KLQHELEEAER            | R | A | 95.00% | 59  |                               | 504.2543  | 3 | -2.0 | 1901 | 1912 | Yes |
| KLQHELEEAERADIAESQV NK | R | L | 95.00% | 93  |                               | 1283.6470 | 2 | 4.3  | 1901 | 1922 | Yes |
| KLQHELEEAERADIAESQV NK | R | L | 95.00% | 43  |                               | 856.1024  | 3 | 6.4  | 1901 | 1922 | Yes |

|                         |   |   |        |     |                               |           |   |     |      |      |     |
|-------------------------|---|---|--------|-----|-------------------------------|-----------|---|-----|------|------|-----|
| KLQHELEEAERADIAESQVNK   | R | L | 95.00% | 61  |                               | 642.3271  | 4 | 3.9 | 1901 | 1922 | Yes |
| KMEGDLNEMEIQLNHANR      | K | L | 95.00% | 74  | M2: Oxidation                 | 720.0091  | 3 | 4.4 | 1620 | 1637 | No  |
| KMEGDLNEMEIQLNHANR      | K | L | 95.00% | 50  | M2: Oxidation                 | 540.2582  | 4 | 3.3 | 1620 | 1637 | No  |
| KMEGDLNEMEIQLNHANR      | K | L | 95.00% | 66  | M2: Oxidation                 | 1087.5070 | 2 | 4.4 | 1620 | 1637 | No  |
| KMEGDLNEMEIQLNHANR      | K | L | 95.00% | 50  | M2: Oxidation                 | 725.3399  | 3 | 3.3 | 1620 | 1637 | No  |
| KMEGDLNEMEIQLNHANR      | K | L | 95.00% | 50  | M2: Oxidation                 | 544.2559  | 4 | 1.3 | 1620 | 1637 | No  |
| KMEGDLNEMEIQLNHANR      | K | L | 95.00% | 66  | M2: Oxidation, M9: Oxidation  | 1087.5070 | 2 | 4.4 | 1620 | 1637 | No  |
| KMEGDLNEMEIQLNHANR      | K | L | 95.00% | 50  | M2: Oxidation, M9: Oxidation  | 725.3399  | 3 | 3.3 | 1620 | 1637 | No  |
| KMEGDLNEMEIQLNHANR      | K | L | 95.00% | 50  | M2: Oxidation, M9: Oxidation  | 544.2559  | 4 | 1.3 | 1620 | 1637 | No  |
| KMEGDLNEMEIQLNHANR      | K | L | 95.00% | 69  | M9: Oxidation                 | 1079.5140 | 2 | 8.5 | 1620 | 1637 | No  |
| KMEGDLNEMEIQLNHANR      | K | L | 95.00% | 67  | M9: Oxidation                 | 720.0086  | 3 | 3.7 | 1620 | 1637 | No  |
| KMEGDLNEMEIQLNHANR      | K | L | 95.00% | 36  | M9: Oxidation                 | 540.2574  | 4 | 1.8 | 1620 | 1637 | No  |
| KMEGDLNEMEIQLNHANR      | K | L | 95.00% | 113 |                               | 1071.5160 | 2 | 8.2 | 1620 | 1637 | No  |
| KMEGDLNEMEIQLNHANR      | K | L | 95.00% | 89  |                               | 714.6783  | 3 | 5.6 | 1620 | 1637 | No  |
| KMEGDLNEMEIQLNHANR      | K | L | 95.00% | 59  |                               | 536.2598  | 4 | 4.0 | 1620 | 1637 | No  |
| KRQEAPPHIFSISDNAYQFMLTD | R |   |        |     |                               |           |   |     |      |      |     |
| KRQEAPPHIFSISDNAYQFMLTD | K | E | 95.00% | 35  | M20: Oxidation                | 960.8145  | 3 | 6.2 | 149  | 172  | Yes |
| KRQEAPPHIFSISDNAYQFMLTD | K | E | 95.00% | 97  |                               | 955.4839  | 3 | 7.2 | 149  | 172  | Yes |
| LAQIITR                 | K | T | 95.00% | 37  |                               | 814.5181  | 1 | 3.6 | 784  | 790  | No  |
| LAQIITR                 | K | T | 95.00% | 59  |                               | 407.7621  | 2 | 1.4 | 784  | 790  | No  |
| LASADIETYLLEK           | K | S | 95.00% | 129 |                               | 733.3953  | 2 | 2.4 | 261  | 273  | Yes |
| LASADIETYLLEK           | K | S | 95.00% | 64  |                               | 489.2677  | 3 | 5.7 | 261  | 273  | Yes |
| LDEAEQLALK              | R | G | 95.00% | 43  |                               | 1129.6160 | 1 | 4.8 | 1800 | 1809 | Yes |
| LDEAEQLALK              | R | G | 95.00% | 97  |                               | 565.3106  | 2 | 2.4 | 1800 | 1809 | Yes |
| LDEAEQLALKGGK           | R | K | 95.00% | 53  |                               | 686.3796  | 2 | 2.0 | 1800 | 1812 | Yes |
| LEQQVDDLEGSLEQEK        | K | K | 95.00% | 144 |                               | 930.4526  | 2 | 5.2 | 1030 | 1045 | Yes |
| LEQQVDDLEGSLEQEK        | K | K | 95.00% | 96  |                               | 620.6370  | 3 | 4.2 | 1030 | 1045 | Yes |
| LEQQVDDLEGSLEQEK        | K | L | 95.00% | 112 |                               | 994.5015  | 2 | 6.3 | 1030 | 1046 | Yes |
| LEQQVDDLEGSLEQEK        | K | L | 95.00% | 54  |                               | 663.3357  | 3 | 4.5 | 1030 | 1046 | Yes |
| LINDLTAQR               | R | A | 95.00% | 51  |                               | 1043.5890 | 1 | 3.9 | 1272 | 1280 | Yes |
| LINDLTAQR               | R | A | 95.00% | 89  |                               | 522.2970  | 2 | 1.1 | 1272 | 1280 | Yes |
| LQDLVDK                 | R | L | 95.00% | 32  |                               | 415.7358  | 2 | 1.5 | 1867 | 1873 | Yes |
| LQDLVDKLOAK             | R | V | 95.00% | 85  |                               | 635.8749  | 2 | 3.7 | 1867 | 1877 | Yes |
| LQDLVDKLOAK             | R | V | 95.00% | 50  |                               | 424.2519  | 3 | 2.1 | 1867 | 1877 | Yes |
| LQHELEEAER              | K | A | 95.00% | 68  |                               | 691.8333  | 2 | 2.6 | 1902 | 1912 | Yes |
| LQHELEEAER              | K | A | 95.00% | 55  |                               | 461.5579  | 3 | 2.0 | 1902 | 1912 | Yes |
| LQHELEEAERADIAESQVNK    | K | L | 95.00% | 114 |                               | 1219.6040 | 2 | 8.0 | 1902 | 1922 | Yes |
| LQHELEEAERADIAESQVNK    | K | L | 95.00% | 59  |                               | 813.4023  | 3 | 4.6 | 1902 | 1922 | Yes |
| LQHELEEAERADIAESQVNK    | K | L | 95.00% | 50  |                               | 610.3027  | 4 | 3.1 | 1902 | 1922 | Yes |
| LQNEVEDLMLDVER          | R | S | 95.00% | 122 | M9: Oxidation                 | 859.9222  | 2 | 5.5 | 1424 | 1437 | No  |
| LQNEVEDLMLDVER          | R | S | 95.00% | 86  | M9: Oxidation                 | 573.6165  | 3 | 3.8 | 1424 | 1437 | No  |
| LQNEVEDLMLDVER          | R | S | 95.00% | 115 |                               | 851.9251  | 2 | 5.9 | 1424 | 1437 | No  |
| LQNEVEDLMLDVER          | R | S | 95.00% | 75  |                               | 568.2850  | 3 | 4.2 | 1424 | 1437 | No  |
| LQQFFNHMFVLEQEEYK       | K | K | 95.00% | 58  | M9: Oxidation                 | 795.0480  | 3 | 4.4 | 488  | 505  | Yes |
| LQQFFNHMFVLEQEEYK       | K | K | 95.00% | 41  |                               | 789.7194  | 3 | 8.3 | 488  | 505  | Yes |
| LQQFFNHMFVLEQEEYK       | K | E | 95.00% | 48  | M9: Oxidation                 | 837.7477  | 3 | 5.8 | 488  | 506  | Yes |
| LQQFFNHMFVLEQEEYK       | K | E | 95.00% | 103 |                               | 1248.1230 | 2 | 8.3 | 488  | 506  | Yes |
| LQQFFNHMFVLEQEEYK       | K | E | 95.00% | 57  |                               | 832.4158  | 3 | 5.6 | 488  | 506  | Yes |
| LQQFFNHMFVLEQEEYK       | K | E | 95.00% | 35  |                               | 499.8518  | 5 | 3.9 | 488  | 506  | Yes |
| LTGAVMHYGNMK            | K | F | 95.00% | 72  | M11: Oxidation                | 669.3234  | 2 | 3.3 | 355  | 366  | Yes |
| LTGAVMHYGNMK            | K | F | 95.00% | 64  | M6: Oxidation                 | 669.3222  | 2 | 1.5 | 355  | 366  | Yes |
| LTGAVMHYGNMK            | K | F | 95.00% | 62  | M6: Oxidation                 | 677.3207  | 2 | 3.1 | 355  | 366  | Yes |
| LTGAVMHYGNMK            | K | F | 95.00% | 62  | M6: Oxidation, M11: Oxidation | 677.3207  | 2 | 3.1 | 355  | 366  | Yes |
| LTGAVMHYGNMK            | K | F | 95.00% | 61  |                               | 661.3256  | 2 | 2.7 | 355  | 366  | Yes |
| LYDQHLGK                | K | S | 95.00% | 55  |                               | 487.2609  | 2 | 3.1 | 555  | 562  | Yes |
| MEGDLNEMEIQLNHANR       | K | L | 95.00% | 108 | M1: Oxidation                 | 1015.4620 | 2 | 4.5 | 1621 | 1637 | No  |
| MEGDLNEMEIQLNHANR       | K | L | 95.00% | 73  | M1: Oxidation                 | 677.3097  | 3 | 3.1 | 1621 | 1637 | No  |
| MEGDLNEMEIQLNHANR       | K | L | 95.00% | 77  | M1: Oxidation                 | 1023.4590 | 2 | 4.2 | 1621 | 1637 | No  |
| MEGDLNEMEIQLNHANR       | K | L | 95.00% | 71  | M1: Oxidation                 | 682.6416  | 3 | 3.5 | 1621 | 1637 | No  |
| MEGDLNEMEIQLNHANR       | K | L | 95.00% | 77  | M1: Oxidation, M8: Oxidation  | 1023.4590 | 2 | 4.2 | 1621 | 1637 | No  |
| MEGDLNEMEIQLNHANR       | K | L | 95.00% | 71  | M1: Oxidation, M8: Oxidation  | 682.6416  | 3 | 3.5 | 1621 | 1637 | No  |
| MEGDLNEMEIQLNHANR       | K | L | 95.00% | 89  | M8: Oxidation                 | 1015.4640 | 2 | 6.8 | 1621 | 1637 | No  |

|                         |   |   |        |     |                                               |           |   |      |      |      |     |
|-------------------------|---|---|--------|-----|-----------------------------------------------|-----------|---|------|------|------|-----|
| MEGDLNEMEIQLNHANR       | K | L | 95.00% | 45  | M8: Oxidation                                 | 677.3091  | 3 | 2.3  | 1621 | 1637 | No  |
| MEGDLNEMEIQLNHANR       | K | L | 95.00% | 124 |                                               | 1007.4680 | 2 | 8.1  | 1621 | 1637 | No  |
| MEGDLNEMEIQLNHANR       | K | L | 95.00% | 77  |                                               | 671.9785  | 3 | 3.8  | 1621 | 1637 | No  |
| MFLWMVTR                | K | I | 95.00% | 43  | M1: Oxidation                                 | 550.2784  | 2 | 5.2  | 438  | 445  | Yes |
| MFLWMVTR                | K | I | 95.00% | 50  | M1: Oxidation                                 | 558.2754  | 2 | 4.4  | 438  | 445  | Yes |
| MFLWMVTR                | K | I | 95.00% | 50  | M1: Oxidation, M5: Oxidation                  | 558.2754  | 2 | 4.4  | 438  | 445  | Yes |
| MFLWMVTR                | K | I | 95.00% | 50  | M5: Oxidation                                 | 550.2784  | 2 | 5.2  | 438  | 445  | Yes |
| MFLWMVTR                | K | I | 95.00% | 41  |                                               | 542.2811  | 2 | 5.5  | 438  | 445  | Yes |
| MQGTLEDQIISANPLLEAFGNAK | K | T | 95.00% | 129 | M1: Oxidation                                 | 1238.6320 | 2 | 6.9  | 215  | 237  | Yes |
| MQGTLEDQIISANPLLEAFGNAK | K | T | 95.00% | 101 | M1: Oxidation                                 | 826.0912  | 3 | 7.5  | 215  | 237  | Yes |
| MVTLK                   | K | E | 95.00% | 37  |                                               | 704.4404  | 1 | 3.2  | 880  | 885  | Yes |
| NALAHALQSSR             | K | H | 95.00% | 52  |                                               | 1167.6270 | 1 | 3.0  | 1330 | 1340 | Yes |
| NALAHALQSSR             | K | H | 95.00% | 94  |                                               | 584.3176  | 2 | 3.3  | 1330 | 1340 | Yes |
| NLQQEISDLTEQIAEGGK      | K | Q | 95.00% | 159 |                                               | 987.0016  | 2 | 6.3  | 1507 | 1524 | No  |
| NLQQEISDLTEQIAEGGK      | K | Q | 95.00% | 98  |                                               | 658.3360  | 3 | 4.8  | 1507 | 1524 | No  |
| NLTEEMAGLDETIK          | K | L | 95.00% | 121 | M6: Oxidation                                 | 825.9019  | 2 | 3.6  | 980  | 994  | Yes |
| NLTEEMAGLDETIK          | K | L | 95.00% | 66  | M6: Oxidation                                 | 550.9374  | 3 | 4.0  | 980  | 994  | Yes |
| NLTEEMAGLDETIK          | K | L | 95.00% | 131 |                                               | 817.9053  | 2 | 4.7  | 980  | 994  | Yes |
| NLTEEMAGLDETIK          | K | L | 95.00% | 77  |                                               | 545.6058  | 3 | 4.2  | 980  | 994  | Yes |
| NTQGILK                 | R | E | 95.00% | 33  |                                               | 773.4540  | 1 | 2.2  | 1648 | 1654 | No  |
| QEAPPHIFSISDNAYQFMLTDR  | R | E | 95.00% | 103 | M18: Oxidation                                | 866.0826  | 3 | 7.0  | 151  | 172  | Yes |
| QEAPPHIFSISDNAYQFMLTDR  | R | E | 95.00% | 81  |                                               | 860.7453  | 3 | 0.4  | 151  | 172  | Yes |
| QREEQAEPDGEVADK         | K | A | 95.00% | 94  |                                               | 901.4185  | 2 | 4.7  | 371  | 386  | Yes |
| QREEQAEPDGEVADK         | K | A | 95.00% | 54  |                                               | 601.2800  | 3 | 2.1  | 371  | 386  | Yes |
| QREEQAEPDGEVADKAAAYLQS  |   |   |        |     |                                               |           |   |      |      |      |     |
| LNSADLLK                | K | A | 95.00% | 96  |                                               | 1097.2200 | 3 | 7.7  | 371  | 400  | Yes |
| QRLQNEVEDLMLDVER        | K | S | 95.00% | 64  |                                               | 663.0079  | 3 | 8.0  | 1422 | 1437 | No  |
| QVEQEKCEIQAALEEAASLEHE  |   |   |        |     |                                               |           |   |      |      |      |     |
| EGK                     | K | I | 95.00% | 90  |                                               | 976.4582  | 3 | 0.4  | 1535 | 1560 | No  |
| RQEAPPHIFSISDNAYQFMLTDR | K | E | 95.00% | 104 | M19: Oxidation                                | 918.1191  | 3 | 9.7  | 150  | 172  | Yes |
| RQEAPPHIFSISDNAYQFMLTDR | K | E | 95.00% | 34  | M19: Oxidation                                | 688.8396  | 4 | 7.2  | 150  | 172  | Yes |
| RQEAPPHIFSISDNAYQFMLTDR | K | E | 95.00% | 111 |                                               | 912.7822  | 3 | 3.9  | 150  | 172  | Yes |
| RQEAPPHIFSISDNAYQFMLTDR |   |   |        |     |                                               |           |   |      |      |      |     |
| ENQSILITGESGAGK         | K | T | 95.00% | 66  | M19: Oxidation                                | 1060.0300 | 4 | 7.6  | 150  | 187  | Yes |
| RVIQYFATIAVTGEK         | K | K | 95.00% | 106 |                                               | 848.4809  | 2 | 6.2  | 193  | 207  | Yes |
| RVIQYFATIAVTGEK         | K | K | 95.00% | 71  |                                               | 565.9888  | 3 | 4.3  | 193  | 207  | Yes |
| SAETEKEMATMK            | K | E | 95.00% | 40  | M11: Oxidation                                | 686.3135  | 2 | 4.0  | 845  | 856  | Yes |
| SAETEKEMATMK            | K | E | 95.00% | 68  |                                               | 678.3158  | 2 | 3.6  | 845  | 856  | Yes |
| SAETEKEMATMKKEEFQK      | K | T | 95.00% | 83  | M11: Oxidation                                | 1016.9680 | 2 | 4.0  | 845  | 861  | Yes |
| SAETEKEMATMKKEEFQK      | K | T | 95.00% | 39  | M11: Oxidation                                | 678.3148  | 3 | 3.8  | 845  | 861  | Yes |
| SAETEKEMATMKKEEFQK      | K | T | 95.00% | 75  | M8: Oxidation                                 | 1016.9690 | 2 | 4.3  | 845  | 861  | Yes |
| SAETEKEMATMKKEEFQK      | K | T | 95.00% | 33  | M8: Oxidation                                 | 678.3148  | 3 | 3.8  | 845  | 861  | No  |
| SAETEKEMATMKKEEFQK      | K | T | 95.00% | 75  | M8: Oxidation                                 | 1024.9670 | 2 | 5.5  | 845  | 861  | Yes |
| SAETEKEMATMKKEEFQK      | K | T | 95.00% | 51  | M8: Oxidation                                 | 683.6451  | 3 | 1.9  | 845  | 861  | Yes |
| SAETEKEMATMKKEEFQK      | K | T | 95.00% | 75  | M11: Oxidation, M8: Oxidation, M11: Oxidation | 1024.9670 | 2 | 5.5  | 845  | 861  | Yes |
| SAETEKEMATMKKEEFQK      | K | T | 95.00% | 51  | M11: Oxidation                                | 683.6451  | 3 | 1.9  | 845  | 861  | Yes |
| SAETEKEMATMKKEEFQK      | K | T | 95.00% | 96  |                                               | 1008.9730 | 2 | 6.2  | 845  | 861  | Yes |
| SAETEKEMATMKKEEFQK      | K | T | 95.00% | 47  |                                               | 672.9822  | 3 | 2.5  | 845  | 861  | Yes |
| SANFQKPK                | K | V | 95.00% | 43  |                                               | 460.2563  | 2 | 4.9  | 563  | 570  | Yes |
| SLSTELFK                | R | V | 95.00% | 34  |                                               | 924.5073  | 1 | 3.2  | 1479 | 1486 | No  |
| SLSTELFK                | R | V | 95.00% | 65  |                                               | 462.7567  | 2 | 1.5  | 1479 | 1486 | No  |
| SYHIFYQITSNK            | R | K | 95.00% | 87  |                                               | 750.8779  | 2 | -0.5 | 285  | 296  | Yes |
| SYHIFYQITSNK            | R | K | 95.00% | 43  |                                               | 500.9233  | 3 | 3.7  | 285  | 296  | Yes |
| TEELEEAkk               | R | K | 95.00% | 37  |                                               | 538.7814  | 2 | 6.8  | 1386 | 1394 | Yes |
| TKYETDAIQR              | R | T | 95.00% | 69  |                                               | 612.8162  | 2 | 1.6  | 1376 | 1385 | Yes |
| TKYETDAIQR              | R | T | 95.00% | 46  |                                               | 408.8804  | 3 | 2.4  | 1376 | 1385 | Yes |
| TKYETDAIQRTEELEEAk      | R | K | 95.00% | 37  |                                               | 718.6936  | 3 | 3.9  | 1376 | 1393 | Yes |
| TPGAMEHELVLHQLR         | K | C | 95.00% | 65  | M5: Oxidation                                 | 873.9549  | 2 | 3.3  | 683  | 697  | Yes |
| TPGAMEHELVLHQLR         | K | C | 95.00% | 71  | M5: Oxidation                                 | 582.9729  | 3 | 3.9  | 683  | 697  | Yes |
| TPGAMEHELVLHQLR         | K | C | 95.00% | 35  | M5: Oxidation                                 | 437.4808  | 4 | 2.1  | 683  | 697  | Yes |
| TPGAMEHELVLHQLR         | K | C | 95.00% | 109 |                                               | 865.9571  | 2 | 2.9  | 683  | 697  | Yes |
| TPGAMEHELVLHQLR         | K | C | 95.00% | 71  |                                               | 577.6407  | 3 | 3.0  | 683  | 697  | Yes |

|     |                                                    |          |                                |                                                                                                                                                                                                                                                                                    |   |   |        |     |          |   |     |      |      |     |
|-----|----------------------------------------------------|----------|--------------------------------|------------------------------------------------------------------------------------------------------------------------------------------------------------------------------------------------------------------------------------------------------------------------------------|---|---|--------|-----|----------|---|-----|------|------|-----|
|     |                                                    |          |                                | TPGAMEHELVLHQLR                                                                                                                                                                                                                                                                    | K | C | 95.00% | 45  | 433.4824 | 4 | 2.8 | 683  | 697  | Yes |
|     |                                                    |          |                                | TSVFAEPK                                                                                                                                                                                                                                                                           | K | E | 95.00% | 36  | 977.5336 | 1 | 2.9 | 38   | 46   | Yes |
|     |                                                    |          |                                | TSVFAEPK                                                                                                                                                                                                                                                                           | K | E | 95.00% | 71  | 489.2706 | 2 | 2.6 | 38   | 46   | Yes |
|     |                                                    |          |                                | VGNEYVTK                                                                                                                                                                                                                                                                           | K | G | 95.00% | 69  | 455.2391 | 2 | 2.3 | 409  | 416  | Yes |
|     |                                                    |          |                                | VIQYFATIAVTGEK                                                                                                                                                                                                                                                                     | R | K | 95.00% | 132 | 770.4273 | 2 | 2.9 | 194  | 207  | Yes |
|     |                                                    |          |                                | VIQYFATIAVTGEK                                                                                                                                                                                                                                                                     | R | K | 95.00% | 81  | 513.9551 | 3 | 4.8 | 194  | 207  | Yes |
|     |                                                    |          |                                | VKELTYQTEEDRK                                                                                                                                                                                                                                                                      | R | N | 95.00% | 84  | 819.9244 | 2 | 4.2 | 1850 | 1862 | Yes |
|     |                                                    |          |                                | VKELTYQTEEDRK                                                                                                                                                                                                                                                                      | R | N | 95.00% | 58  | 546.9517 | 3 | 3.3 | 1850 | 1862 | Yes |
|     |                                                    |          |                                | VKELTYQTEEDRK                                                                                                                                                                                                                                                                      | R | N | 95.00% | 40  | 410.4650 | 4 | 1.6 | 1850 | 1862 | Yes |
|     |                                                    |          |                                | VKNLTEEMAGLDETIAK                                                                                                                                                                                                                                                                  | K | L | 95.00% | 34  | 626.6595 | 3 | 5.1 | 978  | 994  | Yes |
|     |                                                    |          |                                | VKNLTEEMAGLDETIAK                                                                                                                                                                                                                                                                  | K | L | 95.00% | 136 | 931.4893 | 2 | 6.6 | 978  | 994  | Yes |
|     |                                                    |          |                                | VKNLTEEMAGLDETIAK                                                                                                                                                                                                                                                                  | K | L | 95.00% | 61  | 621.3281 | 3 | 5.5 | 978  | 994  | Yes |
|     |                                                    |          |                                | VKVGNEYVTK                                                                                                                                                                                                                                                                         | R | G | 95.00% | 53  | 568.8211 | 2 | 2.5 | 407  | 416  | Yes |
|     |                                                    |          |                                | VLNASAIPEGQFIDSK                                                                                                                                                                                                                                                                   | K | K | 95.00% | 113 | 844.9516 | 2 | 5.5 | 727  | 742  | Yes |
|     |                                                    |          |                                | VLNASAIPEGQFIDSK                                                                                                                                                                                                                                                                   | K | K | 95.00% | 70  | 563.6371 | 3 | 5.8 | 727  | 742  | Yes |
|     |                                                    |          |                                | VLNASAIPEGQFIDSKK                                                                                                                                                                                                                                                                  | K | A | 95.00% | 87  | 909.0000 | 2 | 6.1 | 727  | 743  | Yes |
|     |                                                    |          |                                | VLNASAIPEGQFIDSKK                                                                                                                                                                                                                                                                  | K | A | 95.00% | 51  | 606.3344 | 3 | 3.6 | 727  | 743  | Yes |
|     |                                                    |          |                                | VQLLHTQNTSLINTK                                                                                                                                                                                                                                                                    | R | K | 95.00% | 111 | 855.4861 | 2 | 5.4 | 1716 | 1730 | Yes |
|     |                                                    |          |                                | VQLLHTQNTSLINTK                                                                                                                                                                                                                                                                    | R | K | 95.00% | 74  | 570.6585 | 3 | 2.8 | 1716 | 1730 | Yes |
|     |                                                    |          |                                | VQLLHTQNTSLINTK                                                                                                                                                                                                                                                                    | R | K | 95.00% | 102 | 919.5307 | 2 | 1.9 | 1716 | 1731 | Yes |
|     |                                                    |          |                                | VQLLHTQNTSLINTK                                                                                                                                                                                                                                                                    | R | K | 95.00% | 62  | 613.3572 | 3 | 3.3 | 1716 | 1731 | Yes |
|     |                                                    |          |                                | VVETMQSTLDAEIR                                                                                                                                                                                                                                                                     | R | S | 95.00% | 44  | 804.4082 | 2 | 8.4 | 1596 | 1609 | No  |
|     |                                                    |          |                                | VVETMQSTLDAEIR                                                                                                                                                                                                                                                                     | R | S | 95.00% | 39  | 796.4103 | 2 | 7.9 | 1596 | 1609 | No  |
|     |                                                    |          |                                | YKVLNASAIPEGQFIDSK                                                                                                                                                                                                                                                                 | R | K | 95.00% | 50  | 660.6903 | 3 | 5.4 | 725  | 742  | Yes |
|     |                                                    |          |                                | YKVLNASAIPEGQFIDSKK                                                                                                                                                                                                                                                                | R | A | 95.00% | 78  | 703.3875 | 3 | 3.7 | 725  | 743  | Yes |
| 942 | IPI00303335                                        | NEB      | NEBULIN.                       | ENLGTGIPTTVTPPIER                                                                                                                                                                                                                                                                  | K | V | 95.00% | 56  | 913.9846 | 2 | 6.1 | 6218 | 6234 | Yes |
|     |                                                    |          |                                | ITVVQDTPPIER                                                                                                                                                                                                                                                                       | K | V | 95.00% | 70  | 692.3977 | 2 | 1.9 | 6130 | 6141 | Yes |
|     |                                                    |          |                                | NQENFSSVLYK                                                                                                                                                                                                                                                                        | R | E | 95.00% | 46  | 664.8309 | 2 | 4.1 | 6238 | 6248 | No  |
|     |                                                    |          |                                | DLVVAYGTTENSPTVFAHFPEDT                                                                                                                                                                                                                                                            |   |   |        |     |          |   |     |      |      |     |
| 943 | IPI00304071                                        | FLJ20920 | HYPOTHETICAL PROTEIN FLJ20920. | VEQK                                                                                                                                                                                                                                                                               | K | A | 95.00% | 36  | 998.8259 | 3 | 8.4 | 403  | 429  | No  |
|     |                                                    |          |                                | GATLSHYNIVNNSNILGER                                                                                                                                                                                                                                                                | K | L | 95.00% | 36  | 691.3586 | 3 | 3.8 | 272  | 290  | No  |
| 944 | IPI00334190                                        | STOML2   | STOMATIN-LIKE PROTEIN 2.       | APVPGTSDLSGSSSR                                                                                                                                                                                                                                                                    | K | D | 95.00% | 45  | 757.8771 | 2 | 0.9 | 322  | 337  | No  |
|     |                                                    |          |                                | ILEPGLNILPVLDR                                                                                                                                                                                                                                                                     | R | I | 95.00% | 87  | 838.0195 | 2 | 9.0 | 58   | 72   | No  |
| 945 | IPI00375333                                        | RRAD     | GTP-BINDING PROTEIN RAD.       | IFGGVEDGPEAEAAGHTYDR                                                                                                                                                                                                                                                               | R | S | 95.00% | 50  | 697.6555 | 3 | 4.2 | 110  | 129  | No  |
|     |                                                    |          |                                | VLLLGAPGVGK                                                                                                                                                                                                                                                                        | K | S | 95.00% | 43  | 512.3347 | 2 | 4.5 | 94   | 104  | No  |
|     |                                                    |          |                                | ISOFORM 1 OF EUKARYOTIC TRANSLATION INITIATION FACTOR 3 SUBUNIT 9.; ISOFORM 2 OF EUKARYOTIC TRANSLATION INITIATION FACTOR 3 SUBUNIT 9.; 99 KDA PROTEIN.                                                                                                                            |   |   |        |     |          |   |     |      |      |     |
| 946 | IPI00396370; IPI00719752; IPI00747447              | EIF3S9   |                                | GTQGVVTNFEIFR                                                                                                                                                                                                                                                                      | K | M | 95.00% | 41  | 734.3881 | 2 | 5.9 | 536  | 548  | No  |
|     |                                                    |          |                                | GYIFLEYASPAHAVDAVK                                                                                                                                                                                                                                                                 | K | N | 95.00% | 33  | 651.0084 | 3 | 6.6 | 231  | 248  | No  |
|     |                                                    |          |                                | ISOFORM 1 OF PLASMINOGEN ACTIVATOR INHIBITOR 1 RNA-BINDING PROTEIN.; ISOFORM 4 OF PLASMINOGEN ACTIVATOR INHIBITOR 1 RNA-BINDING PROTEIN.; ISOFORM 2 OF PLASMINOGEN ACTIVATOR INHIBITOR 1 RNA-BINDING PROTEIN.; ISOFORM 3 OF PLASMINOGEN ACTIVATOR INHIBITOR 1 RNA-BINDING PROTEIN. |   |   |        |     |          |   |     |      |      |     |
| 947 | IPI00410693; IPI00412714; IPI00470497; IPI00470498 | SERBP1   |                                | FDQLFDESDFPEVLK                                                                                                                                                                                                                                                                    | R | A | 95.00% | 84  | 972.4589 | 2 | 9.4 | 17   | 32   | No  |
|     |                                                    |          |                                | KPANDITSQLEINFGDLGR                                                                                                                                                                                                                                                                | R | P | 95.00% | 38  | 696.6995 | 3 | 4.9 | 340  | 358  | No  |
| 948 | IPI00465260                                        | GARS     | GARS PROTEIN.                  | LPFAAAQIPVDELVTK                                                                                                                                                                                                                                                                   | K | N | 95.00% | 52  | 696.3793 | 2 | 5.1 | 319  | 331  | No  |
|     |                                                    |          |                                | TVNVVQFEPK                                                                                                                                                                                                                                                                         | K | G | 95.00% | 55  | 624.3378 | 2 | 3.3 | 491  | 501  | No  |
| 949 | IPI00604624                                        | NIF3L1   | HYPOTHETICAL PROTEIN NIF3L1.   | INILSETDRDPLQVV                                                                                                                                                                                                                                                                    | K | - | 95.00% | 42  | 913.0145 | 2 | 7.6 | 362  | 377  | No  |
|     |                                                    |          |                                | VGIYSPHTAYDAAPQGVNWNLA                                                                                                                                                                                                                                                             |   |   |        |     |          |   |     |      |      |     |
|     |                                                    |          |                                | K                                                                                                                                                                                                                                                                                  | R | G | 95.00% | 34  | 824.7531 | 3 | 5.1 | 121  | 143  | No  |
|     |                                                    |          |                                | ETFASTASQLHSNVVYVQQIVA                                                                                                                                                                                                                                                             |   |   |        |     |          |   |     |      |      |     |
| 950 | IPI00642211                                        | RNPEP    | AMINOPEPTIDASE B.              | PK                                                                                                                                                                                                                                                                                 | K | G | 95.00% | 63  | 911.1458 | 3 | 6.3 | 632  | 656  | No  |
|     |                                                    |          |                                | TYQLVYFLDK                                                                                                                                                                                                                                                                         | K | I | 95.00% | 36  | 645.3459 | 2 | 4.5 | 540  | 549  | Yes |
|     |                                                    |          |                                | ALANYL-TRANSFER RNA SYNTHETASE FAMILY PROTEIN.; ISOFORM 1 OF ALANYL-TRNA SYNTHETASE DOMAIN-CONTAINING PROTEIN 1.                                                                                                                                                                   |   |   |        |     |          |   |     |      |      |     |
| 951 | IPI00748490; IPI00827636                           | AARSD1   |                                | GGGLFLLAGPPASVETLGR                                                                                                                                                                                                                                                                | K | V | 95.00% | 36  | 955.0399 | 2 | 8.8 | 349  | 368  | No  |
|     |                                                    |          |                                | TNLIFLSGNR                                                                                                                                                                                                                                                                         | R | V | 95.00% | 34  | 567.8198 | 2 | 4.1 | 236  | 245  | No  |
| 952 | IPI00791835                                        | ANK1     | PROTEIN.                       | LALQAQVPDELVTK                                                                                                                                                                                                                                                                     | K | L | 95.00% | 52  | 811.4663 | 2 | 4.9 | 428  | 442  | Yes |
|     |                                                    |          |                                | LLGNQATFSPIVTVEPR                                                                                                                                                                                                                                                                  | K | R | 95.00% | 66  | 921.5160 | 2 | 6.2 | 443  | 459  | No  |
| 953 | IPI00828062                                        |          | ANTI-(ED-B) SCFV (FRAGMENT).   | EVQLLESGGGLVQPGGSLR                                                                                                                                                                                                                                                                | - | L | 95.00% | 114 | 948.5184 | 2 | 5.1 | 1    | 19   | No  |
|     |                                                    |          |                                | FSGSGSGTDFLTISR                                                                                                                                                                                                                                                                    | R | L | 95.00% | 82  | 816.9050 | 2 | 9.3 | 193  | 208  | No  |
|     |                                                    |          |                                | NTLYLQMNLSR                                                                                                                                                                                                                                                                        | K | A | 95.00% | 65  | 684.8549 | 2 | 5.4 | 77   | 87   | Yes |
| 954 | IPI00830047                                        |          | PROTEIN.                       | AAPSVTLFPPSSEELQANK                                                                                                                                                                                                                                                                | K | A | 95.00% | 60  | 993.5208 | 2 | 7.7 | 5    | 23   | No  |
|     |                                                    |          |                                | YAASSYLSLTPEQWK                                                                                                                                                                                                                                                                    | K | S | 95.00% | 91  | 872.4412 | 2 | 8.6 | 66   | 80   | No  |

<sup>1</sup>Proteins that share the same group of assigned peptides

<sup>2</sup>Indication of whether a peptide was assigned to more than one protein
